# Supplementary material for: Genome-wide association study of drought tolerance and biomass allocation in wheat
Source: PLoS One. 2019 Dec 4;14(12):e0225383. doi: 10.1371/journal.pone.0225383 (PMC6892492; doi:10.1371/journal.pone.0225383)
Supplement: S3 Table — (CSV) [file pone.0225383.s003.csv]

SNP	Chromosome	Position	P.value	maf	nobs	Rsquare.of.Model.without.SNP	Rsquare.of.Model.with.SNP	FDR_Adjusted_P-values	effect
M10834	5B	417804694	0.00024992	0.082474227	99	0.052954189	0.204371571	0.043231604	-3.116586468
M5627	2D	593032041	0.000476426	0.371134021	99	0.052954189	0.189798553	0.047367415	4.388105698
M4469	2B	617949676	0.000501794	0.463917526	99	0.052954189	0.188638854	0.038986211	-1.768395538
M40	1A	2236676	0.000520951	0.154639175	99	0.052954189	0.187802387	0.040729145	-2.3275329
M9904	5A	36740586	0.000781019	0.422680412	99	0.052954189	0.178822648	0.041279421	-2.502396291
M6305	3A	52962542	0.000859624	0.18556701	99	0.052954189	0.176712578	0.040263514	2.178951759
M576	1A	45100852	0.001008287	0.154639175	99	0.052954189	0.173216791	0.039632951	1.976824706
M1278	1B	379091249	0.00104533	0.340206186	99	0.052954189	0.172428545	0.047272723	4.359418327
M11730	5B	669502971	0.001368108	0.340206186	99	0.052954189	0.166578452	0.039951068	-2.078930098
M8478	3D	132061276	0.001402193	0.030927835	99	0.052954189	0.166046022	0.045598072	-3.848860663
M1525	1B	588259435	0.001557391	0.371134021	99	0.052954189	0.163779683	0.045176629	3.719395064
M10899	5B	562408622	0.002017144	0.412371134	99	0.052954189	0.158229139	0.041690118	2.632398956
M194	1A	489600357	0.002078586	0.484536082	99	0.052954189	0.15758846	0.078763353	1.895980354
M7071	3B	15205844	0.002182654	0.072164948	99	0.052954189	0.156546723	0.083193625	-2.602901469
M9861	5A	14849690	0.002215765	0.391752577	99	0.052954189	0.156226036	0.084426876	-2.797434698
M311	1A	362317345	0.002279933	0.288659794	99	0.052954189	0.155618416	0.084278586	2.77409368
M216	1A	288094235	0.002573332	0.030927835	99	0.052954189	0.153048666	0.091683909	-3.923598105
M6088	3A	7019713	0.002661974	0.237113402	99	0.052954189	0.152331712	0.07791049	1.758386983
M310	1A	362317345	0.002751724	0.195876289	99	0.052954189	0.151630567	0.080776334	2.218783953
M1232	1B	86102631	0.002755506	0.257731959	99	0.052954189	0.151601544	0.080786231	2.220364284
M12795	6A	599622814	0.002871589	0.432989691	99	0.052954189	0.150730227	0.082868552	-2.551464583
M8660	4A	321099074	0.002877885	0.082474227	99	0.052954189	0.150684018	0.081349088	-2.310139265
M13589	6B	676372364	0.002946464	0.432989691	99	0.052954189	0.150187362	0.076000727	-1.448447132
M1111	1B	744753328	0.002986586	0.360824742	99	0.052954189	0.149902322	0.094894483	-4.412274561
M1785	1B	646178482	0.002993325	0.268041237	99	0.052954189	0.149854831	0.077085708	1.624845494
M6232	3A	305876520	0.003196968	0.319587629	99	0.052954189	0.148469825	0.090169529	-3.691121285
M9961	5A	99461147	0.003213332	0.350515464	99	0.052954189	0.148362529	0.076707882	1.563512341
M9054	4A	660462703	0.003223951	0.103092784	99	0.052954189	0.1482932	0.081943572	-2.404734309
M10897	5B	525773748	0.00327979	0.154639175	99	0.052954189	0.147932511	0.079810091	-2.064175117
M8636	4A	536855271	0.00362332	0.175257732	99	0.052954189	0.145844697	0.081581721	2.347183535
M8092	3B	808502629	0.003657542	0.319587629	99	0.052954189	0.145648057	0.077590859	1.706691243
M9909	5A	38118455	0.003741489	0.257731959	99	0.052954189	0.145173679	0.079166595	-1.960862947
M14537	7A	67066600	0.003893564	0.371134021	99	0.052954189	0.144341778	0.088812097	3.481629718
M5968	2D	644662016	0.00401494	0.041237113	99	0.052954189	0.143701655	0.087888883	-3.338540477
M15401	7B	511064939	0.004194329	0.030927835	99	0.052954189	0.142791446	0.093641008	4.222151045
M8801	4A	603746204	0.004203533	0.216494845	99	0.052954189	0.142745836	0.077618368	1.711143335
M11616	5B	592839477	0.004303231	0.268041237	99	0.052954189	0.142258386	0.076539832	-1.536200184
M5275	2B	792988297	0.004466227	0.216494845	99	0.052954189	0.141486166	0.080309309	-2.144132467
M14544	7A	69893167	0.004660096	0.463917526	99	0.052954189	0.140604916	0.078187123	-1.803071239
M11600	5B	683229885	0.004757307	0.432989691	99	0.052954189	0.140177261	0.078056149	1.78192171
M8624	4A	114487333	0.004997654	0.350515464	99	0.052954189	0.139157727	0.076466937	1.524346653
M7482	3B	415050293	0.005043457	0.474226804	99	0.052954189	0.138969223	0.079043756	-1.941109444
M9100	4A	220162554	0.005085892	0.432989691	99	0.052954189	0.138796158	0.082008588	-2.415065836
M1671	1B	628033554	0.005114101	0.350515464	99	0.052954189	0.138681943	0.098981232	5.026414592
M4438	2B	658484745	0.005127286	0.422680412	99	0.052954189	0.138628782	0.076869489	1.589758518
M13861	6D	1585297	0.005146751	0.412371134	99	0.052954189	0.138550561	0.077461668	-1.685776361
M10700	5B	326575231	0.005199089	0.422680412	99	0.052954189	0.13834175	0.07982813	-2.067067217
M15445	7B	541509916	0.005212884	0.350515464	99	0.052954189	0.13828708	0.076569203	-1.540975031
M5177	2B	0	0.005213138	0.268041237	99	0.052954189	0.138286073	0.076878533	-1.591226919
M14331	7A	22088450	0.005291286	0.350515464	99	0.052954189	0.13797918	0.076479444	1.526380636
M9903	5A	36740586	0.00539611	0.463917526	99	0.052954189	0.137574845	0.078942438	1.924809175
M512	1A	548315191	0.0057183	0.288659794	99	0.052954189	0.136381363	0.076029836	-1.453190745
M10987	5B	476806091	0.005902083	0.360824742	99	0.052954189	0.135731517	0.080320026	-2.145847221
M11703	5B	644347628	0.005957403	0.257731959	99	0.052954189	0.135540024	0.077030051	1.615816925
M6833	3A	320011979	0.006125861	0.072164948	99	0.052954189	0.134968097	0.081059268	2.263939363
M1567	1B	592833254	0.006216703	0.360824742	99	0.052954189	0.134666438	0.081529899	-2.338934464
M7512	3B	422916679	0.006429312	0.134020619	99	0.052954189	0.133977991	0.078998764	-1.933871961
M545	1A	370367976	0.006484659	0.422680412	99	0.052954189	0.133802656	0.077476216	-1.688132172
M14323	7A	5748407	0.006510824	0.453608247	99	0.052954189	0.13372031	0.080676963	2.202912049
M1009	1B	39514123	0.006512574	0.020618557	99	0.052954189	0.133714816	0.098377735	-4.936263157
M1224	1B	0	0.006512574	0.020618557	99	0.052954189	0.133714816	0.098377735	-4.936263157
M14340	7A	0	0.006634077	0.175257732	99	0.052954189	0.133336988	0.079252434	-1.974660379
M11709	5B	656933443	0.00679418	0.175257732	99	0.052954189	0.132849989	0.077919978	-1.759920473
M1241	1B	124479537	0.006896921	0.06185567	99	0.052954189	0.132543726	0.084820791	-2.859370905
M11566	5B	576348103	0.006969466	0.144329897	99	0.052954189	0.132330322	0.080284022	-2.140086346
M6899	3B	665978534	0.007027797	0.103092784	99	0.052954189	0.132160402	0.080700426	-2.206660191
M1805	1B	565614324	0.007311406	0.216494845	99	0.052954189	0.131354655	0.076593988	1.545003966
M1298	1B	65947056	0.00740461	0.164948454	99	0.052954189	0.131096949	0.079025656	1.93819803
M11058	5B	0	0.007415629	0.319587629	99	0.052954189	0.131066707	0.069991835	-1.555955781
M7793	3B	732431585	0.007468669	0.051546392	99	0.052954189	0.130921783	0.077163358	-2.811499321
M10038	5A	445275979	0.007501089	0.113402062	99	0.052954189	0.130833726	0.078441955	-3.031182557
M10118	5A	742010724	0.007501089	0.113402062	99	0.052954189	0.130833726	0.078441955	3.031182557
M12813	6A	458483574	0.007518132	0.432989691	99	0.052954189	0.130787595	0.07047551	-1.641942407
M2348	2A	10847132	0.007698837	0.453608247	99	0.052954189	0.130305065	0.077820292	2.92452127
M10713	5B	327196367	0.007735712	0.391752577	99	0.052954189	0.130208052	0.084964201	-4.133808217
M9912	5A	36718388	0.007799535	0.020618557	99	0.052954189	0.130041273	0.084270868	4.017971083
M13005	6B	11974839	0.007977831	0.453608247	99	0.052954189	0.129582795	0.068925161	-1.365621174
M11719	5B	658559745	0.007986418	0.381443299	99	0.052954189	0.129560983	0.078471735	-3.036284948
M2166	1D	426987465	0.008030692	0.453608247	99	0.052954189	0.129448917	0.072654292	2.026871216
M15163	7B	1747393	0.008110513	0.175257732	99	0.052954189	0.12924849	0.07070114	-1.681987115
M12799	6A	599927110	0.008131405	0.309278351	99	0.052954189	0.12919637	0.070249353	-1.601761329
M11894	5D	37040045	0.00818733	0.154639175	99	0.052954189	0.129057541	0.07052192	-1.650182713
M11578	5B	581759209	0.008253843	0.453608247	99	0.052954189	0.128893707	0.072258371	-1.957212373
M1468	1B	0	0.008306345	0.164948454	99	0.052954189	0.128765354	0.071719713	1.862235758
M11767	5B	683514701	0.008319871	0.350515464	99	0.052954189	0.128732424	0.069965553	-1.551277644
M2265	1D	482503736	0.00836854	0.463917526	99	0.052954189	0.128614395	0.070201814	-1.593309614
M1476	1B	544133182	0.008382954	0.257731959	99	0.052954189	0.128579577	0.073649432	2.201401003
M4552	2B	565077064	0.008450529	0.309278351	99	0.052954189	0.128417171	0.074491058	-2.348394573
M14321	7A	41580720	0.008483515	0.402061856	99	0.052954189	0.128338386	0.071237246	-1.776964563
M2951	2A	691845663	0.008689833	0.350515464	99	0.052954189	0.127852747	0.069366086	1.444416851
M14943	7A	487298553	0.008897522	0.350515464	99	0.052954189	0.127375884	0.085110491	-4.158209125
M5207	2B	776263331	0.008969724	0.319587629	99	0.052954189	0.12721282	0.06901415	1.381537543
M11806	5B	690702090	0.008994645	0.463917526	99	0.052954189	0.127156856	0.07330716	2.141461914
M6309	3A	0	0.009295794	0.195876289	99	0.052954189	0.126493093	0.072940559	-2.077158557
M12930	6A	0	0.009419232	0.422680412	99	0.052954189	0.126227485	0.068806621	-1.34440878
M8595	4A	392658355	0.009504388	0.443298969	99	0.052954189	0.126046361	0.07322371	-2.12683375
M3933	2B	657506318	0.009532229	0.360824742	99	0.052954189	0.12598751	0.069605372	-1.487108757
M11768	5B	683514701	0.00962035	0.309278351	99	0.052954189	0.125802419	0.070199753	1.59294323
M10347	5A	565612395	0.009796129	0.257731959	99	0.052954189	0.12543844	0.070274825	-1.606289022
M2974	2A	541992663	0.009800449	0.340206186	99	0.052954189	0.12542958	0.06880824	1.344698694
M1655	1B	589090638	0.009802696	0.288659794	99	0.052954189	0.125424973	0.073401104	2.157922673
M527	1A	534836196	0.009901896	0.463917526	99	0.052954189	0.125222704	0.069777864	1.517853328
M11005	5B	481080959	0.010009026	0.432989691	99	0.052954189	0.12500663	0.069370152	1.445142741
M5377	2D	13833777	0.01007511	0.268041237	99	0.052954189	0.124874544	0.071292351	1.786713619
M2145	1D	409346078	0.010084574	0.175257732	99	0.052954189	0.124855702	0.076785113	2.746278836
M6206	3A	567030074	0.010212356	0.010309278	99	0.052954189	0.124603093	0.091490047	5.209132112
M9369	4A	8464531	0.010212356	0.010309278	99	0.052954189	0.124603093	0.091490047	5.209132112
M6752	3A	0	0.010212356	0.010309278	99	0.052954189	0.124603093	0.091490047	-5.209132112
M8725	4A	535036625	0.010212356	0.010309278	99	0.052954189	0.124603093	0.091490047	-5.209132112
M12761	6A	595578856	0.010213954	0.494845361	99	0.052954189	0.124599954	0.07142155	1.809561153
M1938	1B	398676269	0.01029074	0.474226804	99	0.052954189	0.124449766	0.069195686	-1.413985352
M14330	7A	16886742	0.010618246	0.360824742	99	0.052954189	0.123822072	0.0788648	3.103570886
M1878	1B	481501570	0.010728748	0.12371134	99	0.052954189	0.123614843	0.072429971	-1.987419531
M7726	3B	42311437	0.010745872	0.474226804	99	0.052954189	0.123582929	0.071530619	-1.828838176
M3141	2A	755679306	0.01075851	0.329896907	99	0.052954189	0.12355941	0.073050411	2.096438296
M4753	2B	600038125	0.010851761	0.474226804	99	0.052954189	0.123386759	0.069420341	1.454101072
M5544	2D	400056735	0.010899139	0.350515464	99	0.052954189	0.123299633	0.069009044	1.380624401
M10739	5B	117505937	0.010967124	0.051546392	99	0.052954189	0.123175304	0.077834571	2.926974319
M12535	6A	450448212	0.010987183	0.463917526	99	0.052954189	0.123138772	0.072528484	-2.004750077
M1095	1B	342391060	0.011098795	0.350515464	99	0.052954189	0.122936779	0.084006555	-3.973727857
M1359	1B	30505270	0.011098795	0.350515464	99	0.052954189	0.122936779	0.084006555	-3.973727857
M10039	5A	441478599	0.01146039	0.402061856	99	0.052954189	0.122296669	0.068715626	-1.328117199
M7749	3B	752319025	0.011568794	0.381443299	99	0.052954189	0.122108878	0.070413668	1.630959381
M10032	5A	436890364	0.011576087	0.278350515	99	0.052954189	0.122096311	0.069084679	-1.39414732
M3784	2B	91146822	0.011605988	0.144329897	99	0.052954189	0.122044869	0.071002621	-1.735427368
M1879	1B	670160278	0.011625728	0.422680412	99	0.052954189	0.122010986	0.07498139	-2.43377771
M321	1A	478261760	0.011752252	0.06185567	99	0.052954189	0.121795225	0.073820397	-2.231305964
M11171	5B	425076594	0.011763402	0.298969072	99	0.052954189	0.121776328	0.073148262	-2.113603595
M11611	5B	589677095	0.011840529	0.484536082	99	0.052954189	0.121646123	0.0710073	1.736256184
M1345	1B	214068731	0.011850052	0.226804124	99	0.052954189	0.121630107	0.069678443	1.500135871
M2332	2A	441309055	0.01209044	0.237113402	99	0.052954189	0.121230242	0.073111424	2.107142369
M5542	2D	530255014	0.012156474	0.309278351	99	0.052954189	0.121121856	0.069882717	-1.536529565
M10647	5B	38051017	0.012181758	0.092783505	99	0.052954189	0.121080519	0.074177726	-2.293734715
M11985	5D	548463362	0.012635336	0.06185567	99	0.052954189	0.120353845	0.075645066	-2.549050184
M8803	4A	603746270	0.01263938	0.06185567	99	0.052954189	0.120347489	0.077854639	2.930421759
M9145	4A	364049164	0.012672731	0.443298969	99	0.052954189	0.120295158	0.072996915	-2.087050672
M7750	3B	752319025	0.013045518	0.391752577	99	0.052954189	0.119719845	0.069447607	-1.458966861
M13009	6B	12741874	0.013058922	0.309278351	99	0.052954189	0.11969948	0.070811323	1.701526893
M12907	6A	615640353	0.013082413	0.432989691	99	0.052954189	0.119663844	0.069612536	1.488386184
M12764	6A	391337338	0.013161574	0.175257732	99	0.052954189	0.119544248	0.070469954	-1.640955845
M4981	2B	760132062	0.013247179	0.432989691	99	0.052954189	0.119415761	0.070237463	-1.599647587
M3860	2B	657158433	0.013248328	0.103092784	99	0.052954189	0.119414042	0.071029073	-1.740112707
M15118	7A	0	0.01328503	0.402061856	99	0.052954189	0.119359228	0.068819692	1.346748455
M2235	1D	583819101	0.013349459	0.216494845	99	0.052954189	0.119263382	0.069083805	1.393990965
M12440	6A	243916466	0.013460083	0.113402062	99	0.052954189	0.119099945	0.071799092	1.876246859
M13006	6B	11974839	0.013480102	0.360824742	99	0.052954189	0.119070519	0.06948479	1.465601464
M6312	3A	69361313	0.013486113	0.474226804	99	0.052954189	0.119061692	0.069744565	-1.511920033
M2095	1D	366012746	0.013503439	0.237113402	99	0.052954189	0.119036273	0.07292849	2.075039668
M481	1A	610154156	0.013521631	0.309278351	99	0.052954189	0.119009621	0.069079547	1.393229908
M13529	6B	655890375	0.013527172	0.237113402	99	0.052954189	0.11900151	0.072837752	2.059106411
M9955	5A	52357838	0.013641118	0.24742268	99	0.052954189	0.118835493	0.070118464	-1.578486681
M7090	3B	22917259	0.013666812	0.06185567	99	0.052954189	0.118798259	0.075619582	-2.544630089
M11302	5B	93785910	0.013707173	0.12371134	99	0.052954189	0.118739917	0.071257822	1.780605035
M30	1A	150794362	0.013777404	0.082474227	99	0.052954189	0.118638826	0.07160721	1.842369121
M837	1B	19772673	0.014033357	0.051546392	99	0.052954189	0.118274926	0.076839958	2.755742358
M297	1A	27978274	0.014051453	0.381443299	99	0.052954189	0.118249462	0.071874744	1.889595291
M5942	2D	625109798	0.01425559	0.432989691	99	0.052954189	0.117964567	0.068627067	1.312254995
M2117	1D	487103554	0.014259849	0.18556701	99	0.052954189	0.117958668	0.075647869	-2.549536265
M10248	5A	538581590	0.014336016	0.226804124	99	0.052954189	0.117853498	0.069950311	-1.548564452
M6745	3A	716253361	0.014377289	0.216494845	99	0.052954189	0.117796751	0.069542605	-1.47591499
M2291	1D	586317908	0.014383328	0.484536082	99	0.052954189	0.117788464	0.070678524	-1.677975159
M11579	5B	581759209	0.014388599	0.319587629	99	0.052954189	0.117781232	0.069759786	-1.514632356
M12709	6A	462272539	0.014427734	0.412371134	99	0.052954189	0.117727629	0.072773566	2.047831567
M11608	5B	587341324	0.014474234	0.195876289	99	0.052954189	0.117664134	0.070267589	1.605002943
M12792	6A	599680412	0.014511195	0.329896907	99	0.052954189	0.117613817	0.069156132	-1.406917834
M14155	7A	17888082	0.0145364	0.381443299	99	0.052954189	0.117579582	0.07592702	2.597920079
M1786	1B	646178482	0.014552204	0.164948454	99	0.052954189	0.117558147	0.069931025	-1.545130983
M8033	3B	41316128	0.014613162	0.288659794	99	0.052954189	0.1174757	0.069654816	1.495924114
M10264	5A	540039194	0.014629821	0.216494845	99	0.052954189	0.11745323	0.069015659	-1.381807366
M2499	2A	30335188	0.014630363	0.18556701	99	0.052954189	0.1174525	0.070230736	1.598451651
M1884	1B	480971976	0.014656279	0.432989691	99	0.052954189	0.1174176	0.071813608	1.878808494
M13004	6B	17701756	0.014695656	0.474226804	99	0.052954189	0.117364696	0.068604181	1.308154616
M13540	6B	657260591	0.014710929	0.381443299	99	0.052954189	0.117344217	0.076750328	-2.740275531
M13887	6D	6268088	0.014781233	0.381443299	99	0.052954189	0.117250233	0.072102607	-1.929772327
M2966	2A	705340913	0.014783782	0.072164948	99	0.052954189	0.117246834	0.072669502	-2.029544744
M8900	4A	668854110	0.014800474	0.268041237	99	0.052954189	0.117224593	0.072622994	2.02136928
M12765	6A	596176929	0.014811549	0.195876289	99	0.052954189	0.117209851	0.070055565	1.567296774
M14853	7A	497467437	0.014886873	0.371134021	99	0.052954189	0.117109891	0.073551214	-2.184210465
M3848	2B	78508701	0.014891623	0.288659794	99	0.052954189	0.117103605	0.068945338	1.369230614
M11158	5B	518232510	0.014993644	0.309278351	99	0.052954189	0.116969104	0.069231583	-1.420398277
M1380	1B	444421058	0.015073854	0.164948454	99	0.052954189	0.11686403	0.072277745	1.960624101
M10893	5B	370732351	0.015079221	0.371134021	99	0.052954189	0.11685702	0.075313498	-2.491503181
M15041	7A	720347008	0.015104248	0.340206186	99	0.052954189	0.116824367	0.089540376	-4.890626492
M15072	7A	712981055	0.015104248	0.340206186	99	0.052954189	0.116824367	0.089540376	-4.890626492
M8080	3B	793102915	0.015104248	0.340206186	99	0.052954189	0.116824367	0.089540376	-4.890626492
M9326	4A	650837952	0.015104248	0.340206186	99	0.052954189	0.116824367	0.089540376	-4.890626492
M430	1A	940053	0.015104248	0.340206186	99	0.052954189	0.116824367	0.089540376	4.890626492
M6205	3A	567030074	0.015104248	0.340206186	99	0.052954189	0.116824367	0.089540376	4.890626492
M9221	4A	720689979	0.015122161	0.278350515	99	0.052954189	0.116801031	0.070368727	-1.622975776
M11818	5B	691998063	0.015245257	0.298969072	99	0.052954189	0.116641448	0.06916166	1.407905773
M8956	4A	648906704	0.015259438	0.082474227	99	0.052954189	0.116623151	0.071555231	1.833186649
M5824	2D	599789141	0.015432047	0.278350515	99	0.052954189	0.116401855	0.070701467	-1.682045157
M3570	2B	31382129	0.015450162	0.24742268	99	0.052954189	0.116378782	0.069978364	-1.553558008
M7462	3B	282944591	0.015455137	0.298969072	99	0.052954189	0.11637245	0.068195078	-1.234780772
M9115	4A	700739397	0.015486113	0.134020619	99	0.052954189	0.116333074	0.070379233	1.624842341
M2663	2A	120722528	0.015518316	0.360824742	99	0.052954189	0.116292226	0.070486657	1.643921844
M5554	2D	412255620	0.015530776	0.371134021	99	0.052954189	0.116276445	0.070271164	-1.605638265
M8633	4A	531682048	0.015572025	0.494845361	99	0.052954189	0.116224296	0.07166234	1.85210568
M9633	4B	0	0.015843416	0.237113402	99	0.052954189	0.115884766	0.068656444	-1.317517596
M5757	2D	593851647	0.015985412	0.474226804	99	0.052954189	0.115709545	0.069796963	-1.521255841
M11710	5B	656933443	0.016078934	0.350515464	99	0.052954189	0.11559503	0.074221915	-2.301448144
M12976	6B	2439812	0.016095018	0.340206186	99	0.052954189	0.115575405	0.068288142	1.251484921
M1773	1B	582835957	0.016126133	0.494845361	99	0.052954189	0.1155375	0.070015869	1.56023307
M11087	5B	88134360	0.016229924	0.443298969	99	0.052954189	0.115411616	0.070553757	-1.655834591
M11845	5B	549656486	0.016278615	0.443298969	99	0.052954189	0.11535285	0.072041137	-1.918937956
M6857	3A	311754583	0.016331897	0.06185567	99	0.052954189	0.115288756	0.073358941	2.150535724
M14665	7A	112180967	0.016408794	0.154639175	99	0.052954189	0.11519664	0.069812243	-1.523977858
M2719	2A	410880700	0.016473764	0.154639175	99	0.052954189	0.115119165	0.071344381	1.79591616
M2129	1D	244297621	0.016475062	0.484536082	99	0.052954189	0.11511762	0.07437163	2.327569706
M13145	6B	80049070	0.016534033	0.360824742	99	0.052954189	0.115047582	0.077268947	2.829686989
M9910	5A	38118455	0.01654131	0.412371134	99	0.052954189	0.115038957	0.070301187	-1.610974505
M9923	5A	43492598	0.016545233	0.381443299	99	0.052954189	0.115034309	0.075745112	-2.566397671
M11601	5B	683229855	0.016556087	0.154639175	99	0.052954189	0.115021456	0.071158562	1.763039797
M3807	2B	157603272	0.016606878	0.268041237	99	0.052954189	0.114961427	0.070301518	1.611033238
M2267	1D	95949764	0.016646759	0.381443299	99	0.052954189	0.114914428	0.068228959	1.240863051
M5340	2B	22348080	0.01680341	0.113402062	99	0.052954189	0.114730953	0.071273506	1.783379909
M3844	2B	136811320	0.016886209	0.402061856	99	0.052954189	0.1146347	0.071972947	1.906915654
M8717	4A	514257276	0.016945361	0.494845361	99	0.052954189	0.114566241	0.069153237	1.406400459
M13896	6D	7886166	0.017069433	0.257731959	99	0.052954189	0.114423458	0.072388379	1.980100137
M6057	3A	8862385	0.017071439	0.195876289	99	0.052954189	0.114421159	0.069203966	-1.415464724
M11700	5B	626337103	0.01729527	0.360824742	99	0.052954189	0.114166343	0.07336355	2.151343394
M2334	2A	2727484	0.01731922	0.154639175	99	0.052954189	0.114139283	0.075912967	-2.595485698
M1758	1B	0	0.017866492	0.360824742	99	0.052954189	0.113531447	0.070604264	1.664798801
M36	1A	2185082	0.017986777	0.360824742	99	0.052954189	0.113400478	0.074697575	-2.384378791
M5905	2D	755037267	0.018100887	0.340206186	99	0.052954189	0.113277079	0.068405095	1.272466291
M14621	7A	115321592	0.018290628	0.463917526	99	0.052954189	0.113073695	0.071017279	1.738023713
M3082	2A	735932521	0.01837846	0.340206186	99	0.052954189	0.112980298	0.067762007	1.156948338
M4786	2B	734672774	0.018518782	0.381443299	99	0.052954189	0.112832056	0.068089542	-1.215828875
M791	1B	179842147	0.018623006	0.06185567	99	0.052954189	0.112722713	0.074511994	2.352043973
M4471	2B	658485734	0.018655291	0.494845361	99	0.052954189	0.112688972	0.069469933	-1.462950556
M13718	6B	0	0.018925822	0.453608247	99	0.052954189	0.112408638	0.070251544	-1.602150744
M71	1A	10132748	0.018951371	0.268041237	99	0.052954189	0.112382382	0.069322398	-1.436617057
M977	1B	714373153	0.018951686	0.268041237	99	0.052954189	0.112382059	0.071037906	-1.741677102
M164	1A	0	0.019017324	0.443298969	99	0.052954189	0.112314774	0.067935951	1.188229805
M5955	2D	647308726	0.019075235	0.278350515	99	0.052954189	0.112255614	0.072592917	-2.016081155
M9902	5A	104616943	0.019144345	0.484536082	99	0.052954189	0.11218526	0.068899371	1.361007106
M13775	6B	0	0.019263216	0.494845361	99	0.052954189	0.112064873	0.068948219	-1.369746022
M11722	5B	657411744	0.019279775	0.226804124	99	0.052954189	0.112048165	0.068511759	-1.291591143
M12657	6A	574225981	0.019282886	0.288659794	99	0.052954189	0.112045027	0.068227145	1.240537504
M6394	3A	363608529	0.019370412	0.453608247	99	0.052954189	0.111956979	0.068122537	-1.221755107
M11717	5B	658559642	0.019467274	0.350515464	99	0.052954189	0.111860024	0.070578662	1.660255091
M12601	6A	540143428	0.01965888	0.474226804	99	0.052954189	0.111669724	0.071473894	1.818813638
M5549	2D	130133036	0.019753675	0.402061856	99	0.052954189	0.111576296	0.06909436	1.395877831
M8074	3B	790541416	0.019761007	0.360824742	99	0.052954189	0.11156909	0.068742388	1.332909371
M11728	5B	665685766	0.019763065	0.360824742	99	0.052954189	0.111567068	0.070443037	-1.636175581
M532	1A	566690179	0.019892508	0.268041237	99	0.052954189	0.111440316	0.068548672	-1.298207385
M1806	1B	565614324	0.019946342	0.288659794	99	0.052954189	0.111387856	0.068734026	-1.331412121
M12869	6A	609163470	0.020010651	0.24742268	99	0.052954189	0.111325384	0.071128916	1.757791913
M2828	2A	412255299	0.020041104	0.371134021	99	0.052954189	0.111295874	0.068977037	1.374900396
M6127	3A	19895266	0.020097281	0.288659794	99	0.052954189	0.111241562	0.067920145	-1.18538838
M4395	2B	575867441	0.020143637	0.443298969	99	0.052954189	0.111196865	0.071666719	-1.852878901
M1560	1B	685243263	0.020143689	0.051546392	99	0.052954189	0.111196815	0.076536165	2.703294501
M13891	6D	6745747	0.020156932	0.494845361	99	0.052954189	0.111184065	0.070209939	-1.5947542
M1763	1B	639941356	0.020175039	0.391752577	99	0.052954189	0.111166648	0.072775616	-2.048191803
M14324	7A	5748407	0.020247467	0.134020619	99	0.052954189	0.111097143	0.069876362	1.535397901
M5590	2D	28701054	0.020290309	0.278350515	99	0.052954189	0.111056153	0.070119936	1.578748539
M353	1A	485228466	0.020335513	0.329896907	99	0.052954189	0.111013002	0.071089402	1.750796202
M8193	3B	818284655	0.020394717	0.422680412	99	0.052954189	0.110956639	0.070593602	-1.662906681
M8822	4A	132119668	0.020457732	0.206185567	99	0.052954189	0.110896838	0.069187735	1.412564829
M3871	2B	106962921	0.020467728	0.278350515	99	0.052954189	0.110887368	0.070059008	1.567909423
M12634	6A	569695330	0.020470182	0.144329897	99	0.052954189	0.110885045	0.069344448	1.440554043
M12180	6A	724139212	0.02063422	0.072164948	99	0.052954189	0.110730377	0.072473847	-1.995139188
M11587	5B	8998565	0.020681578	0.484536082	99	0.052954189	0.110685965	0.070803568	1.70015195
M8488	3D	584224510	0.02075543	0.319587629	99	0.052954189	0.110616921	0.068670768	1.320083257
M5041	2B	749345224	0.020764997	0.164948454	99	0.052954189	0.110607995	0.069565202	1.479945223
M8610	4A	140700686	0.021292458	0.226804124	99	0.052954189	0.110122511	0.070704005	-1.68249537
M1352	1B	378833974	0.021300979	0.226804124	99	0.052954189	0.110114772	0.068462895	-1.282831164
M11738	5B	672858608	0.021482865	0.412371134	99	0.052954189	0.109950366	0.070310189	-1.612574159
M12097	6A	0	0.021496631	0.237113402	99	0.052954189	0.109937983	0.069178912	-1.410988278
M14196	7A	10111673	0.021567042	0.402061856	99	0.052954189	0.109874774	0.071730472	1.864135017
M12316	6A	19180814	0.021763476	0.020618557	99	0.052954189	0.10969958	0.082464165	3.714616416
M979	1B	6341226	0.02182612	0.257731959	99	0.052954189	0.10964406	0.072840116	-2.059521689
M4547	2B	37117645	0.021845753	0.288659794	99	0.052954189	0.109626694	0.06941695	1.453495755
M10197	5A	0	0.021849142	0.298969072	99	0.052954189	0.109623698	0.0696039	-1.486846197
M10527	5A	509428185	0.021953274	0.463917526	99	0.052954189	0.109531881	0.071823874	-1.880619912
M2765	2A	495220330	0.022025309	0.443298969	99	0.052954189	0.109468634	0.074436826	-2.338939355
M12070	6A	1062349	0.022114233	0.484536082	99	0.052954189	0.109390858	0.069836073	1.528222619
M11305	5B	14940437	0.022184485	0.226804124	99	0.052954189	0.109329647	0.069942991	-1.547261378
M2714	2A	133353425	0.022201913	0.206185567	99	0.052954189	0.109314493	0.072814743	2.055065018
M5262	2B	765884956	0.022274423	0.24742268	99	0.052954189	0.10925158	0.069341182	-1.439970935
M6079	3A	0	0.022345128	0.412371134	99	0.052954189	0.109190441	0.072633459	2.023208904
M12796	6A	599622814	0.022383098	0.391752577	99	0.052954189	0.109157693	0.070909681	1.718960967
M3935	2B	508735111	0.022385593	0.288659794	99	0.052954189	0.109155543	0.069735027	-1.51022047
M11745	5B	67371328	0.022399827	0.175257732	99	0.052954189	0.109143283	0.069117723	1.400053671
M2742	2A	385281482	0.02241089	0.226804124	99	0.052954189	0.10913376	0.070883441	-1.714310709
M10103	5A	467383563	0.022446217	0.453608247	99	0.052954189	0.109103383	0.068769993	1.33785181
M1883	1B	480971976	0.022602406	0.443298969	99	0.052954189	0.108969683	0.071984537	-1.908959271
M9200	4A	50748255	0.022619699	0.010309278	99	0.052954189	0.10895494	0.088179109	4.666873372
M1881	1B	668913016	0.022646337	0.432989691	99	0.052954189	0.108932254	0.072030106	-1.916993392
M8924	4A	50074687	0.022679141	0.041237113	99	0.052954189	0.108904354	0.075321131	-2.492828955
M4136	2B	347472378	0.022712367	0.206185567	99	0.052954189	0.108876138	0.070306057	1.611839973
M13912	6D	12019181	0.022775764	0.494845361	99	0.052954189	0.108822424	0.069719725	-1.507493585
M5614	2D	565128626	0.022846173	0.154639175	99	0.052954189	0.108762952	0.069309547	1.434322436
M12735	6A	594854466	0.022854845	0.195876289	99	0.052954189	0.10875564	0.069628552	1.491241769
M3846	2B	136811320	0.022924439	0.463917526	99	0.052954189	0.10869707	0.070067372	-1.569397606
M4872	2B	743417549	0.022993805	0.484536082	99	0.052954189	0.108638879	0.067816707	1.166788278
M9939	5A	2861753	0.023003368	0.206185567	99	0.052954189	0.10863087	0.069456916	1.460627971
M8076	3B	590943948	0.023003517	0.195876289	99	0.052954189	0.108630746	0.069077626	-1.3928865
M9077	4A	691165574	0.023149373	0.288659794	99	0.052954189	0.108509043	0.078743136	3.082756027
M9137	4A	23511186	0.023255628	0.443298969	99	0.052954189	0.108420892	0.072478172	1.995900044
M9768	4D	401082716	0.02327058	0.381443299	99	0.052954189	0.108408522	0.071307523	1.789397239
M14462	7A	41448486	0.023286891	0.12371134	99	0.052954189	0.108395037	0.071352505	1.797352816
M346	1A	486815863	0.0233626	0.12371134	99	0.052954189	0.108332575	0.071004153	1.735698763
M10147	5A	458562227	0.023508662	0.360824742	99	0.052954189	0.108212673	0.06977296	-1.516979605
M12530	6A	453550733	0.023546231	0.463917526	99	0.052954189	0.108181959	0.070229452	1.59822352
M6520	3A	633055334	0.023725972	0.484536082	99	0.052954189	0.108035731	0.068889312	-1.35920749
M5092	2B	172418924	0.023729036	0.381443299	99	0.052954189	0.108033248	0.067897756	1.18136328
M4436	2B	620850327	0.023996192	0.463917526	99	0.052954189	0.107818081	0.068330057	1.259005905
M5578	2D	420560644	0.024019138	0.072164948	99	0.052954189	0.107799719	0.071891083	-1.89247747
M12746	6A	609814795	0.024038698	0.24742268	99	0.052954189	0.107784081	0.068144826	1.225757889
M812	1B	0	0.024124186	0.278350515	99	0.052954189	0.10771589	0.070534559	-1.652426653
M1660	1B	164887594	0.024124638	0.134020619	99	0.052954189	0.10771553	0.069144311	-1.404805463
M14543	7A	69893167	0.024153937	0.144329897	99	0.052954189	0.107692219	0.069384111	-1.447634501
M14468	7A	60679438	0.024209496	0.278350515	99	0.052954189	0.107648096	0.071900455	1.894130671
M9082	4A	691718505	0.0242187	0.175257732	99	0.052954189	0.107640797	0.069654589	1.495883605
M1286	1B	390397669	0.024248094	0.288659794	99	0.052954189	0.107617506	0.071885154	1.891431561
M801	1B	37951885	0.024403781	0.329896907	99	0.052954189	0.107494639	0.075811302	2.577870539
M14310	7A	17286301	0.024715418	0.092783505	99	0.052954189	0.107251168	0.072271476	1.959520243
M7483	3B	349954850	0.024732572	0.154639175	99	0.052954189	0.107237861	0.070120579	-1.578862849
M7903	3B	564807126	0.024738463	0.103092784	99	0.052954189	0.107233294	0.074500247	-2.349996331
M11840	5B	621241019	0.024891827	0.288659794	99	0.052954189	0.107114781	0.070258512	-1.603389367
M6519	3A	633055334	0.024919036	0.134020619	99	0.052954189	0.107093836	0.070458403	1.638904494
M11016	5B	485806429	0.024937872	0.134020619	99	0.052954189	0.10707935	0.070176705	1.588844849
M6038	3A	488385956	0.025041528	0.051546392	99	0.052954189	0.106999842	0.074494188	2.34894015
M2768	2A	125458503	0.025155814	0.237113402	99	0.052954189	0.106912583	0.069873391	1.534868926
M14322	7A	41580720	0.025270545	0.402061856	99	0.052954189	0.106825403	0.070100547	-1.575299467
M5561	2D	432854196	0.025280219	0.391752577	99	0.052954189	0.106818072	0.067792552	1.162443305
M8475	3D	568041760	0.025355556	0.371134021	99	0.052954189	0.106761077	0.074920356	-2.423159854
M14346	7A	25304250	0.025405475	0.24742268	99	0.052954189	0.10672341	0.068582653	-1.304297188
M11110	5B	515186754	0.025431991	0.453608247	99	0.052954189	0.106703434	0.069090953	1.395268786
M4553	2B	632566016	0.025445713	0.24742268	99	0.052954189	0.106693106	0.071655201	1.850844871
M11936	5D	472425065	0.025642326	0.092783505	99	0.052954189	0.106545754	0.071869383	-1.888649404
M9165	4A	710830242	0.025683608	0.257731959	99	0.052954189	0.106514967	0.070475465	1.641934503
M5682	2D	0	0.025778827	0.24742268	99	0.052954189	0.106444154	0.069348093	1.441204682
M2316	1D	0	0.025784835	0.309278351	99	0.052954189	0.106439696	0.069105494	1.397867858
M9164	4A	348257403	0.025813738	0.103092784	99	0.052954189	0.106418261	0.071254181	-1.779960858
M9550	4B	29303212	0.025827143	0.257731959	99	0.052954189	0.106408329	0.069339549	-1.439679287
M1875	1B	670798572	0.025893446	0.443298969	99	0.052954189	0.106359281	0.071625561	1.845610295
M3145	2A	755740514	0.025981128	0.391752577	99	0.052954189	0.106294622	0.069358749	1.443107126
M11759	5B	681127665	0.02610833	0.494845361	99	0.052954189	0.106201229	0.071228881	1.775484454
M1036	1B	46096564	0.026119556	0.030927835	99	0.052954189	0.106193009	0.079270506	-3.172903449
M10180	5A	496609102	0.02617792	0.06185567	99	0.052954189	0.106150338	0.072542621	2.007236486
M287	1A	408616656	0.02620413	0.350515464	99	0.052954189	0.106131209	0.070336545	1.617257791
M7477	3B	311762515	0.02628897	0.134020619	99	0.052954189	0.106069425	0.070676538	-1.677622838
M11898	5D	60790147	0.026370014	0.381443299	99	0.052954189	0.106010603	0.070716165	-1.684652269
M5276	2B	792988297	0.026404315	0.164948454	99	0.052954189	0.105985764	0.070111982	1.577333596
M9908	5A	36021495	0.026512253	0.340206186	99	0.052954189	0.105907826	0.068104592	-1.218532037
M14287	7A	0	0.026530445	0.484536082	99	0.052954189	0.105894722	0.069205779	-1.415788459
M1423	1B	418720052	0.026558937	0.340206186	99	0.052954189	0.105874221	0.067581409	1.124441883
M1054	1B	3440095	0.026580535	0.030927835	99	0.052954189	0.105858694	0.078345138	3.01458979
M6137	3A	286518666	0.026635652	0.072164948	99	0.052954189	0.105819134	0.071207917	-1.771774841
M10858	5B	43702204	0.026654335	0.154639175	99	0.052954189	0.105805743	0.069414123	-1.452991297
M14285	7A	0	0.026828518	0.195876289	99	0.052954189	0.10568138	0.069152754	1.406314274
M42	1A	2276875	0.02690547	0.391752577	99	0.052954189	0.10562671	0.073159142	2.11551176
M2862	2A	562636225	0.02692832	0.164948454	99	0.052954189	0.105610508	0.068804034	1.343945679
M11300	5B	261777240	0.027192243	0.432989691	99	0.052954189	0.105424422	0.06847563	1.28511444
M4531	2B	673234348	0.027306036	0.216494845	99	0.052954189	0.105344779	0.06885786	1.35357931
M7815	3B	731136697	0.02732869	0.226804124	99	0.052954189	0.105328965	0.070260469	1.603737366
M9937	5A	79264462	0.027477625	0.371134021	99	0.052954189	0.105225347	0.067266476	1.067686634
M12146	6A	8803926	0.02748488	0.020618557	99	0.052954189	0.105220314	0.081203758	3.501674656
M8337	3D	48663994	0.027485512	0.463917526	99	0.052954189	0.105219876	0.067477589	1.105741768
M11862	5B	700001961	0.027518532	0.216494845	99	0.052954189	0.10519699	0.071415186	-1.80843595
M345	1A	486815863	0.027578517	0.278350515	99	0.052954189	0.105155491	0.076617867	-2.71740657
M14718	7A	90552202	0.02765211	0.298969072	99	0.052954189	0.105104707	0.06804506	-1.207838007
M9155	4A	353560638	0.027697057	0.175257732	99	0.052954189	0.10507376	0.071878567	1.890269642
M4700	2B	728611163	0.027778003	0.257731959	99	0.052954189	0.105018163	0.067795379	-1.162951801
M1870	1B	665409991	0.028041625	0.391752577	99	0.052954189	0.104838277	0.067296993	-1.073190019
M12633	6A	569695330	0.028065878	0.24742268	99	0.052954189	0.104821818	0.067989242	-1.197808185
M14574	7A	82946516	0.028069499	0.360824742	99	0.052954189	0.104819362	0.077192234	2.816473997
M3276	2A	768676643	0.028271456	0.144329897	99	0.052954189	0.104682906	0.070313864	-1.613227295
M1632	1B	587501291	0.028277287	0.206185567	99	0.052954189	0.104678982	0.06863683	1.314003935
M9721	4D	1206063	0.028287161	0.422680412	99	0.052954189	0.104672338	0.07079231	1.698155945
M7809	3B	544414886	0.028340747	0.072164948	99	0.052954189	0.104636326	0.072825549	2.056963055
M3252	2A	759751315	0.028396814	0.154639175	99	0.052954189	0.104598724	0.068824444	1.347599009
M13971	6D	60388899	0.02850763	0.195876289	99	0.052954189	0.104524636	0.071866867	1.888205533
M11714	5B	0	0.028548478	0.391752577	99	0.052954189	0.104497403	0.07448867	-2.347978199
M11696	5B	0	0.028548478	0.391752577	99	0.052954189	0.104497403	0.07448867	2.347978199
M13915	6D	12018140	0.028629028	0.402061856	99	0.052954189	0.104443821	0.071727423	-1.863596814
M3763	2B	91596926	0.028745766	0.06185567	99	0.052954189	0.104366451	0.073757543	2.220314301
M3882	2B	151895513	0.028749864	0.030927835	99	0.052954189	0.104363741	0.076053471	2.619817525
M6724	3A	715199344	0.028854099	0.443298969	99	0.052954189	0.104294949	0.067546477	-1.11815095
M9782	4D	446124259	0.028954818	0.12371134	99	0.052954189	0.104228728	0.069756085	1.513972876
M9078	4A	691165574	0.02895727	0.072164948	99	0.052954189	0.104227118	0.073035033	-2.093739931
M9084	4A	690887990	0.028975309	0.319587629	99	0.052954189	0.104215285	0.073162393	-2.116081901
M12424	6A	54772476	0.02898322	0.371134021	99	0.052954189	0.104210098	0.067935821	-1.188206477
M9030	4A	48707567	0.029029089	0.432989691	99	0.052954189	0.104180051	0.068269962	1.248222379
M6042	3A	0	0.029043215	0.24742268	99	0.052954189	0.104170808	0.068645983	-1.315643612
M9309	4A	719934001	0.029052484	0.350515464	99	0.052954189	0.104164746	0.068877292	1.357056662
M14604	7A	96563541	0.029080896	0.195876289	99	0.052954189	0.104146176	0.070735974	1.688165696
M11378	5B	99660656	0.029097048	0.020618557	99	0.052954189	0.104135628	0.081916487	-3.622222174
M4162	2B	680760736	0.029180553	0.195876289	99	0.052954189	0.104081192	0.069626052	1.490796066
M6073	3A	13376403	0.02927192	0.412371134	99	0.052954189	0.10402182	0.071062075	1.745957343
M11177	5B	0	0.029298691	0.06185567	99	0.052954189	0.104004461	0.074242294	2.30500474
M13897	6D	7716534	0.029314741	0.319587629	99	0.052954189	0.103994062	0.068779997	1.339642868
M9622	4B	645297932	0.029328058	0.443298969	99	0.052954189	0.103985438	0.070694456	1.680801478
M1767	1B	641218775	0.029336102	0.402061856	99	0.052954189	0.103980231	0.071281961	-1.784875632
M7737	3B	0	0.02938513	0.494845361	99	0.052954189	0.103948526	0.066920162	1.005173571
M7481	3B	415050293	0.029462406	0.422680412	99	0.052954189	0.103898669	0.071721549	1.862559778
M9075	4A	643624450	0.029590345	0.144329897	99	0.052954189	0.103816428	0.070149006	-1.583918858
M5612	2D	231460780	0.029822689	0.371134021	99	0.052954189	0.103668036	0.06871215	-1.32749486
M8762	4A	20319587	0.029929109	0.463917526	99	0.052954189	0.103600476	0.067967704	1.193937292
M11729	5B	669502971	0.030289603	0.216494845	99	0.052954189	0.103373502	0.068461734	-1.282622949
M11619	5B	589463513	0.030313585	0.329896907	99	0.052954189	0.103358505	0.067720511	1.149481891
M14181	7A	12011036	0.030332688	0.092783505	99	0.052954189	0.103346567	0.070785876	1.697015095
M2176	1D	0	0.030334334	0.24742268	99	0.052954189	0.103345539	0.070994776	1.734037833
M1816	1B	656423079	0.030347908	0.195876289	99	0.052954189	0.103337062	0.068605335	1.308361386
M11752	5B	679651559	0.030364507	0.391752577	99	0.052954189	0.103326702	0.071397119	-1.805241757
M12400	6A	38379225	0.030507846	0.350515464	99	0.052954189	0.103237481	0.080889649	-3.448435932
M5813	2D	593032041	0.030556714	0.484536082	99	0.052954189	0.103207166	0.067327171	1.078631462
M12245	6A	17925787	0.030666405	0.494845361	99	0.052954189	0.103139305	0.069537851	-1.47506702
M8589	4A	85574825	0.030672388	0.237113402	99	0.052954189	0.103135611	0.06943864	-1.457366709
M11705	5B	656933443	0.030968289	0.329896907	99	0.052954189	0.102953866	0.068877705	-1.357130558
M13990	6D	149883876	0.03100974	0.463917526	99	0.052954189	0.102928554	0.07145803	1.816009615
M3618	2B	49906735	0.031022707	0.422680412	99	0.052954189	0.102920643	0.06739831	-1.091455549
M7376	3B	79421097	0.031043082	0.072164948	99	0.052954189	0.10290822	0.072882304	2.066930385
M6069	3A	12934993	0.031098148	0.371134021	99	0.052954189	0.102874687	0.067652467	1.13723521
M5159	2B	782126877	0.031111909	0.278350515	99	0.052954189	0.102866318	0.068129407	-1.222988846
M11489	5B	550320578	0.031181984	0.463917526	99	0.052954189	0.102823756	0.06887057	1.35585385
M14179	7A	8931917	0.031192204	0.164948454	99	0.052954189	0.102817558	0.072104127	1.930040145
M3719	2B	73990357	0.031249544	0.412371134	99	0.052954189	0.102782819	0.068414897	1.27422419
M2355	2A	7028915	0.031308537	0.329896907	99	0.052954189	0.102747149	0.06935149	-1.441811284
M14396	7A	28554017	0.031314489	0.443298969	99	0.052954189	0.102743555	0.068001977	-1.200096661
M1713	1B	629664285	0.031329746	0.371134021	99	0.052954189	0.102734343	0.070361389	1.621672005
M6021	3A	8232937	0.031334608	0.360824742	99	0.052954189	0.102731408	0.075900301	-2.593291508
M5713	2D	610403424	0.031451909	0.12371134	99	0.052954189	0.102660758	0.069888668	1.537589283
M5171	2B	557779162	0.031542297	0.391752577	99	0.052954189	0.102606507	0.067077893	1.033658837
M14141	7A	0	0.031571767	0.06185567	99	0.052954189	0.102588855	0.072907503	2.071355073
M13026	6B	19336874	0.031599008	0.113402062	99	0.052954189	0.102572553	0.070338716	1.617643486
M6809	3A	0	0.031631393	0.340206186	99	0.052954189	0.102553193	0.070371938	-1.623546279
M12228	6A	16684480	0.031687064	0.216494845	99	0.052954189	0.102519961	0.07072158	1.685612688
M3433	2B	17064831	0.031859593	0.412371134	99	0.052954189	0.102417366	0.069339674	-1.439701592
M3131	2A	192381627	0.031880506	0.381443299	99	0.052954189	0.10240497	0.071693253	1.857564211
M9116	4A	700739397	0.031943274	0.092783505	99	0.052954189	0.102367817	0.07084057	-1.706711866
M4551	2B	565077064	0.031966344	0.268041237	99	0.052954189	0.102354181	0.071052633	1.744285151
M9259	4A	724783161	0.031990828	0.072164948	99	0.052954189	0.102339721	0.072906669	2.071208594
M15036	7A	623842854	0.031999136	0.340206186	99	0.052954189	0.102334817	0.068365239	-1.265317401
M11351	5B	531853859	0.032043136	0.350515464	99	0.052954189	0.102308867	0.067823227	1.167960845
M1071	1B	21849576	0.032141231	0.350515464	99	0.052954189	0.10225115	0.071117234	1.755723857
M8581	4A	45140360	0.032177564	0.041237113	99	0.052954189	0.10222982	0.074765682	-2.396238743
M8580	4A	54405419	0.032177564	0.041237113	99	0.052954189	0.10222982	0.074765682	2.396238743
M8895	4A	635530599	0.032419905	0.412371134	99	0.052954189	0.102088201	0.067675978	1.141467136
M2230	1D	330701339	0.032431284	0.350515464	99	0.052954189	0.102081579	0.080456821	-3.374962238
M10776	5B	400424727	0.032654929	0.103092784	99	0.052954189	0.101951928	0.070888126	1.71514105
M9599	4B	785378125	0.032841516	0.463917526	99	0.052954189	0.101844481	0.069767736	-1.516048703
M1254	1B	380772381	0.032869914	0.257731959	99	0.052954189	0.101828184	0.069203012	-1.415294259
M11137	5B	44882805	0.032885684	0.082474227	99	0.052954189	0.101819141	0.071464734	-1.817194596
M6620	3A	686200851	0.032904072	0.18556701	99	0.052954189	0.101808602	0.068856244	-1.35329027
M9558	4B	596374461	0.032953283	0.360824742	99	0.052954189	0.101780429	0.068180736	-1.232205904
M3043	2A	7184810	0.033052193	0.432989691	99	0.052954189	0.101723938	0.069100796	-1.397028213
M7205	3B	0	0.03313925	0.391752577	99	0.052954189	0.101674365	0.071226649	1.775089478
M12398	6A	610402426	0.033208143	0.340206186	99	0.052954189	0.101635234	0.069750215	-1.512926922
M1827	1B	659387123	0.033318583	0.432989691	99	0.052954189	0.101572683	0.070969739	1.72960256
M8608	4A	63826057	0.033388483	0.340206186	99	0.052954189	0.101533207	0.075758778	-2.56876665
M15196	7B	85902767	0.033469756	0.432989691	99	0.052954189	0.101487419	0.068549068	-1.298278451
M1904	1B	680160129	0.033486262	0.288659794	99	0.052954189	0.101478134	0.067807314	-1.165098623
M7317	3B	44728934	0.033501333	0.360824742	99	0.052954189	0.101469661	0.076953708	-2.775362836
M14801	7A	577687730	0.033648874	0.391752577	99	0.052954189	0.101386922	0.067280699	-1.070251716
M9683	4B	665957105	0.033821995	0.092783505	99	0.052954189	0.101290329	0.070268153	-1.60510312
M11872	5B	693686046	0.033825351	0.474226804	99	0.052954189	0.101288461	0.068131234	-1.223317057
M5957	2D	16633732	0.033933202	0.463917526	99	0.052954189	0.101228558	0.071249474	1.779128129
M1876	1B	670798572	0.033981638	0.12371134	99	0.052954189	0.101201721	0.070331435	1.616349789
M906	1B	210395910	0.034167606	0.422680412	99	0.052954189	0.101099059	0.067704102	-1.146528861
M1014	1B	4821459	0.034247663	0.051546392	99	0.052954189	0.101055047	0.073725719	2.214747851
M4933	2B	746932893	0.034266112	0.422680412	99	0.052954189	0.10104492	0.067863649	1.175230442
M14684	7A	145828927	0.034347979	0.134020619	99	0.052954189	0.101000052	0.072027853	1.916596292
M9905	5A	34323774	0.034391421	0.288659794	99	0.052954189	0.100976289	0.069198578	-1.41450196
M1038	1B	92259228	0.034498607	0.072164948	99	0.052954189	0.100917795	0.071049092	-1.743658088
M6853	3A	745517190	0.034718871	0.350515464	99	0.052954189	0.100798196	0.078232317	-2.995245752
M1403	1B	333219089	0.03474423	0.371134021	99	0.052954189	0.100784479	0.068180479	1.232159767
M72	1A	10132748	0.034763046	0.154639175	99	0.052954189	0.100774308	0.070951648	1.726397382
M15277	7B	106862437	0.034779798	0.453608247	99	0.052954189	0.100765257	0.067021814	-1.023533985
M10839	5B	454180549	0.034818049	0.391752577	99	0.052954189	0.100744608	0.072696173	2.034232434
M8839	4A	441981603	0.034823187	0.12371134	99	0.052954189	0.100741836	0.070746907	-1.690104713
M11989	5D	551446740	0.034857397	0.257731959	99	0.052954189	0.100723393	0.06883133	-1.348831444
M6180	3A	353247178	0.034938532	0.391752577	99	0.052954189	0.100679727	0.071148897	-1.761328963
M14610	7A	108785756	0.034997816	0.432989691	99	0.052954189	0.100647889	0.06972301	-1.508078915
M6935	3B	453510124	0.03523538	0.134020619	99	0.052954189	0.100520882	0.069001052	1.379195275
M13937	6D	24914334	0.035245736	0.402061856	99	0.052954189	0.100515366	0.070182243	-1.589829598
M11713	5B	0	0.035259172	0.360824742	99	0.052954189	0.100508213	0.069014239	1.381553365
M14389	7A	29550908	0.035282612	0.494845361	99	0.052954189	0.10049574	0.067666792	1.139813786
M5220	2B	0	0.035444946	0.474226804	99	0.052954189	0.100409598	0.06718991	-1.053874844
M6181	3A	247647485	0.035608385	0.402061856	99	0.052954189	0.100323294	0.071315468	-1.79080255
M5861	2D	606625652	0.035626695	0.402061856	99	0.052954189	0.100313652	0.070168529	-1.587390963
M14180	7A	8931917	0.035671659	0.103092784	99	0.052954189	0.100289996	0.069731397	-1.509573576
M1905	1B	676717313	0.035734992	0.432989691	99	0.052954189	0.100256729	0.067342647	-1.081421765
M12547	6A	517418179	0.035845292	0.463917526	99	0.052954189	0.100198942	0.068695983	1.324599567
M10650	5B	8959204	0.035883813	0.288659794	99	0.052954189	0.100178805	0.070202809	1.593486571
M3847	2B	78508701	0.03598505	0.422680412	99	0.052954189	0.100125993	0.067684091	-1.14292741
M11573	5B	596581143	0.036004847	0.443298969	99	0.052954189	0.100115684	0.068617505	-1.310541881
M774	1B	89404769	0.036130411	0.237113402	99	0.052954189	0.100050439	0.070999175	-1.734816995
M15038	7A	720347008	0.036137889	0.391752577	99	0.052954189	0.100046561	0.073165934	2.116702943
M59	1A	150793813	0.036151404	0.278350515	99	0.052954189	0.100039554	0.067866546	1.175751457
M12145	6A	8803926	0.036176756	0.350515464	99	0.052954189	0.100026418	0.080061039	3.307661903
M1323	1B	30723633	0.036196237	0.453608247	99	0.052954189	0.100016331	0.069964002	1.551001572
M11556	5B	625701808	0.03623458	0.237113402	99	0.052954189	0.099996494	0.067945249	-1.189901136
M11860	5B	703899766	0.036406686	0.216494845	99	0.052954189	0.099907728	0.07134517	1.796055643
M4291	2B	143000173	0.036758832	0.443298969	99	0.052954189	0.099727491	0.070030067	-1.562759656
M12940	6A	615815024	0.036761359	0.134020619	99	0.052954189	0.099726204	0.0692425	1.422348354
M12647	6A	592875661	0.036774661	0.463917526	99	0.052954189	0.099719433	0.070436369	-1.63499137
M8626	4A	127984252	0.03682873	0.432989691	99	0.052954189	0.099691935	0.069772954	-1.516978528
M15241	7B	81639841	0.036895934	0.381443299	99	0.052954189	0.099657816	0.067774953	1.159277429
M8864	4A	12656052	0.036919451	0.391752577	99	0.052954189	0.099645892	0.074704799	-2.385636895
M8927	4A	659678759	0.036919451	0.391752577	99	0.052954189	0.099645892	0.074704799	-2.385636895
M11797	5B	688707924	0.036936537	0.453608247	99	0.052954189	0.099637235	0.070887617	1.715050898
M9997	5A	69102517	0.037174901	0.371134021	99	0.052954189	0.099516894	0.06985559	1.531698662
M8723	4A	36222671	0.037179192	0.226804124	99	0.052954189	0.099514735	0.07023432	-1.599088822
M7480	3B	375425307	0.037249931	0.092783505	99	0.052954189	0.099479185	0.071592903	1.839841908
M5339	2B	22348080	0.037322098	0.288659794	99	0.052954189	0.09944299	0.071206713	-1.771561738
M14325	7A	19549420	0.037378483	0.381443299	99	0.052954189	0.099414763	0.072465413	1.993655383
M1420	1B	221737181	0.037384305	0.412371134	99	0.052954189	0.099411851	0.07035075	1.619781721
M10333	5A	564814321	0.037515332	0.18556701	99	0.052954189	0.099346443	0.069290441	-1.430910647
M13995	6D	156753575	0.037541694	0.257731959	99	0.052954189	0.099333313	0.071167392	-1.764602683
M11572	5B	583744955	0.037557194	0.18556701	99	0.052954189	0.099325597	0.068297591	1.253180608
M10367	5A	689204261	0.037583931	0.257731959	99	0.052954189	0.099312296	0.067783784	-1.160866108
M3596	2B	506395762	0.037656993	0.092783505	99	0.052954189	0.099276	0.069473715	1.463625469
M1535	1B	572148431	0.037666251	0.051546392	99	0.052954189	0.099271406	0.073073091	-2.100417557
M6816	3A	547714720	0.03767403	0.391752577	99	0.052954189	0.099267547	0.072353553	-1.973970499
M7756	3B	696333012	0.037724045	0.412371134	99	0.052954189	0.099242756	0.06838502	1.268865696
M10222	5A	503872534	0.037787252	0.041237113	99	0.052954189	0.099211476	0.07253036	-2.005080151
M2959	2A	692939894	0.037875941	0.340206186	99	0.052954189	0.099167679	0.068677616	1.321309892
M7337	3B	0	0.037902989	0.422680412	99	0.052954189	0.099154344	0.068242895	1.243364543
M2386	2A	0	0.038055312	0.484536082	99	0.052954189	0.099079435	0.075028209	2.441920795
M2725	2A	0	0.038055312	0.484536082	99	0.052954189	0.099079435	0.075028209	2.441920795
M10787	5B	208728682	0.038170357	0.402061856	99	0.052954189	0.09902307	0.068694696	-1.324369033
M11410	5B	429304228	0.038191108	0.463917526	99	0.052954189	0.099012923	0.069133681	1.402905664
M9311	4A	0	0.038221677	0.309278351	99	0.052954189	0.098997985	0.069222512	1.418777881
M2460	2A	15960621	0.038437837	0.164948454	99	0.052954189	0.09889272	0.074350045	2.323804798
M2480	2A	17830049	0.038437837	0.164948454	99	0.052954189	0.09889272	0.074350045	2.323804798
M2275	1D	676009151	0.038464032	0.154639175	99	0.052954189	0.098880006	0.069550281	-1.477284149
M8863	4A	12656052	0.03854952	0.391752577	99	0.052954189	0.09883858	0.071941062	-1.90129289
M11858	5B	703899766	0.038572442	0.371134021	99	0.052954189	0.098827489	0.069900101	-1.539625176
M9651	4B	662396344	0.038579206	0.463917526	99	0.052954189	0.098824217	0.069696585	1.503369439
M11694	5B	0	0.038579436	0.06185567	99	0.052954189	0.098824106	0.07340059	-2.157832733
M8407	3D	349870568	0.038585111	0.453608247	99	0.052954189	0.098821362	0.068923797	-1.365377151
M7189	3B	692937796	0.038684404	0.329896907	99	0.052954189	0.098773416	0.068204511	1.236474356
M7687	3B	0	0.038693763	0.443298969	99	0.052954189	0.098768903	0.070130919	-1.580701947
M5788	2D	0	0.038697233	0.144329897	99	0.052954189	0.098767231	0.06844192	-1.279070135
M5787	2D	0	0.03887267	0.381443299	99	0.052954189	0.098682866	0.068144799	1.22575302
M7161	3B	28279863	0.038872948	0.030927835	99	0.052954189	0.098682733	0.07665725	2.724207302
M7315	3B	55092506	0.038872948	0.030927835	99	0.052954189	0.098682733	0.07665725	2.724207302
M7693	3B	684619731	0.0389487	0.288659794	99	0.052954189	0.098646431	0.070085856	-1.57268601
M2516	2A	261223513	0.039158586	0.237113402	99	0.052954189	0.098546242	0.069569172	-1.480653332
M5089	2B	770053999	0.039248589	0.288659794	99	0.052954189	0.098503455	0.068905381	-1.362082537
M231	1A	261892580	0.039278075	0.412371134	99	0.052954189	0.09848946	0.067880434	-1.178248604
M8467	3D	689501546	0.039400426	0.164948454	99	0.052954189	0.098431508	0.069516288	-1.471220741
M8706	4A	25985745	0.03952485	0.051546392	99	0.052954189	0.098372772	0.072750546	-2.043787064
M5525	2D	66312323	0.03956252	0.391752577	99	0.052954189	0.098355028	0.068897031	-1.360588507
M1726	1B	636134239	0.039719903	0.113402062	99	0.052954189	0.09828109	0.069533343	1.474262974
M3613	2B	26497203	0.039838926	0.432989691	99	0.052954189	0.098225381	0.068954868	-1.370935318
M344	1A	490414155	0.039891718	0.092783505	99	0.052954189	0.098200729	0.072361953	-1.975448963
M8332	3D	33388803	0.039926647	0.340206186	99	0.052954189	0.098184437	0.06836146	1.264639639
M5795	2D	744685545	0.039941006	0.350515464	99	0.052954189	0.098177744	0.080162269	-3.324885949
M3825	2B	587422326	0.039981696	0.237113402	99	0.052954189	0.098158791	0.068075672	-1.213337395
M13916	6D	12018140	0.04005259	0.257731959	99	0.052954189	0.09812582	0.071750189	-1.867615638
M4328	2B	145518027	0.040355135	0.195876289	99	0.052954189	0.097985809	0.068609033	-1.309024012
M8339	3D	37969599	0.040530119	0.422680412	99	0.052954189	0.097905341	0.067385765	1.089194496
M2645	2A	95654544	0.040598894	0.412371134	99	0.052954189	0.097873816	0.070901285	-1.717473189
M14658	7A	171438913	0.040813751	0.154639175	99	0.052954189	0.097775697	0.068877139	1.357029258
M14168	7A	8934681	0.040835785	0.103092784	99	0.052954189	0.097765666	0.069546788	1.476661087
M7131	3B	24940760	0.040836794	0.144329897	99	0.052954189	0.097765206	0.068824609	1.347628526
M9135	4A	432988616	0.040922447	0.422680412	99	0.052954189	0.097726268	0.071421672	1.809582726
M9417	4A	740144144	0.040972562	0.18556701	99	0.052954189	0.097703526	0.070632853	-1.669872197
M9106	4A	694752853	0.040979323	0.237113402	99	0.052954189	0.09770046	0.068434482	-1.277736368
M6890	3B	43544653	0.040994943	0.06185567	99	0.052954189	0.097693379	0.072413018	-1.984436304
M4387	2B	545940419	0.041002547	0.422680412	99	0.052954189	0.097689933	0.067810335	1.165642034
M2950	2A	549728944	0.041037871	0.463917526	99	0.052954189	0.097673934	0.066949535	1.010479972
M5930	2D	619962487	0.041148502	0.463917526	99	0.052954189	0.09762392	0.068978973	1.375246761
M1760	1B	639426236	0.041332205	0.381443299	99	0.052954189	0.097541188	0.069551891	-1.477571169
M1996	1D	8818793	0.041562456	0.371134021	99	0.052954189	0.097438047	0.06861783	1.310599998
M12920	6A	0	0.041593974	0.268041237	99	0.052954189	0.097423976	0.069267974	1.426898301
M9621	4B	645297932	0.041747156	0.216494845	99	0.052954189	0.097355752	0.068735262	-1.331633464
M9758	4D	336833285	0.041823147	0.402061856	99	0.052954189	0.097322006	0.069908964	1.54120328
M9907	5A	36021495	0.041913564	0.484536082	99	0.052954189	0.097281939	0.067279072	-1.069958169
M12806	6A	689032602	0.041923332	0.309278351	99	0.052954189	0.097277616	0.07199218	1.910306969
M875	1B	47925443	0.041955558	0.268041237	99	0.052954189	0.097263361	0.070836513	1.705992588
M11486	5B	197611596	0.041962622	0.144329897	99	0.052954189	0.097260239	0.068789661	1.341372922
M11474	5B	549562653	0.042011601	0.360824742	99	0.052954189	0.0972386	0.076840312	-2.75580351
M1412	1B	0	0.04221575	0.340206186	99	0.052954189	0.097148698	0.068318213	-1.256880902
M2133	1D	537657357	0.04228752	0.18556701	99	0.052954189	0.097117203	0.071953874	-1.903552256
M13528	6B	29569629	0.04238361	0.06185567	99	0.052954189	0.097075125	0.073898631	-2.244982742
M1225	1B	18242916	0.042388781	0.432989691	99	0.052954189	0.097072864	0.06856433	-1.301013653
M8642	4A	232157833	0.042464101	0.257731959	99	0.052954189	0.097039956	0.068583324	-1.304417384
M10160	5A	446652509	0.042474399	0.494845361	99	0.052954189	0.097035462	0.070197886	1.592611213
M19	1A	1669927	0.042529156	0.216494845	99	0.052954189	0.097011584	0.067975622	1.195360264
M2219	1D	438024561	0.042590946	0.206185567	99	0.052954189	0.096984679	0.069566205	-1.480124228
M1256	1B	510601562	0.042619744	0.164948454	99	0.052954189	0.096972153	0.06975266	1.513362526
M2659	2A	117369587	0.042731425	0.309278351	99	0.052954189	0.096923665	0.069785474	1.519209099
M10859	5B	398970101	0.042814492	0.340206186	99	0.052954189	0.096887688	0.086771466	-4.434282862
M7128	3B	7607466	0.042814492	0.340206186	99	0.052954189	0.096887688	0.086771466	-4.434282862
M6613	3A	681466014	0.042928073	0.484536082	99	0.052954189	0.096838615	0.069678087	-1.500072282
M14575	7A	82950722	0.042988053	0.474226804	99	0.052954189	0.096812757	0.068321683	-1.257503482
M12056	6A	1338546	0.043090184	0.18556701	99	0.052954189	0.096768815	0.068525562	1.294065453
M11045	5B	419031153	0.043091932	0.494845361	99	0.052954189	0.096768064	0.068621941	1.311336606
M6095	3A	140700735	0.043160088	0.402061856	99	0.052954189	0.096738803	0.068619016	-1.310812535
M9855	5A	23011096	0.043183947	0.309278351	99	0.052954189	0.096728572	0.068005362	-1.200704988
M4457	2B	648436473	0.043203156	0.268041237	99	0.052954189	0.096720339	0.073697633	2.209834593
M5053	2B	0	0.043250799	0.443298969	99	0.052954189	0.096699936	0.067739417	1.152883748
M11820	5B	212365503	0.043514318	0.309278351	99	0.052954189	0.096587519	0.068577113	-1.303304363
M13857	6D	1372781	0.043613454	0.412371134	99	0.052954189	0.096545416	0.068294911	-1.252699732
M8334	3D	38010250	0.043615517	0.288659794	99	0.052954189	0.096544541	0.067628125	-1.132853083
M4394	2B	561223406	0.043695965	0.24742268	99	0.052954189	0.096510452	0.068409444	1.273246153
M4238	2B	693041722	0.043836115	0.371134021	99	0.052954189	0.096451224	0.067615099	-1.130508045
M252	1A	295187171	0.043911815	0.453608247	99	0.052954189	0.096419318	0.069086239	1.394426096
M5441	2D	58740235	0.044013511	0.278350515	99	0.052954189	0.096376547	0.068352306	1.262997476
M8954	4A	648906704	0.044080972	0.12371134	99	0.052954189	0.096348233	0.069045269	1.387101808
M3073	2A	735763589	0.044081023	0.474226804	99	0.052954189	0.096348212	0.068428246	-1.276618077
M10029	5A	439550987	0.044103888	0.494845361	99	0.052954189	0.096338626	0.06709961	-1.037579058
M2435	2A	276508725	0.044134629	0.474226804	99	0.052954189	0.096325746	0.077071915	2.795741716
M2657	2A	102050097	0.044134629	0.474226804	99	0.052954189	0.096325746	0.077071915	-2.795741716
M8495	3D	596995100	0.044178247	0.494845361	99	0.052954189	0.096307487	0.068151142	-1.226892065
M4390	2B	704788049	0.044221718	0.226804124	99	0.052954189	0.09628931	0.067890254	1.180014377
M10853	5B	126862058	0.044229191	0.360824742	99	0.052954189	0.096286187	0.074976627	2.432949212
M8069	3B	788195824	0.044334378	0.12371134	99	0.052954189	0.09624229	0.069762204	-1.515063088
M11113	5B	531194944	0.044506852	0.381443299	99	0.052954189	0.096170552	0.073149881	-2.113887661
M9684	4B	665957105	0.044588279	0.134020619	99	0.052954189	0.096136787	0.068889873	1.359307842
M1424	1B	418720052	0.044720756	0.350515464	99	0.052954189	0.096081995	0.0668503	-0.992549818
M1335	1B	366877298	0.04486728	0.175257732	99	0.052954189	0.096021596	0.068229119	1.240891709
M3732	2B	732708108	0.044896618	0.257731959	99	0.052954189	0.096009528	0.067637636	-1.134565386
M8125	3B	597096465	0.045074522	0.206185567	99	0.052954189	0.095936527	0.068143075	1.225443369
M9942	5A	52738363	0.045115582	0.030927835	99	0.052954189	0.095919723	0.075958929	-2.603446883
M12255	6A	340495895	0.045196734	0.474226804	99	0.052954189	0.095886558	0.067940132	1.18898134
M6144	3A	20335431	0.045253536	0.257731959	99	0.052954189	0.095863382	0.067200428	1.055772481
M4218	2B	34735773	0.045375975	0.164948454	99	0.052954189	0.095813532	0.069939766	-1.546687273
M2193	1D	421863618	0.0454013	0.164948454	99	0.052954189	0.095803239	0.074531433	2.355432297
M2167	1D	423928525	0.045417587	0.371134021	99	0.052954189	0.095796623	0.073749063	-2.218831142
M4567	2B	545270114	0.045686115	0.453608247	99	0.052954189	0.095687904	0.067563784	-1.121267929
M3870	2B	106962921	0.045708207	0.175257732	99	0.052954189	0.09567899	0.069027994	1.384013034
M8474	3D	568368420	0.045801238	0.030927835	99	0.052954189	0.095641504	0.075721992	2.562389445
M2358	2A	15637364	0.045804172	0.144329897	99	0.052954189	0.095640323	0.073173774	-2.118077868
M3979	2B	218209754	0.04583584	0.340206186	99	0.052954189	0.095627582	0.075808523	2.577388919
M10716	5B	75319717	0.045910112	0.226804124	99	0.052954189	0.095597737	0.067711673	1.147891311
M12554	6A	39131835	0.046022045	0.443298969	99	0.052954189	0.095552857	0.070730533	1.687200661
M12571	6A	382728399	0.046022045	0.443298969	99	0.052954189	0.095552857	0.070730533	1.687200661
M3883	2B	133979532	0.046022122	0.360824742	99	0.052954189	0.095552826	0.067210332	1.057559395
M1284	1B	392145668	0.04603822	0.257731959	99	0.052954189	0.095546381	0.0687044	1.326106841
M3067	2A	642784267	0.046048499	0.494845361	99	0.052954189	0.095542267	0.067693443	-1.144610516
M8613	4A	475428443	0.046105983	0.226804124	99	0.052954189	0.095519278	0.069424331	1.454813026
M13865	6D	360642174	0.046125068	0.257731959	99	0.052954189	0.095511652	0.070602746	-1.664529527
M15580	7B	647131014	0.046149404	0.06185567	99	0.052954189	0.095501934	0.07124294	-1.777972051
M9476	4B	134824702	0.046189732	0.041237113	99	0.052954189	0.09548584	0.074552817	2.359159122
M12811	6A	696921778	0.046203812	0.309278351	99	0.052954189	0.095480225	0.068849026	1.351998542
M12734	6A	594854466	0.046294313	0.319587629	99	0.052954189	0.095444176	0.067782032	1.1605509
M14661	7A	134621823	0.046415399	0.298969072	99	0.052954189	0.095396062	0.071359238	-1.798543618
M8627	4A	428572127	0.046698943	0.453608247	99	0.052954189	0.09528392	0.068066607	-1.211708925
M3615	2B	48138841	0.046751073	0.391752577	99	0.052954189	0.095263383	0.068754097	-1.335005836
M9356	4A	613388524	0.046777981	0.340206186	99	0.052954189	0.095252791	0.085159112	4.166315828
M6303	3A	56948590	0.046777981	0.340206186	99	0.052954189	0.095252791	0.085159112	-4.166315828
M8220	3B	825858484	0.046807208	0.103092784	99	0.052954189	0.095241294	0.070039715	-1.564476552
M12713	6A	583292509	0.046895101	0.494845361	99	0.052954189	0.095206767	0.068377549	-1.267525606
M9598	4B	581078619	0.047063709	0.175257732	99	0.052954189	0.095140725	0.069421843	1.454369011
M7767	3B	13505175	0.047108318	0.206185567	99	0.052954189	0.095123295	0.067890396	-1.180039885
M11742	5B	0	0.047111859	0.216494845	99	0.052954189	0.095121912	0.067481259	1.106402996
M11663	5B	0	0.047168213	0.494845361	99	0.052954189	0.09509992	0.069551766	-1.47754896
M3219	2A	0	0.047299033	0.103092784	99	0.052954189	0.095048976	0.070535145	1.65253061
M1243	1B	89236847	0.04730916	0.329896907	99	0.052954189	0.095045038	0.073048511	-2.096104846
M6915	3B	0	0.047686405	0.257731959	99	0.052954189	0.094899006	0.069315575	-1.435398785
M1338	1B	380472532	0.047753177	0.402061856	99	0.052954189	0.094873288	0.067991672	1.198244861
M8167	3B	815300848	0.04781841	0.06185567	99	0.052954189	0.094848199	0.072207723	-1.948292185
M2363	2A	125507642	0.04793143	0.309278351	99	0.052954189	0.09480482	0.068441521	1.27899855
M14883	7A	674759987	0.048000818	0.453608247	99	0.052954189	0.094778241	0.068974587	1.374462255
M3505	2B	24887527	0.048040942	0.422680412	99	0.052954189	0.094762891	0.067405662	-1.092780587
M4955	2B	762916610	0.048224735	0.381443299	99	0.052954189	0.094692752	0.07573184	2.564096769
M12663	6A	543972128	0.048234452	0.329896907	99	0.052954189	0.094689052	0.068147004	1.226149078
M5640	2D	593898542	0.04827236	0.381443299	99	0.052954189	0.094674624	0.06718361	1.052738159
M13020	6B	3926040	0.048324499	0.206185567	99	0.052954189	0.0946548	0.068714334	1.327885947
M11849	5B	697572910	0.048381224	0.206185567	99	0.052954189	0.094633259	0.070423444	1.632695709
M14892	7A	680154265	0.048450572	0.402061856	99	0.052954189	0.09460696	0.068992938	1.377744291
M21	1A	2276875	0.048578484	0.391752577	99	0.052954189	0.09455856	0.068191854	1.234202023
M4554	2B	632566016	0.048603639	0.463917526	99	0.052954189	0.094549057	0.069738414	1.510824033
M13730	6B	708271328	0.048826946	0.319587629	99	0.052954189	0.094464933	0.068567762	-1.301628661
M3137	2A	0	0.04888307	0.422680412	99	0.052954189	0.094443855	0.067261601	-1.066807399
M6516	3A	481213917	0.048944269	0.371134021	99	0.052954189	0.094420901	0.067126883	-1.042501579
M448	1A	532487758	0.049216318	0.432989691	99	0.052954189	0.094319234	0.069152903	-1.406340862
M8641	4A	232157833	0.049227827	0.484536082	99	0.052954189	0.094314946	0.069019064	-1.38241617
M9982	5A	59566378	0.049475845	0.484536082	99	0.052954189	0.094222808	0.068966278	-1.372976057
M4073	2B	236592763	0.049541897	0.24742268	99	0.052954189	0.094198353	0.070013475	1.559807005
M7157	3B	27995650	0.04962418	0.443298969	99	0.052954189	0.094167938	0.066224654	0.87930127
M5649	2D	744783890	0.049624793	0.144329897	99	0.052954189	0.094167712	0.068903205	1.361693132
M542	1A	123811534	0.049701154	0.432989691	99	0.052954189	0.094139535	0.068062154	1.210909007
M2091	1D	612756863	0.049735701	0.226804124	99	0.052954189	0.094126802	0.070766255	1.693535736
M11048	5B	94028326	0.049747732	0.164948454	99	0.052954189	0.09412237	0.068618258	1.310676764
M11702	5B	634081712	0.049755642	0.340206186	99	0.052954189	0.094119457	0.066603084	-0.947843565
M14265	7A	11415890	0.049958788	0.113402062	99	0.052954189	0.094044811	0.0694856	1.465745847
M7800	3B	729922064	0.049978646	0.257731959	99	0.052954189	0.094037531	0.067543572	-1.117627655
M5016	2B	765461493	0.049996695	0.268041237	99	0.052954189	0.094030918	0.068397247	-1.271058626
M9624	4B	0	0.050012723	0.319587629	99	0.052954189	0.094025047	0.068516744	-1.292484787
M5161	2B	381376204	0.050100235	0.298969072	99	0.052954189	0.093993028	0.067909153	1.183412296
M10926	5B	557361423	0.050106631	0.402061856	99	0.052954189	0.09399069	0.068206106	-1.236760607
M766	1B	3569552	0.050366556	0.494845361	99	0.052954189	0.093895955	0.067641795	1.135314057
M10416	5A	577226879	0.050398683	0.164948454	99	0.052954189	0.093884283	0.068602101	-1.307781847
M2018	1D	364841500	0.050454848	0.432989691	99	0.052954189	0.093863895	0.067619211	-1.131248373
M2080	1D	40222148	0.050468151	0.360824742	99	0.052954189	0.09385907	0.068932583	-1.366948859
M12276	6A	605931995	0.05046831	0.041237113	99	0.052954189	0.093859012	0.072246462	-1.955115147
M7685	3B	16104988	0.050538307	0.257731959	99	0.052954189	0.093833646	0.07057546	-1.659686763
M15013	7A	704330351	0.050582583	0.226804124	99	0.052954189	0.09381762	0.068734503	-1.331497604
M8084	3B	49383194	0.050582724	0.082474227	99	0.052954189	0.093817568	0.070732398	-1.687531518
M9617	4B	643534047	0.050584087	0.494845361	99	0.052954189	0.093817076	0.069978247	-1.553537288
M10855	5B	536909476	0.050593704	0.412371134	99	0.052954189	0.093813596	0.070305236	1.611694043
M12968	6B	8782571	0.050612032	0.226804124	99	0.052954189	0.093806968	0.068914368	1.36369024
M5626	2D	568465158	0.050676353	0.422680412	99	0.052954189	0.093783728	0.070232664	1.598794534
M7501	3B	392957146	0.05068625	0.051546392	99	0.052954189	0.093780155	0.072989262	2.085707423
M10813	5B	412452755	0.050714776	0.443298969	99	0.052954189	0.093769861	0.070180408	-1.589503338
M2076	1D	41868233	0.050820815	0.268041237	99	0.052954189	0.093731648	0.069120792	-1.400602128
M11546	5B	461255726	0.050862691	0.268041237	99	0.052954189	0.09371658	0.06707467	1.033077016
M3605	2B	163007189	0.050976283	0.422680412	99	0.052954189	0.093675777	0.066415441	0.91387337
M15522	7B	400828319	0.051000157	0.422680412	99	0.052954189	0.093667213	0.069084833	1.394174881
M1428	1B	18359071	0.051130292	0.144329897	99	0.052954189	0.093620611	0.073432041	-2.163341914
M8630	4A	111053755	0.051135462	0.020618557	99	0.052954189	0.093618762	0.078169117	-2.984405496
M8694	4A	340554154	0.051135462	0.020618557	99	0.052954189	0.093618762	0.078169117	-2.984405496
M8698	4A	326976519	0.051135462	0.020618557	99	0.052954189	0.093618762	0.078169117	-2.984405496
M4982	2B	760132062	0.051135462	0.020618557	99	0.052954189	0.093618762	0.078169117	2.984405496
M8712	4A	584046320	0.051135462	0.020618557	99	0.052954189	0.093618762	0.078169117	2.984405496
M61	1A	4497727	0.051175853	0.082474227	99	0.052954189	0.093604325	0.069819733	1.52531215
M3413	2B	6525683	0.051175925	0.453608247	99	0.052954189	0.093604299	0.068258524	-1.24616968
M10756	5B	383209422	0.051204099	0.154639175	99	0.052954189	0.093594236	0.068693873	-1.324221598
M9222	4A	720689979	0.051211672	0.278350515	99	0.052954189	0.093591533	0.066944593	1.009587271
M6771	3A	0	0.051311301	0.154639175	99	0.052954189	0.093556001	0.069076349	-1.392658224
M6319	3A	434822187	0.051335893	0.216494845	99	0.052954189	0.093547242	0.068313626	-1.25605773
M11678	5B	617600683	0.051433063	0.422680412	99	0.052954189	0.093512677	0.068525952	1.294135319
M3889	2B	110963593	0.051472247	0.453608247	99	0.052954189	0.093498759	0.066698939	-0.965184335
M11875	5B	707477330	0.051567408	0.195876289	99	0.052954189	0.093465004	0.068814951	1.345899837
M9131	4A	236257089	0.051661643	0.051546392	99	0.052954189	0.093431644	0.073009418	-2.089244905
M4698	2B	594098170	0.051668175	0.402061856	99	0.052954189	0.093429334	0.069049529	-1.387863488
M12132	6A	5480626	0.051738468	0.237113402	99	0.052954189	0.093404496	0.068543198	-1.297226444
M14334	7A	17153068	0.051776792	0.103092784	99	0.052954189	0.093390969	0.069601733	1.486459823
M2616	2A	0	0.051887632	0.309278351	99	0.052954189	0.093351908	0.068216652	1.238653821
M15428	7B	539790379	0.051987617	0.030927835	99	0.052954189	0.093316749	0.075138826	2.461153222
M10506	5A	681463909	0.052268103	0.371134021	99	0.052954189	0.093218506	0.071192939	1.76912416
M12078	6A	4290482	0.052287504	0.030927835	99	0.052954189	0.093211732	0.077431232	-2.857624168
M3462	2B	8479321	0.052365523	0.474226804	99	0.052954189	0.093184517	0.066595152	0.946408118
M259	1A	387811947	0.052380726	0.319587629	99	0.052954189	0.093179219	0.082032474	-3.641806526
M4542	2B	673051085	0.05247354	0.371134021	99	0.052954189	0.09314691	0.073357469	-2.150277935
M13061	6B	15357875	0.052509149	0.381443299	99	0.052954189	0.09313453	0.067682463	-1.142634355
M773	1B	89404769	0.052602774	0.195876289	99	0.052954189	0.093102025	0.068313625	1.256057608
M537	1A	469979060	0.052764362	0.360824742	99	0.052954189	0.09304607	0.066628121	0.952373635
M11994	5D	548685020	0.052833336	0.453608247	99	0.052954189	0.093022242	0.06666553	-0.95914147
M1521	1B	562563460	0.052923176	0.463917526	99	0.052954189	0.092991255	0.066641856	-0.954858608
M4717	2B	717090293	0.052923929	0.432989691	99	0.052954189	0.092990996	0.071352846	-1.797413095
M11408	5B	429304228	0.052929907	0.06185567	99	0.052954189	0.092988936	0.071492928	1.822177592
M2751	2A	475582233	0.053012672	0.226804124	99	0.052954189	0.092960444	0.069053618	-1.388594484
M13883	6D	6343670	0.053103286	0.422680412	99	0.052954189	0.092929304	0.071150495	-1.761611751
M3659	2B	33241377	0.05312834	0.412371134	99	0.052954189	0.092920705	0.072035014	1.917858701
M3587	2B	25050436	0.053131295	0.463917526	99	0.052954189	0.092919691	0.066707749	0.966777827
M5809	2D	580117384	0.053217475	0.092783505	99	0.052954189	0.092890145	0.070369985	-1.623199252
M11066	5B	545913052	0.053381815	0.484536082	99	0.052954189	0.092833945	0.067744548	-1.153807088
M15528	7B	531935983	0.053394762	0.18556701	99	0.052954189	0.092829526	0.069697643	-1.503558045
M4340	2B	422190933	0.053417709	0.164948454	99	0.052954189	0.092821696	0.067923512	-1.185993592
M6186	3A	320920365	0.053421804	0.402061856	99	0.052954189	0.092820298	0.071354815	-1.797761332
M9545	4B	526943141	0.053441594	0.329896907	99	0.052954189	0.092813549	0.069016441	-1.381947191
M7719	3B	284044674	0.053662193	0.453608247	99	0.052954189	0.092738494	0.066414088	-0.913628219
M2764	2A	489635273	0.053694979	0.371134021	99	0.052954189	0.092727367	0.068510119	-1.291297215
M12074	6A	1852832	0.05373621	0.195876289	99	0.052954189	0.092713385	0.068721204	1.329116138
M14941	7A	701052545	0.053755365	0.422680412	99	0.052954189	0.092706893	0.066937557	-1.008316223
M2038	1D	25443095	0.053798778	0.288659794	99	0.052954189	0.092692189	0.069950035	-1.548515347
M5632	2D	611215180	0.054008991	0.474226804	99	0.052954189	0.09262117	0.066825463	0.988060767
M246	1A	293594276	0.054164866	0.020618557	99	0.052954189	0.092568701	0.078319759	3.010239125
M4902	2B	751843230	0.054164866	0.020618557	99	0.052954189	0.092568701	0.078319759	3.010239125
M7621	3B	580521251	0.054164866	0.020618557	99	0.052954189	0.092568701	0.078319759	3.010239125
M15015	7A	713138041	0.054164866	0.020618557	99	0.052954189	0.092568701	0.078319759	-3.010239125
M9906	5A	34323774	0.054164866	0.020618557	99	0.052954189	0.092568701	0.078319759	-3.010239125
M5655	2D	142549111	0.054230116	0.340206186	99	0.052954189	0.092546786	0.068688747	1.323303507
M998	1B	41982366	0.054261874	0.154639175	99	0.052954189	0.09253613	0.068080345	-1.21417689
M12945	6A	468839603	0.054266968	0.381443299	99	0.052954189	0.092534421	0.069943935	1.547429364
M7686	3B	16104988	0.054287093	0.237113402	99	0.052954189	0.092527673	0.067386434	1.089314978
M9350	4A	738890239	0.054313964	0.18556701	99	0.052954189	0.092518666	0.070022168	1.561354044
M2375	2A	10373140	0.054404938	0.474226804	99	0.052954189	0.092488209	0.068815071	-1.345921367
M13918	6D	13169079	0.05441419	0.422680412	99	0.052954189	0.092485115	0.0678277	-1.168765438
M9922	5A	39746104	0.054416641	0.474226804	99	0.052954189	0.092484295	0.068213868	1.238154029
M508	1A	0	0.054447702	0.443298969	99	0.052954189	0.092473911	0.067942303	-1.189371638
M7513	3B	448772162	0.054573983	0.113402062	99	0.052954189	0.09243176	0.069290632	-1.430944793
M6923	3B	7302120	0.054762318	0.329896907	99	0.052954189	0.092369091	0.066997045	-1.019061017
M13825	6B	39775683	0.054792878	0.18556701	99	0.052954189	0.092358944	0.067505724	-1.110810405
M6311	3A	69361313	0.05481438	0.371134021	99	0.052954189	0.092351808	0.068676839	1.321170821
M8886	4A	631976712	0.054905995	0.484536082	99	0.052954189	0.092321439	0.067046098	1.027918703
M11725	5B	664683778	0.054986585	0.391752577	99	0.052954189	0.092294769	0.072427382	1.986964016
M11727	5B	665685766	0.054986585	0.391752577	99	0.052954189	0.092294769	0.072427382	1.986964016
M3356	2A	764231381	0.05500379	0.226804124	99	0.052954189	0.092289081	0.068217556	-1.238816202
M15371	7B	426526640	0.055007637	0.329896907	99	0.052954189	0.092287809	0.067126128	1.042365415
M11315	5B	433216045	0.05501746	0.010309278	99	0.052954189	0.092284562	0.085776036	-4.269044204
M8751	4A	0	0.05501746	0.010309278	99	0.052954189	0.092284562	0.085776036	-4.269044204
M11299	5B	261777240	0.05501746	0.010309278	99	0.052954189	0.092284562	0.085776036	4.269044204
M7166	3B	41426550	0.05501746	0.010309278	99	0.052954189	0.092284562	0.085776036	4.269044204
M44	1A	1674029	0.055168137	0.195876289	99	0.052954189	0.092234841	0.068511266	-1.291502791
M6120	3A	25417579	0.055175553	0.484536082	99	0.052954189	0.092232398	0.0677022	-1.146186566
M4319	2B	507351907	0.055240421	0.226804124	99	0.052954189	0.092211041	0.06851503	1.29217749
M11314	5B	422210751	0.055251128	0.082474227	99	0.052954189	0.092207518	0.070613419	-1.66642348
M236	1A	341122401	0.055450691	0.340206186	99	0.052954189	0.092141996	0.06859883	1.30719586
M9497	4B	455378553	0.055547184	0.134020619	99	0.052954189	0.092110406	0.069688003	-1.501839814
M1559	1B	685243263	0.05562474	0.371134021	99	0.052954189	0.092085059	0.069774414	-1.517238522
M13650	6B	693132833	0.055672418	0.463917526	99	0.052954189	0.092069495	0.066784154	-0.980593419
M11802	5B	769192822	0.055829209	0.154639175	99	0.052954189	0.092018415	0.070186458	1.590579122
M13846	6B	0	0.056021113	0.463917526	99	0.052954189	0.091956106	0.070300529	1.610857431
M14731	7A	516152042	0.056341633	0.206185567	99	0.052954189	0.091852549	0.068789707	-1.341381044
M279	1A	358151404	0.056363773	0.402061856	99	0.052954189	0.09184542	0.069761195	-1.514883402
M12100	6A	9798353	0.056468997	0.268041237	99	0.052954189	0.091811575	0.068325343	1.258160118
M2277	1D	486387816	0.056472549	0.371134021	99	0.052954189	0.091810434	0.067470048	-1.104383192
M2646	2A	95654544	0.05648622	0.072164948	99	0.052954189	0.091806042	0.071211815	-1.772464487
M5624	2D	490049382	0.056507532	0.113402062	99	0.052954189	0.091799198	0.069199465	1.414660482
M10865	5B	128642164	0.056517289	0.082474227	99	0.052954189	0.091796066	0.069923203	1.543738455
M9081	4A	691718505	0.056536629	0.350515464	99	0.052954189	0.091789858	0.067208633	1.057252779
M15253	7B	63002454	0.056595885	0.340206186	99	0.052954189	0.091770854	0.069017211	1.382084944
M4655	2B	707465009	0.056628866	0.412371134	99	0.052954189	0.091760286	0.071537077	1.82997913
M11057	5B	0	0.056672251	0.020618557	99	0.052954189	0.091746394	0.077525395	2.873825424
M14173	7A	8774175	0.056683853	0.443298969	99	0.052954189	0.091742681	0.068461443	-1.282570764
M939	1B	171130928	0.056713333	0.226804124	99	0.052954189	0.09173325	0.068565785	1.301274386
M10170	5A	496499995	0.056715695	0.360824742	99	0.052954189	0.091732495	0.066592812	-0.945984774
M7935	3B	758346322	0.056793937	0.24742268	99	0.052954189	0.091707491	0.067729815	1.151155981
M539	1A	701043681	0.056844527	0.412371134	99	0.052954189	0.091691344	0.068340418	1.260864807
M553	1A	623968684	0.056844527	0.412371134	99	0.052954189	0.091691344	0.068340418	1.260864807
M11695	5B	0	0.056949599	0.371134021	99	0.052954189	0.091657857	0.068581388	-1.304070418
M1880	1B	670160278	0.05695516	0.113402062	99	0.052954189	0.091656087	0.069869012	-1.53408906
M2157	1D	521259456	0.056989751	0.24742268	99	0.052954189	0.091645078	0.070481573	-1.643018994
M10833	5B	417804694	0.057042042	0.474226804	99	0.052954189	0.09162845	0.069063944	-1.390440629
M2066	1D	26257862	0.057137279	0.443298969	99	0.052954189	0.091598208	0.069759837	1.514641316
M14263	7A	0	0.057179747	0.422680412	99	0.052954189	0.091584741	0.067431558	1.097447539
M11361	5B	180679040	0.057271842	0.298969072	99	0.052954189	0.091555572	0.070504653	1.647117157
M9786	4D	571615679	0.057389843	0.484536082	99	0.052954189	0.091518272	0.067513307	-1.11217643
M8340	3D	37969599	0.057428703	0.092783505	99	0.052954189	0.091506006	0.069268296	-1.426955769
M7540	3B	513663423	0.057446002	0.288659794	99	0.052954189	0.091500549	0.06710981	1.039420224
M11736	5B	669217135	0.057455671	0.371134021	99	0.052954189	0.091497499	0.068526425	1.29422003
M1247	1B	433103147	0.057473011	0.309278351	99	0.052954189	0.091492032	0.069393488	-1.449308257
M540	1A	701043681	0.057487219	0.24742268	99	0.052954189	0.091487553	0.068061104	1.210720396
M12603	6A	532659325	0.057510526	0.494845361	99	0.052954189	0.091480209	0.068327802	-1.258601253
M14420	7A	34920067	0.057562478	0.164948454	99	0.052954189	0.091463851	0.07048656	-1.64390459
M5101	2B	0	0.057597922	0.381443299	99	0.052954189	0.091452699	0.067179508	1.051998049
M12129	6A	610761	0.05764772	0.216494845	99	0.052954189	0.091437044	0.068562307	-1.300651177
M12873	6A	610402677	0.057763475	0.474226804	99	0.052954189	0.091400711	0.067166442	-1.049640552
M12654	6A	467438683	0.057799588	0.432989691	99	0.052954189	0.091389392	0.066599602	0.947213392
M11821	5B	34137545	0.057817135	0.381443299	99	0.052954189	0.091383895	0.073053975	2.097063581
M15514	7B	611339700	0.057882366	0.494845361	99	0.052954189	0.091363475	0.069503299	1.468903497
M3083	2A	154349970	0.057997959	0.494845361	99	0.052954189	0.091327351	0.069286355	1.430181004
M3113	2A	747610057	0.058067705	0.453608247	99	0.052954189	0.091305592	0.067576697	1.123593357
M3152	2A	0	0.058201746	0.412371134	99	0.052954189	0.091263855	0.068115431	1.220478914
M2361	2A	125507642	0.058231128	0.268041237	99	0.052954189	0.09125472	0.069596572	-1.485539603
M5812	2D	588737228	0.058255386	0.278350515	99	0.052954189	0.091247181	0.068112998	1.220041957
M12215	6A	13672060	0.05825977	0.432989691	99	0.052954189	0.09124582	0.066957443	-1.011908355
M12611	6A	558795265	0.058278036	0.484536082	99	0.052954189	0.091240146	0.069432932	-1.456348079
M7970	3B	95564668	0.058281815	0.453608247	99	0.052954189	0.091238972	0.066659326	0.958019178
M27	1A	1238067	0.058304594	0.391752577	99	0.052954189	0.0912319	0.071236649	-1.776858895
M5563	2D	586893685	0.05833679	0.463917526	99	0.052954189	0.09122191	0.069248739	1.423462725
M3690	2B	69047995	0.058519394	0.494845361	99	0.052954189	0.091165359	0.067193803	1.054577296
M2555	2A	476666695	0.05856306	0.474226804	99	0.052954189	0.091151865	0.067276167	-1.069434391
M7723	3B	108853172	0.05864706	0.12371134	99	0.052954189	0.091125936	0.06794424	-1.189719709
M11748	5B	679675551	0.058704988	0.443298969	99	0.052954189	0.091108078	0.069513866	1.470788598
M13649	6B	693132833	0.058765555	0.175257732	99	0.052954189	0.091089427	0.06749047	1.108062351
M1300	1B	386267990	0.058864424	0.412371134	99	0.052954189	0.091059026	0.06897596	1.374707855
M796	1B	30846941	0.058875027	0.381443299	99	0.052954189	0.091055769	0.067426123	1.096468218
M7977	3B	762845618	0.05889893	0.216494845	99	0.052954189	0.091048429	0.067813036	-1.166127982
M9790	4D	469431667	0.058979517	0.494845361	99	0.052954189	0.091023706	0.067787774	-1.161583812
M3104	2A	744493388	0.05903997	0.237113402	99	0.052954189	0.091005184	0.067557677	1.120168006
M14314	7A	18681090	0.059079772	0.371134021	99	0.052954189	0.090993	0.069771082	1.516644902
M6304	3A	56948590	0.059088848	0.010309278	99	0.052954189	0.090990223	0.084293026	-4.02167799
M6301	3A	71537069	0.059088848	0.010309278	99	0.052954189	0.090990223	0.084293026	4.02167799
M14899	7A	693025273	0.059093019	0.257731959	99	0.052954189	0.090988947	0.06749367	-1.108638862
M7510	3B	485581903	0.059161405	0.278350515	99	0.052954189	0.090968039	0.069313041	1.434946363
M5621	2D	110910233	0.059169359	0.453608247	99	0.052954189	0.090965609	0.068911152	-1.363114943
M5652	2D	694059807	0.059200069	0.175257732	99	0.052954189	0.09095623	0.067631952	-1.133542155
M8887	4A	34990198	0.059258664	0.463917526	99	0.052954189	0.090938349	0.067686566	-1.143372983
M4608	2B	0	0.059511489	0.360824742	99	0.052954189	0.090861415	0.066985058	-1.016896178
M2313	1D	489968994	0.059551196	0.319587629	99	0.052954189	0.090849365	0.067583882	1.12488711
M15034	7A	0	0.059583014	0.268041237	99	0.052954189	0.090839715	0.067135119	-1.043988109
M12414	6A	48048270	0.059608131	0.402061856	99	0.052954189	0.090832101	0.06677252	-0.978490146
M11753	5B	678708672	0.059687359	0.371134021	99	0.052954189	0.090808107	0.074090607	-2.278523559
M11794	5B	656472011	0.059687359	0.371134021	99	0.052954189	0.090808107	0.074090607	-2.278523559
M11761	5B	681979338	0.059687359	0.371134021	99	0.052954189	0.090808107	0.074090607	2.278523559
M11787	5B	688224445	0.059687359	0.371134021	99	0.052954189	0.090808107	0.074090607	2.278523559
M5036	2B	767121912	0.059693074	0.432989691	99	0.052954189	0.090806378	0.067527748	1.114777573
M245	1A	293594276	0.059839765	0.360824742	99	0.052954189	0.090762048	0.074634336	2.37336329
M12513	6A	143013871	0.059976565	0.164948454	99	0.052954189	0.090720814	0.068524088	-1.293801158
M12517	6A	418539034	0.059976565	0.164948454	99	0.052954189	0.090720814	0.068524088	-1.293801158
M12083	6A	0	0.060003679	0.402061856	99	0.052954189	0.090712653	0.066890645	0.999840563
M10505	5A	681463909	0.060062765	0.391752577	99	0.052954189	0.090694883	0.067174209	-1.051042068
M12776	6A	251320214	0.060076335	0.432989691	99	0.052954189	0.090690805	0.066808234	-0.984946575
M7297	3B	67787098	0.060121511	0.175257732	99	0.052954189	0.090677235	0.068260042	1.246442028
M14209	7A	0	0.060141074	0.226804124	99	0.052954189	0.090671362	0.067941366	-1.18920311
M5393	2D	15857433	0.060203651	0.371134021	99	0.052954189	0.090652589	0.070104856	-1.576066024
M6187	3A	312266867	0.060210953	0.432989691	99	0.052954189	0.0906504	0.069684686	-1.501248552
M1565	1B	592833254	0.060345561	0.474226804	99	0.052954189	0.090610096	0.066349563	-0.901939464
M1587	1B	572257612	0.060380376	0.020618557	99	0.052954189	0.090599687	0.077041868	-2.790562512
M11504	5B	142781109	0.060431886	0.494845361	99	0.052954189	0.090584299	0.066347371	-0.901542303
M8020	3B	765843802	0.060484969	0.329896907	99	0.052954189	0.090568457	0.070839994	-1.70660978
M3278	2A	699803097	0.060511496	0.206185567	99	0.052954189	0.090560545	0.068304906	1.254493089
M1421	1B	531867322	0.060560774	0.360824742	99	0.052954189	0.090545858	0.066899376	-1.001418089
M13850	6B	715630902	0.060632708	0.432989691	99	0.052954189	0.090524442	0.071155676	1.76252886
M12840	6A	445051105	0.060877208	0.268041237	99	0.052954189	0.090451856	0.067511487	1.111848562
M8461	3D	150762205	0.060923185	0.360824742	99	0.052954189	0.090438242	0.074488653	-2.347975176
M8473	3D	568368420	0.060923185	0.360824742	99	0.052954189	0.090438242	0.074488653	2.347975176
M6697	3A	711287701	0.060999226	0.412371134	99	0.052954189	0.09041575	0.066921175	-1.005356711
M9781	4D	446124259	0.061053147	0.340206186	99	0.052954189	0.090399819	0.072130184	-1.934631741
M2128	1D	413406127	0.061070791	0.092783505	99	0.052954189	0.090394609	0.068933579	-1.36712714
M550	1A	42812462	0.061096776	0.237113402	99	0.052954189	0.090386939	0.068004057	-1.200470451
M14357	7A	20678507	0.061204963	0.268041237	99	0.052954189	0.090355046	0.069820675	1.52547991
M14501	7A	62750954	0.061307038	0.216494845	99	0.052954189	0.090325011	0.06733577	-1.080181842
M11519	5B	63585667	0.061350271	0.257731959	99	0.052954189	0.090312306	0.068357959	-1.264011505
M9171	4A	709851770	0.06148702	0.484536082	99	0.052954189	0.090272183	0.069802255	1.522198546
M3126	2A	751096174	0.061498899	0.030927835	99	0.052954189	0.090268702	0.074237349	2.3041417
M3890	2B	110963593	0.061662415	0.18556701	99	0.052954189	0.090220863	0.06829816	1.253282587
M7782	3B	722479438	0.061684982	0.206185567	99	0.052954189	0.090214271	0.067698796	-1.145573974
M5962	2D	128969280	0.061697459	0.329896907	99	0.052954189	0.090210628	0.067567396	1.12191828
M13932	6D	486917435	0.061785536	0.381443299	99	0.052954189	0.090184932	0.06925462	1.424513066
M7981	3B	763454895	0.061882721	0.350515464	99	0.052954189	0.090156625	0.078169753	-2.984514531
M339	1A	0	0.061882721	0.350515464	99	0.052954189	0.090156625	0.078169753	2.984514531
M7856	3B	755711290	0.061882721	0.350515464	99	0.052954189	0.090156625	0.078169753	2.984514531
M9894	5A	33931366	0.061882721	0.350515464	99	0.052954189	0.090156625	0.078169753	2.984514531
M1239	1B	488834383	0.061944809	0.329896907	99	0.052954189	0.090138566	0.070470853	1.641115415
M9524	4B	444886705	0.06194788	0.030927835	99	0.052954189	0.090137673	0.075125489	-2.458834881
M13909	6D	10760221	0.062031777	0.309278351	99	0.052954189	0.090113303	0.068942066	1.368645316
M13856	6D	2074536	0.062086593	0.216494845	99	0.052954189	0.090097399	0.069965741	1.551311137
M5902	2D	606129207	0.062121658	0.463917526	99	0.052954189	0.090087234	0.068812963	-1.345543991
M9514	4B	519477906	0.062148958	0.422680412	99	0.052954189	0.090079324	0.067044874	-1.027697653
M7500	3B	248342512	0.062223658	0.381443299	99	0.052954189	0.0900577	0.072292481	-1.963218782
M9565	4B	607638063	0.062264376	0.453608247	99	0.052954189	0.090045925	0.068679155	1.321585505
M6058	3A	8862385	0.062488344	0.24742268	99	0.052954189	0.089981304	0.066794824	0.98252236
M1307	1B	578521082	0.062520118	0.484536082	99	0.052954189	0.089972156	0.069833141	1.527700384
M7860	3B	559227303	0.062525276	0.18556701	99	0.052954189	0.089970672	0.067669605	1.140320089
M15262	7B	71271240	0.062580863	0.443298969	99	0.052954189	0.089954683	0.06913066	1.402365788
M1791	1B	608599570	0.062677389	0.164948454	99	0.052954189	0.089926954	0.068529487	1.294768967
M12836	6A	593442633	0.062705953	0.463917526	99	0.052954189	0.089918758	0.068161934	-1.228829981
M6222	3A	12741357	0.062736101	0.206185567	99	0.052954189	0.089910111	0.069378883	1.44670131
M11078	5B	502152339	0.062755431	0.24742268	99	0.052954189	0.089904569	0.06922335	-1.418927549
M12745	6A	609814795	0.062783678	0.494845361	99	0.052954189	0.089896475	0.067535282	-1.116134671
M2574	2A	71172019	0.062878282	0.381443299	99	0.052954189	0.089869393	0.068731937	-1.331038085
M9862	5A	14849690	0.062894851	0.494845361	99	0.052954189	0.089864654	0.069866454	-1.533633562
M10788	5B	208728682	0.062909791	0.206185567	99	0.052954189	0.089860383	0.066942863	1.009274615
M8649	4A	303362512	0.063090879	0.226804124	99	0.052954189	0.089808694	0.068035576	-1.206133943
M571	1A	559780847	0.063094649	0.175257732	99	0.052954189	0.08980762	0.067941273	-1.18918635
M3479	2B	0	0.063256275	0.443298969	99	0.052954189	0.089761626	0.070369889	-1.623182232
M7299	3B	19380506	0.063396246	0.010309278	99	0.052954189	0.089721897	0.079927522	-3.284933088
M6403	3A	512326769	0.063561832	0.360824742	99	0.052954189	0.08967502	0.074119204	2.283517348
M1708	1B	580578970	0.063590026	0.494845361	99	0.052954189	0.089667051	0.067031842	-1.025344619
M7766	3B	728080758	0.063689691	0.268041237	99	0.052954189	0.089638914	0.067302134	-1.074117049
M11754	5B	678708672	0.063699319	0.402061856	99	0.052954189	0.089636198	0.068017227	1.202836956
M11581	5B	584614254	0.063741873	0.463917526	99	0.052954189	0.089624201	0.069039636	-1.386094623
M5225	2B	643330937	0.063815988	0.402061856	99	0.052954189	0.089603326	0.067379464	-1.088058619
M13799	6B	466953416	0.063907156	0.422680412	99	0.052954189	0.089577684	0.070410887	1.630465338
M14033	6D	495573667	0.063924719	0.216494845	99	0.052954189	0.089572749	0.068652169	1.316751883
M2077	1D	41868233	0.063927766	0.350515464	99	0.052954189	0.089571893	0.067903762	-1.182442963
M11644	5B	600422955	0.06397085	0.12371134	99	0.052954189	0.089559793	0.068585006	-1.304718726
M5040	2B	767024523	0.064060056	0.237113402	99	0.052954189	0.089534769	0.06776855	-1.158125341
M1302	1B	0	0.064073486	0.257731959	99	0.052954189	0.089531005	0.068857457	1.353507242
M13774	6B	713496209	0.064076997	0.206185567	99	0.052954189	0.089530021	0.070988665	1.73295529
M2009	1D	17621853	0.064100507	0.381443299	99	0.052954189	0.089523434	0.069861007	1.53266344
M9928	5A	346214767	0.064101856	0.237113402	99	0.052954189	0.089523056	0.067245415	1.063887835
M5391	2D	0	0.064232523	0.340206186	99	0.052954189	0.089486495	0.069778866	1.518031744
M1342	1B	420692245	0.064298892	0.453608247	99	0.052954189	0.089467955	0.068867272	1.35526366
M11039	5B	630923004	0.064323402	0.412371134	99	0.052954189	0.089461114	0.069770112	-1.516472165
M12404	6A	28011074	0.064323614	0.391752577	99	0.052954189	0.089461055	0.066972692	1.014662733
M2791	2A	497439858	0.064336007	0.12371134	99	0.052954189	0.089457596	0.068291699	1.252123264
M9959	5A	54941693	0.064364287	0.453608247	99	0.052954189	0.089449708	0.067385757	-1.08919294
M90	1A	14520409	0.064413489	0.381443299	99	0.052954189	0.089435992	0.068498082	-1.289139424
M8210	3B	317056611	0.064419616	0.226804124	99	0.052954189	0.089434285	0.069121409	-1.400712391
M5863	2D	609493877	0.064427463	0.422680412	99	0.052954189	0.089432099	0.06644189	0.918663569
M9544	4B	552833548	0.064446536	0.24742268	99	0.052954189	0.089426787	0.067523648	-1.114039013
M514	1A	544430459	0.064469348	0.18556701	99	0.052954189	0.089420435	0.068111185	1.21971632
M14485	7A	13379407	0.064515939	0.082474227	99	0.052954189	0.08940747	0.06999598	1.556693547
M11491	5B	589677807	0.064533561	0.391752577	99	0.052954189	0.089402569	0.066799403	0.983350259
M5436	2D	33564182	0.064620293	0.350515464	99	0.052954189	0.089378468	0.069598819	-1.48594018
M2019	1D	16297590	0.064782738	0.402061856	99	0.052954189	0.089333422	0.068072878	1.212835455
M5154	2B	787037974	0.064850978	0.309278351	99	0.052954189	0.089314536	0.06730783	1.075144185
M1091	1B	601178826	0.064877172	0.350515464	99	0.052954189	0.089307292	0.077162385	-2.811331748
M13803	6B	0	0.064877172	0.350515464	99	0.052954189	0.089307292	0.077162385	-2.811331748
M8659	4A	321099074	0.064877172	0.350515464	99	0.052954189	0.089307292	0.077162385	-2.811331748
M8685	4A	269059397	0.064877172	0.350515464	99	0.052954189	0.089307292	0.077162385	-2.811331748
M8697	4A	326976519	0.064877172	0.350515464	99	0.052954189	0.089307292	0.077162385	-2.811331748
M8813	4A	605005072	0.064877172	0.350515464	99	0.052954189	0.089307292	0.077162385	-2.811331748
M8695	4A	0	0.064877172	0.350515464	99	0.052954189	0.089307292	0.077162385	2.811331748
M8711	4A	584046320	0.064877172	0.350515464	99	0.052954189	0.089307292	0.077162385	2.811331748
M315	1A	481243230	0.064891204	0.381443299	99	0.052954189	0.089303413	0.069557182	1.478514939
M997	1B	41982366	0.064926388	0.237113402	99	0.052954189	0.08929369	0.068140122	1.224913136
M1337	1B	380472532	0.064929769	0.463917526	99	0.052954189	0.089292756	0.066206161	-0.875948266
M1067	1B	174663837	0.065022122	0.113402062	99	0.052954189	0.089267264	0.069261735	-1.425783892
M770	1B	675284827	0.065151474	0.206185567	99	0.052954189	0.089231626	0.067315952	1.076608721
M4227	2B	180559587	0.06516856	0.422680412	99	0.052954189	0.089226924	0.066321708	-0.896892245
M6063	3A	9012647	0.0652624	0.340206186	99	0.052954189	0.089201125	0.067957176	1.192045037
M8088	3B	0	0.065270155	0.463917526	99	0.052954189	0.089198995	0.066733664	0.97146432
M7714	3B	677309290	0.06530642	0.268041237	99	0.052954189	0.089189036	0.067053267	1.029213036
M12419	6A	38723974	0.065423753	0.134020619	99	0.052954189	0.089156859	0.067846636	-1.17217098
M12698	6A	617183332	0.065428106	0.484536082	99	0.052954189	0.089155666	0.068922546	1.365153371
M1452	1B	45280118	0.065440655	0.381443299	99	0.052954189	0.089152229	0.067945645	-1.189972395
M2432	2A	8804062	0.065543903	0.463917526	99	0.052954189	0.089123973	0.074625974	2.371906548
M5845	2D	591437758	0.065571293	0.412371134	99	0.052954189	0.089116485	0.070321947	1.614663809
M5860	2D	587648696	0.065571293	0.412371134	99	0.052954189	0.089116485	0.070321947	1.614663809
M9345	4A	18775545	0.065754861	0.432989691	99	0.052954189	0.089066391	0.068510896	-1.29143659
M9182	4A	708632155	0.065769479	0.443298969	99	0.052954189	0.089062409	0.071143137	-1.760309363
M11390	5B	437451308	0.065813039	0.154639175	99	0.052954189	0.089050546	0.068497509	-1.289036806
M14361	7A	669206467	0.065821377	0.010309278	99	0.052954189	0.089048277	0.081118051	-3.487154937
M360	1A	641985039	0.065821377	0.010309278	99	0.052954189	0.089048277	0.081118051	-3.487154937
M7803	3B	720217864	0.065821377	0.010309278	99	0.052954189	0.089048277	0.081118051	-3.487154937
M11927	5D	494878765	0.065963713	0.453608247	99	0.052954189	0.089009581	0.069080263	-1.393357952
M309	1A	362317345	0.066039213	0.216494845	99	0.052954189	0.088989093	0.068274499	-1.249036726
M12958	6B	732212	0.066043638	0.082474227	99	0.052954189	0.088987893	0.070250097	-1.601893485
M14503	7A	55923161	0.066079007	0.144329897	99	0.052954189	0.088978304	0.068468682	-1.28386861
M9585	4B	666525732	0.066083327	0.494845361	99	0.052954189	0.088977133	0.069725158	1.508461732
M12084	6A	0	0.066141303	0.474226804	99	0.052954189	0.088961429	0.066532777	-0.935119154
M3030	2A	720450589	0.066280183	0.298969072	99	0.052954189	0.08892387	0.067391421	-1.090213891
M1734	1B	637394257	0.066331369	0.453608247	99	0.052954189	0.088910049	0.067753391	1.155398145
M4671	2B	697716067	0.066368194	0.494845361	99	0.052954189	0.088900112	0.067076725	-1.03344813
M6129	3A	22234939	0.066440854	0.12371134	99	0.052954189	0.088880524	0.069674285	1.499394603
M544	1A	557295605	0.066498613	0.226804124	99	0.052954189	0.08886497	0.067946167	-1.190066104
M12648	6A	592875661	0.066732063	0.412371134	99	0.052954189	0.088802252	0.067327649	-1.078717646
M13166	6B	109155311	0.066807655	0.041237113	99	0.052954189	0.088781995	0.072567596	-2.011628723
M12686	6A	555108932	0.066908847	0.206185567	99	0.052954189	0.088754916	0.068016998	-1.202795938
M12582	6A	525799703	0.067028133	0.350515464	99	0.052954189	0.088723053	0.067075653	-1.033254517
M12695	6A	415890191	0.067074595	0.494845361	99	0.052954189	0.088710659	0.068197474	-1.235210981
M9090	4A	692078422	0.067163715	0.175257732	99	0.052954189	0.088686911	0.068070978	-1.212494197
M193	1A	489600357	0.067223193	0.422680412	99	0.052954189	0.088671081	0.066407175	-0.912376246
M765	1B	3569552	0.067296327	0.268041237	99	0.052954189	0.088651638	0.067384549	-1.088975339
M8808	4A	601841436	0.067351134	0.103092784	99	0.052954189	0.088637082	0.069683641	-1.501062402
M7863	3B	736747193	0.06738614	0.18556701	99	0.052954189	0.088627792	0.067309836	-1.075505903
M2979	2A	710269269	0.067391715	0.278350515	99	0.052954189	0.088626313	0.06760331	-1.128385358
M7880	3B	0	0.067468621	0.082474227	99	0.052954189	0.088605922	0.070234426	1.599107737
M3206	2A	15356248	0.067493188	0.237113402	99	0.052954189	0.088599414	0.067007913	1.021023627
M1454	1B	99914122	0.06751946	0.154639175	99	0.052954189	0.088592457	0.071271885	-1.783092983
M3089	2A	742581040	0.067689434	0.113402062	99	0.052954189	0.088547518	0.068592637	-1.306086109
M10909	5B	438017304	0.067764754	0.226804124	99	0.052954189	0.088527644	0.067669764	1.140348826
M9895	5A	82132019	0.067822183	0.412371134	99	0.052954189	0.088512507	0.070017141	-1.56045957
M11576	5B	4511373	0.067904683	0.144329897	99	0.052954189	0.088490785	0.068993967	1.377928284
M3957	2B	705800767	0.067962826	0.309278351	99	0.052954189	0.088475494	0.072053881	1.921184407
M8818	4A	608982503	0.067973753	0.432989691	99	0.052954189	0.088472622	0.069184037	-1.411904092
M8824	4A	612096350	0.067973753	0.432989691	99	0.052954189	0.088472622	0.069184037	-1.411904092
M4378	2B	649670177	0.068061272	0.206185567	99	0.052954189	0.088449636	0.068055333	-1.209683651
M4474	2B	638230965	0.068086328	0.278350515	99	0.052954189	0.088443061	0.067295151	1.072857761
M10337	5A	565416981	0.068114254	0.422680412	99	0.052954189	0.088435736	0.066958422	-1.012085218
M11605	5B	588509505	0.068117055	0.484536082	99	0.052954189	0.088435002	0.068506323	-1.290616707
M6128	3A	19895266	0.068142064	0.443298969	99	0.052954189	0.088428445	0.067915819	-1.184610744
M9992	5A	46505672	0.068143179	0.474226804	99	0.052954189	0.088428153	0.068973465	-1.374261606
M12860	6A	75268104	0.068192137	0.288659794	99	0.052954189	0.088415325	0.067218361	1.059007836
M14533	7A	68211926	0.068280983	0.381443299	99	0.052954189	0.088392072	0.07100091	1.735124314
M10822	5B	408228341	0.068289234	0.113402062	99	0.052954189	0.088389914	0.068302065	1.25398335
M7810	3B	544414886	0.068682137	0.051546392	99	0.052954189	0.088287488	0.072829288	-2.057619792
M8571	4A	45872485	0.068707625	0.432989691	99	0.052954189	0.088280866	0.068688874	-1.323326313
M5087	2B	770053999	0.068713759	0.340206186	99	0.052954189	0.088279273	0.067635604	1.134199665
M13126	6B	51997445	0.068805385	0.072164948	99	0.052954189	0.08825549	0.070186709	-1.590623736
M4627	2B	689711741	0.068857984	0.309278351	99	0.052954189	0.088241853	0.066686301	0.962898621
M2910	2A	677497860	0.06886529	0.175257732	99	0.052954189	0.08823996	0.068259631	1.246368301
M6895	3B	8739414	0.068978777	0.371134021	99	0.052954189	0.088210579	0.073502824	-2.175738235
M4487	2B	577540966	0.069148326	0.443298969	99	0.052954189	0.088166782	0.069609354	-1.487818784
M9114	4A	701293979	0.069514921	0.12371134	99	0.052954189	0.088072483	0.069333472	1.438594273
M13686	6B	707207597	0.069579599	0.278350515	99	0.052954189	0.088055902	0.066772821	0.978544518
M2739	2A	451543116	0.069729058	0.484536082	99	0.052954189	0.088017651	0.068423925	1.275843289
M712	1B	2496086	0.069737414	0.453608247	99	0.052954189	0.088015515	0.068662825	1.318660643
M6534	3A	643546998	0.069883999	0.412371134	99	0.052954189	0.08797809	0.068154742	-1.227538495
M4810	2B	734646054	0.07003237	0.402061856	99	0.052954189	0.087940297	0.067358628	-1.084302726
M8921	4A	651777951	0.070125089	0.329896907	99	0.052954189	0.087916724	0.071801112	1.876603312
M15572	7B	0	0.0701621	0.206185567	99	0.052954189	0.087907323	0.068205514	-1.2366544
M8768	4A	597058372	0.07020885	0.195876289	99	0.052954189	0.087895457	0.067168946	-1.050092308
M651	1A	7014108	0.070235079	0.432989691	99	0.052954189	0.087888803	0.067163859	1.049174363
M5150	2B	0	0.070245534	0.12371134	99	0.052954189	0.087886152	0.068255569	-1.245639318
M10777	5B	398715853	0.070263912	0.402061856	99	0.052954189	0.087881492	0.067777614	-1.159756078
M12016	5D	0	0.070457033	0.484536082	99	0.052954189	0.087832606	0.068167075	1.229753
M3614	2B	26497203	0.070461226	0.257731959	99	0.052954189	0.087831546	0.068260003	-1.246435081
M34	1A	3982825	0.070485344	0.082474227	99	0.052954189	0.087825452	0.069000572	-1.3791094
M9645	4B	660656439	0.07048913	0.175257732	99	0.052954189	0.087824496	0.068604289	1.308173892
M9648	4B	658205308	0.07048913	0.175257732	99	0.052954189	0.087824496	0.068604289	1.308173892
M2748	2A	507314141	0.07071605	0.226804124	99	0.052954189	0.087767268	0.068698127	-1.32498339
M12772	6A	714489935	0.070724351	0.494845361	99	0.052954189	0.087765179	0.067949736	1.190707627
M8064	3B	748377632	0.070750969	0.103092784	99	0.052954189	0.08775848	0.06971693	1.506995499
M6588	3A	496490823	0.070798145	0.484536082	99	0.052954189	0.087746614	0.066102114	-0.857078517
M7185	3B	825539318	0.070880249	0.309278351	99	0.052954189	0.087725984	0.066918074	1.004796507
M1829	1B	475449961	0.070992671	0.360824742	99	0.052954189	0.087697777	0.066295151	-0.892079683
M11074	5B	504309024	0.071003573	0.381443299	99	0.052954189	0.087695045	0.06716135	-1.048721677
M7978	3B	762845618	0.071128823	0.030927835	99	0.052954189	0.087663682	0.073565199	2.186658714
M15518	7B	601776139	0.071130127	0.268041237	99	0.052954189	0.087663356	0.068223649	-1.239909924
M28	1A	1238067	0.071179035	0.051546392	99	0.052954189	0.087651126	0.0717042	-1.859496947
M12656	6A	512346041	0.071190853	0.422680412	99	0.052954189	0.087648172	0.066839583	-0.990612977
M2470	2A	21178378	0.07124815	0.206185567	99	0.052954189	0.087633859	0.070832657	1.705309056
M3572	2B	695616717	0.071299447	0.474226804	99	0.052954189	0.087621055	0.066695014	-0.964474476
M83	1A	14718514	0.071306111	0.391752577	99	0.052954189	0.087619392	0.067376939	1.087603601
M4200	2B	231105626	0.071395165	0.288659794	99	0.052954189	0.08759719	0.06680917	0.985115724
M7184	3B	30016583	0.071476481	0.432989691	99	0.052954189	0.087576944	0.066302516	0.893414333
M2696	2A	227082704	0.071618527	0.195876289	99	0.052954189	0.087541636	0.071175345	1.766010232
M1124	1B	95336138	0.071768702	0.371134021	99	0.052954189	0.087504391	0.070343949	-1.618573283
M4727	2B	712642131	0.071813301	0.412371134	99	0.052954189	0.087493347	0.067820864	1.167535912
M11612	5B	589677095	0.071909458	0.154639175	99	0.052954189	0.087469559	0.068646601	1.315754425
M5967	2D	644662016	0.071958387	0.226804124	99	0.052954189	0.087457468	0.069113181	1.399241835
M10246	5A	423757581	0.072066776	0.24742268	99	0.052954189	0.087430717	0.067173029	1.050829047
M15312	7B	162779025	0.072135994	0.082474227	99	0.052954189	0.087413656	0.070740352	1.688942211
M4225	2B	208215441	0.072136165	0.432989691	99	0.052954189	0.087413614	0.068334929	1.259879926
M5048	2B	521686423	0.07219643	0.24742268	99	0.052954189	0.087398774	0.068015171	-1.202467514
M6395	3A	473708936	0.072285228	0.494845361	99	0.052954189	0.087376933	0.069148724	1.405594135
M14319	7A	0	0.072368349	0.278350515	99	0.052954189	0.087356515	0.067399069	1.091592362
M9053	4A	660462703	0.072427118	0.113402062	99	0.052954189	0.087342094	0.070229086	1.59815843
M7163	3B	244662945	0.072465482	0.453608247	99	0.052954189	0.087332687	0.066561959	0.940401074
M2611	2A	0	0.072599819	0.412371134	99	0.052954189	0.08729979	0.066349095	0.901854725
M14819	7A	636900029	0.072633457	0.350515464	99	0.052954189	0.087291563	0.076171043	-2.640166681
M14846	7A	679967840	0.072633457	0.350515464	99	0.052954189	0.087291563	0.076171043	-2.640166681
M754	1B	761679922	0.072672882	0.298969072	99	0.052954189	0.087281926	0.066909917	-1.003322677
M11492	5B	589677807	0.07279575	0.381443299	99	0.052954189	0.087251928	0.066320124	-0.896605192
M3750	2B	409194219	0.072817506	0.092783505	99	0.052954189	0.087246623	0.069669442	1.498531425
M14510	7A	56245466	0.072832626	0.24742268	99	0.052954189	0.087242936	0.066354535	0.902840326
M5868	2D	601604653	0.072841195	0.06185567	99	0.052954189	0.087240847	0.071037214	1.741554445
M12553	6A	39131835	0.072875067	0.432989691	99	0.052954189	0.087232593	0.06643178	0.916832605
M7291	3B	557949309	0.072972284	0.360824742	99	0.052954189	0.087208925	0.07476674	-2.396423002
M6485	3A	598916422	0.073099346	0.257731959	99	0.052954189	0.087178044	0.066634186	-0.953470912
M9094	4A	690916906	0.073121763	0.340206186	99	0.052954189	0.087172602	0.073697459	-2.209804146
M2830	2A	579584012	0.073139254	0.350515464	99	0.052954189	0.087168356	0.067527548	1.114741662
M8940	4A	673929919	0.073187133	0.175257732	99	0.052954189	0.087156742	0.067242657	-1.063390444
M6131	3A	0	0.073217112	0.154639175	99	0.052954189	0.087149474	0.069101682	-1.397186556
M13679	6B	705935137	0.073361415	0.402061856	99	0.052954189	0.087114534	0.066760313	-0.976282995
M12967	6B	8782571	0.073423998	0.432989691	99	0.052954189	0.087099404	0.069108909	1.398478379
M13520	6B	643863993	0.073446811	0.24742268	99	0.052954189	0.087093893	0.067352401	1.083180097
M9696	4B	562337110	0.073494443	0.432989691	99	0.052954189	0.087082391	0.067897701	-1.181353246
M1138	1B	220883994	0.07349452	0.257731959	99	0.052954189	0.087082372	0.06814267	1.225370664
M501	1A	547323146	0.073679968	0.24742268	99	0.052954189	0.087037669	0.066795437	0.982633229
M11604	5B	686004162	0.073771744	0.175257732	99	0.052954189	0.087015591	0.068096262	-1.217035965
M6808	3A	732737562	0.0738214	0.195876289	99	0.052954189	0.087003658	0.066921217	1.005364338
M1062	1B	168149961	0.073826607	0.041237113	99	0.052954189	0.087002407	0.073206789	2.123867113
M1236	1B	86102631	0.073826607	0.041237113	99	0.052954189	0.087002407	0.073206789	-2.123867113
M8063	3B	748377632	0.074177838	0.432989691	99	0.052954189	0.086918258	0.069768736	1.516227009
M1882	1B	668913016	0.074220918	0.103092784	99	0.052954189	0.086907967	0.069846287	-1.530041829
M6230	3A	563120760	0.0742403	0.432989691	99	0.052954189	0.086903339	0.066235156	-0.881205014
M4108	2B	277093048	0.074316244	0.092783505	99	0.052954189	0.086885218	0.06839477	-1.270614398
M15020	7A	712493182	0.074428555	0.206185567	99	0.052954189	0.086858457	0.067537485	1.116531463
M3931	2B	154602689	0.074444384	0.113402062	99	0.052954189	0.086854689	0.068049134	1.208569961
M4792	2B	724734789	0.07447328	0.319587629	99	0.052954189	0.086847812	0.072917309	2.073076749
M2297	1D	488579573	0.074583764	0.360824742	99	0.052954189	0.086821546	0.066753185	0.974994198
M10089	5A	461901240	0.074611357	0.237113402	99	0.052954189	0.086814993	0.067590283	-1.126039814
M1741	1B	502110575	0.07463864	0.391752577	99	0.052954189	0.086808516	0.066827646	-0.98845546
M14867	7A	670917940	0.07465558	0.453608247	99	0.052954189	0.086804496	0.069176092	-1.410484478
M2505	2A	419266894	0.074776487	0.319587629	99	0.052954189	0.086775831	0.068112665	-1.219982009
M5684	2D	0	0.074794812	0.381443299	99	0.052954189	0.08677149	0.06689177	-1.000043793
M4622	2B	665938471	0.074871247	0.391752577	99	0.052954189	0.0867534	0.066720952	0.969165535
M2041	1D	44652596	0.074994835	0.453608247	99	0.052954189	0.086724192	0.06799406	1.198673887
M4514	2B	299291476	0.075057475	0.268041237	99	0.052954189	0.086709408	0.068084685	-1.214956365
M6130	3A	22234939	0.075069803	0.474226804	99	0.052954189	0.0867065	0.069299628	1.432551242
M15542	7B	642273695	0.075141823	0.319587629	99	0.052954189	0.086689522	0.068561339	1.300477528
M855	1B	41526660	0.075221038	0.329896907	99	0.052954189	0.086670868	0.071867693	-1.888351229
M590	1A	564125239	0.075334742	0.072164948	99	0.052954189	0.086644131	0.070721589	-1.685614371
M9780	4D	455472305	0.075337219	0.402061856	99	0.052954189	0.086643549	0.068877252	-1.357049458
M5412	2D	22205043	0.075432587	0.329896907	99	0.052954189	0.086621158	0.068062992	-1.211059514
M11156	5B	528222137	0.075464967	0.06185567	99	0.052954189	0.086613562	0.070694071	1.680733283
M12413	6A	48048270	0.075528495	0.072164948	99	0.052954189	0.086598671	0.069465035	1.462076695
M1378	1B	471174490	0.075570209	0.360824742	99	0.052954189	0.0865889	0.06644269	0.918808311
M455	1A	534938821	0.075791941	0.432989691	99	0.052954189	0.086537063	0.06707435	1.033019307
M198	1A	50833300	0.075853773	0.020618557	99	0.052954189	0.086522638	0.074247062	-2.305836854
M11793	5B	656472011	0.075946536	0.041237113	99	0.052954189	0.08650102	0.073112893	-2.107400072
M11744	5B	680852435	0.075946536	0.041237113	99	0.052954189	0.08650102	0.073112893	2.107400072
M11776	5B	684700913	0.075946536	0.041237113	99	0.052954189	0.08650102	0.073112893	2.107400072
M11701	5B	634081712	0.075994692	0.360824742	99	0.052954189	0.086489809	0.067474502	1.105185534
M11640	5B	598117781	0.076226258	0.350515464	99	0.052954189	0.086436006	0.06609743	0.856228629
M12597	6A	57659058	0.076324245	0.474226804	99	0.052954189	0.086413294	0.068985237	-1.376367048
M5105	2B	772149581	0.076343917	0.113402062	99	0.052954189	0.086408738	0.069154683	-1.40665901
M13687	6B	614446534	0.076457495	0.463917526	99	0.052954189	0.086382459	0.067318386	-1.077047552
M9133	4A	236257089	0.076552011	0.443298969	99	0.052954189	0.086360622	0.069873525	-1.534892799
M9945	5A	46628073	0.076557903	0.453608247	99	0.052954189	0.086359262	0.068370036	-1.266177919
M3997	2B	0	0.076656323	0.319587629	99	0.052954189	0.086336557	0.07138347	-1.80282846
M3566	2B	0	0.07669755	0.494845361	99	0.052954189	0.086327056	0.066473578	-0.924401735
M2274	1D	481841103	0.076749945	0.360824742	99	0.052954189	0.086314988	0.066725005	-0.969898575
M2720	2A	410880700	0.076751809	0.288659794	99	0.052954189	0.086314559	0.06852789	-1.294482759
M4548	2B	37117645	0.076825677	0.226804124	99	0.052954189	0.086297562	0.067503892	-1.110480313
M8034	3B	41316128	0.076893032	0.329896907	99	0.052954189	0.08628208	0.068849552	-1.35209251
M3008	2A	683749636	0.076992827	0.381443299	99	0.052954189	0.086259168	0.06596363	0.831947763
M15021	7A	713008363	0.077053139	0.329896907	99	0.052954189	0.086245336	0.066455555	-0.921138097
M8317	3D	31446070	0.077122004	0.319587629	99	0.052954189	0.086229558	0.067012055	1.021771765
M15240	7B	57681594	0.077363077	0.463917526	99	0.052954189	0.086174444	0.0679474	1.190287723
M14017	6D	9514548	0.077431813	0.474226804	99	0.052954189	0.086158764	0.069551945	1.477580845
M7738	3B	0	0.077478099	0.484536082	99	0.052954189	0.086148213	0.06601071	-0.84049329
M12986	6B	1328375	0.077492802	0.340206186	99	0.052954189	0.086144864	0.066575768	0.942900363
M11698	5B	626337103	0.077571323	0.24742268	99	0.052954189	0.086126985	0.067344795	-1.081808931
M4508	2B	690747730	0.077612927	0.340206186	99	0.052954189	0.086117521	0.066712823	-0.967695495
M11868	5B	552916735	0.077650769	0.371134021	99	0.052954189	0.086108917	0.067615902	-1.130652587
M9792	4D	465185311	0.077736087	0.237113402	99	0.052954189	0.086089535	0.067362764	1.085048432
M5945	2D	630122654	0.07786591	0.463917526	99	0.052954189	0.086060088	0.06635875	-0.903603994
M8329	3D	36585093	0.077959596	0.371134021	99	0.052954189	0.086038871	0.067163464	1.049103083
M8204	3B	317056611	0.07797288	0.340206186	99	0.052954189	0.086035865	0.067725678	1.150411668
M14951	7A	701621418	0.077973098	0.474226804	99	0.052954189	0.086035816	0.067518724	-1.113152087
M12169	6A	94375972	0.078091771	0.350515464	99	0.052954189	0.086008985	0.078044378	2.963001269
M12167	6A	208629062	0.078091771	0.350515464	99	0.052954189	0.086008985	0.078044378	-2.963001269
M12303	6A	16598099	0.078091771	0.350515464	99	0.052954189	0.086008985	0.078044378	-2.963001269
M12317	6A	17587956	0.078091771	0.350515464	99	0.052954189	0.086008985	0.078044378	-2.963001269
M9166	4A	710830242	0.078131101	0.164948454	99	0.052954189	0.086000103	0.067646151	-1.136098338
M2072	1D	46091146	0.078138378	0.484536082	99	0.052954189	0.08599846	0.074589032	-2.365470076
M2353	2A	13437988	0.078138378	0.484536082	99	0.052954189	0.08599846	0.074589032	-2.365470076
M2455	2A	14997782	0.078138378	0.484536082	99	0.052954189	0.08599846	0.074589032	-2.365470076
M2485	2A	20188063	0.078138378	0.484536082	99	0.052954189	0.08599846	0.074589032	-2.365470076
M2661	2A	170938384	0.078138378	0.484536082	99	0.052954189	0.08599846	0.074589032	-2.365470076
M2058	1D	41581295	0.078138378	0.484536082	99	0.052954189	0.08599846	0.074589032	2.365470076
M2397	2A	3629061	0.078138378	0.484536082	99	0.052954189	0.08599846	0.074589032	2.365470076
M2701	2A	510302235	0.078138378	0.484536082	99	0.052954189	0.08599846	0.074589032	2.365470076
M6070	3A	12934993	0.078176493	0.257731959	99	0.052954189	0.085989858	0.06859183	-1.305941515
M5960	2D	24059625	0.078181439	0.432989691	99	0.052954189	0.085988742	0.069719854	1.507516465
M2538	2A	0	0.078239062	0.134020619	99	0.052954189	0.085975746	0.067556382	1.119934751
M4248	2B	483838235	0.078251597	0.175257732	99	0.052954189	0.085972921	0.067266626	-1.067713608
M12699	6A	537865949	0.078302416	0.494845361	99	0.052954189	0.085961471	0.067230133	-1.061131296
M9367	4A	9881884	0.078303412	0.278350515	99	0.052954189	0.085961246	0.067876791	1.177593549
M10609	5B	0	0.078306099	0.494845361	99	0.052954189	0.085960641	0.068935129	1.367404402
M9853	5A	16199701	0.078327381	0.206185567	99	0.052954189	0.085955849	0.067374078	1.087087933
M9949	5A	69140651	0.078337433	0.164948454	99	0.052954189	0.085953585	0.069636709	-1.492696015
M10729	5B	392637226	0.07839927	0.350515464	99	0.052954189	0.08593967	0.07744297	2.85964407
M7176	3B	28804833	0.078408841	0.484536082	99	0.052954189	0.085937518	0.065879676	0.816703895
M11856	5B	552068682	0.078506919	0.371134021	99	0.052954189	0.085915475	0.06738223	1.088557211
M6417	3A	512556910	0.078570248	0.309278351	99	0.052954189	0.085901258	0.076620204	-2.717810164
M12525	6A	80627731	0.078628722	0.154639175	99	0.052954189	0.085888142	0.068839643	-1.350319258
M7497	3B	381348475	0.07862973	0.072164948	99	0.052954189	0.085887916	0.070725243	1.686262387
M9647	4B	658205308	0.078676768	0.494845361	99	0.052954189	0.085877373	0.068381205	1.268181281
M7108	3B	23684392	0.078713214	0.226804124	99	0.052954189	0.085869209	0.068256731	-1.245847895
M10481	5A	95649798	0.078741765	0.484536082	99	0.052954189	0.085862817	0.067916668	-1.184763277
M8066	3B	479995417	0.078754083	0.268041237	99	0.052954189	0.085860059	0.066827522	-0.988432984
M13965	6D	27046183	0.078757754	0.422680412	99	0.052954189	0.085859238	0.069880674	-1.536165782
M865	1B	496978998	0.078788426	0.474226804	99	0.052954189	0.085852374	0.068626099	-1.312081536
M10427	5A	590110051	0.078808607	0.402061856	99	0.052954189	0.08584786	0.06825958	1.246359216
M5865	2D	601604653	0.078910495	0.360824742	99	0.052954189	0.085825089	0.067868369	1.176079198
M14797	7A	626324494	0.078928152	0.051546392	99	0.052954189	0.085821146	0.072120916	-1.932998703
M10715	5B	75319717	0.078963149	0.18556701	99	0.052954189	0.085813334	0.067669596	-1.140318572
M5399	2D	0	0.078973969	0.381443299	99	0.052954189	0.085810919	0.070207128	1.594254369
M4352	2B	0	0.079026138	0.134020619	99	0.052954189	0.085799282	0.068237185	1.242339595
M2755	2A	182889945	0.07906258	0.391752577	99	0.052954189	0.085791159	0.068562315	1.300652562
M543	1A	557295605	0.079063111	0.360824742	99	0.052954189	0.085791041	0.068162792	-1.228983974
M2567	2A	59120189	0.07909923	0.402061856	99	0.052954189	0.085782993	0.066401735	-0.91139081
M9062	4A	4271248	0.079175481	0.453608247	99	0.052954189	0.085766017	0.069495347	-1.467484913
M9652	4B	662396344	0.079181153	0.402061856	99	0.052954189	0.085764755	0.066772674	-0.978517905
M5186	2B	31225147	0.079192576	0.082474227	99	0.052954189	0.085762213	0.070250963	1.602047594
M152	1A	31918043	0.079197097	0.319587629	99	0.052954189	0.085761208	0.066903543	-1.002171025
M9678	4B	16804898	0.079285571	0.309278351	99	0.052954189	0.085741539	0.066637511	0.954072595
M536	1A	551910173	0.079316483	0.329896907	99	0.052954189	0.085734672	0.066733004	-0.971344997
M1083	1B	0	0.079376373	0.319587629	99	0.052954189	0.085721377	0.070182331	1.589845262
M10468	5A	618274809	0.079524511	0.226804124	99	0.052954189	0.085688539	0.066613779	0.949778739
M12560	6A	520667467	0.079781772	0.412371134	99	0.052954189	0.08563167	0.066138588	-0.863694425
M9638	4B	657180139	0.079802524	0.463917526	99	0.052954189	0.085627091	0.06740157	1.092043109
M11625	5B	596993685	0.079833155	0.319587629	99	0.052954189	0.085620335	0.066532658	-0.93509756
M4341	2B	422190933	0.079917257	0.494845361	99	0.052954189	0.085601801	0.068424801	1.27600021
M14251	7A	0	0.080056969	0.391752577	99	0.052954189	0.085571058	0.067343153	1.081512927
M692	1A	491632757	0.08014114	0.432989691	99	0.052954189	0.085552565	0.067065837	-1.03148237
M10330	5A	565404888	0.080151139	0.381443299	99	0.052954189	0.085550369	0.071610975	-1.843034085
M15478	7B	258623016	0.080172245	0.298969072	99	0.052954189	0.085545736	0.067995425	-1.198919275
M9930	5A	81414626	0.080245866	0.237113402	99	0.052954189	0.085529585	0.067219188	-1.059157011
M3693	2B	68579934	0.080248512	0.319587629	99	0.052954189	0.085529005	0.069282964	1.429575426
M7841	3B	735392487	0.080300623	0.340206186	99	0.052954189	0.085517583	0.082671558	-3.749550464
M7846	3B	701892192	0.080300623	0.340206186	99	0.052954189	0.085517583	0.082671558	-3.749550464
M8600	4A	4240767	0.080300623	0.340206186	99	0.052954189	0.085517583	0.082671558	-3.749550464
M8888	4A	34990198	0.080300623	0.340206186	99	0.052954189	0.085517583	0.082671558	-3.749550464
M14868	7A	670917940	0.080300623	0.340206186	99	0.052954189	0.085517583	0.082671558	3.749550464
M7044	3B	126502584	0.080300623	0.340206186	99	0.052954189	0.085517583	0.082671558	3.749550464
M7839	3B	734436502	0.080300623	0.340206186	99	0.052954189	0.085517583	0.082671558	3.749550464
M7843	3B	738156377	0.080300623	0.340206186	99	0.052954189	0.085517583	0.082671558	3.749550464
M8791	4A	525578987	0.080300623	0.340206186	99	0.052954189	0.085517583	0.082671558	3.749550464
M9680	4B	0	0.080300623	0.340206186	99	0.052954189	0.085517583	0.082671558	3.749550464
M9681	4B	108226085	0.080300623	0.340206186	99	0.052954189	0.085517583	0.082671558	3.749550464
M5176	2B	0	0.080346311	0.474226804	99	0.052954189	0.085507576	0.066626471	-0.952075215
M11598	5B	683229885	0.080356782	0.484536082	99	0.052954189	0.085505284	0.068417179	-1.274633404
M9591	4B	647387447	0.080505212	0.484536082	99	0.052954189	0.08547282	0.068380095	-1.267982342
M1276	1B	432597563	0.080573262	0.041237113	99	0.052954189	0.085457959	0.072026779	-1.916406915
M12650	6A	594520636	0.080591293	0.474226804	99	0.052954189	0.085454023	0.067483698	1.106842338
M2258	1D	471927480	0.080641931	0.216494845	99	0.052954189	0.085442976	0.067839505	1.170888509
M5585	2D	459879715	0.08072456	0.432989691	99	0.052954189	0.085424965	0.066330124	0.898417233
M6276	3A	42066915	0.080802407	0.381443299	99	0.052954189	0.085408016	0.071265176	1.781906207
M11485	5B	197611596	0.080850468	0.298969072	99	0.052954189	0.085397561	0.068881614	-1.357830068
M815	1B	183264864	0.080901193	0.134020619	99	0.052954189	0.085386534	0.069023857	-1.383273315
M12287	6A	14388578	0.08091058	0.371134021	99	0.052954189	0.085384494	0.068397976	1.271189423
M8336	3D	37969599	0.08098015	0.371134021	99	0.052954189	0.085369384	0.067302342	1.074154633
M13167	6B	89695899	0.080985326	0.463917526	99	0.052954189	0.08536826	0.06623132	-0.880509717
M9439	4B	7775094	0.081036157	0.340206186	99	0.052954189	0.08535723	0.067903967	-1.182479845
M6503	3A	627917165	0.0810954	0.474226804	99	0.052954189	0.085344384	0.067727613	-1.1507598
M7487	3B	518153058	0.081205029	0.402061856	99	0.052954189	0.085320639	0.069397388	-1.450004392
M6891	3B	7791132	0.081216829	0.412371134	99	0.052954189	0.085318086	0.067327451	-1.078681918
M7755	3B	696333012	0.081285616	0.340206186	99	0.052954189	0.085303208	0.066402232	-0.911480785
M5451	2D	60545999	0.081439688	0.371134021	99	0.052954189	0.085269933	0.069579477	1.482491103
M2042	1D	44652596	0.08145183	0.226804124	99	0.052954189	0.085267314	0.068097749	1.217303098
M9088	4A	697825160	0.081545739	0.144329897	99	0.052954189	0.085247069	0.068547152	-1.297935008
M4535	2B	671040940	0.08160019	0.484536082	99	0.052954189	0.085235343	0.068065095	1.21143729
M12118	6A	0	0.081785537	0.134020619	99	0.052954189	0.085195491	0.067882863	-1.17868545
M12909	6A	614247742	0.081786257	0.206185567	99	0.052954189	0.085195336	0.069222115	1.418706938
M12220	6A	13060739	0.081841783	0.195876289	99	0.052954189	0.085183417	0.070036193	1.563849817
M8358	3D	48269637	0.081988054	0.350515464	99	0.052954189	0.08515206	0.067450856	1.100924992
M10678	5B	37979682	0.082022039	0.432989691	99	0.052954189	0.085144784	0.065948824	-0.829259874
M11200	5B	416173952	0.082039301	0.206185567	99	0.052954189	0.085141089	0.067279587	-1.070051014
M10449	5A	618306850	0.082045809	0.412371134	99	0.052954189	0.085139696	0.07118546	1.767800531
M4349	2B	522833347	0.082134744	0.432989691	99	0.052954189	0.085120676	0.066891558	-1.000005623
M9933	5A	139519642	0.082367512	0.329896907	99	0.052954189	0.085071001	0.066221715	0.878768372
M1108	1B	403186540	0.082451631	0.051546392	99	0.052954189	0.085053087	0.071913335	1.896402551
M10796	5B	395591316	0.082477637	0.134020619	99	0.052954189	0.085047552	0.068644113	-1.315308749
M18	1A	43361	0.082498534	0.463917526	99	0.052954189	0.085043107	0.068239301	1.242719355
M12732	6A	691304428	0.082527549	0.175257732	99	0.052954189	0.085036936	0.068071878	-1.212655917
M12908	6A	615640353	0.082574495	0.360824742	99	0.052954189	0.085026957	0.066664315	-0.958921659
M8875	4A	248917076	0.082602991	0.298969072	99	0.052954189	0.085020903	0.067999961	1.199734361
M2126	1D	530415631	0.082615117	0.226804124	99	0.052954189	0.085018328	0.06863387	1.313473687
M11291	5B	432894116	0.082655297	0.092783505	99	0.052954189	0.085009797	0.070751551	1.690928319
M12231	6A	13276649	0.082776566	0.18556701	99	0.052954189	0.084984076	0.070162145	-1.586255676
M14270	7A	9517687	0.082857247	0.082474227	99	0.052954189	0.084966987	0.06911602	1.399749252
M5488	2D	76800943	0.082965824	0.237113402	99	0.052954189	0.084944018	0.067056369	-1.029773069
M2911	2A	676994096	0.083061092	0.298969072	99	0.052954189	0.084923892	0.076942468	2.773424435
M11941	5D	490937616	0.083167351	0.484536082	99	0.052954189	0.084901473	0.067347469	1.082291055
M1908	1B	677573018	0.083184266	0.298969072	99	0.052954189	0.084897907	0.066081758	-0.85338555
M5834	2D	594543436	0.083223493	0.402061856	99	0.052954189	0.084889641	0.067484388	-1.10696662
M2191	1D	13863738	0.083238697	0.195876289	99	0.052954189	0.084886438	0.070483941	-1.643439503
M5869	2D	239757106	0.083350594	0.402061856	99	0.052954189	0.084862887	0.0705144	-1.648847639
M1779	1B	108812540	0.083442228	0.350515464	99	0.052954189	0.084843626	0.075626728	-2.545869644
M13177	6B	0	0.083510538	0.443298969	99	0.052954189	0.084829282	0.066508644	-0.930750417
M6815	3A	547714720	0.083516349	0.020618557	99	0.052954189	0.084828063	0.07563876	-2.547956567
M6828	3A	742590041	0.083516349	0.020618557	99	0.052954189	0.084828063	0.07563876	-2.547956567
M13576	6B	667201097	0.08362079	0.360824742	99	0.052954189	0.084806159	0.067335566	1.080145105
M12780	6A	610294735	0.08364954	0.18556701	99	0.052954189	0.084800135	0.067364912	-1.085435608
M11861	5B	700001961	0.083806319	0.371134021	99	0.052954189	0.084767324	0.068844842	-1.351249737
M11671	5B	617684309	0.083946105	0.309278351	99	0.052954189	0.084738127	0.070432444	1.634294233
M2965	2A	705340913	0.084005478	0.24742268	99	0.052954189	0.084725741	0.067534208	1.11594123
M10871	5B	431360770	0.084025024	0.298969072	99	0.052954189	0.084721666	0.066397344	-0.910595419
M15186	7B	33652142	0.084026878	0.154639175	99	0.052954189	0.084721279	0.067976084	-1.195443377
M3970	2B	227089235	0.084153481	0.391752577	99	0.052954189	0.084694909	0.068374816	1.267035358
M11418	5B	536046290	0.084335198	0.175257732	99	0.052954189	0.084657135	0.067180013	1.052089279
M14355	7A	23895123	0.084386871	0.412371134	99	0.052954189	0.08464641	0.069594981	1.485255898
M2384	2A	19836679	0.084387068	0.216494845	99	0.052954189	0.084646369	0.069908589	-1.541136451
M734	1B	0	0.084398803	0.206185567	99	0.052954189	0.084643934	0.067703069	-1.146342997
M5633	2D	297509224	0.084460391	0.319587629	99	0.052954189	0.084631163	0.067485713	-1.107205419
M14252	7A	0	0.084577957	0.319587629	99	0.052954189	0.084606811	0.068128304	1.22279077
M3458	2B	563859723	0.084617993	0.092783505	99	0.052954189	0.084598527	0.070452637	-1.637880512
M14386	7A	28691606	0.084830788	0.134020619	99	0.052954189	0.084554569	0.068364873	1.265251818
M5470	2D	69242863	0.084909072	0.072164948	99	0.052954189	0.084538427	0.069591671	1.484665635
M12946	6A	468839603	0.085019964	0.134020619	99	0.052954189	0.084515591	0.068126443	-1.222456589
M14881	7A	692500947	0.085057691	0.030927835	99	0.052954189	0.084507829	0.072395028	-1.98127038
M10037	5A	445275979	0.085129271	0.494845361	99	0.052954189	0.084493112	0.068805702	-1.344244242
M13382	6B	449771887	0.085130332	0.24742268	99	0.052954189	0.084492894	0.066477728	0.925152992
M13169	6B	85384559	0.085175688	0.340206186	99	0.052954189	0.084483577	0.066293941	-0.891860367
M6823	3A	731113205	0.085249572	0.051546392	99	0.052954189	0.08446841	0.071204565	1.771181638
M7431	3B	178614972	0.085269278	0.072164948	99	0.052954189	0.084464367	0.069618165	-1.489389864
M9455	4B	0	0.08528614	0.082474227	99	0.052954189	0.084460909	0.069238566	1.421645591
M1915	1B	676984396	0.085361801	0.371134021	99	0.052954189	0.084445399	0.076060559	2.621044634
M526	1A	549851141	0.085539009	0.371134021	99	0.052954189	0.084409134	0.066338727	-0.899976127
M7999	3B	747699970	0.08557291	0.350515464	99	0.052954189	0.084402205	0.067424798	-1.096229371
M9623	4B	0	0.085612635	0.340206186	99	0.052954189	0.084394091	0.067627051	-1.132659753
M575	1A	45100852	0.085706333	0.298969072	99	0.052954189	0.084374967	0.068226398	-1.240403341
M10417	5A	585223448	0.085847121	0.371134021	99	0.052954189	0.084346275	0.068790221	-1.341473136
M528	1A	534836196	0.085922	0.453608247	99	0.052954189	0.084331036	0.067422929	1.095892574
M9682	4B	108226085	0.086053423	0.041237113	99	0.052954189	0.084304326	0.072519124	2.003103788
M2346	2A	15529824	0.086095717	0.474226804	99	0.052954189	0.084295739	0.071446386	-1.813951548
M9214	4A	14301407	0.08614982	0.391752577	99	0.052954189	0.084284762	0.068323912	-1.257903408
M14399	7A	29808021	0.086170508	0.288659794	99	0.052954189	0.084280567	0.067736041	-1.152276384
M5322	2B	0	0.08626838	0.381443299	99	0.052954189	0.084260734	0.075248531	2.480217704
M985	1B	60359807	0.086294002	0.360824742	99	0.052954189	0.084255546	0.076361647	-2.673133771
M8067	3B	607225973	0.086349432	0.422680412	99	0.052954189	0.084244328	0.06933565	-1.438983261
M10111	5A	441668884	0.086512932	0.24742268	99	0.052954189	0.084211285	0.067886151	1.179276603
M7499	3B	248342512	0.086531063	0.154639175	99	0.052954189	0.084207625	0.067181077	-1.052281133
M12492	6A	440255570	0.086533624	0.371134021	99	0.052954189	0.084207108	0.067191214	1.054110236
M12133	6A	5480626	0.086566457	0.226804124	99	0.052954189	0.084200483	0.068061205	-1.21073853
M5106	2B	772149581	0.086597026	0.144329897	99	0.052954189	0.084194317	0.068380702	1.268091132
M12866	6A	611075429	0.086607209	0.453608247	99	0.052954189	0.084192263	0.068758238	1.335747299
M13767	6B	471249115	0.086722083	0.484536082	99	0.052954189	0.084169116	0.066802185	0.983853005
M13236	6B	414637701	0.086796936	0.041237113	99	0.052954189	0.084154052	0.071998689	1.911454599
M244	1A	369272560	0.086818185	0.340206186	99	0.052954189	0.084149778	0.066033828	-0.844688783
M1610	1B	585076021	0.08682291	0.030927835	99	0.052954189	0.084148828	0.072906772	-2.071226662
M11921	5D	363181276	0.086841054	0.360824742	99	0.052954189	0.08414518	0.073717002	-2.213223034
M12077	6A	4290482	0.086844809	0.391752577	99	0.052954189	0.084144425	0.071154424	-1.762307217
M12079	6A	4290482	0.086844809	0.391752577	99	0.052954189	0.084144425	0.071154424	-1.762307217
M12093	6A	3600330	0.086852182	0.453608247	99	0.052954189	0.084142943	0.065884805	0.817635366
M1626	1B	614701448	0.086892333	0.144329897	99	0.052954189	0.084134873	0.067710891	1.147750679
M2727	2A	493808292	0.086946768	0.350515464	99	0.052954189	0.08412394	0.067996618	1.199133621
M8331	3D	33388803	0.087141324	0.371134021	99	0.052954189	0.084084926	0.066309551	-0.894689381
M9935	5A	79280510	0.087325568	0.113402062	99	0.052954189	0.084048068	0.0685635	1.300864844
M11286	5B	632272593	0.087349086	0.474226804	99	0.052954189	0.084043369	0.069536038	1.474743732
M7502	3B	392957146	0.087400157	0.412371134	99	0.052954189	0.08403317	0.070149169	1.583947952
M5247	2B	477446953	0.087451597	0.113402062	99	0.052954189	0.084022905	0.069445536	1.45859724
M8635	4A	536855271	0.087627335	0.226804124	99	0.052954189	0.083987883	0.06820301	1.236204781
M6100	3A	18157039	0.087657848	0.06185567	99	0.052954189	0.08398181	0.073514644	-2.177807821
M11642	5B	486192860	0.08768207	0.463917526	99	0.052954189	0.083976991	0.068323314	-1.257796037
M10287	5A	0	0.087730851	0.164948454	99	0.052954189	0.083967291	0.068262937	-1.246961705
M10176	5A	472070401	0.087838062	0.494845361	99	0.052954189	0.083945991	0.06854349	1.297278702
M14662	7A	134621823	0.08800371	0.298969072	99	0.052954189	0.083913138	0.066386953	0.908713227
M11222	5B	663529702	0.088141555	0.484536082	99	0.052954189	0.083885851	0.068639938	1.314560815
M9358	4A	729926047	0.088198575	0.216494845	99	0.052954189	0.083874578	0.067901658	-1.182064688
M5639	2D	593898542	0.08820177	0.134020619	99	0.052954189	0.083873946	0.06761344	1.130209376
M7358	3B	120598030	0.08820316	0.422680412	99	0.052954189	0.083873672	0.069512808	1.470599878
M12073	6A	1852832	0.088312098	0.371134021	99	0.052954189	0.083852157	0.073125094	-2.109540127
M14495	7A	55362389	0.088339565	0.319587629	99	0.052954189	0.083846737	0.066151325	-0.866004566
M2633	2A	107180183	0.088538847	0.340206186	99	0.052954189	0.083807468	0.072769227	-2.047069336
M7140	3B	23857659	0.088565193	0.103092784	99	0.052954189	0.083802284	0.06877192	-1.338196951
M12308	6A	0	0.088587777	0.360824742	99	0.052954189	0.083797842	0.070875447	1.712893835
M12710	6A	462272539	0.088610492	0.206185567	99	0.052954189	0.083793374	0.068663461	1.318774564
M2602	2A	435306380	0.088666843	0.072164948	99	0.052954189	0.083782298	0.071266718	-1.782178881
M13983	6D	86013961	0.088701735	0.453608247	99	0.052954189	0.083775443	0.069637912	-1.49291054
M6749	3A	0	0.08871918	0.226804124	99	0.052954189	0.083772017	0.066592364	0.94590361
M6560	3A	651994615	0.088809207	0.144329897	99	0.052954189	0.083754349	0.067854458	-1.173577644
M5631	2D	611215180	0.088820318	0.371134021	99	0.052954189	0.08375217	0.066567871	-0.941471043
M1998	1D	11496996	0.088842922	0.340206186	99	0.052954189	0.083747738	0.068184739	1.232924548
M8653	4A	191051343	0.088848078	0.453608247	99	0.052954189	0.083746727	0.066909531	1.003253005
M9515	4B	0	0.089050352	0.072164948	99	0.052954189	0.08370712	0.069755501	1.513868696
M1196	1B	111836824	0.089106687	0.030927835	99	0.052954189	0.083696107	0.072495511	1.998950368
M12540	6A	449964305	0.089161962	0.298969072	99	0.052954189	0.083685309	0.066735889	0.971866698
M7	1A	0	0.089173274	0.288659794	99	0.052954189	0.0836831	0.066865324	0.995264979
M13727	6B	708271328	0.089178473	0.319587629	99	0.052954189	0.083682085	0.066928194	1.006624656
M4974	2B	46505672	0.089273991	0.144329897	99	0.052954189	0.083663446	0.067369422	1.086248467
M4579	2B	0	0.089313409	0.134020619	99	0.052954189	0.083655761	0.067698781	1.1455713
M11720	5B	658559745	0.089374392	0.309278351	99	0.052954189	0.083643878	0.067548552	1.118524561
M5179	2B	763798678	0.089518542	0.350515464	99	0.052954189	0.083615826	0.067094828	1.036716015
M10653	5B	48874275	0.089562512	0.134020619	99	0.052954189	0.083607279	0.069083536	1.393942888
M1016	1B	50019841	0.089670313	0.494845361	99	0.052954189	0.083586344	0.068185805	-1.23311607
M10497	5A	495979375	0.089709033	0.195876289	99	0.052954189	0.083578831	0.067631341	-1.133432141
M7733	3B	696333527	0.089715154	0.402061856	99	0.052954189	0.083577644	0.06674498	-0.973510545
M3123	2A	748451453	0.089730848	0.268041237	99	0.052954189	0.0835746	0.068270536	1.248325508
M14504	7A	55923161	0.089737715	0.082474227	99	0.052954189	0.083573269	0.069396478	-1.449841887
M10368	5A	689204261	0.089745461	0.422680412	99	0.052954189	0.083571767	0.067566341	1.121728422
M13910	6D	10760221	0.089836014	0.350515464	99	0.052954189	0.083554219	0.067174817	1.051151645
M10649	5B	8959204	0.089917391	0.164948454	99	0.052954189	0.083538466	0.068773927	1.338556125
M9510	4B	481237158	0.090109173	0.288659794	99	0.052954189	0.083501404	0.065922031	0.82439525
M13870	6D	3617227	0.090154699	0.257731959	99	0.052954189	0.083492618	0.069727516	1.508881927
M6281	3A	29861477	0.09020329	0.484536082	99	0.052954189	0.083483247	0.069548719	1.47700555
M9229	4A	14039828	0.090289015	0.340206186	99	0.052954189	0.083466727	0.065847142	0.810794882
M4342	2B	422190933	0.090426731	0.18556701	99	0.052954189	0.083440225	0.067654915	1.137675817
M1906	1B	676717313	0.090428118	0.288659794	99	0.052954189	0.083439958	0.066447098	0.919606664
M646	1A	584104138	0.090449979	0.463917526	99	0.052954189	0.083435755	0.066118811	0.860107333
M9348	4A	18775545	0.090519372	0.020618557	99	0.052954189	0.083422422	0.074929319	2.42471939
M670	1A	583895706	0.090523811	0.350515464	99	0.052954189	0.083421569	0.066043052	-0.846362669
M14947	7A	704615462	0.090548088	0.484536082	99	0.052954189	0.083416908	0.067552717	1.119274835
M9061	4A	4271248	0.090653091	0.206185567	99	0.052954189	0.08339676	0.06673459	-0.971631892
M5925	2D	608375215	0.090686444	0.298969072	99	0.052954189	0.083390366	0.06854891	1.298250175
M914	1B	309086631	0.090793187	0.113402062	99	0.052954189	0.08336992	0.068387261	1.269267645
M2286	1D	0	0.091041914	0.474226804	99	0.052954189	0.083322379	0.067449502	1.100681086
M6977	3B	494041030	0.091290843	0.298969072	99	0.052954189	0.083274943	0.067255675	-1.065738515
M1308	1B	578521082	0.091337172	0.12371134	99	0.052954189	0.083266131	0.069730534	1.509419784
M6118	3A	15478548	0.091553541	0.463917526	99	0.052954189	0.083225038	0.066144308	0.864731949
M8466	3D	553331262	0.09166319	0.298969072	99	0.052954189	0.083204255	0.066279939	-0.889322713
M2451	2A	4351582	0.091817702	0.474226804	99	0.052954189	0.083175015	0.069592013	-1.484726534
M6856	3A	745517190	0.091827223	0.278350515	99	0.052954189	0.083173214	0.069164854	1.408476501
M12214	6A	13815254	0.092034202	0.278350515	99	0.052954189	0.083134134	0.068721125	1.329101938
M9428	4A	733792535	0.092081989	0.329896907	99	0.052954189	0.083125126	0.067350267	1.08279542
M2124	1D	433032816	0.092089894	0.494845361	99	0.052954189	0.083123636	0.072740483	2.042018972
M9407	4A	2052648	0.092173137	0.360824742	99	0.052954189	0.083107956	0.071414841	-1.808374984
M3611	2B	39315545	0.092234191	0.350515464	99	0.052954189	0.083096466	0.066521108	-0.93300676
M5463	2D	61772523	0.092240079	0.494845361	99	0.052954189	0.083095359	0.068011507	-1.201809124
M1505	1B	57318239	0.092285666	0.443298969	99	0.052954189	0.083086786	0.068705259	-1.326260671
M506	1A	546799796	0.092293519	0.381443299	99	0.052954189	0.083085309	0.066140999	0.864131765
M7728	3B	147934387	0.092367835	0.402061856	99	0.052954189	0.083071345	0.067072468	1.032679565
M4418	2B	560269490	0.092393025	0.391752577	99	0.052954189	0.083066614	0.065909003	0.822029591
M853	1B	11179602	0.092650913	0.371134021	99	0.052954189	0.083018266	0.072867534	2.064336742
M12423	6A	54772476	0.092742109	0.12371134	99	0.052954189	0.083001204	0.069462864	1.461689245
M3180	2A	779809063	0.092750456	0.443298969	99	0.052954189	0.082999643	0.066850422	-0.992571892
M6829	3A	70178225	0.092871029	0.340206186	99	0.052954189	0.082977116	0.072084254	-1.926537857
M3133	2A	633678135	0.092962499	0.329896907	99	0.052954189	0.082960048	0.069723911	-1.50823947
M1729	1B	462147666	0.093104182	0.412371134	99	0.052954189	0.082933646	0.068323927	1.257906041
M11853	5B	696426421	0.093165181	0.24742268	99	0.052954189	0.082922293	0.067836281	-1.170308729
M2349	2A	18058853	0.093220721	0.268041237	99	0.052954189	0.082911964	0.067828784	-1.168960427
M2026	1D	18223009	0.093227283	0.350515464	99	0.052954189	0.082910743	0.067336327	1.0802823
M2165	1D	426987465	0.093284274	0.494845361	99	0.052954189	0.082900152	0.07378774	2.225595401
M2717	2A	44973108	0.093298557	0.24742268	99	0.052954189	0.082897498	0.067914703	1.184409968
M3362	2A	0	0.093647023	0.484536082	99	0.052954189	0.082832902	0.066730229	-0.97084317
M9719	4D	580089641	0.093656779	0.443298969	99	0.052954189	0.082831098	0.068677801	-1.321342973
M15164	7B	1747393	0.093700645	0.319587629	99	0.052954189	0.082822986	0.068620237	1.311031298
M1935	1B	678465588	0.093741953	0.360824742	99	0.052954189	0.082815351	0.072757924	2.045083486
M5034	2B	665980183	0.093791723	0.18556701	99	0.052954189	0.082806157	0.06720085	-1.05584878
M4321	2B	691821263	0.093844158	0.484536082	99	0.052954189	0.082796476	0.067578799	1.123971812
M15100	7A	720585870	0.094014973	0.144329897	99	0.052954189	0.082764982	0.069295336	1.431784754
M12168	6A	208629062	0.094021011	0.257731959	99	0.052954189	0.08276387	0.067795768	-1.163021774
M9209	4A	51010741	0.094055603	0.268041237	99	0.052954189	0.0827575	0.069955932	1.549565173
M5644	2D	587305772	0.094311468	0.237113402	99	0.052954189	0.082710465	0.066677168	0.961246519
M15218	7B	0	0.094325394	0.371134021	99	0.052954189	0.082707909	0.067140193	-1.044903797
M11998	5D	553338175	0.094366844	0.360824742	99	0.052954189	0.082700304	0.065927692	-0.825423182
M4637	2B	700740191	0.094428778	0.453608247	99	0.052954189	0.082688948	0.069571863	1.481133143
M10259	5A	540058417	0.094617309	0.175257732	99	0.052954189	0.082654428	0.067412602	1.094031487
M4401	2B	565074839	0.094741635	0.195876289	99	0.052954189	0.082631706	0.067463329	-1.103172578
M7914	3B	754771178	0.094743697	0.340206186	99	0.052954189	0.082631329	0.06632178	0.896905358
M3717	2B	77176639	0.094786759	0.402061856	99	0.052954189	0.082623467	0.070734382	-1.687883326
M2481	2A	17830049	0.09483206	0.484536082	99	0.052954189	0.0826152	0.072126444	1.933972799
M10567	5B	11773089	0.094894661	0.175257732	99	0.052954189	0.082603784	0.068187787	1.233471783
M9405	4A	0	0.095007165	0.402061856	99	0.052954189	0.082583287	0.068348177	1.262256607
M16	1A	25564281	0.095167073	0.494845361	99	0.052954189	0.082554201	0.066188067	-0.872667574
M3929	2B	144247105	0.095206685	0.113402062	99	0.052954189	0.082547004	0.068151604	1.226974945
M4926	2B	370533021	0.095228224	0.103092784	99	0.052954189	0.082543092	0.069084195	-1.394060788
M2644	2A	94276266	0.095313582	0.257731959	99	0.052954189	0.082527599	0.068983191	1.376001001
M2344	2A	7919418	0.095386761	0.474226804	99	0.052954189	0.082514329	0.068240745	1.242978652
M6929	3B	213447	0.095423924	0.402061856	99	0.052954189	0.082507594	0.070061597	-1.568370086
M6938	3B	671990630	0.095423924	0.402061856	99	0.052954189	0.082507594	0.070061597	1.568370086
M5336	2B	789673158	0.095425982	0.371134021	99	0.052954189	0.082507221	0.068693334	1.324125054
M8019	3B	765843802	0.0956867	0.113402062	99	0.052954189	0.082460055	0.068179975	1.232069218
M11330	5B	482592815	0.095687698	0.226804124	99	0.052954189	0.082459875	0.066382953	-0.907988611
M10784	5B	412238621	0.095808591	0.103092784	99	0.052954189	0.082438053	0.068401333	1.271791502
M5476	2D	70950265	0.095857984	0.06185567	99	0.052954189	0.082429146	0.069744569	1.511920741
M8423	3D	452983655	0.095873586	0.453608247	99	0.052954189	0.082426333	0.067200387	1.055765227
M7853	3B	302427239	0.096018616	0.010309278	99	0.052954189	0.082400214	0.082291034	3.685431019
M13737	6B	611901303	0.096018616	0.010309278	99	0.052954189	0.082400214	0.082291034	-3.685431019
M2194	1D	421863618	0.096018616	0.010309278	99	0.052954189	0.082400214	0.082291034	-3.685431019
M7814	3B	549104307	0.096018616	0.010309278	99	0.052954189	0.082400214	0.082291034	-3.685431019
M7826	3B	464837996	0.096018616	0.010309278	99	0.052954189	0.082400214	0.082291034	-3.685431019
M7828	3B	552530358	0.096018616	0.010309278	99	0.052954189	0.082400214	0.082291034	-3.685431019
M7838	3B	441570426	0.096018616	0.010309278	99	0.052954189	0.082400214	0.082291034	-3.685431019
M11468	5B	180044568	0.096075279	0.350515464	99	0.052954189	0.082390022	0.076166454	-2.639372614
M7103	3B	702846789	0.096075279	0.350515464	99	0.052954189	0.082390022	0.076166454	-2.639372614
M12579	6A	530215873	0.096075279	0.350515464	99	0.052954189	0.082390022	0.076166454	2.639372614
M10587	5B	576692587	0.096441398	0.484536082	99	0.052954189	0.082324322	0.068028017	1.204775829
M12628	6A	566632377	0.096486329	0.319587629	99	0.052954189	0.082316279	0.067506215	-1.110898842
M7675	3B	154191322	0.096607404	0.453608247	99	0.052954189	0.082294624	0.067840064	-1.170989018
M70	1A	10423224	0.09671938	0.12371134	99	0.052954189	0.082274623	0.067906741	1.182978583
M3691	2B	68579934	0.096765662	0.288659794	99	0.052954189	0.082266364	0.067034922	1.025900881
M1776	1B	641140613	0.096769519	0.206185567	99	0.052954189	0.082265676	0.06684909	0.992331103
M7025	3B	15100130	0.096779054	0.432989691	99	0.052954189	0.082263975	0.066179536	0.871120589
M7113	3B	22453000	0.096842687	0.24742268	99	0.052954189	0.082252629	0.066445556	-0.919327338
M11139	5B	415747285	0.096856367	0.082474227	99	0.052954189	0.08225019	0.069459631	1.461112446
M10075	5A	0	0.096901446	0.298969072	99	0.052954189	0.082242158	0.067175676	1.05130674
M11795	5B	625779199	0.097027926	0.051546392	99	0.052954189	0.082219645	0.070863016	1.71069057
M3753	2B	392096989	0.097035289	0.257731959	99	0.052954189	0.082218335	0.068115568	-1.220503461
M5911	2D	470884866	0.097041335	0.216494845	99	0.052954189	0.08221726	0.066733378	0.971412643
M6192	3A	312266867	0.097159098	0.103092784	99	0.052954189	0.082196331	0.068833299	1.34918389
M6994	3B	0	0.097202044	0.350515464	99	0.052954189	0.082188705	0.075737122	-2.565012475
M6675	3A	707911761	0.097202044	0.350515464	99	0.052954189	0.082188705	0.075737122	2.565012475
M6813	3A	731225976	0.097202044	0.350515464	99	0.052954189	0.082188705	0.075737122	2.565012475
M7024	3B	0	0.097202044	0.350515464	99	0.052954189	0.082188705	0.075737122	2.565012475
M13835	6B	0	0.097256793	0.412371134	99	0.052954189	0.082178989	0.066076488	0.852429374
M2156	1D	431046013	0.09742965	0.206185567	99	0.052954189	0.082148353	0.069041254	-1.386383951
M5725	2D	0	0.097529524	0.350515464	99	0.052954189	0.082130679	0.075720615	-2.562150757
M14851	7A	676966338	0.097529524	0.350515464	99	0.052954189	0.082130679	0.075720615	2.562150757
M8572	4A	45872485	0.097640473	0.278350515	99	0.052954189	0.082111069	0.067519909	1.113365559
M473	1A	544077560	0.0977011	0.463917526	99	0.052954189	0.082100364	0.066883835	0.99860996
M12875	6A	612290726	0.097716528	0.422680412	99	0.052954189	0.082097641	0.067632168	-1.133581062
M3250	2A	725605315	0.097803759	0.422680412	99	0.052954189	0.082082254	0.067831735	-1.169491125
M12683	6A	435773401	0.09780395	0.484536082	99	0.052954189	0.08208222	0.067295083	-1.072845599
M7494	3B	332877259	0.097923242	0.329896907	99	0.052954189	0.082061202	0.067341321	1.081182679
M4979	2B	751836772	0.098059462	0.381443299	99	0.052954189	0.082037236	0.072464298	-1.993459319
M6318	3A	321105083	0.09811562	0.474226804	99	0.052954189	0.082027367	0.06868483	-1.322601971
M6825	3A	730650978	0.098145216	0.350515464	99	0.052954189	0.082022168	0.075133912	-2.460299016
M6831	3A	320011979	0.098145216	0.350515464	99	0.052954189	0.082022168	0.075133912	-2.460299016
M6868	3A	0	0.098145216	0.350515464	99	0.052954189	0.082022168	0.075133912	-2.460299016
M6822	3A	708059930	0.098145216	0.350515464	99	0.052954189	0.082022168	0.075133912	2.460299016
M6824	3A	731113205	0.098145216	0.350515464	99	0.052954189	0.082022168	0.075133912	2.460299016
M6858	3A	311754583	0.098145216	0.350515464	99	0.052954189	0.082022168	0.075133912	2.460299016
M10851	5B	126862058	0.098212145	0.175257732	99	0.052954189	0.082010418	0.067153831	1.04736484
M8011	3B	533130365	0.098225248	0.134020619	99	0.052954189	0.082008119	0.067881396	1.17842169
M14996	7A	327653785	0.098302478	0.453608247	99	0.052954189	0.081994573	0.066930893	-1.007112314
M11517	5B	715223883	0.098308147	0.288659794	99	0.052954189	0.081993579	0.06766788	-1.140009675
M9689	4B	667731312	0.098330179	0.051546392	99	0.052954189	0.081989717	0.071267739	1.782359625
M11015	5B	485806429	0.098350636	0.371134021	99	0.052954189	0.081986132	0.06600418	-0.839308204
M5255	2B	55935615	0.098353593	0.257731959	99	0.052954189	0.081985614	0.067285138	-1.071052175
M5250	2B	765677047	0.09837231	0.360824742	99	0.052954189	0.081982335	0.069959914	1.550273877
M105	1A	16914186	0.09842699	0.298969072	99	0.052954189	0.081972759	0.065899965	-0.820388461
M3921	2B	46298185	0.098433809	0.072164948	99	0.052954189	0.081971566	0.069715088	-1.506667185
M8878	4A	631914750	0.098455342	0.412371134	99	0.052954189	0.081967796	0.070064936	-1.568964152
M7503	3B	414366969	0.098526063	0.391752577	99	0.052954189	0.081955424	0.070639369	-1.671028367
M7498	3B	381348475	0.098526063	0.391752577	99	0.052954189	0.081955424	0.070639369	1.671028367
M7974	3B	113713782	0.098545486	0.154639175	99	0.052954189	0.081952028	0.067651742	-1.137104751
M2948	2A	691845663	0.098656381	0.432989691	99	0.052954189	0.081932651	0.068031609	-1.205421272
M4206	2B	195059364	0.098690463	0.24742268	99	0.052954189	0.081926701	0.067733459	1.151811665
M12651	6A	554716169	0.098694436	0.432989691	99	0.052954189	0.081926008	0.068496976	1.288941285
M5927	2D	618309251	0.098748193	0.134020619	99	0.052954189	0.081916627	0.068425572	-1.276138546
M13728	6B	708271328	0.098781572	0.092783505	99	0.052954189	0.081910806	0.068689316	-1.323405523
M1516	1B	594654791	0.09880059	0.288659794	99	0.052954189	0.08190749	0.067012494	1.021850872
M954	1B	8569664	0.098847672	0.453608247	99	0.052954189	0.081899284	0.066188266	0.872703594
M6029	3A	9486770	0.098930271	0.463917526	99	0.052954189	0.081884898	0.068429712	1.276880993
M14605	7A	97402806	0.099045771	0.463917526	99	0.052954189	0.081864804	0.0673968	-1.09118347
M1480	1B	555122455	0.099161937	0.432989691	99	0.052954189	0.081844621	0.06749129	-1.108210163
M5791	2D	723067435	0.099175101	0.422680412	99	0.052954189	0.081842335	0.068990027	1.377223638
M14299	7A	17197201	0.099255336	0.175257732	99	0.052954189	0.081828412	0.067664113	1.139331559
M15317	7B	162339083	0.099257533	0.432989691	99	0.052954189	0.081828031	0.069733473	-1.50994364
M9051	4A	655256201	0.099322165	0.340206186	99	0.052954189	0.081816825	0.07853753	3.047555776
M11090	5B	88134360	0.099325558	0.257731959	99	0.052954189	0.081816237	0.067324836	1.078210545
M12518	6A	418539034	0.099358959	0.474226804	99	0.052954189	0.081810449	0.067040286	-1.02686926
M1877	1B	481501570	0.099457881	0.432989691	99	0.052954189	0.08179332	0.069059366	-1.389622163
M3560	2B	0	0.099487832	0.474226804	99	0.052954189	0.081788138	0.066012324	0.84078622
M1060	1B	35143791	0.099641783	0.309278351	99	0.052954189	0.081761527	0.067038105	1.026475566
M2130	1D	244297621	0.099649628	0.329896907	99	0.052954189	0.081760172	0.075217121	-2.474760227
M2424	2A	16730048	0.099695897	0.154639175	99	0.052954189	0.081752184	0.073466603	-2.169395396
M2466	2A	20237416	0.099695897	0.154639175	99	0.052954189	0.081752184	0.073466603	-2.169395396
M2061	1D	41581295	0.099695897	0.154639175	99	0.052954189	0.081752184	0.073466603	2.169395396
M2137	1D	15543975	0.099695897	0.154639175	99	0.052954189	0.081752184	0.073466603	2.169395396
M2412	2A	4637076	0.099695897	0.154639175	99	0.052954189	0.081752184	0.073466603	2.169395396
M2428	2A	21149223	0.099695897	0.154639175	99	0.052954189	0.081752184	0.073466603	2.169395396
M2525	2A	36234739	0.099755322	0.329896907	99	0.052954189	0.08174193	0.067874681	1.17721422
M5545	2D	403470553	0.099788212	0.350515464	99	0.052954189	0.081736258	0.066823913	-0.9877806
M12708	6A	583378219	0.099859966	0.432989691	99	0.052954189	0.081723891	0.066197668	-0.874408496
M9704	4B	86304081	0.099914496	0.360824742	99	0.052954189	0.081714499	0.072488491	1.997715382
M3668	2B	64954602	0.099968998	0.268041237	99	0.052954189	0.081705117	0.067167439	1.049820375
M3310	2A	765401712	0.099989925	0.412371134	99	0.052954189	0.081701517	0.065781684	0.79890306
M6940	3B	0	0.100002161	0.350515464	99	0.052954189	0.081699412	0.076370715	2.674701389
M15564	7B	646603951	0.100009209	0.360824742	99	0.052954189	0.0816982	0.068185475	1.23305673
M6008	2D	642133932	0.100027322	0.268041237	99	0.052954189	0.081695084	0.066585373	0.944638438
M1449	1B	45280100	0.100073739	0.195876289	99	0.052954189	0.081687104	0.06723484	-1.061980399
M12430	6A	104566919	0.100110935	0.319587629	99	0.052954189	0.081680712	0.067063216	-1.031009302
M2073	1D	44261818	0.100121936	0.484536082	99	0.052954189	0.081678822	0.072247824	-1.955355058
M1230	1B	445449025	0.100146568	0.350515464	99	0.052954189	0.081674592	0.066098262	-0.856379621
M3944	2B	431969155	0.100273349	0.298969072	99	0.052954189	0.081652834	0.069519174	-1.471735518
M14344	7A	17252435	0.100342178	0.030927835	99	0.052954189	0.081641034	0.072706266	2.036006212
M8393	3D	250050869	0.100366245	0.402061856	99	0.052954189	0.08163691	0.067202566	1.056158347
M7054	3B	0	0.100369718	0.360824742	99	0.052954189	0.081636315	0.073980986	2.259374758
M12225	6A	17652529	0.100372863	0.340206186	99	0.052954189	0.081635776	0.06820825	-1.237145599
M11545	5B	461255726	0.100386979	0.268041237	99	0.052954189	0.081633358	0.066555858	-0.939296965
M5222	2B	635759512	0.100437886	0.206185567	99	0.052954189	0.081624641	0.066643875	0.955223836
M4448	2B	594205815	0.100495112	0.268041237	99	0.052954189	0.081614848	0.066765344	-0.977192778
M1602	1B	591090372	0.100533062	0.391752577	99	0.052954189	0.081608357	0.066604166	-0.948039258
M12824	6A	605225151	0.10058476	0.432989691	99	0.052954189	0.081599519	0.068149039	1.226514425
M11803	5B	691455890	0.100602612	0.164948454	99	0.052954189	0.081596468	0.068330945	-1.259165191
M6104	3A	18171651	0.100619712	0.164948454	99	0.052954189	0.081593546	0.068335674	-1.260013651
M14408	7A	31106605	0.100679564	0.494845361	99	0.052954189	0.081583324	0.069932495	1.545392709
M5249	2B	765677047	0.100691954	0.030927835	99	0.052954189	0.081581209	0.07326708	-2.13443686
M6045	3A	0	0.100711771	0.175257732	99	0.052954189	0.081577827	0.067241384	-1.063160773
M12550	6A	481341158	0.100752696	0.463917526	99	0.052954189	0.081570844	0.068344674	-1.261628223
M7819	3B	684390179	0.100765592	0.051546392	99	0.052954189	0.081568644	0.070264384	-1.604433115
M4839	2B	743076077	0.1007943	0.463917526	99	0.052954189	0.081563748	0.067839106	-1.170816873
M14969	7A	621160098	0.100910648	0.474226804	99	0.052954189	0.081543922	0.066607373	0.948619556
M5027	2B	758922449	0.10100916	0.381443299	99	0.052954189	0.081527154	0.066522963	-0.933342662
M5465	2D	59658123	0.101067839	0.381443299	99	0.052954189	0.081517176	0.071360427	1.798753748
M10057	5A	469516830	0.101089744	0.371134021	99	0.052954189	0.081513452	0.066969193	-1.014030815
M10652	5B	48311248	0.101132618	0.402061856	99	0.052954189	0.081506167	0.069672561	1.499087348
M314	1A	562808063	0.10128303	0.381443299	99	0.052954189	0.081480636	0.067116749	-1.040672716
M3065	2A	732893513	0.101294327	0.412371134	99	0.052954189	0.08147872	0.067067569	1.031795111
M15555	7B	670917940	0.101318579	0.474226804	99	0.052954189	0.081474608	0.066071137	-0.851458546
M10084	5A	0	0.101336039	0.494845361	99	0.052954189	0.081471648	0.06691255	1.003798477
M517	1A	549589444	0.10137648	0.484536082	99	0.052954189	0.081464795	0.067234892	-1.06198987
M2155	1D	431046013	0.101398028	0.288659794	99	0.052954189	0.081461144	0.067472138	-1.104759587
M13155	6B	0	0.101618971	0.350515464	99	0.052954189	0.081423765	0.066611462	-0.94935955
M11588	5B	8998565	0.101865508	0.484536082	99	0.052954189	0.081382161	0.067653298	-1.137384886
M13720	6B	0	0.101882541	0.18556701	99	0.052954189	0.081379291	0.067138714	1.044636847
M8470	3D	562529915	0.101889427	0.371134021	99	0.052954189	0.081378131	0.071338844	1.794936858
M15558	7B	642499302	0.101961761	0.329896907	99	0.052954189	0.081365949	0.067951363	-1.191000184
M9662	4B	110529024	0.102015315	0.463917526	99	0.052954189	0.081356936	0.065986529	-0.836104322
M11912	5D	88471253	0.102054973	0.237113402	99	0.052954189	0.081350265	0.066301199	0.893175804
M11963	5D	531606683	0.102108867	0.309278351	99	0.052954189	0.081341204	0.066802703	-0.983946746
M12788	6A	680804925	0.102275975	0.103092784	99	0.052954189	0.081313142	0.069613159	1.488497288
M8575	4A	46412568	0.10227672	0.226804124	99	0.052954189	0.081313017	0.067566971	1.121841836
M15108	7A	732392954	0.102284643	0.18556701	99	0.052954189	0.081311688	0.067349567	1.082669364
M1522	1B	562563460	0.10230613	0.195876289	99	0.052954189	0.081308084	0.066769401	0.977926219
M7877	3B	586524432	0.102417952	0.350515464	99	0.052954189	0.081289341	0.07619918	-2.645034974
M3982	2B	0	0.102426204	0.206185567	99	0.052954189	0.081287959	0.067672071	1.140763984
M8585	4A	716765921	0.102497736	0.402061856	99	0.052954189	0.081275982	0.069237319	-1.421422799
M8593	4A	444907045	0.102522159	0.432989691	99	0.052954189	0.081271895	0.069170828	-1.409543889
M15097	7A	720912669	0.102545334	0.402061856	99	0.052954189	0.081268017	0.069557983	-1.478657852
M8820	4A	144566764	0.10255919	0.113402062	99	0.052954189	0.0812657	0.068317701	-1.256788958
M9952	5A	64983046	0.102637429	0.175257732	99	0.052954189	0.081252619	0.067722653	-1.149867313
M13944	6D	24404067	0.102918547	0.494845361	99	0.052954189	0.081205711	0.066862359	-0.994729107
M5662	2D	738255354	0.102969478	0.412371134	99	0.052954189	0.081197228	0.067670934	1.140559352
M363	1A	497201516	0.10302512	0.319587629	99	0.052954189	0.081187966	0.070188512	-1.590944307
M3677	2B	38442340	0.103051642	0.237113402	99	0.052954189	0.081183552	0.067660284	1.138642364
M2040	1D	711983266	0.103066893	0.484536082	99	0.052954189	0.081181015	0.072384514	1.97941993
M1283	1B	392145668	0.103132949	0.360824742	99	0.052954189	0.081170031	0.067833698	1.169844159
M10854	5B	126862058	0.103152806	0.18556701	99	0.052954189	0.081166731	0.067164602	1.049308591
M3943	2B	431969155	0.103205059	0.134020619	99	0.052954189	0.08115805	0.067880696	1.178295766
M4675	2B	595508003	0.103317894	0.371134021	99	0.052954189	0.08113932	0.066427301	0.916021403
M10636	5B	5146049	0.103394472	0.082474227	99	0.052954189	0.081126621	0.071824541	1.880737689
M8565	4A	318817830	0.103418772	0.474226804	99	0.052954189	0.081122594	0.067947516	1.190308713
M4516	2B	568309420	0.103496824	0.412371134	99	0.052954189	0.081109665	0.067457017	1.102035167
M13464	6B	549715721	0.10351442	0.474226804	99	0.052954189	0.081106752	0.065999016	-0.838370877
M6474	3A	595935042	0.103672627	0.422680412	99	0.052954189	0.081080585	0.068175215	-1.2312146
M14749	7A	626447683	0.103725676	0.443298969	99	0.052954189	0.08107182	0.067105441	-1.038631543
M7700	3B	665887152	0.103879304	0.278350515	99	0.052954189	0.081046467	0.067281584	-1.070411191
M13849	6B	715630902	0.103925659	0.195876289	99	0.052954189	0.081038825	0.068841888	1.350720995
M1796	1B	647195583	0.103937643	0.463917526	99	0.052954189	0.08103685	0.067151827	1.04700333
M9217	4A	726716286	0.103999442	0.474226804	99	0.052954189	0.08102667	0.068448113	1.28018065
M7102	3B	0	0.104006449	0.082474227	99	0.052954189	0.081025516	0.068489026	1.287515987
M15541	7B	642273695	0.104060245	0.350515464	99	0.052954189	0.08101666	0.067683334	1.142791147
M6982	3B	6677392	0.104118318	0.134020619	99	0.052954189	0.081007105	0.067592089	-1.126364891
M4350	2B	522833347	0.104266734	0.309278351	99	0.052954189	0.080982714	0.066279247	0.889197208
M12789	6A	599169953	0.104281495	0.463917526	99	0.052954189	0.08098029	0.067562069	1.120959093
M1397	1B	394705218	0.104349632	0.463917526	99	0.052954189	0.080969107	0.067519697	-1.113327395
M2388	2A	4811950	0.104402047	0.216494845	99	0.052954189	0.08096051	0.067974392	1.195139298
M5325	2B	644096629	0.104453708	0.030927835	99	0.052954189	0.080952041	0.072601776	2.017638857
M13003	6B	17701756	0.104477123	0.381443299	99	0.052954189	0.080948204	0.070659952	1.674680343
M1524	1B	564653618	0.104481858	0.432989691	99	0.052954189	0.080947428	0.066927069	1.00642141
M1315	1B	184220516	0.10449555	0.06185567	99	0.052954189	0.080945185	0.071000425	1.735038485
M925	1B	33009274	0.10449555	0.06185567	99	0.052954189	0.080945185	0.071000425	1.735038485
M531	1A	566690179	0.104826045	0.494845361	99	0.052954189	0.080891141	0.067149764	-1.046630889
M15471	7B	600093011	0.104888504	0.154639175	99	0.052954189	0.080880949	0.067282578	1.070590491
M10550	5B	17888082	0.104898687	0.432989691	99	0.052954189	0.080879287	0.066785338	0.980807568
M1436	1B	30873517	0.104906253	0.453608247	99	0.052954189	0.080878053	0.069779832	1.518203912
M9547	4B	557995494	0.104935316	0.381443299	99	0.052954189	0.080873314	0.066434164	-0.917264372
M1131	1B	0	0.104960336	0.360824742	99	0.052954189	0.080869235	0.067005197	-1.020533159
M12975	6B	2439812	0.105193109	0.453608247	99	0.052954189	0.080831339	0.065677868	-0.780034641
M5224	2B	635759512	0.105316664	0.12371134	99	0.052954189	0.080811261	0.067756724	-1.155997723
M10193	5A	3942824	0.105384567	0.226804124	99	0.052954189	0.080800238	0.06664197	0.954879297
M4852	2B	744869635	0.105393635	0.257731959	99	0.052954189	0.080798767	0.066737336	0.97212841
M15214	7B	45000486	0.105449952	0.402061856	99	0.052954189	0.080789632	0.067692939	1.144519952
M2307	1D	683382396	0.105453929	0.340206186	99	0.052954189	0.080788987	0.065732043	0.789882197
M9640	4B	657270812	0.105486744	0.268041237	99	0.052954189	0.080783666	0.066515345	0.931963632
M14397	7A	30008958	0.105539714	0.474226804	99	0.052954189	0.080775082	0.067479068	-1.106008153
M12004	5D	552729543	0.105583721	0.474226804	99	0.052954189	0.080767955	0.065861056	0.813322223
M9294	4A	10975535	0.105585935	0.329896907	99	0.052954189	0.080767596	0.065961767	0.831609527
M93	1A	10241942	0.105640147	0.12371134	99	0.052954189	0.08075882	0.067567833	-1.12199712
M14992	7A	711171415	0.105711155	0.278350515	99	0.052954189	0.080747332	0.067189994	1.053889998
M1735	1B	635977802	0.105753267	0.391752577	99	0.052954189	0.080740524	0.068519041	1.292896573
M7272	3B	478901478	0.105813431	0.484536082	99	0.052954189	0.080730802	0.066156114	0.866873036
M737	1B	0	0.105993158	0.12371134	99	0.052954189	0.080701796	0.067959234	1.192414812
M7058	3B	17785833	0.106047678	0.020618557	99	0.052954189	0.080693007	0.076237246	2.651620312
M11398	5B	605874657	0.106092875	0.24742268	99	0.052954189	0.080685726	0.066680147	0.961785473
M4424	2B	544170551	0.106145279	0.051546392	99	0.052954189	0.080677287	0.070743902	-1.689571694
M7751	3B	72949372	0.106146505	0.443298969	99	0.052954189	0.08067709	0.065719625	-0.787625244
M8405	3D	305622118	0.106219431	0.381443299	99	0.052954189	0.080665355	0.069276138	1.428356358
M12028	5D	0	0.106255502	0.030927835	99	0.052954189	0.080659554	0.072887453	-2.067834598
M8187	3B	609741282	0.106416112	0.18556701	99	0.052954189	0.080633751	0.067992952	-1.19847488
M469	1A	410991937	0.106416735	0.484536082	99	0.052954189	0.080633651	0.06726179	-1.066841412
M14745	7A	538052365	0.106537239	0.402061856	99	0.052954189	0.080614319	0.066345019	0.901116164
M14142	7A	0	0.106557121	0.288659794	99	0.052954189	0.080611132	0.067018573	1.022948614
M1413	1B	0	0.106644178	0.494845361	99	0.052954189	0.080597185	0.067205014	-1.056599863
M10341	5A	555989261	0.106716157	0.082474227	99	0.052954189	0.080585662	0.068757916	1.335689756
M2631	2A	102322925	0.106787254	0.463917526	99	0.052954189	0.080574289	0.066950434	-1.010642275
M354	1A	485228466	0.106815813	0.113402062	99	0.052954189	0.080569723	0.067804481	-1.164589167
M4610	2B	574820263	0.106817815	0.18556701	99	0.052954189	0.080569403	0.067276304	1.069459095
M1757	1B	0	0.106878987	0.072164948	99	0.052954189	0.080559628	0.06836079	-1.264519305
M1121	1B	39854453	0.10692855	0.309278351	99	0.052954189	0.080551713	0.068785164	-1.340567811
M2115	1D	472550886	0.106991604	0.412371134	99	0.052954189	0.080541648	0.066607578	0.948656633
M5228	2B	643330937	0.1071652	0.402061856	99	0.052954189	0.080513974	0.066410428	0.912965351
M9916	5A	42684379	0.107298327	0.237113402	99	0.052954189	0.080492785	0.066038582	0.845551397
M7327	3B	59889573	0.107410807	0.12371134	99	0.052954189	0.080474906	0.068012348	-1.201960369
M9473	4B	189530997	0.10773053	0.051546392	99	0.052954189	0.080424196	0.07085461	1.709200553
M10085	5A	470186523	0.107777396	0.402061856	99	0.052954189	0.080416777	0.067512927	1.112107863
M7505	3B	130253586	0.107805039	0.24742268	99	0.052954189	0.080412403	0.066816406	0.986423748
M11105	5B	511603033	0.107834661	0.474226804	99	0.052954189	0.080407717	0.067219272	-1.059172071
M13745	6B	462838981	0.107876371	0.371134021	99	0.052954189	0.080401121	0.066003439	0.839173609
M15292	7B	169497947	0.107877038	0.432989691	99	0.052954189	0.080401016	0.06832527	1.258147057
M3315	2A	767324605	0.10800996	0.422680412	99	0.052954189	0.080380015	0.068032295	1.205544468
M9136	4A	432988616	0.108116739	0.092783505	99	0.052954189	0.080363166	0.070267311	1.604953385
M9141	4A	708078692	0.108116739	0.092783505	99	0.052954189	0.080363166	0.070267311	1.604953385
M8320	3D	37969650	0.108291664	0.494845361	99	0.052954189	0.080335603	0.068208069	-1.237113109
M851	1B	0	0.108295881	0.319587629	99	0.052954189	0.080334939	0.065949378	-0.829360359
M8335	3D	37969599	0.108306554	0.268041237	99	0.052954189	0.080333259	0.066666373	0.959293869
M12155	6A	5444568	0.10833105	0.371134021	99	0.052954189	0.080329404	0.068929913	1.366471256
M7786	3B	671011745	0.108354949	0.24742268	99	0.052954189	0.080325644	0.066550842	0.938388931
M13532	6B	655890375	0.108547897	0.340206186	99	0.052954189	0.080295319	0.073332801	2.145955406
M1898	1B	674933891	0.10864907	0.443298969	99	0.052954189	0.080279441	0.066837288	0.990198185
M11318	5B	373116658	0.108660364	0.360824742	99	0.052954189	0.08027767	0.067288109	1.071588014
M10896	5B	540055568	0.108741407	0.309278351	99	0.052954189	0.080264965	0.066268456	-0.887241445
M1638	1B	601383349	0.108806273	0.103092784	99	0.052954189	0.080254804	0.067747459	-1.15433074
M1730	1B	462147666	0.108826425	0.268041237	99	0.052954189	0.080251649	0.067531686	1.115486818
M166	1A	30239863	0.108876107	0.474226804	99	0.052954189	0.080243873	0.065638733	-0.772919405
M9578	4B	544593891	0.108937266	0.268041237	99	0.052954189	0.080234305	0.067188086	-1.053545796
M6061	3A	0	0.109052721	0.092783505	99	0.052954189	0.080216261	0.071174449	-1.765851775
M9918	5A	39747060	0.109113151	0.402061856	99	0.052954189	0.080206824	0.065532564	0.753609104
M5014	2B	765461493	0.109215827	0.350515464	99	0.052954189	0.080190805	0.0663524	0.902453539
M9609	4B	637586800	0.109263148	0.226804124	99	0.052954189	0.080183427	0.06652172	-0.933117524
M5970	2D	0	0.109294009	0.226804124	99	0.052954189	0.080178618	0.067627113	1.132671008
M10949	5B	526866057	0.109495819	0.412371134	99	0.052954189	0.080147205	0.06635521	0.902962619
M14565	7A	83158962	0.109649349	0.371134021	99	0.052954189	0.080123351	0.071561691	1.834328088
M3179	2A	779809063	0.109674023	0.371134021	99	0.052954189	0.080119521	0.066236061	0.88136909
M14823	7A	638524854	0.109690962	0.072164948	99	0.052954189	0.080116892	0.068744659	-1.333316015
M763	1B	15000455	0.109766156	0.422680412	99	0.052954189	0.080105227	0.067878419	1.17788639
M1409	1B	512275631	0.1097796	0.360824742	99	0.052954189	0.080103143	0.06608881	-0.8546649
M4370	2B	0	0.109865323	0.319587629	99	0.052954189	0.080089858	0.066465074	-0.922861867
M7923	3B	168238752	0.109873264	0.484536082	99	0.052954189	0.080088627	0.067369289	-1.086224564
M7313	3B	53963394	0.109878377	0.371134021	99	0.052954189	0.080087835	0.067617223	-1.130890326
M14332	7A	22088450	0.110249758	0.278350515	99	0.052954189	0.080030421	0.065987509	0.836282326
M5232	2B	794002225	0.110272551	0.12371134	99	0.052954189	0.080026904	0.06878699	-1.340894732
M14981	7A	566622348	0.110282032	0.288659794	99	0.052954189	0.080025441	0.066652139	-0.956718931
M2528	2A	42150492	0.110316319	0.453608247	99	0.052954189	0.080020153	0.066049482	-0.847529301
M13682	6B	0	0.110489366	0.175257732	99	0.052954189	0.079993492	0.067227147	-1.060592647
M13855	6D	2074536	0.110497792	0.494845361	99	0.052954189	0.079992195	0.06999354	1.556259156
M2969	2A	703879878	0.110539997	0.051546392	99	0.052954189	0.079985701	0.070224094	-1.597270815
M6081	3A	15086099	0.110547211	0.12371134	99	0.052954189	0.079984591	0.069316388	1.435543905
M578	1A	47290467	0.110556051	0.319587629	99	0.052954189	0.079983231	0.065986008	-0.836009837
M13801	6B	466953416	0.110593252	0.474226804	99	0.052954189	0.079977509	0.066611628	0.949389507
M1089	1B	315459354	0.110662047	0.319587629	99	0.052954189	0.079966934	0.069633935	1.492201561
M12071	6A	0	0.110723559	0.041237113	99	0.052954189	0.079957485	0.072134777	1.935441047
M12082	6A	2837436	0.110723559	0.041237113	99	0.052954189	0.079957485	0.072134777	1.935441047
M931	1B	0	0.110890099	0.463917526	99	0.052954189	0.079931931	0.069381899	1.44723973
M4037	2B	235259300	0.110927495	0.12371134	99	0.052954189	0.079926199	0.06802086	-1.203489765
M570	1A	657508038	0.110948099	0.329896907	99	0.052954189	0.079923042	0.065878084	0.81641477
M11859	5B	703899766	0.111066137	0.474226804	99	0.052954189	0.079904966	0.067941697	-1.189262632
M8881	4A	632945628	0.111171857	0.24742268	99	0.052954189	0.079888796	0.066691566	0.963850848
M9336	4A	0	0.111211394	0.494845361	99	0.052954189	0.079882752	0.066523623	0.933462017
M3687	2B	38782061	0.111305	0.494845361	99	0.052954189	0.079868455	0.066699428	0.965272752
M10112	5A	441668884	0.111305265	0.06185567	99	0.052954189	0.079868414	0.069486989	1.465993802
M3151	2A	0	0.111326672	0.360824742	99	0.052954189	0.079865146	0.0658858	0.8178162
M5252	2B	790887920	0.111351134	0.103092784	99	0.052954189	0.079861413	0.068756821	1.335493637
M3684	2B	440282634	0.111382648	0.06185567	99	0.052954189	0.079856605	0.069998761	1.557188456
M10206	5A	9054221	0.111437204	0.381443299	99	0.052954189	0.079848284	0.06621861	-0.878205358
M6586	3A	662913097	0.111451439	0.391752577	99	0.052954189	0.079846114	0.066454118	0.920877865
M3752	2B	408490253	0.111507144	0.18556701	99	0.052954189	0.079837624	0.067305263	1.074681311
M163	1A	0	0.111586975	0.484536082	99	0.052954189	0.079825466	0.065813434	-0.80467175
M15254	7B	63002454	0.111664341	0.381443299	99	0.052954189	0.079813692	0.066833256	0.98946931
M7148	3B	24929087	0.111680132	0.051546392	99	0.052954189	0.07981129	0.072712698	2.037136477
M6320	3A	434822187	0.111718912	0.391752577	99	0.052954189	0.079805393	0.067116149	1.040564319
M2449	2A	9283046	0.111811373	0.494845361	99	0.052954189	0.079791341	0.071835421	-1.882657475
M566	1A	568938181	0.111818894	0.226804124	99	0.052954189	0.079790199	0.066454819	-0.921004739
M12123	6A	684289	0.111905132	0.494845361	99	0.052954189	0.079777106	0.06586187	0.813470104
M1765	1B	638015288	0.111922764	0.360824742	99	0.052954189	0.079774431	0.069506133	-1.469409166
M12377	6A	64324098	0.111949532	0.175257732	99	0.052954189	0.079770369	0.067093732	-1.036518136
M9159	4A	708532867	0.111988319	0.381443299	99	0.052954189	0.079764487	0.073856017	-2.237533526
M8607	4A	63826057	0.112011684	0.278350515	99	0.052954189	0.079760945	0.066667081	-0.959421945
M8547	4A	381110396	0.112097804	0.350515464	99	0.052954189	0.079747895	0.066054974	-0.848525816
M13550	6B	664092873	0.112264339	0.432989691	99	0.052954189	0.079722691	0.065957996	-0.830924865
M5894	2D	607973170	0.112335478	0.402061856	99	0.052954189	0.079711938	0.069833952	1.527844709
M63	1A	5694880	0.112335478	0.402061856	99	0.052954189	0.079711938	0.069833952	1.527844709
M67	1A	10132814	0.112335478	0.402061856	99	0.052954189	0.079711938	0.069833952	1.527844709
M6059	3A	0	0.112335478	0.402061856	99	0.052954189	0.079711938	0.069833952	-1.527844709
M3029	2A	720450589	0.112435841	0.360824742	99	0.052954189	0.07969678	0.072772464	-2.047637973
M10262	5A	514279828	0.112489463	0.175257732	99	0.052954189	0.079688688	0.067179465	1.051990387
M12116	6A	4266330	0.112598214	0.463917526	99	0.052954189	0.079672289	0.067477497	1.105725152
M12120	6A	0	0.112598214	0.463917526	99	0.052954189	0.079672289	0.067477497	1.105725152
M9065	4A	590854832	0.112634485	0.422680412	99	0.052954189	0.079666823	0.07005198	1.566658989
M9921	5A	39746104	0.112723615	0.216494845	99	0.052954189	0.079653401	0.066868498	0.995838538
M2118	1D	487103554	0.112739127	0.278350515	99	0.052954189	0.079651066	0.06684748	0.992040142
M12573	6A	524836376	0.112935817	0.350515464	99	0.052954189	0.079621493	0.066498271	0.928872509
M14201	7A	556299936	0.112996927	0.268041237	99	0.052954189	0.079612316	0.066676159	0.96106407
M13826	6B	39775683	0.112999883	0.350515464	99	0.052954189	0.079611873	0.066257202	0.885201412
M15275	7B	106140066	0.113144093	0.340206186	99	0.052954189	0.07959024	0.065869657	0.814884277
M9112	4A	701045215	0.113171501	0.092783505	99	0.052954189	0.079586132	0.069904906	-1.540480686
M5193	2B	791958986	0.113194908	0.432989691	99	0.052954189	0.079582625	0.066950713	-1.010692784
M10182	5A	591916968	0.113259658	0.453608247	99	0.052954189	0.079572927	0.067308665	1.075294708
M12522	6A	442087055	0.113299404	0.237113402	99	0.052954189	0.079566977	0.066069543	0.851169326
M12632	6A	0	0.11344892	0.432989691	99	0.052954189	0.079544616	0.066155475	0.866757109
M8477	3D	132061276	0.113731422	0.371134021	99	0.052954189	0.079502455	0.071221102	-1.774108027
M1020	1B	170576130	0.11379159	0.268041237	99	0.052954189	0.079493491	0.067402401	-1.092192883
M15565	7B	647757237	0.113822341	0.309278351	99	0.052954189	0.079488911	0.067852639	-1.173250573
M15531	7B	573692840	0.113822341	0.309278351	99	0.052954189	0.079488911	0.067852639	1.173250573
M15563	7B	646603951	0.113822341	0.309278351	99	0.052954189	0.079488911	0.067852639	1.173250573
M4911	2B	183186233	0.113923386	0.340206186	99	0.052954189	0.079473873	0.068007052	1.201008675
M10686	5B	429836734	0.114040773	0.432989691	99	0.052954189	0.079456422	0.070095365	-1.574377779
M10933	5B	461697041	0.114064437	0.175257732	99	0.052954189	0.079452906	0.067294482	-1.072737178
M15323	7B	337120635	0.114100492	0.319587629	99	0.052954189	0.079447551	0.066300517	-0.893052081
M2795	2A	185345167	0.114139209	0.164948454	99	0.052954189	0.079441803	0.066422976	0.915238018
M8476	3D	568041760	0.114166446	0.474226804	99	0.052954189	0.079437761	0.067372243	-1.086757046
M755	1B	2358221	0.114168497	0.494845361	99	0.052954189	0.079437457	0.06850153	-1.289757657
M12204	6A	11569432	0.114174619	0.072164948	99	0.052954189	0.079436548	0.069244839	1.422766124
M13941	6D	24344203	0.114226078	0.453608247	99	0.052954189	0.079428914	0.06878046	-1.339725725
M5148	2B	0	0.114259848	0.298969072	99	0.052954189	0.079423907	0.066201729	-0.875144679
M6619	3A	686200851	0.11435148	0.24742268	99	0.052954189	0.079410327	0.068459517	1.282225336
M12859	6A	75268104	0.114363635	0.226804124	99	0.052954189	0.079408527	0.067785021	-1.161088635
M8670	4A	633786590	0.114460815	0.12371134	99	0.052954189	0.079394141	0.067819518	-1.167293783
M58	1A	362741398	0.114466486	0.144329897	99	0.052954189	0.079393301	0.067018285	-1.022896731
M7599	3B	0	0.114471982	0.144329897	99	0.052954189	0.079392488	0.066799253	-0.983323149
M6674	3A	707348902	0.114691169	0.350515464	99	0.052954189	0.079360094	0.067092884	1.036364945
M11884	5D	6459997	0.114954612	0.412371134	99	0.052954189	0.07932125	0.066344397	0.901003496
M11662	5B	203695574	0.115056487	0.288659794	99	0.052954189	0.079306256	0.066159586	-0.867502805
M12935	6A	0	0.115057103	0.051546392	99	0.052954189	0.079306165	0.069905326	1.540555467
M2084	1D	52602336	0.115067658	0.216494845	99	0.052954189	0.079304612	0.068842084	1.35075613
M5893	2D	607973170	0.115121692	0.030927835	99	0.052954189	0.079296666	0.072643871	-2.025039257
M11574	5B	596581143	0.115237211	0.216494845	99	0.052954189	0.079279693	0.066514171	-0.931751021
M2127	1D	413406127	0.115487599	0.494845361	99	0.052954189	0.079242967	0.066616282	-0.950231664
M12714	6A	583292509	0.115505148	0.494845361	99	0.052954189	0.079240397	0.067489808	1.107943138
M1496	1B	563066992	0.115557502	0.226804124	99	0.052954189	0.07923273	0.066338325	-0.899903309
M13798	6B	0	0.11566172	0.391752577	99	0.052954189	0.079217481	0.067371552	1.086632448
M12422	6A	54086182	0.115693427	0.350515464	99	0.052954189	0.079212845	0.075564068	-2.534999981
M5445	2D	58775428	0.115725324	0.216494845	99	0.052954189	0.079208182	0.066511881	-0.931336379
M14512	7A	56245466	0.115728477	0.412371134	99	0.052954189	0.079207721	0.070081802	1.571964758
M11565	5B	576348103	0.115888613	0.494845361	99	0.052954189	0.079184335	0.067532942	-1.115713136
M1096	1B	342391060	0.115922209	0.154639175	99	0.052954189	0.079179433	0.067193049	-1.054441323
M1782	1B	644598781	0.115968173	0.226804124	99	0.052954189	0.079172729	0.065985551	0.835926868
M1533	1B	564653541	0.11597173	0.092783505	99	0.052954189	0.079172211	0.068986556	1.37660282
M377	1A	500842238	0.115986568	0.391752577	99	0.052954189	0.079170047	0.069668321	-1.498331517
M7186	3B	825539318	0.115998032	0.360824742	99	0.052954189	0.079168376	0.066253607	0.884549899
M5611	2D	231460780	0.116066289	0.453608247	99	0.052954189	0.079158429	0.066763128	0.976791982
M8071	3B	748377576	0.116080845	0.422680412	99	0.052954189	0.079156309	0.068951048	1.370251998
M4410	2B	124973674	0.11609949	0.298969072	99	0.052954189	0.079153593	0.06759314	-1.126554197
M1798	1B	646777010	0.116531937	0.020618557	99	0.052954189	0.079090748	0.074249544	2.306269945
M10344	5A	568799936	0.116536406	0.051546392	99	0.052954189	0.079090099	0.070384626	1.625800349
M12689	6A	573692004	0.116549544	0.494845361	99	0.052954189	0.079088194	0.067821674	1.167681674
M3563	2B	419250206	0.116618554	0.350515464	99	0.052954189	0.079078191	0.065918882	-0.823823558
M5155	2B	782126877	0.116679665	0.340206186	99	0.052954189	0.079069339	0.068415165	-1.274272147
M15501	7B	0	0.116750551	0.443298969	99	0.052954189	0.079059077	0.06576225	-0.795371689
M9976	5A	593667669	0.116799217	0.463917526	99	0.052954189	0.079052035	0.066267597	-0.887085661
M547	1A	546194412	0.116812975	0.164948454	99	0.052954189	0.079050045	0.066699769	0.965334582
M1588	1B	572257612	0.117018877	0.041237113	99	0.052954189	0.079020295	0.07114887	1.761324119
M116	1A	13940751	0.117119318	0.422680412	99	0.052954189	0.079005803	0.066042601	-0.846280673
M964	1B	65346153	0.117257554	0.463917526	99	0.052954189	0.078985882	0.067064108	1.031170369
M3120	2A	748288850	0.11735572	0.319587629	99	0.052954189	0.078971751	0.065611883	0.76803674
M681	1A	30141081	0.11742471	0.226804124	99	0.052954189	0.078961828	0.066742434	-0.973050225
M6178	3A	348215507	0.117619846	0.12371134	99	0.052954189	0.078933796	0.069200207	1.414793063
M14898	7A	693025273	0.117623807	0.391752577	99	0.052954189	0.078933228	0.066032801	0.84450238
M11844	5B	621241019	0.117625783	0.443298969	99	0.052954189	0.078932944	0.066707472	0.96672766
M14573	7A	82946516	0.117653815	0.237113402	99	0.052954189	0.078928922	0.066654265	-0.957103601
M10666	5B	50528841	0.117712901	0.329896907	99	0.052954189	0.078920447	0.06657538	-0.942830072
M14856	7A	675198673	0.117815955	0.020618557	99	0.052954189	0.078905677	0.07494255	-2.427021218
M11589	5B	584096333	0.117883275	0.082474227	99	0.052954189	0.078896036	0.069064036	-1.390456998
M14294	7A	0	0.117943687	0.360824742	99	0.052954189	0.07888739	0.072676011	2.030688814
M7534	3B	488191801	0.118067499	0.350515464	99	0.052954189	0.078869686	0.068538966	1.296467895
M9769	4D	417815115	0.118112137	0.134020619	99	0.052954189	0.078863308	0.068065424	-1.211496456
M2354	2A	13437988	0.118239631	0.113402062	99	0.052954189	0.078845107	0.069579213	-1.482443995
M11575	5B	4511373	0.118287131	0.484536082	99	0.052954189	0.078838332	0.067942954	1.189488556
M14275	7A	13189977	0.118334774	0.474226804	99	0.052954189	0.078831539	0.067479693	1.106120916
M14281	7A	15080075	0.118334774	0.474226804	99	0.052954189	0.078831539	0.067479693	1.106120916
M7912	3B	289065738	0.118394154	0.237113402	99	0.052954189	0.078823077	0.066620215	-0.950943269
M13765	6B	0	0.118459139	0.360824742	99	0.052954189	0.078813822	0.072536846	2.006220828
M2640	2A	82187693	0.118487702	0.402061856	99	0.052954189	0.078809756	0.069852408	-1.53113202
M15405	7B	509576259	0.118559115	0.12371134	99	0.052954189	0.078799594	0.068518572	-1.292812457
M15356	7B	286275361	0.118559115	0.12371134	99	0.052954189	0.078799594	0.068518572	1.292812457
M1755	1B	632670376	0.118794052	0.494845361	99	0.052954189	0.078766213	0.065263326	-0.704592727
M5789	2D	595557034	0.118816531	0.134020619	99	0.052954189	0.078763023	0.06732272	-1.077829056
M852	1B	0	0.118856163	0.432989691	99	0.052954189	0.078757401	0.067937148	1.188444863
M3762	2B	434731139	0.118861007	0.051546392	99	0.052954189	0.078756714	0.070200724	1.593115834
M2682	2A	9016220	0.119008449	0.144329897	99	0.052954189	0.078735815	0.071547486	-1.83181836
M2153	1D	418529908	0.119047862	0.371134021	99	0.052954189	0.078730234	0.065893124	0.819146164
M3213	2A	650883573	0.119071298	0.144329897	99	0.052954189	0.078726916	0.067600183	1.127822274
M8236	3B	187625882	0.119076182	0.298969072	99	0.052954189	0.078726225	0.06682229	-0.987487225
M5926	2D	608375215	0.119106497	0.18556701	99	0.052954189	0.078721934	0.066900854	-1.001685262
M3734	2B	462272407	0.119123477	0.360824742	99	0.052954189	0.078719532	0.065938616	-0.827406508
M1353	1B	156837503	0.119411026	0.484536082	99	0.052954189	0.078678903	0.068040957	1.207100814
M6048	3A	8645157	0.119460131	0.453608247	99	0.052954189	0.078671976	0.067272096	1.068700179
M1701	1B	453549548	0.119480277	0.298969072	99	0.052954189	0.078669135	0.066054797	0.848493717
M8738	4A	534555874	0.119780804	0.360824742	99	0.052954189	0.078626817	0.065820145	-0.805890934
M10675	5B	153502375	0.119857997	0.381443299	99	0.052954189	0.078615967	0.067072492	1.032683901
M7699	3B	665887152	0.119878802	0.391752577	99	0.052954189	0.078613043	0.071289948	1.786288452
M5448	2D	58726855	0.119897167	0.371134021	99	0.052954189	0.078610464	0.069567483	1.480352088
M6236	3A	24476498	0.119958487	0.268041237	99	0.052954189	0.078601853	0.066066875	0.850685237
M9993	5A	110379087	0.120010571	0.381443299	99	0.052954189	0.078594544	0.066584219	-0.944429755
M516	1A	549282935	0.120070862	0.226804124	99	0.052954189	0.078586086	0.066840305	0.990743353
M11854	5B	696426421	0.12010768	0.432989691	99	0.052954189	0.078580924	0.066653518	0.95696836
M14458	7A	38327804	0.120197956	0.443298969	99	0.052954189	0.078568274	0.067059934	1.030416732
M4415	2B	418106383	0.120220423	0.484536082	99	0.052954189	0.078565128	0.066738162	0.972277773
M4607	2B	0	0.120307607	0.268041237	99	0.052954189	0.078552924	0.066196524	0.874201029
M1575	1B	420600926	0.120355024	0.391752577	99	0.052954189	0.078546291	0.066600476	0.947371542
M9924	5A	43492598	0.120373762	0.041237113	99	0.052954189	0.078543671	0.071345305	-1.796079644
M7620	3B	449114138	0.120447979	0.06185567	99	0.052954189	0.078533296	0.070423123	-1.632638708
M3132	2A	192381627	0.120512858	0.030927835	99	0.052954189	0.078524233	0.072113847	-1.931753058
M11549	5B	563543624	0.120519702	0.195876289	99	0.052954189	0.078523277	0.06647741	-0.9250955
M13963	6D	26988617	0.120645558	0.164948454	99	0.052954189	0.078505712	0.06808625	-1.21523761
M13619	6B	679285878	0.120655166	0.494845361	99	0.052954189	0.078504372	0.067245326	1.063871839
M5651	2D	694059807	0.120869432	0.216494845	99	0.052954189	0.078474519	0.065998072	0.838199586
M4330	2B	361487889	0.120870424	0.494845361	99	0.052954189	0.078474381	0.065754698	-0.793999362
M11475	5B	549587494	0.120917661	0.020618557	99	0.052954189	0.078467808	0.075015261	2.439668992
M12543	6A	112907129	0.120917661	0.020618557	99	0.052954189	0.078467808	0.075015261	-2.439668992
M7110	3B	22915822	0.120917661	0.020618557	99	0.052954189	0.078467808	0.075015261	-2.439668992
M2536	2A	45084253	0.121049885	0.288659794	99	0.052954189	0.078449423	0.068131368	1.223341097
M41	1A	2276875	0.1210969	0.072164948	99	0.052954189	0.078442891	0.06976468	1.515504209
M64	1A	5694880	0.1210969	0.072164948	99	0.052954189	0.078442891	0.06976468	1.515504209
M68	1A	10132814	0.1210969	0.072164948	99	0.052954189	0.078442891	0.06976468	1.515504209
M1314	1B	348861564	0.121107995	0.391752577	99	0.052954189	0.07844135	0.067142329	-1.04528921
M5740	2D	607144225	0.121277894	0.257731959	99	0.052954189	0.078417773	0.066722641	-0.969470953
M4345	2B	157114323	0.121302128	0.474226804	99	0.052954189	0.078414413	0.066631582	-0.952999874
M11592	5B	680236004	0.121385907	0.443298969	99	0.052954189	0.078402803	0.06587511	-0.815874698
M14245	7A	600721014	0.121397102	0.082474227	99	0.052954189	0.078401253	0.069101031	-1.397070235
M4706	2B	711319990	0.121527544	0.474226804	99	0.052954189	0.078383196	0.066012145	0.840753652
M3233	2A	758950183	0.121573379	0.309278351	99	0.052954189	0.078376857	0.069821416	1.525611934
M9127	4A	699458953	0.121673197	0.422680412	99	0.052954189	0.07836306	0.069798021	-1.52144438
M5425	2D	12765246	0.121679071	0.360824742	99	0.052954189	0.078362249	0.072840604	2.059607333
M591	1A	420194142	0.121761049	0.371134021	99	0.052954189	0.078350928	0.065632175	-0.771726933
M5335	2B	789673158	0.121798951	0.443298969	99	0.052954189	0.078345697	0.067510822	-1.111728649
M15582	7B	0	0.121862695	0.082474227	99	0.052954189	0.078336903	0.068883931	-1.358244518
M5615	2D	572257406	0.121944832	0.278350515	99	0.052954189	0.078325579	0.066399936	-0.911064911
M12201	6A	11569432	0.121958981	0.443298969	99	0.052954189	0.07832363	0.067535458	-1.116166281
M9143	4A	304763961	0.121979933	0.319587629	99	0.052954189	0.078320743	0.066385905	-0.908523396
M4417	2B	560269490	0.12226263	0.391752577	99	0.052954189	0.078281848	0.065616175	0.768817301
M2287	1D	0	0.122403979	0.412371134	99	0.052954189	0.078262439	0.065759353	0.794845262
M9988	5A	333414537	0.122419048	0.309278351	99	0.052954189	0.078260371	0.066809338	-0.985146214
M6738	3A	715541796	0.122438991	0.24742268	99	0.052954189	0.078257635	0.066627038	-0.952177789
M8809	4A	601841436	0.12246074	0.422680412	99	0.052954189	0.078254652	0.068485942	1.28696316
M4360	2B	549201886	0.122517224	0.484536082	99	0.052954189	0.078246907	0.067248479	1.06444061
M13191	6B	77434370	0.122587873	0.103092784	99	0.052954189	0.078237225	0.067832242	-1.169582332
M7973	3B	113713782	0.122774008	0.443298969	99	0.052954189	0.078211747	0.066798272	-0.9831458
M10932	5B	616027146	0.122799258	0.329896907	99	0.052954189	0.078208295	0.06618435	-0.871993571
M1901	1B	602910762	0.122856781	0.463917526	99	0.052954189	0.078200432	0.066341365	0.900454049
M2833	2A	177899477	0.122863979	0.12371134	99	0.052954189	0.078199448	0.068827919	-1.348221004
M9391	4A	732814470	0.122914293	0.24742268	99	0.052954189	0.078192574	0.065900875	-0.820553654
M12454	6A	115329227	0.122959673	0.113402062	99	0.052954189	0.078186377	0.0678495	-1.172686114
M1672	1B	628033554	0.122970524	0.18556701	99	0.052954189	0.078184896	0.066994955	-1.018683544
M10022	5A	0	0.123034336	0.24742268	99	0.052954189	0.078176187	0.066780831	-0.979992788
M12251	6A	16598099	0.123160043	0.484536082	99	0.052954189	0.078159046	0.067977517	1.19570084
M2800	2A	296758181	0.123340001	0.092783505	99	0.052954189	0.078134542	0.068432845	-1.277442881
M5898	2D	608405941	0.123377055	0.422680412	99	0.052954189	0.078129502	0.065369826	0.723989854
M4676	2B	595508003	0.123439282	0.484536082	99	0.052954189	0.078121041	0.065858614	-0.812878657
M3721	2B	49874133	0.123564362	0.041237113	99	0.052954189	0.078104048	0.070648365	1.672624569
M7410	3B	70909818	0.123608059	0.237113402	99	0.052954189	0.078098117	0.068031863	1.205466793
M14676	7A	191173951	0.123830958	0.381443299	99	0.052954189	0.078067895	0.066350102	-0.902037182
M12662	6A	178894527	0.123893214	0.402061856	99	0.052954189	0.078059465	0.066141453	-0.864214074
M288	1A	408616656	0.123915497	0.298969072	99	0.052954189	0.078056449	0.066834013	-0.989606213
M8333	3D	38010250	0.123927343	0.381443299	99	0.052954189	0.078054846	0.066650121	-0.956353814
M8327	3D	38148388	0.123950377	0.092783505	99	0.052954189	0.078051729	0.067920142	1.185387848
M3052	2A	726414431	0.124016199	0.195876289	99	0.052954189	0.078042826	0.06694042	1.008833446
M9996	5A	55341971	0.124154857	0.06185567	99	0.052954189	0.078024089	0.069472665	1.463438022
M6989	3B	0	0.124184426	0.474226804	99	0.052954189	0.078020097	0.068365552	1.265373646
M12533	6A	623438271	0.124335906	0.453608247	99	0.052954189	0.077999659	0.068386172	1.269072303
M15187	7B	32548566	0.124338496	0.432989691	99	0.052954189	0.07799931	0.067644936	-1.135879565
M3834	2B	69275351	0.124470934	0.484536082	99	0.052954189	0.077981465	0.067964988	1.193449142
M3529	2B	0	0.12447502	0.412371134	99	0.052954189	0.077980915	0.066022691	0.84266763
M11697	5B	626337103	0.124647478	0.020618557	99	0.052954189	0.07795771	0.075338848	2.495905932
M7787	3B	722479372	0.124650205	0.082474227	99	0.052954189	0.077957344	0.068459497	-1.282221741
M12063	6A	62362905	0.124710468	0.237113402	99	0.052954189	0.077949244	0.067590974	1.126164216
M9028	4A	49368188	0.124714091	0.06185567	99	0.052954189	0.077948757	0.071535295	-1.829664263
M2181	1D	424727025	0.124857111	0.175257732	99	0.052954189	0.077929553	0.072258536	1.957241459
M8128	3B	596885708	0.124857111	0.175257732	99	0.052954189	0.077929553	0.072258536	1.957241459
M2071	1D	46091146	0.124857111	0.175257732	99	0.052954189	0.077929553	0.072258536	-1.957241459
M2074	1D	44261818	0.124857111	0.175257732	99	0.052954189	0.077929553	0.072258536	-1.957241459
M2097	1D	109462418	0.124857111	0.175257732	99	0.052954189	0.077929553	0.072258536	-1.957241459
M2139	1D	688816452	0.124857111	0.175257732	99	0.052954189	0.077929553	0.072258536	-1.957241459
M2171	1D	433030711	0.124857111	0.175257732	99	0.052954189	0.077929553	0.072258536	-1.957241459
M2179	1D	416755450	0.124857111	0.175257732	99	0.052954189	0.077929553	0.072258536	-1.957241459
M6278	3A	41376359	0.124906766	0.195876289	99	0.052954189	0.077922891	0.066769899	0.978016335
M12096	6A	0	0.124947412	0.206185567	99	0.052954189	0.07791744	0.066456307	0.921274287
M8118	3B	800129404	0.125023074	0.020618557	99	0.052954189	0.077907299	0.074386634	2.330186648
M1978	1D	4243757	0.125056788	0.381443299	99	0.052954189	0.077902782	0.066917206	1.004639643
M574	1A	20314237	0.125186217	0.18556701	99	0.052954189	0.077885455	0.066637737	-0.954113425
M9403	4A	0	0.125343392	0.319587629	99	0.052954189	0.077864441	0.06549809	0.747336714
M10845	5B	395681464	0.12539717	0.082474227	99	0.052954189	0.077857258	0.068647201	-1.315861933
M14277	7A	6849511	0.125430761	0.113402062	99	0.052954189	0.077852773	0.06755108	1.118979898
M11979	5D	68534792	0.12549092	0.402061856	99	0.052954189	0.077844744	0.065391405	0.72791863
M14295	7A	50589773	0.125523565	0.041237113	99	0.052954189	0.077840389	0.072967204	2.081835789
M10403	5A	600359375	0.125568249	0.226804124	99	0.052954189	0.07783443	0.066101065	-0.856888195
M13000	6B	14333860	0.125800134	0.484536082	99	0.052954189	0.077803544	0.06618133	-0.87144585
M7850	3B	736666462	0.125804692	0.030927835	99	0.052954189	0.077802938	0.071669025	1.85328603
M4171	2B	223152424	0.125969212	0.432989691	99	0.052954189	0.077781064	0.067613693	-1.130254791
M4144	2B	380453000	0.125985816	0.072164948	99	0.052954189	0.077778858	0.069144356	-1.404813442
M14625	7A	116530515	0.12601232	0.268041237	99	0.052954189	0.077775338	0.066075192	-0.852194333
M2907	2A	21223660	0.126044647	0.371134021	99	0.052954189	0.077771046	0.066599492	-0.94719348
M1282	1B	442620108	0.126050647	0.298969072	99	0.052954189	0.077770249	0.06712766	-1.042641859
M10673	5B	353920901	0.126074652	0.319587629	99	0.052954189	0.077767063	0.066651373	-0.956580447
M4443	2B	661444855	0.126098208	0.309278351	99	0.052954189	0.077763936	0.067213843	1.058192805
M2610	2A	699092314	0.126182703	0.082474227	99	0.052954189	0.077752728	0.067706914	1.147034922
M10832	5B	37974769	0.126206309	0.206185567	99	0.052954189	0.077749598	0.066041555	-0.846090947
M13763	6B	0	0.126207923	0.257731959	99	0.052954189	0.077749384	0.067150858	-1.046828369
M1545	1B	564637524	0.126354174	0.432989691	99	0.052954189	0.077730008	0.065856022	-0.812407807
M3917	2B	160769042	0.126404738	0.237113402	99	0.052954189	0.077723315	0.065692302	0.782658633
M10470	5A	616523857	0.126422083	0.18556701	99	0.052954189	0.07772102	0.067090615	1.035955384
M4686	2B	704429363	0.126615409	0.494845361	99	0.052954189	0.077695462	0.066756363	-0.975568798
M6887	3B	6071524	0.126642769	0.340206186	99	0.052954189	0.077691848	0.071611174	1.843069275
M10721	5B	375463032	0.126658812	0.463917526	99	0.052954189	0.07768973	0.068202641	-1.236138672
M12668	6A	337842296	0.126690286	0.175257732	99	0.052954189	0.077685575	0.067274603	-1.069152183
M15215	7B	0	0.126712599	0.175257732	99	0.052954189	0.07768263	0.067614011	-1.130312149
M5035	2B	767121912	0.126756218	0.453608247	99	0.052954189	0.077676874	0.066072848	-0.851769026
M1407	1B	512275631	0.126793016	0.319587629	99	0.052954189	0.07767202	0.066686996	0.963024292
M15456	7B	584314006	0.126933392	0.371134021	99	0.052954189	0.077653519	0.065956556	-0.830663576
M10910	5B	438017304	0.127129124	0.422680412	99	0.052954189	0.077627761	0.066498862	0.928979547
M8800	4A	602863944	0.127138228	0.030927835	99	0.052954189	0.077626564	0.072400066	-1.98215694
M11995	5D	548844664	0.127166855	0.391752577	99	0.052954189	0.0776228	0.065814531	-0.804871033
M9948	5A	46628073	0.127178414	0.412371134	99	0.052954189	0.077621281	0.066434706	-0.91736243
M12884	6A	0	0.127202818	0.453608247	99	0.052954189	0.077618074	0.06645776	-0.921537412
M1371	1B	405488003	0.127287577	0.391752577	99	0.052954189	0.077606941	0.069357428	-1.442871372
M15485	7B	600720209	0.127300965	0.412371134	99	0.052954189	0.077605183	0.068615632	-1.310206238
M1731	1B	636679505	0.12757242	0.257731959	99	0.052954189	0.077569588	0.067723659	-1.150048274
M5454	2D	58726921	0.127595936	0.329896907	99	0.052954189	0.077566508	0.068455697	-1.281540404
[truncated: 13,601 more rows]
