# Supplementary material for: Genome-wide association study of drought tolerance and biomass allocation in wheat
Source: PLoS One. 2019 Dec 4;14(12):e0225383. doi: 10.1371/journal.pone.0225383 (PMC6892492; doi:10.1371/journal.pone.0225383)
Supplement: S4 Table — (CSV) [file pone.0225383.s004.csv]

SNP	Chromosome	Position	P.value	maf	nobs	Rsquare.of.Model.without.SNP	Rsquare.of.Model.with.SNP	FDR_Adjusted_P-values	effect
M9428	4A	733792535	0.000326135	0.329896907	99	0.270800424	0.382732719	0.045130869	2.810820181
M1626	1B	614701448	0.000405505	0.144329897	99	0.270800424	0.37895013	0.017294249	3.061135421
M892	1B	12505139	0.000597142	0.319587629	99	0.270800424	0.372289658	0.044626342	-5.253144082
M5902	2D	606129207	0.000611422	0.463917526	99	0.270800424	0.371885475	0.038219779	-3.173429198
M7970	3B	95564668	0.000672855	0.453608247	99	0.270800424	0.370250991	0.021920906	2.048516645
M8019	3B	765843802	0.000821192	0.113402062	99	0.270800424	0.366865329	0.047061698	3.059418908
M7199	2B	157603272	0.000841418	0.12371134	99	0.270800424	0.36645328	0.038308308	-2.926957706
M8011	3B	533130365	0.000914534	0.134020619	99	0.270800424	0.365044559	0.048406633	2.972869545
M7428	3B	303590858	0.00127514	0.154639175	99	0.270800424	0.359462187	0.031039217	2.303517981
M11124	5B	698209017	0.001324859	0.402061856	99	0.270800424	0.358823643	0.088615959	2.628036542
M14516	7A	57742411	0.001362684	0.391752577	99	0.270800424	0.358354227	0.058474101	1.830582749
M1476	1B	544133182	0.001401054	0.257731959	99	0.270800424	0.357891598	0.069579275	3.404152395
M4551	2B	565077064	0.001456625	0.268041237	99	0.270800424	0.357244268	0.065275142	3.192541747
M6724	3A	715199344	0.001467451	0.443298969	99	0.270800424	0.357121141	0.063363087	-1.887754959
M7090	3B	22917259	0.001524043	0.06185567	99	0.270800424	0.356492366	0.018583702	-4.120903618
M9240	4A	727965119	0.00170249	0.350515464	99	0.270800424	0.354657044	0.047397118	2.071914361
M9230	4A	14039828	0.001710693	0.484536082	99	0.270800424	0.354577529	0.053639168	-1.704395537
M2096	1D	366012746	0.001727691	0.443298969	99	0.270800424	0.354414001	0.110019478	-3.859058203
M12765	6A	596176929	0.00196249	0.195876289	99	0.270800424	0.352311333	0.028803593	2.597256533
M3693	2B	68579934	0.002072856	0.319587629	99	0.270800424	0.351411336	0.054310414	3.170332077
M39	1A	2236676	0.002206178	0.268041237	99	0.270800424	0.350388044	0.042021591	3.112819227
M7089	3B	22917259	0.002300553	0.103092784	99	0.270800424	0.349701645	0.016022101	3.217851186
M14913	7A	699146276	0.002377846	0.371134021	99	0.270800424	0.349160855	0.041769792	2.408561487
M15540	7B	642273695	0.002409408	0.164948454	99	0.270800424	0.348945238	0.017279127	-2.271571486
M1627	1B	144111278	0.002665044	0.432989691	99	0.270800424	0.347299647	0.058001689	3.212994287
M10277	5A	551446643	0.002719679	0.144329897	99	0.270800424	0.346969193	0.016414061	2.783683702
M14468	7A	60679438	0.002817319	0.278350515	99	0.270800424	0.3463954	0.03349348	3.051032371
M1232	1B	86102631	0.002885813	0.257731959	99	0.270800424	0.34600505	0.027641548	2.785510676
M6057	3A	8862385	0.003002585	0.195876289	99	0.270800424	0.345361188	0.014737991	-2.033266326
M4459	2B	649949245	0.003114927	0.412371134	99	0.270800424	0.344765787	0.04370103	-2.970939195
M12485	6A	317623793	0.003195543	0.329896907	99	0.270800424	0.344352086	0.028516239	2.48600035
M12238	6A	71414592	0.003246535	0.298969072	99	0.270800424	0.344095956	0.03236845	3.163430171
M13333	6B	218963791	0.003309648	0.432989691	99	0.270800424	0.343784657	0.038646082	-2.658595597
M11411	5B	368680383	0.003461695	0.216494845	99	0.270800424	0.343059292	0.012127984	1.74530898
M3807	2B	157603272	0.003736686	0.268041237	99	0.270800424	0.341827597	0.019297878	2.421235808
M3910	2B	976743	0.003767466	0.494845361	99	0.270800424	0.341695624	0.030358727	2.080203655
M702	1B	3572450	0.003845865	0.319587629	99	0.270800424	0.341364462	0.020780355	-2.250606348
M12506	6A	266941848	0.003896286	0.134020619	99	0.270800424	0.341155162	0.008481286	2.219133415
M11995	5D	548844664	0.004113377	0.391752577	99	0.270800424	0.340285004	0.020310016	-1.919284974
M4842	2B	601567299	0.004223168	0.226804124	99	0.270800424	0.339862915	0.013468213	-2.257043176
M13392	6B	306262708	0.004305387	0.309278351	99	0.270800424	0.339554218	0.016561966	-2.074994846
M1785	1B	646178482	0.004482838	0.268041237	99	0.270800424	0.338908319	0.012713553	1.913642646
M11128	5B	515039938	0.004517631	0.381443299	99	0.270800424	0.338784793	0.019040447	2.02955313
M8265	3D	14857937	0.00458244	0.24742268	99	0.270800424	0.338557313	0.011162868	1.860696899
M8414	3D	538560131	0.004790565	0.484536082	99	0.270800424	0.337848771	0.024176173	2.151248978
M1548	1B	0	0.004846172	0.06185567	99	0.270800424	0.33766487	0.003840126	-2.707742326
M6540	3A	662527377	0.005258674	0.288659794	99	0.270800424	0.336365526	0.010386864	-1.703008927
M4628	2B	689711741	0.005325467	0.412371134	99	0.270800424	0.336165144	0.015524627	-1.804401206
M4218	2B	34735773	0.005367301	0.164948454	99	0.270800424	0.336040964	0.009548423	-2.796287714
M698	1A	491804002	0.005464872	0.298969072	99	0.270800424	0.335755205	0.01336208	2.198215788
M8940	4A	673929919	0.005529083	0.175257732	99	0.270800424	0.33557003	0.00664302	-1.886183518
M8035	3B	768723678	0.005596599	0.164948454	99	0.270800424	0.335377718	0.007132178	2.177913414
M2286	1D	0	0.005682941	0.474226804	99	0.270800424	0.335135268	0.021256591	2.292573099
M354	1A	485228466	0.005924844	0.113402062	99	0.270800424	0.334475882	0.004855253	-2.283023219
M11413	5B	233925191	0.005952598	0.206185567	99	0.270800424	0.334402026	0.006282138	-1.632293529
M13574	6B	667201097	0.005981132	0.432989691	99	0.270800424	0.334326467	0.014644266	-1.820605949
M9239	4A	727965119	0.006006619	0.340206186	99	0.270800424	0.334259295	0.011773774	1.870880601
M8042	3B	228195974	0.006094191	0.288659794	99	0.270800424	0.334030727	0.012825186	2.436890347
M6195	3A	22831857	0.006133401	0.082474227	99	0.270800424	0.333929494	0.003399255	-2.275146245
M8765	4A	597058372	0.006159714	0.381443299	99	0.270800424	0.333861936	0.023435295	3.405990813
M11162	5B	492257250	0.006205755	0.402061856	99	0.270800424	0.333744443	0.019946223	-2.770798574
M851	1B	0	0.006243967	0.319587629	99	0.270800424	0.333647616	0.009423344	-1.65698366
M5801	2D	729134384	0.006281548	0.329896907	99	0.270800424	0.333552989	0.020045792	3.435217008
M8189	3B	0	0.006306501	0.164948454	99	0.270800424	0.333490484	0.006517426	2.242636106
M6619	3A	686200851	0.006311497	0.24742268	99	0.270800424	0.333477999	0.012053123	2.767164437
M4754	2B	600038125	0.006365066	0.360824742	99	0.270800424	0.333344787	0.014345346	-2.277509006
M11147	5B	529048297	0.00641013	0.257731959	99	0.270800424	0.333233624	0.008659739	-1.938410979
M14019	6D	9514548	0.006519806	0.443298969	99	0.270800424	0.332966442	0.018812681	-2.490182544
M9137	4A	23511186	0.006521606	0.443298969	99	0.270800424	0.332962098	0.024630137	3.261122718
M11985	5D	548463362	0.006616885	0.06185567	99	0.270800424	0.332733823	0.003722433	-3.583797224
M7485	3B	495521725	0.006711991	0.051546392	99	0.270800424	0.332509352	0.002689902	3.152333001
M6093	3A	13812131	0.006803437	0.422680412	99	0.270800424	0.332296623	0.013187633	1.910405617
M9088	4A	697825160	0.006850018	0.144329897	99	0.270800424	0.332189403	0.006330329	-2.703984541
M10883	5B	520209151	0.006894032	0.340206186	99	0.270800424	0.332088787	0.0090672	1.653662271
M4786	2B	734672774	0.006926828	0.381443299	99	0.270800424	0.33201425	0.009962331	-1.628200523
M5028	2B	758922449	0.006959409	0.422680412	99	0.270800424	0.331940566	0.018131084	2.686745265
M13641	6B	457635925	0.006961572	0.432989691	99	0.270800424	0.331935686	0.011296621	-1.634635133
M6176	3A	20238715	0.006987745	0.453608247	99	0.270800424	0.331876772	0.012756483	1.768599712
M7194	3B	35451949	0.007016822	0.484536082	99	0.270800424	0.331811589	0.01463715	-1.90771459
M788	1B	81660700	0.007154323	0.298969072	99	0.270800424	0.331507117	0.008231391	1.772792856
M5706	2D	591603469	0.007157191	0.371134021	99	0.270800424	0.331500831	0.015209229	2.639742448
M8090	3B	795540049	0.007233362	0.443298969	99	0.270800424	0.331334845	0.016813578	2.469142341
M1168	1B	34945936	0.00724471	0.082474227	99	0.270800424	0.331310272	0.003432339	2.713535209
M402	1A	939984	0.007304387	0.484536082	99	0.270800424	0.331181706	0.01601511	2.172851617
M5719	2D	0	0.007351081	0.12371134	99	0.270800424	0.331081869	0.003921238	2.097043365
M9222	4A	720689979	0.007403358	0.278350515	99	0.270800424	0.330970877	0.007014934	1.679201503
M750	1B	12374383	0.007525887	0.350515464	99	0.270800424	0.3307139	0.010138996	-1.959241332
M1637	1B	601383349	0.007541701	0.484536082	99	0.270800424	0.33068105	0.013486154	1.889182079
M15077	7A	712982088	0.007589598	0.268041237	99	0.270800424	0.330581998	0.006913482	-1.761799403
M6193	3A	220131274	0.007641445	0.051546392	99	0.270800424	0.330475506	0.001995761	2.662737424
M8863	4A	12656052	0.007673811	0.391752577	99	0.270800424	0.330409409	0.016929327	-2.984567631
M9073	4A	641838580	0.00768519	0.113402062	99	0.270800424	0.330386239	0.004673917	2.850737024
M4179	2B	75627521	0.007700106	0.360824742	99	0.270800424	0.330355923	0.014494468	-2.783845972
M5903	2D	612184445	0.007726892	0.402061856	99	0.270800424	0.330301635	0.017276397	-2.98818624
M12126	6A	5129543	0.007731559	0.494845361	99	0.270800424	0.330292195	0.012211616	1.717169767
M697	1A	491804002	0.007743272	0.463917526	99	0.270800424	0.330268532	0.016052548	-2.411405551
M5883	2D	605883075	0.007858548	0.381443299	99	0.270800424	0.33003762	0.015811209	2.931702698
M8005	3B	0	0.007928722	0.072164948	99	0.270800424	0.329898777	0.002824762	2.793194834
M7533	3B	488191801	0.007936339	0.113402062	99	0.270800424	0.329883783	0.002897652	-1.825105569
M2168	1D	423928525	0.008037265	0.371134021	99	0.270800424	0.32968652	0.008757934	1.706953563
M14337	7A	21081193	0.008180973	0.371134021	99	0.270800424	0.329410051	0.017860453	3.543310441
M11972	5D	531606683	0.008217473	0.484536082	99	0.270800424	0.329340639	0.010922346	1.667134312
M7697	3B	669426645	0.008415202	0.422680412	99	0.270800424	0.328970115	0.009614723	-1.722787501
M1632	1B	587501291	0.008489457	0.206185567	99	0.270800424	0.328833309	0.005331816	1.975783317
M9750	4D	95663405	0.008543125	0.092783505	99	0.270800424	0.328735209	0.00294783	2.442817083
M2116	1D	472550886	0.008544684	0.340206186	99	0.270800424	0.328732368	0.008915303	-2.015266061
M8706	4A	25985745	0.008577188	0.051546392	99	0.270800424	0.328673276	0.002155733	-3.228376298
M6417	3A	512556910	0.008584872	0.309278351	99	0.270800424	0.32865934	0.01931502	-4.82527425
M4217	2B	34735773	0.008594188	0.216494845	99	0.270800424	0.328642463	0.004949195	1.768212214
M9119	4A	25288905	0.008691764	0.371134021	99	0.270800424	0.328466826	0.019894691	-4.193308985
M3928	2B	180555363	0.008714109	0.103092784	99	0.270800424	0.328426895	0.003031489	2.306179716
M13576	6B	667201097	0.008965024	0.360824742	99	0.270800424	0.327985697	0.009123886	-2.040222232
M5663	2D	725913205	0.008967548	0.494845361	99	0.270800424	0.327981324	0.012452148	2.030911525
M11079	5B	505694656	0.008984034	0.288659794	99	0.270800424	0.327952798	0.00808074	-2.263490776
M6846	3A	329077007	0.009083213	0.329896907	99	0.270800424	0.327782323	0.006638561	1.645044674
M773	1B	89404769	0.009161853	0.195876289	99	0.270800424	0.327648528	0.004547645	1.914390387
M8924	4A	50074687	0.009435126	0.041237113	99	0.270800424	0.327192744	0.001656981	-3.412082655
M1668	1B	615019866	0.009539416	0.463917526	99	0.270800424	0.327022426	0.011156181	2.064614927
M15545	7B	641684991	0.009678497	0.474226804	99	0.270800424	0.326798289	0.015128436	2.778806926
M6612	3A	681663202	0.009695328	0.463917526	99	0.270800424	0.326771395	0.009705322	1.82546779
M4654	2B	602009444	0.00983201	0.381443299	99	0.270800424	0.326554769	0.00732346	-1.698913074
M14718	7A	90552202	0.010000223	0.298969072	99	0.270800424	0.326292449	0.005541126	-1.668107307
M8660	4A	321099074	0.010080409	0.082474227	99	0.270800424	0.326169022	0.002032651	-2.235966117
M9309	4A	719934001	0.010136857	0.350515464	99	0.270800424	0.326082747	0.007323408	-1.906127181
M11177	5B	0	0.010252898	0.06185567	99	0.270800424	0.325906956	0.002280391	3.401880463
M13287	6B	230607608	0.01037966	0.432989691	99	0.270800424	0.325717284	0.008792204	-1.896906211
M1338	1B	380472532	0.010451964	0.402061856	99	0.270800424	0.325610179	0.008253323	1.930973807
M9235	4A	716789227	0.01045485	0.402061856	99	0.270800424	0.32560592	0.007774551	1.819461041
M4730	2B	726768764	0.010476332	0.422680412	99	0.270800424	0.325574256	0.010781673	-2.405059468
M11704	5B	644347628	0.010591376	0.443298969	99	0.270800424	0.325405833	0.010990688	-2.363322784
M7427	3B	303590858	0.010648657	0.18556701	99	0.270800424	0.325322687	0.003130461	-1.616757417
M9560	4B	588905379	0.010705236	0.06185567	99	0.270800424	0.325241016	0.001612365	2.51143956
M4365	2B	135437600	0.010853158	0.072164948	99	0.270800424	0.325029609	0.002246484	3.040714613
M5881	2D	601401117	0.010895261	0.329896907	99	0.270800424	0.324969987	0.006349589	-1.887328738
M14108	6D	463784578	0.010938115	0.484536082	99	0.270800424	0.324909548	0.010393544	2.111652916
M1565	1B	592833254	0.011032475	0.474226804	99	0.270800424	0.324777338	0.006831635	-1.430388552
M833	1B	21523277	0.011114452	0.329896907	99	0.270800424	0.324663433	0.010359032	3.141025649
M13945	6D	95444739	0.011133636	0.402061856	99	0.270800424	0.324636904	0.012721907	3.17058119
M10447	5A	612915484	0.011149994	0.474226804	99	0.270800424	0.324614322	0.011384749	2.409098061
M10510	5A	680512404	0.011228344	0.175257732	99	0.270800424	0.324506633	0.00418928	-2.41557462
M15020	7A	712493182	0.011311759	0.206185567	99	0.270800424	0.324392845	0.003766531	1.859756054
M8008	3B	493706157	0.011382633	0.072164948	99	0.270800424	0.324296851	0.001838559	-2.609975968
M9150	4A	22270015	0.011425485	0.381443299	99	0.270800424	0.324239114	0.014621245	3.941590658
M2812	2A	166864123	0.011458669	0.041237113	99	0.270800424	0.324194558	0.001361814	3.405698963
M5541	2D	530255014	0.011511386	0.381443299	99	0.270800424	0.324124054	0.007038595	1.911728086
M3855	2B	69509022	0.011552373	0.309278351	99	0.270800424	0.32406947	0.005396581	1.814190481
M9936	5A	79280510	0.011559217	0.402061856	99	0.270800424	0.324060375	0.011201041	2.898253994
M10484	5A	653716640	0.011659742	0.340206186	99	0.270800424	0.323927437	0.010371665	-3.1991731
M13812	6B	715980875	0.0116736	0.298969072	99	0.270800424	0.323909206	0.009182701	-3.226944392
M8118	3B	800129404	0.011733368	0.020618557	99	0.270800424	0.32383083	0.000852674	-4.367067695
M14410	7A	31106605	0.011933732	0.371134021	99	0.270800424	0.323571105	0.011627298	3.364858867
M7722	3B	675281060	0.012027562	0.082474227	99	0.270800424	0.323451042	0.001957281	2.568946009
M4616	2B	91473909	0.01203363	0.216494845	99	0.270800424	0.323443312	0.003505703	1.753746163
M13716	6B	0	0.01205847	0.402061856	99	0.270800424	0.323411707	0.008299387	-2.240205513
M4155	2B	107028709	0.012124749	0.381443299	99	0.270800424	0.323327713	0.011526404	3.29745666
M9231	4A	26495448	0.012187832	0.360824742	99	0.270800424	0.323248213	0.0056656	1.722338807
M11749	5B	678159647	0.012352445	0.288659794	99	0.270800424	0.323042775	0.003990149	-1.536732332
M11954	5D	543270056	0.012698605	0.350515464	99	0.270800424	0.32261996	0.013419431	4.375477247
M12466	6A	113174438	0.012742207	0.082474227	99	0.270800424	0.32256756	0.001714355	2.383799575
M9014	4A	212069460	0.012770347	0.350515464	99	0.270800424	0.322533841	0.004285269	-1.40512867
M3435	2B	15951770	0.012785368	0.329896907	99	0.270800424	0.322515874	0.005598009	-1.952590178
M9114	4A	701293979	0.012789058	0.12371134	99	0.270800424	0.322511464	0.002827966	2.631150441
M9112	4A	701045215	0.012936689	0.092783505	99	0.270800424	0.322336102	0.002651805	-3.327641132
M4049	2B	574509277	0.01303068	0.412371134	99	0.270800424	0.322225544	0.00534822	-1.521004823
M5276	2B	792988297	0.013075708	0.164948454	99	0.270800424	0.322172875	0.002915669	2.080164574
M3664	2B	59764104	0.013082105	0.051546392	99	0.270800424	0.322165408	0.001460894	-3.336880592
M5250	2B	765677047	0.013111482	0.360824742	99	0.270800424	0.322131166	0.008687848	2.841254697
M1769	1B	64478551	0.013118028	0.12371134	99	0.270800424	0.322123546	0.002058911	1.964893643
M8754	4A	570267519	0.013121244	0.237113402	99	0.270800424	0.322119804	0.003272577	-1.629863676
M726	1B	3164636	0.013244077	0.195876289	99	0.270800424	0.321977604	0.003417921	2.079909139
M6186	3A	320920365	0.013296262	0.402061856	99	0.270800424	0.32191761	0.009783842	-2.911981496
M473	1A	544077560	0.01331245	0.463917526	99	0.270800424	0.321899049	0.006386351	1.649348785
M1357	1B	7319459	0.013447919	0.164948454	99	0.270800424	0.321744646	0.002641008	-1.937845294
M11751	5B	679651559	0.013514274	0.134020619	99	0.270800424	0.32166961	0.002049154	1.859679635
M9077	4A	691165574	0.013527333	0.288659794	99	0.270800424	0.321654888	0.010148348	4.280197071
M6427	3A	517095336	0.013606837	0.103092784	99	0.270800424	0.32156558	0.002315239	-2.750219442
M6069	3A	12934993	0.013646467	0.371134021	99	0.270800424	0.321521268	0.004838226	1.60109863
M774	1B	89404769	0.013714402	0.237113402	99	0.270800424	0.321445618	0.004790651	-2.493778099
M7701	3B	675030662	0.013757516	0.381443299	99	0.270800424	0.321397812	0.009609909	-3.119405644
M2223	1D	372520833	0.013772968	0.422680412	99	0.270800424	0.321380717	0.006073964	-1.781271542
M9456	4B	0	0.013803073	0.092783505	99	0.270800424	0.321347467	0.001669361	-2.235103699
M3515	2B	26885100	0.01397602	0.360824742	99	0.270800424	0.321157917	0.005562466	-1.939086101
M4442	2B	640489568	0.014129906	0.371134021	99	0.270800424	0.320991316	0.009078386	3.110710953
M7900	3B	752274170	0.014189216	0.371134021	99	0.270800424	0.320927612	0.009365393	-3.222523954
M7949	3B	0	0.014189216	0.371134021	99	0.270800424	0.320927612	0.009365393	-3.222523954
M8337	3D	48663994	0.014236636	0.463917526	99	0.270800424	0.320876879	0.005340537	1.475006825
M1798	1B	646777010	0.014280389	0.020618557	99	0.270800424	0.320830228	0.000619894	-3.864037825
M6079	3A	0	0.014400185	0.412371134	99	0.270800424	0.320703257	0.008476702	2.664092248
M11291	5B	432894116	0.014521504	0.092783505	99	0.270800424	0.320575796	0.002107371	2.968413097
M7106	3B	21863643	0.014595049	0.24742268	99	0.270800424	0.32049907	0.004828463	2.56340641
M6820	3A	727518767	0.014620965	0.092783505	99	0.270800424	0.32047213	0.001525034	-2.162853772
M471	1A	520328681	0.014633528	0.206185567	99	0.270800424	0.320459089	0.002868364	1.832177574
M11695	5B	0	0.014700339	0.371134021	99	0.270800424	0.320389931	0.005988576	-2.134826839
M9133	4A	236257089	0.014708378	0.443298969	99	0.270800424	0.320381631	0.009651263	-2.88200501
M8601	4A	93968043	0.014787738	0.350515464	99	0.270800424	0.320299957	0.00523725	1.988567497
M10742	5B	356684358	0.014840865	0.319587629	99	0.270800424	0.320245536	0.01178992	-4.927454647
M13562	6B	322479776	0.014849865	0.474226804	99	0.270800424	0.320236337	0.007124732	-2.007924966
M9145	4A	364049164	0.014870729	0.443298969	99	0.270800424	0.320215036	0.007628308	-2.303065402
M11081	5B	529496598	0.015042516	0.226804124	99	0.270800424	0.320040823	0.003464435	2.067971329
M7882	3B	740106785	0.015235251	0.092783505	99	0.270800424	0.319847835	0.00134177	-1.982893475
M5233	2B	794002225	0.015291393	0.319587629	99	0.270800424	0.3197921	0.005122653	2.205944192
M7363	3B	74176759	0.015498252	0.144329897	99	0.270800424	0.319588582	0.002004825	-1.937516406
M485	1A	339729738	0.015618157	0.195876289	99	0.270800424	0.319471915	0.003427145	2.459364467
M4159	2B	154633225	0.015658773	0.494845361	99	0.270800424	0.319432609	0.007773509	2.213848329
M9224	4A	721826580	0.015792864	0.494845361	99	0.270800424	0.319303599	0.006717373	-1.929449101
M5249	2B	765677047	0.015889964	0.030927835	99	0.270800424	0.319210895	0.000827585	-3.826735245
M14533	7A	68211926	0.016085466	0.381443299	99	0.270800424	0.319026033	0.006983639	-2.650500705
M7347	3B	444842198	0.016117123	0.432989691	99	0.270800424	0.318996321	0.007617325	2.551849081
M9062	4A	4271248	0.01616411	0.453608247	99	0.270800424	0.318952335	0.008541345	-2.739300241
M2501	2A	36404881	0.016164584	0.402061856	99	0.270800424	0.318951892	0.006954476	2.516393756
M10864	5B	422121027	0.016217037	0.360824742	99	0.270800424	0.318902947	0.00925641	3.744210747
M13302	6B	158998373	0.016284198	0.391752577	99	0.270800424	0.318840521	0.004400867	1.646399732
M13382	6B	449771887	0.016417459	0.24742268	99	0.270800424	0.318717452	0.002541402	1.517687223
M10829	5B	397682273	0.01642335	0.319587629	99	0.270800424	0.318712036	0.005417793	2.50574424
M5262	2B	765884956	0.016554607	0.24742268	99	0.270800424	0.318591885	0.002791338	-1.680870471
M6680	3A	709595134	0.01656195	0.113402062	99	0.270800424	0.318585192	0.001477964	-1.942659868
M6017	3A	717909949	0.016745844	0.422680412	99	0.270800424	0.318418608	0.005128211	-1.828534995
M12673	6A	125507757	0.016783688	0.134020619	99	0.270800424	0.318384565	0.001651078	-1.860912643
M1655	1B	589090638	0.016853517	0.288659794	99	0.270800424	0.31832196	0.003446492	1.811023135
M13596	6B	47980535	0.016891344	0.371134021	99	0.270800424	0.318288161	0.003843743	-1.57445512
M11963	5D	531606683	0.016919211	0.309278351	99	0.270800424	0.318263311	0.00312467	-1.538428123
M11770	5B	683000490	0.016923325	0.381443299	99	0.270800424	0.318259647	0.008686082	-3.468343792
M11743	5B	680852435	0.016923325	0.381443299	99	0.270800424	0.318259647	0.008686082	3.468343792
M15180	7B	25642597	0.017160412	0.164948454	99	0.270800424	0.318050011	0.002502952	-2.343551216
M7636	3B	589458224	0.017350738	0.082474227	99	0.270800424	0.317883913	0.001423666	-2.695568943
M4710	2B	711866548	0.017598778	0.494845361	99	0.270800424	0.317670301	0.006807729	2.179002682
M9151	4A	441240399	0.017601511	0.12371134	99	0.270800424	0.317667965	0.001615774	2.069015242
M14097	6D	461702450	0.017642979	0.020618557	99	0.270800424	0.317632568	0.000643676	4.95704924
M14162	7A	150861541	0.017642979	0.020618557	99	0.270800424	0.317632568	0.000643676	4.95704924
M5909	2D	615707186	0.017657123	0.391752577	99	0.270800424	0.317620514	0.008832309	-3.582818533
M8852	4A	111059555	0.017857666	0.278350515	99	0.270800424	0.317450697	0.002577281	1.488116381
M9755	4D	220375714	0.017904893	0.402061856	99	0.270800424	0.317410998	0.007703803	-3.087639355
M6788	3A	519467461	0.017911406	0.432989691	99	0.270800424	0.317405532	0.006458575	-2.404536242
M2617	2A	355706503	0.017930042	0.432989691	99	0.270800424	0.317389902	0.004944016	1.842578922
M15174	7B	10160995	0.018010124	0.154639175	99	0.270800424	0.317322935	0.002249207	-2.35759427
M15184	7B	80326304	0.018010124	0.154639175	99	0.270800424	0.317322935	0.002249207	2.35759427
M11750	5B	678159647	0.018016273	0.226804124	99	0.270800424	0.317317805	0.001987504	1.420903351
M12491	6A	440255570	0.018031311	0.092783505	99	0.270800424	0.31730527	0.001388928	-2.429285953
M13563	6B	663760681	0.018060378	0.041237113	99	0.270800424	0.317281071	0.000934818	-3.684750479
M8123	3B	322735845	0.018112376	0.381443299	99	0.270800424	0.317237882	0.008597101	3.674006781
M6719	3A	714455841	0.018134673	0.371134021	99	0.270800424	0.317219402	0.003425729	-1.506518483
M8266	3D	14857937	0.018274695	0.072164948	99	0.270800424	0.317103897	0.000934794	-2.130504104
M14495	7A	55362389	0.018323997	0.319587629	99	0.270800424	0.317063449	0.002711173	-1.399039552
M601	1A	566369413	0.018351932	0.329896907	99	0.270800424	0.317040581	0.003084756	-1.544425327
M11753	5B	678708672	0.018533106	0.371134021	99	0.270800424	0.316893157	0.008153203	-3.664276334
M11794	5B	656472011	0.018533106	0.371134021	99	0.270800424	0.316893157	0.008153203	-3.664276334
M11761	5B	681979338	0.018533106	0.371134021	99	0.270800424	0.316893157	0.008153203	3.664276334
M11787	5B	688224445	0.018533106	0.371134021	99	0.270800424	0.316893157	0.008153203	3.664276334
M9100	4A	220162554	0.018730619	0.432989691	99	0.270800424	0.316734155	0.005797221	-2.257027999
M10850	5B	664263082	0.018773701	0.030927835	99	0.270800424	0.316699707	0.000668821	3.653865443
M6687	3A	420562185	0.018867055	0.381443299	99	0.270800424	0.316625348	0.004431497	1.972727365
M9506	4B	449189961	0.019102025	0.371134021	99	0.270800424	0.316439889	0.002700431	-1.250904779
M10715	5B	75319717	0.019564715	0.18556701	99	0.270800424	0.316081615	0.00181633	-1.723495189
M13108	6B	24914373	0.019672375	0.175257732	99	0.270800424	0.31599953	0.001631551	-1.648249118
M12318	6A	17587956	0.019733604	0.010309278	99	0.270800424	0.315953058	0.000357621	6.160894317
M13879	6D	5046755	0.019733604	0.010309278	99	0.270800424	0.315953058	0.000357621	6.160894317
M1762	1B	639941356	0.019733604	0.010309278	99	0.270800424	0.315953058	0.000357621	6.160894317
M12324	6A	19266268	0.019733604	0.010309278	99	0.270800424	0.315953058	0.000357621	-6.160894317
M3603	2B	162967131	0.019733604	0.010309278	99	0.270800424	0.315953058	0.000357621	-6.160894317
M1996	1D	8818793	0.019958829	0.371134021	99	0.270800424	0.315783409	0.003899101	1.887171165
M12005	5D	552916927	0.020178826	0.432989691	99	0.270800424	0.315619635	0.00410431	1.721476006
M10876	5B	524047080	0.020243053	0.288659794	99	0.270800424	0.315572176	0.002968582	1.873619101
M14169	7A	11374457	0.020248345	0.329896907	99	0.270800424	0.315568273	0.005784847	-3.195550176
M10968	5B	393940604	0.020331012	0.340206186	99	0.270800424	0.315507439	0.002703462	1.45405101
M8133	3B	303789579	0.020444033	0.371134021	99	0.270800424	0.315424688	0.003518215	-1.744217763
M10001	5A	394754024	0.020482271	0.288659794	99	0.270800424	0.3153968	0.001949975	1.245269347
M2537	2A	0	0.020571888	0.463917526	99	0.270800424	0.315331656	0.004741046	-1.892126049
M10970	5B	472662963	0.020577962	0.391752577	99	0.270800424	0.315327251	0.002882562	1.362735746
M6360	3A	480442075	0.020587838	0.432989691	99	0.270800424	0.315320092	0.004309447	-1.844154143
M5027	2B	758922449	0.020708833	0.381443299	99	0.270800424	0.315232682	0.003282671	-1.603967394
M6232	3A	305876520	0.020836308	0.319587629	99	0.270800424	0.315141171	0.005619031	-3.297120248
M1253	1B	380772381	0.020883497	0.340206186	99	0.270800424	0.315107445	0.004754894	2.626904842
M10863	5B	422121027	0.021084627	0.309278351	99	0.270800424	0.314964592	0.003095738	-1.899429445
M4364	2B	540660555	0.021111638	0.463917526	99	0.270800424	0.314945516	0.003559209	-1.457730253
M418	1A	650844956	0.021161528	0.340206186	99	0.270800424	0.314910352	0.00292615	-1.638113092
M13131	6B	47753862	0.021191669	0.350515464	99	0.270800424	0.31488915	0.003237651	1.761694223
M801	1B	37951885	0.021207307	0.329896907	99	0.270800424	0.314878162	0.005591782	3.235191524
M3349	2A	763430259	0.021258426	0.412371134	99	0.270800424	0.314842303	0.005523584	-2.562750377
M4513	2B	299291476	0.02126307	0.340206186	99	0.270800424	0.314839049	0.004363868	2.454696858
M3281	2A	773395688	0.021389176	0.474226804	99	0.270800424	0.314750997	0.007842419	3.183468013
M1576	1B	420600926	0.021480923	0.381443299	99	0.270800424	0.31468728	0.007271139	-3.685257928
M10472	5A	611631186	0.021543946	0.175257732	99	0.270800424	0.314643676	0.001864902	-2.063225511
M7465	3B	206291923	0.021611143	0.195876289	99	0.270800424	0.314597333	0.001574192	-1.563133617
M11784	5B	682399214	0.021630287	0.051546392	99	0.270800424	0.314584158	0.000865286	-3.267879308
M1403	1B	333219089	0.021647152	0.371134021	99	0.270800424	0.314572562	0.002879775	1.511718981
M345	1A	486815863	0.02169122	0.278350515	99	0.270800424	0.314542305	0.005185036	-3.63652199
M3793	2B	96381383	0.021726652	0.164948454	99	0.270800424	0.314518025	0.001711044	-2.028375564
M4571	2B	398349905	0.021797872	0.371134021	99	0.270800424	0.314469347	0.003801647	2.009544571
M8957	4A	661535725	0.021977074	0.175257732	99	0.270800424	0.314347603	0.001564557	-1.765739125
M13475	6B	576042248	0.021978066	0.412371134	99	0.270800424	0.314346933	0.003963704	1.901275003
M9313	4A	730004142	0.022048713	0.18556701	99	0.270800424	0.314299227	0.001639392	1.753103953
M8399	3D	294644099	0.022086803	0.319587629	99	0.270800424	0.314273574	0.002629334	-1.635427048
M15031	7A	714618306	0.022106699	0.402061856	99	0.270800424	0.314260192	0.002689513	1.330905496
M15481	7B	0	0.022254472	0.175257732	99	0.270800424	0.314161199	0.001374543	1.570872757
M13181	6B	93428436	0.022320689	0.453608247	99	0.270800424	0.314117066	0.002787143	1.234321644
M12021	5D	704165878	0.022349917	0.24742268	99	0.270800424	0.31409763	0.002402795	-1.953420143
M4100	2B	419320938	0.022497404	0.474226804	99	0.270800424	0.313999959	0.004892461	2.088892941
M4655	2B	707465009	0.022523645	0.412371134	99	0.270800424	0.313982652	0.005737039	2.820205472
M847	1B	17621853	0.022656992	0.381443299	99	0.270800424	0.313895033	0.003196526	-1.708806982
M10270	5A	434483981	0.02266134	0.164948454	99	0.270800424	0.313892186	0.001582008	-1.956088112
M7831	3B	733356572	0.022681074	0.350515464	99	0.270800424	0.313879268	0.005209646	-3.033941318
M9090	4A	692078422	0.022688416	0.175257732	99	0.270800424	0.313874465	0.001556434	-1.813426982
M10843	5B	0	0.022813908	0.371134021	99	0.270800424	0.313792622	0.005662881	3.132917155
M3898	2B	137802366	0.0229532	0.164948454	99	0.270800424	0.313702335	0.001578365	-1.976718524
M6457	3A	570114845	0.022967377	0.257731959	99	0.270800424	0.313693178	0.001725212	1.383655936
M12573	6A	524836376	0.023025623	0.350515464	99	0.270800424	0.313655619	0.002772125	1.638926443
M11793	5B	656472011	0.023034133	0.041237113	99	0.270800424	0.31365014	0.000693334	-3.485526027
M11744	5B	680852435	0.023034133	0.041237113	99	0.270800424	0.31365014	0.000693334	3.485526027
M11776	5B	684700913	0.023034133	0.041237113	99	0.270800424	0.31365014	0.000693334	3.485526027
M5880	2D	605350061	0.023050216	0.206185567	99	0.270800424	0.313639791	0.001624304	1.634279969
M13155	6B	0	0.023124673	0.350515464	99	0.270800424	0.313591979	0.002832665	-1.681923348
M3605	2B	163007189	0.023206085	0.422680412	99	0.270800424	0.313539887	0.002477641	1.224251514
M825	1B	28701051	0.023381992	0.474226804	99	0.270800424	0.313427987	0.003878565	-1.721111643
M5905	2D	755037267	0.023406833	0.340206186	99	0.270800424	0.313412256	0.002372747	1.469245876
M8480	3D	577418701	0.023466545	0.494845361	99	0.270800424	0.313374516	0.003000749	1.280712882
M3606	2B	163007189	0.023649524	0.463917526	99	0.270800424	0.313259494	0.002917549	-1.338573612
M7001	3B	17974227	0.023787655	0.432989691	99	0.270800424	0.313173285	0.002745248	1.357369724
M4421	2B	619000495	0.02433209	0.391752577	99	0.270800424	0.312838575	0.002995265	-1.674346384
M4808	2B	736110500	0.024372813	0.443298969	99	0.270800424	0.312813858	0.004594188	-2.273318254
M9178	4A	25353003	0.024381248	0.103092784	99	0.270800424	0.312808744	0.001243416	2.646589439
M13872	6D	4373922	0.02454076	0.24742268	99	0.270800424	0.312712381	0.002403235	2.145296175
M5110	2B	746974042	0.024566226	0.391752577	99	0.270800424	0.312697058	0.002446123	1.380534633
M5282	2B	549670301	0.024668663	0.350515464	99	0.270800424	0.312635591	0.004620012	-2.926334794
M7515	3B	74352754	0.024712147	0.309278351	99	0.270800424	0.31260958	0.002725721	1.960130113
M12771	6A	714489935	0.024735059	0.164948454	99	0.270800424	0.312595894	0.001690725	2.281814135
M1746	1B	461485520	0.02474917	0.371134021	99	0.270800424	0.312587472	0.002631432	-1.579299328
M14131	7A	4140180	0.025025986	0.360824742	99	0.270800424	0.312423273	0.002621111	1.636148753
M9427	4A	733792535	0.025069856	0.432989691	99	0.270800424	0.312397426	0.002786709	-1.452139654
M5930	2D	619962487	0.025088872	0.463917526	99	0.270800424	0.312386238	0.003747001	1.823755656
M4495	2B	555576973	0.025176718	0.340206186	99	0.270800424	0.312334669	0.002461545	1.639484022
M4363	2B	540660555	0.025321692	0.309278351	99	0.270800424	0.312249977	0.002459017	1.81195429
M14522	7A	56203202	0.025404303	0.164948454	99	0.270800424	0.312201946	0.001013341	-1.404614904
M15372	7B	426526640	0.025552087	0.298969072	99	0.270800424	0.312116433	0.001833655	-1.410458079
M10731	5B	264879872	0.02557162	0.103092784	99	0.270800424	0.31210517	0.001028215	-2.295390508
M6559	3A	651994615	0.025668076	0.134020619	99	0.270800424	0.312049684	0.001106064	1.906533306
M12254	6A	71319035	0.025709358	0.072164948	99	0.270800424	0.312026004	0.000750691	2.406958703
M8136	3B	303789579	0.025851464	0.24742268	99	0.270800424	0.311944797	0.001565177	-1.471809445
M9763	4D	370674103	0.025934707	0.360824742	99	0.270800424	0.311897446	0.002567363	1.660790464
M9284	4A	726418793	0.025987194	0.484536082	99	0.270800424	0.311867672	0.002370051	-1.14401956
M896	1B	32775858	0.026022865	0.237113402	99	0.270800424	0.311847474	0.001799025	-1.77696487
M2882	2A	605543538	0.026029403	0.226804124	99	0.270800424	0.311843775	0.00133158	1.375381355
M5857	2D	603508254	0.026044506	0.319587629	99	0.270800424	0.311835234	0.002052895	1.505689597
M11998	5D	553338175	0.026221738	0.360824742	99	0.270800424	0.3117354	0.001875541	-1.226688128
M11010	5B	428671152	0.026350665	0.391752577	99	0.270800424	0.311663223	0.002414973	1.46195649
M11075	5B	592867962	0.026392008	0.06185567	99	0.270800424	0.311640157	0.000664541	2.551863097
M6516	3A	481213917	0.026435242	0.371134021	99	0.270800424	0.311616077	0.00225283	-1.444186925
M9138	4A	23511186	0.026589431	0.092783505	99	0.270800424	0.311530537	0.000966369	2.492435022
M1628	1B	144111278	0.026674141	0.494845361	99	0.270800424	0.311483765	0.003919096	-1.901294381
M4469	2B	617949676	0.026783801	0.463917526	99	0.270800424	0.311423451	0.002431972	-1.263666772
M4717	2B	717090293	0.026837092	0.432989691	99	0.270800424	0.311394234	0.004880079	-2.722245461
M1625	1B	614701448	0.026860569	0.391752577	99	0.270800424	0.311381382	0.005322509	3.284447114
M11318	5B	373116658	0.027035426	0.360824742	99	0.270800424	0.311286036	0.002596184	1.750712404
M13529	6B	655890375	0.027198371	0.237113402	99	0.270800424	0.311197771	0.002301104	2.375557195
M8615	4A	125790560	0.027230033	0.432989691	99	0.270800424	0.311180685	0.002214699	-1.253510084
M8956	4A	648906704	0.027237076	0.082474227	99	0.270800424	0.311176887	0.000611567	1.817728528
M4146	2B	184403011	0.027259025	0.164948454	99	0.270800424	0.311165058	0.001614851	2.401801636
M1036	1B	46096564	0.027272391	0.030927835	99	0.270800424	0.31115786	0.000457798	3.633205737
M1309	1B	462799871	0.027322996	0.103092784	99	0.270800424	0.31113064	0.001037557	-2.474881195
M4326	2B	289305639	0.02752587	0.164948454	99	0.270800424	0.311022051	0.00110484	1.659336916
M15312	7B	162779025	0.027637224	0.082474227	99	0.270800424	0.310962808	0.000844896	2.548130924
M9958	5A	74419583	0.027651992	0.164948454	99	0.270800424	0.31095497	0.001084879	1.636823973
M741	1B	9082117	0.027657503	0.082474227	99	0.270800424	0.310952046	0.000654975	-1.9767952
M2080	1D	40222148	0.027699596	0.360824742	99	0.270800424	0.310929735	0.002723271	-1.881527414
M7244	3B	0	0.027756814	0.453608247	99	0.270800424	0.310899464	0.002400218	1.321849335
M1075	1B	326043338	0.027767066	0.360824742	99	0.270800424	0.310894048	0.00208383	1.443239965
M581	1A	0	0.027892357	0.195876289	99	0.270800424	0.310828019	0.001374555	1.761603223
M1321	1B	0	0.027904058	0.134020619	99	0.270800424	0.310821869	0.001114705	2.088806477
M9165	4A	710830242	0.027990565	0.257731959	99	0.270800424	0.310776483	0.001897241	1.854421061
M4636	2B	680082816	0.027993927	0.391752577	99	0.270800424	0.310774723	0.002343065	-1.506880705
M4926	2B	370533021	0.028022416	0.103092784	99	0.270800424	0.31075981	0.000981773	-2.40176811
M6586	3A	662913097	0.028152871	0.391752577	99	0.270800424	0.310691729	0.00239728	1.550500996
M6677	3A	708320731	0.02827778	0.402061856	99	0.270800424	0.310626855	0.004693394	-2.970858325
M8358	3D	48269637	0.028360112	0.350515464	99	0.270800424	0.310584261	0.002245606	1.635222252
M8109	3B	42103334	0.028594669	0.041237113	99	0.270800424	0.310463627	0.00046452	-2.898968201
M6718	3A	714450654	0.028611418	0.371134021	99	0.270800424	0.310455053	0.002361683	-1.638599248
M13521	6B	634042491	0.028853157	0.494845361	99	0.270800424	0.310331894	0.004040432	2.120284662
M9741	4D	16813358	0.028973288	0.257731959	99	0.270800424	0.310271097	0.001315219	1.3306692
M8603	4A	5349394	0.029030575	0.288659794	99	0.270800424	0.310242199	0.002007274	-1.816847961
M10176	5A	472070401	0.029053173	0.494845361	99	0.270800424	0.310230816	0.003788234	-2.001720117
M6439	3A	456437080	0.029057914	0.494845361	99	0.270800424	0.31022843	0.002247761	1.187921107
M9778	4D	450148197	0.029090423	0.072164948	99	0.270800424	0.310212074	0.000591544	-2.146117594
M10917	5B	455741036	0.02910917	0.278350515	99	0.270800424	0.31020265	0.002286332	2.151888088
M12236	6A	261310368	0.02915633	0.340206186	99	0.270800424	0.310178974	0.00724825	-5.590702074
M12211	6A	14386702	0.02915633	0.340206186	99	0.270800424	0.310178974	0.00724825	5.590702074
M12213	6A	13815254	0.02915633	0.340206186	99	0.270800424	0.310178974	0.00724825	5.590702074
M12300	6A	23850958	0.02915633	0.340206186	99	0.270800424	0.310178974	0.00724825	5.590702074
M12325	6A	0	0.02915633	0.340206186	99	0.270800424	0.310178974	0.00724825	5.590702074
M3953	2B	419769571	0.02915633	0.340206186	99	0.270800424	0.310178974	0.00724825	5.590702074
M4957	2B	761846794	0.029185684	0.216494845	99	0.270800424	0.310164258	0.001514912	1.838028502
M9417	4A	740144144	0.029283898	0.18556701	99	0.270800424	0.310115132	0.001499059	-2.129067019
M5788	2D	0	0.029383809	0.144329897	99	0.270800424	0.310065338	0.000793701	-1.45428988
M10684	5B	0	0.029413054	0.350515464	99	0.270800424	0.310050796	0.004681915	3.535892158
M14473	7A	49648308	0.029413054	0.350515464	99	0.270800424	0.310050796	0.004681915	3.535892158
M14529	7A	62883363	0.029413054	0.350515464	99	0.270800424	0.310050796	0.004681915	3.535892158
M2535	2A	45084253	0.029413054	0.350515464	99	0.270800424	0.310050796	0.004681915	3.535892158
M9105	4A	694752853	0.029417313	0.319587629	99	0.270800424	0.31004868	0.003203503	2.653876295
M13336	6B	0	0.029597603	0.402061856	99	0.270800424	0.309959385	0.00316815	2.098997472
M13285	6B	217195685	0.029597603	0.402061856	99	0.270800424	0.309959385	0.00316815	-2.098997472
M6094	3A	13812131	0.029662152	0.422680412	99	0.270800424	0.309927555	0.002590478	-1.636111585
M8061	3B	785499330	0.029779532	0.144329897	99	0.270800424	0.309869862	0.000865825	-1.607808188
M4701	2B	425264799	0.029806789	0.391752577	99	0.270800424	0.309856499	0.0029937	2.050001401
M8092	3B	808502629	0.029992772	0.319587629	99	0.270800424	0.309765666	0.001699195	1.435199995
M15192	7B	89311430	0.030011484	0.103092784	99	0.270800424	0.309756561	0.000690343	-1.80870142
M1020	1B	170576130	0.030109015	0.268041237	99	0.270800424	0.309709197	0.001572831	-1.590081549
M7346	3B	73851126	0.030207696	0.113402062	99	0.270800424	0.30966144	0.000778934	1.867410877
M15314	7B	333414790	0.030276101	0.103092784	99	0.270800424	0.309628433	0.000739574	-1.954771782
M8053	3B	589410123	0.030323265	0.082474227	99	0.270800424	0.309605721	0.000634721	2.100309883
M14121	6D	471828189	0.030406177	0.484536082	99	0.270800424	0.309565886	0.002391799	-1.350836884
M1284	1B	392145668	0.030441058	0.257731959	99	0.270800424	0.309549161	0.001580992	1.680597007
M4975	2B	675190488	0.030471806	0.319587629	99	0.270800424	0.309534435	0.003656246	3.137517049
M4692	2B	717237714	0.030717344	0.340206186	99	0.270800424	0.309417405	0.001892757	1.538079562
M7048	3B	419044180	0.030720775	0.298969072	99	0.270800424	0.309415777	0.001396574	1.291553351
M4856	2B	746141190	0.030819419	0.175257732	99	0.270800424	0.309369045	0.001149631	-1.819483571
M3115	2A	747610057	0.030917525	0.422680412	99	0.270800424	0.309322726	0.002964523	-1.951595749
M12488	6A	358607782	0.03092654	0.072164948	99	0.270800424	0.309318477	0.000633473	2.443294987
M1812	1B	653681729	0.030950351	0.206185567	99	0.270800424	0.309307262	0.001330191	1.797065639
M6418	3A	512556910	0.030966657	0.12371134	99	0.270800424	0.309299587	0.000953905	2.148979987
M3199	2A	63622947	0.031124569	0.402061856	99	0.270800424	0.309225483	0.001721499	1.19938818
M11941	5D	490937616	0.031252079	0.484536082	99	0.270800424	0.309165936	0.002897075	1.681725408
M5437	2D	607996993	0.031401155	0.453608247	99	0.270800424	0.309096644	0.002579444	-1.60706452
M6683	3A	294935009	0.031509664	0.381443299	99	0.270800424	0.309046428	0.00252043	1.873832895
M10368	5A	689204261	0.03157992	0.422680412	99	0.270800424	0.309014012	0.002725988	1.833012162
M5032	2B	562205678	0.03161292	0.268041237	99	0.270800424	0.308998812	0.001347626	-1.430457598
M1613	1B	594764202	0.031648219	0.484536082	99	0.270800424	0.308982573	0.003201853	1.882205416
M11980	5D	68534792	0.03174094	0.340206186	99	0.270800424	0.308940007	0.002051583	1.722697975
M13437	6B	617644199	0.031778181	0.329896907	99	0.270800424	0.308922948	0.001696621	-1.470883278
M9973	5A	65359644	0.031833905	0.453608247	99	0.270800424	0.308897461	0.00313056	1.977304077
M14252	7A	0	0.031935736	0.319587629	99	0.270800424	0.30885101	0.002038916	1.833702272
M2543	2A	43291957	0.031939726	0.340206186	99	0.270800424	0.308849193	0.002453679	-2.073238693
M484	1A	540712899	0.032034544	0.494845361	99	0.270800424	0.308806087	0.00345692	2.014099132
M10741	5B	356684358	0.032041038	0.144329897	99	0.270800424	0.308803139	0.000827436	1.653206871
M13349	6B	248510675	0.032222714	0.288659794	99	0.270800424	0.308720942	0.001765743	1.773968632
M7242	3B	43051220	0.03229779	0.237113402	99	0.270800424	0.308687118	0.001363275	-1.671254307
M7982	3B	763454895	0.032380064	0.020618557	99	0.270800424	0.308650147	0.000247608	3.49966987
M6432	3A	509564298	0.032380064	0.020618557	99	0.270800424	0.308650147	0.000247608	-3.49966987
M3413	2B	6525683	0.032383525	0.453608247	99	0.270800424	0.308648594	0.002736163	-1.758035742
M701	1B	3572450	0.032627978	0.371134021	99	0.270800424	0.308539345	0.002071312	-1.638880641
M15111	7A	718204695	0.032636525	0.257731959	99	0.270800424	0.308535541	0.001341488	1.528850435
M9437	4B	2213400	0.032640892	0.381443299	99	0.270800424	0.308533598	0.001722723	-1.326753096
M4737	2B	682744936	0.032709394	0.216494845	99	0.270800424	0.308503152	0.00100479	1.366289583
M15153	7A	739414265	0.032762276	0.412371134	99	0.270800424	0.308479695	0.003847056	-2.750786047
M759	1B	13027114	0.032784398	0.381443299	99	0.270800424	0.308469895	0.002180155	-1.686425158
M8846	4A	618529609	0.032795033	0.443298969	99	0.270800424	0.308465186	0.002290877	-1.525301183
M5922	2D	695112271	0.032815587	0.432989691	99	0.270800424	0.308456089	0.003149614	-2.148337354
M5322	2B	0	0.03293438	0.381443299	99	0.270800424	0.308403633	0.005438372	4.226013841
M13742	6B	0	0.032955586	0.309278351	99	0.270800424	0.30839429	0.001440849	1.381785021
M4958	2B	761846794	0.033060608	0.195876289	99	0.270800424	0.308348113	0.001197817	-1.819541088
M5359	2D	2727249	0.033075161	0.381443299	99	0.270800424	0.308341727	0.004446672	-3.470160894
M7108	3B	23684392	0.033166224	0.226804124	99	0.270800424	0.308301833	0.001241882	-1.634436283
M6448	3A	523316233	0.033166974	0.24742268	99	0.270800424	0.308301505	0.001174233	1.416652165
M7279	3B	0	0.033169919	0.319587629	99	0.270800424	0.308300217	0.00353606	3.303060857
M13936	6D	14987960	0.033215234	0.422680412	99	0.270800424	0.30828041	0.003128602	-2.212677222
M10189	5A	503430449	0.033341537	0.226804124	99	0.270800424	0.308225356	0.001284314	-1.69921576
M2612	2A	0	0.033387397	0.360824742	99	0.270800424	0.308205422	0.001606427	-1.337795742
M11740	5B	676094493	0.033463478	0.371134021	99	0.270800424	0.308172415	0.004276477	3.470315599
M2087	1D	92257056	0.033527661	0.381443299	99	0.270800424	0.308144631	0.002243717	-1.774940793
M3040	2A	719468993	0.033590187	0.319587629	99	0.270800424	0.308117619	0.001712484	1.619912257
M12735	6A	594854466	0.033607021	0.195876289	99	0.270800424	0.308110356	0.001099958	1.698504321
M6387	3A	396435371	0.033647352	0.268041237	99	0.270800424	0.30809297	0.001577519	-1.782241264
M4629	2B	427616803	0.033679305	0.453608247	99	0.270800424	0.308079212	0.002766431	-1.848606524
M11627	5B	596950005	0.03376909	0.463917526	99	0.270800424	0.308040626	0.002513803	1.646843303
M14665	7A	112180967	0.033785262	0.154639175	99	0.270800424	0.308033687	0.000826625	1.625394229
M2172	1D	433030711	0.033785726	0.494845361	99	0.270800424	0.308033488	0.004674554	-2.872410291
M12629	6A	570488216	0.03378962	0.237113402	99	0.270800424	0.308031818	0.001139705	1.461713244
M5113	2B	622858890	0.033912796	0.278350515	99	0.270800424	0.307979093	0.001411716	-1.547965992
M10509	5A	680512404	0.033950138	0.051546392	99	0.270800424	0.30796315	0.000378811	2.245475043
M10621	5B	4826033	0.034099006	0.278350515	99	0.270800424	0.307899773	0.001158382	1.277155984
M12403	6A	28011074	0.034102469	0.340206186	99	0.270800424	0.307898302	0.001246382	-1.124442599
M14971	7A	621160098	0.034223129	0.072164948	99	0.270800424	0.307847156	0.000487739	-2.081727084
M1868	1B	478156609	0.034362022	0.329896907	99	0.270800424	0.307788518	0.001609684	-1.508980701
M2472	2A	19484111	0.034447807	0.319587629	99	0.270800424	0.307752427	0.001792784	1.739170208
M10847	5B	420193748	0.034469575	0.288659794	99	0.270800424	0.307743284	0.001773869	1.906399014
M7160	3B	27998611	0.034515614	0.268041237	99	0.270800424	0.307723967	0.001504779	-1.74393073
M7754	3B	420365956	0.034600164	0.484536082	99	0.270800424	0.307688563	0.002463279	-1.583099455
M10393	5A	579325248	0.034635717	0.371134021	99	0.270800424	0.307673703	0.00400899	3.367214934
M4691	2B	717237714	0.034658965	0.484536082	99	0.270800424	0.307663996	0.002729725	1.757320234
M11902	5D	175947785	0.034725727	0.278350515	99	0.270800424	0.307636155	0.001619488	-1.818358662
M13169	6B	85384559	0.034782438	0.340206186	99	0.270800424	0.307612551	0.001404707	-1.292546646
M6026	3A	7314381	0.034825004	0.237113402	99	0.270800424	0.307594861	0.001308146	1.729154397
M13312	6B	0	0.034923829	0.24742268	99	0.270800424	0.30755388	0.001602492	-2.035732494
M5914	2D	606124230	0.034949485	0.134020619	99	0.270800424	0.307543261	0.000919122	2.157172243
M15393	7B	500789093	0.035012605	0.041237113	99	0.270800424	0.307517171	0.000493988	-3.774806572
M5997	2D	636099167	0.035115145	0.134020619	99	0.270800424	0.307474893	0.000797679	-1.881021643
M1720	1B	629678307	0.035193273	0.474226804	99	0.270800424	0.307442769	0.002295385	1.533104013
M4954	2B	762073843	0.035213348	0.319587629	99	0.270800424	0.307434527	0.001597709	1.584373229
M6405	3A	541482839	0.035213575	0.257731959	99	0.270800424	0.307434434	0.00140817	-1.731567858
M6350	3A	141003106	0.035305888	0.494845361	99	0.270800424	0.307396598	0.00203154	-1.304504031
M4435	2B	620850327	0.035320492	0.24742268	99	0.270800424	0.307390622	0.001119531	-1.438353814
M10806	5B	389819412	0.035353	0.103092784	99	0.270800424	0.307377329	0.000595925	-1.839214645
M13891	6D	6745747	0.035403451	0.494845361	99	0.270800424	0.307356725	0.002764446	-1.780027359
M105	1A	16914186	0.035519001	0.298969072	99	0.270800424	0.307309652	0.001151169	-1.23088128
M2311	1D	490589208	0.035575465	0.422680412	99	0.270800424	0.307286709	0.002644398	-2.003123872
M1045	1B	94011977	0.035586647	0.329896907	99	0.270800424	0.30728217	0.001786636	-1.734551939
M12823	6A	605225151	0.035714236	0.432989691	99	0.270800424	0.307230485	0.00350967	2.605389451
M60	1A	150793813	0.035974155	0.288659794	99	0.270800424	0.307125803	0.001434533	-1.609004398
M15155	7A	729332254	0.036002129	0.340206186	99	0.270800424	0.307114585	0.003203216	3.050806809
M3933	2B	657506318	0.036004332	0.360824742	99	0.270800424	0.307113702	0.001635851	-1.469077259
M1791	1B	608599570	0.036138304	0.164948454	99	0.270800424	0.307060107	0.000936011	1.845623035
M6699	3A	505333325	0.036168801	0.381443299	99	0.270800424	0.307047936	0.001872986	1.598383899
M725	1B	3164636	0.036189646	0.195876289	99	0.270800424	0.307039624	0.0010943	-1.819622978
M10127	5A	461008994	0.036323745	0.020618557	99	0.270800424	0.30698627	0.000259497	4.114407473
M3600	2B	298962243	0.036323745	0.020618557	99	0.270800424	0.30698627	0.000259497	4.114407473
M3760	2B	434731139	0.036323745	0.020618557	99	0.270800424	0.30698627	0.000259497	4.114407473
M9099	4A	220162554	0.036323745	0.020618557	99	0.270800424	0.30698627	0.000259497	4.114407473
M9125	4A	236257343	0.036323745	0.020618557	99	0.270800424	0.30698627	0.000259497	4.114407473
M9130	4A	702149172	0.036323745	0.020618557	99	0.270800424	0.30698627	0.000259497	4.114407473
M9066	4A	590854832	0.036323745	0.020618557	99	0.270800424	0.30698627	0.000259497	-4.114407473
M9079	4A	692084397	0.036323745	0.020618557	99	0.270800424	0.30698627	0.000259497	-4.114407473
M9086	4A	690887990	0.036323745	0.020618557	99	0.270800424	0.30698627	0.000259497	-4.114407473
M9132	4A	236257089	0.036323745	0.020618557	99	0.270800424	0.30698627	0.000259497	-4.114407473
M10478	5A	613546871	0.036327155	0.453608247	99	0.270800424	0.306984916	0.001872284	-1.349474453
M6660	3A	699467553	0.036337796	0.391752577	99	0.270800424	0.306980691	0.003847281	3.211760456
M3384	2A	585501135	0.036504103	0.268041237	99	0.270800424	0.306914841	0.00095041	-1.164912982
M829	1B	441543004	0.036558474	0.412371134	99	0.270800424	0.306893382	0.002742391	2.188123113
M12477	6A	226020901	0.036697534	0.412371134	99	0.270800424	0.306838652	0.003085102	2.470931377
M4017	2B	535286874	0.036769073	0.030927835	99	0.270800424	0.306810583	0.000303946	-3.252164024
M4885	2B	337709850	0.036779681	0.432989691	99	0.270800424	0.306806426	0.001754214	-1.341082834
M3023	2A	705995008	0.036780684	0.278350515	99	0.270800424	0.306806033	0.001277846	-1.519668454
M13097	6B	26841451	0.037052669	0.298969072	99	0.270800424	0.306699879	0.001712289	-1.90990996
M13680	6B	705935137	0.037138827	0.463917526	99	0.270800424	0.306666426	0.001709547	1.231716836
M13995	6D	156753575	0.037163948	0.257731959	99	0.270800424	0.306656687	0.00163262	-2.118757822
M5740	2D	607144225	0.037328885	0.257731959	99	0.270800424	0.306592922	0.001179259	-1.537193017
M8063	3B	748377632	0.037337754	0.432989691	99	0.270800424	0.306589501	0.002721456	-2.112099967
M979	1B	6341226	0.037338051	0.257731959	99	0.270800424	0.306589387	0.001777084	-2.317042088
M6362	3A	357806111	0.037376627	0.340206186	99	0.270800424	0.30657452	0.001870776	1.849789087
M2710	2A	563950254	0.037685197	0.371134021	99	0.270800424	0.306456189	0.001878091	1.716323474
M3805	2B	575904883	0.037692228	0.381443299	99	0.270800424	0.306453505	0.003127578	-2.781457488
M10608	5B	369428012	0.037897155	0.432989691	99	0.270800424	0.306375504	0.002042892	1.609225481
M11815	5B	0	0.037911147	0.443298969	99	0.270800424	0.306370195	0.002950043	2.270602351
M11997	5D	553338175	0.037921494	0.484536082	99	0.270800424	0.30636627	0.002586658	-1.821968211
M8911	4A	32202337	0.038088988	0.340206186	99	0.270800424	0.306302894	0.002248795	-2.26594647
M6474	3A	595935042	0.038155516	0.422680412	99	0.270800424	0.306277804	0.0023211	-1.885738827
M8496	3D	596995100	0.038301272	0.257731959	99	0.270800424	0.306222996	0.001136593	1.520171159
M11548	5B	332444025	0.038301295	0.041237113	99	0.270800424	0.306222988	0.000324817	-2.715225971
M479	1A	541984000	0.038331046	0.484536082	99	0.270800424	0.306211828	0.003059336	2.178182239
M5340	2B	22348080	0.038360073	0.113402062	99	0.270800424	0.306200949	0.00057271	1.743554351
M1412	1B	0	0.038485665	0.340206186	99	0.270800424	0.306153979	0.001533021	-1.560800908
M4234	2B	388778942	0.038547706	0.329896907	99	0.270800424	0.306130836	0.001378193	-1.449348866
M4676	2B	595508003	0.038551656	0.484536082	99	0.270800424	0.306129364	0.001816269	-1.300587607
M3262	2A	770104270	0.038560337	0.226804124	99	0.270800424	0.306126129	0.000816721	-1.249701177
M2771	2A	432372670	0.038624736	0.463917526	99	0.270800424	0.306102158	0.003464343	2.595901379
M10631	5B	685117897	0.03863904	0.041237113	99	0.270800424	0.306096839	0.000337037	2.842223183
M7294	3B	50790384	0.038726479	0.443298969	99	0.270800424	0.306064372	0.002524614	-1.984946587
M11113	5B	531194944	0.038769681	0.381443299	99	0.270800424	0.30604836	0.00284075	2.598590362
M6638	3A	695160174	0.038854237	0.06185567	99	0.270800424	0.306017075	0.000567362	3.207461207
M9159	4A	708532867	0.038864783	0.381443299	99	0.270800424	0.306013178	0.004341926	-3.981540914
M10491	5A	662956259	0.039019458	0.164948454	99	0.270800424	0.305956154	0.000966516	-2.0577108
M9787	4D	465587647	0.039083198	0.340206186	99	0.270800424	0.305932725	0.001560574	-1.613521306
M3388	2A	588436341	0.039139093	0.412371134	99	0.270800424	0.305912214	0.001572367	1.343132878
M2904	2A	502932671	0.039195872	0.402061856	99	0.270800424	0.30589141	0.001564312	-1.372503572
M7693	3B	684619731	0.039466253	0.288659794	99	0.270800424	0.305792781	0.001559244	-1.918651724
M8475	3D	568041760	0.039502718	0.371134021	99	0.270800424	0.305779534	0.002781663	-2.664668839
M6277	3A	41376359	0.039646527	0.381443299	99	0.270800424	0.305727421	0.001331116	-1.245183735
M9232	4A	26495448	0.039711331	0.422680412	99	0.270800424	0.305704003	0.001354319	1.145159233
M717	1B	5001690	0.039743716	0.103092784	99	0.270800424	0.305692315	0.000489371	-1.697933483
M14547	7A	69893167	0.039839358	0.432989691	99	0.270800424	0.305657858	0.001509647	1.250122476
M5393	2D	15857433	0.039855069	0.371134021	99	0.270800424	0.305652207	0.002202747	-2.128923287
M1139	1B	57477371	0.040090959	0.030927835	99	0.270800424	0.305567634	0.000252053	-2.940567956
M13167	6B	89695899	0.040099386	0.463917526	99	0.270800424	0.305564623	0.001716864	-1.335596606
M713	1B	104669566	0.040151302	0.463917526	99	0.270800424	0.305546085	0.002289816	1.783618588
M2718	2A	44973108	0.040197665	0.443298969	99	0.270800424	0.305529552	0.002131889	-1.73984755
M690	1A	592499382	0.040220238	0.206185567	99	0.270800424	0.30552151	0.000986536	-1.731975814
M1326	1B	16677697	0.04022104	0.422680412	99	0.270800424	0.305521224	0.002449906	2.098133598
M5278	2B	0	0.040259626	0.113402062	99	0.270800424	0.305507488	0.000618789	1.977124869
M7736	3B	688163825	0.040361596	0.381443299	99	0.270800424	0.305471257	0.003160218	-3.009524484
M10132	5A	143838637	0.040374522	0.381443299	99	0.270800424	0.305466671	0.002440444	2.324816748
M6892	3B	7791132	0.040398422	0.18556701	99	0.270800424	0.305458196	0.000671689	1.316056165
M1314	1B	348861564	0.040405769	0.391752577	99	0.270800424	0.305455592	0.001837256	-1.705468345
M6705	3A	711688019	0.040407326	0.319587629	99	0.270800424	0.30545504	0.001466371	-1.668616544
M6364	3A	531631181	0.0404365	0.371134021	99	0.270800424	0.305444704	0.001742036	-1.708214551
M9974	5A	65359644	0.040533148	0.164948454	99	0.270800424	0.305410522	0.000666585	1.474213585
M11729	5B	669502971	0.040571454	0.216494845	99	0.270800424	0.305396998	0.000883863	-1.490735605
M4773	2B	732350878	0.040609801	0.432989691	99	0.270800424	0.305383473	0.002373209	2.003234366
M9054	4A	660462703	0.04061499	0.103092784	99	0.270800424	0.305381644	0.000519785	-1.842995061
M11118	5B	587102217	0.040669937	0.144329897	99	0.270800424	0.305362291	0.000737542	-1.870450935
M3627	2B	419250140	0.040779399	0.402061856	99	0.270800424	0.305323819	0.00289138	2.639342094
M216	1A	288094235	0.04093049	0.030927835	99	0.270800424	0.305270898	0.000260978	3.108448245
M706	1B	3572450	0.040974658	0.474226804	99	0.270800424	0.305255468	0.001622768	1.261909774
M5708	2D	589246120	0.041081148	0.288659794	99	0.270800424	0.305218337	0.001658945	2.124862111
M11016	5B	485806429	0.041122862	0.134020619	99	0.270800424	0.30520382	0.000585214	1.616103406
M5365	2D	12550757	0.041412291	0.350515464	99	0.270800424	0.305103528	0.002043721	-2.173132286
M12052	6A	0	0.04143989	0.134020619	99	0.270800424	0.305094003	0.00067633	1.88212221
M13570	6B	572539293	0.041482752	0.432989691	99	0.270800424	0.305079225	0.001348966	1.163143938
M1475	1B	544133182	0.041498027	0.432989691	99	0.270800424	0.305073963	0.001522547	-1.313297113
M13240	6B	0	0.041506373	0.082474227	99	0.270800424	0.305071088	0.000520571	2.357866211
M13721	6B	462318879	0.041570917	0.484536082	99	0.270800424	0.305048879	0.001750216	1.35144259
M59	1A	150793813	0.041612111	0.278350515	99	0.270800424	0.305034723	0.000969166	1.303971797
M15483	7B	0	0.041671673	0.041237113	99	0.270800424	0.305014283	0.000309944	2.818891882
M5127	2B	221893152	0.041769148	0.402061856	99	0.270800424	0.304980898	0.002037924	1.90543102
M4695	2B	712830783	0.041782162	0.278350515	99	0.270800424	0.304976447	0.001072856	1.449381526
M3703	2B	66559474	0.041793809	0.319587629	99	0.270800424	0.304972465	0.001624793	-1.912328101
M10442	5A	275637188	0.041802956	0.195876289	99	0.270800424	0.304969338	0.000846304	-1.625525965
M9413	4A	743748313	0.041836238	0.360824742	99	0.270800424	0.304957968	0.001665199	1.737660807
M5957	2D	16633732	0.041937409	0.463917526	99	0.270800424	0.304923465	0.002757955	2.24383299
M15010	7A	736526737	0.042020659	0.082474227	99	0.270800424	0.30489514	0.000488552	2.240258588
M12011	5D	552080511	0.042096007	0.484536082	99	0.270800424	0.304869555	0.002153503	-1.683847787
M9883	5A	199146737	0.042240768	0.298969072	99	0.270800424	0.304820539	0.001254948	1.595782966
M7987	3B	604660614	0.042418004	0.360824742	99	0.270800424	0.30476077	0.00119405	1.263335733
M9874	5A	27509864	0.042474783	0.422680412	99	0.270800424	0.304741679	0.001414096	-1.278911599
M4007	2B	184494452	0.042512134	0.381443299	99	0.270800424	0.304729135	0.00303608	-3.045360461
M11648	5B	609144429	0.042548538	0.257731959	99	0.270800424	0.304716921	0.001086167	1.61382173
M403	1A	508571576	0.042628875	0.237113402	99	0.270800424	0.304690006	0.000996871	1.612980806
M13541	6B	657260591	0.042837607	0.340206186	99	0.270800424	0.304620328	0.001144385	-1.296873307
M3794	2B	96381383	0.042964621	0.484536082	99	0.270800424	0.304578106	0.002444287	-1.950651155
M11114	5B	531194944	0.042990636	0.257731959	99	0.270800424	0.304569475	0.000920409	-1.381749021
M11080	5B	505694656	0.042998883	0.340206186	99	0.270800424	0.304566739	0.001154171	1.312888208
M8960	4A	648906704	0.043004797	0.309278351	99	0.270800424	0.304564778	0.001249542	-1.563726786
M4496	2B	555576973	0.043005521	0.195876289	99	0.270800424	0.304564538	0.000689739	-1.362917493
M8064	3B	748377632	0.043007087	0.103092784	99	0.270800424	0.304564019	0.000539801	-2.026692844
M12413	6A	48048270	0.043011534	0.072164948	99	0.270800424	0.304562545	0.000359074	1.926125223
M4001	2B	213709998	0.043300631	0.195876289	99	0.270800424	0.304467051	0.000796834	1.585340768
M4112	2B	477570133	0.043399611	0.206185567	99	0.270800424	0.304434513	0.00073547	1.39326974
M13343	6B	355137498	0.043443148	0.340206186	99	0.270800424	0.304420226	0.001130474	1.299218419
M4997	2B	0	0.043567	0.298969072	99	0.270800424	0.304379667	0.001359402	-1.782878727
M5800	2D	732568622	0.04358123	0.412371134	99	0.270800424	0.304375015	0.001574758	1.497847667
M14956	7A	710959153	0.043798347	0.154639175	99	0.270800424	0.304304235	0.000762122	-1.94269787
M9754	4D	80836783	0.043865088	0.402061856	99	0.270800424	0.304282553	0.003239038	-3.180421475
M10496	5A	669910915	0.043876974	0.494845361	99	0.270800424	0.304278696	0.002613133	-2.085312758
M6519	3A	633055334	0.043889005	0.134020619	99	0.270800424	0.304274792	0.00054784	1.614655885
M5105	2B	772149581	0.04408175	0.113402062	99	0.270800424	0.30421241	0.000585353	-2.047851219
M4772	2B	731476082	0.044229431	0.402061856	99	0.270800424	0.304164809	0.001896485	-1.877631763
M6378	3A	45033405	0.044315088	0.402061856	99	0.270800424	0.304137279	0.001853434	1.838561997
M480	1A	541984000	0.044363441	0.154639175	99	0.270800424	0.304121763	0.000765741	1.977107977
M8930	4A	653314229	0.044390615	0.412371134	99	0.270800424	0.304113051	0.00158999	-1.540422547
M7039	3B	17613543	0.044512917	0.206185567	99	0.270800424	0.304073913	0.000836307	1.624936023
M13546	6B	479212545	0.044514703	0.144329897	99	0.270800424	0.304073342	0.000566768	1.573240974
M13861	6D	1585297	0.044610586	0.412371134	99	0.270800424	0.30404274	0.001394376	-1.357601001
M12785	6A	461501843	0.04462158	0.020618557	99	0.270800424	0.304039236	0.000140967	-2.745659713
M11378	5B	99660656	0.04468138	0.020618557	99	0.270800424	0.30402019	0.00022244	-4.33833572
M12713	6A	583292509	0.044686379	0.494845361	99	0.270800424	0.3040186	0.002046047	-1.662891376
M10777	5B	398715853	0.044727627	0.402061856	99	0.270800424	0.30400548	0.001473228	-1.475011653
M11426	5B	421136464	0.044734604	0.103092784	99	0.270800424	0.304003263	0.000490345	-1.914960793
M817	1B	21249692	0.044818207	0.298969072	99	0.270800424	0.303976716	0.001120975	1.512399946
M10587	5B	576692587	0.044822983	0.484536082	99	0.270800424	0.303975201	0.00209787	-1.746609043
M12416	6A	60075194	0.044848625	0.432989691	99	0.270800424	0.303967071	0.002079801	-1.938812916
M11146	5B	502377352	0.044887808	0.020618557	99	0.270800424	0.303954656	0.000189853	3.719893467
M13172	6B	85384559	0.04495798	0.453608247	99	0.270800424	0.303932453	0.001427364	1.273219277
M320	1A	471700683	0.044976795	0.24742268	99	0.270800424	0.303926505	0.000806652	-1.319707527
M9870	5A	19590103	0.045049952	0.298969072	99	0.270800424	0.303903407	0.001103011	1.495857745
M34	1A	3982825	0.045221958	0.082474227	99	0.270800424	0.303849256	0.000350754	1.730915261
M10160	5A	446652509	0.045232991	0.494845361	99	0.270800424	0.30384579	0.002323526	-1.911507161
M6801	3A	729897788	0.045249851	0.12371134	99	0.270800424	0.303840496	0.000517743	-1.704370507
M5697	2D	612367311	0.04530177	0.175257732	99	0.270800424	0.303824205	0.000561791	-1.306939971
M10707	5B	119188411	0.04544202	0.030927835	99	0.270800424	0.303780297	0.000214669	2.838707947
M2345	2A	15529824	0.045456428	0.18556701	99	0.270800424	0.303775795	0.001195786	2.636273139
M10969	5B	472662963	0.045506644	0.484536082	99	0.270800424	0.303760115	0.002295245	1.940082941
M6898	3B	2259539	0.045512013	0.134020619	99	0.270800424	0.303758439	0.000557116	-1.702718464
M1987	1D	598855942	0.045631313	0.432989691	99	0.270800424	0.303721266	0.001434713	-1.360795792
M13278	6B	515290485	0.045699257	0.154639175	99	0.270800424	0.303700142	0.000612114	1.628038714
M6127	3A	19895266	0.045726558	0.288659794	99	0.270800424	0.303691663	0.00076534	-1.091136607
M834	1B	21523277	0.04575901	0.237113402	99	0.270800424	0.303681592	0.000764066	-1.327070014
M4262	2B	553279131	0.046043426	0.226804124	99	0.270800424	0.303593652	0.000674525	-1.232416622
M3765	2B	91631796	0.046105256	0.350515464	99	0.270800424	0.303574612	0.003253404	3.851445807
M9109	4A	142667251	0.046105256	0.350515464	99	0.270800424	0.303574612	0.003253404	3.851445807
M9095	4A	640249155	0.046105256	0.350515464	99	0.270800424	0.303574612	0.003253404	-3.851445807
M8801	4A	603746204	0.046131267	0.216494845	99	0.270800424	0.30356661	0.000701876	1.346018375
M8912	4A	32202337	0.046187456	0.051546392	99	0.270800424	0.303549341	0.000232143	1.872075697
M6700	3A	505333325	0.046214079	0.402061856	99	0.270800424	0.303541166	0.00136752	1.414678335
M6741	3A	716528015	0.046258365	0.402061856	99	0.270800424	0.303527579	0.00163829	-1.696409942
M506	1A	546799796	0.046292759	0.381443299	99	0.270800424	0.303517037	0.001138874	1.243944775
M15398	7B	522729143	0.04630178	0.432989691	99	0.270800424	0.303514274	0.001477795	-1.422253345
M1714	1B	629664285	0.046367384	0.12371134	99	0.270800424	0.303494193	0.0004902	-1.653556324
M9116	4A	700739397	0.046441117	0.092783505	99	0.270800424	0.30347166	0.000433872	-1.954500824
M7246	3B	0	0.046613395	0.432989691	99	0.270800424	0.303419161	0.001670835	-1.618860149
M727	1B	3164636	0.046701866	0.494845361	99	0.270800424	0.303392282	0.002208339	1.87574189
M11317	5B	373116658	0.046733222	0.226804124	99	0.270800424	0.303382768	0.000752421	-1.395333652
M11720	5B	658559745	0.046885555	0.309278351	99	0.270800424	0.303336647	0.001170911	-1.597555825
M9384	4A	739304166	0.046987882	0.319587629	99	0.270800424	0.303305757	0.000899385	-1.190101518
M2803	2A	109064436	0.047005294	0.24742268	99	0.270800424	0.303300508	0.000724563	1.23887057
M6342	3A	108025232	0.047041045	0.494845361	99	0.270800424	0.303289736	0.001646044	1.408287513
M14801	7A	577687730	0.047088134	0.391752577	99	0.270800424	0.303275562	0.001148076	-1.241974884
M3696	2B	69066012	0.047114024	0.103092784	99	0.270800424	0.303267776	0.000524792	2.15849778
M5300	2B	789875741	0.047116916	0.020618557	99	0.270800424	0.303266907	0.000168388	3.463155763
M4110	2B	384320443	0.047140978	0.082474227	99	0.270800424	0.303259674	0.000455642	2.343941494
M9122	4A	701045149	0.047243545	0.082474227	99	0.270800424	0.303228891	0.000401644	-2.070656097
M8812	4A	0	0.047349015	0.030927835	99	0.270800424	0.303197311	0.000217156	-2.992100224
M8958	4A	661535725	0.047349015	0.030927835	99	0.270800424	0.303197311	0.000217156	-2.992100224
M4599	2B	550996028	0.047355103	0.226804124	99	0.270800424	0.303195491	0.000766175	1.439747137
M5457	2D	577330597	0.04744169	0.06185567	99	0.270800424	0.303169625	0.000331961	2.291449668
M6697	3A	711287701	0.04746663	0.412371134	99	0.270800424	0.303162184	0.001233517	-1.277873499
M8071	3B	748377576	0.047524688	0.422680412	99	0.270800424	0.303144879	0.002017854	-2.041923543
M11180	5B	0	0.047649794	0.340206186	99	0.270800424	0.303107665	0.002364868	-2.981042489
M685	1A	370054619	0.047729724	0.494845361	99	0.270800424	0.303083945	0.002069606	1.796592419
M2768	2A	125458503	0.047739786	0.237113402	99	0.270800424	0.303080962	0.000832769	1.509007
M7877	3B	586524432	0.047743238	0.350515464	99	0.270800424	0.303079938	0.003331176	-4.08361468
M1619	1B	603262258	0.04780773	0.494845361	99	0.270800424	0.303060836	0.001953934	1.698951741
M13597	6B	675620421	0.047912247	0.298969072	99	0.270800424	0.303029937	0.001346322	-1.94183266
M7407	3B	73443935	0.047958087	0.278350515	99	0.270800424	0.303016408	0.00078727	-1.220776109
M4742	2B	730086784	0.048027364	0.195876289	99	0.270800424	0.302995988	0.000590934	-1.304032168
M15186	7B	33652142	0.048059136	0.154639175	99	0.270800424	0.302986634	0.000633287	-1.771331243
M8922	4A	651777951	0.048110635	0.195876289	99	0.270800424	0.302971486	0.000670124	1.481347152
M2211	1D	475877262	0.048141975	0.402061856	99	0.270800424	0.302962275	0.001425068	1.535709752
M449	1A	532773229	0.048156772	0.360824742	99	0.270800424	0.302957929	0.001172229	1.40804369
M2706	2A	417084357	0.048189666	0.463917526	99	0.270800424	0.302948272	0.00267899	2.50453274
M11795	5B	625779199	0.048192877	0.051546392	99	0.270800424	0.30294733	0.000307089	2.583996103
M3339	2A	766578300	0.04819928	0.319587629	99	0.270800424	0.302945451	0.00153112	2.078271225
M13345	6B	486549528	0.048233197	0.278350515	99	0.270800424	0.302935504	0.000898392	1.401077795
M7305	3B	537220619	0.0482531	0.371134021	99	0.270800424	0.30292967	0.001178494	-1.379000555
M8855	4A	483683726	0.048282316	0.329896907	99	0.270800424	0.302921111	0.000962057	-1.26722329
M6207	3A	603025700	0.048334683	0.24742268	99	0.270800424	0.302905784	0.000943048	1.658042863
M4933	2B	746932893	0.04837051	0.422680412	99	0.270800424	0.302895308	0.001171117	1.206177409
M4264	2B	328673302	0.048456924	0.319587629	99	0.270800424	0.302870075	0.000802201	1.094690671
M8624	4A	114487333	0.048514434	0.350515464	99	0.270800424	0.302853309	0.000957448	1.192673291
M7476	3B	304279362	0.048668347	0.051546392	99	0.270800424	0.302808542	0.000234055	-1.988878755
M9071	4A	689130935	0.048719492	0.030927835	99	0.270800424	0.302793699	0.000194051	-2.751139903
M2911	2A	676994096	0.048830211	0.298969072	99	0.270800424	0.302761626	0.002870118	4.218951898
M6158	3A	575259106	0.048865732	0.381443299	99	0.270800424	0.302751353	0.002165902	2.497213425
M6209	3A	577683980	0.048865732	0.381443299	99	0.270800424	0.302751353	0.002165902	-2.497213425
M7416	3B	275636381	0.048865732	0.381443299	99	0.270800424	0.302751353	0.002165902	-2.497213425
M7881	3B	740106785	0.048865732	0.381443299	99	0.270800424	0.302751353	0.002165902	-2.497213425
M10278	5A	551446643	0.048870874	0.412371134	99	0.270800424	0.302749866	0.002126716	2.268369716
M3987	2B	159210768	0.049013952	0.329896907	99	0.270800424	0.302708572	0.001550255	-2.072942137
M475	1A	540664662	0.049045726	0.474226804	99	0.270800424	0.302699419	0.001825872	1.699526338
M3989	2B	126899677	0.049097625	0.350515464	99	0.270800424	0.302684482	0.002115877	-2.667387648
M2905	2A	21223660	0.049121318	0.350515464	99	0.270800424	0.302677669	0.003057928	-3.856848255
M6762	3A	0	0.049122256	0.298969072	99	0.270800424	0.302677399	0.000662571	0.979776919
M13191	6B	77434370	0.049136876	0.103092784	99	0.270800424	0.302673197	0.000426162	-1.828084154
M9162	4A	708083352	0.04914505	0.113402062	99	0.270800424	0.302670848	0.000529017	-2.063338866
M14476	7A	49592914	0.04920925	0.309278351	99	0.270800424	0.302652414	0.000927969	1.328841631
M3080	2A	736066326	0.049245152	0.350515464	99	0.270800424	0.302642117	0.001011857	1.279434207
M1335	1B	366877298	0.04928011	0.175257732	99	0.270800424	0.302632098	0.000569873	1.442166212
M3717	2B	77176639	0.049363044	0.402061856	99	0.270800424	0.302608359	0.002124227	2.347213049
M9987	5A	333414537	0.049487508	0.24742268	99	0.270800424	0.302572814	0.000641763	-1.155243482
M13565	6B	438806491	0.049513391	0.432989691	99	0.270800424	0.302565434	0.001176937	1.211269825
M2317	1D	487954965	0.049560661	0.24742268	99	0.270800424	0.302551967	0.000816693	-1.472308104
M849	1B	207966086	0.049579341	0.422680412	99	0.270800424	0.302546649	0.001598556	-1.687559197
M7927	3B	402859187	0.049611729	0.092783505	99	0.270800424	0.302537433	0.000386462	1.859784511
M15028	7A	711324238	0.049636489	0.412371134	99	0.270800424	0.302530393	0.001232864	1.335582231
M12463	6A	171029382	0.049697353	0.391752577	99	0.270800424	0.302513102	0.002222105	2.537046309
M12465	6A	113174438	0.049697353	0.391752577	99	0.270800424	0.302513102	0.002222105	2.537046309
M13234	6B	151063947	0.04978419	0.484536082	99	0.270800424	0.302488471	0.00188226	1.740553972
M500	1A	540414573	0.04980059	0.381443299	99	0.270800424	0.302483825	0.00149731	1.759376144
M4613	2B	91473909	0.049900559	0.164948454	99	0.270800424	0.302455537	0.000569187	-1.549724428
M478	1A	540665432	0.049911325	0.319587629	99	0.270800424	0.302452494	0.000877525	-1.233420935
M2509	2A	51108076	0.049916173	0.474226804	99	0.270800424	0.302451124	0.001513344	-1.433624263
M5207	2B	776263331	0.049938571	0.319587629	99	0.270800424	0.302444796	0.000874777	1.230229393
M13305	6B	346802293	0.050083158	0.453608247	99	0.270800424	0.302404024	0.002000584	-1.987971036
M4927	2B	619961495	0.050140105	0.402061856	99	0.270800424	0.302388	0.001048619	1.176935802
M9646	4B	660656439	0.050160587	0.164948454	99	0.270800424	0.302382241	0.000574556	-1.572496191
M7344	3B	70108166	0.05033118	0.082474227	99	0.270800424	0.302334377	0.000412514	-2.265685052
M636	1A	578785363	0.050349597	0.24742268	99	0.270800424	0.30232922	0.000748774	-1.371355412
M8729	4A	532076077	0.050384139	0.391752577	99	0.270800424	0.302319554	0.001077304	1.246989081
M6723	3A	715199344	0.050398795	0.422680412	99	0.270800424	0.302315454	0.001520078	1.631234737
M11867	5B	552916735	0.050403975	0.092783505	99	0.270800424	0.302314006	0.000351768	1.719856955
M9156	4A	353560638	0.050600852	0.051546392	99	0.270800424	0.302259069	0.000416037	-3.675645834
M4964	2B	753796374	0.050624064	0.237113402	99	0.270800424	0.302252607	0.000876373	1.683961638
M8462	3D	150762205	0.050662801	0.144329897	99	0.270800424	0.30224183	0.000517764	1.635715134
M9055	4A	687327397	0.050688238	0.391752577	99	0.270800424	0.302234758	0.003022734	-3.519960116
M10867	5B	14901284	0.050728792	0.319587629	99	0.270800424	0.302223491	0.001024653	1.463807788
M5644	2D	587305772	0.050836678	0.237113402	99	0.270800424	0.302193565	0.000711047	1.372024079
M1329	1B	505061911	0.050839513	0.298969072	99	0.270800424	0.30219278	0.00092349	-1.413350898
M12225	6A	17652529	0.050854348	0.340206186	99	0.270800424	0.30218867	0.001328873	-1.787770908
M12306	6A	0	0.050879112	0.12371134	99	0.270800424	0.302181813	0.00034377	1.272449903
M14130	7A	2682255	0.050887862	0.082474227	99	0.270800424	0.302179391	0.000335358	1.862290193
M7865	3B	736466529	0.050914404	0.092783505	99	0.270800424	0.302172047	0.000408976	-2.019806704
M6783	3A	726107371	0.050939449	0.072164948	99	0.270800424	0.302165121	0.000317083	2.014387657
M9	1A	0	0.050972833	0.257731959	99	0.270800424	0.302155895	0.000815676	1.45188056
M14321	7A	41580720	0.050984029	0.402061856	99	0.270800424	0.302152802	0.001380256	-1.575228
M4561	2B	306065006	0.051118454	0.06185567	99	0.270800424	0.302115726	0.000342306	2.54598369
M12182	6A	7997688	0.051169444	0.402061856	99	0.270800424	0.302101689	0.001155762	1.323819114
M3997	2B	0	0.051306177	0.319587629	99	0.270800424	0.302064123	0.001743679	-2.519350763
M1231	1B	86102631	0.051389322	0.288659794	99	0.270800424	0.302041333	0.000753127	-1.206694793
M6090	3A	8191493	0.05141693	0.494845361	99	0.270800424	0.302033775	0.001773686	-1.658654251
M310	1A	362317345	0.051426886	0.195876289	99	0.270800424	0.30203105	0.000687765	1.625140577
M10257	5A	545129801	0.051485429	0.484536082	99	0.270800424	0.30201504	0.002126719	-2.033811744
M8491	3D	115087655	0.051493076	0.237113402	99	0.270800424	0.30201295	0.000737094	1.440648205
M4569	2B	664208834	0.051522633	0.278350515	99	0.270800424	0.302004875	0.000774361	-1.290007245
M12006	5D	552916927	0.051678194	0.298969072	99	0.270800424	0.30196246	0.000912634	1.419776776
M6714	3A	669396058	0.051688166	0.371134021	99	0.270800424	0.301959746	0.001405707	-1.761966465
M13	1A	0	0.051697631	0.432989691	99	0.270800424	0.30195717	0.000946803	1.017408559
M1556	1B	564574859	0.051698787	0.164948454	99	0.270800424	0.301956855	0.000631173	-1.780420999
M12050	6A	5124270	0.051704177	0.041237113	99	0.270800424	0.301955389	0.000239238	2.699662624
M6073	3A	13376403	0.051711377	0.412371134	99	0.270800424	0.30195343	0.001691404	1.908920055
M83	1A	14718514	0.051786416	0.391752577	99	0.270800424	0.301933033	0.001224964	1.457370115
M1431	1B	554018133	0.051872471	0.350515464	99	0.270800424	0.301909681	0.003183966	4.240730524
M8582	4A	45140360	0.051872471	0.350515464	99	0.270800424	0.301909681	0.003183966	4.240730524
M14154	7A	2862136	0.051936353	0.371134021	99	0.270800424	0.301892373	0.001274824	1.605585459
M13344	6B	355137498	0.051945788	0.443298969	99	0.270800424	0.301889819	0.001308712	1.38019414
M8319	3D	37969650	0.051954998	0.18556701	99	0.270800424	0.301887326	0.000571011	-1.438844132
M3676	2B	6409896	0.051984788	0.484536082	99	0.270800424	0.301879265	0.001307622	1.262626734
M9935	5A	79280510	0.052081858	0.113402062	99	0.270800424	0.301853035	0.000420617	1.738581442
M9782	4D	446124259	0.052155411	0.12371134	99	0.270800424	0.301833195	0.000432249	1.640086599
M14380	7A	0	0.052158678	0.494845361	99	0.270800424	0.301832315	0.001804192	1.711521541
M4982	2B	760132062	0.052313994	0.020618557	99	0.270800424	0.301790521	0.000154457	3.52704041
M8712	4A	584046320	0.052313994	0.020618557	99	0.270800424	0.301790521	0.000154457	3.52704041
M8630	4A	111053755	0.052313994	0.020618557	99	0.270800424	0.301790521	0.000154457	-3.52704041
M8694	4A	340554154	0.052313994	0.020618557	99	0.270800424	0.301790521	0.000154457	-3.52704041
M8698	4A	326976519	0.052313994	0.020618557	99	0.270800424	0.301790521	0.000154457	-3.52704041
M4880	2B	751248841	0.052361971	0.474226804	99	0.270800424	0.301777638	0.001877246	1.865493255
M12780	6A	610294735	0.05242968	0.18556701	99	0.270800424	0.301759478	0.000559989	-1.42396144
M6696	3A	711289967	0.052544296	0.319587629	99	0.270800424	0.301728795	0.00101516	1.50214733
M13093	6B	24469547	0.052590764	0.484536082	99	0.270800424	0.301716376	0.001410215	-1.377562603
M11112	5B	531194944	0.05259771	0.103092784	99	0.270800424	0.301714521	0.000391187	-1.796243724
M3348	2A	643435780	0.052599464	0.412371134	99	0.270800424	0.301714052	0.002277827	-2.614907756
M3146	2A	755740514	0.052651229	0.391752577	99	0.270800424	0.301700234	0.002120595	-2.565056504
M5053	2B	0	0.052815829	0.443298969	99	0.270800424	0.301656392	0.001235435	1.324737848
M7810	3B	544414886	0.052871137	0.051546392	99	0.270800424	0.301641694	0.000305245	-2.817803986
M14778	7A	597566121	0.052903194	0.051546392	99	0.270800424	0.301633182	0.000266841	-2.464786313
M7415	3B	275636381	0.052903194	0.051546392	99	0.270800424	0.301633182	0.000266841	-2.464786313
M7898	3B	745290131	0.052903194	0.051546392	99	0.270800424	0.301633182	0.000266841	-2.464786313
M2235	1D	583819101	0.052989436	0.216494845	99	0.270800424	0.30161031	0.000565187	1.245020722
M3177	2A	758417987	0.053000462	0.402061856	99	0.270800424	0.301607389	0.001230849	1.460272553
M8204	3B	317056611	0.053086555	0.340206186	99	0.270800424	0.301584602	0.001013759	1.423702977
M2064	1D	41581295	0.053102518	0.164948454	99	0.270800424	0.301580381	0.000524294	1.519093384
M4956	2B	762916610	0.053105135	0.164948454	99	0.270800424	0.30157969	0.000601613	-1.743203514
M5809	2D	580117384	0.053131237	0.092783505	99	0.270800424	0.301572791	0.000365035	-1.881291126
M976	1B	94373668	0.053214273	0.298969072	99	0.270800424	0.301550871	0.001202704	-1.926650743
M14099	6D	463549451	0.053253794	0.402061856	99	0.270800424	0.301540451	0.001390096	1.657085797
M13340	6B	239326408	0.053346409	0.412371134	99	0.270800424	0.301516065	0.001626599	-1.893825987
M14393	7A	29138301	0.053475538	0.371134021	99	0.270800424	0.301482141	0.001849835	2.398832155
M6674	3A	707348902	0.053519854	0.350515464	99	0.270800424	0.301470519	0.001154477	1.586482762
M3847	2B	78508701	0.053561856	0.422680412	99	0.270800424	0.301459513	0.001056737	-1.205182784
M11987	5D	548345507	0.053666721	0.24742268	99	0.270800424	0.301432076	0.000778623	1.519971891
M1332	1B	505061911	0.053722071	0.360824742	99	0.270800424	0.301417617	0.000966158	1.294634224
M10753	5B	388587448	0.053770082	0.474226804	99	0.270800424	0.301405088	0.00170005	-1.734837693
M8434	3D	517001628	0.053795708	0.237113402	99	0.270800424	0.301398406	0.000638372	-1.303491266
M8766	4A	597058372	0.05396155	0.041237113	99	0.270800424	0.301355244	0.000226167	2.663587906
M8781	4A	595433064	0.05396155	0.041237113	99	0.270800424	0.301355244	0.000226167	2.663587906
M6533	3A	643546998	0.054004765	0.422680412	99	0.270800424	0.301344021	0.001366619	1.57148437
M11993	5D	548685020	0.054067069	0.463917526	99	0.270800424	0.301327856	0.001128103	1.183268233
M13410	6B	512060987	0.054092018	0.226804124	99	0.270800424	0.301321389	0.000763879	-1.639643901
M12059	6A	7901769	0.054109085	0.453608247	99	0.270800424	0.301316967	0.001394156	1.49672863
M8955	4A	648906704	0.054147532	0.360824742	99	0.270800424	0.30130701	0.002142594	2.893774441
M8770	4A	597058372	0.054147532	0.360824742	99	0.270800424	0.30130701	0.002142594	-2.893774441
M12056	6A	1338546	0.054192974	0.18556701	99	0.270800424	0.301295252	0.000563622	1.481401162
M5275	2B	792988297	0.054229648	0.216494845	99	0.270800424	0.301285771	0.000770194	-1.736327559
M9999	5A	390232148	0.054245403	0.309278351	99	0.270800424	0.301281699	0.000706358	1.115015165
M14804	7A	634800683	0.054302615	0.06185567	99	0.270800424	0.301266926	0.000283301	2.238368745
M7974	3B	113713782	0.0544166	0.154639175	99	0.270800424	0.301237543	0.000513952	-1.627709707
M11697	5B	626337103	0.05450857	0.020618557	99	0.270800424	0.301213884	0.000167765	3.991627952
M781	1B	344369943	0.054530966	0.319587629	99	0.270800424	0.301208129	0.001084582	-1.665551589
M5795	2D	744685545	0.054645348	0.350515464	99	0.270800424	0.301178777	0.002854875	-4.005673652
M2989	2A	715223908	0.054693134	0.350515464	99	0.270800424	0.301166534	0.000888619	-1.247910637
M13328	6B	439380404	0.054746819	0.371134021	99	0.270800424	0.301152794	0.001694221	-2.249264862
M6754	3A	464718567	0.054774717	0.391752577	99	0.270800424	0.301145659	0.001754229	-2.207481234
M8052	3B	589410123	0.055072817	0.041237113	99	0.270800424	0.301069666	0.000231841	2.78664176
M9478	4B	104937784	0.055244173	0.051546392	99	0.270800424	0.301026184	0.000253776	2.447831115
M2950	2A	549728944	0.055332244	0.463917526	99	0.270800424	0.301003892	0.001052176	1.129453159
M2314	1D	489968994	0.055379095	0.474226804	99	0.270800424	0.300992049	0.001449903	-1.523846003
M11607	5B	587341324	0.055393604	0.06185567	99	0.270800424	0.300988384	0.000306644	2.471483194
M12441	6A	67377724	0.055393604	0.06185567	99	0.270800424	0.300988384	0.000306644	2.471483194
M5849	2D	580188957	0.055470385	0.216494845	99	0.270800424	0.300969004	0.000707124	-1.630615867
M10834	5B	417804694	0.055504763	0.082474227	99	0.270800424	0.300960337	0.000278675	-1.687920973
M6456	3A	569891580	0.05555364	0.195876289	99	0.270800424	0.300948023	0.00068909	-1.758931269
M3700	2B	568415591	0.055556838	0.391752577	99	0.270800424	0.300947218	0.002397952	3.060615082
M3725	2B	72918645	0.055556838	0.391752577	99	0.270800424	0.300947218	0.002397952	3.060615082
M1312	1B	328983636	0.055567958	0.082474227	99	0.270800424	0.300944418	0.000418575	-2.538177938
M1820	1B	346227510	0.055574527	0.309278351	99	0.270800424	0.300942765	0.000824227	1.332954942
M5967	2D	644662016	0.055579019	0.226804124	99	0.270800424	0.300941634	0.000839214	1.850866726
M3657	2B	58723204	0.055766526	0.443298969	99	0.270800424	0.300894528	0.001519823	1.720728212
M5251	2B	790887920	0.055781293	0.340206186	99	0.270800424	0.300890825	0.001252054	-1.847617469
M6842	3A	732410813	0.05592546	0.12371134	99	0.270800424	0.300854734	0.00034841	-1.417534855
M4371	2B	714502961	0.055957468	0.402061856	99	0.270800424	0.300846734	0.001177887	-1.47540549
M14192	7A	13842196	0.055981114	0.360824742	99	0.270800424	0.300840827	0.002548907	-3.559112404
M3081	2A	735932521	0.055996927	0.453608247	99	0.270800424	0.300836879	0.001479098	-1.643322137
M13268	6B	472958277	0.056048576	0.371134021	99	0.270800424	0.300823991	0.001016468	-1.381561236
M4681	2B	706398142	0.056051071	0.484536082	99	0.270800424	0.300823369	0.000999345	-1.040436615
M14452	7A	609726833	0.056051215	0.360824742	99	0.270800424	0.300823333	0.001182301	1.652948852
M12122	6A	0	0.056079329	0.020618557	99	0.270800424	0.300816323	0.000173918	-4.257275557
M4960	2B	761846794	0.056108634	0.391752577	99	0.270800424	0.300809021	0.001027624	-1.324629979
M13028	6B	21092440	0.056137096	0.072164948	99	0.270800424	0.300801932	0.00035623	2.493998094
M4552	2B	565077064	0.056177171	0.309278351	99	0.270800424	0.300791958	0.001291194	-2.110787282
M9382	4A	732725652	0.056186145	0.381443299	99	0.270800424	0.300789726	0.001863039	-2.469810221
M6622	3A	547633295	0.056254974	0.164948454	99	0.270800424	0.300772616	0.000474534	-1.456540236
M5821	2D	606705458	0.056303335	0.144329897	99	0.270800424	0.300760608	0.000472079	1.657428533
M11772	5B	685508081	0.056333571	0.113402062	99	0.270800424	0.300753106	0.000308935	-1.381198011
M15451	7B	583551258	0.056421977	0.051546392	99	0.270800424	0.300731196	0.000338364	-3.333317265
M4024	2B	33540168	0.056579426	0.340206186	99	0.270800424	0.300692266	0.001073592	-1.606934453
M12446	6A	74106762	0.056600597	0.072164948	99	0.270800424	0.30068704	0.000260587	-1.839458099
M12292	6A	17317261	0.056658191	0.237113402	99	0.270800424	0.300672835	0.00056059	-1.205576306
M10372	5A	572020800	0.056715368	0.257731959	99	0.270800424	0.300658748	0.000767188	1.519415664
M9212	4A	9824444	0.056735127	0.103092784	99	0.270800424	0.300653883	0.00034057	-1.686833727
M8564	4A	59371930	0.05676275	0.216494845	99	0.270800424	0.300647085	0.000620635	1.464518592
M4686	2B	704429363	0.056802977	0.494845361	99	0.270800424	0.300637193	0.001424092	1.471235187
M8347	3D	41035027	0.056813802	0.381443299	99	0.270800424	0.300634532	0.000873638	-1.171110007
M136	1A	20866783	0.056836269	0.443298969	99	0.270800424	0.300629011	0.00116382	1.342941866
M12694	6A	611545509	0.056880497	0.494845361	99	0.270800424	0.30061815	0.001705106	-1.763956184
M9383	4A	739304166	0.057059092	0.288659794	99	0.270800424	0.300574384	0.000719186	1.279447027
M700	1A	590240846	0.057065126	0.051546392	99	0.270800424	0.300572908	0.000220022	-2.192204115
M4291	2B	143000173	0.057066734	0.443298969	99	0.270800424	0.300572515	0.001475705	-1.709732878
M4770	2B	733890211	0.057092942	0.134020619	99	0.270800424	0.300566106	0.000448517	1.719618955
M2764	2A	489635273	0.05710959	0.371134021	99	0.270800424	0.300562036	0.001012103	-1.401669329
M5500	2D	74936166	0.057240591	0.360824742	99	0.270800424	0.300530058	0.000932231	1.330986792
M6363	3A	531631181	0.057262487	0.340206186	99	0.270800424	0.300524721	0.001054247	-1.597029952
M14202	7A	556299936	0.057278175	0.268041237	99	0.270800424	0.300520899	0.000645722	-1.241869093
M808	1B	0	0.057352915	0.298969072	99	0.270800424	0.300502702	0.000951633	1.643014075
M1799	1B	746101578	0.057383599	0.329896907	99	0.270800424	0.300495239	0.001535224	-2.403387232
M4078	2B	296004626	0.057410337	0.041237113	99	0.270800424	0.30048874	0.000242987	3.04458387
M15048	7A	714340795	0.057568745	0.422680412	99	0.270800424	0.3004503	0.000961852	1.179030978
M270	1A	479742741	0.057634842	0.164948454	99	0.270800424	0.300434295	0.00044189	-1.389611317
M12576	6A	524836376	0.057742923	0.082474227	99	0.270800424	0.300408165	0.000293366	1.848559823
M10054	5A	0	0.05780602	0.288659794	99	0.270800424	0.300392936	0.001044786	1.883026574
M3848	2B	78508701	0.057841387	0.288659794	99	0.270800424	0.300384407	0.00065789	1.186447207
M10884	5B	520209151	0.057896789	0.309278351	99	0.270800424	0.300371058	0.000844247	-1.422383963
M1618	1B	628627682	0.058024187	0.474226804	99	0.270800424	0.300340415	0.001240542	1.366082208
M3680	2B	38442340	0.058084609	0.082474227	99	0.270800424	0.300325907	0.000381214	2.41632159
M9806	4D	250840711	0.0581469	0.402061856	99	0.270800424	0.300310967	0.001142601	-1.48720548
M5701	2D	591603469	0.058178962	0.041237113	99	0.270800424	0.300303284	0.000185807	-2.359296013
M2907	2A	21223660	0.058300608	0.371134021	99	0.270800424	0.300274176	0.001020588	-1.442896625
M11970	5D	703088649	0.058386532	0.422680412	99	0.270800424	0.300253655	0.001321209	-1.642534467
M15005	7A	83638613	0.058416605	0.453608247	99	0.270800424	0.300246481	0.001920716	-2.226183313
M10849	5B	664263082	0.058425054	0.24742268	99	0.270800424	0.300244466	0.000617601	1.312532906
M12412	6A	39493610	0.058474313	0.237113402	99	0.270800424	0.300232725	0.000621208	1.378759563
M3009	2A	710104568	0.058634669	0.144329897	99	0.270800424	0.300194576	0.000360128	1.316732773
M11844	5B	621241019	0.058675499	0.443298969	99	0.270800424	0.300184881	0.001133455	1.350227611
M14378	7A	701571182	0.058793136	0.24742268	99	0.270800424	0.300156988	0.00061721	-1.319964853
M9314	4A	730004142	0.05882229	0.474226804	99	0.270800424	0.300150085	0.0013455	1.502042382
M11957	5D	48030503	0.058895022	0.432989691	99	0.270800424	0.300132879	0.001368958	-1.675844805
M7716	3B	295938838	0.059026376	0.051546392	99	0.270800424	0.300101863	0.000261561	2.695650669
M72	1A	10132748	0.059085568	0.154639175	99	0.270800424	0.300087911	0.000542514	1.865585541
M3636	2B	504867107	0.059188293	0.412371134	99	0.270800424	0.300063733	0.001184439	1.530039679
M9297	4A	718920407	0.059202189	0.268041237	99	0.270800424	0.300060466	0.000733508	1.458087799
M10649	5B	8959204	0.059231803	0.164948454	99	0.270800424	0.300053506	0.000579478	-1.872777295
M7931	3B	750783796	0.0592347	0.113402062	99	0.270800424	0.300052826	0.000319306	1.501081684
M12821	6A	602136077	0.059306442	0.484536082	99	0.270800424	0.300035982	0.001686736	1.85808458
M11671	5B	617684309	0.059406387	0.309278351	99	0.270800424	0.300012552	0.001260651	2.179319252
M1009	1B	39514123	0.059463064	0.020618557	99	0.270800424	0.299999285	0.000146304	3.797406901
M1224	1B	0	0.059463064	0.020618557	99	0.270800424	0.299999285	0.000146304	3.797406901
M9748	4D	65113876	0.05952685	0.309278351	99	0.270800424	0.29998437	0.001030389	1.784871318
M12523	6A	69225171	0.059538374	0.350515464	99	0.270800424	0.299981677	0.000781804	1.195172025
M645	1A	584104138	0.059645419	0.340206186	99	0.270800424	0.29995669	0.0006255	-0.986971758
M5887	2D	606913605	0.059689809	0.350515464	99	0.270800424	0.299946343	0.00250646	3.841460529
M4764	2B	739389137	0.059736453	0.309278351	99	0.270800424	0.299935479	0.000772998	1.343726699
M6676	3A	707911761	0.059852399	0.463917526	99	0.270800424	0.299908514	0.001056243	-1.226442221
M163	1A	0	0.060025979	0.484536082	99	0.270800424	0.299868251	0.000959578	-1.069882252
M10747	5B	228277789	0.060035597	0.175257732	99	0.270800424	0.299866024	0.000366738	-1.130654591
M5775	2D	590146863	0.060117626	0.494845361	99	0.270800424	0.299847044	0.001304383	-1.426198587
M8695	4A	0	0.060232027	0.350515464	99	0.270800424	0.29982062	0.002207305	3.413698681
M8711	4A	584046320	0.060232027	0.350515464	99	0.270800424	0.29982062	0.002207305	3.413698681
M1091	1B	601178826	0.060232027	0.350515464	99	0.270800424	0.29982062	0.002207305	-3.413698681
M13803	6B	0	0.060232027	0.350515464	99	0.270800424	0.29982062	0.002207305	-3.413698681
M8659	4A	321099074	0.060232027	0.350515464	99	0.270800424	0.29982062	0.002207305	-3.413698681
M8685	4A	269059397	0.060232027	0.350515464	99	0.270800424	0.29982062	0.002207305	-3.413698681
M8697	4A	326976519	0.060232027	0.350515464	99	0.270800424	0.29982062	0.002207305	-3.413698681
M8813	4A	605005072	0.060232027	0.350515464	99	0.270800424	0.29982062	0.002207305	-3.413698681
M14331	7A	22088450	0.060447884	0.350515464	99	0.270800424	0.299770911	0.00074411	1.154924016
M469	1A	410991937	0.060464629	0.484536082	99	0.270800424	0.299767062	0.001363493	-1.531337084
M7247	3B	658078022	0.060649755	0.278350515	99	0.270800424	0.299724595	0.00072997	1.431476664
M3831	2B	143000939	0.060715322	0.18556701	99	0.270800424	0.299709588	0.000461639	-1.359384879
M6702	3A	712285937	0.06073906	0.319587629	99	0.270800424	0.299704159	0.000909967	-1.556489442
M6137	3A	286518666	0.060773938	0.072164948	99	0.270800424	0.299696187	0.000191538	-1.45173831
M5230	2B	645000730	0.060979096	0.340206186	99	0.270800424	0.299649391	0.001054156	-1.700537743
M12113	6A	0	0.061075287	0.474226804	99	0.270800424	0.29962751	0.001015889	-1.177520262
M14418	7A	33369174	0.061311421	0.350515464	99	0.270800424	0.299573951	0.000850068	1.338229238
M4678	2B	595508003	0.061335339	0.288659794	99	0.270800424	0.299568538	0.000790233	1.511200071
M13070	6B	17658870	0.061343194	0.154639175	99	0.270800424	0.299566762	0.000434791	-1.552278349
M4826	2B	749922381	0.061446939	0.268041237	99	0.270800424	0.299543314	0.000728101	-1.502216728
M14496	7A	55362389	0.061523612	0.175257732	99	0.270800424	0.299526013	0.000392771	1.240926919
M4168	2B	162156739	0.061807733	0.371134021	99	0.270800424	0.299462105	0.000892427	-1.337602403
M2360	2A	15637364	0.06184121	0.340206186	99	0.270800424	0.299454596	0.000728759	-1.192235656
M6712	3A	715352220	0.061893087	0.484536082	99	0.270800424	0.299442968	0.000937058	1.07727144
M6786	3A	595019227	0.061947876	0.113402062	99	0.270800424	0.299430699	0.000347245	1.70719809
M14694	7A	255900956	0.062112406	0.474226804	99	0.270800424	0.299393926	0.001398199	1.648176164
M5546	2D	403470553	0.062193043	0.24742268	99	0.270800424	0.299375942	0.000577992	1.307574076
M6066	3A	143077788	0.062250357	0.154639175	99	0.270800424	0.299363175	0.000395567	1.43312711
M4938	2B	618875828	0.062369343	0.082474227	99	0.270800424	0.299336711	0.000207417	-1.411691926
M1978	1D	4243757	0.062389577	0.381443299	99	0.270800424	0.299332216	0.001071096	1.576714187
M12002	5D	554401631	0.062504782	0.164948454	99	0.270800424	0.299306654	0.000461959	-1.575473311
M7069	3B	15205844	0.062549258	0.134020619	99	0.270800424	0.299296799	0.000299999	1.260122084
M8776	4A	584388334	0.062555531	0.432989691	99	0.270800424	0.299295409	0.000860067	-1.118312197
M9997	5A	69102517	0.062560934	0.371134021	99	0.270800424	0.299294213	0.001109972	1.683940738
M382	1A	504702998	0.062738935	0.06185567	99	0.270800424	0.299254855	0.000194002	-1.770952563
M4934	2B	746932893	0.062740573	0.412371134	99	0.270800424	0.299254494	0.000849777	-1.163610588
M1010	1B	39514123	0.062826868	0.340206186	99	0.270800424	0.299235458	0.003402549	-5.655227951
M1011	1B	270737840	0.062826868	0.340206186	99	0.270800424	0.299235458	0.003402549	-5.655227951
M10355	5A	567120913	0.062826868	0.340206186	99	0.270800424	0.299235458	0.003402549	-5.655227951
M11377	5B	99660656	0.062826868	0.340206186	99	0.270800424	0.299235458	0.003402549	-5.655227951
M1195	1B	111836824	0.062826868	0.340206186	99	0.270800424	0.299235458	0.003402549	-5.655227951
M4597	2B	0	0.062826868	0.340206186	99	0.270800424	0.299235458	0.003402549	-5.655227951
M1293	1B	420864193	0.062826868	0.340206186	99	0.270800424	0.299235458	0.003402549	5.655227951
M13708	6B	709011092	0.062826868	0.340206186	99	0.270800424	0.299235458	0.003402549	5.655227951
M2151	1D	417084354	0.062826868	0.340206186	99	0.270800424	0.299235458	0.003402549	5.655227951
M5913	2D	606124230	0.062826868	0.340206186	99	0.270800424	0.299235458	0.003402549	5.655227951
M6871	3A	741359064	0.062826868	0.340206186	99	0.270800424	0.299235458	0.003402549	5.655227951
M13137	6B	77458408	0.062897014	0.298969072	99	0.270800424	0.299220005	0.000863031	-1.634077899
M8031	3B	776544907	0.062929904	0.371134021	99	0.270800424	0.299212765	0.001684046	-2.569938555
M12683	6A	435773401	0.062938971	0.484536082	99	0.270800424	0.29921077	0.00121717	-1.422941688
M3764	2B	91596926	0.062956674	0.329896907	99	0.270800424	0.299206876	0.001962086	-3.36995406
M9136	4A	432988616	0.062985554	0.092783505	99	0.270800424	0.299200526	0.000416647	2.545543969
M9141	4A	708078692	0.062985554	0.092783505	99	0.270800424	0.299200526	0.000416647	2.545543969
M10730	5B	392637226	0.063066186	0.432989691	99	0.270800424	0.299182813	0.001395778	1.829691149
M1126	1B	125069079	0.063095271	0.113402062	99	0.270800424	0.29917643	0.000327487	1.639881054
M7453	3B	429463062	0.063237184	0.402061856	99	0.270800424	0.29914533	0.001143313	1.618405938
M1071	1B	21849576	0.063247549	0.350515464	99	0.270800424	0.299143061	0.001111797	1.805529928
M1378	1B	471174490	0.063461027	0.360824742	99	0.270800424	0.299096429	0.000738841	1.169510836
M5265	2B	31477695	0.063463635	0.175257732	99	0.270800424	0.29909586	0.000422805	1.37793898
M13601	6B	79255016	0.063563038	0.309278351	99	0.270800424	0.299074205	0.001102129	2.038590639
M11908	5D	254497566	0.063570789	0.175257732	99	0.270800424	0.299072518	0.000947108	-3.091879214
M29	1A	150794362	0.063585607	0.381443299	99	0.270800424	0.299069293	0.001293058	-1.939944175
M824	1B	16427758	0.063612904	0.329896907	99	0.270800424	0.299063356	0.000802568	-1.392807951
M7173	3B	41138847	0.063680769	0.432989691	99	0.270800424	0.299048605	0.000868307	1.149334228
M3316	2A	767324605	0.063722178	0.319587629	99	0.270800424	0.299039613	0.000598771	-1.074493476
M3288	2A	642478723	0.063728784	0.113402062	99	0.270800424	0.299038179	0.00043425	-2.196325128
M3221	2A	0	0.063737993	0.463917526	99	0.270800424	0.29903618	0.001553132	1.920473716
M13105	6B	42378167	0.063806242	0.288659794	99	0.270800424	0.299021378	0.00059445	-1.182591029
M5988	2D	786225684	0.063835867	0.164948454	99	0.270800424	0.299014958	0.000357317	-1.24454942
M4073	2B	236592763	0.064111735	0.24742268	99	0.270800424	0.298955329	0.00076984	1.795316228
M7705	3B	683106209	0.064166085	0.041237113	99	0.270800424	0.298943614	0.000214093	-2.998217501
M4648	2B	697714139	0.064201582	0.12371134	99	0.270800424	0.298935969	0.000331787	-1.549667916
M14013	6D	339389407	0.064290644	0.113402062	99	0.270800424	0.298916806	0.000393552	-2.00803783
M13192	6B	77434370	0.064346416	0.278350515	99	0.270800424	0.298904822	0.000629887	1.310501099
M14501	7A	62750954	0.064348721	0.216494845	99	0.270800424	0.298904326	0.000480249	-1.284700156
M4760	2B	0	0.064488893	0.134020619	99	0.270800424	0.298874255	0.000413713	-1.791659113
M9187	4A	50555579	0.064547039	0.195876289	99	0.270800424	0.298861802	0.000474215	-1.406412427
M9447	4B	4892979	0.064605107	0.494845361	99	0.270800424	0.298849378	0.001682917	1.977436039
M1539	1B	571445284	0.06466479	0.484536082	99	0.270800424	0.298836621	0.001411582	-1.695471342
M5900	2D	608266290	0.064670144	0.12371134	99	0.270800424	0.298835477	0.000384785	-1.810320293
M12689	6A	573692004	0.064749602	0.494845361	99	0.270800424	0.298818514	0.001576983	1.857107537
M10335	5A	565398435	0.064773996	0.453608247	99	0.270800424	0.298813311	0.001266495	-1.627668295
M12362	6A	29496320	0.064877337	0.329896907	99	0.270800424	0.298791292	0.001051663	-1.861375134
M10434	5A	490330792	0.064934941	0.164948454	99	0.270800424	0.298779035	0.000452015	-1.601496578
M5435	2D	33564182	0.065000309	0.113402062	99	0.270800424	0.29876514	0.000279935	1.444090925
M15190	7B	89311430	0.065038956	0.072164948	99	0.270800424	0.298756932	0.000284009	-2.303682538
M10563	5B	11085155	0.065058063	0.463917526	99	0.270800424	0.298752876	0.001242561	1.56826868
M13393	6B	612219213	0.065159763	0.422680412	99	0.270800424	0.29873131	0.001320197	-1.831675509
M10190	5A	503430449	0.065291051	0.237113402	99	0.270800424	0.298703522	0.000552464	1.369127351
M6665	3A	701939041	0.065327807	0.412371134	99	0.270800424	0.298695754	0.001768369	2.521304141
M14630	7A	126783862	0.065480267	0.195876289	99	0.270800424	0.298663581	0.000415915	1.251341772
M6379	3A	56796407	0.065483027	0.360824742	99	0.270800424	0.298662999	0.000906291	-1.48027581
M1081	1B	85287651	0.065642715	0.175257732	99	0.270800424	0.29862939	0.000459084	-1.54754631
M194	1A	489600357	0.065687279	0.484536082	99	0.270800424	0.298620027	0.0011365	1.386650982
M4693	2B	723159590	0.065791366	0.371134021	99	0.270800424	0.298598184	0.000910833	1.45317926
M8149	3B	812610831	0.065833455	0.237113402	99	0.270800424	0.298589362	0.000676136	1.689533985
M4601	2B	551450193	0.065871617	0.206185567	99	0.270800424	0.298581368	0.000471798	1.356560357
M69	1A	10423224	0.06601309	0.360824742	99	0.270800424	0.298551778	0.001133088	-1.865691255
M1298	1B	65947056	0.066185647	0.164948454	99	0.270800424	0.298515781	0.000446634	1.612909611
M3138	2A	0	0.066190193	0.350515464	99	0.270800424	0.298514834	0.000634783	1.078832919
M11363	5B	179532863	0.066290056	0.432989691	99	0.270800424	0.298494049	0.001580748	-2.178091479
M14712	7A	519254464	0.066527419	0.453608247	99	0.270800424	0.298444782	0.000932641	-1.231053239
M1250	1B	452770206	0.066569637	0.432989691	99	0.270800424	0.29843604	0.000957546	-1.324954305
M1598	1B	400016805	0.066575217	0.340206186	99	0.270800424	0.298434885	0.000646367	1.138393234
M15061	7A	714349724	0.066577012	0.06185567	99	0.270800424	0.298434513	0.000258194	2.501118482
M13005	6B	11974839	0.066600201	0.453608247	99	0.270800424	0.298429714	0.000816157	-1.078476199
M4095	2B	409664071	0.066605277	0.371134021	99	0.270800424	0.298428664	0.001195153	-1.930384752
M894	1B	178656968	0.066646014	0.443298969	99	0.270800424	0.298420239	0.001000183	-1.353317246
M4539	2B	670299111	0.066687064	0.453608247	99	0.270800424	0.298411754	0.001292248	1.709814136
M6595	3A	659038151	0.066731187	0.319587629	99	0.270800424	0.298402641	0.000773778	1.454112139
M719	1B	6072803	0.066855232	0.422680412	99	0.270800424	0.298377055	0.000940541	-1.338885611
M13490	6B	640984009	0.066912476	0.309278351	99	0.270800424	0.298365266	0.000687273	-1.338225339
M3635	2B	504867107	0.066969604	0.360824742	99	0.270800424	0.298353511	0.001763999	2.946607468
M12718	6A	344058238	0.066980201	0.082474227	99	0.270800424	0.298351331	0.000266776	-1.949922794
M4344	2B	523028887	0.067126393	0.474226804	99	0.270800424	0.298321305	0.001150646	1.465856315
M8305	3D	19553185	0.067151172	0.422680412	99	0.270800424	0.298316223	0.001648528	2.357111912
M8803	4A	603746270	0.067231295	0.06185567	99	0.270800424	0.298299803	0.000267916	2.620797168
M1355	1B	7319459	0.06730432	0.402061856	99	0.270800424	0.298284856	0.00134663	-2.028807349
M14114	6D	0	0.06733748	0.134020619	99	0.270800424	0.298278075	0.000359835	-1.627165508
M13289	6B	230607608	0.067414173	0.422680412	99	0.270800424	0.298262405	0.001168983	-1.677991197
M7245	3B	0	0.067565821	0.24742268	99	0.270800424	0.298231477	0.000579874	-1.425161417
M14111	6D	470544254	0.067612943	0.278350515	99	0.270800424	0.298221882	0.000703755	1.538514321
M7250	3B	38671387	0.067752936	0.226804124	99	0.270800424	0.298193419	0.000561773	1.510361346
M12774	6A	21988381	0.067760416	0.474226804	99	0.270800424	0.2981919	0.00128642	-1.6543036
M9765	4D	394378216	0.067775668	0.092783505	99	0.270800424	0.298188803	0.000264722	1.740342772
M1634	1B	0	0.067783566	0.12371134	99	0.270800424	0.2981872	0.000294902	1.454234632
M8878	4A	631914750	0.067830668	0.412371134	99	0.270800424	0.298177643	0.001460405	-2.161989155
M913	1B	309086631	0.067962756	0.463917526	99	0.270800424	0.298150879	0.001177115	-1.551999759
M14323	7A	5748407	0.068037339	0.453608247	99	0.270800424	0.298135792	0.001347905	1.819568107
M8349	3D	41746632	0.068099981	0.206185567	99	0.270800424	0.298123135	0.000576932	-1.714967276
M12650	6A	594520636	0.068112001	0.474226804	99	0.270800424	0.298120708	0.001141448	1.475490086
M7985	3B	760719226	0.06827075	0.030927835	99	0.270800424	0.298088693	0.000135042	-2.682843225
M6136	3A	455701026	0.068416322	0.381443299	99	0.270800424	0.298059408	0.000733792	1.184527601
M6437	3A	526866497	0.06843566	0.257731959	99	0.270800424	0.298055522	0.000524116	1.252517907
M9227	4A	731340115	0.06852018	0.381443299	99	0.270800424	0.298038555	0.000827176	1.33729976
M5409	2D	20358088	0.06854252	0.257731959	99	0.270800424	0.298034074	0.000537974	-1.287643476
M4191	2B	704873966	0.06871598	0.113402062	99	0.270800424	0.297999336	0.000382992	-2.088663709
M6780	3A	722446569	0.068819152	0.381443299	99	0.270800424	0.297978719	0.001191656	1.934963321
M13033	6B	20821124	0.06882633	0.237113402	99	0.270800424	0.297977286	0.000604912	-1.580277132
M11270	5B	519661386	0.068832504	0.051546392	99	0.270800424	0.297976054	0.000207214	2.490326796
M12655	6A	512346041	0.068878903	0.412371134	99	0.270800424	0.297966795	0.000765495	1.150754831
M7978	3B	762845618	0.068880004	0.030927835	99	0.270800424	0.297966575	0.000121003	-2.425391013
M11061	5B	189721298	0.069019565	0.340206186	99	0.270800424	0.297938767	0.000825164	-1.506651486
M5941	2D	625109798	0.069192832	0.340206186	99	0.270800424	0.297904328	0.000787348	1.441212819
M10821	5B	408228341	0.069377781	0.402061856	99	0.270800424	0.29786767	0.000811906	1.260885683
M9234	4A	346700291	0.069411306	0.195876289	99	0.270800424	0.297861037	0.00040262	-1.284062916
M4766	2B	599789141	0.069544971	0.030927835	99	0.270800424	0.297834624	0.000126941	2.568974032
M4740	2B	728198487	0.069578998	0.12371134	99	0.270800424	0.297827909	0.000362152	1.833169562
M5391	2D	0	0.069592435	0.340206186	99	0.270800424	0.297825258	0.000927881	1.708262014
M2829	2A	579584012	0.069601819	0.319587629	99	0.270800424	0.297823408	0.000610923	-1.197456349
M14745	7A	538052365	0.069774485	0.402061856	99	0.270800424	0.2977894	0.000791533	1.236276204
M1616	1B	628627682	0.069783813	0.06185567	99	0.270800424	0.297787565	0.000207432	-2.106167284
M8739	4A	521603853	0.069812718	0.391752577	99	0.270800424	0.297781882	0.000694926	1.114560664
M2576	2A	71172019	0.069888796	0.309278351	99	0.270800424	0.297766936	0.000877347	1.784317306
M13609	6B	450081157	0.069945651	0.402061856	99	0.270800424	0.297755778	0.000722632	-1.131428945
M4531	2B	673234348	0.070002987	0.216494845	99	0.270800424	0.297744536	0.000445326	1.295955329
M858	1B	36034202	0.070065237	0.288659794	99	0.270800424	0.297732341	0.000695034	-1.518324524
M6477	3A	568024952	0.070261863	0.175257732	99	0.270800424	0.2976939	0.000358998	1.295321005
M5638	2D	0	0.070416391	0.494845361	99	0.270800424	0.297663771	0.001088279	-1.393756864
M4851	2B	744869635	0.070451602	0.432989691	99	0.270800424	0.297656916	0.001270067	-1.859868977
M1275	1B	432597563	0.070508911	0.350515464	99	0.270800424	0.297645767	0.001101772	1.994670259
M6640	3A	30035287	0.070520128	0.402061856	99	0.270800424	0.297643586	0.000963996	-1.521731666
M11489	5B	550320578	0.07057351	0.463917526	99	0.270800424	0.297633211	0.000988128	1.352871646
M12864	6A	611334867	0.070658305	0.360824742	99	0.270800424	0.297616749	0.001662291	2.929654741
M12135	6A	5480626	0.070757067	0.484536082	99	0.270800424	0.297597603	0.001122299	-1.47500964
M11959	5D	545694488	0.070807734	0.319587629	99	0.270800424	0.297587791	0.000693864	1.383591435
M9967	5A	283796742	0.070813388	0.288659794	99	0.270800424	0.297586697	0.000472668	-1.043585475
M4547	2B	37117645	0.070813452	0.288659794	99	0.270800424	0.297586684	0.000648484	1.43176406
M12782	6A	397083072	0.070896202	0.278350515	99	0.270800424	0.297570678	0.000592277	-1.357682375
M13566	6B	438806491	0.070896426	0.278350515	99	0.270800424	0.297570635	0.000547423	-1.254867219
M5255	2B	55935615	0.071073718	0.257731959	99	0.270800424	0.297536411	0.000528453	-1.311564416
M5847	2D	609493943	0.071108882	0.020618557	99	0.270800424	0.297529634	0.000117935	3.660599294
M4992	2B	90939783	0.071202013	0.154639175	99	0.270800424	0.297511703	0.000366545	1.518945059
M5007	2B	752394623	0.071245599	0.340206186	99	0.270800424	0.297503319	0.000883366	-1.664942193
M1671	1B	628033554	0.071281455	0.350515464	99	0.270800424	0.297496427	0.001970054	-3.605703025
M744	1B	2431679	0.071288369	0.443298969	99	0.270800424	0.297495099	0.000805027	-1.165131424
M11569	5B	685970589	0.071364845	0.319587629	99	0.270800424	0.297480413	0.001426758	-2.86739289
M7301	3B	19380506	0.071364845	0.319587629	99	0.270800424	0.297480413	0.001426758	-2.86739289
M8775	4A	584388334	0.071365093	0.082474227	99	0.270800424	0.297480365	0.000231135	1.800013707
M836	1B	19772673	0.071480573	0.463917526	99	0.270800424	0.297458222	0.000806916	1.11896925
M966	1B	50203925	0.071529473	0.134020619	99	0.270800424	0.297448857	0.000363566	1.74637977
M10203	5A	503872965	0.071548968	0.484536082	99	0.270800424	0.297445125	0.001371653	1.822905574
M7280	3B	0	0.071559065	0.319587629	99	0.270800424	0.297443193	0.001355012	-2.73061433
M904	1B	5549025	0.071643345	0.443298969	99	0.270800424	0.297427076	0.000775138	-1.127458395
M4743	2B	195996061	0.071661481	0.484536082	99	0.270800424	0.297423611	0.001115898	-1.485342678
M9261	4A	410117076	0.071702297	0.164948454	99	0.270800424	0.297415815	0.000367474	-1.437650842
M2818	2A	477627488	0.07179553	0.113402062	99	0.270800424	0.297398026	0.000277091	1.578854123
M5281	2B	549670301	0.071838865	0.051546392	99	0.270800424	0.297389766	0.000226964	2.846821456
M12698	6A	617183332	0.071982972	0.484536082	99	0.270800424	0.297362338	0.001312572	1.754968598
M4298	2B	556517600	0.072045706	0.206185567	99	0.270800424	0.297350417	0.000509792	1.603190203
M3909	2B	976743	0.07211216	0.278350515	99	0.270800424	0.2973378	0.000772432	-1.801022902
M5873	2D	601406100	0.072335508	0.144329897	99	0.270800424	0.297295491	0.000356112	1.606290206
M13183	6B	116136635	0.072383936	0.391752577	99	0.270800424	0.297286336	0.000726395	-1.207940667
M6620	3A	686200851	0.072499401	0.18556701	99	0.270800424	0.297264534	0.000387228	-1.36157816
M6695	3A	711289967	0.07260509	0.288659794	99	0.270800424	0.297244612	0.000647297	1.465300285
M8665	4A	125344732	0.072910746	0.051546392	99	0.270800424	0.297187174	0.000152115	-1.936459057
M3173	2A	0	0.073060084	0.422680412	99	0.270800424	0.297159206	0.000862626	1.34193998
M3296	2A	31477695	0.073113315	0.216494845	99	0.270800424	0.297149252	0.000457731	-1.39123938
M7288	3B	50022030	0.073187396	0.268041237	99	0.270800424	0.297135413	0.000487838	-1.198817898
M13439	6B	568869850	0.073247163	0.360824742	99	0.270800424	0.297124258	0.000615443	1.124410411
M9244	4A	719933935	0.073342791	0.402061856	99	0.270800424	0.297106432	0.000675796	1.109487438
M10521	5A	691820950	0.073356242	0.463917526	99	0.270800424	0.297103926	0.001118729	-1.592075006
M1336	1B	366877298	0.073479207	0.298969072	99	0.270800424	0.297081046	0.000589601	-1.304183656
M3243	2A	759767692	0.073484441	0.072164948	99	0.270800424	0.297080073	0.000220544	2.021191868
M12190	6A	9461899	0.073598943	0.360824742	99	0.270800424	0.297058806	0.000832607	-1.528473204
M4953	2B	762073843	0.073619448	0.144329897	99	0.270800424	0.297055001	0.00028478	-1.307339682
M7286	3B	0	0.073724808	0.298969072	99	0.270800424	0.29703547	0.000657778	-1.459853284
M3688	2B	38782061	0.073848376	0.226804124	99	0.270800424	0.297012603	0.000493164	1.445186415
M13184	6B	116136635	0.073917732	0.432989691	99	0.270800424	0.296999786	0.000968098	1.487417468
M13000	6B	14333860	0.073974996	0.484536082	99	0.270800424	0.296989214	0.000882974	-1.21324763
M9269	4A	730958734	0.074043326	0.340206186	99	0.270800424	0.29697661	0.000557211	-1.091454463
M4558	2B	51589506	0.074083206	0.309278351	99	0.270800424	0.29696926	0.000536555	-1.156715839
M14390	7A	29550908	0.074197325	0.402061856	99	0.270800424	0.296948251	0.000650399	-1.080233346
M6818	3A	728057245	0.074259855	0.092783505	99	0.270800424	0.296936754	0.000203522	1.466013981
M6274	3A	45708165	0.074269217	0.072164948	99	0.270800424	0.296935034	0.000195486	-1.81067845
M14035	6D	474655581	0.074453313	0.18556701	99	0.270800424	0.296901253	0.000420611	1.518818689
M15371	7B	426526640	0.074584753	0.329896907	99	0.270800424	0.296877189	0.000560763	1.141021667
M11167	5B	444349623	0.074785582	0.288659794	99	0.270800424	0.296840512	0.000670577	-1.563589818
M13168	6B	89695899	0.074915699	0.422680412	99	0.270800424	0.296816806	0.001445176	2.305281931
M8339	3D	37969599	0.075006695	0.422680412	99	0.270800424	0.296800254	0.000702809	1.122451898
M12509	6A	429939083	0.075271063	0.06185567	99	0.270800424	0.296752291	0.000191787	2.100440506
M6352	3A	432591149	0.075296584	0.298969072	99	0.270800424	0.29674767	0.000728408	-1.651073525
M2212	1D	475877262	0.075304854	0.257731959	99	0.270800424	0.296746173	0.000449545	-1.182144347
M5040	2B	767024523	0.075309874	0.237113402	99	0.270800424	0.296745265	0.000459163	-1.312518985
M1702	1B	453549548	0.075320703	0.453608247	99	0.270800424	0.296743305	0.000756621	-1.13071854
M11133	5B	0	0.075344338	0.319587629	99	0.270800424	0.296739029	0.000526131	-1.116342112
M14502	7A	62750954	0.075393795	0.340206186	99	0.270800424	0.296730086	0.000915116	-1.825206959
M11058	5B	0	0.075597918	0.319587629	99	0.270800424	0.296693245	0.000535863	-1.140816674
M9091	4A	690936373	0.075640855	0.309278351	99	0.270800424	0.296685509	0.000789757	-1.73837257
M2763	2A	489635273	0.075752705	0.309278351	99	0.270800424	0.29666538	0.000633744	1.397027026
M5975	2D	0	0.075796684	0.072164948	99	0.270800424	0.296657474	0.00025678	-2.427327415
M5993	2D	766158473	0.075796684	0.072164948	99	0.270800424	0.296657474	0.00025678	2.427327415
M1979	1D	305817	0.075993943	0.474226804	99	0.270800424	0.296622076	0.00083052	-1.197803247
M13824	6B	0	0.076058098	0.494845361	99	0.270800424	0.296610585	0.000921149	1.274231586
M3332	2A	0	0.076152471	0.432989691	99	0.270800424	0.2965937	0.00093379	1.47808025
M9926	5A	0	0.076316613	0.226804124	99	0.270800424	0.296564388	0.000412252	1.248456925
M4685	2B	704429363	0.076329704	0.226804124	99	0.270800424	0.296562053	0.000447212	1.354561785
M6013	2D	0	0.076431208	0.360824742	99	0.270800424	0.296543965	0.001520941	2.899540892
M4783	2B	733180507	0.076451928	0.113402062	99	0.270800424	0.296540276	0.000226345	-1.373350376
M14176	7A	8931851	0.076476223	0.381443299	99	0.270800424	0.296535951	0.000559464	1.009510506
M13863	6D	1585297	0.07649066	0.237113402	99	0.270800424	0.296533382	0.000696954	2.023478792
M10304	5A	727382944	0.076517352	0.474226804	99	0.270800424	0.296528634	0.001364578	-1.981593821
M14112	6D	470544254	0.076628062	0.484536082	99	0.270800424	0.296508959	0.001137982	-1.619718992
M3353	2A	766445675	0.076740194	0.350515464	99	0.270800424	0.296489063	0.00184864	-3.642592525
M3887	2B	0	0.076740194	0.350515464	99	0.270800424	0.296489063	0.00184864	-3.642592525
M6966	3B	10656805	0.076852674	0.134020619	99	0.270800424	0.296469137	0.000347958	1.795795205
M2308	1D	683382396	0.076862308	0.268041237	99	0.270800424	0.296467432	0.000465901	-1.202398257
M3708	2B	293132103	0.076864695	0.154639175	99	0.270800424	0.29646701	0.000325554	-1.456373595
M5328	2B	643640677	0.076866447	0.18556701	99	0.270800424	0.2964667	0.000362516	-1.351469388
M15221	7B	36484341	0.076981435	0.371134021	99	0.270800424	0.296446367	0.000623589	-1.164115701
M3545	2B	824552561	0.077048816	0.432989691	99	0.270800424	0.296434467	0.000942146	1.508860336
M837	1B	19772673	0.077073899	0.051546392	99	0.270800424	0.29643004	0.000173504	-2.334867626
M12467	6A	756832399	0.077126305	0.381443299	99	0.270800424	0.296420797	0.001229037	-2.236557367
M13738	6B	611901303	0.077133672	0.453608247	99	0.270800424	0.296419498	0.001102326	-1.68700265
M8774	4A	598434349	0.077133672	0.453608247	99	0.270800424	0.296419498	0.001102326	-1.68700265
M1039	1B	186525506	0.077190493	0.010309278	99	0.270800424	0.296409484	8.01279E-05	5.399603733
M1362	1B	691739942	0.077190493	0.010309278	99	0.270800424	0.296409484	8.01279E-05	5.399603733
M50	1A	0	0.077190493	0.010309278	99	0.270800424	0.296409484	8.01279E-05	5.399603733
M13048	6B	21459134	0.077190493	0.010309278	99	0.270800424	0.296409484	8.01279E-05	-5.399603733
M5634	2D	297509224	0.077190493	0.010309278	99	0.270800424	0.296409484	8.01279E-05	-5.399603733
M15075	7A	717597472	0.077196262	0.206185567	99	0.270800424	0.296408468	0.000349618	-1.178080024
M10967	5B	393940604	0.077259732	0.463917526	99	0.270800424	0.296397293	0.000759974	-1.139078422
M4751	2B	600038125	0.077266962	0.453608247	99	0.270800424	0.296396021	0.001154766	-1.770310657
M7973	3B	113713782	0.077297909	0.443298969	99	0.270800424	0.296390576	0.000853808	-1.339904448
M15176	7B	15592633	0.077768756	0.06185567	99	0.270800424	0.296308032	0.000184744	2.090439958
M2091	1D	612756863	0.077822098	0.226804124	99	0.270800424	0.296298715	0.000635748	1.963267912
M10609	5B	0	0.077843436	0.494845361	99	0.270800424	0.29629499	0.001203678	-1.704139953
M6993	3B	0	0.078025904	0.072164948	99	0.270800424	0.296263182	0.000207437	2.018553451
M8789	4A	597076028	0.078237698	0.226804124	99	0.270800424	0.296226364	0.000362724	-1.126118445
M13303	6B	471100656	0.078248953	0.463917526	99	0.270800424	0.296224411	0.001021254	-1.550293377
M13531	6B	655890375	0.078324779	0.329896907	99	0.270800424	0.296211258	0.000800603	-1.710727189
M6172	3A	234640908	0.07835064	0.309278351	99	0.270800424	0.296206775	0.000566341	-1.291259499
M9734	4D	16502547	0.078430133	0.24742268	99	0.270800424	0.296193006	0.000584556	-1.667678393
M148	1A	25807423	0.078437129	0.443298969	99	0.270800424	0.296191795	0.00067979	1.082536513
M2325	2A	3539454	0.07854017	0.371134021	99	0.270800424	0.296173971	0.000800608	1.524837554
M10038	5A	445275979	0.078566825	0.113402062	99	0.270800424	0.296169365	0.000372143	2.320441615
M10118	5A	742010724	0.078566825	0.113402062	99	0.270800424	0.296169365	0.000372143	-2.320441615
M1736	1B	635977802	0.078672734	0.278350515	99	0.270800424	0.296151079	0.000478213	1.216455343
M9524	4B	444886705	0.078683885	0.030927835	99	0.270800424	0.296149155	0.000128353	-2.93890753
M7351	3B	124651375	0.078807279	0.391752577	99	0.270800424	0.296127887	0.000676611	-1.224999518
M11623	5B	595052151	0.078815555	0.350515464	99	0.270800424	0.296126462	0.001739605	-3.520448346
M1826	1B	0	0.078868904	0.360824742	99	0.270800424	0.296117279	0.000605686	-1.191515441
M8477	3D	132061276	0.078949668	0.371134021	99	0.270800424	0.296103391	0.001260715	-2.413675664
M13771	6B	0	0.078963439	0.360824742	99	0.270800424	0.296101024	0.001409091	2.775308838
M4474	2B	638230965	0.079042237	0.278350515	99	0.270800424	0.296087491	0.000484127	1.237282527
M12668	6A	337842296	0.079200053	0.175257732	99	0.270800424	0.296060432	0.000401929	-1.634706592
M15342	7B	354961752	0.079245699	0.134020619	99	0.270800424	0.296052617	0.000302835	-1.611584875
M7505	3B	130253586	0.079292189	0.24742268	99	0.270800424	0.296044662	0.000436677	1.259486782
M7064	3B	54351100	0.079346584	0.092783505	99	0.270800424	0.296035361	0.000221154	1.702137792
M9282	4A	688382396	0.079414251	0.381443299	99	0.270800424	0.2960238	0.000637516	-1.194543488
M12487	6A	358607782	0.079575764	0.391752577	99	0.270800424	0.295996249	0.001141842	-2.08745617
M3052	2A	726414431	0.079610788	0.195876289	99	0.270800424	0.295990283	0.000386025	-1.412044263
M12435	6A	70821245	0.079633493	0.103092784	99	0.270800424	0.295986417	0.000264176	1.836553601
M15381	7B	470836213	0.079757886	0.164948454	99	0.270800424	0.295965257	0.000358639	-1.56072278
M14532	7A	69893107	0.079791112	0.402061856	99	0.270800424	0.295959611	0.000931691	-1.664087931
M14535	7A	65600063	0.079791112	0.402061856	99	0.270800424	0.295959611	0.000931691	-1.664087931
M5942	2D	625109798	0.079793122	0.432989691	99	0.270800424	0.295959269	0.000677921	1.124369956
M15397	7B	522729143	0.079796559	0.432989691	99	0.270800424	0.295958685	0.000797793	1.323241825
M11947	5D	542410598	0.079840074	0.216494845	99	0.270800424	0.295951296	0.000472961	1.569788468
M14505	7A	55923161	0.079887932	0.360824742	99	0.270800424	0.295943174	0.001141655	-2.274900171
M4576	2B	692104873	0.079998073	0.092783505	99	0.270800424	0.295924501	0.000186909	1.450375425
M8307	3D	0	0.080047518	0.391752577	99	0.270800424	0.295916128	0.000589038	1.083232762
M9259	4A	724783161	0.080149032	0.072164948	99	0.270800424	0.295898955	0.000218123	2.180294081
M483	1A	540712899	0.080164028	0.474226804	99	0.270800424	0.29589642	0.000999482	-1.520586035
M150	1A	27753403	0.080214498	0.412371134	99	0.270800424	0.295887893	0.000524759	-0.918686286
M3792	2B	77236275	0.080250234	0.092783505	99	0.270800424	0.295881858	0.000205233	-1.597590429
M733	1B	0	0.080344205	0.360824742	99	0.270800424	0.295866004	0.000593143	1.188667771
M15402	7B	511064939	0.080404191	0.360824742	99	0.270800424	0.295855894	0.001321965	-2.651213717
M1768	1B	641218775	0.080432451	0.010309278	99	0.270800424	0.295851134	3.95551E-05	2.777460658
M8566	4A	318817830	0.08044524	0.103092784	99	0.270800424	0.295848981	0.000204553	1.436548189
M8673	4A	232125986	0.08044638	0.381443299	99	0.270800424	0.295848789	0.000799226	-1.517010149
M10570	5B	13171598	0.080595456	0.24742268	99	0.270800424	0.295823715	0.000462695	1.356464443
M1105	1B	100817874	0.080622791	0.298969072	99	0.270800424	0.295819123	0.000493078	-1.19671105
M10010	5A	461913319	0.080664113	0.226804124	99	0.270800424	0.295812184	0.000320278	1.025176762
M922	1B	0	0.080844651	0.18556701	99	0.270800424	0.295781914	0.00034945	1.370183367
M9163	4A	348257403	0.080846021	0.432989691	99	0.270800424	0.295781685	0.001075372	1.807100359
M3298	2A	31477695	0.080930005	0.144329897	99	0.270800424	0.295767629	0.000248959	-1.256386178
M12764	6A	391337338	0.080986341	0.175257732	99	0.270800424	0.29575821	0.000327762	-1.363123169
M12383	6A	33024564	0.081036018	0.020618557	99	0.270800424	0.29574991	0.000101423	3.587557132
M7909	3B	159834993	0.081181639	0.288659794	99	0.270800424	0.295725611	0.000517957	-1.311014783
M13944	6D	24404067	0.081266053	0.494845361	99	0.270800424	0.295711548	0.000846218	-1.250732047
M10567	5B	11773089	0.081282797	0.175257732	99	0.270800424	0.29570876	0.000385661	-1.609793129
M13453	6B	59363266	0.081317235	0.350515464	99	0.270800424	0.295703028	0.000477361	-0.996700504
M4684	2B	733177784	0.081388871	0.350515464	99	0.270800424	0.295691114	0.000837695	-1.750596802
M9148	4A	22270015	0.081418137	0.164948454	99	0.270800424	0.295686251	0.000373373	-1.658662377
M8284	3D	7272771	0.081497674	0.371134021	99	0.270800424	0.295673041	0.001075018	-2.124577955
M13404	6B	159517660	0.081633711	0.329896907	99	0.270800424	0.295650481	0.000612666	1.364450046
M5036	2B	767121912	0.081661099	0.432989691	99	0.270800424	0.295645945	0.000784275	1.331216281
M12496	6A	317631893	0.081710524	0.206185567	99	0.270800424	0.295637761	0.000370883	-1.322813868
M14204	7A	13966199	0.081721774	0.226804124	99	0.270800424	0.295635899	0.000351369	1.139444421
M3008	2A	683749636	0.08180781	0.381443299	99	0.270800424	0.29562167	0.000460369	0.888614168
M3060	2A	731374489	0.081838113	0.288659794	99	0.270800424	0.295616662	0.000769862	-1.964377269
M13026	6B	19336874	0.081906113	0.113402062	99	0.270800424	0.295605431	0.000220674	1.43446095
M6484	3A	598916422	0.081912638	0.350515464	99	0.270800424	0.295604354	0.000543714	-1.14355377
M8003	3B	0	0.081933611	0.381443299	99	0.270800424	0.295600892	0.00122135	2.361102069
M8017	3B	771630784	0.081933611	0.381443299	99	0.270800424	0.295600892	0.00122135	2.361102069
M8046	3B	355244568	0.081933611	0.381443299	99	0.270800424	0.295600892	0.00122135	2.361102069
M8085	3B	796453795	0.081933611	0.381443299	99	0.270800424	0.295600892	0.00122135	2.361102069
M8087	3B	0	0.081933611	0.381443299	99	0.270800424	0.295600892	0.00122135	-2.361102069
M9312	4A	0	0.081956677	0.463917526	99	0.270800424	0.295597087	0.001007667	1.602149735
M956	1B	630186255	0.081981283	0.175257732	99	0.270800424	0.295593028	0.000408573	-1.720083331
M3993	2B	543306948	0.081984843	0.391752577	99	0.270800424	0.295592441	0.001253922	-2.36175459
M11942	5D	490937616	0.081988095	0.371134021	99	0.270800424	0.295591905	0.00061447	-1.221695558
M11958	5D	48030503	0.082145654	0.381443299	99	0.270800424	0.295565951	0.000802293	1.554998528
M2786	2A	566856432	0.082226403	0.195876289	99	0.270800424	0.295552671	0.0003338	1.26112427
M2967	2A	705551828	0.082228501	0.443298969	99	0.270800424	0.295552326	0.000797849	1.331953577
M6178	3A	348215507	0.082286952	0.12371134	99	0.270800424	0.295542722	0.000347696	2.081437759
M1056	1B	3440095	0.082385498	0.030927835	99	0.270800424	0.295526547	0.000122483	-2.936436797
M7122	3B	25942617	0.082510856	0.226804124	99	0.270800424	0.295506002	0.000372357	-1.219164619
M4074	2B	236592763	0.082512478	0.463917526	99	0.270800424	0.295505737	0.000621667	-0.995128558
M11335	5B	529608885	0.082653501	0.463917526	99	0.270800424	0.295482666	0.001138126	1.824960236
M12000	5D	555036729	0.08266685	0.154639175	99	0.270800424	0.295480484	0.000298811	-1.437643478
M14079	6D	458025308	0.082979289	0.432989691	99	0.270800424	0.295429533	0.000587585	1.013456801
M3142	2A	755679306	0.082987166	0.268041237	99	0.270800424	0.295428251	0.000342584	-0.95459308
M12638	6A	127197562	0.082990287	0.474226804	99	0.270800424	0.295427743	0.000697516	1.098595735
M889	1B	630581864	0.083014073	0.402061856	99	0.270800424	0.295423874	0.001230506	2.286573171
M13125	6B	51997445	0.083031939	0.474226804	99	0.270800424	0.295420968	0.001052651	-1.658770026
M815	1B	183264864	0.083050975	0.134020619	99	0.270800424	0.295417873	0.00030751	-1.715044985
M10239	5A	534107889	0.083103142	0.422680412	99	0.270800424	0.295409394	0.001281831	-2.268186262
M12631	6A	0	0.083141589	0.309278351	99	0.270800424	0.295403149	0.000487057	-1.178395879
M6086	3A	7794910	0.083172948	0.216494845	99	0.270800424	0.295398058	0.000384594	1.329777646
M10601	5B	28880693	0.083310531	0.268041237	99	0.270800424	0.295375745	0.000347242	0.971344094
M2047	1D	10650564	0.083460522	0.268041237	99	0.270800424	0.295351466	0.000582402	1.632093681
M14743	7A	577687730	0.083478412	0.381443299	99	0.270800424	0.295348574	0.000658849	-1.297694662
M4263	2B	328673302	0.083516139	0.371134021	99	0.270800424	0.295342476	0.001033958	-2.094041003
M2392	2A	24002743	0.083521474	0.381443299	99	0.270800424	0.295341614	0.000759291	1.49630009
M9287	4A	51243538	0.08354489	0.422680412	99	0.270800424	0.295337831	0.001077535	1.916821026
M1559	1B	685243263	0.083607601	0.371134021	99	0.270800424	0.295327706	0.000843838	-1.7108692
M8891	4A	668288144	0.08370093	0.453608247	99	0.270800424	0.295312652	0.00085413	-1.418456606
M9733	4D	16502547	0.083954677	0.288659794	99	0.270800424	0.295271816	0.000395665	1.035687125
M14601	7A	102061623	0.084000162	0.350515464	99	0.270800424	0.295264511	0.000863351	1.862099972
M3519	2B	0	0.084032747	0.134020619	99	0.270800424	0.29525928	0.000230082	-1.298382528
M13360	6B	205236003	0.08404124	0.381443299	99	0.270800424	0.295257917	0.000656768	-1.302316876
M13151	6B	100895291	0.084090691	0.412371134	99	0.270800424	0.295249983	0.001113535	2.043647313
M1164	1B	22864252	0.084155963	0.113402062	99	0.270800424	0.29523952	0.000221736	-1.480956856
M5994	2D	766158473	0.084413468	0.402061856	99	0.270800424	0.295198326	0.001245466	2.353386355
M6007	2D	642133932	0.084413468	0.402061856	99	0.270800424	0.295198326	0.001245466	2.353386355
M13894	6D	7194101	0.084483239	0.432989691	99	0.270800424	0.295187188	0.001098411	1.928859074
M14368	7A	20403281	0.084506553	0.340206186	99	0.270800424	0.295183469	0.000776132	-1.735107705
M15092	7A	721737081	0.0845374	0.484536082	99	0.270800424	0.29517855	0.001267669	-1.990541608
M6881	3A	609286936	0.084566907	0.226804124	99	0.270800424	0.295173846	0.000356245	-1.195476942
M13727	6B	708271328	0.084583444	0.319587629	99	0.270800424	0.29517121	0.00051582	1.228673258
M2519	2A	34350090	0.08459469	0.371134021	99	0.270800424	0.295169418	0.000530953	-1.089208769
M10833	5B	417804694	0.084635147	0.474226804	99	0.270800424	0.295162974	0.000987262	-1.585767402
M7411	3B	379344423	0.084652132	0.030927835	99	0.270800424	0.29516027	0.000122876	-3.026894073
M14014	6D	339389407	0.084957094	0.463917526	99	0.270800424	0.295111813	0.000892192	1.470482148
M803	1B	19233594	0.08502336	0.350515464	99	0.270800424	0.295101309	0.00142584	3.112750741
M911	1B	137436650	0.08502336	0.350515464	99	0.270800424	0.295101309	0.00142584	-3.112750741
M6435	3A	535005885	0.085232051	0.144329897	99	0.270800424	0.295068287	0.000371846	-1.976295219
M3323	2A	0	0.085362562	0.360824742	99	0.270800424	0.295047682	0.001287972	-2.742331692
M3307	2A	244963962	0.085362562	0.360824742	99	0.270800424	0.295047682	0.001287972	2.742331692
M13315	6B	459422335	0.085393119	0.412371134	99	0.270800424	0.295042862	0.000570691	1.063599909
M10881	5B	0	0.085399896	0.422680412	99	0.270800424	0.295041793	0.000580185	-1.055003404
M5197	2B	647814104	0.085525778	0.051546392	99	0.270800424	0.295021961	0.000153766	-2.296152739
M8022	3B	775710699	0.085603143	0.360824742	99	0.270800424	0.295009788	0.00125636	2.682563058
M8049	3B	12179959	0.085603143	0.360824742	99	0.270800424	0.295009788	0.00125636	-2.682563058
M13308	6B	437468761	0.085617797	0.432989691	99	0.270800424	0.295007484	0.000653005	-1.162105283
M6732	3A	717015565	0.085654365	0.06185567	99	0.270800424	0.295001735	0.000154812	-1.929379633
M13954	6D	95594839	0.085796919	0.381443299	99	0.270800424	0.294979352	0.00073916	-1.496313309
M9375	4A	733921790	0.085988943	0.432989691	99	0.270800424	0.294949265	0.000555397	-0.992684749
M1961	1D	585308022	0.086019855	0.381443299	99	0.270800424	0.294944428	0.00064814	-1.315466833
M746	1B	2431679	0.086034043	0.360824742	99	0.270800424	0.294942209	0.00067956	-1.458291233
M947	1B	711939962	0.086034043	0.360824742	99	0.270800424	0.294942209	0.00067956	-1.458291233
M7025	3B	15100130	0.086070836	0.432989691	99	0.270800424	0.294936456	0.000623061	1.114683376
M745	1B	2431679	0.08618722	0.288659794	99	0.270800424	0.294918276	0.000558992	-1.502120474
M6392	3A	363608529	0.086295603	0.463917526	99	0.270800424	0.29490137	0.000741398	-1.241200057
M4204	2B	677048859	0.086346643	0.360824742	99	0.270800424	0.294893416	0.001417708	-3.053362364
M4505	2B	548631440	0.086346643	0.360824742	99	0.270800424	0.294893416	0.001417708	-3.053362364
M1358	1B	7319459	0.086604106	0.309278351	99	0.270800424	0.294853375	0.000433294	1.091979635
M10195	5A	503430449	0.086781202	0.268041237	99	0.270800424	0.294825909	0.000326546	-0.951505962
M4627	2B	689711741	0.086865196	0.309278351	99	0.270800424	0.294812904	0.000407635	1.030409256
M11414	5B	233925191	0.086884289	0.484536082	99	0.270800424	0.29480995	0.000528754	0.853318872
M1192	1B	143362254	0.086999382	0.288659794	99	0.270800424	0.294792156	0.000528914	1.434687361
M2553	2A	83223921	0.087009692	0.474226804	99	0.270800424	0.294790563	0.000673256	1.111742508
M2381	2A	19836679	0.087067182	0.422680412	99	0.270800424	0.294781686	0.000861432	-1.597002629
M5680	2D	0	0.08709588	0.298969072	99	0.270800424	0.294777257	0.000511129	1.340122956
M13955	6D	97102783	0.087109378	0.443298969	99	0.270800424	0.294775174	0.001117341	-1.976042636
M7398	3B	327305784	0.08714941	0.082474227	99	0.270800424	0.294769	0.000137052	1.303385731
M2205	1D	432636879	0.087168447	0.350515464	99	0.270800424	0.294766065	0.000583925	-1.306927558
M12846	6A	607934652	0.087179835	0.257731959	99	0.270800424	0.294764309	0.00048036	-1.462370274
M3000	2A	713536628	0.087417	0.164948454	99	0.270800424	0.294727808	0.000311687	-1.486651256
M5586	2D	459879715	0.087449624	0.484536082	99	0.270800424	0.294722795	0.000741247	-1.204030163
M6063	3A	9012647	0.087485099	0.340206186	99	0.270800424	0.294717347	0.00055245	1.278579049
M9692	4B	661245757	0.087543353	0.412371134	99	0.270800424	0.294708406	0.000633802	-1.210964095
M8526	3D	612391994	0.087568767	0.164948454	99	0.270800424	0.294704507	0.000324216	-1.549096812
M11901	5D	175947785	0.087579356	0.134020619	99	0.270800424	0.294702883	0.000308438	1.814013775
M6767	3A	489299704	0.087636195	0.072164948	99	0.270800424	0.294694169	0.000163591	1.787960176
M14456	7A	38951100	0.087637667	0.402061856	99	0.270800424	0.294693943	0.000667832	-1.310108969
M11788	5B	688224445	0.087653674	0.422680412	99	0.270800424	0.29469149	0.000616131	-1.149935149
M736	1B	716071071	0.087661129	0.113402062	99	0.270800424	0.294690348	0.000195564	-1.360557192
M10700	5B	326575231	0.087798263	0.422680412	99	0.270800424	0.294669356	0.000850984	-1.590881452
M182	1A	344675281	0.087871272	0.412371134	99	0.270800424	0.294658195	0.000567044	1.087470832
M10964	5B	567730502	0.087965372	0.443298969	99	0.270800424	0.294643825	0.000881589	-1.574430683
M8167	3B	815300848	0.088037625	0.06185567	99	0.270800424	0.294632802	0.000169825	-2.175372118
M8650	4A	303362512	0.0882289	0.319587629	99	0.270800424	0.294603671	0.000584296	-1.451765498
M1794	1B	643950881	0.088294485	0.216494845	99	0.270800424	0.294593698	0.000358252	-1.314975207
M10582	5B	21538502	0.088366992	0.278350515	99	0.270800424	0.294582682	0.00038671	1.104906742
M260	1A	387811947	0.088618102	0.278350515	99	0.270800424	0.294544608	0.000400057	1.146291503
M14450	7A	37081907	0.088648153	0.226804124	99	0.270800424	0.29454006	0.000380717	-1.339254011
M1068	1B	174663837	0.088658734	0.494845361	99	0.270800424	0.294538459	0.000975791	1.573444693
M1258	1B	390280239	0.088712949	0.257731959	99	0.270800424	0.294530258	0.000361796	-1.120792597
M6880	3A	757610977	0.088727998	0.278350515	99	0.270800424	0.294527983	0.000456718	-1.310265427
M413	1A	97149083	0.088818344	0.391752577	99	0.270800424	0.294514332	0.000975749	-1.991001328
M6140	3A	309672008	0.088932693	0.329896907	99	0.270800424	0.294497077	0.000426933	-1.035821602
M14728	7A	495536855	0.089122144	0.340206186	99	0.270800424	0.294468542	0.000548746	-1.293770652
M32	1A	7078505	0.089274935	0.072164948	99	0.270800424	0.294445577	0.000171727	1.911981112
M2115	1D	472550886	0.089289502	0.412371134	99	0.270800424	0.29444339	0.000644419	1.255806332
M11145	5B	502377352	0.089306794	0.288659794	99	0.270800424	0.294440794	0.000468192	1.303660248
M1524	1B	564653618	0.089412269	0.432989691	99	0.270800424	0.294424973	0.000682002	1.267500048
M3325	2A	761319429	0.089552675	0.402061856	99	0.270800424	0.294403944	0.000636164	-1.27525636
M4324	2B	691821263	0.089560959	0.463917526	99	0.270800424	0.294402704	0.000665363	-1.156056974
M14550	7A	74674604	0.089566519	0.195876289	99	0.270800424	0.294401872	0.000248547	1.022855304
M9986	5A	72230055	0.089600317	0.206185567	99	0.270800424	0.294396816	0.000327843	1.28220987
M11819	5B	212365503	0.089637491	0.175257732	99	0.270800424	0.294391258	0.000319582	1.471085147
M7804	3B	720217864	0.089638558	0.134020619	99	0.270800424	0.294391098	0.000236001	1.42062611
M3559	2B	0	0.089647961	0.360824742	99	0.270800424	0.294389693	0.000539946	-1.207360626
M8993	4A	637896815	0.089711141	0.164948454	99	0.270800424	0.294380253	0.000326796	1.5996216
M10110	5A	351863234	0.08975574	0.051546392	99	0.270800424	0.294373594	0.000163867	-2.568018658
M8233	3B	823095734	0.089786987	0.391752577	99	0.270800424	0.29436893	0.001014272	-2.092176493
M6747	3A	716847034	0.089806333	0.164948454	99	0.270800424	0.294366044	0.000209516	1.026640975
M2814	2A	275909182	0.08980804	0.12371134	99	0.270800424	0.294365789	0.000230357	-1.505044355
M14379	7A	0	0.089892565	0.216494845	99	0.270800424	0.294353187	0.000392014	1.464939859
M2510	2A	51108076	0.089943552	0.412371134	99	0.270800424	0.294345591	0.000586704	1.151710111
M7456	3B	248134968	0.090049977	0.134020619	99	0.270800424	0.294329752	0.000203126	-1.228341363
M3871	2B	106962921	0.090110172	0.278350515	99	0.270800424	0.294320802	0.000496189	1.445676841
M13523	6B	643641495	0.090199553	0.288659794	99	0.270800424	0.294307525	0.000572455	-1.609912299
M2298	1D	488579573	0.090223551	0.329896907	99	0.270800424	0.294303963	0.000474209	-1.167222804
M6701	3A	712285937	0.090258671	0.319587629	99	0.270800424	0.294298751	0.000546922	-1.390166005
M10480	5A	612723577	0.090266063	0.164948454	99	0.270800424	0.294297655	0.000303519	-1.494876416
M9955	5A	52357838	0.090274832	0.24742268	99	0.270800424	0.294296354	0.000382453	-1.255880293
M2280	1D	484303414	0.090339309	0.340206186	99	0.270800424	0.294286794	0.000892661	2.133358018
M10516	5A	684647811	0.090426311	0.381443299	99	0.270800424	0.294273907	0.000464272	0.990558087
M4302	2B	586890691	0.090437518	0.18556701	99	0.270800424	0.294272248	0.000296393	1.300044301
M13983	6D	86013961	0.090487919	0.453608247	99	0.270800424	0.294264789	0.001065168	-1.912362824
M6781	3A	719820906	0.090566747	0.329896907	99	0.270800424	0.294253133	0.000531337	1.312813504
M7552	3B	473710563	0.090569241	0.237113402	99	0.270800424	0.294252764	0.000299322	1.028977008
M8618	4A	134069682	0.090719303	0.309278351	99	0.270800424	0.294230606	0.000648134	1.711030719
M8928	4A	659678759	0.090719303	0.309278351	99	0.270800424	0.294230606	0.000648134	1.711030719
M4117	2B	0	0.090731051	0.020618557	99	0.270800424	0.294228873	8.74197E-05	-3.46217957
M9816	4D	507006414	0.090785575	0.030927835	99	0.270800424	0.294220833	7.11944E-05	1.880857425
M321	1A	478261760	0.090798632	0.06185567	99	0.270800424	0.294218909	0.000117195	-1.548285829
M691	1A	491632757	0.090798953	0.391752577	99	0.270800424	0.294218862	0.000593235	1.237480667
M15066	7A	715784906	0.09090214	0.298969072	99	0.270800424	0.294203663	0.000436313	1.193956708
M6713	3A	669396058	0.090965903	0.319587629	99	0.270800424	0.294194281	0.000531574	-1.36174192
M7272	3B	478901478	0.09102755	0.484536082	99	0.270800424	0.294185218	0.000593298	1.003141994
M2782	2A	401601805	0.091217574	0.484536082	99	0.270800424	0.294157321	0.001040166	-1.762371644
M11865	5B	696578657	0.091247982	0.092783505	99	0.270800424	0.294152863	0.000164151	-1.452910569
M7287	3B	50022030	0.091333358	0.443298969	99	0.270800424	0.294140355	0.000718114	-1.331584272
M14571	7A	83070191	0.091337014	0.329896907	99	0.270800424	0.29413982	0.000471411	-1.174655279
M8441	3D	524197814	0.091384727	0.432989691	99	0.270800424	0.294132836	0.000569213	-1.081218062
M15083	7A	723305650	0.091483726	0.288659794	99	0.270800424	0.294118357	0.000406608	-1.159782147
M14144	7A	4440321	0.091536011	0.278350515	99	0.270800424	0.294110717	0.000460674	-1.363441468
M8348	3D	41035027	0.091566916	0.381443299	99	0.270800424	0.294106204	0.000450271	0.972803585
M10439	5A	362054918	0.091619081	0.18556701	99	0.270800424	0.294098589	0.00032572	1.447345402
M12712	6A	376301249	0.091730279	0.484536082	99	0.270800424	0.294082373	0.000920904	1.569073891
M3735	2B	73002301	0.091736258	0.422680412	99	0.270800424	0.294081502	0.000555558	-1.085176681
M3458	2B	563859723	0.091762423	0.092783505	99	0.270800424	0.29407769	0.000232102	-2.065933242
M15178	7B	23321358	0.091815936	0.164948454	99	0.270800424	0.294069897	0.000305583	-1.530882995
M10865	5B	128642164	0.09183594	0.082474227	99	0.270800424	0.294066985	0.0001623	1.62650028
M10757	5B	429171723	0.091903706	0.051546392	99	0.270800424	0.294057126	0.000107028	1.717418468
M6499	3A	533037386	0.091961979	0.484536082	99	0.270800424	0.294048655	0.000637933	1.089681434
M6827	3A	742590041	0.092178217	0.402061856	99	0.270800424	0.29401727	0.000860344	-1.775210935
M1608	1B	434594722	0.092255202	0.113402062	99	0.270800424	0.294006117	0.000183174	1.34114889
M13182	6B	93428436	0.092346104	0.350515464	99	0.270800424	0.29399296	0.000541615	-1.284234278
M2619	2A	104921223	0.092376533	0.309278351	99	0.270800424	0.293988559	0.000513634	-1.380728758
M8138	3B	802901851	0.092441311	0.175257732	99	0.270800424	0.293979196	0.000241388	-1.145901269
M4901	2B	751843230	0.092447132	0.350515464	99	0.270800424	0.293978354	0.001464122	3.475410878
M5741	2D	598804526	0.092506998	0.195876289	99	0.270800424	0.293969708	0.000383872	-1.631629514
M8161	3B	817331152	0.092587441	0.422680412	99	0.270800424	0.293958099	0.000874163	-1.723354631
M14040	6D	421558768	0.092747943	0.154639175	99	0.270800424	0.29393497	0.00026961	-1.455336335
M1560	1B	685243263	0.09277598	0.051546392	99	0.270800424	0.293930935	0.000155613	2.520720493
M14546	7A	66283565	0.092783887	0.494845361	99	0.270800424	0.293929797	0.000898699	1.51656094
M8185	3B	820905679	0.092875385	0.113402062	99	0.270800424	0.293916637	0.000255918	1.886355356
M5111	2B	450656765	0.092892065	0.412371134	99	0.270800424	0.29391424	0.000742556	1.505435566
M5596	2D	88591365	0.092903807	0.463917526	99	0.270800424	0.293912552	0.000513756	-0.925959817
M7212	3B	0	0.092908688	0.422680412	99	0.270800424	0.293911851	0.00053783	1.063976708
M4794	2B	724734789	0.09295582	0.360824742	99	0.270800424	0.29390508	0.000717524	-1.663639721
M12461	6A	106663978	0.092999065	0.092783505	99	0.270800424	0.293898872	0.000197923	-1.785441028
M14388	7A	702331405	0.09306304	0.381443299	99	0.270800424	0.293889692	0.000867496	-1.904835098
M14394	7A	29138301	0.09306304	0.381443299	99	0.270800424	0.293889692	0.000867496	-1.904835098
M3912	2B	63622881	0.093116968	0.12371134	99	0.270800424	0.29388196	0.000217294	-1.472005011
M1322	1B	0	0.093503436	0.319587629	99	0.270800424	0.293826692	0.000971972	-2.559375455
M15125	7A	734524063	0.093528468	0.453608247	99	0.270800424	0.293823121	0.000756143	1.403167373
M7036	3B	15808845	0.093692483	0.474226804	99	0.270800424	0.293799749	0.00062055	-1.10341302
M9813	4D	507006414	0.093693351	0.257731959	99	0.270800424	0.293799626	0.000438775	1.435571953
M3217	2A	781829002	0.093737826	0.443298969	99	0.270800424	0.293793296	0.00067342	-1.281582155
M4080	2B	138508909	0.093869678	0.226804124	99	0.270800424	0.29377455	0.000297571	1.108426844
M11057	5B	0	0.09391344	0.020618557	99	0.270800424	0.293768334	6.69399E-05	-2.74408214
M4699	2B	728611163	0.093915745	0.402061856	99	0.270800424	0.293768007	0.000789407	-1.659545053
M14391	7A	29138301	0.09393611	0.463917526	99	0.270800424	0.293765116	0.000680104	1.2393948
M11126	5B	698122265	0.093945669	0.484536082	99	0.270800424	0.293763759	0.000764431	1.333925933
M8220	3B	825858484	0.094005018	0.103092784	99	0.270800424	0.293755338	0.000203039	-1.666268268
M8260	3D	0	0.09405139	0.360824742	99	0.270800424	0.293748762	0.000523463	-1.227998453
M15384	7B	451187047	0.094058741	0.020618557	99	0.270800424	0.29374772	7.43088E-05	3.050871668
M2140	1D	688816452	0.094058741	0.020618557	99	0.270800424	0.29374772	7.43088E-05	3.050871668
M15430	7B	535456944	0.094058741	0.020618557	99	0.270800424	0.29374772	7.43088E-05	-3.050871668
M2166	1D	426987465	0.094062761	0.453608247	99	0.270800424	0.29374715	0.000849397	1.585222359
M5410	2D	20358088	0.094115684	0.237113402	99	0.270800424	0.293739651	0.000346572	1.238060955
M715	1B	0	0.094124428	0.463917526	99	0.270800424	0.293738413	0.000631456	-1.153046805
M13414	6B	392948564	0.094462986	0.319587629	99	0.270800424	0.293690554	0.000399654	1.063159866
M4105	2B	510796274	0.094486851	0.371134021	99	0.270800424	0.293687188	0.001114268	-2.553128863
M1666	1B	588503113	0.094553926	0.422680412	99	0.270800424	0.293677732	0.000461606	-0.929353694
M13534	6B	655890375	0.094904225	0.432989691	99	0.270800424	0.293628465	0.000493669	-0.97383637
M2256	1D	470523363	0.095049683	0.453608247	99	0.270800424	0.293608067	0.001065301	-2.009021568
M6466	3A	91013228	0.095087118	0.257731959	99	0.270800424	0.293602823	0.000454968	-1.510693595
M12669	6A	478309953	0.095117029	0.443298969	99	0.270800424	0.293598635	0.00067316	1.299938093
M6823	3A	731113205	0.095140414	0.051546392	99	0.270800424	0.293595361	0.000128058	2.127245815
M2036	1D	21254198	0.095140619	0.412371134	99	0.270800424	0.293595332	0.000569512	-1.182560632
M7077	3B	20999249	0.0951878	0.257731959	99	0.270800424	0.29358873	0.000333628	1.108965167
M7494	3B	332877259	0.095231903	0.329896907	99	0.270800424	0.293582562	0.000475697	1.235882496
M3067	2A	642784267	0.09527633	0.494845361	99	0.270800424	0.293576352	0.000662754	-1.148444663
M2713	2A	133353425	0.095277743	0.463917526	99	0.270800424	0.293576155	0.001312143	-2.425349308
M1546	1B	564637524	0.095283638	0.268041237	99	0.270800424	0.293575331	0.00041813	1.337737055
M9820	4D	30126321	0.095427545	0.412371134	99	0.270800424	0.293555239	0.000513729	-1.069946329
M1647	1B	404149662	0.095531254	0.432989691	99	0.270800424	0.29354078	0.000946851	-1.880147739
M13311	6B	0	0.095569559	0.422680412	99	0.270800424	0.293535444	0.000779653	-1.586540864
M462	1A	536664269	0.095658029	0.463917526	99	0.270800424	0.293523129	0.000736043	1.36592304
M3292	2A	645613495	0.095665307	0.195876289	99	0.270800424	0.293522116	0.000273124	1.200537063
M4916	2B	759189621	0.095690261	0.340206186	99	0.270800424	0.293518645	0.00059302	-1.501195636
M13004	6B	17701756	0.095772914	0.474226804	99	0.270800424	0.293507155	0.000595547	1.082468712
M5714	2D	610403424	0.095912891	0.195876289	99	0.270800424	0.293487722	0.000294689	-1.298679349
M9286	4A	725941577	0.096008865	0.422680412	99	0.270800424	0.293474416	0.000625507	1.27871531
M14780	7A	614780849	0.096114293	0.319587629	99	0.270800424	0.293459816	0.000397762	1.07662439
M4917	2B	749968556	0.096154674	0.340206186	99	0.270800424	0.293454228	0.000608316	-1.547391798
M6376	3A	56679772	0.096166971	0.474226804	99	0.270800424	0.293452528	0.000861962	1.573151
M6343	3A	142889812	0.096184214	0.18556701	99	0.270800424	0.293450143	0.00027484	-1.282111609
M8032	3B	776544907	0.096246205	0.051546392	99	0.270800424	0.293441573	0.000131852	-2.21571533
M4727	2B	712642131	0.096341842	0.412371134	99	0.270800424	0.293428364	0.000621691	1.307205489
M10037	5A	445275979	0.09637222	0.494845361	99	0.270800424	0.293424172	0.000882475	1.546776352
M9325	4A	650837952	0.096429631	0.134020619	99	0.270800424	0.293416253	0.000216193	-1.399986171
M15511	7B	597080664	0.096446346	0.443298969	99	0.270800424	0.293413948	0.000733508	-1.436271026
M3385	2A	588436341	0.096457016	0.309278351	99	0.270800424	0.293412477	0.000407666	-1.144276283
M5931	2D	619962487	0.096494146	0.18556701	99	0.270800424	0.293407359	0.000330072	1.54472371
M13006	6B	11974839	0.096502538	0.360824742	99	0.270800424	0.293406203	0.000429278	1.033293357
M13061	6B	15357875	0.096639724	0.381443299	99	0.270800424	0.293387316	0.000538052	-1.226851728
M4759	2B	0	0.096745285	0.432989691	99	0.270800424	0.293372803	0.000824155	-1.657310536
M12515	6A	143013871	0.096795163	0.381443299	99	0.270800424	0.293365952	0.000900929	2.057580934
M7131	3B	24940760	0.096799756	0.144329897	99	0.270800424	0.293365321	0.000209788	1.266311642
M8937	4A	684963131	0.096839124	0.257731959	99	0.270800424	0.293359917	0.000327122	1.10620289
M13910	6D	10760221	0.096865447	0.350515464	99	0.270800424	0.293356304	0.000491805	1.22319818
M5799	2D	732568622	0.096880377	0.237113402	99	0.270800424	0.293354256	0.000341193	1.254647566
M6912	3B	3064404	0.0968816	0.226804124	99	0.270800424	0.293354088	0.000331059	-1.272735527
M10242	5A	224479989	0.096895085	0.360824742	99	0.270800424	0.293352238	0.000421644	1.019047345
M7509	3B	485581903	0.096997294	0.350515464	99	0.270800424	0.293338227	0.000524746	-1.306905931
M8083	3B	49383194	0.097116445	0.371134021	99	0.270800424	0.293321914	0.001017426	2.396113958
M8015	3B	10930676	0.097116445	0.371134021	99	0.270800424	0.293321914	0.001017426	-2.396113958
M8018	3B	771630784	0.097116445	0.371134021	99	0.270800424	0.293321914	0.001017426	-2.396113958
M8078	3B	793010867	0.097116445	0.371134021	99	0.270800424	0.293321914	0.001017426	-2.396113958
M8086	3B	796453795	0.097116445	0.371134021	99	0.270800424	0.293321914	0.001017426	-2.396113958
M1049	1B	111514140	0.097154954	0.350515464	99	0.270800424	0.293316646	0.001471784	3.671507308
M11667	5B	495035120	0.097154954	0.350515464	99	0.270800424	0.293316646	0.001471784	3.671507308
M9124	4A	702727123	0.097154954	0.350515464	99	0.270800424	0.293316646	0.001471784	3.671507308
M11660	5B	18994764	0.097154954	0.350515464	99	0.270800424	0.293316646	0.001471784	-3.671507308
M10413	5A	469501411	0.097190794	0.484536082	99	0.270800424	0.293311746	0.000824042	1.487615247
M4297	2B	556517600	0.097358727	0.18556701	99	0.270800424	0.293288811	0.000315554	-1.490015759
M8745	4A	478288955	0.097372022	0.381443299	99	0.270800424	0.293286997	0.000679547	-1.561228145
M14995	7A	327653785	0.097608473	0.18556701	99	0.270800424	0.293254784	0.000276154	-1.307317691
M1433	1B	529627736	0.097628703	0.103092784	99	0.270800424	0.293252032	0.000173001	1.474484563
M4818	2B	606156145	0.097747486	0.340206186	99	0.270800424	0.293235885	0.000475951	1.230745518
M3176	2A	0	0.097791279	0.350515464	99	0.270800424	0.293229938	0.000503962	-1.26541578
M13670	6B	698461241	0.097809087	0.453608247	99	0.270800424	0.293227521	0.000548695	-1.064809401
M15370	7B	451485910	0.097811862	0.360824742	99	0.270800424	0.293227144	0.00045401	1.107650426
M9895	5A	82132019	0.097829729	0.412371134	99	0.270800424	0.293224719	0.000809385	-1.728145868
M5885	2D	604056456	0.097884006	0.226804124	99	0.270800424	0.293217355	0.000349543	-1.357701659
M3171	2A	648163092	0.09791383	0.453608247	99	0.270800424	0.293213311	0.00071727	1.393440056
M6793	3A	729609868	0.098034257	0.412371134	99	0.270800424	0.293196994	0.000842859	-1.803378078
M6075	3A	13034982	0.09813364	0.268041237	99	0.270800424	0.293183545	0.000338369	1.114934951
M1825	1B	0	0.098188548	0.329896907	99	0.270800424	0.293176121	0.000455087	1.219043863
M2949	2A	549728944	0.098195635	0.257731959	99	0.270800424	0.293175163	0.00028492	0.97698752
M3237	2A	760509250	0.098247827	0.412371134	99	0.270800424	0.293168112	0.000651676	-1.397361431
M13138	6B	77458408	0.098351214	0.175257732	99	0.270800424	0.293154155	0.000247116	1.248088366
M10320	5A	561660450	0.098362415	0.402061856	99	0.270800424	0.293152644	0.000691129	1.521730949
M4437	2B	658484745	0.098546418	0.309278351	99	0.270800424	0.293127848	0.000358377	-1.02771805
M8369	3D	115212017	0.098720379	0.350515464	99	0.270800424	0.293104452	0.000405906	-1.028887712
M4107	2B	277093048	0.09872277	0.381443299	99	0.270800424	0.293104131	0.001019429	2.374580716
M6313	3A	69503671	0.098777774	0.030927835	99	0.270800424	0.293096743	8.15339E-05	2.343636693
M5494	2D	79085779	0.098783457	0.051546392	99	0.270800424	0.29309598	0.000101574	1.751908497
M12906	6A	614446534	0.098802032	0.206185567	99	0.270800424	0.293093487	0.00024381	-1.051480882
M5425	2D	12765246	0.099112771	0.360824742	99	0.270800424	0.293051848	0.001107569	2.738083591
M3058	2A	729494667	0.099130156	0.288659794	99	0.270800424	0.293049522	0.000333974	-1.032226948
M5865	2D	601604653	0.099216779	0.360824742	99	0.270800424	0.293037943	0.00049229	1.218295184
M9965	5A	380823807	0.099326408	0.175257732	99	0.270800424	0.293023304	0.000256279	1.307202958
M45	1A	267772590	0.099406701	0.298969072	99	0.270800424	0.293012594	0.00054546	-1.632280416
M897	1B	32775858	0.099407386	0.340206186	99	0.270800424	0.293012503	0.000359898	-0.946451835
M13842	6B	0	0.099476906	0.422680412	99	0.270800424	0.293003238	0.000459099	-0.972432026
M7702	3B	675030662	0.09948282	0.082474227	99	0.270800424	0.29300245	0.000184698	-2.005089141
M3074	2A	735763589	0.099533429	0.24742268	99	0.270800424	0.29299571	0.000373281	-1.351473084
M8027	3B	775092204	0.09953595	0.381443299	99	0.270800424	0.292995374	0.000907685	-2.131706554
M8047	3B	12179959	0.09953595	0.381443299	99	0.270800424	0.292995374	0.000907685	2.131706554
M11199	5B	416173952	0.099560556	0.391752577	99	0.270800424	0.292992099	0.000599241	1.370627832
M4557	2B	51589506	0.099587999	0.319587629	99	0.270800424	0.292988447	0.000425004	1.191934914
M14794	7A	627011118	0.09969402	0.381443299	99	0.270800424	0.292974348	0.000529902	1.246456057
M1589	1B	573008421	0.099711199	0.432989691	99	0.270800424	0.292972065	0.00061256	1.269573144
M8058	3B	0	0.099793234	0.051546392	99	0.270800424	0.29296117	0.000128682	2.242149876
M10383	5A	114761753	0.099804696	0.484536082	99	0.270800424	0.292959648	0.00082178	-1.523431752
M6771	3A	0	0.099820005	0.154639175	99	0.270800424	0.292957616	0.000235146	-1.366089288
M995	1B	344338837	0.099822819	0.319587629	99	0.270800424	0.292957243	0.000472161	-1.327310484
M12682	6A	271010546	0.099869688	0.18556701	99	0.270800424	0.292951024	0.000314244	-1.522096679
M10014	5A	329278691	0.099919994	0.206185567	99	0.270800424	0.292944354	0.000221083	-0.964253851
M11374	5B	620654423	0.100003246	0.309278351	99	0.270800424	0.292933322	0.000617193	1.796089297
M11289	5B	635677372	0.100005546	0.195876289	99	0.270800424	0.292933018	0.000214692	0.986509141
M6865	3A	739951852	0.100093548	0.020618557	99	0.270800424	0.292921368	7.61264E-05	-3.326025624
M13862	6D	1585297	0.100229063	0.391752577	99	0.270800424	0.292903451	0.000423436	0.975017446
M2591	2A	74974888	0.100239027	0.422680412	99	0.270800424	0.292902135	0.000513215	-1.095384095
M11454	5B	651409879	0.100240035	0.134020619	99	0.270800424	0.292902002	0.000189626	-1.27646759
M8746	4A	478288955	0.100263856	0.391752577	99	0.270800424	0.292898855	0.00058435	-1.346009855
M6812	3A	600135047	0.100299933	0.113402062	99	0.270800424	0.292894092	0.000193928	-1.543698039
M6800	3A	729897788	0.100443762	0.443298969	99	0.270800424	0.29287512	0.000771731	1.573746999
M7475	3B	304279362	0.100452975	0.319587629	99	0.270800424	0.292873906	0.000642319	1.817045432
M11082	5B	529496598	0.100481091	0.329896907	99	0.270800424	0.292870201	0.000581523	-1.594099694
M14483	7A	49927360	0.100505549	0.432989691	99	0.270800424	0.292866979	0.000711578	-1.486543262
M5805	2D	0	0.100658282	0.484536082	99	0.270800424	0.29284688	0.000588897	1.101044762
M13559	6B	593285120	0.100660294	0.309278351	99	0.270800424	0.292846615	0.000385998	-1.130671276
M15323	7B	337120635	0.100727609	0.319587629	99	0.270800424	0.292837767	0.000389313	-1.104331585
M657	1A	583529682	0.100751818	0.371134021	99	0.270800424	0.292834587	0.000872406	-2.131490681
M2259	1D	471927480	0.100818215	0.474226804	99	0.270800424	0.292825869	0.000493678	0.944580572
M4436	2B	620850327	0.100871413	0.463917526	99	0.270800424	0.292818888	0.000570865	1.117128757
M11132	5B	328983718	0.100902958	0.432989691	99	0.270800424	0.292814751	0.000547072	-1.147395289
M120	1A	21638580	0.100946229	0.278350515	99	0.270800424	0.292809078	0.000326177	-1.064619251
M8800	4A	602863944	0.10099251	0.030927835	99	0.270800424	0.292803013	8.92909E-05	-2.624154375
M5670	2D	0	0.101057076	0.18556701	99	0.270800424	0.292794558	0.000247548	-1.213300201
M906	1B	210395910	0.1010822	0.422680412	99	0.270800424	0.292791269	0.000492789	-1.060634299
M12024	5D	257171245	0.101096323	0.402061856	99	0.270800424	0.292789421	0.000606079	1.371558185
M7948	3B	761498146	0.1011219	0.371134021	99	0.270800424	0.292786075	0.000907443	-2.225236979
M1316	1B	184220516	0.101129013	0.422680412	99	0.270800424	0.292785144	0.000709305	-1.527351689
M928	1B	198637739	0.10113178	0.020618557	99	0.270800424	0.292784782	6.55679E-05	2.894433005
M4438	2B	658484745	0.101182598	0.422680412	99	0.270800424	0.292778137	0.00052753	1.136537191
M13436	6B	126997677	0.101277726	0.257731959	99	0.270800424	0.292765707	0.000406528	1.437732572
M1308	1B	578521082	0.101407298	0.12371134	99	0.270800424	0.292748797	0.000248567	1.833774597
M7708	3B	673279285	0.101490422	0.06185567	99	0.270800424	0.292737962	0.00015213	2.246478667
M10	1A	0	0.101634484	0.154639175	99	0.270800424	0.292719207	0.000207992	-1.230298054
M4822	2B	730646221	0.101736765	0.257731959	99	0.270800424	0.292705909	0.000496713	-1.764645556
M3851	2B	92221173	0.10174032	0.402061856	99	0.270800424	0.292705447	0.000921954	-2.099674962
M5999	2D	37152237	0.101774879	0.484536082	99	0.270800424	0.292700957	0.000708159	-1.338712992
M450	1A	532773229	0.101864033	0.175257732	99	0.270800424	0.292689383	0.000236032	1.234689945
M6614	3A	681466014	0.101873884	0.051546392	99	0.270800424	0.292688105	0.000103965	1.849235518
M10625	5B	29125387	0.101891151	0.144329897	99	0.270800424	0.292685865	0.000244431	-1.553028236
M10373	5A	567502345	0.102015248	0.494845361	99	0.270800424	0.292669777	0.000925332	-1.716862444
M5585	2D	459879715	0.102037277	0.432989691	99	0.270800424	0.292666924	0.000481073	1.02031596
M5493	2D	79085779	0.102181909	0.340206186	99	0.270800424	0.292648206	0.000749908	-2.027132981
M9134	4A	236257089	0.102363051	0.216494845	99	0.270800424	0.292624806	0.000221545	-0.942758515
M1381	1B	458326189	0.102470824	0.463917526	99	0.270800424	0.292610905	0.000523839	1.04135685
M14999	7A	722383511	0.10247483	0.463917526	99	0.270800424	0.292610388	0.000934841	-1.858474508
M7336	3B	65705367	0.102497099	0.113402062	99	0.270800424	0.292607518	0.00021381	1.739250058
M12686	6A	555108932	0.10252575	0.206185567	99	0.270800424	0.292603826	0.000316979	-1.418559832
M13290	6B	230607608	0.102546357	0.288659794	99	0.270800424	0.292601172	0.000387938	-1.240335699
M11773	5B	685508081	0.102569332	0.092783505	99	0.270800424	0.292598213	0.000124012	-1.233818949
M4983	2B	763473937	0.102602967	0.298969072	99	0.270800424	0.292593883	0.000501911	-1.550252665
M11151	5B	519254488	0.102677509	0.144329897	99	0.270800424	0.292584291	0.000221936	-1.420984361
M10181	5A	591916968	0.102800575	0.432989691	99	0.270800424	0.292568473	0.000818539	1.749040849
M898	1B	32775858	0.102816773	0.463917526	99	0.270800424	0.292566393	0.000501297	-0.999910741
M6018	3A	717909949	0.102895016	0.432989691	99	0.270800424	0.292556349	0.000506526	1.083331113
M208	1A	327958495	0.103233926	0.268041237	99	0.270800424	0.292512941	0.000312269	-1.082409554
M8176	3B	818773933	0.103266396	0.494845361	99	0.270800424	0.29250879	0.000853461	-1.602934851
M6645	3A	695611858	0.103297245	0.329896907	99	0.270800424	0.292504848	0.000587378	1.655277213
M5842	2D	579196310	0.103354681	0.329896907	99	0.270800424	0.292497512	0.000359101	-1.012536557
M3798	2B	262262279	0.103449303	0.391752577	99	0.270800424	0.292485437	0.000450474	1.070600674
M9153	4A	708632121	0.10348383	0.226804124	99	0.270800424	0.292481034	0.000276068	1.1336543
M1464	1B	557465111	0.103533455	0.237113402	99	0.270800424	0.292474708	0.000266401	1.046894646
M2973	2A	541992663	0.103597055	0.463917526	99	0.270800424	0.292466606	0.000510165	-1.025321671
M4376	2B	309304504	0.103696085	0.474226804	99	0.270800424	0.292454001	0.000865128	1.70254729
M12530	6A	453550733	0.103727948	0.463917526	99	0.270800424	0.292449948	0.000698925	1.40646166
M12342	6A	558043959	0.103844175	0.278350515	99	0.270800424	0.292435177	0.000413292	1.387682012
M4186	2B	704118285	0.103862314	0.412371134	99	0.270800424	0.292432873	0.000614395	-1.392707155
M13177	6B	0	0.103884412	0.443298969	99	0.270800424	0.292430067	0.000516012	-1.088319358
M8666	4A	125344732	0.103918541	0.329896907	99	0.270800424	0.292425735	0.000863105	2.446925211
M13520	6B	643863993	0.104054311	0.24742268	99	0.270800424	0.292408517	0.000292123	-1.105679344
M8768	4A	597058372	0.104106757	0.195876289	99	0.270800424	0.292401873	0.000237156	-1.134421181
M792	1B	179842147	0.104108967	0.494845361	99	0.270800424	0.292401593	0.00063475	-1.201887831
M9969	5A	174799515	0.104113399	0.072164948	99	0.270800424	0.292401031	0.000113603	-1.475076077
M9956	5A	52357838	0.104149601	0.474226804	99	0.270800424	0.292396447	0.00067093	1.326145283
M13076	6B	40061097	0.104170386	0.484536082	99	0.270800424	0.292393816	0.000697297	1.349205984
M8675	4A	232125986	0.104344269	0.360824742	99	0.270800424	0.292371828	0.000618145	-1.608812578
M3690	2B	69047995	0.104480991	0.494845361	99	0.270800424	0.292354568	0.000560058	1.064248342
M2871	2A	557403153	0.10452976	0.020618557	99	0.270800424	0.292348418	7.56755E-05	3.452864847
M3289	2A	761319429	0.10458065	0.422680412	99	0.270800424	0.292342003	0.000733323	-1.632966631
M9737	4D	681466316	0.104624326	0.402061856	99	0.270800424	0.2923365	0.000604314	1.415287975
M8856	4A	483683726	0.104676408	0.474226804	99	0.270800424	0.292329942	0.000478473	0.950523586
M9110	4A	142667251	0.104701433	0.030927835	99	0.270800424	0.292326792	9.18715E-05	2.799152665
M2225	1D	514943395	0.104952872	0.412371134	99	0.270800424	0.292295189	0.000549402	-1.258457155
M10409	5A	690860803	0.105122505	0.484536082	99	0.270800424	0.292273916	0.000618691	-1.208052199
M6775	3A	0	0.105137314	0.381443299	99	0.270800424	0.292272061	0.000538832	-1.336665464
M11994	5D	548685020	0.105213562	0.453608247	99	0.270800424	0.292262513	0.000462251	-0.964963786
M13374	6B	159138986	0.105256912	0.237113402	99	0.270800424	0.292257087	0.00039359	-1.572464108
M8946	4A	91210964	0.105331928	0.484536082	99	0.270800424	0.292247705	0.000436424	-0.853856682
M8724	4A	36222671	0.105366496	0.06185567	99	0.270800424	0.292243385	9.10114E-05	1.395280091
M6391	3A	363608529	0.105367564	0.432989691	99	0.270800424	0.292243251	0.000637001	-1.395121528
M15163	7B	1747393	0.105392311	0.175257732	99	0.270800424	0.292240159	0.000223917	-1.211882602
M11127	5B	515039938	0.105440823	0.298969072	99	0.270800424	0.2922341	0.000312428	-0.991689262
M9425	4A	1736032	0.1054598	0.206185567	99	0.270800424	0.29223173	0.00023766	-1.094022889
M13359	6B	205236003	0.105480519	0.288659794	99	0.270800424	0.292229144	0.000398472	-1.3104668
M13352	6B	188000081	0.105534591	0.216494845	99	0.270800424	0.292222396	0.000313629	1.375960958
M5789	2D	595557034	0.105794819	0.134020619	99	0.270800424	0.292189978	0.000189048	-1.343094858
M1600	1B	536709124	0.105833903	0.329896907	99	0.270800424	0.292185116	0.000398059	-1.149308876
M13066	6B	31488518	0.105857939	0.144329897	99	0.270800424	0.292182127	0.000197475	1.303534528
M15414	7B	309802071	0.105895539	0.041237113	99	0.270800424	0.292177454	9.20226E-05	-2.126798261
M3628	2B	419250140	0.106032271	0.278350515	99	0.270800424	0.292160474	0.000344732	1.181869827
M14602	7A	102061623	0.106054823	0.144329897	99	0.270800424	0.292157675	0.000195463	-1.292649734
M3972	2B	128269909	0.106061579	0.443298969	99	0.270800424	0.292156837	0.000458224	-0.986691828
M12533	6A	623438271	0.106062751	0.453608247	99	0.270800424	0.292156692	0.000805132	1.694303877
M8151	3B	818871534	0.106105306	0.340206186	99	0.270800424	0.292151413	0.001524288	-4.278627909
M3220	2A	0	0.106105306	0.340206186	99	0.270800424	0.292151413	0.001524288	4.278627909
M4507	2B	690747730	0.106414508	0.474226804	99	0.270800424	0.292113134	0.00060289	1.21757362
M15014	7A	704330351	0.106512873	0.113402062	99	0.270800424	0.292100982	0.000188974	-1.597444724
M15161	7B	673044	0.10660642	0.144329897	99	0.270800424	0.292089437	0.00018611	-1.237200174
M7926	3B	552736382	0.106636261	0.072164948	99	0.270800424	0.292085757	0.000134342	1.786619096
M884	1B	8281654	0.106696839	0.350515464	99	0.270800424	0.292078289	0.000407729	1.117014051
M5320	2B	799056714	0.10671837	0.06185567	99	0.270800424	0.292075636	0.000185424	-2.879174879
M5935	2D	747238713	0.10673919	0.041237113	99	0.270800424	0.292073071	0.000106364	-2.477847548
M8191	3B	0	0.106796373	0.474226804	99	0.270800424	0.292066029	0.000695805	-1.410263853
M1804	1B	655311824	0.106848405	0.319587629	99	0.270800424	0.292059626	0.00027481	-0.826899741
M6095	3A	140700735	0.106872143	0.402061856	99	0.270800424	0.292056705	0.000514761	1.231457945
M1741	1B	502110575	0.106922856	0.391752577	99	0.270800424	0.292050469	0.000429948	-1.056129241
M13353	6B	267503580	0.106952962	0.144329897	99	0.270800424	0.292046768	0.000239888	-1.599881244
M8466	3D	553331262	0.107236939	0.298969072	99	0.270800424	0.292011916	0.000304156	-0.981876
M12460	6A	98753506	0.10761508	0.402061856	99	0.270800424	0.291965668	0.000873149	2.103348849
M12443	6A	67125239	0.10761508	0.402061856	99	0.270800424	0.291965668	0.000873149	-2.103348849
M12451	6A	98982876	0.10761508	0.402061856	99	0.270800424	0.291965668	0.000873149	-2.103348849
M12462	6A	106663978	0.10761508	0.402061856	99	0.270800424	0.291965668	0.000873149	-2.103348849
M12495	6A	317631893	0.10761508	0.402061856	99	0.270800424	0.291965668	0.000873149	-2.103348849
M13272	6B	106985833	0.107615463	0.020618557	99	0.270800424	0.291965622	6.66171E-05	3.129280233
M1121	1B	39854453	0.107783663	0.309278351	99	0.270800424	0.291945108	0.000443156	-1.389961519
M12891	6A	614663924	0.107813472	0.18556701	99	0.270800424	0.291941477	0.000276593	-1.446290814
M6768	3A	489299704	0.107816166	0.092783505	99	0.270800424	0.291941149	0.000159721	-1.670392738
M3273	2A	769032955	0.107967062	0.391752577	99	0.270800424	0.291922782	0.000470859	-1.167919701
M14475	7A	49592914	0.108014448	0.154639175	99	0.270800424	0.29191702	0.0002228	-1.40062128
M7433	3B	199675977	0.108048459	0.494845361	99	0.270800424	0.291912887	0.000480334	0.943918746
M2331	2A	441309055	0.108079059	0.443298969	99	0.270800424	0.291909169	0.000762282	-1.672642459
M14342	7A	0	0.10811406	0.371134021	99	0.270800424	0.291904918	0.001089846	-2.857320511
M10240	5A	534107889	0.10811406	0.371134021	99	0.270800424	0.291904918	0.001089846	2.857320511
M14939	7A	83447347	0.10811406	0.371134021	99	0.270800424	0.291904918	0.001089846	2.857320511
M6476	3A	595935042	0.108186945	0.082474227	99	0.270800424	0.29189607	0.000133502	1.576107272
M6495	3A	625237502	0.108186945	0.082474227	99	0.270800424	0.29189607	0.000133502	1.576107272
M683	1A	6675887	0.108196431	0.402061856	99	0.270800424	0.291894919	0.000521665	1.263437975
M939	1B	171130928	0.108201182	0.226804124	99	0.270800424	0.291894343	0.000297092	1.275600814
M7883	3B	749763064	0.10829236	0.340206186	99	0.270800424	0.291883286	0.000464179	1.329792397
M4182	2B	154255733	0.108315646	0.350515464	99	0.270800424	0.291880463	0.000334935	-0.931509689
M7081	3B	0	0.108423854	0.412371134	99	0.270800424	0.291867358	0.000415786	-0.983896264
M10283	5A	434929138	0.108622411	0.453608247	99	0.270800424	0.291843347	0.000726348	-1.565401585
M12084	6A	0	0.108714348	0.474226804	99	0.270800424	0.291832246	0.000481963	-0.994390362
M10300	5A	4247107	0.108771282	0.154639175	99	0.270800424	0.291825377	0.000258553	-1.636766431
M8951	4A	669909362	0.108790139	0.422680412	99	0.270800424	0.291823103	0.000450619	-1.043828438
M300	1A	387369246	0.108834352	0.474226804	99	0.270800424	0.291817772	0.000671295	-1.386551001
M5097	2B	0	0.108999404	0.206185567	99	0.270800424	0.291797894	0.000214126	1.018774048
M8379	3D	75963605	0.109003487	0.309278351	99	0.270800424	0.291797402	0.000308295	-0.9779134
M13991	6D	122978486	0.109007535	0.422680412	99	0.270800424	0.291796915	0.000513425	-1.191692353
M2650	2A	598418775	0.109034862	0.175257732	99	0.270800424	0.291793628	0.000321502	-1.800175382
M4347	2B	144566918	0.109063016	0.216494845	99	0.270800424	0.291790241	0.000345595	-1.566895147
M13859	6D	1373301	0.109311822	0.319587629	99	0.270800424	0.291760359	0.000314911	-0.969410119
M10746	5B	355233851	0.10932861	0.288659794	99	0.270800424	0.291758345	0.000369999	1.261219997
M13494	6B	205902023	0.109394354	0.082474227	99	0.270800424	0.291750463	0.000139611	1.666624664
M7989	3B	572633902	0.109589925	0.443298969	99	0.270800424	0.291727047	0.000384773	-0.856093641
M4160	2B	154633225	0.109619368	0.371134021	99	0.270800424	0.291723526	0.000373714	-0.993431671
M3126	2A	751096174	0.109836382	0.030927835	99	0.270800424	0.291697605	6.89925E-05	-2.20516379
M1083	1B	0	0.109886524	0.319587629	99	0.270800424	0.291691624	0.0004844	1.498999043
M6261	3A	34520561	0.10990346	0.216494845	99	0.270800424	0.291689605	0.000257305	-1.175587705
M11503	5B	142781109	0.109920624	0.237113402	99	0.270800424	0.291687558	0.000294311	-1.227923701
M11969	5D	703088649	0.109973557	0.340206186	99	0.270800424	0.29168125	0.000444278	-1.29253735
M1569	1B	592833254	0.110024457	0.278350515	99	0.270800424	0.291675187	0.000279426	0.994046156
M106	1A	16914186	0.110129891	0.350515464	99	0.270800424	0.291662638	0.000340886	0.963940459
M15114	7A	623342327	0.11019336	0.381443299	99	0.270800424	0.291655091	0.000845455	-2.198156532
M10354	5A	513747652	0.11021155	0.18556701	99	0.270800424	0.291652928	0.000283639	1.516125237
M12956	6B	8781678	0.110244315	0.051546392	99	0.270800424	0.291649035	0.00013546	2.60742505
M12430	6A	104566919	0.110248399	0.319587629	99	0.270800424	0.291648549	0.000396499	-1.231023797
M11125	5B	698122265	0.110297876	0.144329897	99	0.270800424	0.291642672	0.000196946	1.354567595
M12415	6A	60075194	0.110307177	0.412371134	99	0.270800424	0.291641568	0.000829438	1.996832773
M12121	6A	0	0.110356707	0.391752577	99	0.270800424	0.291635688	0.000516937	1.310589859
M1778	1B	642986028	0.110449236	0.12371134	99	0.270800424	0.291624712	0.000149125	1.198249884
M4886	2B	337709850	0.110501826	0.309278351	99	0.270800424	0.291618477	0.0005638	1.812958007
M6106	3A	283594306	0.110591331	0.237113402	99	0.270800424	0.291607875	0.000270061	-1.133625544
M7283	3B	48788274	0.11062646	0.237113402	99	0.270800424	0.291603716	0.0003134	1.315964299
M11438	5B	422432511	0.110719339	0.309278351	99	0.270800424	0.291592728	0.000324183	1.044495672
M12578	6A	522199017	0.110783053	0.474226804	99	0.270800424	0.291585197	0.000555173	1.167234724
M14822	7A	642899306	0.110875517	0.226804124	99	0.270800424	0.291574275	0.000237102	1.043189695
M2022	1D	0	0.111186694	0.402061856	99	0.270800424	0.291537594	0.000429205	1.0682362
M6319	3A	434822187	0.111265423	0.216494845	99	0.270800424	0.291528332	0.000272009	-1.258168376
M7295	3B	67787098	0.111345782	0.432989691	99	0.270800424	0.291518885	0.000575149	-1.331125724
M6630	3A	736712221	0.111416895	0.268041237	99	0.270800424	0.291510532	0.000346774	1.297293694
M10425	5A	585454698	0.11150452	0.226804124	99	0.270800424	0.291500248	0.000189352	0.837825209
M8075	3B	590943948	0.111518778	0.391752577	99	0.270800424	0.291498575	0.00046559	1.192839819
M927	1B	198637739	0.111531343	0.216494845	99	0.270800424	0.291497101	0.000339617	-1.574639244
M9473	4B	189530997	0.111555953	0.051546392	99	0.270800424	0.291494215	0.000112163	2.184666888
M9644	4B	200006364	0.111656426	0.216494845	99	0.270800424	0.29148244	0.00028398	-1.318154558
M15270	7B	97381806	0.111662845	0.422680412	99	0.270800424	0.291481688	0.00046816	-1.113097172
M4508	2B	690747730	0.111681329	0.340206186	99	0.270800424	0.291479523	0.000350634	-1.035941579
M9598	4B	581078619	0.111726439	0.175257732	99	0.270800424	0.291474241	0.000248823	1.427618256
M6348	3A	478681812	0.111786684	0.381443299	99	0.270800424	0.291467191	0.000384693	-1.01465256
M5339	2B	22348080	0.111881255	0.288659794	99	0.270800424	0.291456133	0.000413781	-1.443392667
M6531	3A	640751875	0.111925169	0.175257732	99	0.270800424	0.291451001	0.00023534	1.352661644
M1918	1B	679383844	0.111957326	0.298969072	99	0.270800424	0.291447245	0.000760765	-2.564007879
M283	1A	403145168	0.111957326	0.298969072	99	0.270800424	0.291447245	0.000760765	-2.564007879
M6009	2D	761851219	0.111957326	0.298969072	99	0.270800424	0.291447245	0.000760765	2.564007879
M8050	3B	12179959	0.112057849	0.041237113	99	0.270800424	0.291435511	9.25781E-05	-2.264147799
M8001	3B	0	0.112057849	0.041237113	99	0.270800424	0.291435511	9.25781E-05	2.264147799
M8014	3B	513332084	0.112057849	0.041237113	99	0.270800424	0.291435511	9.25781E-05	2.264147799
M8583	4A	716765921	0.112111724	0.309278351	99	0.270800424	0.291429227	0.000462625	-1.509291215
M13441	6B	151681483	0.11215214	0.422680412	99	0.270800424	0.291424515	0.000614375	1.467140527
M6015	2D	247051054	0.112195503	0.453608247	99	0.270800424	0.291419462	0.000577153	-1.284778046
M5841	2D	579196310	0.112240893	0.298969072	99	0.270800424	0.291414175	0.000280182	0.946689275
M14312	7A	455466428	0.112272388	0.340206186	99	0.270800424	0.291410508	0.000481571	1.430320527
M2975	2A	573863390	0.112293408	0.474226804	99	0.270800424	0.291408061	0.000584642	-1.245949867
M212	1A	293607657	0.112324501	0.360824742	99	0.270800424	0.291404442	0.000398963	1.117772586
M10581	5B	21538502	0.112396342	0.257731959	99	0.270800424	0.291396086	0.000277247	1.088161411
M8004	3B	0	0.112420572	0.051546392	99	0.270800424	0.291393269	0.000103602	2.033561475
M14466	7A	115267867	0.112421953	0.463917526	99	0.270800424	0.291393108	0.000663249	-1.446536152
M7317	3B	44728934	0.112451674	0.360824742	99	0.270800424	0.291389654	0.000929615	-2.607444881
M10400	5A	581488583	0.112534339	0.206185567	99	0.270800424	0.291380051	0.000299771	1.472514148
M13238	6B	159138920	0.112734104	0.319587629	99	0.270800424	0.291356877	0.000335669	-1.065661458
M4154	2B	183207936	0.1127811	0.216494845	99	0.270800424	0.291351432	0.000230242	-1.079482349
M15172	7B	66548049	0.112806153	0.360824742	99	0.270800424	0.291348531	0.000368637	-1.03723814
M5263	2B	800780319	0.112814484	0.268041237	99	0.270800424	0.291347566	0.000342862	1.298747277
M1801	1B	653681729	0.112957825	0.154639175	99	0.270800424	0.291330979	0.000173821	-1.142723925
M3590	2B	38132859	0.113036472	0.257731959	99	0.270800424	0.291321889	0.000239587	-0.945706157
M14541	7A	64739187	0.113091197	0.072164948	99	0.270800424	0.291315568	0.000108155	1.525421625
M9794	4D	403180673	0.113092087	0.278350515	99	0.270800424	0.291315465	0.000328178	1.20003127
M14749	7A	626447683	0.113178409	0.443298969	99	0.270800424	0.291305501	0.000574879	-1.32094721
M7190	3B	692937796	0.11324617	0.072164948	99	0.270800424	0.291297685	0.000122827	1.734743165
M9225	4A	729895722	0.113589572	0.432989691	99	0.270800424	0.291258158	0.000411961	-0.972656063
M5371	2D	13599129	0.113604162	0.268041237	99	0.270800424	0.291256481	0.000308196	1.17560509
M1028	1B	206100463	0.113626641	0.103092784	99	0.270800424	0.291253899	0.000133074	1.320038777
M7932	3B	750783796	0.113643643	0.474226804	99	0.270800424	0.291251946	0.000558542	-1.204640007
M10145	5A	485469964	0.113826465	0.474226804	99	0.270800424	0.291230968	0.000418159	0.90331807
M8948	4A	91210964	0.113857504	0.268041237	99	0.270800424	0.29122741	0.000243382	-0.9304462
M12088	6A	70744154	0.113865011	0.494845361	99	0.270800424	0.291226549	0.000470125	0.973591303
M10009	5A	461913319	0.113878949	0.12371134	99	0.270800424	0.291224952	0.000137887	1.142350081
M8593	4A	444907045	0.11390597	0.432989691	99	0.270800424	0.291221856	0.000712497	-1.686920769
M7461	3B	282944591	0.113934949	0.237113402	99	0.270800424	0.291218537	0.000249364	-1.078393709
M8845	4A	618529609	0.113977541	0.298969072	99	0.270800424	0.291213661	0.000518817	1.780121252
M4803	2B	127668612	0.113983274	0.18556701	99	0.270800424	0.291213004	0.000185931	-1.027860951
M6528	3A	639700048	0.113998728	0.268041237	99	0.270800424	0.291211235	0.00032813	1.255991573
M9507	4B	449269878	0.114033611	0.329896907	99	0.270800424	0.291207244	0.000411327	1.279628536
M231	1A	261892580	0.114209319	0.412371134	99	0.270800424	0.291187158	0.00043289	-1.079028754
M6102	3A	18171651	0.114320223	0.24742268	99	0.270800424	0.291174498	0.000252801	-1.051247338
M10522	5A	691820950	0.114531784	0.237113402	99	0.270800424	0.291150387	0.000264156	-1.148345378
M7486	3B	495521725	0.114624169	0.329896907	99	0.270800424	0.291139873	0.000867194	-2.711792955
M5819	2D	606705458	0.114646777	0.391752577	99	0.270800424	0.291137302	0.000352581	0.928647566
M8841	4A	441981603	0.114655458	0.134020619	99	0.270800424	0.291136314	0.000160005	-1.231967546
M15189	7B	89311430	0.114685285	0.360824742	99	0.270800424	0.291132923	0.000930539	-2.661880857
M9274	4A	720885307	0.114754138	0.443298969	99	0.270800424	0.291125098	0.000454264	1.058332496
M11734	5B	0	0.114762407	0.319587629	99	0.270800424	0.291124159	0.000556975	-1.800064384
M4784	2B	733180507	0.114866076	0.412371134	99	0.270800424	0.291112389	0.000550749	1.380701902
M15503	7B	605954397	0.11487331	0.453608247	99	0.270800424	0.291111568	0.000393432	0.896705691
M11892	5D	16120485	0.114895268	0.391752577	99	0.270800424	0.291109076	0.000863061	2.278107141
M4720	2B	717090293	0.114895268	0.391752577	99	0.270800424	0.291109076	0.000863061	2.278107141
M4769	2B	733890211	0.114895268	0.391752577	99	0.270800424	0.291109076	0.000863061	-2.278107141
M2221	1D	487977014	0.114921905	0.268041237	99	0.270800424	0.291106055	0.000286871	-1.106955602
M9810	4D	497938965	0.114985889	0.340206186	99	0.270800424	0.2910988	0.000289939	-0.881964645
M8838	4A	530834960	0.115069387	0.082474227	99	0.270800424	0.291089339	0.000109285	-1.372289222
M3450	2B	646343478	0.115095636	0.06185567	99	0.270800424	0.291086367	0.000143793	2.40801222
M10590	5B	576692587	0.115155604	0.360824742	99	0.270800424	0.291079579	0.000462579	-1.328671209
M11149	5B	421995258	0.115195695	0.18556701	99	0.270800424	0.291075043	0.000230702	1.288927476
M10610	5B	0	0.115323668	0.154639175	99	0.270800424	0.291060576	0.000261573	-1.755637782
M3591	2B	33729356	0.115382958	0.443298969	99	0.270800424	0.291053879	0.00072419	1.696444645
M7742	3B	689167710	0.115455355	0.113402062	99	0.270800424	0.291045708	0.000156349	1.43261683
M5855	2D	593510796	0.11559105	0.278350515	99	0.270800424	0.291030407	0.000255616	0.955349782
M15437	7B	567730502	0.115621316	0.412371134	99	0.270800424	0.291026997	0.000439775	-1.109744027
M6189	3A	425085428	0.115751024	0.226804124	99	0.270800424	0.291012394	0.000275828	1.266935923
M6773	3A	58591208	0.115797131	0.340206186	99	0.270800424	0.291007208	0.000376447	-1.15319404
M1249	1B	452770206	0.115849816	0.422680412	99	0.270800424	0.291001285	0.000546455	1.347968894
M3131	2A	192381627	0.115929608	0.381443299	99	0.270800424	0.290992319	0.000592053	1.619449983
M1697	1B	614393199	0.115973961	0.154639175	99	0.270800424	0.290987339	0.000191315	-1.291315273
M12022	5D	704165878	0.115986571	0.474226804	99	0.270800424	0.290985923	0.000638798	-1.406136462
M3107	2A	740354177	0.116035775	0.237113402	99	0.270800424	0.290980401	0.00027389	1.206296772
M12772	6A	714489935	0.116113374	0.494845361	99	0.270800424	0.290971698	0.000595984	1.258606719
M12057	6A	7901769	0.116182609	0.432989691	99	0.270800424	0.290963938	0.000564892	1.364178427
M8923	4A	50074687	0.116197434	0.360824742	99	0.270800424	0.290962277	0.000858894	-2.489329868
M7478	3B	311762515	0.116221462	0.432989691	99	0.270800424	0.290959586	0.000562388	1.358586678
M1077	1B	484923519	0.11623144	0.340206186	99	0.270800424	0.290958468	0.000433922	1.334244672
M14325	7A	19549420	0.116281975	0.381443299	99	0.270800424	0.29095281	0.000670986	1.840934659
M13269	6B	0	0.116304184	0.391752577	99	0.270800424	0.290950325	0.000490457	1.310470646
M13254	6B	134284790	0.116304184	0.391752577	99	0.270800424	0.290950325	0.000490457	-1.310470646
M8082	3B	793011311	0.11630439	0.340206186	99	0.270800424	0.290950302	0.000592668	-1.823510168
M8887	4A	34990198	0.116315016	0.463917526	99	0.270800424	0.290949113	0.000508422	-1.147260257
M1200	1B	0	0.116365998	0.072164948	99	0.270800424	0.290943409	9.31669E-05	-1.352084784
M5448	2D	58726855	0.116369598	0.371134021	99	0.270800424	0.290943007	0.0006513	1.83794559
M5499	2D	74936166	0.116373175	0.371134021	99	0.270800424	0.290942607	0.00033073	-0.933337333
M11796	5B	625779199	0.116531567	0.164948454	99	0.270800424	0.290924906	0.000218107	1.386779353
M370	1A	502682654	0.116559093	0.041237113	99	0.270800424	0.290921833	7.57957E-05	1.928169294
M11309	5B	4902436	0.11668165	0.226804124	99	0.270800424	0.290908159	0.000236236	1.093803805
M2953	2A	689761057	0.11671237	0.226804124	99	0.270800424	0.290904735	0.000195218	-0.904124492
M1202	1B	489902408	0.116796482	0.164948454	99	0.270800424	0.290895362	0.000187101	1.19234155
M5780	2D	586846415	0.11682076	0.412371134	99	0.270800424	0.290892659	0.000402524	1.026280762
M11266	5B	41324451	0.116829316	0.06185567	99	0.270800424	0.290891706	0.000120508	2.048483568
M2095	1D	366012746	0.116860207	0.237113402	99	0.270800424	0.290888267	0.000374485	1.661067729
M5798	2D	732592410	0.11691203	0.195876289	99	0.270800424	0.2908825	0.000272674	-1.46474903
M13418	6B	574666443	0.11692996	0.257731959	99	0.270800424	0.290880505	0.000314204	-1.282954879
M3481	2B	12913977	0.117047321	0.443298969	99	0.270800424	0.290867457	0.000551726	1.31108518
M13781	6B	719901771	0.117052218	0.340206186	99	0.270800424	0.290866913	0.000311025	0.96310824
M2611	2A	0	0.117108618	0.412371134	99	0.270800424	0.290860649	0.000351698	0.898902423
M6847	3A	738194828	0.117130962	0.422680412	99	0.270800424	0.290858168	0.0006677	-1.665265482
M11939	5D	581361090	0.117256106	0.329896907	99	0.270800424	0.290844282	0.000807844	2.584206681
M13953	6D	95594839	0.117332777	0.010309278	99	0.270800424	0.290835783	4.15739E-05	4.258476526
M2952	2A	691845663	0.117332777	0.010309278	99	0.270800424	0.290835783	4.15739E-05	4.258476526
M9795	4D	481893268	0.117400734	0.12371134	99	0.270800424	0.290828255	0.000136266	-1.163833192
M7026	3B	15100130	0.117460018	0.474226804	99	0.270800424	0.290821692	0.000388367	-0.865743023
M12143	6A	6562899	0.117589847	0.175257732	99	0.270800424	0.290807332	0.000219122	1.323189363
M13237	6B	159138920	0.117615479	0.474226804	99	0.270800424	0.290804499	0.000636764	-1.421344011
M4439	2B	658617299	0.117668439	0.360824742	99	0.270800424	0.290798648	0.000318081	0.933562306
M5853	2D	722804527	0.117928433	0.350515464	99	0.270800424	0.290769966	0.000391234	-1.184651633
M3297	2A	31477695	0.118001602	0.257731959	99	0.270800424	0.290761907	0.000208042	0.857260818
M13504	6B	634330557	0.118046664	0.103092784	99	0.270800424	0.290756947	0.000146877	-1.513637977
M6116	3A	15451588	0.118072994	0.494845361	99	0.270800424	0.290754049	0.000403264	-0.865989852
M10080	5A	467370058	0.118266282	0.443298969	99	0.270800424	0.290732801	0.000654221	1.570836422
M661	1A	6070342	0.118371289	0.206185567	99	0.270800424	0.290721274	0.000226832	-1.172022354
M6442	3A	516733247	0.118428203	0.134020619	99	0.270800424	0.290715032	0.0001278	-1.016378787
M14314	7A	18681090	0.118499371	0.371134021	99	0.270800424	0.29070723	0.000515808	1.482232287
M7725	3B	42311437	0.118612882	0.350515464	99	0.270800424	0.290694798	0.000384388	1.170677604
M12761	6A	595578856	0.11865214	0.494845361	99	0.270800424	0.290690501	0.000598235	1.290982678
M11649	5B	600731527	0.118766586	0.020618557	99	0.270800424	0.290677984	6.55729E-05	3.399406792
M11668	5B	495035120	0.118766586	0.020618557	99	0.270800424	0.290677984	6.55729E-05	3.399406792
M13661	6B	703823041	0.118838085	0.474226804	99	0.270800424	0.290670172	0.000546204	-1.2318758
M12132	6A	5480626	0.118914211	0.237113402	99	0.270800424	0.290661859	0.000289904	-1.308504075
M331	1A	474702375	0.118916169	0.319587629	99	0.270800424	0.290661645	0.001017261	3.406638509
M5848	2D	609493943	0.119029319	0.360824742	99	0.270800424	0.290649301	0.000387642	1.150882558
M14147	7A	274815	0.119029962	0.24742268	99	0.270800424	0.290649231	0.000321792	-1.393267271
M2520	2A	34350090	0.11903884	0.484536082	99	0.270800424	0.290648263	0.000390363	0.863125226
M1505	1B	57318239	0.119062994	0.443298969	99	0.270800424	0.29064563	0.000637382	-1.540714777
M944	1B	63461211	0.119077454	0.402061856	99	0.270800424	0.290644054	0.000464091	1.237037082
M2219	1D	438024561	0.119098716	0.206185567	99	0.270800424	0.290641737	0.000255933	1.330507732
M14193	7A	13842196	0.119113255	0.195876289	99	0.270800424	0.290640153	0.000254547	1.393122567
M10435	5A	591433518	0.119337789	0.134020619	99	0.270800424	0.290615715	0.000190556	-1.527116432
M1865	1B	408423217	0.11941188	0.422680412	99	0.270800424	0.290607663	0.000356162	-0.905576312
M13947	6D	94997910	0.119518681	0.329896907	99	0.270800424	0.290596066	0.00037389	-1.219112047
M3772	2B	600752746	0.119561129	0.329896907	99	0.270800424	0.290591459	0.000408906	1.333758682
M12464	6A	171029382	0.119612933	0.072164948	99	0.270800424	0.29058584	0.000135654	2.023605156
M12452	6A	98982876	0.119612933	0.072164948	99	0.270800424	0.29058584	0.000135654	-2.023605156
M12504	6A	16791756	0.119612933	0.072164948	99	0.270800424	0.29058584	0.000135654	-2.023605156
M13943	6D	24404067	0.119619501	0.422680412	99	0.270800424	0.290585128	0.000673205	-1.714667404
M12093	6A	3600330	0.119707527	0.453608247	99	0.270800424	0.290575587	0.00035689	0.847651681
M1698	1B	614393199	0.119828556	0.453608247	99	0.270800424	0.290562482	0.000572756	-1.36173109
M1364	1B	509798209	0.119847489	0.298969072	99	0.270800424	0.290560433	0.000320187	-1.15517655
M4059	2B	155155728	0.119915755	0.484536082	99	0.270800424	0.290553049	0.000545029	1.213982707
M10171	5A	496135708	0.119927699	0.103092784	99	0.270800424	0.290551758	0.000121954	-1.276815961
M6845	3A	329077007	0.12003956	0.463917526	99	0.270800424	0.29053967	0.000459801	-1.070769664
M8851	4A	111059555	0.120096825	0.298969072	99	0.270800424	0.290533487	0.000309095	-1.117479312
M5042	2B	749345224	0.120110681	0.494845361	99	0.270800424	0.290531991	0.000448747	-0.980293896
M12034	5D	561671414	0.120196852	0.443298969	99	0.270800424	0.290522694	0.000437499	1.067619345
M4410	2B	124973674	0.120243638	0.298969072	99	0.270800424	0.290517649	0.000375455	-1.359054149
M8822	4A	132119668	0.120445364	0.206185567	99	0.270800424	0.290495924	0.000217161	1.141713359
M10588	5B	576692587	0.12054335	0.06185567	99	0.270800424	0.290485386	0.00011481	2.013662371
M1040	1B	186525506	0.120736659	0.412371134	99	0.270800424	0.290464624	0.0007648	2.015306776
M3895	2B	118063648	0.120876359	0.206185567	99	0.270800424	0.290449643	0.000183975	0.970697368
M10551	5B	713387538	0.120923986	0.484536082	99	0.270800424	0.290444541	0.000777086	-1.74541108
M4928	2B	619961495	0.121002636	0.381443299	99	0.270800424	0.290436119	0.00031011	-0.885367103
M12399	6A	38379225	0.121012328	0.350515464	99	0.270800424	0.290435082	0.000438093	1.361228549
M8119	3B	705837468	0.121024866	0.030927835	99	0.270800424	0.29043374	6.29527E-05	2.217083736
M9503	4B	558148549	0.121040341	0.371134021	99	0.270800424	0.290432084	0.000831769	2.441431354
M10550	5B	17888082	0.121142013	0.432989691	99	0.270800424	0.29042121	0.000472061	1.188659712
M13626	6B	687021610	0.121163414	0.391752577	99	0.270800424	0.290418922	0.000325778	0.906825461
M11765	5B	682372033	0.121263395	0.453608247	99	0.270800424	0.290408241	0.000805258	-1.937431084
M12261	6A	319197077	0.121347842	0.216494845	99	0.270800424	0.290399227	0.000182655	0.921423433
M2034	1D	21146599	0.121595465	0.381443299	99	0.270800424	0.290372837	0.000391874	1.124286082
M3979	2B	218209754	0.121643166	0.340206186	99	0.270800424	0.290367761	0.000739227	2.378844774
M6839	3A	600926479	0.12170232	0.381443299	99	0.270800424	0.290361468	0.000446696	-1.282696098
M7030	3B	579518208	0.121707388	0.257731959	99	0.270800424	0.290360929	0.000250004	1.062523355
M7195	3B	0	0.121750349	0.206185567	99	0.270800424	0.290356361	0.000226164	1.201926298
M2016	1D	13713162	0.121792613	0.391752577	99	0.270800424	0.29035187	0.000397247	-1.111506864
M7688	3B	0	0.121887723	0.371134021	99	0.270800424	0.290341768	0.000491759	-1.453529082
M10043	5A	451877771	0.121909459	0.350515464	99	0.270800424	0.290339461	0.000306916	0.960708791
M2861	2A	562636225	0.121973591	0.453608247	99	0.270800424	0.290332655	0.00042066	-1.018025454
M8060	3B	781113311	0.121991925	0.072164948	99	0.270800424	0.290330711	0.000113522	1.727138034
M12311	6A	23587868	0.122040507	0.443298969	99	0.270800424	0.290325559	0.000470497	1.165752727
M6083	3A	15780588	0.12219659	0.092783505	99	0.270800424	0.290309024	0.000129904	1.539761833
M2040	1D	711983266	0.122211329	0.484536082	99	0.270800424	0.290307464	0.001085317	2.463681883
M11883	5D	6459997	0.122269695	0.041237113	99	0.270800424	0.290301287	8.06256E-05	2.151523818
M10146	5A	485469964	0.122437004	0.360824742	99	0.270800424	0.290283601	0.000291876	-0.891367387
M11693	5B	0	0.122495122	0.432989691	99	0.270800424	0.290277464	0.000651556	-1.658957225
M8895	4A	635530599	0.122554251	0.412371134	99	0.270800424	0.290271223	0.000359308	0.961056783
M562	1A	570134003	0.122603773	0.24742268	99	0.270800424	0.290265999	0.000201962	0.900690737
M5408	2D	20432790	0.122670392	0.113402062	99	0.270800424	0.290258975	0.00013339	1.298631469
M6621	3A	547633295	0.122672982	0.350515464	99	0.270800424	0.290258702	0.000467055	1.471135238
M14224	7A	507351841	0.122694996	0.329896907	99	0.270800424	0.290256382	0.000308265	1.031847876
M7161	3B	28279863	0.12289515	0.030927835	99	0.270800424	0.290235309	7.14024E-05	2.55352798
M7315	3B	55092506	0.12289515	0.030927835	99	0.270800424	0.290235309	7.14024E-05	2.55352798
M761	1B	25945971	0.122916363	0.443298969	99	0.270800424	0.290233078	0.00036405	-0.908481643
M1753	1B	636316329	0.123051419	0.051546392	99	0.270800424	0.290218884	8.68083E-05	-1.865056448
M12986	6B	1328375	0.123073352	0.340206186	99	0.270800424	0.290216581	0.000299463	0.975005757
M7281	3B	48788274	0.123102206	0.340206186	99	0.270800424	0.290213551	0.000363577	1.18402828
M4314	2B	456976627	0.123109518	0.051546392	99	0.270800424	0.290212783	7.73859E-05	1.66340413
M12418	6A	49110792	0.123145656	0.298969072	99	0.270800424	0.29020899	0.000351266	-1.302181285
M5950	2D	774840471	0.123164933	0.020618557	99	0.270800424	0.290206967	5.25834E-05	-2.826959439
M8755	4A	46952980	0.123297882	0.020618557	99	0.270800424	0.290193026	5.78902E-05	3.115620739
M3386	2A	588436341	0.123301887	0.340206186	99	0.270800424	0.290192606	0.000274942	0.896833439
M6406	3A	541482839	0.123329975	0.360824742	99	0.270800424	0.290189663	0.00043519	-1.338731709
M8611	4A	110875760	0.123556904	0.443298969	99	0.270800424	0.290165913	0.000370895	0.930388022
M6005	2D	642133932	0.123589353	0.350515464	99	0.270800424	0.290162521	0.000398747	-1.265359458
M2176	1D	0	0.123763627	0.24742268	99	0.270800424	0.290144321	0.000347316	1.563581827
M1796	1B	647195583	0.123792382	0.463917526	99	0.270800424	0.29014132	0.000524645	1.259973814
M15501	7B	0	0.123862434	0.443298969	99	0.270800424	0.290134014	0.000368721	-0.927220301
M11047	5B	94028326	0.123912463	0.463917526	99	0.270800424	0.2901288	0.000543887	-1.307450267
M8223	3B	829535069	0.124073273	0.340206186	99	0.270800424	0.290112054	0.000358276	1.175970298
M14764	7A	545581545	0.124141605	0.030927835	99	0.270800424	0.290104945	7.05823E-05	2.549798598
M11909	5D	154782380	0.124384592	0.18556701	99	0.270800424	0.290079703	0.000161815	-0.97617644
M5910	2D	615707186	0.124449474	0.144329897	99	0.270800424	0.290072973	0.000176569	-1.370227202
M13357	6B	113852468	0.124474474	0.463917526	99	0.270800424	0.29007038	0.000624275	-1.507503019
M12555	6A	39131835	0.124495966	0.371134021	99	0.270800424	0.290068152	0.000361484	-1.091329926
M974	1B	0	0.124555403	0.278350515	99	0.270800424	0.290061993	0.000313315	-1.261812297
M14382	7A	0	0.124600219	0.443298969	99	0.270800424	0.29005735	0.000435589	1.101897255
M4237	2B	693041722	0.124614424	0.453608247	99	0.270800424	0.290055879	0.000395495	0.977847299
M15060	7A	719575839	0.124622513	0.278350515	99	0.270800424	0.290055042	0.000303288	1.222085691
M2326	2A	3539454	0.124645607	0.319587629	99	0.270800424	0.290052651	0.000310703	-1.090622285
M4625	2B	599925082	0.124854342	0.453608247	99	0.270800424	0.290031063	0.000571639	-1.416077589
M5239	2B	31519188	0.12486774	0.391752577	99	0.270800424	0.290029679	0.000943578	2.706815688
M5266	2B	31477695	0.12486774	0.391752577	99	0.270800424	0.290029679	0.000943578	2.706815688
M5326	2B	644096629	0.12486774	0.391752577	99	0.270800424	0.290029679	0.000943578	2.706815688
M5367	2D	14379312	0.12486774	0.391752577	99	0.270800424	0.290029679	0.000943578	-2.706815688
M2277	1D	486387816	0.124944519	0.371134021	99	0.270800424	0.290021749	0.000364097	-1.103177945
M912	1B	137436650	0.1250657	0.164948454	99	0.270800424	0.290009245	0.000186818	1.274827415
M4947	2B	760119516	0.12521943	0.391752577	99	0.270800424	0.289993402	0.000311041	0.894787683
M13527	6B	29569629	0.125272306	0.319587629	99	0.270800424	0.289987958	0.000699384	2.46730734
M11259	5B	635769576	0.125317792	0.051546392	99	0.270800424	0.289983276	8.29077E-05	-1.81406074
M7002	3B	17974227	0.125454166	0.463917526	99	0.270800424	0.289969253	0.000361229	-0.879164192
M13095	6B	347314097	0.125550579	0.432989691	99	0.270800424	0.289959349	0.000583905	1.523791802
M10405	5A	580934990	0.125590906	0.371134021	99	0.270800424	0.289955209	0.000799979	-2.436400564
M14900	7A	693025273	0.125590906	0.371134021	99	0.270800424	0.289955209	0.000799979	-2.436400564
M4510	2B	668683546	0.125642367	0.030927835	99	0.270800424	0.289949928	7.0342E-05	2.571840114
M14135	7A	4013265	0.125731864	0.422680412	99	0.270800424	0.28994075	0.000318139	0.851711734
M3331	2A	0	0.125778155	0.18556701	99	0.270800424	0.289936005	0.000157133	-0.958549684
M13224	6B	157131092	0.12582696	0.195876289	99	0.270800424	0.289931005	0.00017915	1.035742239
M13242	6B	216629004	0.125951554	0.391752577	99	0.270800424	0.289918251	0.000329144	-0.952401288
M4753	2B	600038125	0.125967108	0.474226804	99	0.270800424	0.28991666	0.000445697	1.065500289
M5817	2D	606164081	0.125982427	0.463917526	99	0.270800424	0.289915093	0.000566439	-1.38441028
M9152	4A	441240399	0.126045995	0.463917526	99	0.270800424	0.289908593	0.000604248	-1.477561895
M12040	6A	49592914	0.126093113	0.164948454	99	0.270800424	0.289903777	0.000192874	-1.326967906
M8914	4A	330012453	0.126120049	0.144329897	99	0.270800424	0.289901025	0.000161403	-1.269351462
M7535	3B	501653667	0.126158123	0.360824742	99	0.270800424	0.289897136	0.000663407	2.087572031
M6409	3A	397200871	0.126265226	0.092783505	99	0.270800424	0.289886204	0.00018869	-2.311022309
M9781	4D	446124259	0.12630671	0.340206186	99	0.270800424	0.289881972	0.000579831	-1.937439499
M7489	3B	169821972	0.126379141	0.051546392	99	0.270800424	0.289874588	8.66523E-05	-1.912052777
M164	1A	0	0.126493092	0.443298969	99	0.270800424	0.28986298	0.000327596	0.841301391
M14149	7A	455502	0.126610144	0.422680412	99	0.270800424	0.289851068	0.000528012	-1.423451846
M1770	1B	64478551	0.126621303	0.402061856	99	0.270800424	0.289849933	0.000348432	-0.987583736
[truncated: 13,601 more rows]
