# Supplementary material for: Genome-wide association study of drought tolerance and biomass allocation in wheat
Source: PLoS One. 2019 Dec 4;14(12):e0225383. doi: 10.1371/journal.pone.0225383 (PMC6892492; doi:10.1371/journal.pone.0225383)
Supplement: S5 Table — (CSV) [file pone.0225383.s005.csv]

SNP	Chromosome	Position	P.value	maf	nobs	Rsquare.of.Model.without.SNP	Rsquare.of.Model.with.SNP	FDR_Adjusted_P-values	effect
M788	1B	81660700	0.000310706	0.298969072	99	-0.031562053	0.127978177	0.02873787	1.936684713
M8624	4A	114487333	0.000346298	0.350515464	99	-0.031562053	0.125305848	0.027917723	1.823192301
M3855	2B	69509022	0.00049916	0.309278351	99	-0.031562053	0.116359431	0.048931137	2.038471146
M4951	2B	762073843	0.000748599	0.134020619	99	-0.031562053	0.106557485	0.049067746	-2.273436847
M1433	1B	529627736	0.000771615	0.103092784	99	-0.031562053	0.105830007	0.03191247	2.440184291
M14192	7A	13842196	0.000823391	0.360824742	99	-0.031562053	0.104272052	0.043536655	-4.842872899
M15414	7B	309802071	0.001101054	0.041237113	99	-0.031562053	0.097340289	0.036795307	-3.482076774
M15402	7B	511064939	0.00148725	0.360824742	99	-0.031562053	0.09023637	0.031946139	-3.764237329
M1634	1B	0	0.001585168	0.12371134	99	-0.031562053	0.088738849	0.024660049	2.100486047
M8185	3B	820905679	0.001661815	0.113402062	99	-0.031562053	0.087631895	0.026869024	2.51136814
M216	1A	288094235	0.002075878	0.030927835	99	-0.031562053	0.082440288	0.194921287	3.716990535
M12054	6A	172236575	0.002115935	0.319587629	99	-0.031562053	0.081996127	0.118732162	-1.491728753
M12122	6A	0	0.002136738	0.020618557	99	-0.031562053	0.081768868	0.232897103	-5.505874926
M13169	6B	85384559	0.002200645	0.340206186	99	-0.031562053	0.081084816	0.118215437	-1.478573774
M13066	6B	31488518	0.002292061	0.144329897	99	-0.031562053	0.080141215	0.140832755	1.903245283
M522	1A	549511398	0.002343433	0.453608247	99	-0.031562053	0.079627902	0.118082418	-1.473973639
M473	1A	544077560	0.002391571	0.463917526	99	-0.031562053	0.079157366	0.135224104	1.749398465
M12485	6A	317623793	0.002490938	0.329896907	99	-0.031562053	0.078216326	0.146503531	2.068112131
M314	1A	562808063	0.002645461	0.381443299	99	-0.031562053	0.07682754	0.136576269	1.788480178
M8923	4A	50074687	0.00266993	0.360824742	99	-0.031562053	0.076615353	0.188392483	-3.62578812
M8800	4A	602863944	0.002782161	0.030927835	99	-0.031562053	0.075667243	0.188926955	-3.645006682
M9428	4A	733792535	0.00293524	0.329896907	99	-0.031562053	0.074436044	0.136749718	1.795612487
M8766	4A	597058372	0.002938053	0.041237113	99	-0.031562053	0.074414048	0.179917833	3.162628605
M8781	4A	595433064	0.002938053	0.041237113	99	-0.031562053	0.074414048	0.179917833	3.162628605
M3990	2B	126899677	0.002997145	0.12371134	99	-0.031562053	0.073956931	0.146262572	2.065317075
M1471	1B	532773182	0.003231513	0.371134021	99	-0.031562053	0.072231585	0.200364705	3.942369926
M5094	2B	774088019	0.003295319	0.329896907	99	-0.031562053	0.071784292	0.133534908	-1.854941459
M5785	2D	598277265	0.003328791	0.360824742	99	-0.031562053	0.071553229	0.123104628	-1.587028174
M1431	1B	554018133	0.003393783	0.350515464	99	-0.031562053	0.07111137	0.227210695	5.091358628
M8582	4A	45140360	0.003393783	0.350515464	99	-0.031562053	0.07111137	0.227210695	5.091358628
M391	1A	0	0.003551712	0.443298969	99	-0.031562053	0.070073223	0.125509477	-1.645336092
M8889	4A	747299239	0.004030424	0.484536082	99	-0.031562053	0.067196524	0.13727803	1.817329225
M381	1A	504702998	0.004105308	0.443298969	99	-0.031562053	0.066778832	0.129211569	1.602784113
M8765	4A	597058372	0.004331218	0.381443299	99	-0.031562053	0.065565073	0.165762463	2.682154335
M15338	7B	382617987	0.004335793	0.360824742	99	-0.031562053	0.065541179	0.120096982	-1.507869682
M12306	6A	0	0.004341651	0.12371134	99	-0.031562053	0.065510618	0.133903402	1.727501481
M9150	4A	22270015	0.004424697	0.381443299	99	-0.031562053	0.065081942	0.181402224	3.225594759
M10753	5B	388587448	0.004634139	0.474226804	99	-0.031562053	0.064036883	0.13855324	-1.983736907
M11870	5B	612532049	0.004637946	0.412371134	99	-0.031562053	0.064018346	0.127224814	1.554596992
M13204	6B	65496487	0.004930202	0.041237113	99	-0.031562053	0.062640421	0.173827783	-3.08425023
M3586	2B	40530085	0.005087582	0.288659794	99	-0.031562053	0.061933151	0.121154796	1.405915298
M8315	3D	46582531	0.005170991	0.350515464	99	-0.031562053	0.061567472	0.129305331	1.610419381
M9308	4A	1131864	0.005182478	0.463917526	99	-0.031562053	0.061517593	0.117314842	1.314759631
M392	1A	0	0.00530389	0.453608247	99	-0.031562053	0.060997302	0.130092584	1.631410733
M6127	3A	19895266	0.00551886	0.288659794	99	-0.031562053	0.060105753	0.112716975	-1.330617388
M14468	7A	60679438	0.005549443	0.278350515	99	-0.031562053	0.059981857	0.148672714	2.150375729
M2501	2A	36404881	0.005605693	0.402061856	99	-0.031562053	0.059755823	0.150335741	2.20032768
M4783	2B	733180507	0.005671723	0.113402062	99	-0.031562053	0.059493476	0.131888974	-1.798963626
M10570	5B	13171598	0.005771929	0.24742268	99	-0.031562053	0.059101357	0.125642257	1.519496322
M12102	6A	11577996	0.005909211	0.432989691	99	-0.031562053	0.058575497	0.146853108	-2.215159022
M12032	5D	711579175	0.005945528	0.371134021	99	-0.031562053	0.058438509	0.155417373	2.357017483
M1391	1B	499899181	0.005960059	0.360824742	99	-0.031562053	0.058383942	0.12152687	-1.53526196
M14780	7A	614780849	0.006050722	0.319587629	99	-0.031562053	0.058046578	0.120007725	1.38213882
M8410	3D	380816249	0.006282526	0.06185567	99	-0.031562053	0.057207378	0.152523038	-2.383535101
M11995	5D	548844664	0.006439535	0.391752577	99	-0.031562053	0.056657071	0.112715997	-1.327146673
M10863	5B	422121027	0.006600592	0.309278351	99	-0.031562053	0.056106897	0.132125762	-1.801828598
M8955	4A	648906704	0.006797966	0.360824742	99	-0.031562053	0.05545142	0.179899759	3.180940927
M8770	4A	597058372	0.006797966	0.360824742	99	-0.031562053	0.05545142	0.17679054	-3.180940927
M5229	2B	645000730	0.006921939	0.06185567	99	-0.031562053	0.055049762	0.153117693	2.289453027
M6025	3A	7314381	0.006958007	0.309278351	99	-0.031562053	0.05493431	0.121287011	-1.525988221
M12418	6A	49110792	0.006966072	0.298969072	99	-0.031562053	0.054908582	0.127277118	-1.674855051
M12015	5D	0	0.006979322	0.072164948	99	-0.031562053	0.054866376	0.145103288	-2.160362785
M1083	1B	0	0.006995363	0.319587629	99	-0.031562053	0.054815393	0.154949809	2.346128947
M6005	2D	642133932	0.00703778	0.350515464	99	-0.031562053	0.054681166	0.127768702	-1.687165299
M8734	4A	0	0.007150233	0.412371134	99	-0.031562053	0.054329346	0.12311773	-1.570126892
M5127	2B	221893152	0.007178814	0.402061856	99	-0.031562053	0.054240845	0.137459494	1.835270414
M8812	4A	0	0.007240053	0.030927835	99	-0.031562053	0.054052452	0.176755377	-3.17829877
M8958	4A	661535725	0.007240053	0.030927835	99	-0.031562053	0.054052452	0.176755377	-3.17829877
M1548	1B	0	0.007443867	0.06185567	99	-0.031562053	0.05343719	0.145938278	-2.1832353
M105	1A	16914186	0.007542719	0.298969072	99	-0.031562053	0.053145076	0.108873416	-1.238487147
M833	1B	21523277	0.007621836	0.329896907	99	-0.031562053	0.052914143	0.163371543	2.616111959
M335	1A	426440396	0.007698662	0.329896907	99	-0.031562053	0.052692272	0.195054355	3.751927873
M10738	5B	43437349	0.007856663	0.051546392	99	-0.031562053	0.052243139	0.175209546	3.017595345
M8118	3B	800129404	0.007910156	0.020618557	99	-0.031562053	0.052093209	0.194732857	-3.844181763
M7053	3B	0	0.007945133	0.051546392	99	-0.031562053	0.051995748	0.155037422	2.351664466
M3644	2B	50713994	0.007952897	0.288659794	99	-0.031562053	0.051974175	0.1138765	-1.348759904
M9895	5A	82132019	0.00825457	0.412371134	99	-0.031562053	0.051152514	0.142801212	-2.090371138
M8205	3B	743193869	0.008351429	0.340206186	99	-0.031562053	0.050895331	0.125469318	1.523359654
M12430	6A	104566919	0.008787387	0.319587629	99	-0.031562053	0.049775027	0.121579579	-1.527934434
M6787	3A	519467461	0.008992752	0.06185567	99	-0.031562053	0.049267232	0.149872726	2.196916182
M3544	2B	28014544	0.009013872	0.309278351	99	-0.031562053	0.049215696	0.147290745	2.120240655
M4568	2B	545270114	0.009014501	0.226804124	99	-0.031562053	0.049214164	0.116964192	1.31884806
M11673	5B	631373208	0.009104032	0.371134021	99	-0.031562053	0.048997108	0.119258425	-1.471254301
M9400	4A	5381823	0.009110842	0.412371134	99	-0.031562053	0.048980687	0.111917146	1.203564069
M7952	3B	0	0.009245022	0.381443299	99	-0.031562053	0.048659772	0.118691662	1.36011128
M12491	6A	440255570	0.009618027	0.092783505	99	-0.031562053	0.047792586	0.142171804	-2.069074773
M8301	3D	18727134	0.009782577	0.360824742	99	-0.031562053	0.047421137	0.122155569	-1.53961943
M3519	2B	0	0.009850856	0.134020619	99	-0.031562053	0.047268917	0.125893126	-1.63217684
M10612	5B	316546278	0.009873739	0.474226804	99	-0.031562053	0.047218148	0.133380804	-1.826262048
M8090	3B	795540049	0.009927225	0.443298969	99	-0.031562053	0.047099963	0.136061167	1.804164156
M9054	4A	660462703	0.009977366	0.103092784	99	-0.031562053	0.04698977	0.136779633	-1.917856571
M6094	3A	13812131	0.010059913	0.422680412	99	-0.031562053	0.046809617	0.119475171	-1.474241271
M382	1A	504702998	0.010144239	0.06185567	99	-0.031562053	0.046627166	0.144191241	-2.125738565
M4474	2B	638230965	0.010241888	0.278350515	99	-0.031562053	0.04641786	0.119987955	1.393293086
M11228	5B	506961125	0.010347254	0.288659794	99	-0.031562053	0.046194341	0.120692714	1.41047879
M9757	4D	336833285	0.010354633	0.484536082	99	-0.031562053	0.046178777	0.123742996	-1.577411686
M1627	1B	144111278	0.010399404	0.432989691	99	-0.031562053	0.04608459	0.144001475	2.027557881
M8234	3B	823095734	0.010578274	0.360824742	99	-0.031562053	0.045712477	0.120989889	1.418142838
M1883	1B	480971976	0.0106022	0.443298969	99	-0.031562053	0.045663201	0.13776427	-1.943562611
M6079	3A	0	0.010624509	0.412371134	99	-0.031562053	0.045617362	0.145572188	2.073508831
M6417	3A	512556910	0.010659674	0.309278351	99	-0.031562053	0.045545309	0.190517119	-3.675222577
M4092	2B	445251666	0.010662572	0.237113402	99	-0.031562053	0.045539382	0.118674614	1.36282702
M8746	4A	478288955	0.010755605	0.391752577	99	-0.031562053	0.045350004	0.127522995	-1.67156144
M11591	5B	680236004	0.01084952	0.360824742	99	-0.031562053	0.045160558	0.115875746	1.297558287
M6093	3A	13812131	0.011018695	0.422680412	99	-0.031562053	0.044823587	0.118498861	1.359374415
M8308	3D	0	0.011255511	0.288659794	99	-0.031562053	0.044360863	0.111432599	-1.286083274
M13105	6B	42378167	0.011335358	0.288659794	99	-0.031562053	0.044207141	0.113601638	-1.334740346
M8362	3D	58370125	0.011428226	0.391752577	99	-0.031562053	0.044029767	0.107097776	-1.191023132
M77	1A	14189304	0.011468163	0.402061856	99	-0.031562053	0.043953951	0.157167403	-2.514113211
M3928	2B	180555363	0.011493077	0.103092784	99	-0.031562053	0.043906796	0.13347152	1.73755786
M14971	7A	621160098	0.011607975	0.072164948	99	-0.031562053	0.043690698	0.13881896	-1.970761069
M6115	3A	15451588	0.011621469	0.268041237	99	-0.031562053	0.043665466	0.116833027	-1.408661098
M5276	2B	792988297	0.011646544	0.164948454	99	-0.031562053	0.04361866	0.130246038	1.65278437
M5030	2B	770651253	0.011672642	0.195876289	99	-0.031562053	0.043570056	0.112826261	-1.316546581
M8846	4A	618529609	0.011864708	0.443298969	99	-0.031562053	0.043215822	0.114971692	-1.365064822
M11998	5D	553338175	0.011895584	0.360824742	99	-0.031562053	0.043159436	0.10575488	-1.161568892
M5125	2B	654784627	0.011907265	0.422680412	99	-0.031562053	0.043138145	0.139842361	-1.998726743
M402	1A	939984	0.01195914	0.484536082	99	-0.031562053	0.043043852	0.124890185	1.516711984
M10613	5B	25812761	0.012006933	0.175257732	99	-0.031562053	0.042957358	0.137724218	1.853838656
M591	1A	420194142	0.012098511	0.371134021	99	-0.031562053	0.042792623	0.106186338	-1.170346462
M8674	4A	232125986	0.012105228	0.340206186	99	-0.031562053	0.042780592	0.112366873	-1.305412013
M9416	4A	1535331	0.012442889	0.030927835	99	-0.031562053	0.04218462	0.214071651	-4.624851791
M7865	3B	736466529	0.012590391	0.092783505	99	-0.031562053	0.041929575	0.136455524	-1.90394059
M8822	4A	132119668	0.012646154	0.206185567	99	-0.031562053	0.041833968	0.119526018	1.386812921
M6154	3A	21223559	0.012651945	0.381443299	99	-0.031562053	0.041824065	0.133251088	1.733761192
M9734	4D	16502547	0.012665981	0.24742268	99	-0.031562053	0.041800081	0.140586479	-2.0182559
M12397	6A	610402426	0.012739829	0.298969072	99	-0.031562053	0.041674351	0.124700463	1.513346184
M4848	2B	611235852	0.01275108	0.18556701	99	-0.031562053	0.041655264	0.119008604	1.374649518
M4365	2B	135437600	0.012755016	0.072164948	99	-0.031562053	0.041648591	0.151261286	2.246349076
M499	1A	540414573	0.012986458	0.226804124	99	-0.031562053	0.041259921	0.11255317	-1.308081527
M6021	3A	8232937	0.012992357	0.360824742	99	-0.031562053	0.041250109	0.165350675	-2.775334698
M8863	4A	12656052	0.013009996	0.391752577	99	-0.031562053	0.041220799	0.144385191	-2.12592915
M8870	4A	542592144	0.013080473	0.371134021	99	-0.031562053	0.041104105	0.124156412	1.500377347
M12026	5D	629968953	0.013221583	0.051546392	99	-0.031562053	0.040872428	0.153377299	-2.393332018
M8323	3D	32335084	0.013261573	0.474226804	99	-0.031562053	0.040807242	0.106180863	-1.168244804
M6803	3A	695744712	0.013283223	0.051546392	99	-0.031562053	0.040772038	0.154266765	2.339051443
M8201	3B	825377413	0.013349404	0.340206186	99	-0.031562053	0.040664793	0.116249946	-1.392069782
M2259	1D	471927480	0.013393113	0.474226804	99	-0.031562053	0.040594269	0.107556725	1.11625064
M6023	3A	1286118	0.013461918	0.164948454	99	-0.031562053	0.040483741	0.129001295	1.623649677
M894	1B	178656968	0.013517328	0.443298969	99	-0.031562053	0.040395159	0.118489672	-1.444375392
M1655	1B	589090638	0.01354628	0.288659794	99	-0.031562053	0.040349027	0.14234526	1.98586829
M922	1B	0	0.013611114	0.18556701	99	-0.031562053	0.040246092	0.125841025	1.543350277
M10584	5B	0	0.013716743	0.463917526	99	-0.031562053	0.040079485	0.11691248	1.326773316
M9190	4A	711885159	0.013720531	0.154639175	99	-0.031562053	0.040073534	0.134919637	-1.860404371
M12903	6A	615775115	0.013758772	0.371134021	99	-0.031562053	0.040013566	0.102562538	-1.091920991
M8298	3D	18128457	0.013788151	0.340206186	99	-0.031562053	0.039967613	0.117103539	-1.41129149
M4010	2B	131147922	0.013955601	0.350515464	99	-0.031562053	0.039707644	0.10870705	-1.221429906
M8607	4A	63826057	0.013965096	0.278350515	99	-0.031562053	0.039693	0.115670462	-1.377658576
M4539	2B	670299111	0.014021668	0.453608247	99	-0.031562053	0.039605971	0.131694915	1.694749086
M9275	4A	729115418	0.014095544	0.175257732	99	-0.031562053	0.039492875	0.116909026	-1.40626492
M3802	2B	456534362	0.014137351	0.206185567	99	-0.031562053	0.039429149	0.120993096	-1.503362079
M3871	2B	106962921	0.014143525	0.278350515	99	-0.031562053	0.039419755	0.124578991	1.512572734
M1954	1B	260327837	0.014170732	0.195876289	99	-0.031562053	0.039378408	0.114626036	1.274534406
M14496	7A	55362389	0.014240931	0.175257732	99	-0.031562053	0.039272107	0.118521268	1.365456994
M11459	5B	546498743	0.014438245	0.144329897	99	-0.031562053	0.038976242	0.131972281	-1.780644543
M13721	6B	462318879	0.014620997	0.484536082	99	-0.031562053	0.03870597	0.11490378	1.281581889
M3680	2B	38442340	0.01462795	0.082474227	99	-0.031562053	0.038695757	0.152449083	2.285376521
M11461	5B	0	0.014737809	0.288659794	99	-0.031562053	0.038535068	0.110461087	1.1816301
M4742	2B	730086784	0.014812564	0.195876289	99	-0.031562053	0.03842644	0.112402623	-1.301861399
M1374	1B	291083356	0.014940056	0.381443299	99	-0.031562053	0.038242502	0.125359439	1.533256398
M10320	5A	561660450	0.015008547	0.402061856	99	-0.031562053	0.038144365	0.133176748	1.735460248
M13838	6B	720519099	0.015048579	0.298969072	99	-0.031562053	0.038087224	0.152070129	2.274445191
M8759	4A	360831014	0.015058199	0.422680412	99	-0.031562053	0.038073515	0.136339711	1.820778172
M6403	3A	512326769	0.015083565	0.360824742	99	-0.031562053	0.038037414	0.166758809	-2.818887465
M11869	5B	612532049	0.015200785	0.154639175	99	-0.031562053	0.037871412	0.121053437	-1.503264883
M11702	5B	634081712	0.01530108	0.340206186	99	-0.031562053	0.03773044	0.102527221	-1.088913544
M9061	4A	4271248	0.015371037	0.206185567	99	-0.031562053	0.037632683	0.112770083	-1.309341849
M15317	7B	162339083	0.015596855	0.432989691	99	-0.031562053	0.037320287	0.141085905	-2.027843543
M6324	3A	238337704	0.015735273	0.371134021	99	-0.031562053	0.037131139	0.119796057	1.397978396
M7954	3B	761778756	0.015795466	0.381443299	99	-0.031562053	0.03704943	0.109861661	1.169909021
M8381	3D	149912090	0.015867474	0.484536082	99	-0.031562053	0.03695211	0.134808845	1.780390359
M15568	7B	672025248	0.015869522	0.154639175	99	-0.031562053	0.036949349	0.114169919	-1.340426394
M10510	5A	680512404	0.015875561	0.175257732	99	-0.031562053	0.036941209	0.125228213	-1.60515173
M8771	4A	5065562	0.015949177	0.381443299	99	-0.031562053	0.036842249	0.132518346	1.719268965
M74	1A	10127837	0.015950467	0.391752577	99	-0.031562053	0.036840518	0.113646239	1.254706246
M3910	2B	976743	0.016128435	0.494845361	99	-0.031562053	0.036603266	0.114395771	1.272035982
M3332	2A	0	0.016192248	0.432989691	99	-0.031562053	0.036518865	0.12620304	1.556201869
M618	1A	578933488	0.016345276	0.216494845	99	-0.031562053	0.036317881	0.115319023	1.293529824
M8620	4A	107154792	0.016538714	0.412371134	99	-0.031562053	0.036066633	0.124129546	1.504747783
M10843	5B	0	0.016571868	0.371134021	99	-0.031562053	0.036023881	0.161055496	2.557863387
M4316	2B	413346348	0.016577559	0.051546392	99	-0.031562053	0.036016551	0.145715036	-2.159303709
M15427	7B	539790379	0.01658415	0.360824742	99	-0.031562053	0.036008066	0.209461724	4.351413323
M15431	7B	556686638	0.01658415	0.360824742	99	-0.031562053	0.036008066	0.209461724	4.351413323
M2053	1D	41915193	0.01658415	0.360824742	99	-0.031562053	0.036008066	0.207735535	-4.351413323
M6011	2D	640948762	0.01658415	0.360824742	99	-0.031562053	0.036008066	0.207735535	-4.351413323
M798	1B	247051054	0.01658415	0.360824742	99	-0.031562053	0.036008066	0.207735535	-4.351413323
M872	1B	2431679	0.01658415	0.360824742	99	-0.031562053	0.036008066	0.207735535	-4.351413323
M2280	1D	484303414	0.016622287	0.340206186	99	-0.031562053	0.035959038	0.165035986	2.68772862
M8496	3D	596995100	0.01675635	0.257731959	99	-0.031562053	0.035787621	0.117356324	1.341463058
M4120	2B	437379831	0.016895379	0.206185567	99	-0.031562053	0.035611371	0.125449628	1.538149553
M12030	5D	561671357	0.016928283	0.06185567	99	-0.031562053	0.035569881	0.142866266	-2.076646891
M9306	4A	729822223	0.017217744	0.319587629	99	-0.031562053	0.035208498	0.112485635	1.230093315
M966	1B	50203925	0.017229803	0.134020619	99	-0.031562053	0.035193582	0.135007921	1.787520293
M3901	2B	104940598	0.017294385	0.206185567	99	-0.031562053	0.035113884	0.121436223	1.439561738
M4731	2B	712361439	0.017631338	0.432989691	99	-0.031562053	0.034703075	0.103551408	-1.106992487
M4654	2B	602009444	0.017634623	0.381443299	99	-0.031562053	0.03469911	0.110657921	-1.259216653
M9185	4A	712151623	0.017705269	0.371134021	99	-0.031562053	0.034614043	0.111789555	-1.284304497
M3282	2A	773395688	0.01778337	0.082474227	99	-0.031562053	0.034520415	0.132655093	-1.794257791
M8480	3D	577418701	0.017855643	0.494845361	99	-0.031562053	0.034434157	0.103978898	1.04672697
M10384	5A	114761753	0.018064025	0.18556701	99	-0.031562053	0.034187493	0.12450798	-1.584411212
M9738	4D	681466316	0.018143808	0.072164948	99	-0.031562053	0.034093845	0.133959335	-1.82860418
M3807	2B	157603272	0.018238423	0.268041237	99	-0.031562053	0.033983347	0.12166772	1.446320074
M4315	2B	413346348	0.018242423	0.371134021	99	-0.031562053	0.033978689	0.155995849	2.399491817
M14314	7A	18681090	0.01827076	0.371134021	99	-0.031562053	0.033945721	0.134097507	1.764268428
M3935	2B	508735111	0.018413442	0.288659794	99	-0.031562053	0.03378053	0.117923716	-1.424380801
M10189	5A	503430449	0.018466418	0.226804124	99	-0.031562053	0.033719539	0.113727949	-1.327124176
M9180	4A	709851704	0.018960451	0.474226804	99	-0.031562053	0.033159475	0.135090413	-1.858101432
M9196	4A	135164375	0.018960451	0.474226804	99	-0.031562053	0.033159475	0.135090413	-1.858101432
M14486	7A	13379407	0.01899298	0.350515464	99	-0.031562053	0.033123139	0.18379353	3.344883019
M4421	2B	619000495	0.019062452	0.391752577	99	-0.031562053	0.033045755	0.115230486	-1.360852248
M143	1A	20237352	0.019099561	0.134020619	99	-0.031562053	0.033004542	0.124093009	-1.572912035
M6264	3A	387080506	0.019129493	0.18556701	99	-0.031562053	0.032971361	0.117220837	1.341101113
M8499	3D	613900663	0.019183988	0.484536082	99	-0.031562053	0.032911089	0.132179252	-1.780046558
M2953	2A	689761057	0.019204618	0.226804124	99	-0.031562053	0.032888319	0.105353313	-1.142820377
M144	1A	20237352	0.01927148	0.474226804	99	-0.031562053	0.032814701	0.119120924	-1.451794146
M10525	5A	698225850	0.019326531	0.134020619	99	-0.031562053	0.032754287	0.130124228	1.660477178
M8439	3D	524197814	0.019379128	0.474226804	99	-0.031562053	0.032696737	0.127312624	1.588153676
M5655	2D	142549111	0.019447258	0.340206186	99	-0.031562053	0.032622432	0.122493913	1.467853445
M2255	1D	470523363	0.019477138	0.319587629	99	-0.031562053	0.032589932	0.148366154	2.168661641
M1333	1B	470907649	0.019535144	0.360824742	99	-0.031562053	0.032526988	0.133771761	-1.822015398
M10917	5B	455741036	0.01954847	0.278350515	99	-0.031562053	0.032512555	0.135656223	1.807748532
M9162	4A	708083352	0.019549973	0.113402062	99	-0.031562053	0.032510928	0.131884007	-1.771850061
M3384	2A	585501135	0.019632955	0.268041237	99	-0.031562053	0.032421294	0.101580651	-1.064284166
M7931	3B	750783796	0.019800638	0.113402062	99	-0.031562053	0.032241381	0.123961881	1.504413417
M10359	5A	567120979	0.019960688	0.164948454	99	-0.031562053	0.03207115	0.12850969	1.619402894
M4737	2B	682744936	0.020138145	0.216494845	99	-0.031562053	0.031884076	0.110958654	1.199298214
M12034	5D	561671414	0.020161448	0.443298969	99	-0.031562053	0.031859639	0.112090001	1.224557195
M2066	1D	26257862	0.020364278	0.443298969	99	-0.031562053	0.031648191	0.132432463	1.722187526
M9142	4A	708078692	0.020416304	0.268041237	99	-0.031562053	0.031594312	0.123252164	1.487515283
M1625	1B	614701448	0.020442279	0.391752577	99	-0.031562053	0.031567465	0.154712888	2.3620403
M9397	4A	742001973	0.020446812	0.402061856	99	-0.031562053	0.031562785	0.121083519	1.434559082
M3325	2A	761319429	0.020457889	0.402061856	99	-0.031562053	0.03155135	0.121578183	-1.509676817
M691	1A	491632757	0.020581112	0.391752577	99	-0.031562053	0.031424584	0.113999286	1.268159142
M9181	4A	708632155	0.020588848	0.134020619	99	-0.031562053	0.031416652	0.138920983	1.898487304
M9003	4A	297888928	0.020640015	0.350515464	99	-0.031562053	0.03136427	0.11821366	1.366082661
M6270	3A	52210548	0.020644855	0.463917526	99	-0.031562053	0.031359322	0.11433037	1.275784018
M485	1A	339729738	0.020680936	0.195876289	99	-0.031562053	0.031322475	0.132620103	1.727486688
M8587	4A	716765921	0.020729155	0.391752577	99	-0.031562053	0.031273339	0.127499345	-1.656881631
M5024	2B	23306994	0.020740083	0.24742268	99	-0.031562053	0.03126222	0.124407153	1.516451758
M10446	5A	591976445	0.020788299	0.24742268	99	-0.031562053	0.031213233	0.1095592	-1.231535072
M11114	5B	531194944	0.020906514	0.257731959	99	-0.031562053	0.031093635	0.106185262	-1.158624616
M4943	2B	751539866	0.02109331	0.381443299	99	-0.031562053	0.0309061	0.110694048	1.194411129
M8596	4A	392658355	0.021144178	0.226804124	99	-0.031562053	0.030855334	0.121212921	1.43840189
M685	1A	370054619	0.021194809	0.494845361	99	-0.031562053	0.030804932	0.126809006	1.57724746
M13171	6B	85384559	0.021305007	0.412371134	99	-0.031562053	0.030695671	0.10606182	1.094215287
M4248	2B	483838235	0.021323591	0.175257732	99	-0.031562053	0.030677303	0.114852693	1.288436812
M484	1A	540712899	0.02139471	0.494845361	99	-0.031562053	0.030607169	0.129380729	1.643330125
M12402	6A	28011074	0.021416015	0.257731959	99	-0.031562053	0.030586207	0.120624011	1.424429003
M7723	3B	108853172	0.021466894	0.12371134	99	-0.031562053	0.030536236	0.115423972	-1.362805569
M892	1B	12505139	0.021468568	0.319587629	99	-0.031562053	0.030534593	0.16243175	-2.668941932
M8614	4A	475428443	0.021523721	0.391752577	99	-0.031562053	0.03048057	0.123270138	1.489072134
M2516	2A	261223513	0.021696443	0.237113402	99	-0.031562053	0.030312324	0.122101502	-1.521190014
M713	1B	104669566	0.021804252	0.463917526	99	-0.031562053	0.030208024	0.1231201	1.485647872
M15285	7B	115401524	0.021805806	0.144329897	99	-0.031562053	0.030206524	0.122840658	1.478776192
M2123	1D	433032816	0.021841253	0.237113402	99	-0.031562053	0.030172352	0.129279013	-1.701478681
M3340	2A	766578300	0.021846885	0.06185567	99	-0.031562053	0.030166929	0.133974198	-1.825075494
M8284	3D	7272771	0.021872297	0.371134021	99	-0.031562053	0.030142473	0.150031493	-2.281087349
M15600	7B	0	0.021945428	0.06185567	99	-0.031562053	0.030072262	0.141665785	-2.03699172
M2043	1D	33589188	0.02195579	0.319587629	99	-0.031562053	0.030062334	0.148881917	2.186520179
M811	1B	0	0.02230916	0.443298969	99	-0.031562053	0.029726683	0.115740773	1.309865966
M2610	2A	699092314	0.022455415	0.082474227	99	-0.031562053	0.0295894	0.128949364	1.633204449
M7935	3B	758346322	0.022498785	0.24742268	99	-0.031562053	0.029548872	0.111752407	-1.278408924
M8123	3B	322735845	0.022541084	0.381443299	99	-0.031562053	0.029509424	0.161865811	2.590544637
M2795	2A	185345167	0.022564287	0.164948454	99	-0.031562053	0.029487819	0.110651589	-1.253865227
M13677	6B	705232815	0.022587625	0.041237113	99	-0.031562053	0.029466111	0.153562284	2.328671386
M806	1B	2784530	0.022663315	0.072164948	99	-0.031562053	0.02939587	0.140853078	-2.013354827
M3114	2A	747610057	0.022813198	0.24742268	99	-0.031562053	0.029257506	0.108365349	1.145047382
M8660	4A	321099074	0.022943107	0.082474227	99	-0.031562053	0.029138355	0.126970447	-1.641287789
M757	1B	2358221	0.023030521	0.371134021	99	-0.031562053	0.02905858	0.163842515	-2.71349556
M643	1A	543072796	0.023162961	0.484536082	99	-0.031562053	0.028938321	0.113472383	1.258659844
M195	1A	49346956	0.023206042	0.340206186	99	-0.031562053	0.028899359	0.121038346	1.436128761
M7970	3B	95564668	0.023288708	0.453608247	99	-0.031562053	0.02882481	0.10450127	1.063226724
M504	1A	451630421	0.023413408	0.494845361	99	-0.031562053	0.028712882	0.121474141	-1.504309571
M12396	6A	33007883	0.023590658	0.360824742	99	-0.031562053	0.028554864	0.116177037	-1.378265261
M9267	4A	729819205	0.023595949	0.216494845	99	-0.031562053	0.028550166	0.11312869	1.251259878
M846	1B	17621853	0.023615505	0.268041237	99	-0.031562053	0.028532813	0.106400865	-1.160647229
M11901	5D	175947785	0.023764391	0.134020619	99	-0.031562053	0.028401194	0.133563877	1.755529731
M10540	5B	1440674	0.02378613	0.494845361	99	-0.031562053	0.028382049	0.120575014	1.425451342
M12555	6A	39131835	0.024023518	0.371134021	99	-0.031562053	0.028174184	0.109343194	-1.223767602
M3591	2B	33729356	0.024043467	0.443298969	99	-0.031562053	0.028156815	0.13529662	1.802360715
M1928	1B	0	0.024125258	0.329896907	99	-0.031562053	0.028085761	0.150687896	-2.29876997
M5257	2B	765373126	0.024179813	0.092783505	99	-0.031562053	0.028038508	0.131359136	1.697483757
M10323	5A	164201064	0.024204547	0.381443299	99	-0.031562053	0.028017123	0.116360085	-1.381984067
M10461	5A	614408666	0.024545963	0.391752577	99	-0.031562053	0.027724258	0.108090176	1.140624348
M10434	5A	490330792	0.024568983	0.164948454	99	-0.031562053	0.027704667	0.11845147	-1.430779747
M8613	4A	475428443	0.024720765	0.226804124	99	-0.031562053	0.027575977	0.123932368	1.508347211
M10631	5B	685117897	0.024859337	0.041237113	99	-0.031562053	0.027459214	0.154268369	2.352413764
M8974	4A	681683099	0.024867602	0.24742268	99	-0.031562053	0.027452272	0.110224556	1.187492998
M727	1B	3164636	0.024874991	0.494845361	99	-0.031562053	0.027446067	0.122453506	1.47204004
M12395	6A	33007883	0.024911126	0.309278351	99	-0.031562053	0.027415753	0.115663255	-1.365214614
M1329	1B	505061911	0.024994985	0.298969072	99	-0.031562053	0.027345581	0.108834614	-1.211842896
M13162	6B	81973226	0.025039156	0.453608247	99	-0.031562053	0.027308718	0.099223436	-1.011837736
M107	1A	9592304	0.025076013	0.463917526	99	-0.031562053	0.027278013	0.119405408	1.398487133
M4837	2B	745683074	0.025256252	0.453608247	99	-0.031562053	0.02712854	0.119139248	1.392287493
M5118	2B	510095712	0.025300103	0.422680412	99	-0.031562053	0.027092344	0.133441076	-1.807744409
M3096	2A	610377425	0.025403606	0.360824742	99	-0.031562053	0.027007175	0.10057794	-1.038599368
M11182	5B	512799727	0.025510262	0.422680412	99	-0.031562053	0.026919793	0.122521761	-1.528077974
M14380	7A	0	0.025516764	0.494845361	99	-0.031562053	0.026914479	0.125254277	1.541948901
M9750	4D	95663405	0.025659827	0.092783505	99	-0.031562053	0.026797905	0.127802254	1.606543698
M8421	3D	374395136	0.025720703	0.484536082	99	-0.031562053	0.02674851	0.121584849	-1.505036064
M9578	4B	544593891	0.025763742	0.268041237	99	-0.031562053	0.026713662	0.117679542	1.358133798
M5520	2D	74929509	0.025883192	0.340206186	99	-0.031562053	0.026617267	0.103354509	-1.094832713
M15495	7B	607525751	0.02595007	0.350515464	99	-0.031562053	0.026563503	0.179028131	-3.231670672
M15510	7B	8867615	0.02595007	0.350515464	99	-0.031562053	0.026563503	0.180505794	3.231670672
M15523	7B	591698895	0.02595007	0.350515464	99	-0.031562053	0.026563503	0.180505794	3.231670672
M10451	5A	177507239	0.026018062	0.494845361	99	-0.031562053	0.026508994	0.120149422	-1.470097346
M10865	5B	128642164	0.026169785	0.082474227	99	-0.031562053	0.026387898	0.130285426	1.671041314
M4179	2B	75627521	0.026191886	0.360824742	99	-0.031562053	0.02637032	0.134056111	-1.823474422
M8524	3D	612028308	0.026240684	0.237113402	99	-0.031562053	0.026331565	0.116069758	-1.373550437
M8394	3D	250050869	0.026276364	0.463917526	99	-0.031562053	0.026303276	0.118622401	1.380824126
M4662	2B	692615324	0.026326875	0.298969072	99	-0.031562053	0.026263299	0.112650013	-1.295265845
M3078	2A	736308932	0.026359984	0.484536082	99	-0.031562053	0.026237137	0.10113807	-1.049128063
M12784	6A	471813125	0.026438316	0.144329897	99	-0.031562053	0.026175383	0.122435622	1.47287278
M14204	7A	13966199	0.026485386	0.226804124	99	-0.031562053	0.026138367	0.111868457	1.225316789
M8523	3D	612028308	0.026493199	0.453608247	99	-0.031562053	0.02613223	0.116450904	-1.382213544
M1654	1B	584320517	0.026500787	0.030927835	99	-0.031562053	0.026126271	0.173454769	2.98252941
M10519	5A	691737676	0.026570608	0.371134021	99	-0.031562053	0.026071526	0.110486207	1.194648673
M4071	2B	236583792	0.02659639	0.350515464	99	-0.031562053	0.026051349	0.10937075	1.170144751
M956	1B	630186255	0.026642606	0.175257732	99	-0.031562053	0.026015233	0.126110203	-1.616393576
M14428	7A	34221691	0.026655565	0.360824742	99	-0.031562053	0.026005119	0.163465745	2.646099868
M7862	3B	24460849	0.02665761	0.082474227	99	-0.031562053	0.026003523	0.131732849	-1.761357863
M8601	4A	93968043	0.026686929	0.350515464	99	-0.031562053	0.025980659	0.115950311	1.318466814
M9191	4A	705378018	0.026766434	0.164948454	99	-0.031562053	0.025918792	0.138251433	1.885427085
M14750	7A	626447683	0.026772431	0.360824742	99	-0.031562053	0.025914133	0.10179135	-1.062062018
M8200	3B	610544393	0.026784759	0.360824742	99	-0.031562053	0.02590456	0.112240721	-1.285702496
M860	1B	26832143	0.026794108	0.432989691	99	-0.031562053	0.025897303	0.100387418	-1.033660663
M913	1B	309086631	0.027113906	0.463917526	99	-0.031562053	0.025650672	0.117231679	-1.399977325
M13128	6B	76722170	0.027117193	0.329896907	99	-0.031562053	0.025648153	0.110890895	-1.255327219
M5935	2D	747238713	0.027122133	0.041237113	99	-0.031562053	0.025644368	0.153572067	-2.38408235
M928	1B	198637739	0.027139718	0.020618557	99	-0.031562053	0.025630901	0.176738014	3.098001644
M11936	5D	472425065	0.027239199	0.092783505	99	-0.031562053	0.025554883	0.130538267	-1.729578787
M4853	2B	748703470	0.02740619	0.329896907	99	-0.031562053	0.02542794	0.100334423	-1.032127589
M8890	4A	747299239	0.027427531	0.484536082	99	-0.031562053	0.025411776	0.107533328	-1.181753439
M8769	4A	597058372	0.027575819	0.12371134	99	-0.031562053	0.025299827	0.120705626	-1.482284635
M6718	3A	714450654	0.027813179	0.371134021	99	-0.031562053	0.025121954	0.110261239	-1.240876027
M11351	5B	531853859	0.027868206	0.350515464	99	-0.031562053	0.025080948	0.103751219	-1.101512487
M4229	2B	219214772	0.027913224	0.350515464	99	-0.031562053	0.025047464	0.175341436	-3.099509369
M3210	2A	778811091	0.028007719	0.206185567	99	-0.031562053	0.024977365	0.114228818	-1.32979964
M3754	2B	392096989	0.028276907	0.134020619	99	-0.031562053	0.024779041	0.119574024	-1.45457376
M4093	2B	290674909	0.028342361	0.494845361	99	-0.031562053	0.02473112	0.108266176	-1.1968876
M15158	7B	641779	0.028350782	0.010309278	99	-0.031562053	0.024724963	0.208604551	-4.37631084
M6326	3A	168438608	0.028350782	0.010309278	99	-0.031562053	0.024724963	0.208604551	-4.37631084
M11361	5B	180679040	0.028367343	0.298969072	99	-0.031562053	0.024712861	0.132641856	1.734673335
M1357	1B	7319459	0.028376753	0.164948454	99	-0.031562053	0.024705988	0.114838712	-1.343498968
M6057	3A	8862385	0.028425357	0.195876289	99	-0.031562053	0.024670524	0.108222551	-1.19588258
M8255	3D	7574572	0.028479687	0.371134021	99	-0.031562053	0.02463096	0.105495472	-1.137560425
M8318	3D	31446070	0.028514741	0.319587629	99	-0.031562053	0.024605475	0.102844306	-1.082300603
M2804	2A	109064436	0.02856961	0.288659794	99	-0.031562053	0.02456565	0.110946754	-1.255483876
M10755	5B	383209422	0.028741309	0.113402062	99	-0.031562053	0.024441552	0.149896292	2.222448287
M858	1B	36034202	0.028752374	0.288659794	99	-0.031562053	0.024433581	0.113984881	-1.323688896
M10383	5A	114761753	0.028762392	0.484536082	99	-0.031562053	0.024426368	0.118674241	-1.432783917
M12342	6A	558043959	0.028766979	0.278350515	99	-0.031562053	0.024423066	0.115838962	1.317443436
M6073	3A	13376403	0.028860378	0.412371134	99	-0.031562053	0.024355953	0.127570355	1.603063583
M13167	6B	89695899	0.02888554	0.463917526	99	-0.031562053	0.024337913	0.098694651	-0.998401335
M6558	3A	657422205	0.028895401	0.350515464	99	-0.031562053	0.024330847	0.175180668	3.044495781
M6273	3A	45708165	0.028895401	0.350515464	99	-0.031562053	0.024330847	0.173786217	-3.044495781
M617	1A	578933488	0.028916313	0.24742268	99	-0.031562053	0.024315871	0.126850654	-1.633424705
M14601	7A	102061623	0.028972027	0.350515464	99	-0.031562053	0.024276028	0.13522002	1.804169345
M15451	7B	583551258	0.028986003	0.051546392	99	-0.031562053	0.024266046	0.160394033	-2.596890623
M12003	5D	552729543	0.029015844	0.412371134	99	-0.031562053	0.024244751	0.094921453	-0.92525298
M8357	3D	48269637	0.029099269	0.484536082	99	-0.031562053	0.024185338	0.113642689	1.267280745
M389	1A	511633014	0.029143754	0.402061856	99	-0.031562053	0.024153732	0.106007884	1.099613411
M8331	3D	33388803	0.029205064	0.371134021	99	-0.031562053	0.024110255	0.103683563	1.050917878
M8823	4A	612096350	0.029221804	0.082474227	99	-0.031562053	0.024098401	0.128942402	-1.686712707
M5098	2B	0	0.029303281	0.453608247	99	-0.031562053	0.024040807	0.105260741	1.083941555
M14915	7A	699146276	0.029345442	0.12371134	99	-0.031562053	0.02401107	0.122621011	-1.527602294
M3376	2A	646604085	0.029366242	0.319587629	99	-0.031562053	0.023996417	0.118537125	-1.429101422
M9831	5A	6609542	0.029373396	0.340206186	99	-0.031562053	0.02399138	0.102900823	-1.082849311
M8849	4A	163167984	0.029407866	0.154639175	99	-0.031562053	0.023967127	0.114487893	-1.334714898
M8065	3B	479995417	0.029428048	0.113402062	99	-0.031562053	0.02395294	0.116262566	1.327745495
M8238	3B	825858454	0.029463364	0.360824742	99	-0.031562053	0.023928141	0.104591134	1.070002395
M3638	2B	306113161	0.029510941	0.175257732	99	-0.031562053	0.023894782	0.10884955	-1.208717243
M10491	5A	662956259	0.029647276	0.164948454	99	-0.031562053	0.023799503	0.122245342	-1.518191874
M10521	5A	691820950	0.029706019	0.463917526	99	-0.031562053	0.023758594	0.115185808	-1.350535625
M3419	2B	6205785	0.02971764	0.432989691	99	-0.031562053	0.023750511	0.105633927	1.092102138
M4206	2B	195059364	0.029776636	0.24742268	99	-0.031562053	0.023709529	0.117343629	-1.400662244
M2392	2A	24002743	0.029852632	0.381443299	99	-0.031562053	0.023656864	0.120131445	1.419499536
M3610	2B	46601701	0.029947456	0.329896907	99	-0.031562053	0.02359135	0.104004464	-1.105284201
M9225	4A	729895722	0.029951838	0.432989691	99	-0.031562053	0.023588328	0.101236521	-1.048471642
M4803	2B	127668612	0.030045816	0.18556701	99	-0.031562053	0.023523626	0.106859902	-1.165427493
M801	1B	37951885	0.030072173	0.329896907	99	-0.031562053	0.023505519	0.151582194	2.274210625
M4553	2B	632566016	0.030116301	0.24742268	99	-0.031562053	0.02347524	0.12733997	-1.645022035
M15477	7B	258623016	0.030117914	0.432989691	99	-0.031562053	0.023474133	0.120741178	1.434369066
M1038	1B	92259228	0.030208997	0.072164948	99	-0.031562053	0.023411788	0.128403555	-1.672159075
M11460	5B	546498743	0.030504033	0.484536082	99	-0.031562053	0.023211199	0.101637095	1.009798705
M9187	4A	50555579	0.030515044	0.195876289	99	-0.031562053	0.023203753	0.112811965	-1.29585769
M878	1B	22152407	0.030684932	0.329896907	99	-0.031562053	0.023089225	0.111847033	-1.274065114
M8351	3D	42633957	0.030911721	0.494845361	99	-0.031562053	0.022937384	0.112388692	1.240184435
M5922	2D	695112271	0.030926688	0.432989691	99	-0.031562053	0.022927405	0.127363375	-1.645070328
M2895	2A	0	0.031039176	0.432989691	99	-0.031562053	0.022852568	0.100957427	0.996387644
M9183	4A	707676969	0.031055077	0.154639175	99	-0.031562053	0.022842012	0.119903273	-1.460521497
M14379	7A	0	0.031123678	0.216494845	99	-0.031562053	0.022796539	0.119444756	1.403908426
M6376	3A	56679772	0.031160426	0.474226804	99	-0.031562053	0.022772223	0.127432815	1.601140022
M11147	5B	529048297	0.031192865	0.257731959	99	-0.031562053	0.022750785	0.107051253	-1.168747851
M5915	2D	606198497	0.031237779	0.144329897	99	-0.031562053	0.02272114	0.115496331	-1.35666139
M6646	3A	695611858	0.031401306	0.309278351	99	-0.031562053	0.022613588	0.102808077	-1.079563662
M8279	3D	10340203	0.031583094	0.350515464	99	-0.031562053	0.022494723	0.114753279	1.294336777
M10340	5A	555280221	0.031610477	0.195876289	99	-0.031562053	0.022476881	0.106707448	-1.161124827
M1358	1B	7319459	0.031620714	0.309278351	99	-0.031562053	0.022470215	0.105362166	1.087648391
M13155	6B	0	0.031705018	0.350515464	99	-0.031562053	0.022415407	0.105407497	-1.133489459
M3506	2B	24887527	0.031907673	0.216494845	99	-0.031562053	0.022284288	0.104098011	1.061355299
M6586	3A	662913097	0.031979149	0.391752577	99	-0.031562053	0.022238253	0.10825168	1.149604374
M2538	2A	0	0.032103773	0.134020619	99	-0.031562053	0.022158249	0.113631973	1.269064277
M7910	3B	159834993	0.032114099	0.463917526	99	-0.031562053	0.022151635	0.118982068	-1.437824883
M3311	2A	15352962	0.032360798	0.381443299	99	-0.031562053	0.021994286	0.100074679	0.979499846
M1873	1B	664777238	0.032389054	0.391752577	99	-0.031562053	0.021976344	0.114585856	1.291015492
M11854	5B	696426421	0.032432906	0.432989691	99	-0.031562053	0.021948534	0.111493782	1.221137812
M7721	3B	675281060	0.032433549	0.319587629	99	-0.031562053	0.021948127	0.132729914	-1.783671135
M8334	3D	38010250	0.032538179	0.288659794	99	-0.031562053	0.021881935	0.106305389	1.108201642
M370	1A	502682654	0.032553794	0.041237113	99	-0.031562053	0.021872075	0.146406005	2.121599763
M6334	3A	433329293	0.032607286	0.278350515	99	-0.031562053	0.021838339	0.122745831	-1.528492247
M5695	2D	712007919	0.032622647	0.329896907	99	-0.031562053	0.021828662	0.12244579	-1.52112581
M7804	3B	720217864	0.032706981	0.134020619	99	-0.031562053	0.02177562	0.11944817	1.40501092
M11128	5B	515039938	0.032756726	0.381443299	99	-0.031562053	0.021744401	0.110153725	1.191639906
M3001	2A	715387158	0.032782382	0.257731959	99	-0.031562053	0.02172832	0.128839338	1.638229182
M10019	5A	386840959	0.032892121	0.360824742	99	-0.031562053	0.021659684	0.102500627	1.028978159
M8836	4A	709792110	0.032892994	0.494845361	99	-0.031562053	0.021659139	0.126231906	1.571790258
M3664	2B	59764104	0.033014137	0.051546392	99	-0.031562053	0.021583656	0.149579946	-2.258999675
M2802	2A	192148059	0.033057289	0.164948454	99	-0.031562053	0.02155684	0.105962431	-1.144360525
M14068	6D	460468284	0.033458362	0.12371134	99	-0.031562053	0.021309363	0.127330373	1.599993014
M7647	3B	597784664	0.033465502	0.216494845	99	-0.031562053	0.021304986	0.12077805	-1.480038714
M7951	3B	0	0.033502704	0.422680412	99	-0.031562053	0.021282196	0.107020974	-1.166631085
M904	1B	5549025	0.033546701	0.443298969	99	-0.031562053	0.021255278	0.102553367	-1.072974595
M2304	1D	0	0.033726913	0.103092784	99	-0.031562053	0.021145414	0.129677597	-1.70277334
M15460	7B	583544299	0.033901021	0.278350515	99	-0.031562053	0.021039862	0.110060553	-1.232372387
M12823	6A	605225151	0.034015963	0.432989691	99	-0.031562053	0.020970495	0.139363711	1.921253912
M256	1A	381273827	0.034022239	0.381443299	99	-0.031562053	0.020966715	0.101117022	1.001498489
M11734	5B	0	0.034039916	0.319587629	99	-0.031562053	0.020956071	0.135791588	-1.864891597
M8392	3D	250050869	0.03408803	0.195876289	99	-0.031562053	0.020927131	0.123110465	1.49469154
M471	1A	520328681	0.034142963	0.206185567	99	-0.031562053	0.020894141	0.117952917	1.370394933
M8701	4A	141909718	0.034241876	0.474226804	99	-0.031562053	0.020834882	0.113899043	1.276464317
M783	1B	530442292	0.034341603	0.402061856	99	-0.031562053	0.020775319	0.122097413	-1.51155314
M15393	7B	500789093	0.034398011	0.041237113	99	-0.031562053	0.020741711	0.16844314	-2.858050854
M847	1B	17621853	0.034406917	0.381443299	99	-0.031562053	0.02073641	0.108197364	-1.191403364
M4531	2B	673234348	0.034655354	0.216494845	99	-0.031562053	0.020589124	0.11011666	1.19197876
M3606	2B	163007189	0.034734209	0.463917526	99	-0.031562053	0.020542609	0.098928809	-0.999233528
M9092	4A	690936373	0.034777756	0.144329897	99	-0.031562053	0.020516971	0.117857711	1.368527037
M2203	1D	433140936	0.034937528	0.288659794	99	-0.031562053	0.020423194	0.107060691	-1.16662236
M2282	1D	494063368	0.035010282	0.432989691	99	-0.031562053	0.020380643	0.120556374	-1.473764571
M8198	3B	819744121	0.035016645	0.319587629	99	-0.031562053	0.020376926	0.110873938	-1.249679945
M310	1A	362317345	0.035048487	0.195876289	99	-0.031562053	0.020358336	0.120570939	1.433376798
M14300	7A	17197201	0.035154641	0.412371134	99	-0.031562053	0.020296491	0.121078004	1.445691804
M13644	6B	458008990	0.035248517	0.453608247	99	-0.031562053	0.020241965	0.126755444	1.586452306
M12573	6A	524836376	0.035259859	0.350515464	99	-0.031562053	0.020235387	0.107431686	1.133921338
M73	1A	10127837	0.03538037	0.268041237	99	-0.031562053	0.020165641	0.106484655	1.113732534
M9364	4A	0	0.035406179	0.360824742	99	-0.031562053	0.020150736	0.108384207	-1.194864374
M4632	2B	719966802	0.035621906	0.113402062	99	-0.031562053	0.020026609	0.129450485	-1.695769404
M1025	1B	129070027	0.035628566	0.340206186	99	-0.031562053	0.020022789	0.112112289	-1.276939313
M7052	3B	447667963	0.035704894	0.06185567	99	-0.031562053	0.019979071	0.141024241	1.968804587
M2932	2A	690962390	0.035835771	0.072164948	99	-0.031562053	0.01990434	0.130518321	1.68359887
M10242	5A	224479989	0.0358694	0.360824742	99	-0.031562053	0.019885185	0.101843344	1.017321491
M8253	3D	16234201	0.03593863	0.350515464	99	-0.031562053	0.019845811	0.10976138	-1.224601872
M4530	2B	672081113	0.035984082	0.453608247	99	-0.031562053	0.019820004	0.114874303	-1.339430552
M8668	4A	146943997	0.036090471	0.453608247	99	-0.031562053	0.019759736	0.121602499	1.458957044
M2800	2A	296758181	0.036104135	0.092783505	99	-0.031562053	0.019752009	0.127396943	1.603246094
M207	1A	327958495	0.036187312	0.422680412	99	-0.031562053	0.01970504	0.111436287	1.222099568
M4186	2B	704118285	0.036187687	0.412371134	99	-0.031562053	0.019704828	0.115175163	-1.346236652
M7465	3B	206291923	0.036222787	0.195876289	99	-0.031562053	0.019685043	0.103913516	-1.09948693
M1476	1B	544133182	0.036258509	0.257731959	99	-0.031562053	0.019664927	0.126195037	1.572853805
M10771	5B	278878242	0.036502885	0.474226804	99	-0.031562053	0.019527882	0.124681474	-1.574074889
M4528	2B	547273650	0.036506644	0.453608247	99	-0.031562053	0.019525781	0.112947096	1.256178865
M586	1A	409523520	0.036535239	0.257731959	99	-0.031562053	0.019509811	0.105031708	1.083656154
M10987	5B	476806091	0.036655021	0.360824742	99	-0.031562053	0.019443057	0.124608989	1.533296966
M15475	7B	594218929	0.036745439	0.453608247	99	-0.031562053	0.019392821	0.117301563	1.356572848
M2718	2A	44973108	0.036839923	0.443298969	99	-0.031562053	0.019340466	0.123753084	-1.55082305
M12496	6A	317631893	0.036861981	0.206185567	99	-0.031562053	0.019328264	0.107322398	-1.171137978
M3635	2B	504867107	0.03696664	0.360824742	99	-0.031562053	0.019270476	0.162646974	2.626133349
M8225	3B	0	0.037019407	0.371134021	99	-0.031562053	0.019241407	0.110381895	1.199174862
M5776	2D	590146863	0.037034092	0.206185567	99	-0.031562053	0.019233324	0.111892473	1.232759229
M8147	3B	812610831	0.037130324	0.12371134	99	-0.031562053	0.019180445	0.123774367	-1.551189849
M9312	4A	0	0.037207999	0.463917526	99	-0.031562053	0.019137869	0.122015615	1.46964316
M12113	6A	0	0.037240856	0.474226804	99	-0.031562053	0.019119888	0.096939592	-0.958848331
M12765	6A	596176929	0.037288666	0.195876289	99	-0.031562053	0.019093754	0.110354566	1.198719273
M7946	3B	747096505	0.037330019	0.463917526	99	-0.031562053	0.019071178	0.118758208	1.391280017
M7934	3B	752401287	0.037330019	0.463917526	99	-0.031562053	0.019071178	0.117141318	-1.391280017
M7938	3B	754014085	0.037330019	0.463917526	99	-0.031562053	0.019071178	0.117141318	-1.391280017
M14516	7A	57742411	0.037396378	0.391752577	99	-0.031562053	0.019035007	0.10153216	1.011842955
M13437	6B	617644199	0.03741919	0.329896907	99	-0.031562053	0.019022588	0.102043467	-1.060309514
M8801	4A	603746204	0.037501315	0.216494845	99	-0.031562053	0.018977947	0.107279843	1.131918525
M10397	5A	577799083	0.037579299	0.484536082	99	-0.031562053	0.018935652	0.120994526	1.445031876
M7913	3B	754771178	0.037707363	0.134020619	99	-0.031562053	0.0188664	0.116235705	-1.36994031
M3743	2B	72430081	0.037762069	0.144329897	99	-0.031562053	0.018836893	0.110088118	-1.230776261
M14941	7A	701052545	0.03779039	0.422680412	99	-0.031562053	0.018821636	0.099257269	-1.004022182
M1405	1B	354331707	0.03783255	0.329896907	99	-0.031562053	0.018798945	0.102814563	1.038284493
M9055	4A	687327397	0.037933574	0.391752577	99	-0.031562053	0.018744684	0.157874424	-2.511178073
M5025	2B	23306994	0.038108237	0.402061856	99	-0.031562053	0.018651233	0.10044606	-1.027592325
M1798	1B	646777010	0.03812331	0.020618557	99	-0.031562053	0.018643189	0.17026175	-2.917549547
M4508	2B	690747730	0.038160969	0.340206186	99	-0.031562053	0.018623109	0.1013514	-1.045833729
M8106	3B	0	0.038192492	0.092783505	99	-0.031562053	0.018606317	0.121807725	1.465105878
M14164	7A	3010352	0.038220086	0.484536082	99	-0.031562053	0.018591629	0.109752107	-1.223144129
M14801	7A	577687730	0.038233357	0.391752577	99	-0.031562053	0.018584569	0.09669748	-0.953624831
M4337	2B	457674991	0.038300041	0.350515464	99	-0.031562053	0.018549136	0.097841954	-0.975853928
M14070	6D	451938140	0.038393325	0.298969072	99	-0.031562053	0.018499677	0.107907402	1.145901056
M10834	5B	417804694	0.038442229	0.082474227	99	-0.031562053	0.018473801	0.125753155	-1.599859398
M9201	4A	714077495	0.038479843	0.144329897	99	-0.031562053	0.018453922	0.130886469	-1.731580703
M10509	5A	680512404	0.038605481	0.051546392	99	-0.031562053	0.018387671	0.135781251	1.825267127
M10857	5B	43702204	0.038775475	0.422680412	99	-0.031562053	0.018298397	0.121822792	1.465780867
M9091	4A	690936373	0.03899512	0.309278351	99	-0.031562053	0.018183665	0.131409893	-1.745039662
M9116	4A	700739397	0.03900669	0.092783505	99	-0.031562053	0.01817764	0.121717463	-1.499691728
M6612	3A	681663202	0.039014622	0.463917526	99	-0.031562053	0.018173512	0.106056568	1.106626048
M7774	3B	727794861	0.039029468	0.134020619	99	-0.031562053	0.018165786	0.112984774	-1.294721697
M11160	5B	492257250	0.039089999	0.072164948	99	-0.031562053	0.018134318	0.125181972	-1.585186919
M8260	3D	0	0.039142509	0.360824742	99	-0.031562053	0.018107062	0.105388414	-1.128778849
M6318	3A	321105083	0.039301901	0.474226804	99	-0.031562053	0.018024567	0.124458831	1.530975495
M14121	6D	471828189	0.039330407	0.484536082	99	-0.031562053	0.018009851	0.100166422	-1.021341058
M7989	3B	572633902	0.039403428	0.443298969	99	-0.031562053	0.017972206	0.094435257	-0.909773976
M1757	1B	0	0.039639855	0.072164948	99	-0.031562053	0.01785083	0.123060822	-1.532247424
M3696	2B	69066012	0.039646209	0.103092784	99	-0.031562053	0.017847579	0.129134677	1.649728908
M1193	1B	0	0.039652249	0.309278351	99	-0.031562053	0.017844489	0.130058402	1.6736743
M697	1A	491804002	0.039757494	0.463917526	99	-0.031562053	0.017790725	0.116240939	-1.36898631
M10095	5A	470192572	0.039992456	0.350515464	99	-0.031562053	0.017671242	0.10184471	1.019563247
M3671	2B	43291957	0.040076676	0.453608247	99	-0.031562053	0.017628597	0.098685175	0.956247777
M12019	5D	704165878	0.040191426	0.257731959	99	-0.031562053	0.017570647	0.108306266	1.155454081
M13179	6B	0	0.040283174	0.288659794	99	-0.031562053	0.01752444	0.107966998	1.148162829
M8180	3B	822819663	0.040288785	0.072164948	99	-0.031562053	0.017521618	0.137085709	1.861727545
M690	1A	592499382	0.040299675	0.206185567	99	-0.031562053	0.017516142	0.113029148	-1.295074979
M14814	7A	635682971	0.040380734	0.24742268	99	-0.031562053	0.01747543	0.101688893	-1.051538519
M15173	7B	10160995	0.040458472	0.360824742	99	-0.031562053	0.017436467	0.100625574	-1.029987084
M3268	2A	770146684	0.040537855	0.484536082	99	-0.031562053	0.017396763	0.096947454	-0.957277642
M9028	4A	49368188	0.040647603	0.06185567	99	-0.031562053	0.017342008	0.148459065	-2.22135142
M1566	1B	592833254	0.040679183	0.371134021	99	-0.031562053	0.017326282	0.097890644	0.940931546
M6100	3A	18157039	0.040764299	0.06185567	99	-0.031562053	0.01728396	0.154311916	-2.39850069
M10514	5A	500021792	0.040775405	0.195876289	99	-0.031562053	0.017278445	0.116729628	1.345302154
M10380	5A	568234271	0.040775405	0.195876289	99	-0.031562053	0.017278445	0.115239911	-1.345302154
M5123	2B	777295189	0.040930532	0.113402062	99	-0.031562053	0.017201576	0.122283017	-1.512515196
M7955	3B	759709211	0.040949802	0.453608247	99	-0.031562053	0.01719205	0.114503667	1.29391693
M3543	2B	28014544	0.040994139	0.092783505	99	-0.031562053	0.017170148	0.12547008	-1.591444246
M8911	4A	32202337	0.041223568	0.340206186	99	-0.031562053	0.017057217	0.132738067	-1.778996657
M4669	2B	576580481	0.041358759	0.494845361	99	-0.031562053	0.016990987	0.121146342	1.450652619
M8768	4A	597058372	0.041437169	0.195876289	99	-0.031562053	0.016952681	0.10342095	-1.086541972
M7948	3B	761498146	0.041447586	0.371134021	99	-0.031562053	0.016947597	0.146840544	-2.173162138
M3381	2A	585501135	0.041519455	0.371134021	99	-0.031562053	0.016912563	0.121538299	1.460243245
M13063	6B	32616023	0.041540437	0.278350515	99	-0.031562053	0.016902347	0.102574524	1.035250949
M3237	2A	760509250	0.041654737	0.412371134	99	-0.031562053	0.016846793	0.116119783	-1.36522719
M3720	2B	73990357	0.041682604	0.051546392	99	-0.031562053	0.016833273	0.133602696	-1.801801298
M8683	4A	269059397	0.041699227	0.463917526	99	-0.031562053	0.016825213	0.110027967	-1.227440567
M755	1B	2358221	0.041714279	0.494845361	99	-0.031562053	0.016817918	0.125236996	1.551612587
M759	1B	13027114	0.041837476	0.381443299	99	-0.031562053	0.016758312	0.106121928	-1.142944679
M8109	3B	42103334	0.041849282	0.041237113	99	-0.031562053	0.01675261	0.144592943	-2.107464539
M10889	5B	367689148	0.041868471	0.226804124	99	-0.031562053	0.016743346	0.115610799	1.319842339
M7806	3B	673217142	0.041984905	0.391752577	99	-0.031562053	0.016687229	0.094439361	-0.908566526
M13507	6B	502906219	0.04198707	0.402061856	99	-0.031562053	0.016686187	0.141054816	1.972959915
M149	1A	27753403	0.042095258	0.484536082	99	-0.031562053	0.016634197	0.107819923	1.145879386
M7303	3B	538369580	0.042123673	0.06185567	99	-0.031562053	0.016620566	0.130873934	1.696178102
M7428	3B	303590858	0.042219601	0.154639175	99	-0.031562053	0.016574619	0.108240546	1.155026968
M6488	3A	598916422	0.042389804	0.422680412	99	-0.031562053	0.016493372	0.100119949	0.985907039
M7036	3B	15808845	0.042433999	0.474226804	99	-0.031562053	0.016472332	0.108544978	1.161728902
M12718	6A	344058238	0.042634819	0.082474227	99	-0.031562053	0.016377024	0.127603023	-1.644630178
M14259	7A	0	0.042728595	0.391752577	99	-0.031562053	0.016332682	0.102352713	-1.063940469
M2771	2A	432372670	0.042815082	0.463917526	99	-0.031562053	0.01629188	0.13638401	1.843767941
M10349	5A	513747718	0.04291028	0.494845361	99	-0.031562053	0.016247069	0.116058149	-1.363196457
M8316	3D	46582531	0.042949913	0.350515464	99	-0.031562053	0.016228445	0.1045678	1.077214025
M8745	4A	478288955	0.042958618	0.381443299	99	-0.031562053	0.016224357	0.11631222	-1.369077601
M4956	2B	762916610	0.043088642	0.164948454	99	-0.031562053	0.016163399	0.11451407	-1.327510613
M4566	2B	692625689	0.043132403	0.494845361	99	-0.031562053	0.016142927	0.109680543	-1.219125075
M6285	3A	695818860	0.043132947	0.371134021	99	-0.031562053	0.016142672	0.142149	-2.036776481
M2044	1D	33589188	0.043134744	0.288659794	99	-0.031562053	0.016141832	0.101437914	-1.045106869
M10265	5A	695616717	0.043365205	0.144329897	99	-0.031562053	0.016034392	0.113891336	-1.313158037
M13313	6B	452530948	0.043392459	0.494845361	99	-0.031562053	0.016021727	0.116865084	-1.381766513
M11443	5B	649097848	0.043393672	0.24742268	99	-0.031562053	0.016021163	0.107962003	-1.181600563
M5747	2D	593851647	0.043410182	0.494845361	99	-0.031562053	0.016013495	0.120344582	1.432268342
M8319	3D	37969650	0.043443526	0.18556701	99	-0.031562053	0.015998018	0.107337957	-1.16814171
M10366	5A	568062464	0.043481113	0.175257732	99	-0.031562053	0.015980587	0.117021059	1.353412232
M8196	3B	819037462	0.043541708	0.350515464	99	-0.031562053	0.015952519	0.108705269	1.165731033
M10783	5B	412238621	0.043641962	0.443298969	99	-0.031562053	0.015906174	0.122655854	-1.520352026
M12062	6A	5854616	0.043667625	0.134020619	99	-0.031562053	0.015894329	0.117892369	-1.405755386
M6106	3A	283594306	0.04369531	0.237113402	99	-0.031562053	0.015881558	0.104317045	-1.104086138
M12956	6B	8781678	0.043709428	0.051546392	99	-0.031562053	0.01587505	0.150407312	2.246360892
M13178	6B	0	0.043714013	0.371134021	99	-0.031562053	0.015872936	0.093972144	-0.898949326
M1864	1B	0	0.043734028	0.103092784	99	-0.031562053	0.015863714	0.119344601	-1.440177086
M5219	2B	0	0.043885954	0.381443299	99	-0.031562053	0.015793855	0.103688206	1.059330556
M1916	1B	676984396	0.043954753	0.175257732	99	-0.031562053	0.015762306	0.108135547	1.15356734
M4121	2B	305658684	0.043981359	0.463917526	99	-0.031562053	0.015750119	0.11107155	-1.249439032
M10369	5A	568264305	0.0440673	0.432989691	99	-0.031562053	0.015710808	0.111901856	-1.267913346
M7529	3B	414191577	0.044145158	0.144329897	99	-0.031562053	0.015675264	0.110868272	1.213502112
M2533	2A	573217596	0.044173077	0.494845361	99	-0.031562053	0.015662536	0.120043444	-1.456705391
M8924	4A	50074687	0.044184371	0.041237113	99	-0.031562053	0.015657389	0.142250943	-2.039190473
M8673	4A	232125986	0.044346705	0.381443299	99	-0.031562053	0.015583568	0.113637451	-1.306930604
M9216	4A	720887655	0.044426077	0.237113402	99	-0.031562053	0.015547578	0.106108533	-1.141449645
M13108	6B	24914373	0.044434922	0.175257732	99	-0.031562053	0.015543572	0.103476629	-1.086284844
M7722	3B	675281060	0.044515896	0.082474227	99	-0.031562053	0.015506935	0.123421389	1.507776994
M14061	6D	450169167	0.044896106	0.12371134	99	-0.031562053	0.015335858	0.110526419	-1.236944797
M2240	1D	462074136	0.044930414	0.12371134	99	-0.031562053	0.015320498	0.130001298	-1.705354235
M8005	3B	0	0.044951215	0.072164948	99	-0.031562053	0.015311191	0.127011177	1.597872707
M8293	3D	17391691	0.045108503	0.350515464	99	-0.031562053	0.015240964	0.108634378	1.164901842
M1168	1B	34945936	0.045119849	0.082474227	99	-0.031562053	0.015235909	0.122977229	1.497103966
M9625	4B	652962151	0.045130757	0.443298969	99	-0.031562053	0.015231049	0.095962704	0.905652999
M856	1B	41526660	0.045170533	0.463917526	99	-0.031562053	0.015213341	0.099614447	-1.007517137
M5537	2D	403467899	0.045179235	0.288659794	99	-0.031562053	0.015209469	0.103921203	1.064752178
M657	1A	583529682	0.045270065	0.371134021	99	-0.031562053	0.015169102	0.141341819	-2.012920094
M8104	3B	805555961	0.045327407	0.381443299	99	-0.031562053	0.015143663	0.127898375	1.620655769
M13399	6B	597558242	0.045398033	0.432989691	99	-0.031562053	0.015112377	0.103178569	-1.079694078
M3690	2B	69047995	0.045425913	0.494845361	99	-0.031562053	0.015100042	0.102343976	1.032328908
M15028	7A	711324238	0.045433701	0.412371134	99	-0.031562053	0.015096597	0.1005734	0.996404278
M14378	7A	701571182	0.045524782	0.24742268	99	-0.031562053	0.015056362	0.101971069	-1.054866246
M6540	3A	662527377	0.04554491	0.288659794	99	-0.031562053	0.015047482	0.09666416	-0.949443456
M3864	2B	0	0.045585787	0.103092784	99	-0.031562053	0.015029461	0.123146845	1.501485076
M8206	3B	743193869	0.045871385	0.340206186	99	-0.031562053	0.014904033	0.109284986	1.179416778
M9913	5A	36718388	0.045907133	0.12371134	99	-0.031562053	0.014888393	0.10987519	1.19236734
M8226	3B	0	0.045936736	0.268041237	99	-0.031562053	0.014875451	0.108592419	1.164355905
M11903	5D	272149005	0.04596637	0.092783505	99	-0.031562053	0.014862504	0.125847959	-1.598633388
M111	1A	329686048	0.04599065	0.443298969	99	-0.031562053	0.014851903	0.100134313	-1.01753996
M3742	2B	48838344	0.046050837	0.494845361	99	-0.031562053	0.01482565	0.118223628	-1.412508279
M15380	7B	458724766	0.046099876	0.371134021	99	-0.031562053	0.014804288	0.144303651	-2.097158669
M14173	7A	8774175	0.046134304	0.443298969	99	-0.031562053	0.014789304	0.111855026	1.23636539
M8959	4A	648906704	0.046203591	0.144329897	99	-0.031562053	0.014759186	0.114768383	-1.33193736
M6016	2D	247051054	0.046377896	0.051546392	99	-0.031562053	0.014683633	0.150067914	-2.266721515
M394	1A	623753947	0.04644278	0.257731959	99	-0.031562053	0.014655587	0.113725956	-1.308014891
M6633	3A	292579611	0.046464367	0.24742268	99	-0.031562053	0.014646265	0.109656666	1.187812169
M6720	3A	714455841	0.046470102	0.319587629	99	-0.031562053	0.014643789	0.099895885	-1.012562574
M4164	2B	680760736	0.046490598	0.175257732	99	-0.031562053	0.014634944	0.107734078	-1.1752981
M11113	5B	531194944	0.04649941	0.381443299	99	-0.031562053	0.014631142	0.139826895	1.940524922
M2261	1D	471639676	0.046552132	0.474226804	99	-0.031562053	0.014608413	0.119268491	-1.437105718
M14816	7A	635948697	0.046616301	0.288659794	99	-0.031562053	0.014580787	0.097174282	0.929703316
M9251	4A	14922497	0.046665046	0.371134021	99	-0.031562053	0.014559828	0.118857311	-1.427265874
M15176	7B	15592633	0.046684736	0.06185567	99	-0.031562053	0.014551369	0.132418229	1.738907373
M8199	3B	610544393	0.046724148	0.319587629	99	-0.031562053	0.014534448	0.106108157	-1.140428552
M2544	2A	43291957	0.046726704	0.082474227	99	-0.031562053	0.014533351	0.122144621	-1.506464201
M8224	3B	829535069	0.046755991	0.350515464	99	-0.031562053	0.014520788	0.106325393	1.115988134
M702	1B	3572450	0.046859414	0.319587629	99	-0.031562053	0.014476489	0.104870572	-1.114260168
M14800	7A	580656999	0.046882045	0.381443299	99	-0.031562053	0.01446681	0.105716514	-1.132064937
M8192	3B	0	0.046941922	0.329896907	99	-0.031562053	0.014441225	0.109181805	1.177625425
M8663	4A	25985595	0.047018511	0.06185567	99	-0.031562053	0.014408549	0.13149712	1.714740707
M3974	2B	159604259	0.047054375	0.360824742	99	-0.031562053	0.014393268	0.104149293	-1.09910079
M3707	2B	293132103	0.047071693	0.134020619	99	-0.031562053	0.014385894	0.115375792	1.316771447
M14331	7A	22088450	0.047133312	0.350515464	99	-0.031562053	0.014359678	0.100877504	1.003267401
M5955	2D	647308726	0.047147969	0.278350515	99	-0.031562053	0.014353448	0.123402463	-1.537170234
M9218	4A	726716286	0.047163335	0.484536082	99	-0.031562053	0.014346919	0.09963411	-1.007042496
M6504	3A	627917165	0.047193497	0.268041237	99	-0.031562053	0.014334108	0.103739117	-1.090514552
M15342	7B	354961752	0.047223226	0.134020619	99	-0.031562053	0.014321491	0.119392098	-1.439768797
M62	1A	4497727	0.047551361	0.371134021	99	-0.031562053	0.014182788	0.117151168	-1.386622407
M8807	4A	601841436	0.047571324	0.422680412	99	-0.031562053	0.014174382	0.122279671	-1.509406173
M5784	2D	611125588	0.047580042	0.226804124	99	-0.031562053	0.014170713	0.101548045	1.017029839
M10502	5A	0	0.047621713	0.24742268	99	-0.031562053	0.014153183	0.104208745	1.07179307
M8364	3D	436621773	0.047624884	0.453608247	99	-0.031562053	0.01415185	0.114792248	-1.331877864
M10582	5B	21538502	0.047648206	0.278350515	99	-0.031562053	0.014142047	0.102356195	1.033537028
M1549	1B	566170601	0.04768211	0.350515464	99	-0.031562053	0.014127806	0.164508273	-2.720425003
M1527	1B	564653541	0.047688099	0.237113402	99	-0.031562053	0.014125291	0.099221361	0.970362556
M5249	2B	765677047	0.048041176	0.030927835	99	-0.031562053	0.013977642	0.153225827	-2.361793039
M3180	2A	779809063	0.048046081	0.443298969	99	-0.031562053	0.013975599	0.104475429	1.077535922
M15277	7B	106862437	0.048115741	0.453608247	99	-0.031562053	0.01394661	0.093376317	-0.885860269
M13473	6B	326519235	0.048118038	0.175257732	99	-0.031562053	0.013945655	0.115141567	-1.339703701
M5040	2B	767024523	0.048192991	0.237113402	99	-0.031562053	0.013914514	0.106183799	-1.141414437
M13296	6B	199924345	0.048223989	0.474226804	99	-0.031562053	0.013901651	0.093904985	-0.895716267
M7039	3B	17613543	0.048333091	0.206185567	99	-0.031562053	0.013856447	0.112029147	1.241196525
M580	1A	565296725	0.048346129	0.030927835	99	-0.031562053	0.013851052	0.148464977	-2.218035996
M57	1A	362741398	0.048374868	0.381443299	99	-0.031562053	0.013839167	0.118447924	1.3891519
M12233	6A	0	0.048510771	0.402061856	99	-0.031562053	0.013783064	0.124061341	1.52533857
M3937	2B	652870583	0.048561763	0.092783505	99	-0.031562053	0.013762057	0.120707974	-1.470803547
M5641	2D	587305772	0.04860718	0.134020619	99	-0.031562053	0.013743367	0.109742836	1.190605635
M8158	3B	75766790	0.048624833	0.195876289	99	-0.031562053	0.013736107	0.108843417	1.170952835
M8127	3B	596885708	0.04864156	0.381443299	99	-0.031562053	0.013729231	0.104619302	1.080790605
M568	1A	567987926	0.048659315	0.463917526	99	-0.031562053	0.013721935	0.095299366	-0.921918859
M109	1A	0	0.048719488	0.453608247	99	-0.031562053	0.01369723	0.110829241	-1.242009298
M8895	4A	635530599	0.048726712	0.412371134	99	-0.031562053	0.013694266	0.098754999	0.961560715
M2126	1D	530415631	0.048748559	0.226804124	99	-0.031562053	0.013685306	0.118823087	1.398207296
M4717	2B	717090293	0.048840188	0.432989691	99	-0.031562053	0.013647773	0.127615774	-1.642226357
M8948	4A	91210964	0.048842174	0.268041237	99	-0.031562053	0.01364696	0.097531997	-0.964896007
M8322	3D	37969650	0.048859562	0.268041237	99	-0.031562053	0.013639846	0.100507762	0.996541183
M9818	4D	506347889	0.049022419	0.268041237	99	-0.031562053	0.013573351	0.100940392	-1.032469624
M9335	4A	0	0.049175138	0.237113402	99	-0.031562053	0.01351121	0.099147548	-0.996534836
M6826	3A	730650978	0.049231389	0.175257732	99	-0.031562053	0.013488375	0.113700383	1.279289326
M11362	5B	180679040	0.049249415	0.206185567	99	-0.031562053	0.013481063	0.100929223	-1.032151866
M5839	2D	571920602	0.049321865	0.474226804	99	-0.031562053	0.013451703	0.111630677	-1.259592501
M8445	3D	728753357	0.049345599	0.432989691	99	-0.031562053	0.013442095	0.108801787	1.170340789
M1831	1B	476275567	0.049417121	0.319587629	99	-0.031562053	0.013413172	0.107420956	-1.167339361
M12378	6A	64324098	0.049438657	0.298969072	99	-0.031562053	0.013404472	0.102435578	1.035900282
M3774	2B	115645238	0.049522291	0.463917526	99	-0.031562053	0.013370724	0.100992085	1.006569395
M7190	3B	692937796	0.049565492	0.072164948	99	-0.031562053	0.013353315	0.130795604	1.697395676
M15138	7A	736378833	0.049574636	0.329896907	99	-0.031562053	0.013349633	0.139511866	1.933006435
M11548	5B	332444025	0.049685813	0.041237113	99	-0.031562053	0.013304916	0.139985965	-1.972911955
M6510	3A	634947372	0.049743598	0.494845361	99	-0.031562053	0.013281717	0.105298404	1.095493681
M13333	6B	218963791	0.049815871	0.432989691	99	-0.031562053	0.013252741	0.112620778	-1.281596713
M969	1B	137130287	0.0498436	0.494845361	99	-0.031562053	0.013241636	0.117863204	-1.402415123
M8758	4A	595433064	0.049978755	0.216494845	99	-0.031562053	0.013187604	0.098014523	-0.973872267
M10029	5A	439550987	0.050060167	0.494845361	99	-0.031562053	0.013155133	0.097234647	0.932302533
M4560	2B	0	0.050168578	0.051546392	99	-0.031562053	0.013111982	0.136210373	1.842214587
M3498	2B	15467656	0.050171148	0.443298969	99	-0.031562053	0.01311096	0.097946798	-0.972468489
M706	1B	3572450	0.050187305	0.474226804	99	-0.031562053	0.013104538	0.095222968	0.893636819
M7306	3B	537220619	0.05025652	0.18556701	99	-0.031562053	0.013077051	0.10310024	-1.07604301
M8340	3D	37969599	0.050279163	0.092783505	99	-0.031562053	0.013068068	0.116764158	-1.376454921
M3971	2B	128269909	0.050399171	0.319587629	99	-0.031562053	0.01302053	0.103485709	-1.083949719
M8181	3B	38722483	0.050401998	0.309278351	99	-0.031562053	0.013019412	0.09861362	-0.98548401
M8509	3D	822833396	0.050529086	0.412371134	99	-0.031562053	0.012969205	0.095115261	-0.917660491
M2169	1D	423928525	0.050542639	0.381443299	99	-0.031562053	0.012963858	0.106861069	1.128964944
M6571	3A	655669363	0.05056752	0.371134021	99	-0.031562053	0.012954048	0.102372384	1.035056448
M996	1B	344338837	0.050661427	0.350515464	99	-0.031562053	0.012917066	0.163039828	2.645281478
M991	1B	105260223	0.050661427	0.350515464	99	-0.031562053	0.012917066	0.162245629	-2.645281478
M9850	5A	27470847	0.050669883	0.237113402	99	-0.031562053	0.01291374	0.109726163	1.191069353
M4435	2B	620850327	0.050715281	0.24742268	99	-0.031562053	0.012895892	0.100576237	-1.024453843
M9008	4A	666991274	0.050808891	0.092783505	99	-0.031562053	0.012859142	0.122519461	-1.513960967
M9005	4A	668285271	0.050839305	0.443298969	99	-0.031562053	0.012847218	0.108294584	1.15992447
M990	1B	577431009	0.050862618	0.18556701	99	-0.031562053	0.012838083	0.111817973	-1.263163992
M11648	5B	609144429	0.050875198	0.257731959	99	-0.031562053	0.012833156	0.115353245	1.317803965
M7260	3B	47019723	0.05089912	0.432989691	99	-0.031562053	0.01282379	0.10354119	1.059254016
M134	1A	46292062	0.050901779	0.402061856	99	-0.031562053	0.012822749	0.096699567	0.922257869
M9934	5A	139519642	0.050959124	0.329896907	99	-0.031562053	0.012800317	0.109564672	-1.213242059
M1782	1B	644598781	0.051115265	0.226804124	99	-0.031562053	0.012739375	0.099064424	0.968636638
M2047	1D	10650564	0.051139696	0.268041237	99	-0.031562053	0.012729858	0.122445987	1.486572107
M3134	2A	633678135	0.051224802	0.072164948	99	-0.031562053	0.012696742	0.126204869	1.580070142
M8556	4A	137524931	0.05128812	0.237113402	99	-0.031562053	0.012672143	0.102236364	1.032555277
M12907	6A	615640353	0.051300804	0.432989691	99	-0.031562053	0.012667219	0.103559719	1.059794318
M9019	4A	231448891	0.051306778	0.072164948	99	-0.031562053	0.0126649	0.137970667	1.890925598
M3126	2A	751096174	0.051384207	0.030927835	99	-0.031562053	0.012634875	0.150179097	-2.268010985
M8194	3B	818284655	0.051386833	0.329896907	99	-0.031562053	0.012633858	0.108272387	1.159657126
M6457	3A	570114845	0.05151195	0.257731959	99	-0.031562053	0.012585446	0.097731963	0.942568222
M10488	5A	481112347	0.051605759	0.288659794	99	-0.031562053	0.01254923	0.101288048	1.013377633
M8854	4A	301817649	0.051711686	0.402061856	99	-0.031562053	0.012508422	0.106377063	1.119099535
M3927	2B	180555363	0.051725552	0.319587629	99	-0.031562053	0.012503087	0.111239702	-1.24993022
M8990	4A	635530051	0.051815651	0.402061856	99	-0.031562053	0.012468458	0.138895749	1.916734446
M4907	2B	56998893	0.051907094	0.463917526	99	-0.031562053	0.012433378	0.102018303	1.028340031
M13141	6B	76216654	0.052098858	0.350515464	99	-0.031562053	0.012360027	0.113729848	1.281087803
M2973	2A	541992663	0.052119924	0.463917526	99	-0.031562053	0.012351987	0.096373171	-0.941130787
M11140	5B	415747285	0.05215562	0.072164948	99	-0.031562053	0.012338371	0.137236222	-1.895716428
M9281	4A	688382396	0.052389632	0.494845361	99	-0.031562053	0.012249358	0.108431296	1.163485236
M7106	3B	21863643	0.052390663	0.24742268	99	-0.031562053	0.012248967	0.12332636	1.50869014
M9703	4B	86304081	0.052408216	0.237113402	99	-0.031562053	0.012242307	0.102465532	1.037676211
M6260	3A	35421181	0.052570847	0.226804124	99	-0.031562053	0.012180721	0.109903816	1.195704147
M13135	6B	55677178	0.052653926	0.216494845	99	-0.031562053	0.01214934	0.106619571	1.124623952
M198	1A	50833300	0.052821888	0.020618557	99	-0.031562053	0.012086057	0.15618291	-2.451396185
M8243	3D	0	0.052909018	0.329896907	99	-0.031562053	0.012053315	0.108538901	1.166015993
M8283	3D	7272771	0.052909018	0.329896907	99	-0.031562053	0.012053315	0.107422655	-1.166015993
M69	1A	10423224	0.052931373	0.360824742	99	-0.031562053	0.012044924	0.120164264	-1.455989952
M8019	3B	765843802	0.05298065	0.113402062	99	-0.031562053	0.01202644	0.115082084	1.312362167
M12011	5D	552080511	0.052997758	0.484536082	99	-0.031562053	0.012020028	0.1073573	-1.164579015
M7953	3B	761778756	0.053400377	0.432989691	99	-0.031562053	0.01186975	0.119946407	-1.450583804
M55	1A	1673825	0.053597814	0.371134021	99	-0.031562053	0.011796503	0.093830674	-0.89221604
M15493	7B	17418419	0.053852759	0.463917526	99	-0.031562053	0.011702349	0.12260127	1.491404783
M9065	4A	590854832	0.053881163	0.422680412	99	-0.031562053	0.011691889	0.131920634	1.728613471
M7646	3B	590292239	0.053900204	0.226804124	99	-0.031562053	0.01168488	0.11434286	-1.31911384
M238	1A	342385275	0.05394885	0.06185567	99	-0.031562053	0.011666986	0.125704904	1.568505315
M15125	7A	734524063	0.053958867	0.453608247	99	-0.031562053	0.011663304	0.112953221	1.264179703
M6568	3A	658048755	0.054041019	0.350515464	99	-0.031562053	0.01163313	0.110166619	-1.225301532
M13382	6B	449771887	0.054110028	0.24742268	99	-0.031562053	0.011607823	0.098640601	0.961388989
M5941	2D	625109798	0.054123582	0.340206186	99	-0.031562053	0.011602856	0.107970052	1.154150348
M721	1B	650103669	0.054133845	0.072164948	99	-0.031562053	0.011599097	0.124872765	1.547721644
M8309	3D	27672263	0.054133943	0.340206186	99	-0.031562053	0.011599061	0.107365571	1.141137524
M8325	3D	310971726	0.054133943	0.340206186	99	-0.031562053	0.011599061	0.107365571	1.141137524
M8312	3D	28573708	0.054133943	0.340206186	99	-0.031562053	0.011599061	0.106279747	-1.141137524
M9199	4A	50748255	0.05419862	0.453608247	99	-0.031562053	0.011575384	0.124260086	-1.555632284
M13684	6B	707207597	0.054371822	0.422680412	99	-0.031562053	0.01151213	0.097473564	-0.961621707
M14168	7A	8934681	0.054380448	0.103092784	99	-0.031562053	0.011508986	0.113728028	1.28189746
M8219	3B	825858484	0.054430097	0.381443299	99	-0.031562053	0.011490897	0.103842562	1.066836875
M3002	2A	715387158	0.05448534	0.350515464	99	-0.031562053	0.011470791	0.096315726	-0.939142696
M1994	1D	8463818	0.054610055	0.350515464	99	-0.031562053	0.011425481	0.116861816	-1.377093877
M2014	1D	104987425	0.054610055	0.350515464	99	-0.031562053	0.011425481	0.116861816	-1.377093877
M5095	2B	772063506	0.054668889	0.443298969	99	-0.031562053	0.011404144	0.118558704	-1.41702077
M3750	2B	409194219	0.054750639	0.092783505	99	-0.031562053	0.011374539	0.12202831	1.477716304
M6113	3A	32420986	0.054779467	0.360824742	99	-0.031562053	0.01136411	0.106564707	1.124239572
M12437	6A	487727110	0.054789528	0.309278351	99	-0.031562053	0.011360472	0.108096314	1.157120845
M3412	2B	10931	0.05491951	0.134020619	99	-0.031562053	0.011313533	0.114621712	-1.325127223
M14023	6D	357593819	0.05494362	0.329896907	99	-0.031562053	0.01130484	0.106698135	1.127144356
M4155	2B	107028709	0.054995213	0.381443299	99	-0.031562053	0.01128625	0.136206179	1.843926074
M11133	5B	0	0.055007162	0.319587629	99	-0.031562053	0.011281948	0.09796546	-0.971005077
M14026	6D	78756505	0.055120018	0.350515464	99	-0.031562053	0.01124136	0.106575978	1.124602551
M5275	2B	792988297	0.055121531	0.216494845	99	-0.031562053	0.011240817	0.113735844	-1.30482504
M5968	2D	644662016	0.055211394	0.041237113	99	-0.031562053	0.011208564	0.143639991	2.052036149
M12832	6A	604445823	0.055313426	0.309278351	99	-0.031562053	0.011172011	0.143318533	2.042848169
M8162	3B	817331152	0.055329478	0.453608247	99	-0.031562053	0.011166267	0.097971469	0.948674608
M797	1B	247051054	0.055459427	0.391752577	99	-0.031562053	0.011119834	0.129853571	1.675075156
M8922	4A	651777951	0.055495503	0.195876289	99	-0.031562053	0.011106964	0.106163103	1.115953478
M11111	5B	531194944	0.055578884	0.463917526	99	-0.031562053	0.011077253	0.099698503	0.98290189
M1093	1B	180406792	0.055769074	0.309278351	99	-0.031562053	0.011009662	0.126244358	-1.604773465
M9175	4A	68843359	0.05578879	0.113402062	99	-0.031562053	0.011002669	0.130078791	1.681046517
M7869	3B	415899188	0.055865784	0.319587629	99	-0.031562053	0.010975388	0.130427447	-1.712107272
M9168	4A	706549986	0.055909313	0.443298969	99	-0.031562053	0.010959982	0.128960626	1.65212433
M836	1B	19772673	0.055946271	0.463917526	99	-0.031562053	0.010946911	0.096554321	0.921326787
M12114	6A	0	0.056053448	0.360824742	99	-0.031562053	0.010909061	0.096398213	0.918352482
M7805	3B	673217142	0.056210784	0.030927835	99	-0.031562053	0.010853639	0.152689102	2.320542554
M2577	2A	65525230	0.056246753	0.195876289	99	-0.031562053	0.010840992	0.103650841	1.063508687
M5110	2B	746974042	0.056372328	0.391752577	99	-0.031562053	0.010796908	0.095410274	0.899515133
M13189	6B	118196899	0.056377151	0.391752577	99	-0.031562053	0.010795217	0.115235385	1.31712419
M10443	5A	473115718	0.056496842	0.484536082	99	-0.031562053	0.010753301	0.112484701	1.254527493
M8896	4A	635530599	0.056617041	0.298969072	99	-0.031562053	0.010711303	0.099859606	-1.0079054
M14865	7A	675446847	0.056639301	0.24742268	99	-0.031562053	0.010703536	0.099756303	0.984428463
M4719	2B	717090293	0.056644353	0.257731959	99	-0.031562053	0.010701774	0.114716361	-1.326686122
M13562	6B	322479776	0.056820893	0.474226804	99	-0.031562053	0.010640297	0.109305366	-1.205406599
M125	1A	13728679	0.056831634	0.154639175	99	-0.031562053	0.010636563	0.1035361	-1.082608972
M3933	2B	657506318	0.056862219	0.360824742	99	-0.031562053	0.010625935	0.098899886	-0.988744678
M6705	3A	711688019	0.056864182	0.319587629	99	-0.031562053	0.010625253	0.10544724	-1.122537291
M9608	4B	637622767	0.056926651	0.226804124	99	-0.031562053	0.010603567	0.107138538	1.137263067
M2016	1D	13713162	0.056939285	0.391752577	99	-0.031562053	0.010599184	0.101119354	-1.033111565
M11181	5B	512799727	0.057008333	0.432989691	99	-0.031562053	0.010575249	0.11139208	1.230244296
M1871	1B	573243014	0.057013243	0.422680412	99	-0.031562053	0.010573549	0.112723271	-1.281227131
M1081	1B	85287651	0.057048643	0.175257732	99	-0.031562053	0.010561291	0.111533671	-1.254537258
M9545	4B	526943141	0.057089216	0.329896907	99	-0.031562053	0.010547252	0.11193572	1.2424133
M8956	4A	648906704	0.057168587	0.082474227	99	-0.031562053	0.010519819	0.116351032	1.343236445
M3809	2B	104940392	0.057365121	0.463917526	99	-0.031562053	0.010452069	0.114225791	-1.315205199
M15228	7B	566343875	0.057385405	0.298969072	99	-0.031562053	0.010445091	0.105840135	1.10976832
M4555	2B	559193945	0.057404371	0.082474227	99	-0.031562053	0.010438569	0.1264006	-1.608149744
M6565	3A	651997752	0.057444792	0.360824742	99	-0.031562053	0.010424676	0.108150243	1.159222835
M10266	5A	695616717	0.057577626	0.453608247	99	-0.031562053	0.010379095	0.111299343	-1.249133465
M1309	1B	462799871	0.057636845	0.103092784	99	-0.031562053	0.010358811	0.122518635	-1.511440392
M298	1A	27978274	0.05772997	0.463917526	99	-0.031562053	0.010326959	0.093706373	0.867761482
M9192	4A	705378018	0.057815313	0.463917526	99	-0.031562053	0.010297817	0.117181698	1.36285722
M8342	3D	37969599	0.057824733	0.154639175	99	-0.031562053	0.010294603	0.11757146	1.372010219
M12399	6A	38379225	0.057915147	0.350515464	99	-0.031562053	0.010263786	0.111283362	1.228134872
M4527	2B	547273650	0.057979654	0.237113402	99	-0.031562053	0.010241831	0.100425463	-1.018769201
M11200	5B	416173952	0.057982366	0.206185567	99	-0.031562053	0.010240909	0.103219014	-1.075657399
M2207	1D	475499558	0.058028815	0.268041237	99	-0.031562053	0.010225117	0.1199851	1.429417299
M8825	4A	537394269	0.058094511	0.371134021	99	-0.031562053	0.010202804	0.107214524	-1.159698225
M12801	6A	602970412	0.058134129	0.463917526	99	-0.031562053	0.010189362	0.101907708	1.028328737
M5174	2B	0	0.058200968	0.288659794	99	-0.031562053	0.010166707	0.094831851	-0.909474707
M698	1A	491804002	0.058364026	0.298969072	99	-0.031562053	0.010111554	0.104865269	1.089560914
M10346	5A	568046639	0.058379631	0.18556701	99	-0.031562053	0.010106285	0.107365222	1.142622803
M15490	7B	600657278	0.058398376	0.092783505	99	-0.031562053	0.010099957	0.123590601	1.517363707
M1424	1B	418720052	0.058414309	0.350515464	99	-0.031562053	0.01009458	0.092512179	-0.865944905
M12670	6A	478309953	0.058417297	0.381443299	99	-0.031562053	0.010093572	0.099103191	-0.992237811
M14495	7A	55362389	0.058459133	0.319587629	99	-0.031562053	0.010079462	0.093740617	-0.888809785
M1335	1B	366877298	0.058490282	0.175257732	99	-0.031562053	0.010068964	0.104220868	1.07612997
M15312	7B	162779025	0.058690042	0.082474227	99	-0.031562053	0.010001781	0.128288873	1.635801725
M13704	6B	708228121	0.058744689	0.072164948	99	-0.031562053	0.009983445	0.127695771	1.620637537
M14392	7A	29138301	0.058749297	0.18556701	99	-0.031562053	0.0099819	0.099793944	-1.005865035
M9360	4A	4344591	0.05880011	0.154639175	99	-0.031562053	0.009964869	0.122976907	1.502367102
M2994	2A	710105092	0.058828539	0.453608247	99	-0.031562053	0.009955347	0.102922229	-1.069253864
M11920	5D	363181276	0.058993893	0.051546392	99	-0.031562053	0.009900063	0.131170799	1.710677781
M8747	4A	571483237	0.05907772	0.494845361	99	-0.031562053	0.009872101	0.114652475	-1.324391094
M15540	7B	642273695	0.059150313	0.164948454	99	-0.031562053	0.00984792	0.105590717	-1.12478788
M5696	2D	712007919	0.059175329	0.195876289	99	-0.031562053	0.009839595	0.103786354	1.067321138
M8107	3B	295465304	0.05919712	0.432989691	99	-0.031562053	0.009832346	0.113602031	-1.300374487
M7945	3B	747096505	0.059271007	0.432989691	99	-0.031562053	0.009807788	0.118554487	-1.415324424
M2268	1D	95949764	0.059416471	0.268041237	99	-0.031562053	0.009759538	0.105040766	-1.113115796
M12438	6A	487727110	0.059500489	0.371134021	99	-0.031562053	0.009731727	0.100926879	1.008891773
M14354	7A	23895115	0.05953137	0.371134021	99	-0.031562053	0.009721516	0.137867375	1.891019801
M1930	1B	0	0.059649179	0.144329897	99	-0.031562053	0.009682613	0.1081678	-1.179709918
M5978	2D	0	0.059652478	0.175257732	99	-0.031562053	0.009681525	0.117868442	1.379615438
M1661	1B	606635803	0.05975585	0.474226804	99	-0.031562053	0.00964746	0.110608407	-1.233069422
M12976	6B	2439812	0.059766601	0.340206186	99	-0.031562053	0.009643921	0.095572634	0.903768915
M9159	4A	708532867	0.059854097	0.381443299	99	-0.031562053	0.009615143	0.15333742	-2.360851577
M14452	7A	609726833	0.059919547	0.360824742	99	-0.031562053	0.009593647	0.111478189	1.233145007
M10598	5B	20628549	0.059925216	0.164948454	99	-0.031562053	0.009591786	0.112666927	-1.278975425
M3569	2B	31382129	0.059932908	0.391752577	99	-0.031562053	0.009589261	0.1302806	-1.706892746
M8296	3D	17391691	0.059937185	0.350515464	99	-0.031562053	0.009587858	0.105325857	1.099765762
M13678	6B	705232815	0.059969889	0.432989691	99	-0.031562053	0.009577129	0.1157127	1.329365771
M2702	2A	510302235	0.06002577	0.381443299	99	-0.031562053	0.009558812	0.110489402	-1.230349602
M6576	3A	660003685	0.060055029	0.309278351	99	-0.031562053	0.009549228	0.106711612	-1.148286052
M5112	2B	450656765	0.060145367	0.463917526	99	-0.031562053	0.009519671	0.108081978	-1.177691072
M6232	3A	305876520	0.06017256	0.319587629	99	-0.031562053	0.009510783	0.146689824	-2.161301237
M8163	3B	14991361	0.060228123	0.412371134	99	-0.031562053	0.009492637	0.103884615	-1.088693959
M9156	4A	353560638	0.060287765	0.051546392	99	-0.031562053	0.009473178	0.151269587	-2.297721982
M3657	2B	58723204	0.060469488	0.443298969	99	-0.031562053	0.009414017	0.113461435	1.277935715
M5340	2B	22348080	0.06056819	0.113402062	99	-0.031562053	0.009381965	0.114068604	1.291782675
M15155	7A	729332254	0.060577066	0.340206186	99	-0.031562053	0.009379085	0.146737514	2.143810713
M4789	2B	601212198	0.060596413	0.463917526	99	-0.031562053	0.00937281	0.092036601	-0.856446408
M1298	1B	65947056	0.060724257	0.164948454	99	-0.031562053	0.009331399	0.111527526	1.234507505
M10493	5A	666108317	0.06084013	0.494845361	99	-0.031562053	0.009293947	0.104093819	-1.092846269
M7900	3B	752274170	0.060849569	0.371134021	99	-0.031562053	0.0092909	0.137780055	-1.907625252
M7949	3B	0	0.060849569	0.371134021	99	-0.031562053	0.0092909	0.137780055	-1.907625252
M34	1A	3982825	0.060865611	0.082474227	99	-0.031562053	0.009285722	0.116224903	1.341537087
M151	1A	31918043	0.06099248	0.474226804	99	-0.031562053	0.009244823	0.099603451	-1.001329572
M12766	6A	596176929	0.061023957	0.350515464	99	-0.031562053	0.00923469	0.113805956	-1.30441425
M8775	4A	584388334	0.061030443	0.082474227	99	-0.031562053	0.009232603	0.118670083	1.399026267
M7443	3B	161377797	0.061052661	0.402061856	99	-0.031562053	0.009225455	0.104549377	-1.102282674
M10910	5B	438017304	0.061066454	0.422680412	99	-0.031562053	0.009221019	0.10249722	1.041346985
M9105	4A	694752853	0.06132575	0.319587629	99	-0.031562053	0.009137824	0.13320155	1.765127471
M14604	7A	96563541	0.061330199	0.195876289	99	-0.031562053	0.0091364	0.114273562	1.296708291
M12669	6A	478309953	0.061337951	0.443298969	99	-0.031562053	0.009133919	0.105308857	1.099861627
M4641	2B	699287328	0.061432396	0.453608247	99	-0.031562053	0.009103717	0.116076572	1.338273337
M7311	3B	0	0.061442411	0.412371134	99	-0.031562053	0.009100518	0.120461206	-1.460190732
M1464	1B	557465111	0.061662113	0.237113402	99	-0.031562053	0.009030468	0.098294557	0.957151533
M284	1A	403145168	0.061737785	0.06185567	99	-0.031562053	0.009006404	0.12409386	1.530922198
M3585	2B	40530085	0.061757521	0.494845361	99	-0.031562053	0.009000133	0.096469826	-0.939642861
M8627	4A	428572127	0.061931839	0.453608247	99	-0.031562053	0.008944838	0.10223059	-1.05405419
M5872	2D	584857821	0.061991691	0.278350515	99	-0.031562053	0.008925892	0.111508309	-1.25233619
M2048	1D	10650564	0.062040409	0.391752577	99	-0.031562053	0.008910485	0.099999116	-1.008892814
M11110	5B	515186754	0.062099266	0.453608247	99	-0.031562053	0.008891888	0.10354468	-1.081041971
M14788	7A	89214940	0.062195128	0.18556701	99	-0.031562053	0.008861641	0.105923516	-1.130840771
M10385	5A	576581417	0.062251897	0.360824742	99	-0.031562053	0.008843752	0.093897664	-0.890520878
M2379	2A	5973684	0.062276856	0.288659794	99	-0.031562053	0.008835893	0.118997836	-1.4248844
M939	1B	171130928	0.062276942	0.226804124	99	-0.031562053	0.008835866	0.10922108	1.184088572
M11691	5B	634442505	0.062292903	0.453608247	99	-0.031562053	0.008830842	0.108694085	1.172609579
M3822	2B	100325164	0.062319225	0.453608247	99	-0.031562053	0.008822559	0.103440647	1.061174185
M6309	3A	0	0.062376983	0.195876289	99	-0.031562053	0.008804398	0.116858043	1.356775825
M1138	1B	220883994	0.062414757	0.257731959	99	-0.031562053	0.008792531	0.109455618	1.189260696
M9423	4A	1736032	0.062474878	0.432989691	99	-0.031562053	0.008773659	0.122239596	1.485478233
M494	1A	614826908	0.062537607	0.24742268	99	-0.031562053	0.008753989	0.098371021	-0.97643976
M2033	1D	21146599	0.062537939	0.402061856	99	-0.031562053	0.008753885	0.104753234	1.088570122
M3909	2B	976743	0.062684259	0.278350515	99	-0.031562053	0.008708087	0.118253556	-1.407098445
M1040	1B	186525506	0.062689506	0.412371134	99	-0.031562053	0.008706447	0.132692711	1.752029099
M9402	4A	740600613	0.062722967	0.484536082	99	-0.031562053	0.008695991	0.113818702	1.286773704
M7782	3B	722479438	0.062812729	0.206185567	99	-0.031562053	0.008667971	0.102852708	-1.066535918
M223	1A	379860792	0.062817299	0.24742268	99	-0.031562053	0.008666546	0.109037653	1.180254438
M6715	3A	579047670	0.062842507	0.381443299	99	-0.031562053	0.008658686	0.099873298	-1.006126251
M9749	4D	95663405	0.062880901	0.103092784	99	-0.031562053	0.00864672	0.1115438	-1.252848652
M4613	2B	91473909	0.06298317	0.164948454	99	-0.031562053	0.008614887	0.104724211	-1.105330931
M602	1A	566369413	0.063115625	0.432989691	99	-0.031562053	0.008573741	0.109955061	1.200437813
M9112	4A	701045215	0.063257975	0.092783505	99	-0.031562053	0.008529626	0.126411656	-1.606520311
M2342	2A	15958158	0.06347718	0.463917526	99	-0.031562053	0.008461902	0.097240632	-0.954035946
M8429	3D	18704148	0.063477741	0.474226804	99	-0.031562053	0.00846173	0.093945881	-0.891044586
M14625	7A	116530515	0.063506491	0.268041237	99	-0.031562053	0.008452866	0.097690684	-0.96279984
M14447	7A	82177106	0.063675794	0.298969072	99	-0.031562053	0.008400759	0.096139895	0.915887187
M15397	7B	522729143	0.063887507	0.432989691	99	-0.031562053	0.008335811	0.10514441	1.097198874
M2135	1D	537657357	0.063984095	0.24742268	99	-0.031562053	0.008306258	0.111788616	-1.257975734
M12755	6A	595659052	0.064037743	0.484536082	99	-0.031562053	0.008289864	0.108351723	-1.182299453
M166	1A	30239863	0.064108681	0.474226804	99	-0.031562053	0.00826821	0.090532265	-0.827877308
M9741	4D	16813358	0.064120506	0.257731959	99	-0.031562053	0.008264602	0.100840026	1.008606491
M13164	6B	93330869	0.064223312	0.371134021	99	-0.031562053	0.008233272	0.093083379	-0.874684817
M701	1B	3572450	0.064346357	0.371134021	99	-0.031562053	0.008195845	0.101215868	-1.032661042
M1851	1B	665113180	0.064390867	0.453608247	99	-0.031562053	0.008182326	0.097125859	0.935160914
M8261	3D	6060550	0.0643951	0.350515464	99	-0.031562053	0.008181041	0.102622146	-1.06131152
M6187	3A	312266867	0.064517805	0.432989691	99	-0.031562053	0.008143825	0.116836587	1.356934973
M8819	4A	144566764	0.064538858	0.412371134	99	-0.031562053	0.008137448	0.119740405	-1.4419139
M9398	4A	742001973	0.064559355	0.391752577	99	-0.031562053	0.008131241	0.101419873	1.020467827
M8355	3D	45029418	0.064616995	0.206185567	99	-0.031562053	0.008113798	0.111654849	-1.25479433
M8423	3D	452983655	0.064758415	0.453608247	99	-0.031562053	0.008071073	0.103726129	-1.083982061
M10374	5A	567502345	0.064760658	0.175257732	99	-0.031562053	0.008070396	0.111965138	-1.261689612
M3098	2A	744286377	0.064761656	0.402061856	99	-0.031562053	0.008070095	0.100353433	0.999011064
M12520	6A	435310101	0.06477942	0.041237113	99	-0.031562053	0.008064736	0.134997433	-1.830495417
M15279	7B	113767734	0.064802189	0.319587629	99	-0.031562053	0.008057869	0.104689359	-1.104044051
M8811	4A	0	0.064813327	0.484536082	99	-0.031562053	0.008054511	0.113705258	1.28483407
M10759	5B	383204555	0.065033309	0.175257732	99	-0.031562053	0.007988312	0.115677636	-1.346119866
M12750	6A	607396631	0.065164131	0.103092784	99	-0.031562053	0.00794906	0.114524683	1.303641238
M357	1A	497201654	0.065242917	0.113402062	99	-0.031562053	0.007925462	0.113671959	-1.300056878
M5686	2D	737641695	0.065440127	0.051546392	99	-0.031562053	0.007866528	0.132101251	1.737207512
M6687	3A	420562185	0.065454242	0.381443299	99	-0.031562053	0.007862318	0.106981041	1.136631997
M6750	3A	0	0.065503444	0.257731959	99	-0.031562053	0.007847648	0.099761975	0.987397527
M6808	3A	732737562	0.065743004	0.195876289	99	-0.031562053	0.007776393	0.0985648	0.963725589
M13168	6B	89695899	0.065869789	0.422680412	99	-0.031562053	0.007738796	0.128005949	1.630813515
M8793	4A	597887352	0.06612279	0.432989691	99	-0.031562053	0.007664005	0.101155786	-1.030913305
M10508	5A	680532072	0.066157983	0.206185567	99	-0.031562053	0.007653625	0.110910415	1.222458389
M10831	5B	37974769	0.066244826	0.154639175	99	-0.031562053	0.00762804	0.107612406	1.150414947
M15590	7B	648660809	0.066375788	0.092783505	99	-0.031562053	0.007589524	0.12495442	-1.568950226
M14479	7A	49592914	0.066385109	0.381443299	99	-0.031562053	0.007586786	0.133976035	-1.80254459
M5015	2B	765461493	0.066389271	0.484536082	99	-0.031562053	0.007585564	0.116820147	1.357109101
M13140	6B	78208497	0.066447596	0.175257732	99	-0.031562053	0.007568441	0.105265814	-1.115657607
M15404	7B	512354134	0.066482819	0.360824742	99	-0.031562053	0.007558108	0.153316673	2.343042104
M13152	6B	100895291	0.06650361	0.484536082	99	-0.031562053	0.007552012	0.101939906	-1.046726463
M14453	7A	38241544	0.066604671	0.350515464	99	-0.031562053	0.007522409	0.098053889	-0.96897892
M8492	3D	115087655	0.066672908	0.474226804	99	-0.031562053	0.007502448	0.106547493	-1.142739267
M14201	7A	556299936	0.06670655	0.268041237	99	-0.031562053	0.007492615	0.101803773	1.028908203
M3627	2B	419250140	0.066745461	0.402061856	99	-0.031562053	0.007481249	0.1329835	1.76097988
M11907	5D	254497566	0.066884199	0.175257732	99	-0.031562053	0.007440781	0.112167241	1.250708214
M118	1A	112441140	0.066921605	0.195876289	99	-0.031562053	0.007429887	0.097228655	0.937911242
M8274	3D	0	0.06715875	0.371134021	99	-0.031562053	0.007360968	0.097181708	0.937067474
M14079	6D	458025308	0.06723893	0.432989691	99	-0.031562053	0.007337726	0.095213552	0.899224324
M13102	6B	34162206	0.067493752	0.412371134	99	-0.031562053	0.00726406	0.131006952	-1.723546199
M9295	4A	312603570	0.067571713	0.474226804	99	-0.031562053	0.007241583	0.088558962	-0.791510563
M15292	7B	169497947	0.067643455	0.432989691	99	-0.031562053	0.007220923	0.115116117	1.317951114
M700	1A	590240846	0.067671961	0.051546392	99	-0.031562053	0.007212721	0.130154747	-1.701238538
M3500	2B	24690037	0.067675138	0.309278351	99	-0.031562053	0.007211807	0.105774032	-1.126026401
M7987	3B	604660614	0.06768673	0.360824742	99	-0.031562053	0.007208473	0.095286813	0.900749202
M12828	6A	455907336	0.067692728	0.278350515	99	-0.031562053	0.007206748	0.099056992	0.974022011
M3118	2A	742560803	0.067761163	0.381443299	99	-0.031562053	0.007187079	0.10208424	-1.049306285
M8419	3D	411004230	0.06794554	0.175257732	99	-0.031562053	0.007134194	0.11672002	1.355222113
M4675	2B	595508003	0.068138589	0.371134021	99	-0.031562053	0.007078988	0.097799315	0.949391611
M14755	7A	592045757	0.068140961	0.412371134	99	-0.031562053	0.00707831	0.123017922	-1.520419236
M2649	2A	598418775	0.068158651	0.412371134	99	-0.031562053	0.00707326	0.117091596	1.363970922
M6855	3A	745517190	0.068175411	0.12371134	99	-0.031562053	0.007068477	0.10940789	1.18994017
M7937	3B	754014085	0.068254811	0.402061856	99	-0.031562053	0.007045834	0.127714485	1.624053142
M15078	7A	712982088	0.068255248	0.371134021	99	-0.031562053	0.00704571	0.119915806	1.430934343
M8008	3B	493706157	0.068315384	0.072164948	99	-0.031562053	0.007028579	0.120173997	-1.451207524
M3128	2A	751913366	0.068315594	0.494845361	99	-0.031562053	0.007028519	0.103892892	1.072344785
M9404	4A	0	0.068432648	0.350515464	99	-0.031562053	0.006995223	0.091845066	0.836556398
M8241	3D	0	0.068505628	0.360824742	99	-0.031562053	0.006974494	0.103713595	1.068676487
M15384	7B	451187047	0.068637198	0.020618557	99	-0.031562053	0.006937185	0.172573459	2.971222686
M2140	1D	688816452	0.068637198	0.020618557	99	-0.031562053	0.006937185	0.172573459	2.971222686
M15430	7B	535456944	0.068637198	0.020618557	99	-0.031562053	0.006937185	0.172171005	-2.971222686
M9302	4A	0	0.068661477	0.402061856	99	-0.031562053	0.006930309	0.090466424	-0.825347692
M8413	3D	538560131	0.068675289	0.278350515	99	-0.031562053	0.006926398	0.09804846	-0.968276453
M5158	2B	782126877	0.068756225	0.226804124	99	-0.031562053	0.0069035	0.096335713	0.921153463
M8622	4A	127984307	0.068780209	0.474226804	99	-0.031562053	0.00689672	0.106148575	-1.133648713
M4546	2B	566996002	0.068831611	0.381443299	99	-0.031562053	0.006882198	0.107776916	-1.168468569
M14482	7A	49592914	0.068838644	0.051546392	99	-0.031562053	0.006880212	0.133277312	1.769403971
M82	1A	531630305	0.068863126	0.474226804	99	-0.031562053	0.006873301	0.105204413	-1.113670162
M6911	3B	3064404	0.068922439	0.402061856	99	-0.031562053	0.006856567	0.099050155	0.974236748
M8161	3B	817331152	0.068932022	0.422680412	99	-0.031562053	0.006853865	0.119841797	-1.443059492
M8999	4A	642951900	0.069011987	0.195876289	99	-0.031562053	0.006831333	0.098307229	-0.97326246
M9437	4B	2213400	0.069017382	0.381443299	99	-0.031562053	0.006829813	0.095258041	-0.91423926
M9260	4A	724783161	0.069039621	0.422680412	99	-0.031562053	0.006823553	0.096351836	0.921544081
M8395	3D	220863172	0.06929132	0.432989691	99	-0.031562053	0.006752846	0.097348887	0.940927739
M6300	3A	61285776	0.069373782	0.113402062	99	-0.031562053	0.006729742	0.114471236	-1.317096124
M8303	3D	17645869	0.069412174	0.298969072	99	-0.031562053	0.006718995	0.103606332	-1.080146188
M575	1A	45100852	0.069454277	0.298969072	99	-0.031562053	0.006707217	0.11091194	-1.236853059
M12095	6A	0	0.069519369	0.412371134	99	-0.031562053	0.006689024	0.120079114	1.435210342
M14673	7A	181697421	0.069528769	0.422680412	99	-0.031562053	0.006686398	0.090962451	-0.834103148
M12488	6A	358607782	0.069550475	0.072164948	99	-0.031562053	0.006680336	0.126617821	1.596526916
M1678	1B	599251551	0.069621465	0.360824742	99	-0.031562053	0.006660525	0.144269644	2.074712486
M5944	2D	695288450	0.06969553	0.494845361	99	-0.031562053	0.006639879	0.096080914	-0.929794075
M10675	5B	153502375	0.069782865	0.381443299	99	-0.031562053	0.006615565	0.10492136	1.094233613
M1613	1B	594764202	0.069852294	0.484536082	99	-0.031562053	0.006596259	0.106906186	1.136296991
M5689	2D	187627136	0.069870941	0.371134021	99	-0.031562053	0.006591078	0.137937173	1.896075297
M13475	6B	576042248	0.069954524	0.412371134	99	-0.031562053	0.006567871	0.104626265	1.088097659
M15237	7B	103401376	0.069957233	0.360824742	99	-0.031562053	0.00656712	0.09448921	-0.899388209
M3921	2B	46298185	0.070046525	0.072164948	99	-0.031562053	0.006542362	0.12329415	-1.526687107
M8626	4A	127984252	0.070124424	0.432989691	99	-0.031562053	0.006520791	0.109593926	-1.207603661
M5733	2D	584768696	0.070386412	0.288659794	99	-0.031562053	0.006448437	0.103317342	-1.073895742
M12006	5D	552916927	0.070551217	0.298969072	99	-0.031562053	0.006403072	0.098868755	0.971099992
M495	1A	115950191	0.070659064	0.494845361	99	-0.031562053	0.006373448	0.106418047	1.126106626
M1194	1B	0	0.070679223	0.381443299	99	-0.031562053	0.006367916	0.090581928	-0.826876476
M4572	2B	398349905	0.070708859	0.144329897	99	-0.031562053	0.006359786	0.104965348	-1.108132205
M12052	6A	0	0.07074399	0.134020619	99	-0.031562053	0.006350154	0.112676754	1.26325493
M7874	3B	743137062	0.070765764	0.041237113	99	-0.031562053	0.006344187	0.139503463	1.939777429
M5808	2D	601970973	0.070877778	0.072164948	99	-0.031562053	0.006313521	0.135904497	-1.853316752
M5567	2D	112927193	0.070973892	0.453608247	99	-0.031562053	0.00628725	0.092230832	0.844365378
M14249	7A	0	0.071019674	0.371134021	99	-0.031562053	0.00627475	0.090802359	0.818232092
M796	1B	30846941	0.071094847	0.381443299	99	-0.031562053	0.006254244	0.097402438	0.942469245
M11922	5D	363181276	0.071117553	0.041237113	99	-0.031562053	0.006248055	0.138247308	-1.917479878
M10456	5A	614889909	0.071118681	0.494845361	99	-0.031562053	0.006247748	0.103556172	1.066140335
M12774	6A	21988381	0.071139999	0.474226804	99	-0.031562053	0.006241939	0.107751153	-1.167273036
M1086	1B	67020984	0.071275135	0.06185567	99	-0.031562053	0.006205161	0.125271996	1.563102132
M1307	1B	578521082	0.071278984	0.484536082	99	-0.031562053	0.006204114	0.116479277	1.35053808
M1810	1B	653681729	0.071324722	0.082474227	99	-0.031562053	0.006191685	0.117503622	1.374518439
M8374	3D	108272571	0.071473451	0.206185567	99	-0.031562053	0.006151326	0.109896686	-1.213879487
M4758	2B	0	0.071504842	0.24742268	99	-0.031562053	0.006142819	0.098720665	-0.980719793
M1996	1D	8818793	0.071552554	0.371134021	99	-0.031562053	0.006129898	0.102784645	1.050338417
M2325	2A	3539454	0.071638693	0.371134021	99	-0.031562053	0.006106593	0.107228064	1.143679185
M13592	6B	675246263	0.071678514	0.082474227	99	-0.031562053	0.00609583	0.125738174	-1.587104682
M7413	3B	510300393	0.071696989	0.24742268	99	-0.031562053	0.006090839	0.096462003	-0.93658264
M10528	5A	509428185	0.071818268	0.103092784	99	-0.031562053	0.006058108	0.128041157	-1.645511892
M1882	1B	668913016	0.07182905	0.103092784	99	-0.031562053	0.006055201	0.118055035	-1.399754338
M148	1A	25807423	0.071878445	0.443298969	99	-0.031562053	0.00604189	0.092240771	0.844794095
M8748	4A	571483237	0.071939991	0.257731959	99	-0.031562053	0.006025318	0.09529033	-0.914050013
M13686	6B	707207597	0.072031314	0.278350515	99	-0.031562053	0.006000756	0.094731214	0.891399536
M11873	5B	345216433	0.072033992	0.226804124	99	-0.031562053	0.006000037	0.119888624	-1.443328264
M9111	4A	701045215	0.072057979	0.195876289	99	-0.031562053	0.005993591	0.113415503	-1.292301233
M8428	3D	446942046	0.072075545	0.474226804	99	-0.031562053	0.005988873	0.10442172	-1.096378429
M4089	2B	436537228	0.072121729	0.494845361	99	-0.031562053	0.005976473	0.105704554	-1.123321751
M14494	7A	50364370	0.072151982	0.030927835	99	-0.031562053	0.005968355	0.151419334	-2.29874982
M7873	3B	743137062	0.072151982	0.030927835	99	-0.031562053	0.005968355	0.151419334	-2.29874982
M7888	3B	750359764	0.072151982	0.030927835	99	-0.031562053	0.005968355	0.151419334	-2.29874982
M8328	3D	38148388	0.072151982	0.030927835	99	-0.031562053	0.005968355	0.151419334	-2.29874982
M3745	2B	71304332	0.072230971	0.402061856	99	-0.031562053	0.005947177	0.125519114	-1.581451967
M1785	1B	646178482	0.072366188	0.268041237	99	-0.031562053	0.005910982	0.094426537	0.885726112
M2948	2A	691845663	0.072371275	0.432989691	99	-0.031562053	0.005909622	0.11058592	1.217014948
M6472	3A	556260082	0.072393884	0.443298969	99	-0.031562053	0.005903577	0.109684227	1.197159385
M13087	6B	11764484	0.072438785	0.082474227	99	-0.031562053	0.00589158	0.11834275	-1.406392226
M5911	2D	470884866	0.072501476	0.216494845	99	-0.031562053	0.005874842	0.098608688	-0.978242178
M3708	2B	293132103	0.072531876	0.154639175	99	-0.031562053	0.005866731	0.107201398	-1.155080706
M9279	4A	724234050	0.072534586	0.103092784	99	-0.031562053	0.005866008	0.111858192	-1.257091524
M7703	3B	674678098	0.072613625	0.103092784	99	-0.031562053	0.005844939	0.11796815	1.385803493
M10662	5B	71300457	0.072686598	0.195876289	99	-0.031562053	0.005825508	0.107136068	-1.153639212
M10816	5B	418317035	0.072734094	0.402061856	99	-0.031562053	0.005812873	0.129541242	1.672280461
M342	1A	0	0.07278194	0.030927835	99	-0.031562053	0.005800154	0.144330996	-2.088943803
M8358	3D	48269637	0.072856009	0.350515464	99	-0.031562053	0.005780482	0.10247548	1.044341924
M135	1A	20866783	0.072965321	0.381443299	99	-0.031562053	0.005751489	0.093030085	-0.871211151
M3396	2B	8311033	0.072965803	0.422680412	99	-0.031562053	0.005751361	0.097017905	0.935496036
M6083	3A	15780588	0.072980051	0.092783505	99	-0.031562053	0.005747586	0.120533442	1.447083468
M4240	2B	694912630	0.073051214	0.371134021	99	-0.031562053	0.005728741	0.123162509	-1.52262911
M454	1A	537889263	0.073059143	0.175257732	99	-0.031562053	0.005726642	0.116004703	-1.351435746
M9083	4A	690887990	0.073134966	0.082474227	99	-0.031562053	0.005706588	0.114420392	1.303496029
M10367	5A	689204261	0.073194437	0.257731959	99	-0.031562053	0.005690874	0.09560716	0.908382033
M7485	3B	495521725	0.073287544	0.051546392	99	-0.031562053	0.005666301	0.127356927	1.616312388
M15358	7B	243258677	0.07336148	0.144329897	99	-0.031562053	0.005646812	0.103135164	-1.069333015
M11079	5B	505694656	0.073379042	0.288659794	99	-0.031562053	0.005642185	0.107522448	-1.161749876
M11227	5B	506961125	0.073390922	0.494845361	99	-0.031562053	0.005639057	0.098837246	-0.982519179
M8597	4A	5349362	0.073407354	0.432989691	99	-0.031562053	0.00563473	0.109976832	-1.215125086
M5402	2D	319705897	0.073478773	0.319587629	99	-0.031562053	0.005615937	0.108964764	1.181716035
M7928	3B	402859187	0.073495487	0.391752577	99	-0.031562053	0.005611542	0.106362159	1.125679336
M3737	2B	44609696	0.073569263	0.010309278	99	-0.031562053	0.005592155	0.185633622	3.440391995
M5107	2B	0	0.073569263	0.010309278	99	-0.031562053	0.005592155	0.18533213	-3.440391995
M10990	5B	584276433	0.073578034	0.309278351	99	-0.031562053	0.005589852	0.099612979	0.986684717
M3919	2B	158649496	0.073598646	0.453608247	99	-0.031562053	0.00558444	0.115335493	-1.33581204
M9985	5A	72230055	0.073727172	0.175257732	99	-0.031562053	0.005550731	0.105299805	1.103254153
M11016	5B	485806429	0.073739736	0.134020619	99	-0.031562053	0.005547439	0.108932676	1.181085345
M6337	3A	345660743	0.073819708	0.422680412	99	-0.031562053	0.0055265	0.119668672	-1.4375856
M7943	3B	677368097	0.07382294	0.422680412	99	-0.031562053	0.005525655	0.119546355	1.423607433
M5814	2D	593032041	0.073863264	0.381443299	99	-0.031562053	0.005515107	0.097590692	0.946879219
M14689	7A	127293948	0.073979161	0.494845361	99	-0.031562053	0.005484826	0.092444167	-0.860077223
M7967	3B	760963408	0.073981857	0.494845361	99	-0.031562053	0.005484122	0.119517136	1.422950461
M15035	7A	623842854	0.074028652	0.164948454	99	-0.031562053	0.005471911	0.111486467	1.237451326
M13650	6B	693132833	0.074099512	0.463917526	99	-0.031562053	0.005453436	0.091919894	-0.850380131
M8189	3B	0	0.074116795	0.164948454	99	-0.031562053	0.005448933	0.104817952	1.093231372
M7531	3B	550313136	0.07416507	0.412371134	99	-0.031562053	0.005436361	0.097915828	0.953314569
M11790	5B	687326007	0.074225231	0.195876289	99	-0.031562053	0.005420705	0.099372637	0.982071385
M7089	3B	22917259	0.074262482	0.103092784	99	-0.031562053	0.005411019	0.117639757	1.378500231
M8649	4A	303362512	0.074318302	0.226804124	99	-0.031562053	0.005396514	0.102956333	-1.06539717
M11097	5B	592513263	0.074442349	0.041237113	99	-0.031562053	0.005364321	0.144203056	2.074087821
M12704	6A	696240009	0.074610086	0.144329897	99	-0.031562053	0.005320884	0.110794432	-1.232861507
M7761	3B	103111486	0.074687841	0.298969072	99	-0.031562053	0.005300785	0.111712829	1.242674824
M2080	1D	40222148	0.074711723	0.360824742	99	-0.031562053	0.005294616	0.106132472	-1.131704774
M2122	1D	4811197	0.074723612	0.195876289	99	-0.031562053	0.005291546	0.110113235	-1.217784002
M11380	5B	719383797	0.074750279	0.134020619	99	-0.031562053	0.005284662	0.104089183	1.078171138
M13724	6B	462318879	0.074751702	0.422680412	99	-0.031562053	0.005284295	0.09149977	0.8319365
M9244	4A	719933935	0.074817146	0.402061856	99	-0.031562053	0.005267411	0.095066649	0.898499367
M10203	5A	503872965	0.074831045	0.484536082	99	-0.031562053	0.005263827	0.111555159	1.239191515
M6723	3A	715199344	0.074958709	0.422680412	99	-0.031562053	0.005230945	0.106662789	1.132464105
M13144	6B	29496320	0.07503342	0.278350515	99	-0.031562053	0.005211731	0.098730793	-0.979988672
M9833	5A	407251142	0.075146041	0.391752577	99	-0.031562053	0.005182805	0.097826327	0.951816216
M11061	5B	189721298	0.075256064	0.340206186	99	-0.031562053	0.005154593	0.11056274	-1.227566533
M8618	4A	134069682	0.075307361	0.309278351	99	-0.031562053	0.005141455	0.112741531	1.26592383
M8928	4A	659678759	0.075307361	0.309278351	99	-0.031562053	0.005141455	0.112741531	1.26592383
M3695	2B	69066012	0.075312345	0.278350515	99	-0.031562053	0.005140179	0.099445456	-0.99408006
M2935	2A	507377226	0.075327805	0.371134021	99	-0.031562053	0.005136221	0.141214234	1.989009755
M12222	6A	13902305	0.075329761	0.226804124	99	-0.031562053	0.005135721	0.112959639	1.27085228
M5820	2D	606705458	0.075403995	0.268041237	99	-0.031562053	0.005116731	0.092791537	0.855910203
M6873	3A	739791338	0.075444642	0.412371134	99	-0.031562053	0.005106342	0.12095383	1.457876553
M12922	6A	75252575	0.075460013	0.474226804	99	-0.031562053	0.005102415	0.104861613	-1.104698212
M13282	6B	205810313	0.075507916	0.402061856	99	-0.031562053	0.005090182	0.095311347	0.903335102
M10400	5A	581488583	0.075538354	0.206185567	99	-0.031562053	0.005082413	0.10535116	1.104804271
M1084	1B	0	0.075555726	0.082474227	99	-0.031562053	0.005077981	0.115325444	-1.335073781
M10449	5A	618306850	0.075592867	0.412371134	99	-0.031562053	0.005068509	0.12844251	-1.654816353
M3	1A	6341226	0.075672099	0.298969072	99	-0.031562053	0.005048318	0.09496437	-0.906871479
M12674	6A	125507757	0.075701018	0.195876289	99	-0.031562053	0.005040955	0.098581777	0.966795722
M9816	4D	507006414	0.075770367	0.030927835	99	-0.031562053	0.005023309	0.137983627	1.898924818
M11174	5B	46577932	0.07581553	0.381443299	99	-0.031562053	0.005011827	0.096133564	-0.929178043
M9891	5A	31132290	0.075979094	0.257731959	99	-0.031562053	0.004970306	0.093219311	-0.873954293
M10761	5B	383155097	0.076042036	0.463917526	99	-0.031562053	0.004954354	0.115784186	-1.345552137
M4726	2B	721110923	0.076055085	0.443298969	99	-0.031562053	0.004951049	0.096517108	-0.936506261
M2829	2A	579584012	0.076062986	0.319587629	99	-0.031562053	0.004949048	0.093157614	-0.872783143
M9230	4A	14039828	0.076085944	0.484536082	99	-0.031562053	0.004943235	0.086619237	-0.755232458
M14467	7A	60679438	0.076095269	0.030927835	99	-0.031562053	0.004940874	0.146677062	2.146475187
M1461	1B	543486036	0.076272255	0.24742268	99	-0.031562053	0.00489613	0.096225675	0.921041917
M7533	3B	488191801	0.076328716	0.113402062	99	-0.031562053	0.00488188	0.104433726	-1.095522196
M10909	5B	438017304	0.076449803	0.226804124	99	-0.031562053	0.004851358	0.100388554	1.002934814
M10324	5A	164201064	0.076524077	0.24742268	99	-0.031562053	0.004832663	0.094046337	0.879638688
M12826	6A	605151507	0.076666214	0.371134021	99	-0.031562053	0.00479694	0.095114688	0.899883443
M8292	3D	14141517	0.076678791	0.350515464	99	-0.031562053	0.004793782	0.101441447	1.024242937
M8237	3B	825858454	0.076773968	0.329896907	99	-0.031562053	0.004769907	0.098713499	-0.979205396
M14175	7A	8931851	0.076810398	0.402061856	99	-0.031562053	0.004760777	0.09579251	0.912859727
M4197	2B	151482156	0.076863932	0.474226804	99	-0.031562053	0.004747369	0.103578045	-1.077588517
M4944	2B	751539866	0.076898206	0.360824742	99	-0.031562053	0.00473879	0.097338296	-0.952213174
M10373	5A	567502345	0.076899177	0.494845361	99	-0.031562053	0.004738547	0.111976127	-1.258603843
M113	1A	12427365	0.076972251	0.237113402	99	-0.031562053	0.00472027	0.097663366	0.949093042
M7478	3B	311762515	0.077158474	0.432989691	99	-0.031562053	0.00467378	0.110400057	1.214143476
M3301	2A	0	0.077299218	0.412371134	99	-0.031562053	0.004638725	0.097016357	0.93657863
M10358	5A	513747652	0.07737295	0.237113402	99	-0.031562053	0.004620388	0.093989133	-0.888016092
M4447	2B	594205815	0.077550646	0.206185567	99	-0.031562053	0.004576275	0.102264362	1.041223702
M6625	3A	547633302	0.077560034	0.06185567	99	-0.031562053	0.004573948	0.129875944	1.682202127
M3509	2B	0	0.077578171	0.257731959	99	-0.031562053	0.004569452	0.10726605	-1.155169993
M5246	2B	796600262	0.077593868	0.051546392	99	-0.031562053	0.004565562	0.131040135	-1.721717267
M5288	2B	0	0.077593868	0.051546392	99	-0.031562053	0.004565562	0.131040135	-1.721717267
M11705	5B	656933443	0.077698145	0.329896907	99	-0.031562053	0.004539742	0.100290315	-1.010354466
M10927	5B	560802404	0.077732593	0.340206186	99	-0.031562053	0.004531221	0.098021751	0.956295152
M8228	3B	28789197	0.077740087	0.340206186	99	-0.031562053	0.004529368	0.101129467	-1.027246273
M8980	4A	676492514	0.077781928	0.195876289	99	-0.031562053	0.004519025	0.106334985	-1.135231924
M9746	4D	95663405	0.077838221	0.195876289	99	-0.031562053	0.004505118	0.109807297	-1.210269371
M14557	7A	80428679	0.0778587	0.082474227	99	-0.031562053	0.004500062	0.113854482	-1.300784366
M13742	6B	0	0.077937472	0.309278351	99	-0.031562053	0.004480626	0.09236703	0.848686194
M32	1A	7078505	0.077945489	0.072164948	99	-0.031562053	0.00447865	0.122258092	1.490225456
M15261	7B	71271240	0.077955126	0.082474227	99	-0.031562053	0.004476274	0.121386771	-1.477951102
M8553	4A	6919003	0.078179557	0.494845361	99	-0.031562053	0.004421031	0.103359087	-1.072731124
M849	1B	207966086	0.07824013	0.422680412	99	-0.031562053	0.004406151	0.106490152	-1.138421408
M8345	3D	39898072	0.078353989	0.391752577	99	-0.031562053	0.004378215	0.101465417	1.025144862
M14487	7A	50010206	0.078412059	0.298969072	99	-0.031562053	0.004363985	0.112153361	1.253473646
M7280	3B	0	0.078429036	0.319587629	99	-0.031562053	0.004359827	0.143530236	-2.064452688
M1884	1B	480971976	0.078438331	0.432989691	99	-0.031562053	0.00435755	0.111000196	1.227746811
M9802	4D	675631336	0.078448325	0.164948454	99	-0.031562053	0.004355103	0.106352822	1.126737171
M10550	5B	17888082	0.078482696	0.432989691	99	-0.031562053	0.00434669	0.098313299	0.962203783
M4628	2B	689711741	0.078502455	0.412371134	99	-0.031562053	0.004341855	0.094556068	-0.898426847
M11906	5D	287429698	0.078516714	0.164948454	99	-0.031562053	0.004338367	0.101201438	-1.028511473
M9195	4A	135164375	0.078562067	0.453608247	99	-0.031562053	0.004327277	0.122838227	1.504595713
M4842	2B	601567299	0.078651707	0.226804124	99	-0.031562053	0.004305379	0.101061073	-1.025639428
M11724	5B	233418958	0.078668972	0.371134021	99	-0.031562053	0.004301164	0.094224996	-0.892136152
M15506	7B	0	0.07876355	0.309278351	99	-0.031562053	0.004278094	0.103036721	-1.065934686
M9761	4D	347481014	0.078776725	0.226804124	99	-0.031562053	0.004274883	0.103005988	-1.065298234
M8016	3B	10930676	0.078780735	0.288659794	99	-0.031562053	0.004273906	0.10680424	-1.14498848
M3447	2B	0	0.078809027	0.474226804	99	-0.031562053	0.004267012	0.095744048	0.912425254
M1446	1B	406770303	0.079027629	0.06185567	99	-0.031562053	0.004213839	0.122023935	1.484770241
M13697	6B	713822686	0.079053179	0.226804124	99	-0.031562053	0.004207635	0.101277176	-1.029914263
M13165	6B	109155311	0.079165322	0.391752577	99	-0.031562053	0.004180429	0.098357379	0.963236966
M8675	4A	232125986	0.079184342	0.360824742	99	-0.031562053	0.00417582	0.110043103	-1.215124271
M12492	6A	440255570	0.079187372	0.371134021	99	-0.031562053	0.004175085	0.100649997	1.008867098
M4364	2B	540660555	0.079326253	0.463917526	99	-0.031562053	0.004141462	0.092316358	-0.856372466
M4146	2B	184403011	0.079333554	0.164948454	99	-0.031562053	0.004139696	0.115174176	1.322369385
M14948	7A	704615462	0.079359054	0.443298969	99	-0.031562053	0.00413353	0.107320397	1.147633237
M13609	6B	450081157	0.079412675	0.402061856	99	-0.031562053	0.004120571	0.091837356	-0.84753056
M13413	6B	392948564	0.079452341	0.278350515	99	-0.031562053	0.004110991	0.094716916	-0.901240417
M10261	5A	514279828	0.079603017	0.494845361	99	-0.031562053	0.004074648	0.099413364	-0.992376338
M12713	6A	583292509	0.07968907	0.494845361	99	-0.031562053	0.004053926	0.099953292	-1.003119983
M2407	2A	9684465	0.079712312	0.463917526	99	-0.031562053	0.004048334	0.129089591	1.662363912
M7572	3B	364670841	0.07979276	0.371134021	99	-0.031562053	0.00402899	0.095803501	0.913802099
M11260	5B	635769576	0.079912701	0.041237113	99	-0.031562053	0.004000189	0.13337438	1.774872339
M6090	3A	8191493	0.079917668	0.494845361	99	-0.031562053	0.003998997	0.107214817	-1.153500689
M10551	5B	713387538	0.080154407	0.484536082	99	-0.031562053	0.003942293	0.114820911	-1.322326448
M8779	4A	596830631	0.080232751	0.164948454	99	-0.031562053	0.003923569	0.101951037	-1.043324964
M12101	6A	11577996	0.080646466	0.371134021	99	-0.031562053	0.00382502	0.134959464	1.817580682
M9009	4A	659089834	0.080646475	0.494845361	99	-0.031562053	0.003825018	0.090905042	0.822547657
M3112	2A	748451453	0.08072958	0.474226804	99	-0.031562053	0.003805289	0.090267621	0.811019058
M6569	3A	655669363	0.080817689	0.371134021	99	-0.031562053	0.003784396	0.101874903	-1.041633983
M2041	1D	44652596	0.080851471	0.453608247	99	-0.031562053	0.003776392	0.103814376	1.073966074
M13722	6B	462318879	0.080856679	0.134020619	99	-0.031562053	0.003775158	0.1078567	-1.167081924
M3996	2B	0	0.080895272	0.443298969	99	-0.031562053	0.00376602	0.099237686	-0.988577856
M8259	3D	0	0.080910999	0.360824742	99	-0.031562053	0.003762297	0.102143195	-1.047085516
M2286	1D	0	0.081010024	0.474226804	99	-0.031562053	0.003738875	0.101827027	1.033135464
M9801	4D	675631336	0.081037214	0.494845361	99	-0.031562053	0.003732449	0.105613978	1.111698793
M13078	6B	0	0.081049007	0.319587629	99	-0.031562053	0.003729663	0.097888443	-0.961944385
M4247	2B	483838235	0.081318963	0.278350515	99	-0.031562053	0.003666005	0.134978073	-1.825574026
M5909	2D	615707186	0.081534197	0.391752577	99	-0.031562053	0.003615416	0.135848474	-1.849096207
M8732	4A	521608777	0.081539337	0.051546392	99	-0.031562053	0.00361421	0.121592692	1.474864056
M1944	1B	683478219	0.081556385	0.350515464	99	-0.031562053	0.003610209	0.108975585	1.183957609
M3869	2B	106962921	0.0815621	0.371134021	99	-0.031562053	0.003608869	0.093115651	0.863443583
M10715	5B	75319717	0.081564196	0.18556701	99	-0.031562053	0.003608377	0.102434833	-1.052897873
M12717	6A	344058238	0.081758769	0.463917526	99	-0.031562053	0.003562789	0.111323518	-1.242855364
M13840	6B	720519099	0.081766725	0.020618557	99	-0.031562053	0.003560927	0.151607602	2.294925586
M4676	2B	595508003	0.081795552	0.484536082	99	-0.031562053	0.003554184	0.091811961	-0.846497805
M14099	6D	463549451	0.081832377	0.402061856	99	-0.031562053	0.003545574	0.10593899	1.118761386
M803	1B	19233594	0.081887866	0.350515464	99	-0.031562053	0.003532607	0.167396564	2.798628346
M911	1B	137436650	0.081887866	0.350515464	99	-0.031562053	0.003532607	0.167185398	-2.798628346
M10653	5B	48874275	0.081953023	0.134020619	99	-0.031562053	0.003517394	0.1146085	1.309993438
M8446	3D	728753357	0.081962467	0.474226804	99	-0.031562053	0.00351519	0.112652897	1.265552333
M725	1B	3164636	0.082019913	0.195876289	99	-0.031562053	0.00350179	0.106046686	-1.128091761
M12409	6A	42803388	0.082030127	0.443298969	99	-0.031562053	0.003499408	0.117445291	-1.382839041
M3230	2A	760131926	0.082051899	0.402061856	99	-0.031562053	0.003494333	0.103404732	-1.07274819
M419	1A	235956432	0.082206725	0.391752577	99	-0.031562053	0.003458284	0.095376249	-0.913121176
M10643	5B	72083499	0.082208249	0.226804124	99	-0.031562053	0.00345793	0.096078035	-0.926556805
M8949	4A	555354979	0.082253306	0.484536082	99	-0.031562053	0.003447453	0.09544541	-0.914430089
M7854	3B	302427239	0.082356778	0.072164948	99	-0.031562053	0.003423418	0.12266182	1.501168782
M6170	3A	21325529	0.082372008	0.051546392	99	-0.031562053	0.003419883	0.149836946	-2.248530928
M987	1B	577431009	0.082408126	0.195876289	99	-0.031562053	0.003411503	0.097286442	-0.949876686
M12260	6A	16376378	0.082436663	0.092783505	99	-0.031562053	0.003404884	0.126477555	-1.603062081
M4448	2B	594205815	0.082467756	0.268041237	99	-0.031562053	0.003397676	0.097888382	-0.961611206
M1003	1B	95344234	0.082485784	0.443298969	99	-0.031562053	0.003393498	0.090577072	-0.8238141
M7930	3B	728890034	0.082487001	0.18556701	99	-0.031562053	0.003393215	0.103886625	1.075849869
M10611	5B	316546278	0.082496554	0.494845361	99	-0.031562053	0.003391002	0.107712151	1.156799755
M7866	3B	736466529	0.082519665	0.051546392	99	-0.031562053	0.003385648	0.126239528	1.590256204
M9767	4D	401082716	0.082870493	0.18556701	99	-0.031562053	0.003304576	0.095834951	-0.921738364
M7299	3B	19380506	0.082887459	0.010309278	99	-0.031562053	0.003300665	0.173312714	-3.007030338
M20	1A	1669927	0.082917698	0.206185567	99	-0.031562053	0.003293697	0.099224272	0.981251918
M60	1A	150793813	0.083069129	0.288659794	99	-0.031562053	0.003258841	0.101418198	-1.03182392
M14820	7A	636900029	0.083075032	0.18556701	99	-0.031562053	0.003257484	0.100550373	-1.014295228
M3830	2B	122927423	0.083113808	0.18556701	99	-0.031562053	0.00324857	0.107542617	-1.159790026
M14466	7A	115267867	0.083144527	0.463917526	99	-0.031562053	0.003241512	0.109461682	-1.201427493
M126	1A	13728679	0.083259833	0.453608247	99	-0.031562053	0.003215045	0.101420454	-1.031825901
M8368	3D	11455013	0.08330866	0.432989691	99	-0.031562053	0.003203849	0.10623928	-1.131882316
M13715	6B	0	0.083356161	0.453608247	99	-0.031562053	0.003192964	0.108485183	-1.18009645
M7697	3B	669426645	0.083380741	0.422680412	99	-0.031562053	0.003187335	0.094820354	-0.902277285
M10604	5B	369428012	0.083395452	0.237113402	99	-0.031562053	0.003183966	0.100920426	-1.021677201
M4599	2B	550996028	0.083480761	0.226804124	99	-0.031562053	0.003164445	0.097675699	0.950889773
M115	1A	13940751	0.083526452	0.257731959	99	-0.031562053	0.003153999	0.096320996	0.924619427
M14949	7A	430047444	0.083545326	0.453608247	99	-0.031562053	0.003149685	0.112315355	-1.264623581
M94	1A	10241942	0.083594939	0.298969072	99	-0.031562053	0.003138352	0.087751329	-0.773167921
M7942	3B	686347767	0.083861523	0.432989691	99	-0.031562053	0.003077582	0.113622958	1.287940085
M3932	2B	154602689	0.083871914	0.412371134	99	-0.031562053	0.003075218	0.106959234	1.140952558
M648	1A	584104138	0.083901484	0.309278351	99	-0.031562053	0.003068492	0.08664013	-0.753719704
M1783	1B	557155175	0.084053004	0.422680412	99	-0.031562053	0.003034064	0.09759257	0.949396914
M13914	6D	13168925	0.084322819	0.494845361	99	-0.031562053	0.002972926	0.10160447	-1.035319758
M15013	7A	704330351	0.084395591	0.226804124	99	-0.031562053	0.002956474	0.103998822	1.07861902
M7718	3B	0	0.084399459	0.175257732	99	-0.031562053	0.0029556	0.099755655	0.992163476
M13439	6B	568869850	0.084438267	0.360824742	99	-0.031562053	0.002946833	0.088787233	0.785370442
M121	1A	21638580	0.084610505	0.494845361	99	-0.031562053	0.002907976	0.101854311	1.034522084
M1325	1B	16677697	0.08465216	0.113402062	99	-0.031562053	0.002898592	0.112201367	1.256016081
M3693	2B	68579934	0.084675871	0.319587629	99	-0.031562053	0.002893252	0.113521597	1.285822055
M10356	5A	567120913	0.084749576	0.175257732	99	-0.031562053	0.002876665	0.106312131	1.12735026
M8845	4A	618529609	0.08475799	0.298969072	99	-0.031562053	0.002874772	0.124471802	1.546448179
M8110	3B	42103334	0.084765453	0.103092784	99	-0.031562053	0.002873094	0.108044254	1.164482995
M8441	3D	524197814	0.084891353	0.432989691	99	-0.031562053	0.002844803	0.091903145	-0.84746361
M10433	5A	490330792	0.08495506	0.494845361	99	-0.031562053	0.002830505	0.104072595	-1.085941005
M5334	2B	403182706	0.085078012	0.360824742	99	-0.031562053	0.002802944	0.118391555	1.398853077
M7014	3B	579518208	0.085097911	0.360824742	99	-0.031562053	0.002798487	0.099457948	-0.99198682
M9174	4A	708514620	0.085185864	0.164948454	99	-0.031562053	0.002778803	0.105073168	1.101258251
M65	1A	542326485	0.085241163	0.402061856	99	-0.031562053	0.002766438	0.088208886	-0.780847191
M8966	4A	328716746	0.085355548	0.164948454	99	-0.031562053	0.002740891	0.108230669	-1.174128663
M5678	2D	547955524	0.085356515	0.134020619	99	-0.031562053	0.002740675	0.109353416	-1.198557635
M3177	2A	758417987	0.085384292	0.402061856	99	-0.031562053	0.002734477	0.095901629	0.916977772
M8599	4A	4240767	0.085409039	0.134020619	99	-0.031562053	0.002728956	0.109903253	-1.21060146
M8856	4A	483683726	0.085444567	0.474226804	99	-0.031562053	0.002721034	0.088617769	0.782589859
M383	1A	504702998	0.085469657	0.268041237	99	-0.031562053	0.002715442	0.107287357	-1.153773136
M395	1A	504090014	0.085469657	0.268041237	99	-0.031562053	0.002715442	0.107540159	1.153773136
M4695	2B	712830783	0.085501924	0.278350515	99	-0.031562053	0.002708252	0.100341278	1.004128949
M9242	4A	10725909	0.085522938	0.494845361	99	-0.031562053	0.002703572	0.100531357	1.007951792
M823	1B	16427758	0.085569552	0.360824742	99	-0.031562053	0.002693194	0.102924017	-1.062028527
M5031	2B	562205678	0.085575609	0.484536082	99	-0.031562053	0.002691846	0.092026896	0.844203121
M8938	4A	684963131	0.08563019	0.309278351	99	-0.031562053	0.002679703	0.09588404	-0.922054617
M10318	5A	561511768	0.085648416	0.381443299	99	-0.031562053	0.00267565	0.088375992	0.778355945
M12818	6A	0	0.085732761	0.484536082	99	-0.031562053	0.002656906	0.104762211	-1.100168982
M5000	2B	0	0.085772689	0.463917526	99	-0.031562053	0.00264804	0.102589294	1.049808285
M1918	1B	679383844	0.085860347	0.298969072	99	-0.031562053	0.002628592	0.147022813	-2.164199357
M283	1A	403145168	0.085860347	0.298969072	99	-0.031562053	0.002628592	0.147022813	-2.164199357
M6009	2D	761851219	0.085860347	0.298969072	99	-0.031562053	0.002628592	0.147201493	2.164199357
M4773	2B	732350878	0.086025595	0.432989691	99	-0.031562053	0.002591988	0.112171115	1.255643908
M8648	4A	335898876	0.086041915	0.216494845	99	-0.031562053	0.002588377	0.105183076	-1.108936328
M9715	4D	705550759	0.086066602	0.381443299	99	-0.031562053	0.002582917	0.10265054	1.051130413
M13640	6B	696194020	0.086103902	0.443298969	99	-0.031562053	0.002574669	0.090484364	-0.821316682
M1537	1B	568960943	0.086113478	0.391752577	99	-0.031562053	0.002572553	0.089536255	-0.804246647
M14757	7A	585063469	0.086161808	0.195876289	99	-0.031562053	0.002561874	0.096694262	-0.937539907
M784	1B	530442292	0.086311814	0.041237113	99	-0.031562053	0.002528771	0.136399121	-1.863000794
M3488	2B	19415866	0.086377493	0.237113402	99	-0.031562053	0.002514297	0.100387015	-1.010269569
M14904	7A	705856368	0.086421397	0.371134021	99	-0.031562053	0.002504629	0.131847669	-1.740885403
M11902	5D	175947785	0.086478383	0.278350515	99	-0.031562053	0.002492087	0.111073319	-1.236220305
M2654	2A	85591214	0.086666272	0.082474227	99	-0.031562053	0.002450801	0.120744301	-1.460369417
M6014	2D	0	0.086743217	0.092783505	99	-0.031562053	0.002433922	0.108468379	1.174105
M12194	6A	150550559	0.08677908	0.18556701	99	-0.031562053	0.00242606	0.100520337	-1.012859876
M3312	2A	15352962	0.086880406	0.257731959	99	-0.031562053	0.002403868	0.095287362	-0.910372009
M4019	2B	678547100	0.086916953	0.268041237	99	-0.031562053	0.00239587	0.092543245	-0.858821092
M4160	2B	154633225	0.086940377	0.371134021	99	-0.031562053	0.002390746	0.090877482	-0.828262418
M6493	3A	621586722	0.087026678	0.092783505	99	-0.031562053	0.002371882	0.111601362	-1.247858277
M3756	2B	392096989	0.087030509	0.453608247	99	-0.031562053	0.002371045	0.104777823	-1.100210262
M13176	6B	0	0.087155415	0.154639175	99	-0.031562053	0.002343778	0.105365306	-1.112528542
M889	1B	630581864	0.087298059	0.402061856	99	-0.031562053	0.002312693	0.129107177	1.664553613
M12305	6A	0	0.087360007	0.134020619	99	-0.031562053	0.002299211	0.103764966	-1.079016032
M8815	4A	0	0.087568804	0.072164948	99	-0.031562053	0.002253845	0.115830715	-1.343929303
M11628	5B	596950005	0.087614968	0.391752577	99	-0.031562053	0.002243831	0.086449188	-0.749590041
M6708	3A	710298658	0.087643018	0.288659794	99	-0.031562053	0.002237749	0.115750826	1.337587634
M10610	5B	0	0.08774164	0.154639175	99	-0.031562053	0.002216383	0.112946767	-1.277913603
M10414	5A	469501411	0.087750978	0.175257732	99	-0.031562053	0.002214361	0.103988067	1.07913745
M3377	2A	612169049	0.087791196	0.463917526	99	-0.031562053	0.002205657	0.094623579	0.893156511
M1308	1B	578521082	0.087822037	0.12371134	99	-0.031562053	0.002198985	0.118079347	1.392074241
M4456	2B	615886571	0.087856886	0.319587629	99	-0.031562053	0.002191448	0.089329728	0.795788581
M6208	3A	603025700	0.088010482	0.319587629	99	-0.031562053	0.002158273	0.091766248	-0.844262697
M862	1B	16897282	0.088024596	0.278350515	99	-0.031562053	0.002155227	0.09963524	-0.994873341
M11729	5B	669502971	0.08818194	0.216494845	99	-0.031562053	0.002121314	0.095781341	-0.919527848
M15398	7B	522729143	0.088274906	0.432989691	99	-0.031562053	0.002101308	0.102309302	-1.04882063
M7768	3B	13505175	0.088305361	0.06185567	99	-0.031562053	0.002094759	0.123041277	-1.516010339
M4696	2B	712830783	0.088371993	0.463917526	99	-0.031562053	0.002080439	0.09112652	-0.83248471
M776	1B	608789376	0.088455775	0.164948454	99	-0.031562053	0.002062451	0.108839368	-1.186663253
M14470	7A	48626121	0.088552468	0.030927835	99	-0.031562053	0.002041714	0.146353737	-2.143983348
M4760	2B	0	0.088656827	0.134020619	99	-0.031562053	0.002019361	0.110159459	-1.215529998
M9456	4B	0	0.0886631	0.092783505	99	-0.031562053	0.002018018	0.111143829	-1.237313091
M3053	2A	729165930	0.088695111	0.237113402	99	-0.031562053	0.002011168	0.092901472	-0.86507951
M13175	6B	0	0.088763614	0.391752577	99	-0.031562053	0.001996518	0.104499405	-1.09400908
M14429	7A	0	0.088789983	0.474226804	99	-0.031562053	0.001990882	0.104018292	-1.083971396
M11076	5B	592867962	0.088790318	0.371134021	99	-0.031562053	0.00199081	0.107909816	1.16246203
M14356	7A	23895123	0.088796983	0.474226804	99	-0.031562053	0.001989386	0.109748347	-1.206459348
M12433	6A	61874990	0.088931499	0.082474227	99	-0.031562053	0.001960667	0.125738709	-1.582982953
M9835	5A	5650428	0.089061692	0.340206186	99	-0.031562053	0.001932915	0.09851802	0.968647109
M14412	7A	21667629	0.08908503	0.463917526	99	-0.031562053	0.001927946	0.112286044	-1.262743504
M1713	1B	629664285	0.089248803	0.371134021	99	-0.031562053	0.00189311	0.107993561	-1.168154033
M5230	2B	645000730	0.089378359	0.340206186	99	-0.031562053	0.001865603	0.113768425	-1.29619106
M3481	2B	12913977	0.089451489	0.443298969	99	-0.031562053	0.001850095	0.102512775	1.049036807
M12576	6A	524836376	0.089454121	0.082474227	99	-0.031562053	0.001849537	0.11293957	1.273685116
M11454	5B	651409879	0.089529286	0.134020619	99	-0.031562053	0.001833613	0.102078674	-1.043839185
M7778	3B	711641981	0.089579453	0.474226804	99	-0.031562053	0.001822993	0.106377401	-1.133438138
M7268	3B	102634320	0.089661672	0.381443299	99	-0.031562053	0.001805603	0.088159396	0.775402311
M6662	3A	702539146	0.089692499	0.226804124	99	-0.031562053	0.001799087	0.095104097	-0.906278009
M9194	4A	704622078	0.089741883	0.195876289	99	-0.031562053	0.001788653	0.112155357	1.256093766
M877	1B	22152407	0.089770899	0.319587629	99	-0.031562053	0.001782526	0.092358684	-0.854795184
M3122	2A	746935242	0.089783377	0.288659794	99	-0.031562053	0.001779892	0.090002364	-0.811822453
M2664	2A	120722528	0.089784278	0.278350515	99	-0.031562053	0.001779702	0.099996773	-1.00171517
M3499	2B	24690037	0.089858369	0.278350515	99	-0.031562053	0.001764069	0.10361021	-1.075271638
M10787	5B	208728682	0.089956986	0.402061856	99	-0.031562053	0.001743283	0.100265483	-1.00706
M8126	3B	597096465	0.089978816	0.103092784	99	-0.031562053	0.001738685	0.107454813	1.152915008
M6312	3A	69361313	0.090002438	0.474226804	99	-0.031562053	0.001733711	0.098116693	0.960954836
M6315	3A	60005414	0.090036467	0.463917526	99	-0.031562053	0.001726549	0.099176011	0.981861561
M358	1A	497201654	0.090053946	0.257731959	99	-0.031562053	0.001722871	0.124257629	1.542272975
M1196	1B	111836824	0.090069734	0.030927835	99	-0.031562053	0.00171955	0.137278329	1.88281441
M8456	3D	546706726	0.090112256	0.195876289	99	-0.031562053	0.001710607	0.102349912	1.045839848
M296	1A	14940124	0.090260788	0.082474227	99	-0.031562053	0.001679407	0.11763782	-1.385545083
M3400	2B	0	0.090304377	0.463917526	99	-0.031562053	0.001670262	0.089061983	-0.794873938
M7965	3B	748458996	0.090411085	0.103092784	99	-0.031562053	0.001647894	0.111705513	1.246164275
M3605	2B	163007189	0.090438628	0.422680412	99	-0.031562053	0.001642125	0.085870168	0.735726442
M3637	2B	306113161	0.090460114	0.164948454	99	-0.031562053	0.001637627	0.098457031	0.967741076
M10644	5B	72083499	0.090470931	0.257731959	99	-0.031562053	0.001635362	0.099423747	-0.990143517
M15314	7B	333414790	0.090817776	0.103092784	99	-0.031562053	0.001562911	0.107910079	-1.166021432
M11006	5B	481080959	0.090850189	0.319587629	99	-0.031562053	0.001556156	0.091418151	-0.837283993
M4802	2B	744186437	0.09085336	0.134020619	99	-0.031562053	0.001555496	0.108049528	1.16591456
M1915	1B	676984396	0.090924139	0.371134021	99	-0.031562053	0.001540755	0.152958141	2.33807854
M2527	2A	42150492	0.090929203	0.329896907	99	-0.031562053	0.001539701	0.096529166	0.930248287
M12339	6A	615268982	0.090954314	0.443298969	99	-0.031562053	0.001534474	0.10466219	1.093882923
M12343	6A	469537832	0.090954314	0.443298969	99	-0.031562053	0.001534474	0.10466219	1.093882923
M11791	5B	656472011	0.091112056	0.309278351	99	-0.031562053	0.00150168	0.105607687	1.113796672
M12799	6A	599927110	0.091152764	0.309278351	99	-0.031562053	0.001493227	0.096549138	0.930680377
M14559	7A	75357674	0.091215777	0.412371134	99	-0.031562053	0.00148015	0.115406691	-1.333350585
M13206	6B	83260267	0.09127592	0.309278351	99	-0.031562053	0.001467678	0.12545474	-1.575356862
M1982	1D	305817	0.09134424	0.298969072	99	-0.031562053	0.001453522	0.102669473	-1.055555585
M15322	7B	228919573	0.091374836	0.474226804	99	-0.031562053	0.001447186	0.105442874	-1.113267151
M12842	6A	112239421	0.091452852	0.309278351	99	-0.031562053	0.001431041	0.092933313	-0.865091109
M10448	5A	612915484	0.09145792	0.494845361	99	-0.031562053	0.001429993	0.111003293	1.230743109
M10376	5A	572043684	0.091489855	0.164948454	99	-0.031562053	0.001423389	0.102865333	-1.059551066
M2038	1D	25443095	0.091578404	0.288659794	99	-0.031562053	0.001405091	0.110808374	-1.229254669
M9280	4A	724234050	0.091655174	0.072164948	99	-0.031562053	0.001389242	0.118260429	1.397163662
M3843	2B	136811320	0.091683319	0.175257732	99	-0.031562053	0.001383436	0.110536275	1.22044338
M15353	7B	364043435	0.091849922	0.463917526	99	-0.031562053	0.001349105	0.102397523	1.047176173
M15184	7B	80326304	0.091867685	0.154639175	99	-0.031562053	0.001345448	0.108880342	1.184147442
M15174	7B	10160995	0.091867685	0.154639175	99	-0.031562053	0.001345448	0.108756701	-1.184147442
M13647	6B	699020779	0.091879287	0.381443299	99	-0.031562053	0.00134306	0.096005338	0.920359439
M4971	2B	623392065	0.092022745	0.432989691	99	-0.031562053	0.001313564	0.096420115	-0.930997429
M491	1A	543387659	0.09207192	0.381443299	99	-0.031562053	0.001303465	0.089692651	0.803173693
M212	1A	293607657	0.092091611	0.360824742	99	-0.031562053	0.001299422	0.093788882	0.878336016
M441	1A	531561531	0.092178467	0.391752577	99	-0.031562053	0.001281603	0.111594659	-1.246618391
M4686	2B	704429363	0.092181088	0.494845361	99	-0.031562053	0.001281066	0.099756197	0.993848827
M11042	5B	630923004	0.092248643	0.340206186	99	-0.031562053	0.00126722	0.097929884	0.957758991
M9842	5A	5119051	0.092284634	0.432989691	99	-0.031562053	0.001259847	0.087117019	-0.760197342
M7831	3B	733356572	0.092291391	0.350515464	99	-0.031562053	0.001258464	0.131731558	-1.736578808
M8606	4A	67350278	0.092310315	0.494845361	99	-0.031562053	0.001254589	0.092284722	-0.852901586
M3530	2B	0	0.092311769	0.18556701	99	-0.031562053	0.001254291	0.094542104	-0.895075232
M8363	3D	436621773	0.092393869	0.216494845	99	-0.031562053	0.001237492	0.106480281	-1.135042506
M13688	6B	614446534	0.092516614	0.195876289	99	-0.031562053	0.001212406	0.10034529	-1.008130119
M4116	2B	416058086	0.092686349	0.154639175	99	-0.031562053	0.001177777	0.103863087	-1.079931857
M6774	3A	58591208	0.092746391	0.12371134	99	-0.031562053	0.001165544	0.100848637	1.015879214
M14609	7A	108785756	0.092793065	0.453608247	99	-0.031562053	0.001156041	0.09876904	0.974376279
M11589	5B	584096333	0.092820149	0.082474227	99	-0.031562053	0.001150529	0.117946557	1.389988513
M78	1A	14189304	0.092860521	0.175257732	99	-0.031562053	0.001142316	0.097868031	0.956672828
M11835	5B	0	0.092899788	0.494845361	99	-0.031562053	0.001134332	0.115936842	-1.345269461
M3038	2A	720584287	0.092903678	0.443298969	99	-0.031562053	0.001133541	0.086695736	0.750481531
M1880	1B	670160278	0.092954027	0.113402062	99	-0.031562053	0.001123309	0.111072338	-1.234829744
M5113	2B	622858890	0.093097184	0.278350515	99	-0.031562053	0.001094249	0.096230355	-0.927122364
M3281	2A	773395688	0.093134054	0.474226804	99	-0.031562053	0.001086773	0.127963585	1.636381136
M8860	4A	49224781	0.093246048	0.494845361	99	-0.031562053	0.001064084	0.092889188	0.86177604
M6277	3A	41376359	0.093493546	0.381443299	99	-0.031562053	0.001014049	0.093252473	-0.870616412
M1435	1B	30873517	0.093574463	0.216494845	99	-0.031562053	0.000997723	0.096622892	0.932600605
M3709	2B	79312880	0.0935905	0.494845361	99	-0.031562053	0.000994489	0.087733425	0.768720892
M8843	4A	180859936	0.093591751	0.360824742	99	-0.031562053	0.000994236	0.089408733	0.798397911
M13173	6B	102070380	0.093702652	0.340206186	99	-0.031562053	0.00097189	0.093988853	0.88241856
M12025	5D	629968953	0.093862039	0.391752577	99	-0.031562053	0.000939825	0.129053484	-1.666419988
M5979	2D	646461966	0.09390512	0.268041237	99	-0.031562053	0.000931168	0.094638603	-0.896577688
M10381	5A	568324443	0.093911925	0.443298969	99	-0.031562053	0.000929801	0.09605243	-0.923536739
M12608	6A	546961492	0.093922705	0.175257732	99	-0.031562053	0.000927636	0.104410296	1.089223358
M96	1A	16408364	0.094110311	0.154639175	99	-0.031562053	0.000889997	0.101297987	1.025238211
M3903	2B	64912411	0.094178664	0.340206186	99	-0.031562053	0.000876304	0.094341015	-0.890899015
M4188	2B	374802883	0.094397039	0.422680412	99	-0.031562053	0.000832632	0.104560073	1.092448244
M12466	6A	113174438	0.094461963	0.082474227	99	-0.031562053	0.00081967	0.116375182	1.353498621
M5748	2D	593851647	0.094870924	0.484536082	99	-0.031562053	0.000738244	0.107931203	-1.165652705
M10777	5B	398715853	0.094916135	0.402061856	99	-0.031562053	0.000729267	0.099699681	-0.994731898
M9782	4D	446124259	0.094965386	0.12371134	99	-0.031562053	0.000719492	0.1026748	1.053491972
M11783	5B	682399214	0.095027388	0.453608247	99	-0.031562053	0.000707195	0.12150136	-1.476965248
M794	1B	0	0.095060064	0.474226804	99	-0.031562053	0.000700717	0.095664063	-0.915862013
M1752	1B	634501736	0.095107627	0.072164948	99	-0.031562053	0.000691293	0.113521334	-1.289400616
M15290	7B	123765018	0.095200848	0.278350515	99	-0.031562053	0.000672838	0.09491964	0.900300973
M15479	7B	600833201	0.095201607	0.319587629	99	-0.031562053	0.000672688	0.089235259	0.795620455
M12246	6A	17925787	0.095246425	0.24742268	99	-0.031562053	0.000663822	0.101032121	1.02008512
M809	1B	0	0.095276832	0.494845361	99	-0.031562053	0.00065781	0.095138737	0.904480121
M15468	7B	600008050	0.095281129	0.391752577	99	-0.031562053	0.000656961	0.094696462	0.89608503
M4526	2B	547273650	0.095323121	0.402061856	99	-0.031562053	0.000648662	0.094746097	0.897033631
M821	1B	35453808	0.095338965	0.350515464	99	-0.031562053	0.000645531	0.149948397	2.247806641
M399	1A	511486231	0.095658138	0.412371134	99	-0.031562053	0.000582595	0.093348419	-0.871975331
M9383	4A	739304166	0.095761399	0.288659794	99	-0.031562053	0.000562284	0.093292381	0.869784554
M1412	1B	0	0.095881486	0.340206186	99	-0.031562053	0.000538693	0.097110849	-0.94359039
M8223	3B	829535069	0.095917773	0.340206186	99	-0.031562053	0.000531571	0.097276336	0.945736988
M5933	2D	747238713	0.09597212	0.268041237	99	-0.031562053	0.00052091	0.09992232	0.997926099
M6047	3A	8645157	0.096009553	0.412371134	99	-0.031562053	0.00051357	0.125785387	-1.582709917
M7861	3B	24460849	0.096096561	0.443298969	99	-0.031562053	0.000496523	0.09239083	0.853110027
M5213	2B	22624787	0.09611139	0.360824742	99	-0.031562053	0.00049362	0.087783467	-0.771087329
M7130	3B	25803087	0.096126922	0.257731959	99	-0.031562053	0.000490579	0.096848827	0.937478946
M13834	6B	471568711	0.096221757	0.494845361	99	-0.031562053	0.000472024	0.111282	-1.238840377
M786	1B	0	0.096280073	0.371134021	99	-0.031562053	0.000460625	0.089292878	-0.797782426
M131	1A	16933203	0.096282718	0.484536082	99	-0.031562053	0.000460108	0.098548044	0.970711598
M48	1A	0	0.096369727	0.432989691	99	-0.031562053	0.000443114	0.09563185	0.914101967
M4251	2B	50457916	0.096404656	0.237113402	99	-0.031562053	0.000436297	0.104990792	1.101870352
M14091	6D	462479338	0.09643034	0.082474227	99	-0.031562053	0.000431286	0.12057915	-1.454364418
M10264	5A	540039194	0.096556929	0.216494845	99	-0.031562053	0.000406609	0.092693791	0.858807274
M4922	2B	620326915	0.096644428	0.237113402	99	-0.031562053	0.000389574	0.099342956	-0.987291868
M13119	6B	26195828	0.096755105	0.216494845	99	-0.031562053	0.00036805	0.099153051	0.982764711
M5028	2B	758922449	0.096816764	0.422680412	99	-0.031562053	0.000356071	0.109595533	1.200762015
M3240	2A	779846658	0.096832956	0.432989691	99	-0.031562053	0.000352927	0.110288134	-1.216700174
M12668	6A	337842296	0.096837928	0.175257732	99	-0.031562053	0.000351961	0.102045964	-1.041689839
M14862	7A	679816918	0.096854456	0.134020619	99	-0.031562053	0.000348752	0.105804207	1.119104269
M8458	3D	666983570	0.0968714	0.329896907	99	-0.031562053	0.000345463	0.095129416	-0.905306044
M1942	1B	683150051	0.096879996	0.360824742	99	-0.031562053	0.000343795	0.096978224	-0.940821379
M2706	2A	417084357	0.096897097	0.463917526	99	-0.031562053	0.000340476	0.124717642	1.555108544
M9391	4A	732814470	0.096901843	0.24742268	99	-0.031562053	0.000339555	0.0912608	-0.833192911
M2391	2A	24002743	0.096910864	0.298969072	99	-0.031562053	0.000337805	0.100506536	-1.010494174
M8055	3B	11511729	0.097003441	0.371134021	99	-0.031562053	0.000319854	0.13320218	1.773962217
M8025	3B	300286021	0.097003441	0.371134021	99	-0.031562053	0.000319854	0.133178165	-1.773962217
M7895	3B	211212780	0.09701555	0.298969072	99	-0.031562053	0.000317508	0.089145044	0.794366378
M487	1A	339729738	0.097068709	0.340206186	99	-0.031562053	0.00030721	0.136263054	1.856454782
M8082	3B	793011311	0.097087802	0.340206186	99	-0.031562053	0.000303513	0.12346353	-1.524627836
M4679	2B	0	0.097149577	0.402061856	99	-0.031562053	0.000291557	0.09984683	0.99664738
M14359	7A	75955695	0.097262469	0.391752577	99	-0.031562053	0.000269729	0.119806688	1.435094512
M8809	4A	601841436	0.097394682	0.422680412	99	-0.031562053	0.000244201	0.112397997	1.263086781
M4487	2B	577540966	0.09740642	0.443298969	99	-0.031562053	0.000241936	0.111357724	1.239812335
M8672	4A	195228281	0.097559711	0.371134021	99	-0.031562053	0.000212391	0.099577548	0.991356425
M3862	2B	0	0.097564619	0.113402062	99	-0.031562053	0.000211446	0.112010149	1.254415902
M8814	4A	605005072	0.097573969	0.494845361	99	-0.031562053	0.000209645	0.100073041	-1.001671004
M13516	6B	643863927	0.097587998	0.041237113	99	-0.031562053	0.000206944	0.138458006	1.916854988
M4598	2B	0	0.097595695	0.216494845	99	-0.031562053	0.000205462	0.100083035	-1.001866858
M11173	5B	46577932	0.097698597	0.329896907	99	-0.031562053	0.000185666	0.100473482	-1.009677721
M15325	7B	200352412	0.097712516	0.18556701	99	-0.031562053	0.00018299	0.100620831	1.012272169
M14171	7A	501554142	0.097821388	0.18556701	99	-0.031562053	0.000162073	0.104602393	1.094003998
M525	1A	549851141	0.097828229	0.453608247	99	-0.031562053	0.000160759	0.098082487	-0.96217819
M133	1A	46292062	0.097998036	0.381443299	99	-0.031562053	0.000128189	0.098997554	-0.980179762
M3897	2B	137802366	0.098012093	0.350515464	99	-0.031562053	0.000125496	0.118937785	-1.414745157
M10526	5A	698225850	0.098074024	0.360824742	99	-0.031562053	0.000113635	0.144088527	-2.076263992
M14675	7A	191173951	0.098178723	0.237113402	99	-0.031562053	9.36E-05	0.098399079	0.968144272
M3209	2A	778811091	0.098223857	0.494845361	99	-0.031562053	8.50E-05	0.104696312	-1.09621674
M12790	6A	599169953	0.098264259	0.257731959	99	-0.031562053	7.73E-05	0.090431676	0.81771155
M6176	3A	20238715	0.098299519	0.453608247	99	-0.031562053	7.05E-05	0.091844221	0.843465585
M4369	2B	0	0.098446058	0.268041237	99	-0.031562053	4.26E-05	0.09277504	0.860678255
M8820	4A	144566764	0.098467115	0.113402062	99	-0.031562053	3.85E-05	0.107723865	-1.160481649
M4087	2B	94344351	0.098511961	0.226804124	99	-0.031562053	3.00E-05	0.10004137	1.000797584
M8101	3B	805556027	0.098569791	0.268041237	99	-0.031562053	1.90E-05	0.107248767	-1.150248783
M769	1B	675284827	0.098603816	0.329896907	99	-0.031562053	1.25E-05	0.101267976	-1.025532806
M10554	5B	9044910	0.09873277	0.340206186	99	-0.031562053	-1.20E-05	0.089657048	0.803850642
M1632	1B	587501291	0.098748658	0.206185567	99	-0.031562053	-1.50E-05	0.094653062	0.895935251
M11861	5B	700001961	0.098829034	0.371134021	99	-0.031562053	-3.03E-05	0.108381955	1.174695115
M6146	3A	20989569	0.098908135	0.494845361	99	-0.031562053	-4.53E-05	0.097311063	-0.946898989
M4473	2B	638230965	0.098944597	0.453608247	99	-0.031562053	-5.22E-05	0.09362439	-0.876500419
M4534	2B	669343803	0.099085376	0.06185567	99	-0.031562053	-7.89E-05	0.118162567	-1.396160327
M10401	5A	582094327	0.099121107	0.474226804	99	-0.031562053	-8.57E-05	0.095027823	-0.902943055
M5744	2D	596910467	0.099142237	0.474226804	99	-0.031562053	-8.97E-05	0.107135445	-1.147710707
M9286	4A	725941577	0.099236766	0.422680412	99	-0.031562053	-0.000107528	0.10009895	1.002087501
M5694	2D	0	0.099284598	0.443298969	99	-0.031562053	-0.000116565	0.094494259	0.893033055
M4836	2B	746680541	0.099379489	0.381443299	99	-0.031562053	-0.000134477	0.091797035	-0.842535084
M295	1A	14940124	0.099392325	0.319587629	99	-0.031562053	-0.000136899	0.105851853	1.120598381
M8534	4A	17017869	0.099475307	0.381443299	99	-0.031562053	-0.000152545	0.105835948	1.120277345
M8361	3D	58370125	0.099535372	0.474226804	99	-0.031562053	-0.000163862	0.102477977	-1.050009723
M6626	3A	547633302	0.099571646	0.340206186	99	-0.031562053	-0.000170692	0.106802603	-1.140508911
M14634	7A	156267353	0.099668212	0.206185567	99	-0.031562053	-0.000188863	0.100556012	-1.01096229
M9366	4A	732819559	0.099669689	0.216494845	99	-0.031562053	-0.00018914	0.099214076	0.984532434
M15544	7B	92684193	0.099703001	0.474226804	99	-0.031562053	-0.000195404	0.091363645	-0.834536154
M1688	1B	453210400	0.099873958	0.474226804	99	-0.031562053	-0.000227512	0.091314889	0.834068415
M1104	1B	262341897	0.099942323	0.103092784	99	-0.031562053	-0.000240334	0.109277193	1.19439082
M8898	4A	0	0.099980907	0.484536082	99	-0.031562053	-0.000247567	0.106283636	-1.129373557
M5150	2B	0	0.100047161	0.12371134	99	-0.031562053	-0.000259979	0.102495448	1.050791672
M13174	6B	102070380	0.100053024	0.463917526	99	-0.031562053	-0.000261077	0.098494041	0.970368696
M10440	5A	362054918	0.100071726	0.494845361	99	-0.031562053	-0.000264579	0.106975298	1.144636014
M6713	3A	669396058	0.100103931	0.319587629	99	-0.031562053	-0.000270607	0.100278039	-1.005297899
M5779	2D	586846415	0.100194061	0.494845361	99	-0.031562053	-0.000287467	0.087095389	0.758848139
M13984	6D	86013961	0.10026385	0.216494845	99	-0.031562053	-0.00030051	0.104565405	-1.09309188
M10343	5A	568799936	0.100276211	0.463917526	99	-0.031562053	-0.000302819	0.104095475	1.083889621
M10399	5A	581488583	0.100276211	0.463917526	99	-0.031562053	-0.000302819	0.104095475	1.083889621
M9939	5A	2861753	0.100435316	0.206185567	99	-0.031562053	-0.000332514	0.097917589	-0.958452907
M8380	3D	75963605	0.100505148	0.257731959	99	-0.031562053	-0.00034553	0.088952842	0.791606341
M13129	6B	55579051	0.100525178	0.268041237	99	-0.031562053	-0.000349262	0.100774622	-1.015203184
M9624	4B	0	0.100561226	0.319587629	99	-0.031562053	-0.000355976	0.099824626	0.996851575
M3167	2A	512149585	0.100599375	0.360824742	99	-0.031562053	-0.000363078	0.094547966	0.89429486
M83	1A	14718514	0.100641571	0.391752577	99	-0.031562053	-0.00037093	0.09502379	0.903323001
M11953	5D	543270056	0.100769102	0.350515464	99	-0.031562053	-0.00039464	0.131887072	1.739814624
M610	1A	573393055	0.100835018	0.041237113	99	-0.031562053	-0.000406881	0.135294991	1.830880345
M11665	5B	609899764	0.100908989	0.350515464	99	-0.031562053	-0.000420609	0.086956646	-0.755725226
M848	1B	17621853	0.1009144	0.298969072	99	-0.031562053	-0.000421612	0.098940513	-0.978500903
M8314	3D	376879674	0.101126454	0.298969072	99	-0.031562053	-0.0004609	0.096470239	-0.9301898
M14013	6D	339389407	0.101288092	0.113402062	99	-0.031562053	-0.000490785	0.112996562	-1.276331511
M2265	1D	482503736	0.101335788	0.463917526	99	-0.031562053	-0.000499593	0.094474951	0.893051226
M5393	2D	15857433	0.101406951	0.371134021	99	-0.031562053	-0.000512727	0.112080682	-1.255695193
M8544	4A	286309978	0.10143707	0.443298969	99	-0.031562053	-0.000518283	0.102335646	1.047776735
M9352	4A	0	0.101545842	0.195876289	99	-0.031562053	-0.000538331	0.106475741	1.134246677
M5866	2D	601604653	0.101709123	0.144329897	99	-0.031562053	-0.000568381	0.097586589	-0.951745856
M10652	5B	48311248	0.101714335	0.402061856	99	-0.031562053	-0.00056934	0.117297447	1.376438437
M3798	2B	262262279	0.101757823	0.391752577	99	-0.031562053	-0.000577334	0.091555056	0.838810156
M12176	6A	12313676	0.10186961	0.092783505	99	-0.031562053	-0.000597865	0.122137785	-1.491165991
M9021	4A	656904182	0.101880923	0.402061856	99	-0.031562053	-0.000599942	0.095449686	0.911664197
M5151	2B	0	0.102016586	0.422680412	99	-0.031562053	-0.000624822	0.08871274	0.787619848
M6352	3A	432591149	0.102028969	0.298969072	99	-0.031562053	-0.000627091	0.105372709	-1.109713682
M15369	7B	451485910	0.102055886	0.288659794	99	-0.031562053	-0.000632023	0.086368789	-0.745324749
M11928	5D	494878765	0.102072657	0.381443299	99	-0.031562053	-0.000635094	0.088138949	0.77748252
M9936	5A	79280510	0.102094128	0.402061856	99	-0.031562053	-0.000639026	0.118668582	1.408862253
M3478	2B	9882881	0.102124578	0.474226804	99	-0.031562053	-0.000644601	0.108377474	-1.173923081
M493	1A	614826908	0.102235259	0.453608247	99	-0.031562053	-0.000664848	0.093768742	-0.878592842
M10716	5B	75319717	0.102377048	0.226804124	99	-0.031562053	-0.000690751	0.09244719	0.85533904
M10038	5A	445275979	0.102466628	0.113402062	99	-0.031562053	-0.000707096	0.130263124	1.697555234
M10118	5A	742010724	0.102466628	0.113402062	99	-0.031562053	-0.000707096	0.130317394	-1.697555234
M3520	2B	0	0.102483163	0.216494845	99	-0.031562053	-0.000710111	0.089945256	0.809725017
M1402	1B	657569825	0.102484204	0.237113402	99	-0.031562053	-0.0007103	0.099698522	0.994689836
M4667	2B	715249876	0.102501917	0.402061856	99	-0.031562053	-0.00071353	0.105211976	1.107669528
M6412	3A	516789415	0.10262329	0.288659794	99	-0.031562053	-0.000735641	0.093123409	-0.866461291
M6085	3A	7794910	0.102635195	0.484536082	99	-0.031562053	-0.000737809	0.096778941	0.937354148
M13103	6B	39302769	0.102642458	0.443298969	99	-0.031562053	-0.000739131	0.113010231	-1.27639209
M10216	5A	531244279	0.102649513	0.18556701	99	-0.031562053	-0.000740415	0.098086368	-0.961353138
M3132	2A	192381627	0.102654535	0.030927835	99	-0.031562053	-0.000741329	0.137837749	1.900665828
M8156	3B	75766790	0.102673637	0.432989691	99	-0.031562053	-0.000744805	0.09659004	0.933708397
M6618	3A	688594260	0.10275072	0.24742268	99	-0.031562053	-0.000758825	0.10219301	1.045099958
M11822	5B	34137545	0.102810117	0.484536082	99	-0.031562053	-0.00076962	0.099911368	0.998997764
M6573	3A	417553440	0.102811964	0.474226804	99	-0.031562053	-0.000769956	0.087250562	-0.760496108
M6880	3A	757610977	0.102824725	0.278350515	99	-0.031562053	-0.000772274	0.106035581	1.125126717
M8557	4A	63814925	0.102960042	0.340206186	99	-0.031562053	-0.000796838	0.112468574	-1.264121168
M7868	3B	423975549	0.102964706	0.391752577	99	-0.031562053	-0.000797684	0.125318759	-1.569681449
M8706	4A	25985745	0.102990108	0.051546392	99	-0.031562053	-0.000802291	0.121960497	-1.486633993
M4871	2B	743417549	0.103021415	0.360824742	99	-0.031562053	-0.000807967	0.099394743	-0.987123529
M12584	6A	553941354	0.10314413	0.298969072	99	-0.031562053	-0.000830197	0.101587157	-1.031164846
M868	1B	5156091	0.103269241	0.432989691	99	-0.031562053	-0.000852832	0.089317561	0.798615495
M8678	4A	374355718	0.103614871	0.484536082	99	-0.031562053	-0.000915202	0.099783375	-0.994757
M5265	2B	31477695	0.103692993	0.175257732	99	-0.031562053	-0.000929268	0.098907513	0.979198872
M584	1A	0	0.103746193	0.340206186	99	-0.031562053	-0.000938839	0.171718058	2.949647976
M7784	3B	527558091	0.103759317	0.371134021	99	-0.031562053	-0.0009412	0.129387944	1.675065208
M15198	7B	23321643	0.103766307	0.360824742	99	-0.031562053	-0.000942457	0.093688476	-0.87681059
M8642	4A	232157833	0.103782417	0.257731959	99	-0.031562053	-0.000945354	0.097502879	-0.949735781
M13690	6B	708010088	0.103788113	0.175257732	99	-0.031562053	-0.000946378	0.101660184	1.034425669
M10552	5B	713387538	0.103809348	0.195876289	99	-0.031562053	-0.000950195	0.104455332	-1.090141433
M12146	6A	8803926	0.103948399	0.020618557	99	-0.031562053	-0.00097517	0.15297897	-2.339281371
M7471	3B	127778429	0.10394921	0.24742268	99	-0.031562053	-0.000975316	0.103238106	1.066785974
M2584	2A	70871621	0.103982469	0.154639175	99	-0.031562053	-0.000981284	0.102869958	1.059204108
M11969	5D	703088649	0.104049746	0.340206186	99	-0.031562053	-0.00099335	0.097964973	-0.95872025
M2820	2A	559553702	0.10408566	0.113402062	99	-0.031562053	-0.000999787	0.101292151	1.027009779
M6117	3A	15478548	0.104092143	0.474226804	99	-0.031562053	-0.001000949	0.086412506	-0.74571117
M1232	1B	86102631	0.104192632	0.257731959	99	-0.031562053	-0.001018948	0.103464214	1.071503309
M11503	5B	142781109	0.10428951	0.237113402	99	-0.031562053	-0.001036281	0.099194245	-0.982913534
M500	1A	540414573	0.104321565	0.381443299	99	-0.031562053	-0.001042012	0.105790142	1.120197436
M8139	3B	811421481	0.104361557	0.484536082	99	-0.031562053	-0.001049159	0.100095826	1.00296659
M11934	5D	437761268	0.104425794	0.381443299	99	-0.031562053	-0.001060634	0.130383285	1.701040746
M12098	6A	0	0.104425794	0.381443299	99	-0.031562053	-0.001060634	0.130383285	1.701040746
M11596	5B	680227055	0.104576668	0.216494845	99	-0.031562053	-0.001087553	0.093338368	-0.870117533
M1611	1B	588284390	0.104689211	0.360824742	99	-0.031562053	-0.001107605	0.089577802	0.803525857
M6244	3A	11980146	0.104780551	0.103092784	99	-0.031562053	-0.001123861	0.112018292	1.255933629
M572	1A	559780847	0.104801199	0.24742268	99	-0.031562053	-0.001127534	0.097556284	0.952850383
M3636	2B	504867107	0.104803117	0.412371134	99	-0.031562053	-0.001127875	0.096629495	0.934853804
M1804	1B	655311824	0.104823559	0.319587629	99	-0.031562053	-0.00113151	0.083667322	-0.698890566
M5659	2D	620224144	0.104847121	0.257731959	99	-0.031562053	-0.001135699	0.107206381	1.150456514
M1425	1B	531206119	0.105029716	0.381443299	99	-0.031562053	-0.001168127	0.093908028	0.883039898
M14505	7A	55923161	0.10507216	0.360824742	99	-0.031562053	-0.001175656	0.135002197	-1.821383663
M716	1B	0	0.105143918	0.309278351	99	-0.031562053	-0.001188377	0.092567579	0.858064041
M13250	6B	128193460	0.105275545	0.082474227	99	-0.031562053	-0.001211686	0.110056484	-1.210031273
M3659	2B	33241377	0.10531408	0.412371134	99	-0.031562053	-0.001218504	0.120545073	1.454329961
M6151	3A	22262008	0.105400252	0.402061856	99	-0.031562053	-0.00123374	0.09518173	-0.904722424
M7878	3B	586524432	0.105403397	0.041237113	99	-0.031562053	-0.001234295	0.134697275	-1.813101281
M5762	2D	599692843	0.105434572	0.443298969	99	-0.031562053	-0.001239804	0.096678188	-0.933427393
M2019	1D	16297590	0.105488691	0.402061856	99	-0.031562053	-0.001249362	0.098895932	0.97928989
M9030	4A	48707567	0.105525848	0.432989691	99	-0.031562053	-0.001255921	0.091715221	0.842424094
M6685	3A	711115907	0.105704632	0.463917526	99	-0.031562053	-0.001287445	0.10071521	1.015642797
M7966	3B	748458996	0.105784006	0.422680412	99	-0.031562053	-0.001301422	0.112897462	1.275885112
M6712	3A	715352220	0.105796513	0.484536082	99	-0.031562053	-0.001303624	0.085292258	0.72878055
M14921	7A	699917597	0.105814618	0.443298969	99	-0.031562053	-0.00130681	0.11346974	1.288845001
M14277	7A	6849511	0.105851254	0.113402062	99	-0.031562053	-0.001313255	0.104844723	1.100554848
M2993	2A	710105092	0.105855446	0.391752577	99	-0.031562053	-0.001313992	0.086122451	-0.74039366
M7992	3B	816555648	0.106095336	0.329896907	99	-0.031562053	-0.001356131	0.093065106	-0.864755268
M14976	7A	711824297	0.106110184	0.12371134	99	-0.031562053	-0.001358736	0.114485967	1.312062403
M8643	4A	413875836	0.106251599	0.371134021	99	-0.031562053	-0.001383523	0.096514402	0.93288651
M8408	3D	349870568	0.106311586	0.463917526	99	-0.031562053	-0.001394026	0.098662466	-0.972034184
M5740	2D	607144225	0.106312878	0.257731959	99	-0.031562053	-0.001394252	0.096671182	-0.933137492
M1628	1B	144111278	0.106327521	0.494845361	99	-0.031562053	-0.001396815	0.099812779	-0.994862263
M11178	5B	0	0.106327583	0.113402062	99	-0.031562053	-0.001396826	0.105909113	-1.120277186
M5291	2B	795769119	0.106371307	0.154639175	99	-0.031562053	-0.001404477	0.100934934	1.020190572
M12461	6A	106663978	0.106443082	0.092783505	99	-0.031562053	-0.001417027	0.116128059	-1.347155572
M1766	1B	638015288	0.106533765	0.020618557	99	-0.031562053	-0.001432871	0.151226695	-2.285518472
M336	1A	426440396	0.106533765	0.020618557	99	-0.031562053	-0.001432871	0.151226695	-2.285518472
M4936	2B	752843256	0.106542503	0.463917526	99	-0.031562053	-0.001434397	0.089463638	0.801808644
M1399	1B	520682469	0.106569629	0.412371134	99	-0.031562053	-0.001439133	0.087299152	-0.760675068
M1619	1B	603262258	0.106583868	0.494845361	99	-0.031562053	-0.001441619	0.100507185	1.011611033
M6470	3A	61285842	0.106624993	0.360824742	99	-0.031562053	-0.001448795	0.134134324	-1.797752894
M478	1A	540665432	0.106628254	0.319587629	99	-0.031562053	-0.001449364	0.090569402	-0.818832287
M3866	2B	132352331	0.106629448	0.113402062	99	-0.031562053	-0.001449572	0.103751877	1.07789477
M9410	4A	1273632	0.106657202	0.453608247	99	-0.031562053	-0.001454414	0.094023988	0.885505451
M8914	4A	330012453	0.106663915	0.144329897	99	-0.031562053	-0.001455584	0.099722683	-0.993005758
M13455	6B	692920469	0.106736398	0.278350515	99	-0.031562053	-0.00146822	0.093237299	-0.86785118
M8227	3B	28789197	0.106744803	0.134020619	99	-0.031562053	-0.001469685	0.106677402	1.139476487
M14073	6D	599261582	0.107011143	0.340206186	99	-0.031562053	-0.00151603	0.098916674	0.97996686
M5211	2B	116192482	0.107019138	0.391752577	99	-0.031562053	-0.001517419	0.116049563	-1.345232682
M3101	2A	744245837	0.107045018	0.402061856	99	-0.031562053	-0.001521915	0.097580725	0.95372171
M10480	5A	612723577	0.107212741	0.164948454	99	-0.031562053	-0.001551024	0.102248025	-1.043914835
M14564	7A	81928089	0.107225586	0.051546392	99	-0.031562053	-0.001553251	0.120166006	1.445540142
M4906	2B	757243772	0.107232228	0.164948454	99	-0.031562053	-0.001554403	0.096592542	-0.931457524
M15483	7B	0	0.107315319	0.041237113	99	-0.031562053	-0.001568802	0.132498015	1.75714119
M4854	2B	748703470	0.107315961	0.474226804	99	-0.031562053	-0.001568913	0.09328466	0.8717717
M10459	5A	608962342	0.107332258	0.412371134	99	-0.031562053	-0.001571735	0.093140228	0.869081947
M8052	3B	589410123	0.107458779	0.041237113	99	-0.031562053	-0.001593633	0.131109702	1.72056903
M15484	7B	0	0.10749347	0.381443299	99	-0.031562053	-0.001599632	0.126297351	1.596701712
M7711	3B	674665653	0.107582566	0.309278351	99	-0.031562053	-0.001615029	0.115353168	1.33225036
M9193	4A	704622078	0.107589343	0.154639175	99	-0.031562053	-0.001616199	0.11292152	-1.27351076
M13862	6D	1585297	0.10767708	0.391752577	99	-0.031562053	-0.001631347	0.090590233	0.822290369
M3013	2A	706928677	0.107870674	0.24742268	99	-0.031562053	-0.001664721	0.090510757	0.820884436
M6709	3A	614087671	0.108022918	0.360824742	99	-0.031562053	-0.00169092	0.098899288	-0.976415998
M7753	3B	420365956	0.108069526	0.154639175	99	-0.031562053	-0.001698933	0.094626213	0.897110956
M13232	6B	153547588	0.108096595	0.18556701	99	-0.031562053	-0.001703584	0.095375906	-0.907952752
M15193	7B	40276086	0.108145575	0.412371134	99	-0.031562053	-0.001711998	0.084500837	0.71575114
M224	1A	379860792	0.108198281	0.134020619	99	-0.031562053	-0.001721047	0.106989273	-1.142949411
M11194	5B	423502194	0.108223574	0.268041237	99	-0.031562053	-0.001725388	0.094356098	0.892032707
M884	1B	8281654	0.108224366	0.350515464	99	-0.031562053	-0.001725524	0.092296016	0.853580976
M9754	4D	80836783	0.108302325	0.402061856	99	-0.031562053	-0.001738895	0.133709542	-1.786085261
M5351	2B	797277976	0.108316369	0.164948454	99	-0.031562053	-0.001741303	0.10147268	-1.027929177
M4880	2B	751248841	0.108350671	0.474226804	99	-0.031562053	-0.001747183	0.10604514	1.126304353
M8638	4A	0	0.108374854	0.474226804	99	-0.031562053	-0.001751326	0.086967123	0.75807937
M11259	5B	635769576	0.1084014	0.051546392	99	-0.031562053	-0.001755874	0.120225726	-1.443666644
M10437	5A	591433518	0.108410208	0.484536082	99	-0.031562053	-0.001757382	0.103882775	-1.077405713
M6542	3A	501061731	0.108422459	0.175257732	99	-0.031562053	-0.00175948	0.093476384	0.875542914
M12644	6A	22624721	0.10859857	0.134020619	99	-0.031562053	-0.001789611	0.103768956	-1.075010011
M8937	4A	684963131	0.108619891	0.257731959	99	-0.031562053	-0.001793255	0.091295625	0.835282362
M2768	2A	125458503	0.108732639	0.237113402	99	-0.031562053	-0.001812512	0.100920241	1.02030202
M15388	7B	446996734	0.108848928	0.103092784	99	-0.031562053	-0.001832351	0.108394388	1.176766695
M13488	6B	631137282	0.108889424	0.113402062	99	-0.031562053	-0.001839254	0.11252294	-1.264301945
M4811	2B	742460377	0.109106824	0.257731959	99	-0.031562053	-0.001876263	0.093421932	-0.870889483
M12108	6A	586829111	0.109245678	0.06185567	99	-0.031562053	-0.001899857	0.121157846	-1.466022506
M1847	1B	664017254	0.109273898	0.463917526	99	-0.031562053	-0.001904649	0.101232751	1.026711637
M6097	3A	140700735	0.109276132	0.422680412	99	-0.031562053	-0.001905028	0.107530803	1.15819238
M14945	7A	235367940	0.109285501	0.422680412	99	-0.031562053	-0.001906618	0.119975486	1.441318352
M332	1A	474702375	0.109365967	0.010309278	99	-0.031562053	-0.001920271	0.171940655	-2.954438609
M8218	3B	826654769	0.109365967	0.010309278	99	-0.031562053	-0.001920271	0.171940655	-2.954438609
M3987	2B	159210768	0.10947151	0.329896907	99	-0.031562053	-0.00193816	0.118099691	-1.392815549
M2991	2A	710105092	0.109556317	0.268041237	99	-0.031562053	-0.001952522	0.098407641	-0.966453866
M10627	5B	29125387	0.109566364	0.474226804	99	-0.031562053	-0.001954222	0.097343344	-0.945618441
M2162	1D	423930220	0.109597762	0.226804124	99	-0.031562053	-0.001959535	0.107060704	1.148158978
M6631	3A	691041856	0.109637416	0.237113402	99	-0.031562053	-0.001966243	0.101085662	1.023797358
M4648	2B	697714139	0.109676767	0.12371134	99	-0.031562053	-0.001972897	0.101997009	1.042311888
M2808	2A	377043313	0.109696199	0.103092784	99	-0.031562053	-0.001976182	0.104579787	-1.091717012
M7795	3B	508925402	0.109737753	0.381443299	99	-0.031562053	-0.001983204	0.112823456	-1.270930027
M13344	6B	355137498	0.109780055	0.443298969	99	-0.031562053	-0.00199035	0.096490177	0.933025785
M3905	2B	77115800	0.109833869	0.494845361	99	-0.031562053	-0.001999436	0.095106186	-0.90251923
M15372	7B	426526640	0.109845804	0.298969072	99	-0.031562053	-0.00200145	0.091963631	-0.843729497
M10426	5A	585454698	0.109929666	0.319587629	99	-0.031562053	-0.002015597	0.09747342	-0.948091169
M8688	4A	478992616	0.109935499	0.082474227	99	-0.031562053	-0.002016581	0.108569893	1.18075874
M13426	6B	581550867	0.110051186	0.216494845	99	-0.031562053	-0.002036076	0.09129752	-0.831487642
M12498	6A	421534410	0.110069744	0.381443299	99	-0.031562053	-0.002039201	0.113091568	-1.276931071
M10968	5B	393940604	0.110138149	0.340206186	99	-0.031562053	-0.002050715	0.087349721	0.765048083
M142	1A	159684705	0.110228901	0.18556701	99	-0.031562053	-0.002065979	0.09362976	0.878719184
M3440	2B	654942976	0.110242937	0.463917526	99	-0.031562053	-0.002068338	0.102351286	-1.04551023
M15030	7A	0	0.110353202	0.474226804	99	-0.031562053	-0.002086862	0.096405925	0.931497095
M7962	3B	760779117	0.110453564	0.082474227	99	-0.031562053	-0.002103705	0.111540859	-1.242032628
M9632	4B	654440058	0.110560025	0.144329897	99	-0.031562053	-0.002121552	0.100552258	1.013197213
M3722	2B	49874133	0.110577881	0.072164948	99	-0.031562053	-0.002124544	0.115873084	-1.340532608
M10855	5B	536909476	0.110605251	0.412371134	99	-0.031562053	-0.002129128	0.110595991	-1.221018192
M14362	7A	669206467	0.110618537	0.443298969	99	-0.031562053	-0.002131353	0.104982326	1.104260228
M5140	2B	785074409	0.11064407	0.402061856	99	-0.031562053	-0.002135628	0.101090078	1.024056024
M1621	1B	589768769	0.110788309	0.463917526	99	-0.031562053	-0.002159757	0.10489931	1.102546277
M8750	4A	571212163	0.110845752	0.24742268	99	-0.031562053	-0.002169357	0.090005827	-0.807935541
M6149	3A	22262008	0.110858398	0.484536082	99	-0.031562053	-0.002171469	0.10415879	-1.082733879
M3511	2B	15410111	0.110858503	0.381443299	99	-0.031562053	-0.002171487	0.127899706	1.638004973
M6724	3A	715199344	0.11086272	0.443298969	99	-0.031562053	-0.002172191	0.086708034	-0.749656131
M13741	6B	0	0.110898707	0.484536082	99	-0.031562053	-0.002178201	0.09224739	-0.848779896
M6529	3A	639700048	0.111003258	0.092783505	99	-0.031562053	-0.00219565	0.108463782	1.178634843
M779	1B	231095837	0.111021609	0.432989691	99	-0.031562053	-0.002198711	0.110381757	-1.216214524
M6845	3A	329077007	0.111055049	0.463917526	99	-0.031562053	-0.002204287	0.089365266	-0.796410784
M8209	3B	317056611	0.111085522	0.350515464	99	-0.031562053	-0.002209366	0.094982043	0.90436822
M10464	5A	491796631	0.111090884	0.195876289	99	-0.031562053	-0.00221026	0.100241483	1.00704576
M13028	6B	21092440	0.111091344	0.072164948	99	-0.031562053	-0.002210337	0.12391867	1.537794011
M1472	1B	532773182	0.111109411	0.18556701	99	-0.031562053	-0.002213347	0.098084925	0.964278595
M9263	4A	149057197	0.111136003	0.494845361	99	-0.031562053	-0.002217778	0.099799042	-0.993767108
M13668	6B	462690299	0.111137074	0.195876289	99	-0.031562053	-0.002217956	0.094120526	-0.88364939
M11519	5B	63585667	0.11118808	0.257731959	99	-0.031562053	-0.00222645	0.099151538	0.985329199
M12906	6A	614446534	0.111192522	0.206185567	99	-0.031562053	-0.00222719	0.092744525	-0.857927507
M8646	4A	413875836	0.11119932	0.350515464	99	-0.031562053	-0.002228322	0.097272853	-0.943972467
M2147	1D	416269780	0.111206894	0.12371134	99	-0.031562053	-0.002229582	0.108236866	-1.169292328
M799	1B	28165493	0.111214884	0.268041237	99	-0.031562053	-0.002230912	0.101719091	1.036908268
M11009	5B	428671152	0.111247613	0.453608247	99	-0.031562053	-0.002236359	0.103386797	1.071119347
M2599	2A	81014769	0.111301411	0.360824742	99	-0.031562053	-0.002245308	0.137901034	-1.899424216
M7087	3B	22917259	0.111301411	0.360824742	99	-0.031562053	-0.002245308	0.137901034	-1.899424216
M923	1B	385657223	0.111372642	0.381443299	99	-0.031562053	-0.00225715	0.12714271	1.618784029
M5777	2D	590146863	0.11149657	0.371134021	99	-0.031562053	-0.002277732	0.127887484	-1.633243124
M562	1A	570134003	0.111503202	0.24742268	99	-0.031562053	-0.002278833	0.086995146	0.75909437
M6943	3B	685866256	0.111573183	0.092783505	99	-0.031562053	-0.002290443	0.107961541	1.167859876
M1669	1B	656111729	0.11157418	0.422680412	99	-0.031562053	-0.002290609	0.090963409	-0.825143576
M15596	7B	654860661	0.111582912	0.12371134	99	-0.031562053	-0.002292057	0.10176156	1.03783356
M13414	6B	392948564	0.111889738	0.319587629	99	-0.031562053	-0.002342861	0.089519124	0.803710213
M782	1B	344369943	0.11190594	0.474226804	99	-0.031562053	-0.00234554	0.100063909	1.003624129
M835	1B	19772673	0.111924284	0.381443299	99	-0.031562053	-0.002348571	0.092324386	-0.85003065
M10896	5B	540055568	0.112104685	0.309278351	99	-0.031562053	-0.002378359	0.08983982	0.809497681
M1249	1B	452770206	0.112112598	0.422680412	99	-0.031562053	-0.002379665	0.102719621	1.05751171
M5863	2D	609493877	0.112207932	0.422680412	99	-0.031562053	-0.002395383	0.085235115	0.728897865
M7879	3B	0	0.11231308	0.371134021	99	-0.031562053	-0.002412703	0.133597906	1.78725275
M12423	6A	54772476	0.112479209	0.12371134	99	-0.031562053	-0.00244003	0.110867498	1.23160025
M9157	4A	0	0.112480325	0.195876289	99	-0.031562053	-0.002440213	0.101041792	-1.018504159
M13316	6B	459422335	0.112486719	0.278350515	99	-0.031562053	-0.002441264	0.090098771	-0.809337593
M13352	6B	188000081	0.112628445	0.216494845	99	-0.031562053	-0.00246454	0.099873461	0.99993536
M8324	3D	32335084	0.112773447	0.329896907	99	-0.031562053	-0.002488319	0.090688494	0.824928605
M1826	1B	0	0.112800943	0.360824742	99	-0.031562053	-0.002492825	0.09078019	-0.821611463
M10737	5B	43437349	0.112857178	0.134020619	99	-0.031562053	-0.002502035	0.110266412	1.218370195
M10518	5A	685961373	0.11285988	0.484536082	99	-0.031562053	-0.002502477	0.103377128	1.071185541
M7660	3B	471422001	0.112891926	0.432989691	99	-0.031562053	-0.002507724	0.093296498	0.872931379
M6479	3A	568024952	0.112935104	0.391752577	99	-0.031562053	-0.00251479	0.098040793	0.963714503
M14695	7A	495536921	0.113019948	0.319587629	99	-0.031562053	-0.002528666	0.130508407	-1.700715777
M3339	2A	766578300	0.113177162	0.319587629	99	-0.031562053	-0.002554347	0.117301096	1.378509058
M8467	3D	689501546	0.113309239	0.164948454	99	-0.031562053	-0.002575891	0.102070029	1.044404979
M14198	7A	6351266	0.113329128	0.329896907	99	-0.031562053	-0.002579132	0.086174661	-0.740028082
M12897	6A	470053531	0.113352336	0.474226804	99	-0.031562053	-0.002582914	0.109698182	-1.200786202
M2349	2A	18058853	0.113524141	0.268041237	99	-0.031562053	-0.002610884	0.100250009	1.007617309
M4126	2B	52218686	0.113594969	0.072164948	99	-0.031562053	-0.002622402	0.118936603	-1.411969158
M1146	1B	37570116	0.113634506	0.175257732	99	-0.031562053	-0.002628827	0.099987221	1.002373266
M9171	4A	709851770	0.113654413	0.484536082	99	-0.031562053	-0.002632062	0.108623395	1.182536264
M6249	3A	0	0.113702561	0.226804124	99	-0.031562053	-0.002639881	0.087740424	-0.767198312
M11728	5B	665685766	0.113766941	0.360824742	99	-0.031562053	-0.002650332	0.100577613	-1.008935301
M6114	3A	32420986	0.113934059	0.494845361	99	-0.031562053	-0.002677429	0.08944945	-0.797442983
M8385	3D	284212614	0.114009081	0.443298969	99	-0.031562053	-0.002689579	0.110400653	1.221520004
M10441	5A	275637188	0.114123805	0.463917526	99	-0.031562053	-0.002708141	0.097943961	-0.956593818
M4529	2B	672081113	0.114129354	0.340206186	99	-0.031562053	-0.002709038	0.135949374	1.850932258
M10007	5A	393257332	0.114166001	0.402061856	99	-0.031562053	-0.002714963	0.083975488	-0.702473292
M745	1B	2431679	0.114256433	0.288659794	99	-0.031562053	-0.002729574	0.09874847	-0.972396452
M1675	1B	625466708	0.114284664	0.144329897	99	-0.031562053	-0.002734133	0.101864145	-1.034896268
M4631	2B	719966802	0.114313611	0.474226804	99	-0.031562053	-0.002738805	0.097019472	-0.938538984
M14236	7A	405822737	0.114494258	0.391752577	99	-0.031562053	-0.002767937	0.092307438	-0.84929838
M3794	2B	96381383	0.114499472	0.484536082	99	-0.031562053	-0.002768777	0.104730081	-1.094070213
M13549	6B	664092873	0.114662229	0.103092784	99	-0.031562053	-0.002794979	0.102502145	1.053463944
M4618	2B	316009740	0.114880908	0.453608247	99	-0.031562053	-0.002830117	0.092409839	0.85678795
M14233	7A	10885993	0.114937589	0.288659794	99	-0.031562053	-0.002839213	0.088013318	0.777473632
M3130	2A	751661898	0.115000023	0.154639175	99	-0.031562053	-0.002849226	0.099986362	-0.996878029
M9101	4A	695118747	0.115004039	0.360824742	99	-0.031562053	-0.00284987	0.135156796	1.829585825
M12431	6A	104566919	0.115024274	0.278350515	99	-0.031562053	-0.002853113	0.096887933	-0.935874043
M15474	7B	566408634	0.115058877	0.288659794	99	-0.031562053	-0.002858659	0.095003075	0.905417086
M260	1A	387811947	0.115119899	0.278350515	99	-0.031562053	-0.002868434	0.09118978	0.834426039
M1245	1B	142516772	0.115144625	0.288659794	99	-0.031562053	-0.002872393	0.114635174	1.316994697
M9874	5A	27509864	0.115194448	0.422680412	99	-0.031562053	-0.002880368	0.085317815	-0.725032591
M3406	2B	798223	0.115237191	0.216494845	99	-0.031562053	-0.002887206	0.101876572	1.040770808
M14052	6D	665772921	0.115303279	0.24742268	99	-0.031562053	-0.002897774	0.104856305	-1.096586702
M9413	4A	743748313	0.115305124	0.360824742	99	-0.031562053	-0.002898069	0.099276061	0.988471703
M3674	2B	66667038	0.115395256	0.381443299	99	-0.031562053	-0.002912471	0.086697454	-0.748732382
M647	1A	584104138	0.115402699	0.134020619	99	-0.031562053	-0.002913659	0.094941272	0.904298167
M6391	3A	363608529	0.115452189	0.432989691	99	-0.031562053	-0.002921561	0.103664364	-1.071708483
M14237	7A	64554044	0.115473199	0.463917526	99	-0.031562053	-0.002924914	0.101651971	-1.030387414
M14154	7A	2862136	0.115620242	0.371134021	99	-0.031562053	-0.002948364	0.098922061	0.981505774
M6892	3B	7791132	0.115730566	0.18556701	99	-0.031562053	-0.002965937	0.09078924	0.827234554
M11951	5D	541701594	0.115757582	0.484536082	99	-0.031562053	-0.002970237	0.09576298	0.920025071
M542	1A	123811534	0.115788196	0.432989691	99	-0.031562053	-0.002975108	0.094677535	-0.893408446
M4250	2B	742690889	0.115818513	0.381443299	99	-0.031562053	-0.002979931	0.091990026	0.849196426
M4671	2B	697716067	0.11588847	0.494845361	99	-0.031562053	-0.002991055	0.089869342	0.810640918
M12056	6A	1338546	0.116002507	0.18556701	99	-0.031562053	-0.003009171	0.095842125	0.921580467
M2235	1D	583819101	0.116022569	0.216494845	99	-0.031562053	-0.003012356	0.090025007	0.813462545
M3308	2A	244963962	0.116026868	0.402061856	99	-0.031562053	-0.003013038	0.096413878	-0.926550555
M4603	2B	688434312	0.116043081	0.422680412	99	-0.031562053	-0.003015612	0.085683362	0.737179468
M5322	2B	0	0.116126941	0.381443299	99	-0.031562053	-0.003028916	0.14178504	2.013328679
M3853	2B	76988444	0.116134408	0.350515464	99	-0.031562053	-0.0030301	0.112837457	-1.270199074
M3217	2A	781829002	0.116163418	0.443298969	99	-0.031562053	-0.0030347	0.09721977	-0.942133659
M14310	7A	17286301	0.116247701	0.092783505	99	-0.031562053	-0.003048055	0.111192519	1.23942568
M2303	1D	0	0.116260055	0.360824742	99	-0.031562053	-0.003050012	0.142029151	2.020277978
M9368	4A	9881884	0.116509489	0.432989691	99	-0.031562053	-0.00308947	0.091112967	0.833246744
M12107	6A	586829111	0.116519866	0.381443299	99	-0.031562053	-0.00309111	0.125544671	-1.57305534
M12145	6A	8803926	0.116543137	0.350515464	99	-0.031562053	-0.003094786	0.150068826	-2.248970455
M10469	5A	616523857	0.116573233	0.474226804	99	-0.031562053	-0.003099539	0.098912751	-0.975273698
M11997	5D	553338175	0.116583484	0.484536082	99	-0.031562053	-0.003101157	0.098373768	-0.964638672
M4829	2B	0	0.116596714	0.494845361	99	-0.031562053	-0.003103246	0.098120478	-0.959659572
M7003	3B	17974227	0.116689311	0.360824742	99	-0.031562053	-0.003117857	0.122238247	1.497336771
M8957	4A	661535725	0.11674431	0.175257732	99	-0.031562053	-0.00312653	0.098045478	-0.958165052
M3361	2A	0	0.117095355	0.412371134	99	-0.031562053	-0.003181777	0.112652096	-1.265867699
M12401	6A	28011074	0.117142232	0.391752577	99	-0.031562053	-0.00318914	0.098862477	0.980568075
M1317	1B	505491281	0.117149431	0.402061856	99	-0.031562053	-0.003190271	0.089866738	0.810793322
M8514	3D	361872130	0.117296412	0.319587629	99	-0.031562053	-0.003213335	0.098664778	-0.970260507
M4800	2B	744370715	0.11740906	0.216494845	99	-0.031562053	-0.00323099	0.095655699	0.918232264
M3033	2A	703465896	0.117463619	0.484536082	99	-0.031562053	-0.003239534	0.088412781	0.784921511
M8827	4A	138660384	0.117730458	0.484536082	99	-0.031562053	-0.003281257	0.099480526	-0.986356238
M14843	7A	316013593	0.117831215	0.175257732	99	-0.031562053	-0.003296984	0.097651152	-0.950277766
M14848	7A	677609350	0.117831215	0.175257732	99	-0.031562053	-0.003296984	0.097651152	-0.950277766
M6710	3A	614087671	0.117947194	0.309278351	99	-0.031562053	-0.003315068	0.096180042	-0.921744977
M10568	5B	11773089	0.117972445	0.474226804	99	-0.031562053	-0.003319003	0.105267715	-1.104810189
M3107	2A	740354177	0.117980557	0.237113402	99	-0.031562053	-0.003320267	0.097010122	-0.937776119
M7736	3B	688163825	0.118142287	0.381443299	99	-0.031562053	-0.003345443	0.127701597	-1.627424351
M12414	6A	48048270	0.118205316	0.402061856	99	-0.031562053	-0.003355244	0.08740531	-0.760613579
M12975	6B	2439812	0.118275909	0.453608247	99	-0.031562053	-0.003366215	0.083710319	-0.697375536
M9283	4A	726418793	0.118365341	0.319587629	99	-0.031562053	-0.003380103	0.087927485	-0.769744165
M13963	6D	26988617	0.118529749	0.164948454	99	-0.031562053	-0.003405602	0.106079036	1.128681784
M12494	6A	124916691	0.11859281	0.06185567	99	-0.031562053	-0.003415373	0.128747233	1.661000378
M14514	7A	55205086	0.118649927	0.402061856	99	-0.031562053	-0.003424217	0.093243749	0.872863884
M781	1B	344369943	0.118674088	0.319587629	99	-0.031562053	-0.003427957	0.098533026	-0.967447772
M10970	5B	472662963	0.118718687	0.391752577	99	-0.031562053	-0.003434858	0.083323228	0.697710895
M3344	2A	0	0.118731743	0.082474227	99	-0.031562053	-0.003436877	0.121917674	-1.482955036
M12562	6A	462581310	0.118942804	0.402061856	99	-0.031562053	-0.003469493	0.089263667	-0.793330733
M4967	2B	765220771	0.118968857	0.216494845	99	-0.031562053	-0.003473514	0.08954465	0.805297947
M11004	5B	408219618	0.119059404	0.195876289	99	-0.031562053	-0.003487483	0.102786943	1.060003043
M9526	4B	196094104	0.119088266	0.340206186	99	-0.031562053	-0.003491933	0.131248057	1.726097182
M4765	2B	599789141	0.119120241	0.412371134	99	-0.031562053	-0.003496861	0.104242162	1.090139704
M10625	5B	29125387	0.11914412	0.144329897	99	-0.031562053	-0.003500541	0.104318397	-1.084732256
M4210	2B	144565791	0.119160579	0.24742268	99	-0.031562053	-0.003503077	0.100788958	-1.012338331
M14936	7A	700849927	0.119198933	0.06185567	99	-0.031562053	-0.003508985	0.113367996	1.288739239
M5794	2D	575366522	0.119328341	0.206185567	99	-0.031562053	-0.003528902	0.089293486	0.800861565
M9059	4A	658897630	0.119362763	0.329896907	99	-0.031562053	-0.003534195	0.10301729	-1.057722003
M2191	1D	13863738	0.119397005	0.195876289	99	-0.031562053	-0.00353946	0.116731788	-1.359091574
M6700	3A	505333325	0.119436419	0.402061856	99	-0.031562053	-0.003545517	0.089193378	0.799091392
M10444	5A	473115718	0.119504569	0.18556701	99	-0.031562053	-0.003555986	0.101209809	1.027898522
M1706	1B	548442351	0.1195769	0.051546392	99	-0.031562053	-0.003567089	0.123225631	1.522022708
M9349	4A	738890239	0.119595461	0.422680412	99	-0.031562053	-0.003569937	0.09746995	0.953609051
M8230	3B	282235521	0.119654203	0.216494845	99	-0.031562053	-0.003578947	0.108130028	-1.16563134
M14712	7A	519254464	0.119658954	0.453608247	99	-0.031562053	-0.003579676	0.088932854	-0.787325576
M1833	1B	660431361	0.119783671	0.453608247	99	-0.031562053	-0.003598788	0.096901702	-0.935395198
M11859	5B	703899766	0.119784397	0.474226804	99	-0.031562053	-0.003598899	0.103537752	1.075605501
M7102	3B	0	0.119864769	0.082474227	99	-0.031562053	-0.003611204	0.107013127	1.148792133
M11075	5B	592867962	0.119888312	0.06185567	99	-0.031562053	-0.003614807	0.118926433	1.417964453
M10465	5A	0	0.119891199	0.474226804	99	-0.031562053	-0.003615249	0.104972896	1.105546138
M4507	2B	690747730	0.119933072	0.474226804	99	-0.031562053	-0.003621654	0.093160715	0.871513531
M10410	5A	690860803	0.11994142	0.18556701	99	-0.031562053	-0.003622931	0.094448931	-0.88843712
M8443	3D	549126529	0.119999071	0.226804124	99	-0.031562053	-0.003631745	0.097570574	0.955633441
M10377	5A	569288642	0.120032282	0.432989691	99	-0.031562053	-0.00363682	0.099743061	-0.991231011
M452	1A	0	0.120069236	0.175257732	99	-0.031562053	-0.003642466	0.097684293	0.95786457
M6432	3A	509564298	0.120092915	0.020618557	99	-0.031562053	-0.003646083	0.149469387	-2.230463681
M7982	3B	763454895	0.120092915	0.020618557	99	-0.031562053	-0.003646083	0.149225253	2.230463681
M1332	1B	505061911	0.120096189	0.360824742	99	-0.031562053	-0.003646583	0.089841591	0.810797733
M6696	3A	711289967	0.120181345	0.319587629	99	-0.031562053	-0.003659582	0.095535538	0.91636348
M9138	4A	23511186	0.120199667	0.092783505	99	-0.031562053	-0.003662377	0.112054824	1.259290733
M13546	6B	479212545	0.120219375	0.144329897	99	-0.031562053	-0.003665384	0.098664276	0.977129328
M9228	4A	731340115	0.120309804	0.319587629	99	-0.031562053	-0.003679171	0.086381547	-0.742497999
M11046	5B	419031153	0.12033156	0.206185567	99	-0.031562053	-0.003682487	0.093388176	-0.868452656
M1505	1B	57318239	0.120354824	0.443298969	99	-0.031562053	-0.003686031	0.105876718	-1.11730192
M7081	3B	0	0.120667084	0.412371134	99	-0.031562053	-0.003733531	0.084693788	0.721037298
M1372	1B	405488003	0.120672717	0.298969072	99	-0.031562053	-0.003734387	0.098034641	0.964813461
M1787	1B	608599570	0.120722336	0.041237113	99	-0.031562053	-0.003741922	0.125645356	-1.574933624
M10726	5B	305655587	0.120727548	0.319587629	99	-0.031562053	-0.003742713	0.096873902	0.942198011
M3878	2B	417215705	0.120818454	0.092783505	99	-0.031562053	-0.003756508	0.113937064	1.301921973
M8679	4A	157557592	0.12098459	0.092783505	99	-0.031562053	-0.003781688	0.110621295	1.227488769
M2219	1D	438024561	0.121013643	0.206185567	99	-0.031562053	-0.003786088	0.101726378	1.038611684
M14681	7A	138247000	0.121042231	0.412371134	99	-0.031562053	-0.003790416	0.098320045	0.970473531
M5009	2B	752394623	0.121107292	0.340206186	99	-0.031562053	-0.003800261	0.100661248	1.017068936
M2834	2A	177899477	0.121236201	0.484536082	99	-0.031562053	-0.00381975	0.094131762	0.889898612
M6590	3A	174036118	0.121350408	0.360824742	99	-0.031562053	-0.003836997	0.096387171	0.932885677
M9114	4A	701293979	0.1213925	0.12371134	99	-0.031562053	-0.003843349	0.104653986	1.09908902
M12472	6A	166800871	0.121494893	0.164948454	99	-0.031562053	-0.00385879	0.095785604	0.921346975
M9928	5A	346214767	0.121605831	0.237113402	99	-0.031562053	-0.003875503	0.090656248	-0.817980021
M7516	3B	74352754	0.12166867	0.164948454	99	-0.031562053	-0.003884963	0.102305193	-1.042750282
M10354	5A	513747652	0.121694562	0.18556701	99	-0.031562053	-0.003888859	0.100278659	1.00946981
M4391	2B	561223406	0.121727021	0.237113402	99	-0.031562053	-0.003893742	0.100318158	1.010267023
M14472	7A	263797478	0.121800841	0.24742268	99	-0.031562053	-0.003904841	0.09680592	-0.933233768
M2870	2A	553276886	0.121880349	0.175257732	99	-0.031562053	-0.003916787	0.098129136	0.96684953
M5755	2D	587370416	0.121916107	0.494845361	99	-0.031562053	-0.003922157	0.086420477	-0.742927724
M4942	2B	762091833	0.122079527	0.041237113	99	-0.031562053	-0.003946676	0.12536097	1.575483947
M2803	2A	109064436	0.12213122	0.24742268	99	-0.031562053	-0.003954424	0.086929977	0.759636519
M12449	6A	431192916	0.12250835	0.391752577	99	-0.031562053	-0.004010838	0.128953911	1.666921944
M331	1A	474702375	0.122546499	0.319587629	99	-0.031562053	-0.004016534	0.169135152	2.864686507
M12797	6A	599245307	0.122551335	0.340206186	99	-0.031562053	-0.004017256	0.092316258	0.856246407
M5197	2B	647814104	0.122720409	0.051546392	99	-0.031562053	-0.004042474	0.123866685	-1.530253083
M12959	6B	10659520	0.122780844	0.443298969	99	-0.031562053	-0.004051478	0.101373176	-1.023600604
M11677	5B	617600683	0.122781873	0.041237113	99	-0.031562053	-0.004051632	0.143067163	2.050872954
M7950	3B	0	0.122869933	0.371134021	99	-0.031562053	-0.004064743	0.092026769	0.85095737
M8504	3D	603669558	0.12296008	0.237113402	99	-0.031562053	-0.004078155	0.095346822	0.913179795
M5729	2D	716052552	0.122987169	0.422680412	99	-0.031562053	-0.004082183	0.08484635	0.723972489
M9528	4B	410992756	0.12302933	0.371134021	99	-0.031562053	-0.00408845	0.129242411	-1.666271618
M9529	4B	537435483	0.12302933	0.371134021	99	-0.031562053	-0.00408845	0.128925683	1.666271618
M15594	7B	323793011	0.12304886	0.195876289	99	-0.031562053	-0.004091352	0.090129839	-0.808247433
M11464	5B	243695786	0.123091399	0.216494845	99	-0.031562053	-0.004097672	0.093291865	0.874434884
M4932	2B	752403414	0.123113474	0.391752577	99	-0.031562053	-0.00410095	0.091334312	-0.830094698
M12639	6A	574526055	0.123126169	0.175257732	99	-0.031562053	-0.004102835	0.108555799	-1.174333303
M7426	3B	237976322	0.123572938	0.360824742	99	-0.031562053	-0.004169039	0.108829598	1.188557188
M4180	2B	75627521	0.123585664	0.051546392	99	-0.031562053	-0.004170921	0.121277741	1.47499997
M8235	3B	187625882	0.123589641	0.402061856	99	-0.031562053	-0.004171509	0.08654284	0.753137822
M9658	4B	661632694	0.123595404	0.484536082	99	-0.031562053	-0.004172361	0.087477153	0.769397598
M1907	1B	677573018	0.12363116	0.402061856	99	-0.031562053	-0.004177646	0.095889323	-0.915298582
M10640	5B	33179820	0.123632718	0.24742268	99	-0.031562053	-0.004177877	0.098265806	-0.96143899
M13084	6B	14484152	0.123687712	0.494845361	99	-0.031562053	-0.004186003	0.10020171	-0.999852273
M4357	2B	190370249	0.12375829	0.494845361	99	-0.031562053	-0.004196426	0.100058609	-0.996976089
M4698	2B	594098170	0.123847661	0.402061856	99	-0.031562053	-0.004209614	0.10039672	-1.003740534
M15301	7B	112021624	0.123881104	0.195876289	99	-0.031562053	-0.004214546	0.104335948	-1.084384463
M14928	7A	700509978	0.123936468	0.113402062	99	-0.031562053	-0.004222709	0.115626304	-1.332721498
M1754	1B	636316329	0.123953844	0.041237113	99	-0.031562053	-0.00422527	0.125683461	1.583858511
M5374	2D	13599129	0.123977941	0.12371134	99	-0.031562053	-0.00422882	0.100296706	-1.00171411
M11258	5B	57635475	0.12415139	0.278350515	99	-0.031562053	-0.004254356	0.096060135	-0.918500601
M8489	3D	115087655	0.124224762	0.340206186	99	-0.031562053	-0.004265145	0.101312834	-1.022163882
M4331	2B	410189157	0.124303239	0.422680412	99	-0.031562053	-0.004276678	0.086434092	0.751361908
M2617	2A	355706503	0.124342601	0.432989691	99	-0.031562053	-0.004282459	0.094164418	0.890976218
M11452	5B	651409879	0.124353641	0.072164948	99	-0.031562053	-0.00428408	0.108187515	-1.166169763
M12473	6A	424016956	0.124387432	0.432989691	99	-0.031562053	-0.004289041	0.084071672	-0.702515556
M6054	3A	5005220	0.12442014	0.195876289	99	-0.031562053	-0.004293841	0.093461696	0.877802713
M8169	3B	815282731	0.124466037	0.443298969	99	-0.031562053	-0.004300575	0.094069481	0.889207303
M1690	1B	612865939	0.124535835	0.494845361	99	-0.031562053	-0.00431081	0.089373113	-0.794444524
M8373	3D	108272571	0.124590724	0.463917526	99	-0.031562053	-0.004318855	0.101878175	-1.033597396
M3371	2A	0	0.124633494	0.371134021	99	-0.031562053	-0.00432512	0.093028735	0.869759679
M9166	4A	710830242	0.12465534	0.164948454	99	-0.031562053	-0.004328319	0.096340635	-0.923823472
M9948	5A	46628073	0.124681998	0.412371134	99	-0.031562053	-0.004332222	0.092198569	-0.845725389
M3432	2B	172205833	0.124730631	0.072164948	99	-0.031562053	-0.004339341	0.108889508	-1.181353146
M12292	6A	17317261	0.124858995	0.237113402	99	-0.031562053	-0.004358114	0.088846647	-0.785014555
M3437	2B	13755354	0.124859331	0.463917526	99	-0.031562053	-0.004358163	0.098300297	-0.961936682
M320	1A	471700683	0.124884512	0.24742268	99	-0.031562053	-0.004361843	0.09191658	0.84922762
M1284	1B	392145668	0.125214712	0.257731959	99	-0.031562053	-0.004410023	0.096664911	0.938820517
M10222	5A	503872534	0.125216971	0.041237113	99	-0.031562053	-0.004410352	0.119597753	-1.425951889
M13837	6B	720519099	0.125256154	0.412371134	99	-0.031562053	-0.00441606	0.093391954	-0.867789645
M11314	5B	422210751	0.125281363	0.082474227	99	-0.031562053	-0.004419731	0.109637005	1.206447023
M147	1A	25807423	0.125297396	0.484536082	99	-0.031562053	-0.004422066	0.097175837	-0.93989227
M10609	5B	0	0.125301803	0.494845361	99	-0.031562053	-0.004422707	0.104107583	-1.079416166
M7855	3B	755711290	0.125328479	0.082474227	99	-0.031562053	-0.00442659	0.106372048	-1.127074673
M1816	1B	656423079	0.125393641	0.195876289	99	-0.031562053	-0.004436072	0.092953235	-0.85959431
M12076	6A	5480595	0.125605421	0.144329897	99	-0.031562053	-0.004466848	0.101965341	1.044159927
M3416	2B	576927862	0.125631737	0.350515464	99	-0.031562053	-0.004470668	0.091616219	-0.834882485
M13251	6B	128193460	0.125791601	0.422680412	99	-0.031562053	-0.004493856	0.088849759	0.793921823
M6002	2D	636354137	0.125814746	0.309278351	99	-0.031562053	-0.00449721	0.089623092	-0.798732657
M15225	7B	474475078	0.125874634	0.350515464	99	-0.031562053	-0.004505886	0.093881334	-0.8768646
M9178	4A	25353003	0.12594082	0.103092784	99	-0.031562053	-0.004515469	0.118605316	1.411237568
M3590	2B	38132859	0.125965545	0.257731959	99	-0.031562053	-0.004519048	0.087553633	-0.762044809
M3847	2B	78508701	0.126064962	0.422680412	99	-0.031562053	-0.004533429	0.087762136	-0.765685826
M7040	3B	17613543	0.126160562	0.360824742	99	-0.031562053	-0.004547245	0.087104076	0.763259243
M4625	2B	599925082	0.126243374	0.453608247	99	-0.031562053	-0.004559204	0.102257431	-1.041099016
M5874	2D	601406100	0.126298535	0.350515464	99	-0.031562053	-0.004567165	0.099495309	-0.985364496
M2182	1D	424727025	0.126307334	0.453608247	99	-0.031562053	-0.004568434	0.115258636	1.333023759
M464	1A	536653752	0.126366461	0.206185567	99	-0.031562053	-0.004576963	0.097628286	0.95770519
M5350	2B	797277976	0.126417552	0.134020619	99	-0.031562053	-0.004584328	0.10149628	1.034733817
M10566	5B	10288635	0.126534298	0.463917526	99	-0.031562053	-0.004601146	0.093873891	-0.87662959
M3697	2B	68756048	0.126551242	0.103092784	99	-0.031562053	-0.004603585	0.101660478	1.038088864
M12831	6A	604445823	0.126618024	0.309278351	99	-0.031562053	-0.004613197	0.129274757	-1.66658308
M9900	5A	32190209	0.126663351	0.082474227	99	-0.031562053	-0.004619717	0.115816359	1.345962625
M11687	5B	635091271	0.126696243	0.402061856	99	-0.031562053	-0.004624446	0.112077333	-1.251508415
M4425	2B	544170551	0.126703266	0.278350515	99	-0.031562053	-0.004625456	0.095202803	0.910982819
M9821	4D	28786956	0.12672378	0.12371134	99	-0.031562053	-0.004628405	0.098191583	0.968787095
M12681	6A	271010546	0.126926975	0.443298969	99	-0.031562053	-0.004657585	0.106796283	1.145202182
M5991	2D	641004884	0.126978927	0.340206186	99	-0.031562053	-0.004665038	0.097088481	0.947282346
M9447	4B	4892979	0.126984786	0.494845361	99	-0.031562053	-0.004665878	0.10564073	1.120662258
M2167	1D	423928525	0.126993276	0.371134021	99	-0.031562053	-0.004667095	0.125047729	-1.559026357
M11964	5D	531606683	0.127075255	0.371134021	99	-0.031562053	-0.004678846	0.088157472	-0.772495137
M2244	1D	462948307	0.127107777	0.175257732	99	-0.031562053	-0.004683506	0.094908142	0.905439051
M2263	1D	472374775	0.127151155	0.443298969	99	-0.031562053	-0.004689718	0.116693868	-1.357056175
M7041	3B	429358404	0.12717196	0.391752577	99	-0.031562053	-0.004692697	0.088769338	-0.783306847
M7360	3B	143666791	0.127191631	0.216494845	99	-0.031562053	-0.004695513	0.093728424	-0.873806232
M10563	5B	11085155	0.127213619	0.463917526	99	-0.031562053	-0.00469866	0.099596194	0.996638844
M3981	2B	0	0.127358565	0.164948454	99	-0.031562053	-0.00471939	0.092591885	-0.852606323
M9048	4A	654345599	0.127371766	0.463917526	99	-0.031562053	-0.004721277	0.098516957	-0.965837797
M9163	4A	348257403	0.127444589	0.432989691	99	-0.031562053	-0.004731681	0.10823507	1.176214713
M7777	3B	711641981	0.127550693	0.474226804	99	-0.031562053	-0.004746828	0.087385333	-0.758872817
M730	1B	3163197	0.127734866	0.12371134	99	-0.031562053	-0.004773085	0.096479193	0.935596554
M14813	7A	635682971	0.127800582	0.484536082	99	-0.031562053	-0.004782444	0.099882112	-0.992861187
M13407	6B	512060987	0.127809963	0.453608247	99	-0.031562053	-0.004783779	0.099237528	-0.980024926
M5802	2D	729134384	0.127816323	0.402061856	99	-0.031562053	-0.004784685	0.097228169	0.950116368
M1316	1B	184220516	0.127816402	0.422680412	99	-0.031562053	-0.004784696	0.1056603	-1.111625211
M1438	1B	790223846	0.127832659	0.298969072	99	-0.031562053	-0.00478701	0.092094474	0.852926216
M1617	1B	628627682	0.127874289	0.340206186	99	-0.031562053	-0.004792934	0.086692017	-0.746757643
M13587	6B	676372364	0.127947961	0.463917526	99	-0.031562053	-0.004803413	0.085453343	0.735030801
M3171	2A	648163092	0.127969162	0.453608247	99	-0.031562053	-0.004806427	0.097995663	0.965121423
M351	1A	493935558	0.12797516	0.319587629	99	-0.031562053	-0.004807279	0.104263026	-1.082270579
M12796	6A	599622814	0.128124298	0.391752577	99	-0.031562053	-0.004828466	0.102096176	-1.037534454
M8502	3D	429704139	0.128166573	0.391752577	99	-0.031562053	-0.004834466	0.102590056	-1.047637486
M583	1A	0	0.128306733	0.412371134	99	-0.031562053	-0.004854344	0.107154599	-1.143356472
M5053	2B	0	0.128545142	0.443298969	99	-0.031562053	-0.004888099	0.088916585	0.795504002
M13110	6B	39809227	0.128609813	0.422680412	99	-0.031562053	-0.004897244	0.086753241	-0.747715243
M450	1A	532773229	0.128667391	0.175257732	99	-0.031562053	-0.004905381	0.092392906	0.858550296
M2640	2A	82187693	0.128807113	0.402061856	99	-0.031562053	-0.004925109	0.116983597	-1.363591097
M6926	3B	8262440	0.128819852	0.484536082	99	-0.031562053	-0.004926907	0.093535247	0.879811147
M11189	5B	425653407	0.128870763	0.103092784	99	-0.031562053	-0.004934089	0.101931622	1.043939648
M2350	2A	18058853	0.128995792	0.412371134	99	-0.031562053	-0.004951712	0.104352332	-1.083989202
M5750	2D	588454274	0.12899705	0.268041237	99	-0.031562053	-0.00495189	0.095802822	-0.912866181
M3372	2A	0	0.129039297	0.257731959	99	-0.031562053	-0.00495784	0.091896377	0.849452249
M12789	6A	599169953	0.129095424	0.463917526	99	-0.031562053	-0.004965743	0.096670523	0.939484738
M5910	2D	615707186	0.129157766	0.144329897	99	-0.031562053	-0.004974515	0.099761879	-0.990268743
M8865	4A	12656052	0.129202792	0.020618557	99	-0.031562053	-0.004980848	0.148762093	-2.20803517
M9849	5A	27470847	0.129221457	0.350515464	99	-0.031562053	-0.004983473	0.148569158	-2.202295986
M13191	6B	77434370	0.129282226	0.103092784	99	-0.031562053	-0.004992015	0.10293048	-1.054476354
M11634	5B	0	0.129512791	0.092783505	99	-0.031562053	-0.005024382	0.111708705	1.252907853
M14063	6D	452586453	0.129678717	0.12371134	99	-0.031562053	-0.005047636	0.110037606	-1.205779838
M9669	4B	666331476	0.129692605	0.432989691	99	-0.031562053	-0.00504958	0.0922962	0.856908443
M3088	2A	742581040	0.129739812	0.226804124	99	-0.031562053	-0.005056189	0.098961096	-0.97427366
M3040	2A	719468993	0.129817555	0.319587629	99	-0.031562053	-0.005067067	0.094037379	-0.879235805
M8075	3B	590943948	0.129838029	0.391752577	99	-0.031562053	-0.00506993	0.092247512	0.856030278
M4544	2B	0	0.129840975	0.340206186	99	-0.031562053	-0.005070342	0.085992869	0.7445477
M1607	1B	434594722	0.129846326	0.391752577	99	-0.031562053	-0.00507109	0.09348068	-0.868792668
M1759	1B	639426236	0.129986576	0.350515464	99	-0.031562053	-0.00509069	0.105089256	-1.099284485
M9167	4A	706549986	0.130023766	0.051546392	99	-0.031562053	-0.005095884	0.11535695	1.335818468
M6889	3B	43544653	0.130043361	0.463917526	99	-0.031562053	-0.005098619	0.104604545	-1.089112454
M14958	7A	83500014	0.130106651	0.453608247	99	-0.031562053	-0.005107452	0.090088328	-0.806483236
M7210	3B	130618089	0.130247594	0.432989691	99	-0.031562053	-0.005127104	0.091849598	-0.838507753
M7470	3B	222247260	0.130251721	0.412371134	99	-0.031562053	-0.005127679	0.082092231	0.679041112
M8098	3B	702728099	0.130425344	0.164948454	99	-0.031562053	-0.005151854	0.09339841	-0.867174445
M5043	2B	754864756	0.13046874	0.340206186	99	-0.031562053	-0.005157891	0.134295642	-1.798374053
M15076	7A	717597472	0.130490097	0.298969072	99	-0.031562053	-0.005160861	0.093748446	0.884037978
M5506	2D	77635178	0.130540556	0.412371134	99	-0.031562053	-0.005167876	0.097349919	0.952868546
M2652	2A	609023391	0.130604232	0.360824742	99	-0.031562053	-0.005176724	0.130773408	1.715345141
M513	1A	544430459	0.130650644	0.494845361	99	-0.031562053	-0.00518317	0.091726445	0.846557237
M581	1A	0	0.130845576	0.195876289	99	-0.031562053	-0.005210216	0.096848253	0.94316863
M7281	3B	48788274	0.130849346	0.340206186	99	-0.031562053	-0.005210738	0.092957134	0.869313606
M829	1B	441543004	0.130858538	0.412371134	99	-0.031562053	-0.005212013	0.106677909	1.143229646
M11632	5B	600131092	0.130903381	0.402061856	99	-0.031562053	-0.005218227	0.118824946	1.417155
M4820	2B	725608761	0.131010605	0.18556701	99	-0.031562053	-0.005233077	0.095901244	-0.914471789
M1705	1B	548442351	0.131026325	0.484536082	99	-0.031562053	-0.005235253	0.098121707	0.968022189
M13501	6B	600289035	0.131098119	0.360824742	99	-0.031562053	-0.005245187	0.133087056	1.776461638
[truncated: 13,601 more rows]
