# Supplementary material for: Genome-wide association study of drought tolerance and biomass allocation in wheat
Source: PLoS One. 2019 Dec 4;14(12):e0225383. doi: 10.1371/journal.pone.0225383 (PMC6892492; doi:10.1371/journal.pone.0225383)
Supplement: S6 Table — (CSV) [file pone.0225383.s006.csv]

SNP	Chromosome	Position	P.value	maf	nobs	Rsquare.of.Model.without.SNP	Rsquare.of.Model.with.SNP	FDR_Adjusted_P-values	effect
M3664	2B	59764104	2.73E-05	0.051546392	99	0.159172587	0.339805493	0.042897507	-6.4778771
M13563	6B	663760681	3.15E-05	0.041237113	99	0.159172587	0.336790529	0.042897507	-7.507905909
M3989	2B	126899677	9.39E-05	0.350515464	99	0.159172587	0.313700914	0.058520279	-6.098414835
M3717	2B	77176639	0.000132162	0.402061856	99	0.159172587	0.306622218	0.058520279	5.237851038
M1626	1B	614701448	0.000136555	0.144329897	99	0.159172587	0.305948566	0.058520279	3.712729551
M9936	5A	79280510	0.000149954	0.402061856	99	0.159172587	0.304023592	0.058520279	4.96707921
M5902	2D	606129207	0.000195474	0.463917526	99	0.159172587	0.298598976	0.058520279	-3.880299627
M4117	2B	0	0.000214981	0.020618557	99	0.159172587	0.296662436	0.058520279	-8.729332778
M3353	2A	766445675	0.00022266	0.350515464	99	0.159172587	0.295949254	0.058520279	-8.745552708
M3887	2B	0	0.00022266	0.350515464	99	0.159172587	0.295949254	0.058520279	-8.745552708
M4159	2B	154633225	0.000236055	0.494845361	99	0.159172587	0.294763662	0.058520279	3.849065064
M5922	2D	695112271	0.000309367	0.432989691	99	0.159172587	0.289300909	0.061232316	-4.152566733
M3700	2B	568415591	0.000336237	0.391752577	99	0.159172587	0.287627246	0.061232316	6.583642809
M3725	2B	72918645	0.000336237	0.391752577	99	0.159172587	0.287627246	0.061232316	6.583642809
M4155	2B	107028709	0.000336811	0.381443299	99	0.159172587	0.287593001	0.061232316	5.362719879
M3627	2B	419250140	0.000373662	0.402061856	99	0.159172587	0.285512423	0.063686094	5.2508741
M4017	2B	535286874	0.000413701	0.030927835	99	0.159172587	0.283478885	0.066362507	-6.279087443
M3723	2B	149684945	0.000470532	0.371134021	99	0.159172587	0.280916139	0.067533765	-6.305337531
M4135	2B	347472378	0.000470532	0.371134021	99	0.159172587	0.280916139	0.067533765	-6.305337531
M3726	2B	72918645	0.000537529	0.041237113	99	0.159172587	0.278276254	0.071251363	6.133428623
M7736	3B	688163825	0.000583548	0.381443299	99	0.159172587	0.276652527	0.071251363	-5.772051032
M1627	1B	144111278	0.00059674	0.432989691	99	0.159172587	0.276211334	0.071251363	4.134723062
M9754	4D	80836783	0.000600947	0.402061856	99	0.159172587	0.276072774	0.071251363	-6.192035431
M15111	7A	718204695	0.000780541	0.257731959	99	0.159172587	0.270935916	0.085142617	2.732568921
M9119	4A	25288905	0.000780552	0.371134021	99	0.159172587	0.270935649	0.085142617	-6.092184725
M3808	3B	0	0.000824382	0.12371134	99	0.159172587	0.269867648	0.085763463	-3.264427053
M11146	5B	502377352	0.000875874	0.020618557	99	0.159172587	0.268685331	0.085763463	7.023445567
M10970	5B	472662963	0.000921267	0.391752577	99	0.159172587	0.267701087	0.085763463	2.208997276
M14665	7A	112180967	0.00096521	0.154639175	99	0.159172587	0.266794816	0.085763463	2.873102517
M15155	7A	729332254	0.000967282	0.340206186	99	0.159172587	0.266753145	0.085763463	5.449727073
M11770	5B	683000490	0.001092457	0.381443299	99	0.159172587	0.264392746	0.085763463	-5.386464998
M11743	5B	680852435	0.001092457	0.381443299	99	0.159172587	0.264392746	0.085763463	5.386464998
M1618	1B	628627682	0.001157347	0.474226804	99	0.159172587	0.26327681	0.085763463	2.664007529
M4146	2B	184403011	0.001193981	0.164948454	99	0.159172587	0.262674966	0.085763463	4.012395814
M11784	5B	682399214	0.001260831	0.051546392	99	0.159172587	0.261624332	0.085763463	-5.2151733
M15481	7B	0	0.001268719	0.175257732	99	0.159172587	0.261504177	0.085763463	2.503746593
M8123	3B	322735845	0.001270279	0.381443299	99	0.159172587	0.261480498	0.085763463	5.675993886
M3987	2B	159210768	0.001299471	0.329896907	99	0.159172587	0.261042983	0.085763463	-3.824691421
M1476	1B	544133182	0.001314934	0.257731959	99	0.159172587	0.260815323	0.085763463	3.827721028
M5603	2D	551361616	0.001338164	0.484536082	99	0.159172587	0.260478451	0.085763463	2.964467835
M3680	2B	38442340	0.001392187	0.082474227	99	0.159172587	0.259717836	0.08628395	4.643807359
M15540	7B	642273695	0.001451421	0.164948454	99	0.159172587	0.258918133	0.08795611	-2.650195469
M7485	3B	495521725	0.001503094	0.051546392	99	0.159172587	0.258247576	0.089107334	4.145936069
M5903	2D	612184445	0.001580945	0.402061856	99	0.159172587	0.25728101	0.091728445	-3.979620179
M5880	2D	605350061	0.00165751	0.206185567	99	0.159172587	0.256377242	0.094167268	2.556031549
M3696	2B	69066012	0.001840476	0.103092784	99	0.159172587	0.254381416	0.09704291	3.847390609
M5914	2D	606124230	0.001852456	0.134020619	99	0.159172587	0.254257987	0.09704291	3.617551926
M3851	2B	92221173	0.001885681	0.402061856	99	0.159172587	0.25391992	0.09704291	-4.553634642
M11753	5B	678708672	0.00200027	0.371134021	99	0.159172587	0.252799516	0.09704291	-5.445208784
M11794	5B	656472011	0.00200027	0.371134021	99	0.159172587	0.252799516	0.09704291	-5.445208784
M11761	5B	681979338	0.00200027	0.371134021	99	0.159172587	0.252799516	0.09704291	5.445208784
M11787	5B	688224445	0.00200027	0.371134021	99	0.159172587	0.252799516	0.09704291	5.445208784
M9114	4A	701293979	0.002016324	0.12371134	99	0.159172587	0.25264787	0.09704291	3.694097748
M11075	5B	592867962	0.002140498	0.06185567	99	0.159172587	0.251515473	0.09704291	3.979816423
M11793	5B	656472011	0.002141263	0.041237113	99	0.159172587	0.251508715	0.09704291	-5.335766779
M11744	5B	680852435	0.002141263	0.041237113	99	0.159172587	0.251508715	0.09704291	5.335766778
M11776	5B	684700913	0.002141263	0.041237113	99	0.159172587	0.251508715	0.09704291	5.335766778
M15545	7B	641684991	0.00218301	0.474226804	99	0.159172587	0.251143348	0.09704291	3.701703628
M11795	5B	625779199	0.002206329	0.051546392	99	0.159172587	0.250942394	0.09704291	4.550116473
M8185	3B	820905679	0.002291486	0.113402062	99	0.159172587	0.250226791	0.09918859	3.900826488
M3688	2B	38782061	0.002424688	0.226804124	99	0.159172587	0.249160867	0.101081796	2.791340098
M3703	2B	66559474	0.002498312	0.319587629	99	0.159172587	0.248597421	0.101081796	-3.212989329
M9244	4A	719933935	0.002554456	0.402061856	99	0.159172587	0.24817918	0.101081796	2.105636942
M11860	5B	703899766	0.002591591	0.216494845	99	0.159172587	0.247907751	0.101081796	3.645410757
M1798	1B	646777010	0.002654979	0.020618557	99	0.159172587	0.247453592	0.101081796	-5.294211079
M3934	2B	657506318	0.002664581	0.463917526	99	0.159172587	0.247385778	0.101081796	-3.113435768
M5042	2B	749345224	0.002763625	0.494845361	99	0.159172587	0.246700693	0.101081796	-2.134964061
M7900	3B	752274170	0.002842148	0.371134021	99	0.159172587	0.246175386	0.101081796	-4.407528727
M7949	3B	0	0.002842148	0.371134021	99	0.159172587	0.246175386	0.101081796	-4.407528727
M9105	4A	694752853	0.002944001	0.319587629	99	0.159172587	0.245515974	0.101081796	4.08013131
M3791	2B	77236275	0.002951667	0.103092784	99	0.159172587	0.245467302	0.101081796	3.617113038
M9313	4A	730004142	0.003105297	0.18556701	99	0.159172587	0.244518603	0.101081796	2.534081022
M4105	2B	510796274	0.003112072	0.371134021	99	0.159172587	0.244477892	0.101081796	-5.137967107
M4145	2B	184403011	0.003180992	0.463917526	99	0.159172587	0.244068912	0.101081796	3.731766992
M10850	5B	664263082	0.003181529	0.030927835	99	0.159172587	0.244065759	0.101081796	5.156544269
M3708	2B	293132103	0.003251753	0.154639175	99	0.159172587	0.243658449	0.101081796	-2.738401255
M11759	5B	681127665	0.003277997	0.494845361	99	0.159172587	0.243508561	0.101081796	3.305721215
M3511	2B	15410111	0.003288238	0.381443299	99	0.159172587	0.24345041	0.101081796	4.838949327
M10864	5B	422121027	0.003355404	0.360824742	99	0.159172587	0.243073619	0.101081796	5.13079856
M1785	1B	646178482	0.003501675	0.268041237	99	0.159172587	0.242279425	0.101081796	2.198534584
M2919	2A	683536395	0.003692936	0.24742268	99	0.159172587	0.241291349	0.101081796	-2.483241409
M10478	5A	613546871	0.003733453	0.453608247	99	0.159172587	0.241088852	0.101081796	-2.103160511
M12225	6A	17652529	0.003773855	0.340206186	99	0.159172587	0.240889188	0.101081796	-2.995438355
M13097	6B	26841451	0.003778711	0.298969072	99	0.159172587	0.240865341	0.101081796	-2.979374785
M3834	2B	69275351	0.003824371	0.484536082	99	0.159172587	0.240642637	0.101081796	3.222739385
M9165	4A	710830242	0.003829202	0.257731959	99	0.159172587	0.240619237	0.101081796	2.737680916
M11995	5D	548844664	0.003852616	0.391752577	99	0.159172587	0.240506256	0.101081796	-2.160328838
M6540	3A	662527377	0.003854999	0.288659794	99	0.159172587	0.240494796	0.101081796	-1.962933862
M7701	3B	675030662	0.003951932	0.381443299	99	0.159172587	0.240034803	0.101081796	-4.095222726
M7882	3B	740106785	0.004055065	0.092783505	99	0.159172587	0.239558067	0.101081796	-2.617308693
M11740	5B	676094493	0.004214773	0.371134021	99	0.159172587	0.238844097	0.101081796	5.284949765
M6189	3A	425085428	0.004217515	0.226804124	99	0.159172587	0.238832088	0.101081796	2.612418816
M9088	4A	697825160	0.004279336	0.144329897	99	0.159172587	0.238563408	0.101081796	-3.21027769
M10270	5A	434483981	0.004449379	0.164948454	99	0.159172587	0.237844682	0.101081796	-2.739931997
M7428	3B	303590858	0.004457432	0.154639175	99	0.159172587	0.237811356	0.101081796	2.245299304
M9066	4A	590854832	0.004475203	0.020618557	99	0.159172587	0.237738029	0.101081796	-6.300158259
M9079	4A	692084397	0.004475203	0.020618557	99	0.159172587	0.237738029	0.101081796	-6.300158259
M9086	4A	690887990	0.004475203	0.020618557	99	0.159172587	0.237738029	0.101081796	-6.300158259
M9132	4A	236257089	0.004475203	0.020618557	99	0.159172587	0.237738029	0.101081796	-6.300158259
M10127	5A	461008994	0.004475203	0.020618557	99	0.159172587	0.237738029	0.101081796	6.300158259
M3600	2B	298962243	0.004475203	0.020618557	99	0.159172587	0.237738029	0.101081796	6.300158259
M3760	2B	434731139	0.004475203	0.020618557	99	0.159172587	0.237738029	0.101081796	6.300158259
M9099	4A	220162554	0.004475203	0.020618557	99	0.159172587	0.237738029	0.101081796	6.300158259
M9125	4A	236257343	0.004475203	0.020618557	99	0.159172587	0.237738029	0.101081796	6.300158259
M9130	4A	702149172	0.004475203	0.020618557	99	0.159172587	0.237738029	0.101081796	6.300158259
M5927	2D	618309251	0.004505462	0.134020619	99	0.159172587	0.237613874	0.101081796	-3.199774955
M10883	5B	520209151	0.004531052	0.340206186	99	0.159172587	0.237509548	0.101081796	1.935931927
M6057	3A	8862385	0.004594769	0.195876289	99	0.159172587	0.237252422	0.101081796	-2.146084536
M3920	2B	158649496	0.004742186	0.010309278	99	0.159172587	0.236671456	0.101081796	-8.155619771
M14343	7A	17252435	0.004742186	0.010309278	99	0.159172587	0.236671456	0.101081796	8.155619771
M14097	6D	461702450	0.004750238	0.020618557	99	0.159172587	0.236640264	0.101081796	6.645444148
M14162	7A	150861541	0.004750238	0.020618557	99	0.159172587	0.236640264	0.101081796	6.645444148
M9095	4A	640249155	0.004779016	0.350515464	99	0.159172587	0.236529238	0.101081796	-6.148614741
M3765	2B	91631796	0.004779016	0.350515464	99	0.159172587	0.236529238	0.101081796	6.148614741
M9109	4A	142667251	0.004779016	0.350515464	99	0.159172587	0.236529238	0.101081796	6.148614741
M15138	7A	736378833	0.004820648	0.329896907	99	0.159172587	0.236369843	0.101081796	3.73989989
M8109	3B	42103334	0.004931659	0.041237113	99	0.159172587	0.235951707	0.101081796	-4.184484369
M10277	5A	551446643	0.004960249	0.144329897	99	0.159172587	0.235845605	0.101081796	2.901734265
M5663	2D	725913205	0.005050656	0.494845361	99	0.159172587	0.23551422	0.101081796	2.441386702
M4110	2B	384320443	0.005114044	0.082474227	99	0.159172587	0.235285528	0.101081796	3.739205285
M10967	5B	393940604	0.005114572	0.463917526	99	0.159172587	0.235283632	0.101081796	-2.039731426
M5847	2D	609493943	0.005124193	0.020618557	99	0.159172587	0.235249185	0.101081796	6.438910344
M15153	7A	739414265	0.005160282	0.412371134	99	0.159172587	0.23512056	0.101081796	-4.067135377
M12935	6A	0	0.005306981	0.051546392	99	0.159172587	0.234607158	0.101081796	-3.556211871
M5887	2D	606913605	0.005324495	0.350515464	99	0.159172587	0.234546855	0.101081796	6.439836327
M14533	7A	68211926	0.005367743	0.381443299	99	0.159172587	0.234398818	0.101081796	-3.431346873
M14383	7A	0	0.005444941	0.340206186	99	0.159172587	0.23413763	0.101081796	-7.9820084
M14415	7A	33761756	0.005444941	0.340206186	99	0.159172587	0.23413763	0.101081796	-7.9820084
M14327	7A	0	0.005444941	0.340206186	99	0.159172587	0.23413763	0.101081796	7.9820084
M5495	2D	77122284	0.005485041	0.453608247	99	0.159172587	0.234003473	0.101081796	-2.413912667
M5909	2D	615707186	0.005632087	0.391752577	99	0.159172587	0.233520102	0.101081796	-4.705253384
M216	1A	288094235	0.005664088	0.030927835	99	0.159172587	0.233416648	0.101081796	4.732902999
M6232	3A	305876520	0.005736813	0.319587629	99	0.159172587	0.233183783	0.101081796	-4.409478797
M12904	6A	615775115	0.005743526	0.340206186	99	0.159172587	0.233162441	0.101081796	-8.16252079
M12933	6A	0	0.005743526	0.340206186	99	0.159172587	0.233162441	0.101081796	-8.16252079
M5289	2B	796598273	0.005743526	0.340206186	99	0.159172587	0.233162441	0.101081796	-8.16252079
M7388	3B	714302155	0.005743526	0.340206186	99	0.159172587	0.233162441	0.101081796	-8.16252079
M9107	4A	691270312	0.005743526	0.340206186	99	0.159172587	0.233162441	0.101081796	-8.16252079
M12163	6A	5815028	0.005743526	0.340206186	99	0.159172587	0.233162441	0.101081796	8.16252079
M12285	6A	14388578	0.005743526	0.340206186	99	0.159172587	0.233162441	0.101081796	8.16252079
M12609	6A	558983569	0.005743526	0.340206186	99	0.159172587	0.233162441	0.101081796	8.16252079
M12901	6A	613605354	0.005743526	0.340206186	99	0.159172587	0.233162441	0.101081796	8.16252079
M1299	1B	386267990	0.005743526	0.340206186	99	0.159172587	0.233162441	0.101081796	8.16252079
M3759	2B	434731139	0.005743526	0.340206186	99	0.159172587	0.233162441	0.101081796	8.16252079
M7474	3B	389310464	0.005743526	0.340206186	99	0.159172587	0.233162441	0.101081796	8.16252079
M3764	2B	91596926	0.00575771	0.329896907	99	0.159172587	0.233117436	0.101081796	-5.639853363
M14293	7A	0	0.005782457	0.113402062	99	0.159172587	0.233039192	0.101081796	-2.983874849
M5930	2D	619962487	0.005936073	0.463917526	99	0.159172587	0.232561151	0.10245361	2.505008321
M10968	5B	393940604	0.005982771	0.340206186	99	0.159172587	0.232418377	0.102610171	1.930759652
M6417	3A	512556910	0.006022617	0.309278351	99	0.159172587	0.232297466	0.102647987	-5.615171038
M6788	3A	519467461	0.006085089	0.432989691	99	0.159172587	0.232109566	0.103068558	-3.128845623
M9162	4A	708083352	0.006201163	0.113402062	99	0.159172587	0.231765712	0.103760788	-3.238166472
M801	1B	37951885	0.006202057	0.329896907	99	0.159172587	0.23176309	0.103760788	4.312356638
M6427	3A	517095336	0.006363547	0.103092784	99	0.159172587	0.231295747	0.104631438	-3.407298206
M14410	7A	31106605	0.006480538	0.371134021	99	0.159172587	0.230964829	0.104631438	4.067781028
M7465	3B	206291923	0.006498681	0.195876289	99	0.159172587	0.230914066	0.104631438	-2.073898341
M1769	1B	64478551	0.006504386	0.12371134	99	0.159172587	0.230898136	0.104631438	2.408517149
M4034	2B	670175889	0.006568494	0.030927835	99	0.159172587	0.230720107	0.104631438	-4.933471914
M12586	6A	553054910	0.006752755	0.010309278	99	0.159172587	0.230218312	0.104631438	-7.934679051
M14760	7A	585063469	0.006752755	0.010309278	99	0.159172587	0.230218312	0.104631438	-7.934679051
M3985	2B	182512821	0.006752755	0.010309278	99	0.159172587	0.230218312	0.104631438	-7.934679051
M12610	6A	558983569	0.006752755	0.010309278	99	0.159172587	0.230218312	0.104631438	7.934679051
M12691	6A	449776081	0.006752755	0.010309278	99	0.159172587	0.230218312	0.104631438	7.934679051
M9120	4A	25288905	0.006752755	0.010309278	99	0.159172587	0.230218312	0.104631438	7.934679051
M4100	2B	419320938	0.006752891	0.474226804	99	0.159172587	0.230217948	0.104631438	2.786771168
M1744	1B	193426988	0.006828635	0.309278351	99	0.159172587	0.230015802	0.10520727	-1.864772657
M1637	1B	601383349	0.006933869	0.484536082	99	0.159172587	0.229738794	0.105405188	2.131335505
M13333	6B	218963791	0.006942704	0.432989691	99	0.159172587	0.229715737	0.105405188	-2.719001878
M4007	2B	184494452	0.006957438	0.381443299	99	0.159172587	0.229677353	0.105405188	-4.581091053
M136	1A	20866783	0.007043947	0.443298969	99	0.159172587	0.229453683	0.10612621	2.132404325
M4106	2B	510796274	0.007120092	0.041237113	99	0.159172587	0.229259164	0.106684021	-4.717964794
M6193	3A	220131274	0.007191268	0.051546392	99	0.159172587	0.229079288	0.107161686	2.960298965
M10929	5B	529717799	0.007256322	0.422680412	99	0.159172587	0.2289165	0.107543422	2.39104217
M10962	5B	552556292	0.007349159	0.371134021	99	0.159172587	0.228686802	0.108067168	2.172796751
M14571	7A	83070191	0.007424198	0.329896907	99	0.159172587	0.228503339	0.108067168	-2.100050636
M9071	4A	689130935	0.007503245	0.030927835	99	0.159172587	0.228312155	0.108067168	-4.188531426
M9145	4A	364049164	0.007567283	0.443298969	99	0.159172587	0.228158804	0.108067168	-2.78522359
M12126	6A	5129543	0.00758938	0.494845361	99	0.159172587	0.228106204	0.108067168	1.912652847
M12589	6A	405655386	0.007593756	0.24742268	99	0.159172587	0.228095805	0.108067168	-2.398042545
M12765	6A	596176929	0.007644058	0.195876289	99	0.159172587	0.227976726	0.108067168	2.486452435
M9137	4A	23511186	0.00764505	0.443298969	99	0.159172587	0.227974385	0.108067168	3.586272275
M5835	2D	587202661	0.007678526	0.432989691	99	0.159172587	0.227895602	0.108067168	-2.501057886
M9073	4A	641838580	0.00769319	0.113402062	99	0.159172587	0.227861204	0.108067168	3.194037864
M486	1A	339729738	0.007727575	0.371134021	99	0.159172587	0.22778081	0.108067168	-4.74376898
M3993	2B	543306948	0.007785457	0.391752577	99	0.159172587	0.22764632	0.108321131	-4.095557346
M6439	3A	456437080	0.007951366	0.494845361	99	0.159172587	0.227266529	0.109360455	1.613368766
M6892	3B	7791132	0.007980466	0.18556701	99	0.159172587	0.227200767	0.109360455	1.901253053
M3636	2B	504867107	0.008109021	0.412371134	99	0.159172587	0.22691321	0.109518428	2.42693404
M9208	4A	23628409	0.008109614	0.329896907	99	0.159172587	0.226911895	0.109518428	-1.853683782
M1628	1B	144111278	0.008205851	0.494845361	99	0.159172587	0.226699741	0.109518428	-2.551852416
M10256	5A	429304969	0.008213629	0.030927835	99	0.159172587	0.226682707	0.109518428	5.23675349
M11751	5B	679651559	0.008225337	0.134020619	99	0.159172587	0.226657099	0.109518428	2.21734066
M10944	5B	576920050	0.008338864	0.412371134	99	0.159172587	0.226410745	0.109855472	2.386574498
M3876	2B	730608229	0.008443253	0.350515464	99	0.159172587	0.22618729	0.110166268	2.565840695
M1613	1B	594764202	0.008592036	0.484536082	99	0.159172587	0.225873735	0.111066972	2.592314936
M12624	6A	552763700	0.008593741	0.329896907	99	0.159172587	0.225870175	0.111066972	-2.83732287
M1056	1B	3440095	0.008654464	0.030927835	99	0.159172587	0.225743855	0.111324164	-5.014607714
M9133	4A	236257089	0.008765414	0.443298969	99	0.159172587	0.225515418	0.111893612	-3.484727753
M10393	5A	579325248	0.008780797	0.371134021	99	0.159172587	0.225483984	0.111893612	4.710204892
M10707	5B	119188411	0.008831797	0.030927835	99	0.159172587	0.225380179	0.112020049	4.16804869
M4201	2B	562512178	0.009160696	0.412371134	99	0.159172587	0.224725413	0.115120821	3.85842267
M1071	1B	21849576	0.009257412	0.350515464	99	0.159172587	0.224537535	0.115586222	2.846218701
M9242	4A	10725909	0.009287988	0.494845361	99	0.159172587	0.224478565	0.115586222	2.221893429
M8113	3B	720851922	0.00935606	0.443298969	99	0.159172587	0.224348003	0.115586222	-2.587499321
M3835	2B	105896043	0.009380702	0.06185567	99	0.159172587	0.224300985	0.115586222	3.643716316
M14862	7A	679816918	0.0094274	0.134020619	99	0.159172587	0.224212235	0.115586222	2.706501939
M3706	2B	73269997	0.009452045	0.371134021	99	0.159172587	0.224165581	0.115586222	3.457912727
M3792	2B	77236275	0.009679093	0.092783505	99	0.159172587	0.223741657	0.11783432	-2.655260061
M12537	6A	456012417	0.009908505	0.402061856	99	0.159172587	0.223323741	0.11936489	2.932753148
M2081	1D	52362168	0.009976268	0.195876289	99	0.159172587	0.223202231	0.11936489	3.137001781
M11162	5B	492257250	0.010041015	0.402061856	99	0.159172587	0.223086931	0.11936489	-2.878896815
M15154	7A	739414265	0.01020949	0.350515464	99	0.159172587	0.222790518	0.11936489	5.595416529
M2908	2A	21223660	0.010274555	0.175257732	99	0.159172587	0.222677411	0.11936489	2.091063239
M11697	5B	626337103	0.010347874	0.020618557	99	0.159172587	0.222550847	0.11936489	6.008016299
M9958	5A	74419583	0.010360286	0.164948454	99	0.159172587	0.222529514	0.11936489	2.12830144
M14342	7A	0	0.010395588	0.371134021	99	0.159172587	0.222468985	0.11936489	-5.1657613
M10240	5A	534107889	0.010395588	0.371134021	99	0.159172587	0.222468985	0.11936489	5.1657613
M14939	7A	83447347	0.010395588	0.371134021	99	0.159172587	0.222468985	0.11936489	5.1657613
M4218	2B	34735773	0.010412827	0.164948454	99	0.159172587	0.222439504	0.11936489	-2.867277015
M10884	5B	520209151	0.010417618	0.309278351	99	0.159172587	0.222431321	0.11936489	-2.161742372
M3746	2B	71304332	0.010482867	0.051546392	99	0.159172587	0.222320254	0.119411533	3.971000165
M12306	6A	0	0.010513752	0.12371134	99	0.159172587	0.222267933	0.119411533	1.848703393
M11489	5B	550320578	0.010553054	0.463917526	99	0.159172587	0.222201584	0.119411533	2.149559281
M1687	1B	453210400	0.010637005	0.298969072	99	0.159172587	0.222060723	0.119864103	-1.771699604
M3857	2B	127151364	0.010762805	0.288659794	99	0.159172587	0.221851804	0.120452341	-2.446026676
M4143	2B	380453000	0.010821717	0.412371134	99	0.159172587	0.221754843	0.120452341	-2.201052481
M4153	2B	183207936	0.010874203	0.402061856	99	0.159172587	0.221668924	0.12054452	-2.381609637
M15381	7B	470836213	0.010963077	0.164948454	99	0.159172587	0.22152442	0.121037696	-2.547150933
M11378	5B	99660656	0.011141835	0.020618557	99	0.159172587	0.221237443	0.122515261	-6.190188563
M5741	2D	598804526	0.01146979	0.195876289	99	0.159172587	0.220723257	0.124557983	-2.766261931
M9861	5A	14849690	0.01147577	0.391752577	99	0.159172587	0.220714024	0.124557983	3.072606163
M1548	1B	0	0.011534751	0.06185567	99	0.159172587	0.220623234	0.124557983	-2.680519978
M7754	3B	420365956	0.011555985	0.484536082	99	0.159172587	0.220590667	0.124557983	-2.121927832
M10744	5B	360428929	0.011650801	0.092783505	99	0.159172587	0.220446004	0.124785691	2.528965113
M5729	2D	716052552	0.011668629	0.422680412	99	0.159172587	0.220418942	0.124785691	1.764230559
M7877	3B	586524432	0.011715333	0.350515464	99	0.159172587	0.22034825	0.124795759	-5.860753787
M10331	5A	564814281	0.011804684	0.381443299	99	0.159172587	0.220213826	0.125258264	1.638077549
M11231	5B	511853816	0.012012479	0.453608247	99	0.159172587	0.219905282	0.126034035	2.342161619
M14413	7A	33732604	0.012013468	0.463917526	99	0.159172587	0.219903826	0.126034035	2.606942173
M7401	3B	592199044	0.012016446	0.350515464	99	0.159172587	0.219899446	0.126034035	-5.379631096
M12413	6A	48048270	0.012102693	0.072164948	99	0.159172587	0.219773063	0.126452275	2.674684138
M13493	6B	205902023	0.012188768	0.474226804	99	0.159172587	0.219647869	0.126865533	2.233953314
M3727	2B	50690865	0.012263539	0.360824742	99	0.159172587	0.219539865	0.126891961	2.230595582
M9297	4A	718920407	0.01228437	0.268041237	99	0.159172587	0.219509898	0.126891961	2.17730156
M11752	5B	679651559	0.012425276	0.391752577	99	0.159172587	0.219308582	0.127863122	-2.800253169
M4262	2B	553279131	0.012658301	0.226804124	99	0.159172587	0.218980841	0.129712982	-1.725951133
M9755	4D	220375714	0.012700609	0.402061856	99	0.159172587	0.218922015	0.129712982	-3.639210255
M8337	3D	48663994	0.012772593	0.463917526	99	0.159172587	0.218822396	0.129712982	1.670521556
M892	1B	12505139	0.012836576	0.319587629	99	0.159172587	0.218734342	0.129712982	-4.173740685
M5250	2B	765677047	0.012842869	0.360824742	99	0.159172587	0.218725706	0.129712982	3.178368719
M12629	6A	570488216	0.012908286	0.237113402	99	0.159172587	0.2186362	0.129892604	1.920385929
M8158	3B	75766790	0.012956608	0.195876289	99	0.159172587	0.218570387	0.129899526	2.150436877
M11693	5B	0	0.013074843	0.432989691	99	0.159172587	0.218410436	0.13060475	-3.005706184
M9309	4A	719934001	0.01321146	0.350515464	99	0.159172587	0.218227492	0.130776487	-2.044894788
M6015	2D	247051054	0.013234496	0.453608247	99	0.159172587	0.21819684	0.130776487	-2.265219154
M258	1A	386477411	0.013275089	0.195876289	99	0.159172587	0.218142963	0.130776487	2.253468104
M4078	2B	296004626	0.013330341	0.041237113	99	0.159172587	0.218069906	0.130776487	4.475024801
M5850	2D	580188957	0.013462691	0.432989691	99	0.159172587	0.217896187	0.130776487	-2.252155691
M310	1A	362317345	0.013568326	0.195876289	99	0.159172587	0.217758813	0.130776487	2.301974238
M9055	4A	687327397	0.013583365	0.391752577	99	0.159172587	0.217739347	0.130776487	-5.019441803
M13203	6B	65496487	0.013701261	0.371134021	99	0.159172587	0.217587523	0.130776487	-4.083551545
M9100	4A	220162554	0.013749515	0.432989691	99	0.159172587	0.217525776	0.130776487	-2.601703571
M6542	3A	501061731	0.013836243	0.175257732	99	0.159172587	0.217415367	0.130776487	1.710372766
M9787	4D	465587647	0.013894107	0.340206186	99	0.159172587	0.217342105	0.130776487	-2.159770771
M13070	6B	17658870	0.013895232	0.154639175	99	0.159172587	0.217340684	0.130776487	-2.294040196
M4365	2B	135437600	0.013904405	0.072164948	99	0.159172587	0.217329101	0.130776487	3.267785513
M4212	2B	202596151	0.013910733	0.371134021	99	0.159172587	0.217321116	0.130776487	-4.128156299
M4157	2B	508332601	0.013910733	0.371134021	99	0.159172587	0.217321116	0.130776487	4.128156299
M6079	3A	0	0.014036963	0.412371134	99	0.159172587	0.217162599	0.130776487	2.982963484
M5637	2D	0	0.01406619	0.463917526	99	0.159172587	0.21712611	0.130776487	2.38270391
M3722	2B	49874133	0.01410137	0.072164948	99	0.159172587	0.217082292	0.130776487	-3.284889572
M12342	6A	558043959	0.01413076	0.278350515	99	0.159172587	0.217045775	0.130776487	2.367164877
M4957	2B	761846794	0.014182441	0.216494845	99	0.159172587	0.216981755	0.130776487	2.306102868
M2706	2A	417084357	0.014233732	0.463917526	99	0.159172587	0.216918459	0.130776487	3.487286875
M5625	2D	568465158	0.01426737	0.134020619	99	0.159172587	0.216877077	0.130776487	2.361710503
M1671	1B	628033554	0.014324282	0.350515464	99	0.159172587	0.216807295	0.130776487	-5.476687835
M9112	4A	701045215	0.014465796	0.092783505	99	0.159172587	0.216635034	0.130776487	-3.673694782
M4616	2B	91473909	0.014579568	0.216494845	99	0.159172587	0.216497821	0.130776487	1.89680755
M14114	6D	0	0.014652838	0.134020619	99	0.159172587	0.216410046	0.130776487	-2.433651015
M1009	1B	39514123	0.014685952	0.020618557	99	0.159172587	0.216370528	0.130776487	5.492997175
M1224	1B	0	0.014685952	0.020618557	99	0.159172587	0.216370528	0.130776487	5.492997175
M1249	1B	452770206	0.01470708	0.422680412	99	0.159172587	0.216345363	0.130776487	2.354625993
M11147	5B	529048297	0.014716088	0.257731959	99	0.159172587	0.216334645	0.130776487	-1.923824011
M4107	2B	277093048	0.014919012	0.381443299	99	0.159172587	0.216095015	0.130776487	3.958659172
M3986	2B	182512821	0.014948628	0.402061856	99	0.159172587	0.216060328	0.130776487	3.160295201
M4112	2B	477570133	0.014987598	0.206185567	99	0.159172587	0.216014795	0.130776487	1.869934125
M1672	1B	628033554	0.015029184	0.18556701	99	0.159172587	0.215966342	0.130776487	2.334884448
M13437	6B	617644199	0.015035312	0.329896907	99	0.159172587	0.215959214	0.130776487	-1.86619552
M8227	3B	28789197	0.015038632	0.134020619	99	0.159172587	0.215955354	0.130776487	2.767017401
M12485	6A	317623793	0.015070374	0.329896907	99	0.159172587	0.21591849	0.130776487	2.259162807
M11076	5B	592867962	0.01507366	0.371134021	99	0.159172587	0.215914678	0.130776487	2.381247087
M9062	4A	4271248	0.015197211	0.453608247	99	0.159172587	0.215771993	0.130776487	-3.104213464
M1616	1B	628627682	0.015205994	0.06185567	99	0.159172587	0.215761896	0.130776487	-3.173179092
M6392	3A	363608529	0.015216396	0.463917526	99	0.159172587	0.215749946	0.130776487	-1.967823362
M6175	3A	20238715	0.015225067	0.453608247	99	0.159172587	0.215739991	0.130776487	2.149914256
M5883	2D	605883075	0.015305169	0.381443299	99	0.159172587	0.21564831	0.130776487	2.975434484
M11113	5B	531194944	0.015330044	0.381443299	99	0.159172587	0.21561994	0.130776487	3.415325625
M11671	5B	617684309	0.015345976	0.309278351	99	0.159172587	0.215601797	0.130776487	3.147920732
M4001	2B	213709998	0.015398536	0.195876289	99	0.159172587	0.215542079	0.130815596	2.132880153
M12251	6A	16598099	0.015501636	0.484536082	99	0.159172587	0.215425556	0.131282492	2.572928148
M11708	5B	520948335	0.015567345	0.030927835	99	0.159172587	0.215351716	0.131327164	4.613229048
M5714	2D	610403424	0.015603227	0.195876289	99	0.159172587	0.215311532	0.131327164	-2.122830336
M9417	4A	740144144	0.015697469	0.18556701	99	0.159172587	0.215206452	0.131349799	-2.638737524
M7865	3B	736466529	0.015956783	0.092783505	99	0.159172587	0.2149207	0.131349799	-2.801928043
M2286	1D	0	0.016017663	0.474226804	99	0.159172587	0.21485432	0.131349799	2.21974627
M5230	2B	645000730	0.016038274	0.340206186	99	0.159172587	0.214831907	0.131349799	-2.431243794
M10889	5B	367689148	0.016062658	0.226804124	99	0.159172587	0.21480543	0.131349799	2.139503658
M6775	3A	0	0.016073721	0.381443299	99	0.159172587	0.214793431	0.131349799	-2.214406062
M6342	3A	108025232	0.016094812	0.494845361	99	0.159172587	0.21477058	0.131349799	1.912095094
M1250	1B	452770206	0.016179876	0.432989691	99	0.159172587	0.214678738	0.131349799	-1.950836418
M14778	7A	597566121	0.016204177	0.051546392	99	0.159172587	0.214652593	0.131349799	-3.437080794
M7415	3B	275636381	0.016204177	0.051546392	99	0.159172587	0.214652593	0.131349799	-3.437080794
M7898	3B	745290131	0.016204177	0.051546392	99	0.159172587	0.214652593	0.131349799	-3.437080794
M4459	2B	649949245	0.016258896	0.412371134	99	0.159172587	0.214593873	0.131349799	-2.679060366
M9138	4A	23511186	0.016285747	0.092783505	99	0.159172587	0.214565135	0.131349799	3.020666225
M4010	2B	131147922	0.016521411	0.350515464	99	0.159172587	0.214315023	0.131349799	-1.83748095
M14391	7A	29138301	0.016705082	0.463917526	99	0.159172587	0.214122677	0.131349799	1.992820989
M1655	1B	589090638	0.016722085	0.288659794	99	0.159172587	0.214104983	0.131349799	1.963214
M14543	7A	69893167	0.016773303	0.144329897	99	0.159172587	0.2140518	0.131349799	2.045018595
M4435	2B	620850327	0.016798696	0.24742268	99	0.159172587	0.214025495	0.131349799	-1.824960977
M15176	7B	15592633	0.016946276	0.06185567	99	0.159172587	0.21387344	0.131349799	3.179830479
M13191	6B	77434370	0.016955161	0.103092784	99	0.159172587	0.21386433	0.131349799	-2.488189384
M10973	5B	435043643	0.017031153	0.268041237	99	0.159172587	0.213786618	0.131349799	2.035104556
M13959	6D	51427536	0.017072988	0.051546392	99	0.159172587	0.213743992	0.131349799	-2.77310505
M12641	6A	558040487	0.017146148	0.195876289	99	0.159172587	0.213669712	0.131349799	1.774140147
M11754	5B	678708672	0.017204739	0.402061856	99	0.159172587	0.213610463	0.131349799	2.131497563
M5642	2D	587305772	0.017238242	0.226804124	99	0.159172587	0.213576679	0.131349799	-2.040893598
M10596	5B	20167023	0.017240218	0.371134021	99	0.159172587	0.213574689	0.131349799	-2.051822407
M4766	2B	599789141	0.0172712	0.030927835	99	0.159172587	0.213543513	0.131349799	3.762858461
M6531	3A	640751875	0.017302273	0.175257732	99	0.159172587	0.213512303	0.131349799	2.278651633
M11411	5B	368680383	0.017364619	0.216494845	99	0.159172587	0.213449862	0.131349799	1.547300432
M9741	4D	16813358	0.017375616	0.257731959	99	0.159172587	0.213438872	0.131349799	1.60197586
M382	1A	504702998	0.017385122	0.06185567	99	0.159172587	0.213429379	0.131349799	-2.513865732
M4193	2B	674740371	0.017398964	0.474226804	99	0.159172587	0.213415565	0.131349799	2.187371301
M5541	2D	530255014	0.017411255	0.381443299	99	0.159172587	0.213403308	0.131349799	2.006102357
M6209	3A	577683980	0.01743624	0.381443299	99	0.159172587	0.213378421	0.131349799	-3.381345504
M7416	3B	275636381	0.01743624	0.381443299	99	0.159172587	0.213378421	0.131349799	-3.381345504
M7881	3B	740106785	0.01743624	0.381443299	99	0.159172587	0.213378421	0.131349799	-3.381345504
M6158	3A	575259106	0.01743624	0.381443299	99	0.159172587	0.213378421	0.131349799	3.381345504
M7926	3B	552736382	0.017502235	0.072164948	99	0.159172587	0.213312866	0.131405923	2.964621414
M13995	6D	156753575	0.017540064	0.257731959	99	0.159172587	0.213275404	0.131405923	-2.703366929
M10871	5B	431360770	0.017614099	0.298969072	99	0.159172587	0.213202336	0.131599038	1.585504
M3146	2A	755740514	0.017738798	0.391752577	99	0.159172587	0.213079993	0.131698218	-3.528104473
M12861	6A	611545509	0.017772195	0.360824742	99	0.159172587	0.213047381	0.131698218	-4.041200935
M1619	1B	603262258	0.017772257	0.494845361	99	0.159172587	0.21304732	0.131698218	2.285808176
M579	1A	565296725	0.017914353	0.422680412	99	0.159172587	0.212909279	0.132391441	-1.938100374
M3115	2A	747610057	0.018045252	0.422680412	99	0.159172587	0.212783131	0.132639897	-2.393519001
M5849	2D	580188957	0.018221297	0.216494845	99	0.159172587	0.212614985	0.133314168	-2.260115259
M4246	2B	165245434	0.018234758	0.443298969	99	0.159172587	0.212602199	0.133314168	2.43198952
M9992	5A	46505672	0.01832564	0.474226804	99	0.159172587	0.212516128	0.133620376	2.4670508
M90	1A	14520409	0.018468276	0.381443299	99	0.159172587	0.212381947	0.133901147	-2.1910916
M8266	3D	14857937	0.018482176	0.072164948	99	0.159172587	0.21236893	0.133901147	-2.335952153
M1625	1B	614701448	0.01853313	0.391752577	99	0.159172587	0.212321297	0.133901147	3.923181805
M582	1A	0	0.018580786	0.381443299	99	0.159172587	0.212276873	0.133901147	1.991673414
M13348	6B	444919180	0.018609657	0.164948454	99	0.159172587	0.212250018	0.133901147	2.489426297
M13571	6B	561062316	0.018766381	0.371134021	99	0.159172587	0.212104998	0.134421577	-2.010082252
M9750	4D	95663405	0.018780572	0.092783505	99	0.159172587	0.21209193	0.134421577	2.421736173
M363	1A	497201516	0.018847133	0.319587629	99	0.159172587	0.212030774	0.134544846	-2.93805263
M4456	2B	615886571	0.019030825	0.319587629	99	0.159172587	0.211863171	0.135501464	1.634993221
M12891	6A	614663924	0.019103826	0.18556701	99	0.159172587	0.211797036	0.135600653	-2.37772941
M3879	2B	135693367	0.019146568	0.350515464	99	0.159172587	0.211758438	0.135600653	-2.24263071
M8145	3B	810657303	0.019198695	0.463917526	99	0.159172587	0.211711487	0.135600653	-1.846325949
M14130	7A	2682255	0.01938053	0.082474227	99	0.159172587	0.211548752	0.135600653	2.492873385
M4156	2B	107028709	0.019406709	0.257731959	99	0.159172587	0.211525455	0.135600653	-1.900356019
M4134	2B	412778129	0.0194077	0.226804124	99	0.159172587	0.211524573	0.135600653	1.585726723
M5834	2D	594543436	0.019450848	0.402061856	99	0.159172587	0.211486251	0.135600653	-2.029665781
M4697	2B	594098170	0.019473806	0.443298969	99	0.159172587	0.211465896	0.135600653	2.404458894
M10892	5B	370732351	0.019550345	0.381443299	99	0.159172587	0.211398219	0.135600653	1.906890514
M9883	5A	199146737	0.019564574	0.298969072	99	0.159172587	0.211385669	0.135600653	2.054802624
M14033	6D	495573667	0.019591734	0.216494845	99	0.159172587	0.211361739	0.135600653	2.299874076
M13576	6B	667201097	0.019766733	0.360824742	99	0.159172587	0.211208386	0.136152042	-2.024506317
M8119	3B	705837468	0.019837675	0.030927835	99	0.159172587	0.211146626	0.136152042	3.734860506
M14456	7A	38951100	0.019877037	0.402061856	99	0.159172587	0.211112459	0.136152042	-1.991058016
M10118	5A	742010724	0.019921036	0.113402062	99	0.159172587	0.211074351	0.136152042	-3.443496929
M10038	5A	445275979	0.019921036	0.113402062	99	0.159172587	0.211074351	0.136152042	3.443496929
M12976	6B	2439812	0.020062857	0.340206186	99	0.159172587	0.210952119	0.13676516	1.541123607
M8019	3B	765843802	0.020272103	0.113402062	99	0.159172587	0.210773429	0.13676516	2.32649258
M834	1B	21523277	0.020340951	0.237113402	99	0.159172587	0.210715059	0.13676516	-1.726139344
M4551	2B	565077064	0.020477194	0.268041237	99	0.159172587	0.210600163	0.13676516	2.555952403
M5785	2D	598277265	0.020481423	0.360824742	99	0.159172587	0.21059661	0.13676516	-1.803623033
M7281	3B	48788274	0.020520064	0.340206186	99	0.159172587	0.210564176	0.13676516	2.003672546
M4568	2B	545270114	0.020536217	0.226804124	99	0.159172587	0.210550638	0.13676516	1.750991331
M4450	2B	616934904	0.020609786	0.082474227	99	0.159172587	0.210489117	0.13676516	-3.260471985
M114	1A	12427365	0.020666837	0.092783505	99	0.159172587	0.210441568	0.13676516	2.976717484
M14019	6D	9514548	0.020668431	0.443298969	99	0.159172587	0.210440242	0.13676516	-2.350078555
M14602	7A	102061623	0.020709459	0.144329897	99	0.159172587	0.210406135	0.13676516	-2.076599235
M3741	2B	48838344	0.020811283	0.360824742	99	0.159172587	0.210321796	0.13676516	-2.771997651
M1525	1B	588259435	0.020816747	0.371134021	99	0.159172587	0.210317282	0.13676516	-2.936077204
M13345	6B	486549528	0.020897019	0.278350515	99	0.159172587	0.210251119	0.13676516	1.837380709
M5557	2D	632239916	0.020941933	0.206185567	99	0.159172587	0.210214216	0.13676516	1.894709952
M4172	2B	223152424	0.020975829	0.072164948	99	0.159172587	0.210186421	0.13676516	2.956956148
M866	1B	496978998	0.020977674	0.360824742	99	0.159172587	0.21018491	0.13676516	1.371335053
M1668	1B	615019866	0.021009085	0.463917526	99	0.159172587	0.210159197	0.13676516	2.046571617
M3789	2B	16256106	0.021041965	0.412371134	99	0.159172587	0.210132325	0.13676516	-2.828033131
M3657	2B	58723204	0.021082942	0.443298969	99	0.159172587	0.210098897	0.13676516	2.327514642
M14544	7A	69893167	0.021141323	0.463917526	99	0.159172587	0.210051391	0.13676516	1.969190154
M3221	2A	0	0.021211815	0.463917526	99	0.159172587	0.209994213	0.13676516	2.686085737
M7903	3B	564807126	0.021250417	0.103092784	99	0.159172587	0.209962987	0.13676516	3.254954821
M5836	2D	587202661	0.021256569	0.422680412	99	0.159172587	0.209958016	0.13676516	-1.721673807
M9150	4A	22270015	0.02130393	0.381443299	99	0.159172587	0.209919797	0.13676516	3.997203884
M14728	7A	495536855	0.021314702	0.340206186	99	0.159172587	0.209911117	0.13676516	-1.968228597
M5931	2D	619962487	0.021456779	0.18556701	99	0.159172587	0.209797063	0.137198643	2.410270802
M4154	2B	183207936	0.021564366	0.216494845	99	0.159172587	0.209711225	0.137198643	-1.731611546
M7883	3B	749763064	0.021754432	0.340206186	99	0.159172587	0.20956068	0.137198643	2.126465824
M13721	6B	462318879	0.021782157	0.484536082	99	0.159172587	0.209538835	0.137198643	1.698613986
M3927	2B	180555363	0.021872824	0.319587629	99	0.159172587	0.209467605	0.137198643	-2.139383371
M10863	5B	422121027	0.021886131	0.309278351	99	0.159172587	0.209457176	0.137198643	-2.100552279
M9456	4B	0	0.021946995	0.092783505	99	0.159172587	0.209409565	0.137198643	-2.307424971
M1232	1B	86102631	0.021955056	0.257731959	99	0.159172587	0.209403269	0.137198643	2.367936187
M3942	2B	32805672	0.021958875	0.113402062	99	0.159172587	0.209400288	0.137198643	1.957257629
M6755	3A	720367772	0.021983763	0.381443299	99	0.159172587	0.209380869	0.137198643	-2.216327943
M6313	3A	69503671	0.022047398	0.030927835	99	0.159172587	0.209331327	0.137198643	3.647642649
M270	1A	479742741	0.022084047	0.164948454	99	0.159172587	0.209302862	0.137198643	-1.851795635
M9631	4B	654440058	0.022130798	0.402061856	99	0.159172587	0.209266623	0.137198643	-2.430596411
M14804	7A	634800683	0.022136928	0.06185567	99	0.159172587	0.209261878	0.137198643	2.977602708
M2932	2A	690962390	0.022197859	0.072164948	99	0.159172587	0.209214782	0.137207114	2.589460821
M9939	5A	2861753	0.022298057	0.206185567	99	0.159172587	0.209137633	0.137207114	-2.018795206
M15020	7A	712493182	0.022542311	0.206185567	99	0.159172587	0.208951087	0.138141309	1.852899789
M9428	4A	733792535	0.022593369	0.329896907	99	0.159172587	0.208912362	0.138143759	1.943421601
M14546	7A	66283565	0.022748922	0.494845361	99	0.159172587	0.208794949	0.138225118	2.310101255
M10228	5A	420625497	0.022753417	0.309278351	99	0.159172587	0.208791568	0.138225118	-1.67961264
M6343	3A	142889812	0.02276571	0.18556701	99	0.159172587	0.208782328	0.138225118	-1.973053018
M3067	2A	642784267	0.022811964	0.494845361	99	0.159172587	0.208747605	0.138225118	-1.75936908
M8234	3B	823095734	0.022860113	0.360824742	99	0.159172587	0.208711539	0.138225118	1.996027886
M1954	1B	260327837	0.022916657	0.195876289	99	0.159172587	0.208669286	0.13826045	1.542922154
M10806	5B	389819412	0.0230922	0.103092784	99	0.159172587	0.208538811	0.139011983	-2.20617412
M10607	5B	369428012	0.023153736	0.432989691	99	0.159172587	0.20849332	0.139075416	-2.543710709
M8237	3B	825858454	0.02322515	0.329896907	99	0.159172587	0.208440688	0.139197768	-1.953160236
M14330	7A	16886742	0.02328204	0.360824742	99	0.159172587	0.208398882	0.139232724	-3.355816621
M7173	3B	41138847	0.02338441	0.432989691	99	0.159172587	0.208323925	0.13950154	1.575128771
M10643	5B	72083499	0.023429302	0.226804124	99	0.159172587	0.208291165	0.13950154	-1.764390672
M9757	4D	336833285	0.02357978	0.484536082	99	0.159172587	0.208181831	0.139816652	-2.003427717
M6031	3A	9486770	0.023598105	0.360824742	99	0.159172587	0.208168567	0.139816652	2.718322296
M13287	6B	230607608	0.023637368	0.432989691	99	0.159172587	0.208140184	0.139816652	-1.864785831
M14771	7A	589124958	0.02368731	0.051546392	99	0.159172587	0.208104153	0.139816652	3.266226944
M1962	1D	585308022	0.023859413	0.371134021	99	0.159172587	0.2079806	0.140528337	1.752081577
M1045	1B	94011977	0.023988294	0.329896907	99	0.159172587	0.207888691	0.140982928	-2.079976682
M10010	5A	461913319	0.024074944	0.226804124	99	0.159172587	0.207827192	0.141187897	1.4758909
M14601	7A	102061623	0.024393991	0.350515464	99	0.159172587	0.207602749	0.141347123	2.72113709
M2612	2A	0	0.024418221	0.360824742	99	0.159172587	0.207585831	0.141347123	-1.559676276
M13475	6B	576042248	0.024553921	0.412371134	99	0.159172587	0.207491406	0.141347123	2.083368416
M9778	4D	450148197	0.024636259	0.072164948	99	0.159172587	0.207434381	0.141347123	-2.432209442
M3693	2B	68579934	0.024650127	0.319587629	99	0.159172587	0.207424796	0.141347123	2.55009466
M10835	5B	458397299	0.02472	0.020618557	99	0.159172587	0.20737659	0.141347123	4.866387183
M291	1A	303728094	0.02472	0.020618557	99	0.159172587	0.20737659	0.141347123	4.866387183
M9151	4A	441240399	0.024748758	0.12371134	99	0.159172587	0.207356792	0.141347123	2.173539735
M15102	7A	720585870	0.024779752	0.041237113	99	0.159172587	0.207335482	0.141347123	3.456097903
M540	1A	701043681	0.024793448	0.24742268	99	0.159172587	0.207326074	0.141347123	-1.980728144
M1996	1D	8818793	0.02483987	0.371134021	99	0.159172587	0.207294227	0.141347123	2.030900742
M4031	2B	572862830	0.024876814	0.06185567	99	0.159172587	0.207268927	0.141347123	-3.232041384
M3080	2A	736066326	0.024881422	0.350515464	99	0.159172587	0.207265774	0.141347123	1.630831516
M4151	2B	95129435	0.024893965	0.103092784	99	0.159172587	0.207257195	0.141347123	2.718935972
M1746	1B	461485520	0.024954846	0.371134021	99	0.159172587	0.207215619	0.141347123	-1.759745653
M1782	1B	644598781	0.024997514	0.226804124	99	0.159172587	0.207186545	0.141347123	1.513836576
M11737	5B	672858608	0.025060469	0.154639175	99	0.159172587	0.207143744	0.141347123	-2.685682997
M2676	2A	489506911	0.02517828	0.422680412	99	0.159172587	0.20706395	0.141347123	-1.884283985
M5639	2D	593898542	0.025187142	0.134020619	99	0.159172587	0.207057964	0.141347123	-1.898276129
M5706	2D	591603469	0.025210452	0.371134021	99	0.159172587	0.207042229	0.141347123	2.420233428
M9810	4D	497938965	0.025218116	0.340206186	99	0.159172587	0.207037059	0.141347123	-1.403552167
M3707	2B	293132103	0.025393003	0.134020619	99	0.159172587	0.20691953	0.141347123	1.990612184
M8339	3D	37969599	0.025419108	0.422680412	99	0.159172587	0.20690206	0.141347123	1.57861665
M5249	2B	765677047	0.025488211	0.030927835	99	0.159172587	0.206855907	0.141347123	-3.938524969
M1669	1B	656111729	0.025528333	0.422680412	99	0.159172587	0.20682917	0.141347123	-1.674876837
M601	1A	566369413	0.025586907	0.329896907	99	0.159172587	0.206790218	0.141347123	-1.627874681
M39	1A	2236676	0.025697718	0.268041237	99	0.159172587	0.206716784	0.141347123	2.499215071
M12011	5D	552080511	0.025700409	0.484536082	99	0.159172587	0.206715005	0.141347123	-2.068035794
M13105	6B	42378167	0.025804754	0.288659794	99	0.159172587	0.206646169	0.141347123	-1.579668841
M5028	2B	758922449	0.025813657	0.422680412	99	0.159172587	0.20664031	0.141347123	2.464209037
M14630	7A	126783862	0.025841289	0.195876289	99	0.159172587	0.206622137	0.141347123	1.690088263
M8729	4A	532076077	0.025954182	0.391752577	99	0.159172587	0.206548105	0.141347123	1.572037975
M5900	2D	608266290	0.025963691	0.12371134	99	0.159172587	0.206541885	0.141347123	-2.451267208
M2168	1D	423928525	0.025967707	0.371134021	99	0.159172587	0.206539258	0.141347123	1.57796109
M6687	3A	420562185	0.025968063	0.381443299	99	0.159172587	0.206539025	0.141347123	2.086140243
M3841	2B	144569794	0.026162789	0.329896907	99	0.159172587	0.206412197	0.141719777	-1.838209755
M5365	2D	12550757	0.026239365	0.350515464	99	0.159172587	0.206362595	0.141719777	-2.647302524
M11253	5B	624609798	0.026243541	0.06185567	99	0.159172587	0.206359894	0.141719777	-3.033651062
M5197	2B	647814104	0.026291231	0.051546392	99	0.159172587	0.206329085	0.141719777	-3.324798562
M5950	2D	774840471	0.026296372	0.020618557	99	0.159172587	0.206325768	0.141719777	-4.580485987
M11704	5B	644347628	0.026391855	0.443298969	99	0.159172587	0.206264274	0.141895493	-2.274332242
M10484	5A	653716640	0.02645148	0.340206186	99	0.159172587	0.206225994	0.141895493	-3.089159672
M11166	5B	519005204	0.026485077	0.103092784	99	0.159172587	0.206204464	0.141895493	2.655670174
M9090	4A	692078422	0.026736178	0.175257732	99	0.159172587	0.206044462	0.142306372	-1.953609313
M4080	2B	138508909	0.026749236	0.226804124	99	0.159172587	0.206036185	0.142306372	1.64251545
M3532	2B	9887842	0.026752013	0.082474227	99	0.159172587	0.206034425	0.142306372	-2.926836691
M9926	5A	0	0.026770506	0.226804124	99	0.159172587	0.206022712	0.142306372	1.732229995
M10130	5A	462163976	0.026846367	0.443298969	99	0.159172587	0.205974751	0.142348192	-1.494891252
M10160	5A	446652509	0.026882772	0.494845361	99	0.159172587	0.205951786	0.142348192	-2.36349798
M9222	4A	720689979	0.027085503	0.278350515	99	0.159172587	0.205824498	0.142854604	1.534344021
M2256	1D	470523363	0.027255392	0.453608247	99	0.159172587	0.205718605	0.142854604	-2.982325132
M6612	3A	681663202	0.027283343	0.463917526	99	0.159172587	0.20570125	0.142854604	1.728393325
M9734	4D	16502547	0.027302043	0.24742268	99	0.159172587	0.20568965	0.142854604	-2.322732782
M2771	2A	432372670	0.02734354	0.463917526	99	0.159172587	0.205663937	0.142854604	3.097013318
M6786	3A	595019227	0.027476571	0.113402062	99	0.159172587	0.205581786	0.142854604	2.261336051
M7700	3B	665887152	0.027500871	0.278350515	99	0.159172587	0.205566825	0.142854604	1.992001759
M10461	5A	614408666	0.027516063	0.391752577	99	0.159172587	0.205557479	0.142854604	1.546397448
M3938	2B	652870583	0.027521973	0.412371134	99	0.159172587	0.205553845	0.142854604	-2.753237003
M3281	2A	773395688	0.027544556	0.474226804	99	0.159172587	0.205539966	0.142854604	3.401019641
M10080	5A	467370058	0.027554647	0.443298969	99	0.159172587	0.205533767	0.142854604	2.485292786
M1743	1B	193426988	0.027667767	0.422680412	99	0.159172587	0.205464451	0.14316888	2.572961887
M9898	5A	0	0.027740539	0.18556701	99	0.159172587	0.205420017	0.143188774	1.831670478
M5872	2D	584857821	0.027776627	0.278350515	99	0.159172587	0.205398028	0.143188774	-1.997279707
M12702	6A	277848418	0.028072387	0.340206186	99	0.159172587	0.205218948	0.144403895	1.662222488
M3631	2B	286756395	0.02811825	0.298969072	99	0.159172587	0.205191357	0.144403895	2.049173566
M10113	5A	472767669	0.028185193	0.350515464	99	0.159172587	0.20515117	0.144475605	1.946809744
M9234	4A	346700291	0.028331366	0.195876289	99	0.159172587	0.205063772	0.144952409	-1.735788548
M7463	3B	415924572	0.028525751	0.432989691	99	0.159172587	0.204948285	0.145639515	-1.8911322
M1632	1B	587501291	0.028601082	0.206185567	99	0.159172587	0.204903754	0.145639515	1.82483919
M8279	3D	10340203	0.028625882	0.350515464	99	0.159172587	0.204889121	0.145639515	2.104766913
M5910	2D	615707186	0.028800602	0.144329897	99	0.159172587	0.204786407	0.145983722	-2.195673697
M8621	4A	127984307	0.028872478	0.020618557	99	0.159172587	0.204744345	0.146076525	-4.096414412
M12673	6A	125507757	0.028991218	0.134020619	99	0.159172587	0.204675101	0.146244051	-1.883557016
M7692	3B	666791858	0.029012846	0.494845361	99	0.159172587	0.20466252	0.146244051	1.931348084
M10843	5B	0	0.029085137	0.371134021	99	0.159172587	0.204620544	0.146337947	3.34365884
M3828	2B	116410710	0.029364894	0.412371134	99	0.159172587	0.204459134	0.14697199	1.622245931
M5988	2D	786225684	0.029375773	0.164948454	99	0.159172587	0.20445289	0.14697199	-1.633140363
M5359	2D	2727249	0.029450517	0.381443299	99	0.159172587	0.204410058	0.14697199	-3.971061999
M13305	6B	346802293	0.029483518	0.453608247	99	0.159172587	0.204391184	0.14697199	-2.479469323
M11413	5B	233925191	0.029538442	0.206185567	99	0.159172587	0.204359821	0.14697199	-1.407421278
M6429	3A	517095336	0.029581785	0.381443299	99	0.159172587	0.204335114	0.14697199	3.921747475
M14314	7A	18681090	0.029690411	0.371134021	99	0.159172587	0.204273363	0.147210457	2.31443115
M10990	5B	584276433	0.02979774	0.309278351	99	0.159172587	0.204212584	0.147474479	1.70855914
M750	1B	12374383	0.029889864	0.350515464	99	0.159172587	0.204160602	0.147538075	-1.761550876
M12021	5D	704165878	0.029993853	0.24742268	99	0.159172587	0.204102127	0.147641223	-2.074040924
M3709	2B	79312880	0.030111579	0.494845361	99	0.159172587	0.204036187	0.147811509	1.512466245
M774	1B	89404769	0.030202119	0.237113402	99	0.159172587	0.20398566	0.147811509	-2.43538571
M14294	7A	0	0.030202371	0.360824742	99	0.159172587	0.20398552	0.147811509	-3.772851858
M4784	2B	733180507	0.030245259	0.412371134	99	0.159172587	0.203961641	0.147811509	2.13041103
M11104	5B	423757647	0.030488818	0.422680412	99	0.159172587	0.203826719	0.148216347	-1.833924475
M6184	3A	263177276	0.030510935	0.474226804	99	0.159172587	0.203814523	0.148216347	-1.493683455
M15174	7B	10160995	0.030545503	0.154639175	99	0.159172587	0.203795481	0.148216347	-2.406258902
M15184	7B	80326304	0.030545503	0.154639175	99	0.159172587	0.203795481	0.148216347	2.406258902
M9806	4D	250840711	0.030644186	0.402061856	99	0.159172587	0.203741247	0.148431074	-1.901443229
M3892	2B	110980776	0.030799158	0.175257732	99	0.159172587	0.203656449	0.148917205	1.985452298
M424	1A	506671585	0.030877713	0.309278351	99	0.159172587	0.203613639	0.149032783	2.088626159
M6017	3A	717909949	0.030936978	0.422680412	99	0.159172587	0.203581417	0.149055015	-1.827694923
M6801	3A	729897788	0.030994532	0.12371134	99	0.159172587	0.203550189	0.149068941	-2.05612889
M9384	4A	739304166	0.031159581	0.319587629	99	0.159172587	0.203460974	0.149261771	-1.439621574
M7108	3B	23684392	0.031162201	0.226804124	99	0.159172587	0.203459562	0.149261771	-1.827755135
M1608	1B	434594722	0.03119883	0.113402062	99	0.159172587	0.203439832	0.149261771	1.919264253
M3701	2B	38093674	0.031342828	0.360824742	99	0.159172587	0.203362509	0.149688078	-2.763891958
M9718	4D	3356525	0.031572146	0.12371134	99	0.159172587	0.203240146	0.150519655	-2.237017053
M11067	5B	415769223	0.031671897	0.175257732	99	0.159172587	0.203187213	0.150603267	1.94498753
M14961	7A	63940926	0.031700138	0.103092784	99	0.159172587	0.20317226	0.150603267	-2.031790728
M4571	2B	398349905	0.03188571	0.371134021	99	0.159172587	0.20307435	0.150863502	2.088574874
M15190	7B	89311430	0.032017581	0.072164948	99	0.159172587	0.20300514	0.150863502	-3.00529524
M3836	2B	105896043	0.032056863	0.381443299	99	0.159172587	0.202984582	0.150863502	2.281184724
M12864	6A	611334867	0.032065563	0.360824742	99	0.159172587	0.202980032	0.150863502	3.893125925
M773	1B	89404769	0.032149958	0.195876289	99	0.159172587	0.202935968	0.150863502	1.732590157
M12831	6A	604445823	0.032188886	0.309278351	99	0.159172587	0.202915685	0.150863502	-3.609126639
M4507	2B	690747730	0.032221939	0.474226804	99	0.159172587	0.202898483	0.150863502	1.806537873
M10847	5B	420193748	0.032238748	0.288659794	99	0.159172587	0.202889742	0.150863502	2.13544252
M3970	2B	227089235	0.032416457	0.391752577	99	0.159172587	0.202797628	0.150863502	2.060542946
M13523	6B	643641495	0.032469897	0.288659794	99	0.159172587	0.202770032	0.150863502	-2.277411846
M4948	2B	760119516	0.032568751	0.484536082	99	0.159172587	0.202719113	0.150863502	-1.424504187
M7194	3B	35451949	0.032572152	0.484536082	99	0.159172587	0.202717364	0.150863502	-1.677559116
M7090	3B	22917259	0.032710236	0.06185567	99	0.159172587	0.20264652	0.150863502	-3.048591754
M13613	6B	675702168	0.032813987	0.319587629	99	0.159172587	0.202593499	0.150863502	-2.692565199
M6709	3A	614087671	0.032926259	0.360824742	99	0.159172587	0.202536324	0.150863502	-1.999554699
M12040	6A	49592914	0.033139132	0.164948454	99	0.159172587	0.202428485	0.150863502	-2.078749287
M11291	5B	432894116	0.033167329	0.092783505	99	0.159172587	0.202414255	0.150863502	2.87990201
M13213	6B	141656076	0.033187794	0.463917526	99	0.159172587	0.202403936	0.150863502	1.859588916
M14718	7A	90552202	0.033213232	0.298969072	99	0.159172587	0.202391119	0.150863502	-1.524615517
M14993	7A	708846607	0.033244355	0.113402062	99	0.159172587	0.202375451	0.150863502	1.891868069
M35	1A	2185082	0.033315547	0.030927835	99	0.159172587	0.202339671	0.150863502	-3.733860761
M2096	1D	366012746	0.033357304	0.443298969	99	0.159172587	0.202318723	0.150863502	-2.888033006
M2122	1D	4811197	0.033379043	0.195876289	99	0.159172587	0.202307827	0.150863502	-2.088859501
M13717	6B	0	0.033743599	0.103092784	99	0.159172587	0.202126239	0.150863502	2.041573616
M15130	7A	734995323	0.033910731	0.010309278	99	0.159172587	0.202043685	0.150863502	-6.861773248
M15132	7A	734984251	0.033910731	0.010309278	99	0.159172587	0.202043685	0.150863502	-6.861773248
M10812	5B	355043560	0.033910731	0.010309278	99	0.159172587	0.202043685	0.150863502	6.861773248
M5953	2D	785879960	0.033910731	0.010309278	99	0.159172587	0.202043685	0.150863502	6.861773248
M7643	3B	492199973	0.033910731	0.010309278	99	0.159172587	0.202043685	0.150863502	6.861773248
M7886	3B	697680763	0.033910731	0.010309278	99	0.159172587	0.202043685	0.150863502	6.861773248
M7890	3B	752047577	0.033910731	0.010309278	99	0.159172587	0.202043685	0.150863502	6.861773248
M5229	2B	645000730	0.03397131	0.06185567	99	0.159172587	0.202013869	0.150863502	2.300532947
M13352	6B	188000081	0.033982271	0.216494845	99	0.159172587	0.20200848	0.150863502	2.023270983
M4951	2B	762073843	0.034031462	0.134020619	99	0.159172587	0.201984319	0.150863502	-1.89926272
M10955	5B	513241801	0.034144665	0.360824742	99	0.159172587	0.201928859	0.150863502	-4.137960972
M2710	2A	563950254	0.034156303	0.371134021	99	0.159172587	0.201923169	0.150863502	1.951624586
M3348	2A	643435780	0.034168503	0.412371134	99	0.159172587	0.201917205	0.150863502	-3.211472983
M15568	7B	672025248	0.03418377	0.154639175	99	0.159172587	0.201909746	0.150863502	-1.62788056
M8230	3B	282235521	0.034185802	0.216494845	99	0.159172587	0.201908754	0.150863502	-2.1255839
M8660	4A	321099074	0.034213774	0.082474227	99	0.159172587	0.201895097	0.150863502	-2.032509923
M13331	6B	152196806	0.034290494	0.350515464	99	0.159172587	0.201857702	0.150863502	1.335161447
M3135	2A	756929010	0.034323348	0.360824742	99	0.159172587	0.201841716	0.150863502	2.653834496
M332	1A	474702375	0.034331658	0.010309278	99	0.159172587	0.201837674	0.150863502	-5.096840086
M8218	3B	826654769	0.034331658	0.010309278	99	0.159172587	0.201837674	0.150863502	-5.096840086
M13792	6B	472897480	0.03434022	0.432989691	99	0.159172587	0.201833512	0.150863502	1.980708842
M13570	6B	572539293	0.034344608	0.432989691	99	0.159172587	0.201831379	0.150863502	1.331824792
M331	1A	474702375	0.034355055	0.319587629	99	0.159172587	0.201826303	0.150863502	5.163806398
M5882	2D	601401117	0.034470308	0.195876289	99	0.159172587	0.201770404	0.151126255	-2.070053743
M11317	5B	373116658	0.034574223	0.226804124	99	0.159172587	0.201720176	0.151130182	-1.655391363
M12814	6A	458483574	0.034582044	0.298969072	99	0.159172587	0.201716402	0.151130182	1.820563433
M14014	6D	339389407	0.034837247	0.463917526	99	0.159172587	0.201593754	0.151759062	2.0187507
M15496	7B	607525751	0.034972846	0.206185567	99	0.159172587	0.201528975	0.152094917	-1.855154561
M4499	2B	663838688	0.035025892	0.278350515	99	0.159172587	0.201503707	0.152094917	-1.66622553
M69	1A	10423224	0.035206063	0.360824742	99	0.159172587	0.201418185	0.152504888	-2.392824436
M3262	2A	770104270	0.035232152	0.226804124	99	0.159172587	0.20140584	0.152504888	-1.403535588
M4179	2B	75627521	0.035380673	0.360824742	99	0.159172587	0.201335747	0.152670351	-2.426511177
M12722	6A	584954409	0.035410557	0.144329897	99	0.159172587	0.201321682	0.152670351	-2.242793553
M3340	2A	766578300	0.035438332	0.06185567	99	0.159172587	0.20130862	0.152670351	-2.101835346
M1025	1B	129070027	0.035494869	0.340206186	99	0.159172587	0.201282066	0.152672724	-2.020820445
M833	1B	21523277	0.035601555	0.329896907	99	0.159172587	0.201232081	0.152811361	2.874214935
M6036	3A	0	0.035729741	0.402061856	99	0.159172587	0.201172234	0.152811361	2.632848733
M14539	7A	65604949	0.035783715	0.360824742	99	0.159172587	0.201147103	0.152811361	4.05584595
M863	1B	5609496	0.035823373	0.350515464	99	0.159172587	0.201128663	0.152811361	1.400541451
M5628	2D	593032041	0.036026066	0.113402062	99	0.159172587	0.201034757	0.152811361	2.290117917
M12238	6A	71414592	0.036123454	0.298969072	99	0.159172587	0.200989838	0.152811361	2.484611584
M13272	6B	106985833	0.036129207	0.020618557	99	0.159172587	0.200987188	0.152811361	4.576286937
M14398	7A	30008958	0.036298949	0.226804124	99	0.159172587	0.200909217	0.152811361	-1.957052978
M1317	1B	505491281	0.036316676	0.402061856	99	0.159172587	0.200901097	0.152811361	1.608382447
M8258	3D	6677623	0.036384048	0.371134021	99	0.159172587	0.200870273	0.152811361	-1.993844059
M10917	5B	455741036	0.036384809	0.278350515	99	0.159172587	0.200869925	0.152811361	2.290402317
M7935	3B	758346322	0.036416758	0.24742268	99	0.159172587	0.20085533	0.152811361	-1.673410428
M10326	5A	556225834	0.03647796	0.329896907	99	0.159172587	0.200827409	0.152811361	-1.48297709
M1666	1B	588503113	0.036514161	0.422680412	99	0.159172587	0.200810916	0.152811361	-1.302133315
M9224	4A	721826580	0.036650841	0.494845361	99	0.159172587	0.200748806	0.152811361	-1.856613162
M12019	5D	704165878	0.036684793	0.257731959	99	0.159172587	0.200733416	0.152811361	1.561218405
M13501	6B	600289035	0.036805024	0.360824742	99	0.159172587	0.200679038	0.152811361	3.602410214
M1883	1B	480971976	0.036815703	0.443298969	99	0.159172587	0.200674217	0.152811361	-2.467337202
M5728	2D	337092525	0.036823987	0.329896907	99	0.159172587	0.200670479	0.152811361	-1.635487436
M5694	2D	0	0.036826893	0.443298969	99	0.159172587	0.200669168	0.152811361	1.493581127
M8011	3B	533130365	0.036926896	0.134020619	99	0.159172587	0.200624111	0.152811361	2.048065678
M9586	4B	666525732	0.036928223	0.237113402	99	0.159172587	0.200623514	0.152811361	-1.688054629
M6619	3A	686200851	0.036968816	0.24742268	99	0.159172587	0.200605262	0.152811361	2.336853117
M9763	4D	370674103	0.037002021	0.360824742	99	0.159172587	0.200590349	0.152811361	1.725510529
M13151	6B	100895291	0.037040084	0.412371134	99	0.159172587	0.20057327	0.152811361	2.770368594
M3802	2B	456534362	0.037202617	0.206185567	99	0.159172587	0.200500555	0.152890322	-1.907527772
M9323	4A	0	0.037366027	0.154639175	99	0.159172587	0.200427787	0.152890322	1.948898477
M15430	7B	535456944	0.037494139	0.020618557	99	0.159172587	0.200370975	0.152890322	-4.206299841
M15384	7B	451187047	0.037494139	0.020618557	99	0.159172587	0.200370975	0.152890322	4.206299841
M2140	1D	688816452	0.037494139	0.020618557	99	0.159172587	0.200370975	0.152890322	4.206299841
M9978	5A	438355093	0.037506981	0.298969072	99	0.159172587	0.200365292	0.152890322	-1.447466511
M13574	6B	667201097	0.03753062	0.432989691	99	0.159172587	0.200354835	0.152890322	-1.521814462
M5918	2D	560626965	0.037640429	0.12371134	99	0.159172587	0.200306354	0.152890322	-2.684361735
M5611	2D	231460780	0.037671629	0.453608247	99	0.159172587	0.200292607	0.152890322	-1.76215578
M8599	4A	4240767	0.037740486	0.134020619	99	0.159172587	0.200262311	0.152890322	-2.27924301
M13853	6D	1414317	0.037773761	0.412371134	99	0.159172587	0.200247691	0.152890322	-1.606983798
M1775	1B	641140613	0.037788074	0.329896907	99	0.159172587	0.200241407	0.152890322	1.675617215
M32	1A	7078505	0.037891251	0.072164948	99	0.159172587	0.20019618	0.153006249	2.618815369
M536	1A	551910173	0.038041825	0.329896907	99	0.159172587	0.200130413	0.153006249	1.580851472
M14069	6D	451938140	0.038059768	0.453608247	99	0.159172587	0.200122594	0.153006249	-2.437026176
M10592	5B	18523119	0.038094053	0.113402062	99	0.159172587	0.200107666	0.153006249	-2.418118579
M10037	5A	445275979	0.038097301	0.494845361	99	0.159172587	0.200106252	0.153006249	2.160717292
M13842	6B	0	0.038166134	0.422680412	99	0.159172587	0.200076327	0.153006249	-1.369968639
M11862	5B	700001961	0.038448848	0.216494845	99	0.159172587	0.199954016	0.153006249	-2.408643257
M3297	2A	31477695	0.038541868	0.257731959	99	0.159172587	0.199913983	0.153006249	1.264204602
M8296	3D	17391691	0.0385585	0.350515464	99	0.159172587	0.199906836	0.153006249	1.89363345
M6817	3A	728057245	0.038622588	0.412371134	99	0.159172587	0.199879327	0.153006249	2.335935018
M4298	2B	556517600	0.038639525	0.206185567	99	0.159172587	0.199872065	0.153006249	2.063161211
M59	1A	150793813	0.038669791	0.278350515	99	0.159172587	0.199859096	0.153006249	1.468935903
M6176	3A	20238715	0.038780159	0.453608247	99	0.159172587	0.199811897	0.153006249	1.494676966
M6137	3A	286518666	0.038833787	0.072164948	99	0.159172587	0.199789015	0.153006249	-1.739935266
M13	1A	0	0.038870948	0.432989691	99	0.159172587	0.199773179	0.153006249	1.198439215
M2040	1D	711983266	0.038979345	0.484536082	99	0.159172587	0.199727077	0.153006249	3.708395037
M974	1B	0	0.039094554	0.278350515	99	0.159172587	0.199678228	0.153006249	-1.906001699
M10120	5A	340173231	0.039109124	0.443298969	99	0.159172587	0.199672061	0.153006249	1.505620114
M2803	2A	109064436	0.039112397	0.24742268	99	0.159172587	0.199670676	0.153006249	1.431317482
M9110	4A	142667251	0.039221758	0.030927835	99	0.159172587	0.199624471	0.153006249	3.993045557
M4854	2B	748703470	0.039326824	0.474226804	99	0.159172587	0.19958021	0.153006249	1.703410968
M3332	2A	0	0.039422405	0.432989691	99	0.159172587	0.199540055	0.153006249	1.9207249
M12292	6A	17317261	0.039534394	0.237113402	99	0.159172587	0.199493138	0.153006249	-1.449371991
M2036	1D	21254198	0.039716735	0.412371134	99	0.159172587	0.19941705	0.153006249	-1.627972859
M9116	4A	700739397	0.039730036	0.092783505	99	0.159172587	0.199411514	0.153006249	-2.25461227
M15047	7A	714340795	0.039740669	0.360824742	99	0.159172587	0.199407091	0.153006249	-3.298476881
M12254	6A	71319035	0.039795382	0.072164948	99	0.159172587	0.199384347	0.153006249	2.471721712
M11997	5D	553338175	0.039804977	0.484536082	99	0.159172587	0.199380362	0.153006249	-2.019784996
M10897	5B	525773748	0.039845215	0.154639175	99	0.159172587	0.199363662	0.153006249	1.996430344
M3794	2B	96381383	0.039883197	0.484536082	99	0.159172587	0.199347914	0.153006249	-2.215782209
M2325	2A	3539454	0.039958108	0.371134021	99	0.159172587	0.199316902	0.153006249	1.994492935
M9781	4D	446124259	0.039966881	0.340206186	99	0.159172587	0.199313274	0.153006249	-2.919510577
M14111	6D	470544254	0.040033981	0.278350515	99	0.159172587	0.199285554	0.153006249	1.935092149
M8118	3B	800129404	0.040078496	0.020618557	99	0.159172587	0.199267193	0.153006249	-3.930089575
M8005	3B	0	0.040117934	0.072164948	99	0.159172587	0.199250943	0.153006249	2.386106205
M4825	2B	749922381	0.040214042	0.319587629	99	0.159172587	0.199211415	0.153006249	2.542529674
M9245	4A	715176525	0.040236791	0.494845361	99	0.159172587	0.199202074	0.153006249	-1.809026709
M4245	2B	165245434	0.040332397	0.134020619	99	0.159172587	0.199162876	0.153006249	1.992251182
M178	1A	449179880	0.040400768	0.360824742	99	0.159172587	0.199134905	0.153006249	1.331617401
M5638	2D	0	0.040414471	0.494845361	99	0.159172587	0.199129305	0.153006249	-1.762494433
M14023	6D	357593819	0.040555663	0.329896907	99	0.159172587	0.199071724	0.153006249	1.651905161
M15156	7A	729332254	0.040620734	0.340206186	99	0.159172587	0.199045259	0.153006249	-6.497034713
M7892	3B	0	0.040620734	0.340206186	99	0.159172587	0.199045259	0.153006249	-6.497034713
M10809	5B	408227848	0.040620734	0.340206186	99	0.159172587	0.199045259	0.153006249	6.497034713
M2259	1D	471927480	0.040727566	0.474226804	99	0.159172587	0.199001907	0.153006249	1.315433099
M4366	2B	135437600	0.040737306	0.494845361	99	0.159172587	0.19899796	0.153006249	-1.919915188
M12101	6A	11577996	0.040900942	0.371134021	99	0.159172587	0.198931809	0.153006249	3.110614061
M10661	5B	71300457	0.040914561	0.18556701	99	0.159172587	0.198926317	0.153006249	1.919534486
M12980	6B	4863112	0.04099954	0.164948454	99	0.159172587	0.198892087	0.153006249	-1.597539294
M8192	3B	0	0.041025702	0.329896907	99	0.159172587	0.198881564	0.153006249	1.957000422
M5079	2B	765297108	0.041077696	0.453608247	99	0.159172587	0.198860672	0.153006249	1.324588057
M11660	5B	18994764	0.041101528	0.350515464	99	0.159172587	0.198851106	0.153006249	-5.089359497
M1049	1B	111514140	0.041101528	0.350515464	99	0.159172587	0.198851106	0.153006249	5.089359497
M11667	5B	495035120	0.041101528	0.350515464	99	0.159172587	0.198851106	0.153006249	5.089359497
M9124	4A	702727123	0.041101528	0.350515464	99	0.159172587	0.198851106	0.153006249	5.089359497
M11649	5B	600731527	0.041162773	0.020618557	99	0.159172587	0.198826549	0.153006249	5.014964458
M11668	5B	495035120	0.041162773	0.020618557	99	0.159172587	0.198826549	0.153006249	5.014964458
M10694	5B	78260556	0.041230207	0.195876289	99	0.159172587	0.198799555	0.153006249	-1.438223445
M11064	5B	449452466	0.041268593	0.164948454	99	0.159172587	0.198784211	0.153006249	-1.611822486
M911	1B	137436650	0.041295416	0.350515464	99	0.159172587	0.198773497	0.153006249	-4.089444424
M803	1B	19233594	0.041295416	0.350515464	99	0.159172587	0.198773497	0.153006249	4.089444424
M10876	5B	524047080	0.041518888	0.288659794	99	0.159172587	0.198684528	0.15330309	1.824576586
M585	1A	409523520	0.041537115	0.371134021	99	0.159172587	0.198677294	0.15330309	-1.743130061
M11006	5B	481080959	0.041684468	0.319587629	99	0.159172587	0.198618937	0.15330309	-1.579595513
M2926	2A	48402596	0.041690808	0.134020619	99	0.159172587	0.19861643	0.15330309	2.009624975
M4470	2B	617949676	0.041696812	0.381443299	99	0.159172587	0.198614058	0.15330309	1.199306226
M6457	3A	570114845	0.041769049	0.257731959	99	0.159172587	0.198585539	0.15330309	1.374468512
M6210	3A	577683980	0.04193362	0.082474227	99	0.159172587	0.198520763	0.153700243	-2.081657981
M4174	2B	388821817	0.042244911	0.175257732	99	0.159172587	0.198398978	0.15403215	1.563453221
M3349	2A	763430259	0.042249432	0.412371134	99	0.159172587	0.198397217	0.15403215	-2.519849676
M14016	6D	306139692	0.042477303	0.422680412	99	0.159172587	0.198308685	0.15403215	2.355180996
M2070	1D	38786196	0.04248592	0.18556701	99	0.159172587	0.198305347	0.15403215	-3.542510008
M5045	2B	0	0.04248592	0.18556701	99	0.159172587	0.198305347	0.15403215	-3.542510008
M3028	2A	706220041	0.042525361	0.463917526	99	0.159172587	0.198290079	0.15403215	-2.054598178
M10447	5A	612915484	0.042557849	0.474226804	99	0.159172587	0.198277513	0.15403215	2.136878289
M2115	1D	472550886	0.042659043	0.412371134	99	0.159172587	0.198238439	0.15403215	1.679602157
M4109	2B	384320443	0.042733314	0.443298969	99	0.159172587	0.198209824	0.15403215	2.562373921
M11939	5D	581361090	0.04274922	0.329896907	99	0.159172587	0.198203703	0.15403215	3.728959769
M13597	6B	675620421	0.042799427	0.298969072	99	0.159172587	0.198184398	0.15403215	-2.215499478
M1310	1B	462799871	0.042817078	0.350515464	99	0.159172587	0.198177616	0.15403215	-1.439581859
M10019	5A	386840959	0.042859772	0.360824742	99	0.159172587	0.198161226	0.15403215	1.424626474
M12842	6A	112239421	0.042941125	0.309278351	99	0.159172587	0.198130042	0.15403215	-1.427082463
M8783	4A	596971035	0.042968425	0.072164948	99	0.159172587	0.198119592	0.15403215	-2.286732309
M10	1A	0	0.043008759	0.154639175	99	0.159172587	0.198104165	0.15403215	-1.688223996
M1036	1B	46096564	0.043144196	0.030927835	99	0.159172587	0.198052478	0.15403215	3.694117321
M5621	2D	110910233	0.043149368	0.453608247	99	0.159172587	0.198050507	0.15403215	1.978720272
M10031	5A	436890364	0.043210197	0.268041237	99	0.159172587	0.198027352	0.15403215	1.986929182
M13521	6B	634042491	0.043210339	0.494845361	99	0.159172587	0.198027298	0.15403215	2.181499655
M10829	5B	397682273	0.04342348	0.319587629	99	0.159172587	0.197946439	0.154300625	2.321247477
M1418	1B	526750429	0.043567156	0.443298969	99	0.159172587	0.197892172	0.154300625	-1.82283558
M12481	6A	525593773	0.043622435	0.030927835	99	0.159172587	0.197871344	0.154300625	-3.273730832
M1697	1B	614393199	0.04366014	0.154639175	99	0.159172587	0.197857154	0.154300625	-1.85773308
M1791	1B	608599570	0.043898343	0.164948454	99	0.159172587	0.197767809	0.154300625	1.984806392
M6798	3A	729162982	0.043941537	0.226804124	99	0.159172587	0.197751663	0.154300625	-1.595997653
M1020	1B	170576130	0.044086958	0.268041237	99	0.159172587	0.19769743	0.154300625	-1.625370527
M10079	5A	467370058	0.044136664	0.216494845	99	0.159172587	0.197678937	0.154300625	1.490292083
M13048	6B	21459134	0.044149724	0.010309278	99	0.159172587	0.197674082	0.154300625	-6.915625191
M5634	2D	297509224	0.044149724	0.010309278	99	0.159172587	0.197674082	0.154300625	-6.915625191
M1039	1B	186525506	0.044149724	0.010309278	99	0.159172587	0.197674082	0.154300625	6.915625191
M1362	1B	691739942	0.044149724	0.010309278	99	0.159172587	0.197674082	0.154300625	6.915625191
M50	1A	0	0.044149724	0.010309278	99	0.159172587	0.197674082	0.154300625	6.915625191
M4069	2B	200573662	0.044194509	0.072164948	99	0.159172587	0.197657444	0.154300625	2.388297923
M10368	5A	689204261	0.044258985	0.422680412	99	0.159172587	0.197633522	0.154300625	1.915810946
M13578	6B	668513674	0.044421063	0.288659794	99	0.159172587	0.197573554	0.154300625	-1.411870347
M8058	3B	0	0.044495371	0.051546392	99	0.159172587	0.197546138	0.154300625	3.075484998
M6013	2D	0	0.044499881	0.360824742	99	0.159172587	0.197544476	0.154300625	3.68722946
M7785	3B	671011745	0.044529471	0.360824742	99	0.159172587	0.197533573	0.154300625	3.374618761
M1093	1B	180406792	0.044554655	0.309278351	99	0.159172587	0.1975243	0.154300625	-2.174810495
M570	1A	657508038	0.044613603	0.329896907	99	0.159172587	0.197502618	0.154300625	-1.367870797
M10943	5B	576920050	0.044775449	0.216494845	99	0.159172587	0.197443243	0.154300625	-1.827146316
M3435	2B	15951770	0.044777425	0.329896907	99	0.159172587	0.19744252	0.154300625	-1.747958483
M4098	2B	305774933	0.044989943	0.051546392	99	0.159172587	0.197364908	0.154300625	2.350674549
M726	1B	3164636	0.04502486	0.195876289	99	0.159172587	0.197352194	0.154300625	1.872184723
M10598	5B	20628549	0.045038419	0.164948454	99	0.159172587	0.19734726	0.154300625	-2.130027546
M9630	4B	653614624	0.045210593	0.268041237	99	0.159172587	0.197284741	0.154300625	-2.017867967
M6713	3A	669396058	0.045250078	0.319587629	99	0.159172587	0.19727044	0.154300625	-1.805818033
M9987	5A	333414537	0.045265165	0.24742268	99	0.159172587	0.197264979	0.154300625	-1.307141409
M3171	2A	648163092	0.045388366	0.453608247	99	0.159172587	0.197220457	0.154300625	1.887013799
M11768	5B	683514701	0.045488315	0.309278351	99	0.159172587	0.197184433	0.154300625	1.707610963
M9877	5A	429945514	0.04568276	0.360824742	99	0.159172587	0.197114593	0.154300625	2.631148199
M14670	7A	148468027	0.045768838	0.463917526	99	0.159172587	0.197083778	0.154300625	1.733466071
M6065	3A	143077788	0.045796311	0.134020619	99	0.159172587	0.197073956	0.154300625	-2.223483366
M13677	6B	705232815	0.045925756	0.041237113	99	0.159172587	0.197027762	0.154300625	2.903516332
M7776	3B	729922009	0.046091098	0.041237113	99	0.159172587	0.19696896	0.154300625	3.247981135
M2953	2A	689761057	0.04609643	0.226804124	99	0.159172587	0.196967068	0.154300625	-1.279433921
M2805	2A	180961400	0.046097761	0.340206186	99	0.159172587	0.196966595	0.154300625	-1.430544192
M5647	2D	613045526	0.046098362	0.144329897	99	0.159172587	0.196966382	0.154300625	1.752998984
M4578	2B	0	0.046163707	0.298969072	99	0.159172587	0.19694321	0.154300625	-1.647090173
M14780	7A	614780849	0.046217228	0.319587629	99	0.159172587	0.196924256	0.154300625	1.440299696
M5901	2D	606129207	0.046352078	0.412371134	99	0.159172587	0.196876605	0.154300625	2.543919966
M10865	5B	128642164	0.046359107	0.082474227	99	0.159172587	0.196874126	0.154300625	2.148402404
M657	1A	583529682	0.046424133	0.371134021	99	0.159172587	0.196851205	0.154300625	-2.894817173
M9215	4A	720887655	0.046519211	0.463917526	99	0.159172587	0.196817753	0.154300625	-1.672530878
M6763	3A	780291542	0.046546586	0.072164948	99	0.159172587	0.196808135	0.154300625	-2.279903639
M12961	6B	252495	0.046610068	0.402061856	99	0.159172587	0.196785855	0.154300625	1.778857461
M10572	5B	16185750	0.046643388	0.319587629	99	0.159172587	0.196774174	0.154300625	1.559273505
M9314	4A	730004142	0.046749427	0.474226804	99	0.159172587	0.196737058	0.154300625	1.766661808
M1437	1B	790223846	0.046848609	0.206185567	99	0.159172587	0.196702425	0.154300625	1.53686737
M10701	5B	127701540	0.046886614	0.494845361	99	0.159172587	0.196689174	0.154300625	2.066236992
M1538	1B	568960943	0.046996736	0.474226804	99	0.159172587	0.196650846	0.154300625	1.668826986
M13991	6D	122978486	0.047058255	0.422680412	99	0.159172587	0.196629476	0.154300625	-1.653517744
M6771	3A	0	0.047163474	0.154639175	99	0.159172587	0.196592995	0.154300625	-1.838906724
M12132	6A	5480626	0.047163818	0.237113402	99	0.159172587	0.196592876	0.154300625	-1.870658463
M12488	6A	358607782	0.047166125	0.072164948	99	0.159172587	0.196592077	0.154300625	2.497940009
M15005	7A	83638613	0.047189925	0.453608247	99	0.159172587	0.196583837	0.154300625	-2.613461284
M5262	2B	765884956	0.047267429	0.24742268	99	0.159172587	0.196557038	0.154300625	-1.53142516
M9230	4A	14039828	0.047329158	0.484536082	99	0.159172587	0.196535726	0.154300625	-1.17898899
M12058	6A	7901769	0.04749641	0.268041237	99	0.159172587	0.196478134	0.154300625	1.491857108
M7768	3B	13505175	0.047534276	0.06185567	99	0.159172587	0.196465125	0.154300625	-2.540170057
M13183	6B	116136635	0.047561886	0.391752577	99	0.159172587	0.196455647	0.154300625	-1.49077627
M163	1A	0	0.047694133	0.484536082	99	0.159172587	0.196410329	0.154300625	-1.250188848
M14378	7A	701571182	0.04775436	0.24742268	99	0.159172587	0.196389736	0.154300625	-1.543605446
M5255	2B	55935615	0.047776221	0.257731959	99	0.159172587	0.196382268	0.154300625	-1.598061544
M816	1B	183264864	0.047781028	0.494845361	99	0.159172587	0.196380626	0.154300625	1.587392473
M8174	3B	42802772	0.047794668	0.24742268	99	0.159172587	0.196375969	0.154300625	1.457010948
M9054	4A	660462703	0.047855167	0.103092784	99	0.159172587	0.196355329	0.154300625	-1.95723662
M1483	1B	554232742	0.047891898	0.360824742	99	0.159172587	0.196342812	0.154300625	-3.670845296
M3716	2B	79308806	0.047980216	0.175257732	99	0.159172587	0.196312756	0.154300625	-1.975391484
M8912	4A	32202337	0.048001113	0.051546392	99	0.159172587	0.196305653	0.154300625	2.056059753
M4473	2B	638230965	0.048097013	0.453608247	99	0.159172587	0.1962731	0.154300625	-1.538891811
M6759	3A	585937578	0.048107631	0.072164948	99	0.159172587	0.1962695	0.154300625	-2.377334706
M6838	3A	374475866	0.048306113	0.154639175	99	0.159172587	0.196202362	0.154300625	-1.509301079
M14062	6D	450169167	0.048314597	0.484536082	99	0.159172587	0.196199498	0.154300625	2.112387098
M320	1A	471700683	0.048396569	0.24742268	99	0.159172587	0.196171863	0.154300625	-1.433625605
M6532	3A	640751875	0.048436692	0.164948454	99	0.159172587	0.196158354	0.154300625	1.676846373
M9820	4D	30126321	0.048453957	0.412371134	99	0.159172587	0.196152545	0.154300625	-1.416901181
M6195	3A	22831857	0.048480569	0.082474227	99	0.159172587	0.196143595	0.154300625	-1.786854911
M3805	2B	575904883	0.048734224	0.381443299	99	0.159172587	0.196058553	0.154300625	-2.950458786
M9973	5A	65359644	0.048859923	0.453608247	99	0.159172587	0.196016587	0.154300625	2.016707404
M14813	7A	635682971	0.04898343	0.484536082	99	0.159172587	0.195975465	0.154300625	-2.003362484
M1855	1B	662038172	0.049076043	0.463917526	99	0.159172587	0.195944703	0.154300625	1.936721965
M10662	5B	71300457	0.04920411	0.195876289	99	0.159172587	0.195902266	0.154300625	-1.865547721
M5865	2D	601604653	0.049383547	0.360824742	99	0.159172587	0.195843007	0.154300625	1.611600613
M1918	1B	679383844	0.049455565	0.298969072	99	0.159172587	0.195819289	0.154300625	-3.536962702
M283	1A	403145168	0.049455565	0.298969072	99	0.159172587	0.195819289	0.154300625	-3.536962702
M6009	2D	761851219	0.049455565	0.298969072	99	0.159172587	0.195819289	0.154300625	3.536962702
M9117	4A	25288905	0.049502939	0.030927835	99	0.159172587	0.195803706	0.154300625	3.816825767
M6341	3A	108025232	0.049511655	0.103092784	99	0.159172587	0.195800841	0.154300625	-1.613196384
M6019	3A	9212189	0.049684872	0.474226804	99	0.159172587	0.195744014	0.154300625	-2.219907314
M1010	1B	39514123	0.04981042	0.340206186	99	0.159172587	0.195702958	0.154300625	-6.694761804
M1011	1B	270737840	0.04981042	0.340206186	99	0.159172587	0.195702958	0.154300625	-6.694761804
M10355	5A	567120913	0.04981042	0.340206186	99	0.159172587	0.195702958	0.154300625	-6.694761804
M11377	5B	99660656	0.04981042	0.340206186	99	0.159172587	0.195702958	0.154300625	-6.694761804
M1195	1B	111836824	0.04981042	0.340206186	99	0.159172587	0.195702958	0.154300625	-6.694761804
M4597	2B	0	0.04981042	0.340206186	99	0.159172587	0.195702958	0.154300625	-6.694761804
M1293	1B	420864193	0.04981042	0.340206186	99	0.159172587	0.195702958	0.154300625	6.694761803
M13708	6B	709011092	0.04981042	0.340206186	99	0.159172587	0.195702958	0.154300625	6.694761803
M2151	1D	417084354	0.04981042	0.340206186	99	0.159172587	0.195702958	0.154300625	6.694761803
M5913	2D	606124230	0.04981042	0.340206186	99	0.159172587	0.195702958	0.154300625	6.694761803
M6871	3A	741359064	0.04981042	0.340206186	99	0.159172587	0.195702958	0.154300625	6.694761803
M10208	5A	514092701	0.049940643	0.474226804	99	0.159172587	0.195660491	0.154300625	1.687992019
M5523	2D	168394797	0.050038158	0.443298969	99	0.159172587	0.195628768	0.154300625	1.671215847
M8399	3D	294644099	0.050116298	0.319587629	99	0.159172587	0.195603396	0.154300625	-1.550423143
M8954	4A	648906704	0.050215325	0.12371134	99	0.159172587	0.195571303	0.154300625	1.678359461
M2895	2A	0	0.050248114	0.432989691	99	0.159172587	0.195560692	0.154300625	1.241150799
M13953	6D	95594839	0.050301863	0.010309278	99	0.159172587	0.195543313	0.154300625	5.972261907
M2952	2A	691845663	0.050301863	0.010309278	99	0.159172587	0.195543313	0.154300625	5.972261907
M8717	4A	514257276	0.050447393	0.494845361	99	0.159172587	0.19549636	0.154300625	1.522455075
M1121	1B	39854453	0.050493679	0.309278351	99	0.159172587	0.195481457	0.154300625	-1.84373334
M6114	3A	32420986	0.050521354	0.494845361	99	0.159172587	0.195472553	0.154300625	-1.337368708
M6845	3A	329077007	0.050681654	0.463917526	99	0.159172587	0.195421084	0.154300625	-1.510613765
M1100	1B	94208133	0.050800082	0.298969072	99	0.159172587	0.195383171	0.154300625	1.679884154
M3933	2B	657506318	0.050860972	0.360824742	99	0.159172587	0.195363715	0.154300625	-1.523378233
M1322	1B	0	0.050917468	0.319587629	99	0.159172587	0.195345686	0.154300625	-3.338026555
M13393	6B	612219213	0.050987614	0.422680412	99	0.159172587	0.19532333	0.154300625	-2.172482484
M5556	2D	420984237	0.050992896	0.278350515	99	0.159172587	0.195321648	0.154300625	-1.325472821
M7089	3B	22917259	0.050995563	0.103092784	99	0.159172587	0.195320799	0.154300625	2.260990117
M3895	2B	118063648	0.051178635	0.206185567	99	0.159172587	0.195262619	0.154300625	1.352818227
M9121	4A	701045149	0.051213787	0.360824742	99	0.159172587	0.195251473	0.154300625	-3.803176452
M9118	4A	25288905	0.051213787	0.360824742	99	0.159172587	0.195251473	0.154300625	3.803176452
M5969	2D	0	0.051219369	0.329896907	99	0.159172587	0.195249704	0.154300625	-3.546171158
M9217	4A	726716286	0.05126874	0.474226804	99	0.159172587	0.195234065	0.154300625	-1.936646037
M2191	1D	13863738	0.051308731	0.195876289	99	0.159172587	0.19522141	0.154300625	-2.369816508
M4500	2B	663838688	0.051337916	0.298969072	99	0.159172587	0.195212181	0.154300625	1.84951815
M77	1A	14189304	0.051491711	0.402061856	99	0.159172587	0.19516364	0.154300625	-2.740403921
M10544	5B	1261539	0.051770761	0.154639175	99	0.159172587	0.195075964	0.154300625	-1.55483554
M508	1A	0	0.05178249	0.443298969	99	0.159172587	0.19507229	0.154300625	1.608158203
M1719	1B	629678307	0.051812265	0.371134021	99	0.159172587	0.195062967	0.154300625	-1.407737722
M12055	6A	1338546	0.051840702	0.494845361	99	0.159172587	0.195054068	0.154300625	1.877119251
M10472	5A	611631186	0.051886439	0.175257732	99	0.159172587	0.195039767	0.154300625	-1.93476375
M1287	1B	462987278	0.051897402	0.350515464	99	0.159172587	0.195036341	0.154300625	-3.697931003
M8739	4A	521603853	0.051930139	0.391752577	99	0.159172587	0.195026116	0.154300625	1.328617458
M5781	2D	611125588	0.051930272	0.443298969	99	0.159172587	0.195026074	0.154300625	-1.567365027
M13518	6B	635173407	0.052025228	0.381443299	99	0.159172587	0.194996454	0.154300625	1.666582369
M1559	1B	685243263	0.052042587	0.371134021	99	0.159172587	0.194991045	0.154300625	-2.152105388
M12416	6A	60075194	0.052108213	0.432989691	99	0.159172587	0.194970615	0.154300625	-2.093588416
M13680	6B	705935137	0.052181779	0.463917526	99	0.159172587	0.194947746	0.154300625	1.272494156
M10900	5B	562408622	0.052280329	0.030927835	99	0.159172587	0.194917164	0.154300625	-3.728476479
M5881	2D	601401117	0.052285705	0.329896907	99	0.159172587	0.194915498	0.154300625	-1.59144553
M4369	2B	0	0.052408551	0.268041237	99	0.159172587	0.194877468	0.154300625	1.616298536
M10301	5A	554978654	0.052447706	0.278350515	99	0.159172587	0.194865367	0.154300625	-1.566959542
M8669	4A	633786590	0.052457838	0.350515464	99	0.159172587	0.194862237	0.154300625	1.859370562
M9795	4D	481893268	0.052516153	0.12371134	99	0.159172587	0.194844237	0.154300625	-1.59550806
M4121	2B	305658684	0.052543997	0.463917526	99	0.159172587	0.194835649	0.154300625	-1.877809372
M521	1A	549511398	0.052550357	0.494845361	99	0.159172587	0.194833688	0.154300625	1.505897029
M11145	5B	502377352	0.052554684	0.288659794	99	0.159172587	0.194832354	0.154300625	1.660402251
M6696	3A	711289967	0.052555305	0.319587629	99	0.159172587	0.194832163	0.154300625	1.675601986
M13250	6B	128193460	0.052576168	0.082474227	99	0.159172587	0.194825733	0.154300625	-2.037615408
M12846	6A	607934652	0.052612439	0.257731959	99	0.159172587	0.194814562	0.154300625	-1.857027101
M9878	5A	429945514	0.052616665	0.06185567	99	0.159172587	0.194813261	0.154300625	-2.393187148
M6186	3A	320920365	0.052621479	0.402061856	99	0.159172587	0.194811779	0.154300625	-2.530719981
M3769	2B	631777145	0.052622109	0.278350515	99	0.159172587	0.194811585	0.154300625	2.18358167
M15473	7B	566408634	0.052771241	0.278350515	99	0.159172587	0.194765747	0.154300625	1.455131206
M9128	4A	699458953	0.052785629	0.381443299	99	0.159172587	0.194761333	0.154300625	-1.666731839
M5623	2D	490049382	0.052801965	0.453608247	99	0.159172587	0.194756322	0.154300625	-1.895527895
M557	1A	566590522	0.052872616	0.443298969	99	0.159172587	0.194734668	0.154300625	1.642666023
M14313	7A	18681090	0.052908391	0.340206186	99	0.159172587	0.194723716	0.154300625	-1.513078768
M1168	1B	34945936	0.052966521	0.082474227	99	0.159172587	0.194705937	0.154300625	2.164328737
M6050	3A	35214627	0.052975554	0.226804124	99	0.159172587	0.194703176	0.154300625	-1.863837642
M6047	3A	8645157	0.05308021	0.412371134	99	0.159172587	0.194671225	0.154300625	-3.007825535
M15000	7A	722383511	0.053259848	0.144329897	99	0.159172587	0.194616541	0.154300625	-2.284122481
M14982	7A	566622348	0.053293332	0.288659794	99	0.159172587	0.19460637	0.154300625	1.462271543
M9225	4A	729895722	0.053319433	0.432989691	99	0.159172587	0.194598446	0.154300625	-1.328007558
M14379	7A	0	0.053378348	0.216494845	99	0.159172587	0.194580577	0.154300625	1.867659298
M7282	3B	48788274	0.053563966	0.484536082	99	0.159172587	0.194524415	0.154300625	2.377678956
M4147	2B	184403011	0.053655256	0.06185567	99	0.159172587	0.19449687	0.154300625	-2.1546107
M3843	2B	136811320	0.053762231	0.175257732	99	0.159172587	0.194464657	0.154300625	2.093391471
M10979	5B	487906623	0.053844777	0.278350515	99	0.159172587	0.194439848	0.154300625	-1.767957382
M6345	3A	477135281	0.054120363	0.463917526	99	0.159172587	0.194357316	0.154300625	1.663498878
M554	1A	623968684	0.054165835	0.381443299	99	0.159172587	0.194343741	0.154300625	-1.304689376
M157	1A	748472420	0.05418299	0.453608247	99	0.159172587	0.194338624	0.154300625	-1.838360503
M3588	2B	25050436	0.054401688	0.453608247	99	0.159172587	0.194273531	0.154300625	-1.294840273
M1736	1B	635977802	0.054482236	0.278350515	99	0.159172587	0.194249628	0.154300625	1.48661834
M8194	3B	818284655	0.05451087	0.329896907	99	0.159172587	0.19424114	0.154300625	1.79012939
M14112	6D	470544254	0.054514	0.484536082	99	0.159172587	0.194240212	0.154300625	-1.963522816
M10984	5B	476248249	0.054528223	0.422680412	99	0.159172587	0.194235998	0.154300625	1.680480702
M10395	5A	577423494	0.054556461	0.309278351	99	0.159172587	0.194227635	0.154300625	-1.462701332
M3955	2B	454777720	0.05459133	0.072164948	99	0.159172587	0.194217315	0.154300625	-2.372829071
M5158	2B	782126877	0.054614607	0.226804124	99	0.159172587	0.194210429	0.154300625	1.424875558
M569	1A	657508038	0.054634858	0.371134021	99	0.159172587	0.194204441	0.154300625	1.288771005
M10599	5B	15127220	0.054639232	0.432989691	99	0.159172587	0.194203148	0.154300625	-2.549954961
M10700	5B	326575231	0.05469908	0.422680412	99	0.159172587	0.194185468	0.154300625	-2.00751933
M15182	7B	27599460	0.054765018	0.195876289	99	0.159172587	0.194166012	0.154300625	1.826414004
M6809	3A	0	0.054817555	0.340206186	99	0.159172587	0.194150529	0.154300625	-1.918867085
M5818	2D	606164081	0.054865294	0.154639175	99	0.159172587	0.194136473	0.154300625	-1.692600077
M5673	2D	606518197	0.054980977	0.24742268	99	0.159172587	0.194102468	0.154300625	1.650899748
M14365	7A	20403281	0.055047608	0.072164948	99	0.159172587	0.194082917	0.154300625	-2.130051401
M3689	2B	69047995	0.055055842	0.360824742	99	0.159172587	0.194080503	0.154300625	-1.786458461
M10150	5A	458524672	0.055064163	0.360824742	99	0.159172587	0.194078063	0.154300625	1.291797756
M13870	6D	3617227	0.055097949	0.257731959	99	0.159172587	0.194068162	0.154300625	1.860706374
M11976	5D	546924756	0.05515189	0.432989691	99	0.159172587	0.194052369	0.154300625	1.377283696
M2501	2A	36404881	0.055160308	0.402061856	99	0.159172587	0.194049906	0.154300625	2.223404979
M11815	5B	0	0.055227751	0.443298969	99	0.159172587	0.194030186	0.154300625	2.338955868
M1947	1B	0	0.055249628	0.381443299	99	0.159172587	0.194023795	0.154300625	1.892061308
M8601	4A	93968043	0.055284368	0.350515464	99	0.159172587	0.194013651	0.154300625	1.735674436
M14632	7A	128909455	0.055304244	0.144329897	99	0.159172587	0.194007851	0.154300625	-2.122056597
M9375	4A	733921790	0.055424721	0.432989691	99	0.159172587	0.193972741	0.154300625	-1.226130534
M7467	3B	179536207	0.055440419	0.144329897	99	0.159172587	0.193968173	0.154300625	-1.782757536
M6851	3A	726993854	0.055458068	0.474226804	99	0.159172587	0.193963038	0.154300625	1.044871733
M8219	3B	825858484	0.055465034	0.381443299	99	0.159172587	0.193961011	0.154300625	1.729343161
M13436	6B	126997677	0.055564462	0.257731959	99	0.159172587	0.19393212	0.154300625	1.879014555
M5595	2D	88591365	0.055631661	0.432989691	99	0.159172587	0.193912626	0.154300625	-2.133783953
M3499	2B	24690037	0.055645086	0.278350515	99	0.159172587	0.193908734	0.154300625	-1.782790989
M7929	3B	728890034	0.055649472	0.381443299	99	0.159172587	0.193907463	0.154300625	1.303340346
M14025	6D	78756505	0.055849364	0.463917526	99	0.159172587	0.193849644	0.154300625	-2.119274635
M1764	1B	639941356	0.056013582	0.072164948	99	0.159172587	0.19380231	0.154300625	2.330685437
M6437	3A	526866497	0.056017033	0.257731959	99	0.159172587	0.193801317	0.154300625	1.46301074
M1634	1B	0	0.056017719	0.12371134	99	0.159172587	0.193801119	0.154300625	1.684611389
M15189	7B	89311430	0.056056412	0.360824742	99	0.159172587	0.193789989	0.154300625	-3.615332026
M5548	2D	403470553	0.05606659	0.195876289	99	0.159172587	0.193787063	0.154300625	-1.888226808
M2812	2A	166864123	0.056069062	0.041237113	99	0.159172587	0.193786352	0.154300625	2.838340687
M11558	5B	571321830	0.056176351	0.175257732	99	0.159172587	0.193755542	0.154300625	-2.08027717
M12768	6A	597926078	0.056237217	0.020618557	99	0.159172587	0.19373809	0.154300625	3.164440261
M9813	4D	507006414	0.056245509	0.257731959	99	0.159172587	0.193735715	0.154300625	1.832418722
M10000	5A	390232148	0.05632541	0.329896907	99	0.159172587	0.19371284	0.154300625	-1.303900119
M6559	3A	651994615	0.056379359	0.134020619	99	0.159172587	0.193697416	0.154300625	1.811629543
M10794	5B	233380520	0.056412806	0.154639175	99	0.159172587	0.193687861	0.154300625	-1.383730002
M14788	7A	89214940	0.056590796	0.18556701	99	0.159172587	0.193637116	0.154553533	-1.761125048
M10347	5A	565612395	0.056618621	0.257731959	99	0.159172587	0.193629199	0.154553533	-1.463351779
M1264	1B	418051065	0.056776242	0.092783505	99	0.159172587	0.193584429	0.154828812	1.810667516
M14764	7A	545581545	0.056886949	0.030927835	99	0.159172587	0.193553065	0.154934088	3.538663507
M4539	2B	670299111	0.056991782	0.453608247	99	0.159172587	0.193523425	0.154934088	1.985218776
M823	1B	16427758	0.057020011	0.360824742	99	0.159172587	0.193515454	0.154934088	-1.814311351
M7516	3B	74352754	0.057140821	0.164948454	99	0.159172587	0.193481388	0.154934088	-1.844411996
M8737	4A	534555874	0.057210351	0.484536082	99	0.159172587	0.193461817	0.154934088	1.290217913
M5876	2D	601405924	0.057356891	0.257731959	99	0.159172587	0.193420655	0.154934088	1.376622635
M5983	2D	646478908	0.057362785	0.154639175	99	0.159172587	0.193419002	0.154934088	1.919041239
M5744	2D	596910467	0.057367192	0.474226804	99	0.159172587	0.193417766	0.154934088	-1.923120882
M14627	7A	124069487	0.057506586	0.484536082	99	0.159172587	0.193378723	0.154934088	-2.07634736
M9382	4A	732725652	0.057586134	0.381443299	99	0.159172587	0.193356489	0.154934088	-2.742719301
M2914	2A	15809369	0.057653823	0.329896907	99	0.159172587	0.193337595	0.154934088	1.377560038
M7187	3B	209287998	0.057761563	0.484536082	99	0.159172587	0.193307571	0.154934088	1.810446431
M700	1A	590240846	0.057967137	0.051546392	99	0.159172587	0.193250452	0.154934088	-2.426829835
M13224	6B	157131092	0.057967291	0.195876289	99	0.159172587	0.193250409	0.154934088	1.421420714
M6616	3A	683215818	0.058134248	0.06185567	99	0.159172587	0.193204181	0.154934088	-2.258180064
M13285	6B	217195685	0.058155026	0.402061856	99	0.159172587	0.193198438	0.154934088	-2.039064718
M13336	6B	0	0.058155026	0.402061856	99	0.159172587	0.193198438	0.154934088	2.039064718
M6072	3A	12868494	0.058156863	0.24742268	99	0.159172587	0.19319793	0.154934088	1.21003614
M9216	4A	720887655	0.058215144	0.237113402	99	0.159172587	0.193181833	0.154934088	-1.486187403
M3766	2B	91631796	0.058305317	0.020618557	99	0.159172587	0.193156963	0.154934088	3.721502289
M6766	3A	484068846	0.058319492	0.12371134	99	0.159172587	0.193153057	0.154934088	-1.732696772
M3142	2A	755679306	0.058388622	0.268041237	99	0.159172587	0.193134023	0.154934088	-1.159261664
M7907	3B	751756328	0.058431496	0.06185567	99	0.159172587	0.193122231	0.154934088	2.431750635
M12528	6A	0	0.058487081	0.144329897	99	0.159172587	0.193106956	0.154934088	1.852589025
M11695	5B	0	0.058674198	0.371134021	99	0.159172587	0.193055652	0.154934088	-1.838716244
M539	1A	701043681	0.058707486	0.412371134	99	0.159172587	0.193046544	0.154934088	-1.722737594
M553	1A	623968684	0.058707486	0.412371134	99	0.159172587	0.193046544	0.154934088	-1.722737594
M10802	5B	326118903	0.058751176	0.463917526	99	0.159172587	0.193034598	0.154934088	1.758459756
M8201	3B	825377413	0.058764792	0.340206186	99	0.159172587	0.193030877	0.154934088	-1.667294706
M6881	3A	609286936	0.058805449	0.226804124	99	0.159172587	0.193019771	0.154934088	-1.460991496
M7247	3B	658078022	0.058904409	0.278350515	99	0.159172587	0.192992775	0.154934088	1.612436925
M14477	7A	49592914	0.059041782	0.06185567	99	0.159172587	0.192955381	0.154934088	-2.297715841
M3199	2A	63622947	0.059047201	0.402061856	99	0.159172587	0.192953908	0.154934088	1.160508255
M3677	2B	38442340	0.059064556	0.237113402	99	0.159172587	0.19294919	0.154934088	1.545306354
M3861	2B	0	0.059155461	0.422680412	99	0.159172587	0.192924507	0.154934088	-2.237123212
M83	1A	14718514	0.059156162	0.391752577	99	0.159172587	0.192924317	0.154934088	1.578668121
M3180	2A	779809063	0.059358818	0.443298969	99	0.159172587	0.192869439	0.154934088	1.478549961
M12232	6A	13276649	0.059512447	0.432989691	99	0.159172587	0.192827971	0.154934088	-2.538384185
M15180	7B	25642597	0.059546141	0.164948454	99	0.159172587	0.192818892	0.154934088	-2.061559759
M5176	2B	0	0.059559388	0.474226804	99	0.159172587	0.192815324	0.154934088	-1.401634512
M8938	4A	684963131	0.059615249	0.309278351	99	0.159172587	0.192800288	0.154934088	-1.455527036
M8127	3B	596885708	0.059644535	0.381443299	99	0.159172587	0.192792411	0.154934088	1.443213184
M8914	4A	330012453	0.059669972	0.144329897	99	0.159172587	0.192785573	0.154934088	-1.752318817
M2310	1D	490369749	0.059676288	0.195876289	99	0.159172587	0.192783875	0.154934088	1.66111891
M1953	1B	260327837	0.059685024	0.371134021	99	0.159172587	0.192781528	0.154934088	-2.05834471
M12515	6A	143013871	0.059727725	0.381443299	99	0.159172587	0.192770059	0.154934088	2.608252577
M12973	6B	2460592	0.059744412	0.371134021	99	0.159172587	0.192765579	0.154934088	1.560405054
M12217	6A	13685433	0.059854641	0.298969072	99	0.159172587	0.192736022	0.154934088	-1.946762491
M11124	5B	698209017	0.059901149	0.402061856	99	0.159172587	0.192723569	0.154934088	1.686084094
M8559	4A	48889994	0.05998721	0.443298969	99	0.159172587	0.192700553	0.154934088	1.762476982
M2830	2A	579584012	0.06001858	0.350515464	99	0.159172587	0.192692172	0.154934088	1.5542413
M2764	2A	489635273	0.060109115	0.371134021	99	0.159172587	0.192668011	0.154934088	-1.52960107
M5734	2D	584768696	0.060128539	0.443298969	99	0.159172587	0.192662833	0.154934088	-2.101404709
M3676	2B	6409896	0.060155424	0.484536082	99	0.159172587	0.192655668	0.154934088	1.363839863
M8706	4A	25985745	0.060198414	0.051546392	99	0.159172587	0.192644219	0.154934088	-2.554816048
M8223	3B	829535069	0.060251729	0.340206186	99	0.159172587	0.192630032	0.154934088	1.604777382
M10653	5B	48874275	0.060269998	0.134020619	99	0.159172587	0.192625174	0.154934088	2.11958685
M13382	6B	449771887	0.060450928	0.24742268	99	0.159172587	0.192577147	0.154934088	1.31296818
M9143	4A	304763961	0.060563251	0.319587629	99	0.159172587	0.19254741	0.154934088	1.374153783
M1447	1B	747651868	0.060576117	0.391752577	99	0.159172587	0.192544007	0.154934088	1.276016148
M7197	3B	35473244	0.060646352	0.154639175	99	0.159172587	0.192525447	0.154934088	-1.77941731
M3509	2B	0	0.060711881	0.257731959	99	0.159172587	0.192508152	0.154934088	-1.644290527
M9541	4B	544293041	0.060906123	0.432989691	99	0.159172587	0.192457002	0.154934088	-1.311030136
M1516	1B	594654791	0.061151679	0.288659794	99	0.159172587	0.192392593	0.154934088	-1.312220448
M8873	4A	45129083	0.061181582	0.381443299	99	0.159172587	0.192384769	0.154934088	-1.887390331
M8151	3B	818871534	0.061200886	0.340206186	99	0.159172587	0.19237972	0.154934088	-5.553791608
M3220	2A	0	0.061200886	0.340206186	99	0.159172587	0.19237972	0.154934088	5.553791608
M6773	3A	58591208	0.061254509	0.340206186	99	0.159172587	0.192365704	0.154934088	-1.526600092
M10903	5B	438017042	0.061454572	0.371134021	99	0.159172587	0.192313529	0.154934088	-3.112016051
M7560	3B	479991691	0.061486099	0.082474227	99	0.159172587	0.192305324	0.154934088	2.34025889
M3395	2B	8311033	0.061536418	0.288659794	99	0.159172587	0.192292237	0.154934088	1.310262063
M402	1A	939984	0.061547505	0.484536082	99	0.159172587	0.192289356	0.154934088	1.671940212
M8668	4A	146943997	0.06157882	0.453608247	99	0.159172587	0.192281219	0.154934088	2.000305779
M1081	1B	85287651	0.061659858	0.175257732	99	0.159172587	0.192260183	0.154934088	-1.747559629
M13189	6B	118196899	0.061670534	0.391752577	99	0.159172587	0.192257414	0.154934088	1.918661643
M888	1B	0	0.061713189	0.319587629	99	0.159172587	0.192246356	0.154934088	-1.579872631
M12049	6A	5124270	0.061727846	0.195876289	99	0.159172587	0.192242558	0.154934088	-1.872541136
M13891	6D	6745747	0.061801321	0.494845361	99	0.159172587	0.192223534	0.154934088	-1.759853032
M14526	7A	66770346	0.061810625	0.134020619	99	0.159172587	0.192221127	0.154934088	1.796546705
M8985	4A	649883812	0.061812227	0.216494845	99	0.159172587	0.192220712	0.154934088	1.566317234
M2934	2A	138659939	0.061895299	0.113402062	99	0.159172587	0.192199237	0.154934088	-1.640913061
M5593	2D	708346816	0.06217389	0.412371134	99	0.159172587	0.192127445	0.154934088	1.776027192
M3984	2B	163977714	0.062210915	0.278350515	99	0.159172587	0.19211793	0.154934088	-1.435214534
M923	1B	385657223	0.062326125	0.381443299	99	0.159172587	0.192088362	0.154934088	2.903117562
M1308	1B	578521082	0.062368495	0.12371134	99	0.159172587	0.192077503	0.154934088	2.337131361
M5644	2D	587305772	0.062513645	0.237113402	99	0.159172587	0.192040362	0.154934088	1.458704774
M12277	6A	398955808	0.062572546	0.350515464	99	0.159172587	0.192025317	0.154934088	4.246763896
M1784	1B	557155175	0.062575999	0.268041237	99	0.159172587	0.192024436	0.154934088	1.180126397
M7483	3B	349954850	0.062578059	0.154639175	99	0.159172587	0.19202391	0.154934088	1.722065774
M12059	6A	7901769	0.062619526	0.453608247	99	0.159172587	0.192013328	0.154934088	1.609031049
M13697	6B	713822686	0.062739841	0.226804124	99	0.159172587	0.191982669	0.154934088	-1.559637857
M10736	5B	205114661	0.062801394	0.072164948	99	0.159172587	0.191967009	0.154934088	-2.169200539
M5946	2D	630122654	0.062903677	0.494845361	99	0.159172587	0.191941022	0.154934088	1.838805373
M10954	5B	518835133	0.062998224	0.463917526	99	0.159172587	0.191917042	0.154934088	-1.306784464
M7509	3B	485581903	0.063003555	0.350515464	99	0.159172587	0.191915691	0.154934088	-1.632324009
M13559	6B	593285120	0.063008319	0.309278351	99	0.159172587	0.191914484	0.154934088	-1.43157549
M2109	1D	276771068	0.063111353	0.484536082	99	0.159172587	0.1918884	0.154934088	-2.052916181
M463	1A	536653752	0.063351368	0.350515464	99	0.159172587	0.191827817	0.154934088	-2.864416807
M1382	1B	458326189	0.063452413	0.432989691	99	0.159172587	0.191802386	0.154934088	-1.368852441
M10189	5A	503430449	0.063454277	0.226804124	99	0.159172587	0.191801917	0.154934088	-1.653736408
M535	1A	551910173	0.063474623	0.432989691	99	0.159172587	0.191796802	0.154934088	1.490945259
M1394	1B	526750495	0.06348912	0.020618557	99	0.159172587	0.191793159	0.154934088	2.245746299
M8285	3D	9312378	0.063499929	0.360824742	99	0.159172587	0.191790443	0.154934088	1.760549966
M6129	3A	22234939	0.063555444	0.12371134	99	0.159172587	0.191776501	0.154934088	2.054566565
M10731	5B	264879872	0.063616771	0.103092784	99	0.159172587	0.191761115	0.154934088	-2.123870342
M6073	3A	13376403	0.063678552	0.412371134	99	0.159172587	0.191745631	0.154934088	2.028698205
M10844	5B	0	0.063693387	0.041237113	99	0.159172587	0.191741915	0.154934088	-3.090482895
M851	1B	0	0.063756329	0.319587629	99	0.159172587	0.191726161	0.154934088	-1.234402213
M9942	5A	52738363	0.063759219	0.030927835	99	0.159172587	0.191725439	0.154934088	2.877250828
M2871	2A	557403153	0.063830016	0.020618557	99	0.159172587	0.191707739	0.154934088	4.418614616
M15199	7B	103678623	0.063894403	0.402061856	99	0.159172587	0.191691661	0.154934088	-2.642294396
M1464	1B	557465111	0.063913092	0.237113402	99	0.159172587	0.191686998	0.154934088	1.330107499
M7948	3B	761498146	0.063979329	0.371134021	99	0.159172587	0.191670481	0.154934088	-2.808360216
M6964	3B	34165434	0.064031594	0.103092784	99	0.159172587	0.191657462	0.154934088	1.85443795
M3886	2B	75927726	0.064087456	0.103092784	99	0.159172587	0.191643559	0.154934088	2.327854544
M11922	5D	363181276	0.064103072	0.041237113	99	0.159172587	0.191639675	0.154934088	-2.984062678
M2968	2A	705551828	0.064193624	0.453608247	99	0.159172587	0.191617173	0.154934088	-1.360119444
M14392	7A	29138301	0.064266885	0.18556701	99	0.159172587	0.191598992	0.154934088	-1.422944073
M11961	5D	531606683	0.064273147	0.443298969	99	0.159172587	0.191597439	0.154934088	-1.381269794
M4448	2B	594205815	0.064286567	0.268041237	99	0.159172587	0.191594112	0.154934088	-1.37757616
M5618	2D	572257406	0.064300944	0.164948454	99	0.159172587	0.191590548	0.154934088	-1.564483431
M9153	4A	708632121	0.064349682	0.226804124	99	0.159172587	0.191578473	0.154934088	1.432392041
M1505	1B	57318239	0.064363319	0.443298969	99	0.159172587	0.191575096	0.154934088	-2.050867299
M13546	6B	479212545	0.064420773	0.144329897	99	0.159172587	0.191560877	0.154934088	1.605471181
M12824	6A	605225151	0.064433392	0.432989691	99	0.159172587	0.191557756	0.154934088	-1.890348146
M871	1B	2431679	0.064511532	0.144329897	99	0.159172587	0.191538444	0.154934088	1.899536214
M14502	7A	62750954	0.064645737	0.340206186	99	0.159172587	0.191505335	0.154934088	-2.101606443
M11648	5B	609144429	0.064658719	0.257731959	99	0.159172587	0.191502136	0.154934088	1.624091136
M3756	2B	392096989	0.064678468	0.453608247	99	0.159172587	0.191497271	0.154934088	-1.887297225
M4846	2B	0	0.064803003	0.113402062	99	0.159172587	0.191466631	0.154934088	-2.018500804
M10582	5B	21538502	0.065023388	0.278350515	99	0.159172587	0.191412565	0.154934088	1.326285864
M6783	3A	726107371	0.065032936	0.072164948	99	0.159172587	0.191410227	0.154934088	2.121516561
M1843	1B	578815386	0.0650401	0.484536082	99	0.159172587	0.191408473	0.154934088	-1.764796136
M544	1A	557295605	0.065349596	0.226804124	99	0.159172587	0.191332902	0.154934088	1.605389364
M1482	1B	555055838	0.065393889	0.350515464	99	0.159172587	0.191322118	0.154934088	-4.301538328
M11109	5B	515186754	0.065393889	0.350515464	99	0.159172587	0.191322118	0.154934088	4.301538328
M5773	2D	0	0.065393889	0.350515464	99	0.159172587	0.191322118	0.154934088	4.301538328
M6659	3A	699467553	0.065393889	0.350515464	99	0.159172587	0.191322118	0.154934088	4.301538328
M12149	6A	62668951	0.06556911	0.298969072	99	0.159172587	0.191279537	0.155214378	-1.447157877
M4969	2B	765063142	0.065708276	0.391752577	99	0.159172587	0.191245805	0.155289982	2.44035658
M5607	2D	14343154	0.065803472	0.12371134	99	0.159172587	0.191222776	0.155289982	1.782135596
M1409	1B	512275631	0.065831898	0.360824742	99	0.159172587	0.191215906	0.155289982	-1.338444648
M9738	4D	681466316	0.065839511	0.072164948	99	0.159172587	0.191214067	0.155289982	-1.884623234
M8937	4A	684963131	0.065885775	0.257731959	99	0.159172587	0.191202895	0.155289982	1.366567458
M6847	3A	738194828	0.066115518	0.422680412	99	0.159172587	0.19114754	0.15540826	-2.189677099
M14568	7A	83158962	0.066257316	0.463917526	99	0.159172587	0.19111348	0.15540826	-1.705119793
M3810	2B	104940392	0.06626353	0.453608247	99	0.159172587	0.191111989	0.15540826	-2.36266371
M13103	6B	39302769	0.066291941	0.443298969	99	0.159172587	0.191105175	0.15540826	-1.796393155
M6218	3A	164139970	0.066292496	0.319587629	99	0.159172587	0.191105042	0.15540826	-1.245536692
M8104	3B	805555961	0.066419853	0.381443299	99	0.159172587	0.191074535	0.15540826	2.067101693
M10963	5B	567730502	0.066436128	0.391752577	99	0.159172587	0.191070641	0.15540826	-1.485605076
M11789	5B	687326007	0.066475581	0.381443299	99	0.159172587	0.191061206	0.15540826	-2.645891388
M8206	3B	743193869	0.066478661	0.340206186	99	0.159172587	0.19106047	0.15540826	1.745089364
M3301	2A	0	0.066596835	0.412371134	99	0.159172587	0.191032246	0.15540826	1.403301475
M5606	2D	548606801	0.066600968	0.319587629	99	0.159172587	0.191031261	0.15540826	1.214820352
M8462	3D	150762205	0.066619823	0.144329897	99	0.159172587	0.191026763	0.15540826	1.695832463
M4995	2B	528759744	0.066831961	0.216494845	99	0.159172587	0.190976253	0.155525014	-1.500990385
M12022	5D	704165878	0.066982432	0.474226804	99	0.159172587	0.190940533	0.155525014	-1.838147019
M2718	2A	44973108	0.066985769	0.443298969	99	0.159172587	0.190939741	0.155525014	-1.706932326
M15329	7B	147686272	0.067095025	0.12371134	99	0.159172587	0.190913861	0.155525014	-1.88266452
M619	1A	579302653	0.067104407	0.154639175	99	0.159172587	0.19091164	0.155525014	1.595878595
M7287	3B	50022030	0.067236023	0.443298969	99	0.159172587	0.190880528	0.155525014	-1.6168013
M10849	5B	664263082	0.067271081	0.24742268	99	0.159172587	0.190872252	0.155525014	1.404002347
M3954	2B	419769571	0.067292602	0.195876289	99	0.159172587	0.190867174	0.155525014	1.745871484
M6355	3A	478166064	0.067315995	0.134020619	99	0.159172587	0.190861657	0.155525014	-1.590267784
M11921	5D	363181276	0.067336722	0.360824742	99	0.159172587	0.19085677	0.155525014	3.159968464
M7515	3B	74352754	0.067405281	0.309278351	99	0.159172587	0.190840616	0.155525014	1.751326079
M6718	3A	714450654	0.067405803	0.371134021	99	0.159172587	0.190840493	0.155525014	-1.521882917
M519	1A	548790406	0.067411282	0.443298969	99	0.159172587	0.190839202	0.155525014	-1.252862651
M12974	6B	2460592	0.067550653	0.443298969	99	0.159172587	0.190806422	0.155714819	1.956951386
M14099	6D	463549451	0.067693125	0.402061856	99	0.159172587	0.190772989	0.155911445	1.747221721
M10796	5B	395591316	0.067792654	0.134020619	99	0.159172587	0.190749678	0.15599376	1.902537669
M6827	3A	742590041	0.067851089	0.402061856	99	0.159172587	0.190736009	0.15599376	-2.151208671
M7154	3B	24262407	0.067904348	0.319587629	99	0.159172587	0.190723562	0.15599376	2.351220301
M8624	4A	114487333	0.067957678	0.350515464	99	0.159172587	0.190711109	0.15599376	1.219513417
M11953	5D	543270056	0.068197349	0.350515464	99	0.159172587	0.190655275	0.156301784	2.848509073
M1993	1D	8463818	0.068206499	0.360824742	99	0.159172587	0.190653148	0.156301784	1.82885128
M1566	1B	592833254	0.068514224	0.371134021	99	0.159172587	0.190581783	0.156641199	1.164156303
M3913	2B	63622881	0.068699257	0.020618557	99	0.159172587	0.190539039	0.156641199	-4.54852653
M8040	3B	384669073	0.068699257	0.020618557	99	0.159172587	0.190539039	0.156641199	-4.54852653
M8038	3B	781986106	0.068699257	0.020618557	99	0.159172587	0.190539039	0.156641199	4.54852653
M8039	3B	384669073	0.068699257	0.020618557	99	0.159172587	0.190539039	0.156641199	4.54852653
M8176	3B	818773933	0.068784689	0.494845361	99	0.159172587	0.190519346	0.156690284	-2.003660889
M8523	3D	612028308	0.068835702	0.453608247	99	0.159172587	0.190507599	0.156690284	-1.770722364
M8590	4A	85574825	0.068925455	0.422680412	99	0.159172587	0.190486955	0.156763734	2.268447722
M8133	3B	303789579	0.069184395	0.371134021	99	0.159172587	0.190427561	0.15699954	-1.516841259
M563	1A	570134003	0.069205293	0.391752577	99	0.159172587	0.190422778	0.15699954	-1.181307147
M7360	3B	143666791	0.069479374	0.216494845	99	0.159172587	0.190360194	0.15699954	-1.423870954
M4072	2B	236583792	0.0694824	0.164948454	99	0.159172587	0.190359505	0.15699954	1.882490262
M1284	1B	392145668	0.069503495	0.257731959	99	0.159172587	0.190354699	0.15699954	1.56111766
M11998	5D	553338175	0.06951392	0.360824742	99	0.159172587	0.190352325	0.15699954	-1.097606449
M10838	5B	457530664	0.069527211	0.350515464	99	0.159172587	0.190349299	0.15699954	-3.828126992
M6823	3A	731113205	0.069738747	0.051546392	99	0.159172587	0.190301216	0.15699954	2.587835295
M13507	6B	502906219	0.06975464	0.402061856	99	0.159172587	0.19029761	0.15699954	2.881269624
M12050	6A	5124270	0.069794186	0.041237113	99	0.159172587	0.190288641	0.15699954	2.804252083
M10976	5B	398577805	0.069819834	0.278350515	99	0.159172587	0.190282827	0.15699954	-1.474869354
M5845	2D	591437758	0.069848156	0.412371134	99	0.159172587	0.190276409	0.15699954	2.200680099
M5860	2D	587648696	0.069848156	0.412371134	99	0.159172587	0.190276409	0.15699954	2.200680099
M12410	6A	42803388	0.070087117	0.020618557	99	0.159172587	0.190222375	0.15699954	4.072004423
M13066	6B	31488518	0.070120365	0.144329897	99	0.159172587	0.190214873	0.15699954	1.629882125
M1312	1B	328983636	0.070149375	0.082474227	99	0.159172587	0.19020833	0.15699954	-2.685501167
M6715	3A	579047670	0.070155143	0.381443299	99	0.159172587	0.19020703	0.15699954	-1.47356142
M8059	3B	781113311	0.07020273	0.134020619	99	0.159172587	0.190196305	0.15699954	-1.882393676
M7387	3B	714302155	0.070293016	0.164948454	99	0.159172587	0.190175978	0.15699954	1.385018148
M6820	3A	727518767	0.070296268	0.092783505	99	0.159172587	0.190175247	0.15699954	-1.774525041
M12728	6A	0	0.070385065	0.391752577	99	0.159172587	0.190155284	0.15699954	-1.462466157
M14971	7A	621160098	0.070400119	0.072164948	99	0.159172587	0.190151902	0.15699954	-1.976077167
M7242	3B	43051220	0.070436302	0.237113402	99	0.159172587	0.190143777	0.15699954	-1.574066821
M1256	1B	510601562	0.070494548	0.164948454	99	0.159172587	0.190130708	0.15699954	-1.848210729
M4274	2B	658486253	0.070704593	0.288659794	99	0.159172587	0.190083676	0.15699954	1.345262224
M3972	2B	128269909	0.070855237	0.443298969	99	0.159172587	0.190050038	0.15699954	-1.225899458
M6588	3A	496490823	0.070870251	0.484536082	99	0.159172587	0.19004669	0.15699954	-1.07011306
M4368	2B	459249657	0.071001143	0.103092784	99	0.159172587	0.190017532	0.15699954	-2.474362599
M5167	2B	779863093	0.07100648	0.041237113	99	0.159172587	0.190016345	0.15699954	-3.192920079
M10919	5B	455980608	0.071008884	0.092783505	99	0.159172587	0.19001581	0.15699954	2.376943825
M2016	1D	13713162	0.071101814	0.391752577	99	0.159172587	0.189995146	0.15699954	-1.448779612
M13484	6B	631806635	0.071106406	0.453608247	99	0.159172587	0.189994126	0.15699954	2.187864668
M5038	2B	769950936	0.071124653	0.144329897	99	0.159172587	0.189990073	0.15699954	1.417755163
M8682	4A	118271965	0.071151704	0.371134021	99	0.159172587	0.189984066	0.15699954	1.560923067
M3885	2B	75927726	0.071242062	0.412371134	99	0.159172587	0.189964018	0.15699954	2.260988396
M6321	3A	434822187	0.071311243	0.381443299	99	0.159172587	0.189948687	0.15699954	2.30857228
M14424	7A	35387463	0.071534504	0.463917526	99	0.159172587	0.189899323	0.15699954	1.648195904
M837	1B	19772673	0.071672358	0.051546392	99	0.159172587	0.189868927	0.15699954	-2.65187374
M8130	3B	803849255	0.071715695	0.06185567	99	0.159172587	0.189859385	0.15699954	-2.255105181
M14026	6D	78756505	0.071721765	0.350515464	99	0.159172587	0.189858048	0.15699954	1.496960206
M6260	3A	35421181	0.071727909	0.226804124	99	0.159172587	0.189856696	0.15699954	1.51519678
M4442	2B	640489568	0.071732059	0.371134021	99	0.159172587	0.189855783	0.15699954	2.523664333
M1469	1B	42142948	0.07177653	0.082474227	99	0.159172587	0.189846	0.15699954	-1.751680775
M11911	5D	88471253	0.071828806	0.412371134	99	0.159172587	0.189834508	0.15699954	-1.477629355
M15131	7A	734984251	0.071861149	0.360824742	99	0.159172587	0.189827402	0.15699954	-3.601821137
M6767	3A	489299704	0.071878132	0.072164948	99	0.159172587	0.189823673	0.15699954	2.104917926
M7245	3B	0	0.071922334	0.24742268	99	0.159172587	0.18981397	0.15699954	-1.568375345
M13289	6B	230607608	0.072123256	0.422680412	99	0.159172587	0.189769949	0.15699954	-1.84563349
M6360	3A	480442075	0.072179185	0.432989691	99	0.159172587	0.189757719	0.15699954	-1.589389339
M14418	7A	33369174	0.072234466	0.350515464	99	0.159172587	0.189745641	0.15699954	1.423784849
M15159	7B	673044	0.072501005	0.391752577	99	0.159172587	0.189687546	0.15699954	-2.452060864
M3432	2B	172205833	0.072508486	0.072164948	99	0.159172587	0.189685919	0.15699954	-1.935041474
M6680	3A	709595134	0.072565002	0.113402062	99	0.159172587	0.189673632	0.15699954	-1.60817767
M12028	5D	0	0.072583815	0.030927835	99	0.159172587	0.189669544	0.15699954	3.075536095
M7985	3B	760719226	0.072659056	0.030927835	99	0.159172587	0.189653207	0.15699954	-2.933379253
M719	1B	6072803	0.072774867	0.422680412	99	0.159172587	0.189628097	0.15699954	-1.462293456
M4122	2B	305658684	0.07292229	0.154639175	99	0.159172587	0.189596197	0.15699954	1.922238894
M1275	1B	432597563	0.072962418	0.350515464	99	0.159172587	0.189587525	0.15699954	2.199754666
M7596	3B	22083131	0.072988115	0.082474227	99	0.159172587	0.189581975	0.15699954	1.615151077
M4287	2B	159563563	0.073145646	0.463917526	99	0.159172587	0.189547998	0.15699954	1.842388116
M9091	4A	690936373	0.073199599	0.309278351	99	0.159172587	0.18953638	0.15699954	-1.940094808
M2047	1D	10650564	0.073324239	0.268041237	99	0.159172587	0.189509575	0.15699954	1.880445205
M8283	3D	7272771	0.073476938	0.329896907	99	0.159172587	0.189476804	0.15699954	-1.7495402
M8243	3D	0	0.073476938	0.329896907	99	0.159172587	0.189476804	0.15699954	1.7495402
M4139	2B	389136726	0.073618367	0.360824742	99	0.159172587	0.189446517	0.15699954	2.745091931
M4437	2B	658484745	0.073651369	0.309278351	99	0.159172587	0.189439459	0.15699954	-1.241465335
M12076	6A	5480595	0.073671027	0.144329897	99	0.159172587	0.189435256	0.15699954	1.851655746
M11177	5B	0	0.073728714	0.06185567	99	0.159172587	0.189422931	0.15699954	2.61759129
M1412	1B	0	0.0737992	0.340206186	99	0.159172587	0.189407885	0.15699954	-1.500619001
M8646	4A	413875836	0.073834016	0.350515464	99	0.159172587	0.189400459	0.15699954	-1.574013917
M8208	3B	828627115	0.07385234	0.340206186	99	0.159172587	0.189396552	0.15699954	1.365581684
M15173	7B	10160995	0.07392698	0.360824742	99	0.159172587	0.189380649	0.15699954	-1.313599835
M176	1A	35112909	0.073971729	0.278350515	99	0.159172587	0.189371122	0.15699954	1.453262884
M11190	5B	425653407	0.074221726	0.350515464	99	0.159172587	0.189318019	0.15699954	2.259305065
M14894	7A	694675632	0.074356987	0.268041237	99	0.159172587	0.189289369	0.15699954	-1.504800163
M13060	6B	21144090	0.074465397	0.484536082	99	0.159172587	0.189266448	0.15699954	-1.114074597
M11248	5B	513202029	0.074483182	0.092783505	99	0.159172587	0.189262691	0.15699954	1.997246871
M11037	5B	0	0.074531183	0.494845361	99	0.159172587	0.189252556	0.15699954	1.613679613
M10631	5B	685117897	0.074562795	0.041237113	99	0.159172587	0.189245885	0.15699954	2.719935745
M8312	3D	28573708	0.074668518	0.340206186	99	0.159172587	0.189223599	0.15699954	-1.723898718
M8309	3D	27672263	0.074668518	0.340206186	99	0.159172587	0.189223599	0.15699954	1.723898718
M8325	3D	310971726	0.074668518	0.340206186	99	0.159172587	0.189223599	0.15699954	1.723898718
M14843	7A	316013593	0.074721193	0.175257732	99	0.159172587	0.189212508	0.15699954	-1.651333332
M14848	7A	677609350	0.074721193	0.175257732	99	0.159172587	0.189212508	0.15699954	-1.651333332
M10521	5A	691820950	0.07475748	0.463917526	99	0.159172587	0.189204872	0.15699954	-1.772182277
M1804	1B	655311824	0.074785047	0.319587629	99	0.159172587	0.189199074	0.15699954	-1.015009818
M6212	3A	18393905	0.074840557	0.144329897	99	0.159172587	0.189187406	0.15699954	1.761819958
M10618	5B	323956274	0.074876638	0.402061856	99	0.159172587	0.189179827	0.15699954	0.958741904
M14516	7A	57742411	0.074925456	0.391752577	99	0.159172587	0.189169579	0.15699954	1.104697066
M5624	2D	490049382	0.07495394	0.113402062	99	0.159172587	0.189163603	0.15699954	-1.799498614
M1403	1B	333219089	0.075042165	0.371134021	99	0.159172587	0.189145108	0.15699954	1.290769335
M4737	2B	682744936	0.075045675	0.216494845	99	0.159172587	0.189144373	0.15699954	1.261885656
M6793	3A	729609868	0.075170651	0.412371134	99	0.159172587	0.189118217	0.15699954	-2.170364515
M8092	3B	808502629	0.075185078	0.319587629	99	0.159172587	0.1891152	0.15699954	1.298189495
M11057	5B	0	0.075283343	0.020618557	99	0.159172587	0.189094672	0.15699954	-3.235827734
M6277	3A	41376359	0.075440644	0.381443299	99	0.159172587	0.189061871	0.15699954	-1.187390002
M9874	5A	27509864	0.075480078	0.422680412	99	0.159172587	0.18905366	0.15699954	-1.24844293
M2472	2A	19484111	0.075561499	0.319587629	99	0.159172587	0.189036721	0.15699954	1.621962256
M8633	4A	531682048	0.075829592	0.494845361	99	0.159172587	0.188981086	0.15699954	1.831783637
M8623	4A	114487333	0.075887326	0.484536082	99	0.159172587	0.188969134	0.15699954	-1.301522191
M7895	3B	211212780	0.075915473	0.298969072	99	0.159172587	0.18896331	0.15699954	1.220260907
M3166	2A	759821777	0.076016262	0.340206186	99	0.159172587	0.188942476	0.15699954	1.382007374
M4576	2B	692104873	0.076106865	0.092783505	99	0.159172587	0.188923773	0.15699954	1.63401267
M75	1A	0	0.07611181	0.412371134	99	0.159172587	0.188922753	0.15699954	2.124422407
M13529	6B	655890375	0.076127897	0.237113402	99	0.159172587	0.188919435	0.15699954	2.125717901
M788	1B	81660700	0.076131591	0.298969072	99	0.159172587	0.188918673	0.15699954	1.286497666
M188	1A	46644205	0.076131821	0.309278351	99	0.159172587	0.188918625	0.15699954	1.4100437
M13825	6B	39775683	0.076254037	0.18556701	99	0.159172587	0.188893444	0.15699954	-1.217675234
M7246	3B	0	0.076263262	0.432989691	99	0.159172587	0.188891545	0.15699954	-1.611526125
M4056	2B	0	0.076401476	0.484536082	99	0.159172587	0.188863125	0.15699954	-1.569413323
M8098	3B	702728099	0.076440319	0.164948454	99	0.159172587	0.188855148	0.15699954	-1.354886395
M14976	7A	711824297	0.076499302	0.12371134	99	0.159172587	0.188843043	0.15699954	2.262700017
M3715	2B	79308806	0.076572379	0.474226804	99	0.159172587	0.18882806	0.15699954	-1.864945746
M6697	3A	711287701	0.076669064	0.412371134	99	0.159172587	0.188808261	0.15699954	-1.269610202
M14999	7A	722383511	0.076681897	0.463917526	99	0.159172587	0.188805635	0.15699954	-2.25700596
M7169	3B	37403983	0.076693269	0.329896907	99	0.159172587	0.188803309	0.15699954	-3.1661105
M1820	1B	346227510	0.076881231	0.309278351	99	0.159172587	0.188764909	0.15699954	1.372886385
M11013	5B	479839969	0.077033642	0.484536082	99	0.159172587	0.188733847	0.15699954	-1.563779671
M12015	5D	0	0.077143178	0.072164948	99	0.159172587	0.188711565	0.15699954	-2.026802897
M1960	1B	683413188	0.077264353	0.309278351	99	0.159172587	0.188686956	0.15699954	-1.951527934
M13465	6B	326519277	0.077296694	0.020618557	99	0.159172587	0.188680395	0.15699954	4.053938008
M6414	3A	509564298	0.07731309	0.226804124	99	0.159172587	0.18867707	0.15699954	1.471767732
M1826	1B	0	0.077338289	0.360824742	99	0.159172587	0.188671961	0.15699954	-1.33384969
M3937	2B	652870583	0.077467426	0.092783505	99	0.159172587	0.188645809	0.15699954	-1.973653536
M14081	6D	459549228	0.077516242	0.412371134	99	0.159172587	0.188635935	0.15699954	-1.670940686
M2280	1D	484303414	0.077576713	0.340206186	99	0.159172587	0.188623713	0.15699954	2.463365181
M549	1A	42812462	0.077640758	0.391752577	99	0.159172587	0.188610781	0.15699954	-2.10310303
M2020	1D	16297590	0.07770264	0.391752577	99	0.159172587	0.188598296	0.15699954	-1.24573071
M14800	7A	580656999	0.077813278	0.381443299	99	0.159172587	0.188576001	0.15699954	-1.514169054
M12479	6A	199016535	0.077848651	0.072164948	99	0.159172587	0.188568881	0.15699954	-2.443728712
M8238	3B	825858454	0.077931591	0.360824742	99	0.159172587	0.188552199	0.15699954	1.260439682
M14154	7A	2862136	0.07795094	0.371134021	99	0.159172587	0.18854831	0.15699954	1.622184905
M3373	2A	646343478	0.078061763	0.309278351	99	0.159172587	0.188526056	0.15699954	1.903088685
M15369	7B	451485910	0.078211035	0.288659794	99	0.159172587	0.188496136	0.15699954	-1.023705568
M6769	3A	0	0.078375792	0.402061856	99	0.159172587	0.188463185	0.15699954	-2.135260663
M15331	7B	0	0.078584078	0.474226804	99	0.159172587	0.188421637	0.15699954	-2.050598728
M5604	2D	551361616	0.07868979	0.144329897	99	0.159172587	0.188400596	0.15699954	1.620466314
M11234	5B	527149386	0.078825423	0.195876289	99	0.159172587	0.188373644	0.15699954	1.817757858
M12057	6A	7901769	0.078875951	0.432989691	99	0.159172587	0.188363617	0.15699954	1.708704862
M4662	2B	692615324	0.078923362	0.298969072	99	0.159172587	0.188354214	0.15699954	-1.557986128
M12261	6A	319197077	0.078976898	0.216494845	99	0.159172587	0.188343605	0.15699954	1.149267462
M1501	1B	558913560	0.078998031	0.329896907	99	0.159172587	0.188339419	0.15699954	-1.292322351
M2651	2A	609023391	0.079094714	0.206185567	99	0.159172587	0.188320284	0.15699954	-1.38619251
M10721	5B	375463032	0.079094796	0.463917526	99	0.159172587	0.188320268	0.15699954	-1.915482387
M14496	7A	55362389	0.079104177	0.175257732	99	0.159172587	0.188318412	0.15699954	1.28810676
M2867	2A	435071770	0.079121859	0.360824742	99	0.159172587	0.188314916	0.15699954	3.429848547
M6719	3A	714455841	0.079176175	0.371134021	99	0.159172587	0.188304182	0.15699954	-1.235893387
M11005	5B	481080959	0.079195062	0.432989691	99	0.159172587	0.188300451	0.15699954	1.277304029
M6754	3A	464718567	0.079203776	0.391752577	99	0.159172587	0.18829873	0.15699954	-2.248647686
M4992	2B	90939783	0.079237189	0.154639175	99	0.159172587	0.188292133	0.15699954	1.649334971
M4856	2B	746141190	0.079392055	0.175257732	99	0.159172587	0.188261596	0.15699954	-1.642892563
M10888	5B	367689148	0.079553292	0.268041237	99	0.159172587	0.188229873	0.15699954	1.321390652
M3609	2B	46601701	0.079661449	0.443298969	99	0.159172587	0.188208632	0.15699954	2.077015411
M10227	5A	420625497	0.079673841	0.381443299	99	0.159172587	0.188206201	0.15699954	2.285259904
M14621	7A	115321592	0.079750493	0.463917526	99	0.159172587	0.188191169	0.15699954	1.813898722
M6770	3A	0	0.079862848	0.164948454	99	0.159172587	0.188169164	0.15699954	-1.54855079
M14409	7A	31106605	0.079951183	0.103092784	99	0.159172587	0.188151888	0.15699954	1.908413366
M858	1B	36034202	0.079992098	0.288659794	99	0.159172587	0.188143893	0.15699954	-1.64099499
M9945	5A	46628073	0.080130401	0.453608247	99	0.159172587	0.188116901	0.15699954	1.655259713
M11583	5B	586524432	0.080133901	0.381443299	99	0.159172587	0.188116218	0.15699954	2.733404751
M1262	1B	316600988	0.08019912	0.463917526	99	0.159172587	0.188103508	0.15699954	2.260065535
M6836	3A	33345150	0.080207351	0.051546392	99	0.159172587	0.188101905	0.15699954	2.175286511
M11175	5B	436768810	0.080220491	0.12371134	99	0.159172587	0.188099346	0.15699954	2.154243811
M5801	2D	729134384	0.080225834	0.329896907	99	0.159172587	0.188098305	0.15699954	2.426778462
M3932	2B	154602689	0.08035285	0.412371134	99	0.159172587	0.188073593	0.15699954	1.555223206
M1990	1D	2053505	0.080392861	0.340206186	99	0.159172587	0.188065818	0.15699954	1.171161223
M6131	3A	0	0.080466691	0.154639175	99	0.159172587	0.188051481	0.15699954	-1.909956757
M3126	2A	751096174	0.080568848	0.030927835	99	0.159172587	0.188031667	0.15699954	-2.682485535
M60	1A	150793813	0.080586927	0.288659794	99	0.159172587	0.188028163	0.15699954	-1.486838122
M1677	1B	599251551	0.080693869	0.298969072	99	0.159172587	0.188007456	0.15699954	1.274214902
M6760	3A	585937578	0.080745019	0.06185567	99	0.159172587	0.187997563	0.15699954	2.243099557
M3606	2B	163007189	0.080820781	0.463917526	99	0.159172587	0.187982921	0.15699954	-1.139673864
M5885	2D	604056456	0.080895466	0.226804124	99	0.159172587	0.187968502	0.15699954	-1.602359156
M12214	6A	13815254	0.080926104	0.278350515	99	0.159172587	0.187962592	0.15699954	1.88566406
M5515	2D	139037649	0.080983742	0.350515464	99	0.159172587	0.187951479	0.15699954	-3.938094405
M10078	5A	474478884	0.080987144	0.484536082	99	0.159172587	0.187950823	0.15699954	2.10825863
M1027	1B	206100463	0.081070626	0.319587629	99	0.159172587	0.187934744	0.15699954	-1.768381131
M6724	3A	715199344	0.081093542	0.443298969	99	0.159172587	0.187930333	0.15699954	-1.124884633
M5211	2B	116192482	0.081109611	0.391752577	99	0.159172587	0.187927241	0.15699954	-2.025024927
M7168	3B	12472891	0.081195487	0.474226804	99	0.159172587	0.187910728	0.15699954	1.676346832
M4405	2B	0	0.081245381	0.402061856	99	0.159172587	0.187901142	0.15699954	2.31900779
M4449	2B	616934904	0.081245381	0.402061856	99	0.159172587	0.187901142	0.15699954	2.31900779
M2768	2A	125458503	0.081277393	0.237113402	99	0.159172587	0.187894996	0.15699954	1.469955718
M14512	7A	56245466	0.081323053	0.412371134	99	0.159172587	0.187886233	0.15699954	-2.343997139
M13003	6B	17701756	0.081475859	0.381443299	99	0.159172587	0.187856948	0.15699954	-2.470784117
M8743	4A	536854630	0.081499739	0.391752577	99	0.159172587	0.187852376	0.15699954	1.779497025
M12955	6B	8781678	0.081505708	0.360824742	99	0.159172587	0.187851234	0.15699954	-3.256032108
M13036	6B	20743122	0.081609398	0.030927835	99	0.159172587	0.187831404	0.15699954	-3.442189687
M4708	2B	711319990	0.081636181	0.350515464	99	0.159172587	0.187826286	0.15699954	-3.997423632
M13471	6B	0	0.081636181	0.350515464	99	0.159172587	0.187826286	0.15699954	3.997423632
M12349	6A	30867948	0.081655148	0.371134021	99	0.159172587	0.187822663	0.15699954	2.191120755
M3177	2A	758417987	0.081678084	0.402061856	99	0.159172587	0.187818283	0.15699954	1.467113722
M11786	5B	686537919	0.081709052	0.195876289	99	0.159172587	0.187812372	0.15699954	-1.502831616
M13505	6B	643559602	0.081709899	0.051546392	99	0.159172587	0.18781221	0.15699954	-3.123061832
M14192	7A	13842196	0.081756563	0.360824742	99	0.159172587	0.187803307	0.15699954	-3.608868242
M13108	6B	24914373	0.081794468	0.175257732	99	0.159172587	0.187796079	0.15699954	-1.361852286
M12113	6A	0	0.081842009	0.474226804	99	0.159172587	0.187787019	0.15699954	-1.220233664
M15428	7B	539790379	0.081902826	0.030927835	99	0.159172587	0.187775437	0.15699954	-2.495197429
M13596	6B	47980535	0.081932849	0.371134021	99	0.159172587	0.187769723	0.15699954	-1.264551094
M5405	2D	24778175	0.082189251	0.402061856	99	0.159172587	0.187721018	0.15699954	1.431795745
M14437	7A	37098983	0.082252298	0.072164948	99	0.159172587	0.187709067	0.15699954	-2.053324539
M9920	5A	40170718	0.082371843	0.206185567	99	0.159172587	0.187686435	0.15699954	-1.248315033
M10715	5B	75319717	0.082405257	0.18556701	99	0.159172587	0.187680115	0.15699954	-1.412541569
M6023	3A	1286118	0.082409457	0.164948454	99	0.159172587	0.187679321	0.15699954	1.73310161
M1976	1D	4243757	0.082419172	0.402061856	99	0.159172587	0.187677484	0.15699954	1.478651686
M1738	1B	637527763	0.08248057	0.288659794	99	0.159172587	0.187665882	0.15699954	1.254399651
M381	1A	504702998	0.082580829	0.443298969	99	0.159172587	0.187646956	0.15699954	1.355690251
M7978	3B	762845618	0.082611439	0.030927835	99	0.159172587	0.187641182	0.15699954	-2.564000659
M9713	4B	660420109	0.082614874	0.391752577	99	0.159172587	0.187640535	0.15699954	-1.500771246
M13240	6B	0	0.082638831	0.082474227	99	0.159172587	0.187636018	0.15699954	2.239329425
M343	1A	490414155	0.082650133	0.402061856	99	0.159172587	0.187633888	0.15699954	2.024712
M13444	6B	590912644	0.082662111	0.12371134	99	0.159172587	0.18763163	0.15699954	-1.773231178
M7970	3B	95564668	0.082724657	0.453608247	99	0.159172587	0.187619849	0.15699954	1.13292953
M3237	2A	760509250	0.082736652	0.412371134	99	0.159172587	0.187617591	0.15699954	-1.634315112
M11985	5D	548463362	0.082797645	0.06185567	99	0.159172587	0.187606113	0.15699954	-2.530723447
M7411	3B	379344423	0.082963095	0.030927835	99	0.159172587	0.187575026	0.15699954	-3.41160636
M12084	6A	0	0.083068566	0.474226804	99	0.159172587	0.187555244	0.15699954	-1.19979425
M7264	3B	47202036	0.083075897	0.268041237	99	0.159172587	0.18755387	0.15699954	-1.425606061
M14542	7A	64739187	0.083143316	0.463917526	99	0.159172587	0.18754124	0.15699954	1.485387975
M794	1B	0	0.083176945	0.474226804	99	0.159172587	0.187534945	0.15699954	-1.318887533
M8603	4A	5349394	0.083219299	0.288659794	99	0.159172587	0.18752702	0.15699954	-1.600755318
M12074	6A	1852832	0.083244344	0.195876289	99	0.159172587	0.187522336	0.15699954	1.701096294
M1916	1B	676984396	0.083251294	0.175257732	99	0.159172587	0.187521036	0.15699954	1.344110879
M6432	3A	509564298	0.083253468	0.020618557	99	0.159172587	0.18752063	0.15699954	-3.128122553
M7982	3B	763454895	0.083253468	0.020618557	99	0.159172587	0.18752063	0.15699954	3.128122553
M2584	2A	70871621	0.083263941	0.154639175	99	0.159172587	0.187518672	0.15699954	-1.491002499
M2537	2A	0	0.083687593	0.463917526	99	0.159172587	0.187439692	0.15699954	-1.568239202
M791	1B	179842147	0.083781426	0.06185567	99	0.159172587	0.187422259	0.15699954	-2.255795783
M2617	2A	355706503	0.083849724	0.432989691	99	0.159172587	0.187409583	0.15699954	1.490529462
M674	1A	0	0.083875252	0.309278351	99	0.159172587	0.187404848	0.15699954	1.519794989
M6846	3A	329077007	0.083911285	0.329896907	99	0.159172587	0.187398167	0.15699954	1.199298801
M5858	2D	603508254	0.084087503	0.443298969	99	0.159172587	0.18736554	0.15699954	1.685207804
M10720	5B	328244838	0.084120868	0.309278351	99	0.159172587	0.187359371	0.15699954	-1.479312839
M15338	7B	382617987	0.084171997	0.360824742	99	0.159172587	0.187349923	0.15699954	-1.268325179
M11289	5B	635677372	0.084434938	0.195876289	99	0.159172587	0.187301433	0.15699954	1.151361877
M12650	6A	594520636	0.084455905	0.474226804	99	0.159172587	0.187297573	0.15699954	1.560469806
M7257	3B	38722483	0.084460326	0.381443299	99	0.159172587	0.187296759	0.15699954	-1.547776288
M3519	2B	0	0.084521753	0.134020619	99	0.159172587	0.187285459	0.15699954	-1.435618831
M5697	2D	612367311	0.084538588	0.175257732	99	0.159172587	0.187282364	0.15699954	-1.242663291
M1139	1B	57477371	0.084574349	0.030927835	99	0.159172587	0.18727579	0.15699954	-2.745017165
M2954	2A	689761057	0.084626417	0.329896907	99	0.159172587	0.187266225	0.15699954	1.336971791
M9347	4A	18775545	0.084637772	0.340206186	99	0.159172587	0.18726414	0.15699954	2.94406007
M7778	3B	711641981	0.084675273	0.474226804	99	0.159172587	0.187257256	0.15699954	-1.637114764
M8260	3D	0	0.084743336	0.360824742	99	0.159172587	0.18724477	0.15699954	-1.411299608
M12030	5D	561671357	0.084796332	0.06185567	99	0.159172587	0.187235056	0.15699954	-2.158643475
M3724	2B	149684945	0.084857864	0.06185567	99	0.159172587	0.187223786	0.15699954	-1.818457741
M6240	3A	465870969	0.084941274	0.329896907	99	0.159172587	0.187208522	0.15699954	2.28136292
M11999	5D	555036729	0.085032485	0.463917526	99	0.159172587	0.18719185	0.15699954	-1.657588692
M3940	2B	503351516	0.08503951	0.402061856	99	0.159172587	0.187190567	0.15699954	1.651372285
M8272	3D	0	0.085060598	0.340206186	99	0.159172587	0.187186715	0.15699954	-1.342867336
M3381	2A	585501135	0.085226034	0.371134021	99	0.159172587	0.187156537	0.15699954	1.850607956
M6519	3A	633055334	0.085226668	0.134020619	99	0.159172587	0.187156421	0.15699954	1.512808476
M1321	1B	0	0.085227248	0.134020619	99	0.159172587	0.187156316	0.15699954	1.819885677
M10468	5A	618274809	0.085531029	0.226804124	99	0.159172587	0.187101069	0.15699954	-1.029347877
M13704	6B	708228121	0.085589373	0.072164948	99	0.159172587	0.187090483	0.15699954	2.355260997
M4818	2B	606156145	0.085627782	0.340206186	99	0.159172587	0.187083519	0.15699954	1.428248521
M3896	2B	118063648	0.085634555	0.175257732	99	0.159172587	0.187082291	0.15699954	-1.374909797
M9782	4D	446124259	0.085706158	0.12371134	99	0.159172587	0.187069317	0.15699954	1.615194701
M534	1A	454769741	0.085750032	0.257731959	99	0.159172587	0.187061374	0.15699954	1.445189147
M6109	3A	0	0.085789299	0.24742268	99	0.159172587	0.187054269	0.15699954	-1.323658398
M3755	2B	392096989	0.085894671	0.432989691	99	0.159172587	0.187035219	0.15699954	-1.97506848
M2610	2A	699092314	0.08595434	0.082474227	99	0.159172587	0.187024443	0.15699954	1.548980202
M9838	5A	6179460	0.085967589	0.453608247	99	0.159172587	0.187022052	0.15699954	-1.76004475
M709	1B	3569552	0.08598081	0.453608247	99	0.159172587	0.187019665	0.15699954	1.816355846
M14987	7A	713260958	0.085988549	0.113402062	99	0.159172587	0.187018269	0.15699954	-1.607393849
M7335	3B	65705367	0.086010169	0.443298969	99	0.159172587	0.187014368	0.15699954	1.583771107
M1405	1B	354331707	0.086140961	0.329896907	99	0.159172587	0.186990793	0.15699954	1.161150023
M11728	5B	665685766	0.08618227	0.360824742	99	0.159172587	0.186983356	0.15699954	-1.621475418
M6402	3A	407747638	0.086226433	0.216494845	99	0.159172587	0.186975409	0.15699954	-1.436928096
M7922	3B	749485203	0.086230238	0.329896907	99	0.159172587	0.186974724	0.15699954	1.20215521
M513	1A	544430459	0.086248362	0.494845361	99	0.159172587	0.186971464	0.15699954	-1.336334601
M6636	3A	292579611	0.086286104	0.381443299	99	0.159172587	0.186964678	0.15699954	2.714427426
M3734	2B	462272407	0.08635025	0.360824742	99	0.159172587	0.186953152	0.15699954	-1.17941567
M9875	5A	22720330	0.086367652	0.371134021	99	0.159172587	0.186950027	0.15699954	-2.685334419
M9794	4D	403180673	0.086446699	0.278350515	99	0.159172587	0.186935839	0.15699954	1.444259789
M3871	2B	106962921	0.086573017	0.278350515	99	0.159172587	0.186913196	0.15699954	1.636493173
M14005	6D	287343107	0.086585884	0.144329897	99	0.159172587	0.186910892	0.15699954	-1.702025818
M10561	5B	7710121	0.086787318	0.453608247	99	0.159172587	0.186874866	0.15699954	-2.219876938
M10578	5B	16199701	0.086787318	0.453608247	99	0.159172587	0.186874866	0.15699954	-2.219876938
M10690	5B	63844582	0.086787318	0.453608247	99	0.159172587	0.186874866	0.15699954	-2.219876938
M10657	5B	8364049	0.086787318	0.453608247	99	0.159172587	0.186874866	0.15699954	2.219876938
M12575	6A	524836376	0.086905044	0.391752577	99	0.159172587	0.186853853	0.15699954	-2.211011002
M759	1B	13027114	0.086911426	0.381443299	99	0.159172587	0.186852715	0.15699954	-1.506219703
M5547	2D	403470553	0.08691451	0.432989691	99	0.159172587	0.186852165	0.15699954	-1.492215342
M3815	2B	105985751	0.087056862	0.391752577	99	0.159172587	0.186826802	0.15699954	-2.451853473
M2029	1D	10234393	0.087106911	0.463917526	99	0.159172587	0.186817896	0.15699954	-1.334774894
M6418	3A	512556910	0.087161432	0.12371134	99	0.159172587	0.1868082	0.15699954	1.893977508
M7250	3B	38671387	0.087208206	0.226804124	99	0.159172587	0.186799887	0.15699954	1.580036119
M11729	5B	669502971	0.087289337	0.216494845	99	0.159172587	0.18678548	0.15699954	-1.384482843
M13125	6B	51997445	0.087347449	0.474226804	99	0.159172587	0.186775169	0.15699954	-1.832619182
M7266	3B	47202036	0.087426171	0.422680412	99	0.159172587	0.186761214	0.15699954	-1.801984212
M4168	2B	162156739	0.087502263	0.371134021	99	0.159172587	0.186747738	0.15699954	-1.363134784
M10101	5A	468931981	0.087538496	0.463917526	99	0.159172587	0.186741326	0.15699954	-1.638677303
M6187	3A	312266867	0.087617008	0.432989691	99	0.159172587	0.186727442	0.15699954	1.862338538
M9200	4A	50748255	0.087638004	0.010309278	99	0.159172587	0.186723731	0.15699954	-3.799385713
M11295	5B	223737266	0.087697064	0.06185567	99	0.159172587	0.186713298	0.15699954	2.24339438
M13841	6B	0	0.08780083	0.443298969	99	0.159172587	0.186694987	0.15699954	1.229176154
M2814	2A	275909182	0.087802065	0.12371134	99	0.159172587	0.186694769	0.15699954	-1.689927287
M8264	3D	6023348	0.08785055	0.412371134	99	0.159172587	0.186686222	0.15699954	1.790719517
M4374	2B	446932626	0.088103364	0.494845361	99	0.159172587	0.186641736	0.15699954	-1.511290049
M4190	2B	704873966	0.088153102	0.463917526	99	0.159172587	0.186633001	0.15699954	1.605400343
M3243	2A	759767692	0.088165421	0.072164948	99	0.159172587	0.186630838	0.15699954	2.151886329
M6548	3A	649815141	0.088314015	0.360824742	99	0.159172587	0.186604777	0.15699954	-3.33928358
M13408	6B	512060987	0.08842762	0.402061856	99	0.159172587	0.186584885	0.15699954	0.999177233
M4189	2B	704873966	0.088721189	0.226804124	99	0.159172587	0.186533611	0.15699954	1.659983053
M3793	2B	96381383	0.088757123	0.164948454	99	0.159172587	0.186527348	0.15699954	-1.66298522
M14107	6D	463784578	0.088758556	0.463917526	99	0.159172587	0.186527099	0.15699954	-1.644733604
M13303	6B	471100656	0.08876509	0.463917526	99	0.159172587	0.18652596	0.15699954	-1.673885877
M2263	1D	472374775	0.088819293	0.443298969	99	0.159172587	0.186516519	0.15699954	-2.257921557
M5366	2D	12550757	0.088845504	0.082474227	99	0.159172587	0.186511956	0.15699954	1.812312299
M12595	6A	550966287	0.089095478	0.298969072	99	0.159172587	0.186468511	0.15699954	-1.649668643
M120	1A	21638580	0.089184974	0.278350515	99	0.159172587	0.186452989	0.15699954	-1.229692219
M10684	5B	0	0.089427392	0.350515464	99	0.159172587	0.186411032	0.15699954	3.042871503
M14473	7A	49648308	0.089427392	0.350515464	99	0.159172587	0.186411032	0.15699954	3.042871503
M14529	7A	62883363	0.089427392	0.350515464	99	0.159172587	0.186411032	0.15699954	3.042871503
M2535	2A	45084253	0.089427392	0.350515464	99	0.159172587	0.186411032	0.15699954	3.042871503
M10600	5B	15127220	0.089468043	0.113402062	99	0.159172587	0.186404008	0.15699954	-2.350413485
M14015	6D	306139692	0.089482925	0.391752577	99	0.159172587	0.186401438	0.15699954	-1.292476758
M276	1A	397669794	0.089569472	0.020618557	99	0.159172587	0.186386499	0.15699954	-2.856528404
M2207	1D	475499558	0.089617948	0.268041237	99	0.159172587	0.186378138	0.15699954	1.587912014
M9979	5A	438355093	0.089631342	0.288659794	99	0.159172587	0.186375829	0.15699954	-1.204019343
M629	1A	481552064	0.08976051	0.298969072	99	0.159172587	0.18635358	0.15699954	1.126721532
M6116	3A	15451588	0.089847638	0.494845361	99	0.159172587	0.186338592	0.15699954	-1.041935498
M14170	7A	11374457	0.089882596	0.164948454	99	0.159172587	0.186332584	0.15699954	1.820532089
M10009	5A	461913319	0.089895023	0.12371134	99	0.159172587	0.186330448	0.15699954	1.357524848
M3874	2B	116192482	0.089896868	0.484536082	99	0.159172587	0.186330131	0.15699954	-1.156277463
M865	1B	496978998	0.089950544	0.474226804	99	0.159172587	0.186320911	0.15699954	1.715572437
M13540	6B	657260591	0.089953388	0.381443299	99	0.159172587	0.186320423	0.15699954	2.554566255
M5689	2D	187627136	0.089972414	0.371134021	99	0.159172587	0.186317156	0.15699954	-2.65667635
M3928	2B	180555363	0.089981965	0.103092784	99	0.159172587	0.186315517	0.15699954	1.642685068
M8102	3B	805556027	0.090067636	0.350515464	99	0.159172587	0.186300819	0.15699954	1.218557787
M8225	3B	0	0.090372483	0.371134021	99	0.159172587	0.186248646	0.15699954	1.513880701
M4461	2B	548446843	0.090402373	0.350515464	99	0.159172587	0.186243541	0.15699954	-1.202797112
M2172	1D	433030711	0.090407133	0.494845361	99	0.159172587	0.186242728	0.15699954	-2.549272542
M6354	3A	297919087	0.09050678	0.494845361	99	0.159172587	0.186225723	0.15699954	-1.562883088
M6700	3A	505333325	0.090552118	0.402061856	99	0.159172587	0.186217993	0.15699954	1.338223977
M13819	6B	713463818	0.090598461	0.432989691	99	0.159172587	0.186210096	0.15699954	-1.039216598
M4837	2B	745683074	0.090611831	0.453608247	99	0.159172587	0.186207819	0.15699954	1.51283683
M6702	3A	712285937	0.090652841	0.319587629	99	0.159172587	0.186200835	0.15699954	-1.566968367
M1739	1B	460149819	0.090653298	0.226804124	99	0.159172587	0.186200757	0.15699954	1.379712301
M6661	3A	702539146	0.090702019	0.412371134	99	0.159172587	0.186192465	0.15699954	1.75761868
M9048	4A	654345599	0.090713557	0.463917526	99	0.159172587	0.186190502	0.15699954	-1.548706129
M10656	5B	47592205	0.090839383	0.12371134	99	0.159172587	0.186169113	0.15699954	-2.182695147
M10687	5B	69504666	0.090839383	0.12371134	99	0.159172587	0.186169113	0.15699954	-2.182695147
M10594	5B	19729352	0.090839383	0.12371134	99	0.159172587	0.186169113	0.15699954	2.182695147
M10693	5B	78260556	0.090839383	0.12371134	99	0.159172587	0.186169113	0.15699954	2.182695147
M8340	3D	37969599	0.090866637	0.092783505	99	0.159172587	0.186164485	0.15699954	-1.607491863
M7958	3B	761436458	0.090893988	0.371134021	99	0.159172587	0.186159841	0.15699954	1.54709898
M1794	1B	643950881	0.090899296	0.216494845	99	0.159172587	0.18615894	0.15699954	-1.456554555
M10541	5B	2625302	0.09091676	0.041237113	99	0.159172587	0.186155976	0.15699954	2.231780233
M8136	3B	303789579	0.091036193	0.24742268	99	0.159172587	0.186135723	0.15699954	-1.226546062
M12544	6A	112907129	0.091182393	0.06185567	99	0.159172587	0.186110971	0.15699954	-2.500354703
M8674	4A	232125986	0.091311182	0.340206186	99	0.159172587	0.186089203	0.15699954	-1.155826684
M6807	3A	732737562	0.091365664	0.422680412	99	0.159172587	0.186080004	0.15699954	-1.89750208
M14222	7A	8870463	0.091388267	0.371134021	99	0.159172587	0.18607619	0.15699954	3.356915079
M14229	7A	12099978	0.091388267	0.371134021	99	0.159172587	0.18607619	0.15699954	3.356915079
M14618	7A	116622717	0.091419226	0.463917526	99	0.159172587	0.186070967	0.15699954	-1.685694916
M1115	1B	574486838	0.091510607	0.226804124	99	0.159172587	0.186055562	0.15699954	-1.376372526
M2807	2A	377043313	0.091511946	0.474226804	99	0.159172587	0.186055337	0.15699954	1.587065476
M13872	6D	4373922	0.091697811	0.24742268	99	0.159172587	0.186024057	0.15699954	1.780903497
M6227	3A	23856007	0.091766104	0.329896907	99	0.159172587	0.186012581	0.15699954	-1.062052092
M751	1B	12605308	0.09178719	0.463917526	99	0.159172587	0.18600904	0.15699954	-1.820300657
M57	1A	362741398	0.091838852	0.381443299	99	0.159172587	0.186000367	0.15699954	1.814538922
M6792	3A	726286900	0.091957918	0.082474227	99	0.159172587	0.1859804	0.15699954	1.733714777
M7305	3B	537220619	0.092010105	0.371134021	99	0.159172587	0.185971657	0.15699954	-1.30997876
M5678	2D	547955524	0.092039285	0.134020619	99	0.159172587	0.185966771	0.15699954	-1.840922867
M8293	3D	17391691	0.092156756	0.350515464	99	0.159172587	0.185947119	0.15699954	1.551792938
M4496	2B	555576973	0.092345261	0.195876289	99	0.159172587	0.18591564	0.15699954	-1.250844628
M7506	3B	130253586	0.092539038	0.257731959	99	0.159172587	0.185883354	0.15699954	-1.377797616
M6520	3A	633055334	0.092539903	0.484536082	99	0.159172587	0.18588321	0.15699954	1.382869614
M9072	4A	689130935	0.092604907	0.020618557	99	0.159172587	0.185872397	0.15699954	3.416495598
M6130	3A	22234939	0.092699199	0.474226804	99	0.159172587	0.185856726	0.15699954	1.928296504
M5601	2D	665523602	0.092810211	0.402061856	99	0.159172587	0.185838299	0.15699954	-1.354455331
M11151	5B	519254488	0.092923016	0.144329897	99	0.159172587	0.1858196	0.15699954	-1.631696022
M5091	2B	172418924	0.092978767	0.319587629	99	0.159172587	0.185810367	0.15699954	-2.811305263
M11461	5B	0	0.093067192	0.288659794	99	0.159172587	0.185795736	0.15699954	1.166392865
M3825	2B	587422326	0.093088146	0.237113402	99	0.159172587	0.185792271	0.15699954	-1.223715694
M8945	4A	91210964	0.093094117	0.432989691	99	0.159172587	0.185791284	0.15699954	1.169978307
M817	1B	21249692	0.093166237	0.298969072	99	0.159172587	0.185779366	0.15699954	1.410795797
M6397	3A	473708936	0.093222859	0.484536082	99	0.159172587	0.185770017	0.15699954	1.322871462
M6916	3B	0	0.093252002	0.381443299	99	0.159172587	0.185765207	0.15699954	1.608276611
M2924	2A	691480240	0.093266436	0.144329897	99	0.159172587	0.185762825	0.15699954	-1.376112156
M11459	5B	546498743	0.093286107	0.144329897	99	0.159172587	0.18575958	0.15699954	-1.626426159
M13357	6B	113852468	0.093301493	0.463917526	99	0.159172587	0.185757042	0.15699954	-1.840499619
M1557	1B	564574859	0.093448691	0.422680412	99	0.159172587	0.185732788	0.15699954	-1.490097694
M11474	5B	549562653	0.093513075	0.360824742	99	0.159172587	0.185722193	0.15699954	-3.236010397
M2869	2A	553276886	0.09357654	0.381443299	99	0.159172587	0.185711756	0.15699954	-2.684843001
M12367	6A	19848156	0.093576753	0.340206186	99	0.159172587	0.185711722	0.15699954	-2.150239874
M7508	3B	47059876	0.093662306	0.422680412	99	0.159172587	0.185697665	0.15699954	1.103697047
M13790	6B	469537832	0.093681074	0.329896907	99	0.159172587	0.185694584	0.15699954	-2.49813907
M6068	3A	12479120	0.0937684	0.051546392	99	0.159172587	0.185680254	0.15699954	-2.395027772
M12938	6A	462540109	0.093795242	0.350515464	99	0.159172587	0.185675853	0.15699954	1.711442296
M15548	7B	25684258	0.093802183	0.422680412	99	0.159172587	0.185674715	0.15699954	2.152385737
M8634	4A	531682048	0.093848208	0.206185567	99	0.159172587	0.185667171	0.15699954	-1.494089062
M8226	3B	0	0.093851858	0.268041237	99	0.159172587	0.185666573	0.15699954	1.399810081
M1102	1B	30546167	0.09386628	0.381443299	99	0.159172587	0.18566421	0.15699954	2.548716606
M7540	3B	513663423	0.093892349	0.288659794	99	0.159172587	0.18565994	0.15699954	1.302635596
M12412	6A	39493610	0.094054549	0.237113402	99	0.159172587	0.185633402	0.15699954	1.358885216
M6787	3A	519467461	0.094068984	0.06185567	99	0.159172587	0.185631043	0.15699954	1.979643346
M13562	6B	322479776	0.094152763	0.474226804	99	0.159172587	0.185617358	0.15699954	-1.525380619
M7077	3B	20999249	0.094285336	0.257731959	99	0.159172587	0.18559573	0.15699954	1.236494105
M12242	6A	16198698	0.094340599	0.463917526	99	0.159172587	0.185586724	0.15699954	-1.241037793
M14312	7A	455466428	0.094396936	0.340206186	99	0.159172587	0.185577549	0.15699954	1.683155831
M10093	5A	473321191	0.09443803	0.422680412	99	0.159172587	0.185570861	0.15699954	-1.214305789
M5054	2B	0	0.094487336	0.474226804	99	0.159172587	0.18556284	0.15699954	-2.240870963
M13567	6B	572539293	0.094642516	0.340206186	99	0.159172587	0.185537626	0.15699954	-1.431329547
M7209	3B	130618089	0.094785317	0.474226804	99	0.159172587	0.185514464	0.15699954	1.633285067
M2439	2A	21812330	0.094904634	0.474226804	99	0.159172587	0.18549514	0.15699954	-2.369928945
M1720	1B	629678307	0.095140915	0.474226804	99	0.159172587	0.185456954	0.15699954	1.351707281
M6340	3A	459068976	0.095273046	0.237113402	99	0.159172587	0.185435645	0.15699954	-1.567250244
M7244	3B	0	0.095323468	0.453608247	99	0.159172587	0.185427522	0.15699954	1.11140202
M3555	2B	29045988	0.095340667	0.319587629	99	0.159172587	0.185424752	0.15699954	1.573859821
M5843	2D	571082311	0.09543543	0.154639175	99	0.159172587	0.185409502	0.15699954	1.662569584
M9500	4B	126026369	0.095672595	0.195876289	99	0.159172587	0.185371408	0.15699954	1.520167827
M7931	3B	750783796	0.095748638	0.113402062	99	0.159172587	0.185359216	0.15699954	1.470232665
M10131	5A	143838637	0.095807977	0.422680412	99	0.159172587	0.18534971	0.15699954	1.057082815
M11913	5D	341609030	0.09581918	0.360824742	99	0.159172587	0.185347916	0.15699954	-3.915096101
M5196	2B	788005120	0.09581918	0.360824742	99	0.159172587	0.185347916	0.15699954	-3.915096101
M14212	7A	10884688	0.09581918	0.360824742	99	0.159172587	0.185347916	0.15699954	3.915096101
M14515	7A	57742411	0.09581918	0.360824742	99	0.159172587	0.185347916	0.15699954	3.915096101
M15017	7A	713138041	0.09581918	0.360824742	99	0.159172587	0.185347916	0.15699954	3.915096101
M15019	7A	712493182	0.09581918	0.360824742	99	0.159172587	0.185347916	0.15699954	3.915096101
M5178	2B	0	0.09581918	0.360824742	99	0.159172587	0.185347916	0.15699954	3.915096101
M5212	2B	116192482	0.09581918	0.360824742	99	0.159172587	0.185347916	0.15699954	3.915096101
M6730	3A	0	0.09581918	0.360824742	99	0.159172587	0.185347916	0.15699954	3.915096101
M8197	3B	819744121	0.09581918	0.360824742	99	0.159172587	0.185347916	0.15699954	3.915096101
M10758	5B	429171723	0.095894216	0.103092784	99	0.159172587	0.185335905	0.15699954	-2.323247985
M3978	2B	174831753	0.095899641	0.092783505	99	0.159172587	0.185335037	0.15699954	-2.151193182
M11464	5B	243695786	0.095907802	0.216494845	99	0.159172587	0.185333732	0.15699954	1.345415909
M6712	3A	715352220	0.096010205	0.484536082	99	0.159172587	0.185317361	0.15699954	1.065469981
M4842	2B	601567299	0.096102354	0.226804124	99	0.159172587	0.185302645	0.15699954	-1.443874438
M3990	2B	126899677	0.096149995	0.12371134	99	0.159172587	0.185295043	0.15699954	1.656804242
M1998	1D	11496996	0.096255701	0.340206186	99	0.159172587	0.185278191	0.15699954	1.699716464
M1663	1B	606491204	0.096255798	0.041237113	99	0.159172587	0.185278176	0.15699954	3.096495025
M1298	1B	65947056	0.096270166	0.164948454	99	0.159172587	0.185275887	0.15699954	1.627877895
M14826	7A	644848734	0.09633025	0.144329897	99	0.159172587	0.185266319	0.15699954	-1.592802047
M9509	4B	481237158	0.096340375	0.175257732	99	0.159172587	0.185264707	0.15699954	1.355541359
M9850	5A	27470847	0.096510836	0.237113402	99	0.159172587	0.185237601	0.15699954	1.512381672
M4319	2B	507351907	0.096838378	0.226804124	99	0.159172587	0.185185666	0.15699954	-1.56644535
M13997	6D	134699294	0.096874602	0.494845361	99	0.159172587	0.185179934	0.15699954	1.593315686
M3074	2A	735763589	0.096905816	0.24742268	99	0.159172587	0.185174997	0.15699954	-1.522918472
M13198	6B	0	0.096943521	0.082474227	99	0.159172587	0.185169035	0.15699954	2.043421292
M8687	4A	478992616	0.09699683	0.329896907	99	0.159172587	0.185160611	0.15699954	-2.562914091
M2006	1D	495342360	0.097047462	0.309278351	99	0.159172587	0.185152615	0.15699954	1.546989121
M8265	3D	14857937	0.097058573	0.24742268	99	0.159172587	0.185150861	0.15699954	1.19277269
M12856	6A	452082827	0.097124878	0.329896907	99	0.159172587	0.185140397	0.15699954	1.154274699
M1213	1B	111837904	0.097127009	0.309278351	99	0.159172587	0.185140061	0.15699954	1.667121046
M713	1B	104669566	0.097227049	0.463917526	99	0.159172587	0.185124289	0.15699954	1.604179254
M5569	2D	472861352	0.097247728	0.268041237	99	0.159172587	0.185121031	0.15699954	1.609482166
M4337	2B	457674991	0.097256707	0.350515464	99	0.159172587	0.185119617	0.15699954	-1.164831821
M10185	5A	479325026	0.097322317	0.422680412	99	0.159172587	0.185109287	0.15699954	1.709868898
M525	1A	549851141	0.097369721	0.453608247	99	0.159172587	0.185101828	0.15699954	1.450659254
M1787	1B	608599570	0.097370181	0.041237113	99	0.159172587	0.185101755	0.15699954	-2.425845364
M1502	1B	558913560	0.097423475	0.402061856	99	0.159172587	0.185093374	0.15699954	1.302697197
M14416	7A	33761756	0.097515326	0.463917526	99	0.159172587	0.185078942	0.15699954	1.556019787
M13076	6B	40061097	0.097563862	0.484536082	99	0.159172587	0.185071321	0.15699954	1.537916924
M12436	6A	70821245	0.097587886	0.298969072	99	0.159172587	0.185067551	0.15699954	-1.620597073
M6138	3A	286518666	0.09778477	0.381443299	99	0.159172587	0.185036691	0.15699954	-1.427097934
M4347	2B	144566918	0.097829915	0.216494845	99	0.159172587	0.185029624	0.15699954	-1.811462774
M2372	2A	104531498	0.097832384	0.041237113	99	0.159172587	0.185029238	0.15699954	-2.572374878
M6242	3A	24744356	0.097832384	0.041237113	99	0.159172587	0.185029238	0.15699954	-2.572374878
M7887	3B	750359764	0.097832384	0.041237113	99	0.159172587	0.185029238	0.15699954	2.572374878
M2157	1D	521259456	0.09788487	0.24742268	99	0.159172587	0.185021027	0.15699954	-2.072422466
M3910	2B	976743	0.09793534	0.494845361	99	0.159172587	0.185013136	0.15699954	1.306781698
M12491	6A	440255570	0.097983339	0.092783505	99	0.159172587	0.185005636	0.15699954	-1.877815963
M3898	2B	137802366	0.098145587	0.164948454	99	0.159172587	0.184980314	0.15699954	-1.594210916
M358	1A	497201654	0.098368291	0.257731959	99	0.159172587	0.184945631	0.15699954	2.310695175
M8082	3B	793011311	0.098511531	0.340206186	99	0.159172587	0.18492337	0.15699954	-2.13674178
M13488	6B	631137282	0.098512015	0.113402062	99	0.159172587	0.184923294	0.15699954	-2.057956561
M1752	1B	634501736	0.098518047	0.072164948	99	0.159172587	0.184922358	0.15699954	-1.750220563
M9986	5A	72230055	0.098587265	0.206185567	99	0.159172587	0.184911614	0.15699954	1.381036154
M1848	1B	664017254	0.098590384	0.463917526	99	0.159172587	0.18491113	0.15699954	1.786341054
M8263	3D	6023348	0.09867661	0.24742268	99	0.159172587	0.184897758	0.15699954	1.723707016
M1495	1B	563066992	0.098784359	0.463917526	99	0.159172587	0.184881068	0.15699954	1.219342663
M14637	7A	122751126	0.098801373	0.391752577	99	0.159172587	0.184878434	0.15699954	-2.18647062
M12403	6A	28011074	0.098806368	0.340206186	99	0.159172587	0.184877661	0.15699954	-0.961666889
M4244	2B	216955924	0.098888831	0.195876289	99	0.159172587	0.184864903	0.15699954	-1.354869201
M15334	7B	254067422	0.09899996	0.154639175	99	0.159172587	0.18484773	0.15699954	-1.517940331
M14910	7A	693692703	0.099086347	0.051546392	99	0.159172587	0.184834395	0.15699954	2.101617658
M4326	2B	289305639	0.099098714	0.164948454	99	0.159172587	0.184832487	0.15699954	1.373307405
M4626	2B	599925082	0.099139417	0.371134021	99	0.159172587	0.184826209	0.15699954	1.151378468
M8200	3B	610544393	0.099139869	0.360824742	99	0.159172587	0.18482614	0.15699954	-1.514771598
M4958	2B	761846794	0.099242495	0.195876289	99	0.159172587	0.184810324	0.15699954	-1.560899443
M1631	1B	587501291	0.09924633	0.360824742	99	0.159172587	0.184809734	0.15699954	1.360072079
M3559	2B	0	0.09925177	0.360824742	99	0.159172587	0.184808896	0.15699954	-1.309236277
M2502	2A	36404881	0.09928826	0.257731959	99	0.159172587	0.184803277	0.15699954	-1.647069422
M11521	5B	563781408	0.099338848	0.484536082	99	0.159172587	0.184795492	0.15699954	-1.533082731
M10814	5B	412452755	0.099374818	0.030927835	99	0.159172587	0.184789959	0.15699954	-3.769199019
M14292	7A	16302848	0.099374818	0.030927835	99	0.159172587	0.184789959	0.15699954	-3.769199019
M7765	3B	728080758	0.099374818	0.030927835	99	0.159172587	0.184789959	0.15699954	-3.769199019
M10086	5A	470186523	0.099374818	0.030927835	99	0.159172587	0.184789959	0.15699954	3.769199019
M13508	6B	502906219	0.099374818	0.030927835	99	0.159172587	0.184789959	0.15699954	3.769199019
M14211	7A	10884688	0.099374818	0.030927835	99	0.159172587	0.184789959	0.15699954	3.769199019
M11483	5B	162710933	0.099384725	0.412371134	99	0.159172587	0.184788435	0.15699954	1.964581566
M7190	3B	692937796	0.099441589	0.072164948	99	0.159172587	0.184779694	0.15699954	2.01055654
M7039	3B	17613543	0.099478511	0.206185567	99	0.159172587	0.184774021	0.15699954	1.473045143
M5080	2B	765297108	0.099484857	0.474226804	99	0.159172587	0.184773046	0.15699954	-1.059066999
M1446	1B	406770303	0.0995993	0.06185567	99	0.159172587	0.184755478	0.157048951	1.718543825
M14640	7A	131108912	0.099631348	0.391752577	99	0.159172587	0.184750563	0.157048951	-2.208648975
M11627	5B	596950005	0.099775084	0.463917526	99	0.159172587	0.184728538	0.157078507	1.399913919
M14570	7A	27346450	0.099945507	0.381443299	99	0.159172587	0.18470247	0.157078507	-2.146636376
M6854	3A	745517190	0.10005303	0.412371134	99	0.159172587	0.184686048	0.157078507	1.544270065
M14655	7A	126116658	0.100074169	0.257731959	99	0.159172587	0.184682822	0.157078507	1.39639534
M3908	2B	976743	0.100238801	0.051546392	99	0.159172587	0.184657722	0.157078507	-2.560931741
M8763	4A	595543015	0.100243664	0.06185567	99	0.159172587	0.184656981	0.157078507	-1.703342226
M9159	4A	708532867	0.100258786	0.381443299	99	0.159172587	0.184654678	0.157078507	-3.541905139
M11620	5B	589463513	0.100366498	0.288659794	99	0.159172587	0.184638284	0.157078507	1.075414553
M2530	2A	15966155	0.100508593	0.278350515	99	0.159172587	0.184616688	0.157078507	1.445039718
M11497	5B	802727205	0.100517512	0.226804124	99	0.159172587	0.184615333	0.157078507	1.374163067
M12975	6B	2439812	0.100691632	0.453608247	99	0.159172587	0.184588918	0.157078507	-0.99330169
M13278	6B	515290485	0.100698503	0.154639175	99	0.159172587	0.184587877	0.157078507	1.474628218
M2645	2A	95654544	0.100784106	0.412371134	99	0.159172587	0.18457491	0.157078507	1.774369851
M13565	6B	438806491	0.100809727	0.432989691	99	0.159172587	0.184571031	0.157078507	1.123317798
M9909	5A	38118455	0.100812553	0.257731959	99	0.159172587	0.184570603	0.157078507	1.407956659
M1351	1B	378833974	0.100824482	0.391752577	99	0.159172587	0.184568798	0.157078507	1.014205587
M537	1A	469979060	0.100928991	0.360824742	99	0.159172587	0.184552991	0.157078507	-1.004521046
M10282	5A	550570228	0.100989779	0.134020619	99	0.159172587	0.184543805	0.157078507	1.731354455
M9901	5A	104616943	0.101014559	0.113402062	99	0.159172587	0.184540062	0.157078507	-1.489840193
M10875	5B	524047080	0.101018342	0.474226804	99	0.159172587	0.18453949	0.157078507	1.570007451
M12278	6A	398955808	0.101113674	0.041237113	99	0.159172587	0.184525101	0.157078507	2.416284194
M36	1A	2185082	0.101254861	0.360824742	99	0.159172587	0.184503818	0.157078507	2.245170188
M8020	3B	765843802	0.101315959	0.329896907	99	0.159172587	0.184494619	0.157078507	-1.899511075
M15151	7A	711324304	0.101361958	0.051546392	99	0.159172587	0.184487696	0.157078507	-2.529903139
M5811	2D	588737228	0.10140373	0.412371134	99	0.159172587	0.184481413	0.157078507	1.454182692
M14675	7A	191173951	0.101441758	0.237113402	99	0.159172587	0.184475696	0.157078507	1.494147779
M4429	2B	632518271	0.101489034	0.082474227	99	0.159172587	0.184468591	0.157078507	-1.596606707
M11491	5B	589677807	0.101583125	0.391752577	99	0.159172587	0.184454462	0.157078507	1.145467976
M1841	1B	666942323	0.101622901	0.484536082	99	0.159172587	0.184448494	0.157078507	-1.403229037
M6705	3A	711688019	0.10163077	0.319587629	99	0.159172587	0.184447313	0.157078507	-1.483894079
M8204	3B	317056611	0.101643383	0.340206186	99	0.159172587	0.184445421	0.157078507	1.328936403
M9074	4A	641838580	0.101644365	0.494845361	99	0.159172587	0.184445274	0.157078507	-1.754998106
M6120	3A	25417579	0.101832198	0.484536082	99	0.159172587	0.184417131	0.157078507	-1.309740664
M12399	6A	38379225	0.101846138	0.350515464	99	0.159172587	0.184415045	0.157078507	1.607077165
M10904	5B	438017042	0.101892932	0.154639175	99	0.159172587	0.184408043	0.157078507	1.491723334
M13906	6D	10735296	0.101899798	0.463917526	99	0.159172587	0.184407017	0.157078507	1.035619972
M510	1A	451630549	0.101906307	0.257731959	99	0.159172587	0.184406043	0.157078507	1.110652083
M15483	7B	0	0.101958783	0.041237113	99	0.159172587	0.184398197	0.157078507	2.512117406
M9049	4A	655668912	0.102138337	0.195876289	99	0.159172587	0.184371385	0.157078507	-1.538102698
M9832	5A	6609542	0.102157975	0.402061856	99	0.159172587	0.184368456	0.157078507	1.224975637
M5839	2D	571920602	0.102171845	0.474226804	99	0.159172587	0.184366388	0.157078507	-1.534805765
M13989	6D	149883876	0.102178757	0.463917526	99	0.159172587	0.184365357	0.157078507	1.936464202
M13601	6B	79255016	0.102184575	0.309278351	99	0.159172587	0.184364489	0.157078507	1.999655719
M10491	5A	662956259	0.102253979	0.164948454	99	0.159172587	0.184354145	0.157078507	-1.815284162
M2829	2A	579584012	0.102339669	0.319587629	99	0.159172587	0.184341384	0.157078507	-1.201850235
M12147	6A	8803926	0.102351259	0.278350515	99	0.159172587	0.184339659	0.157078507	1.616264684
M5779	2D	586846415	0.102376344	0.494845361	99	0.159172587	0.184335926	0.157078507	1.059150637
M6005	2D	642133932	0.102414956	0.350515464	99	0.159172587	0.184330182	0.157078507	-1.49976243
M5831	2D	578880228	0.102620565	0.443298969	99	0.159172587	0.184299635	0.157147022	1.592076775
M1309	1B	462799871	0.102653701	0.103092784	99	0.159172587	0.184294719	0.157147022	-2.03643366
M10781	5B	410537310	0.102653747	0.453608247	99	0.159172587	0.184294712	0.157147022	-1.928552319
M9941	5A	52738363	0.102741077	0.484536082	99	0.159172587	0.184281763	0.157147022	-1.238856999
M1621	1B	589768769	0.10274776	0.463917526	99	0.159172587	0.184280773	0.157147022	1.743046617
M14468	7A	60679438	0.102846538	0.278350515	99	0.159172587	0.184266142	0.15719826	1.823250462
M9156	4A	353560638	0.103025617	0.051546392	99	0.159172587	0.184239657	0.15719826	-3.431392435
M9715	4D	705550759	0.103131778	0.381443299	99	0.159172587	0.184223981	0.15719826	1.437281863
M12819	6A	604539151	0.103341967	0.237113402	99	0.159172587	0.184192996	0.15719826	1.644038646
M10344	5A	568799936	0.103653281	0.051546392	99	0.159172587	0.184147232	0.15719826	2.353114225
M12761	6A	595578856	0.103664692	0.494845361	99	0.159172587	0.184145558	0.15719826	1.488968663
M5964	2D	57217895	0.103746442	0.154639175	99	0.159172587	0.184133567	0.15719826	1.26816455
M3783	2B	91146822	0.103756037	0.257731959	99	0.159172587	0.184132161	0.15719826	1.343292951
M2087	1D	92257056	0.103786047	0.381443299	99	0.159172587	0.184127762	0.15719826	-1.502350977
M341	1A	0	0.103789746	0.340206186	99	0.159172587	0.18412722	0.15719826	2.841018276
M10651	5B	48311248	0.103928533	0.474226804	99	0.159172587	0.184106897	0.15719826	-1.706257934
M9862	5A	14849690	0.103993612	0.494845361	99	0.159172587	0.184097378	0.15719826	1.833746288
M11106	5B	511603033	0.103996931	0.371134021	99	0.159172587	0.184096893	0.15719826	-1.516493347
M13181	6B	93428436	0.104220464	0.453608247	99	0.159172587	0.184064247	0.15719826	0.965643893
M72	1A	10132748	0.104246007	0.154639175	99	0.159172587	0.184060522	0.15719826	1.785194659
M11454	5B	651409879	0.104253853	0.134020619	99	0.159172587	0.184059378	0.15719826	-1.403563584
M11294	5B	7763543	0.104269581	0.18556701	99	0.159172587	0.184057085	0.15719826	-1.309933666
M5942	2D	625109798	0.104276289	0.432989691	99	0.159172587	0.184056107	0.15719826	1.161032991
M4446	2B	626087891	0.104306078	0.06185567	99	0.159172587	0.184051765	0.15719826	2.037084563
M14253	7A	0	0.104341367	0.422680412	99	0.159172587	0.184046623	0.15719826	1.420164602
M500	1A	540414573	0.104362272	0.381443299	99	0.159172587	0.184043578	0.15719826	1.618275183
M15372	7B	426526640	0.104363006	0.298969072	99	0.159172587	0.184043471	0.15719826	-1.130102971
M5374	2D	13599129	0.104374509	0.12371134	99	0.159172587	0.184041796	0.15719826	-1.630645543
M10269	5A	434483981	0.104462796	0.463917526	99	0.159172587	0.184028945	0.15719826	1.52843041
M13062	6B	15357875	0.104558594	0.134020619	99	0.159172587	0.184015014	0.15719826	1.64894475
M692	1A	491632757	0.104559204	0.432989691	99	0.159172587	0.184014925	0.15719826	-1.154273006
M9298	4A	718920407	0.104567579	0.257731959	99	0.159172587	0.184013708	0.15719826	-1.514231671
M14820	7A	636900029	0.104590668	0.18556701	99	0.159172587	0.184010353	0.15719826	-1.430909248
M1745	1B	461485520	0.104680265	0.443298969	99	0.159172587	0.183997342	0.15719826	-1.407743867
M7569	3B	0	0.104759691	0.484536082	99	0.159172587	0.183985817	0.15719826	1.473199473
M7912	3B	289065738	0.104765587	0.237113402	99	0.159172587	0.183984962	0.15719826	1.390838536
M7069	3B	15205844	0.104770811	0.134020619	99	0.159172587	0.183984205	0.15719826	1.214931366
M9103	4A	694752965	0.10479884	0.371134021	99	0.159172587	0.183980141	0.15719826	-2.857540012
M9733	4D	16502547	0.104969546	0.288659794	99	0.159172587	0.183955416	0.157214896	1.079381567
M14906	7A	693636591	0.105028426	0.12371134	99	0.159172587	0.183946898	0.157214896	1.832239739
M2615	2A	0	0.105128115	0.453608247	99	0.159172587	0.183932488	0.157214896	-1.418164377
M3451	2B	14601769	0.105138428	0.432989691	99	0.159172587	0.183930999	0.157214896	1.154679772
M8586	4A	716765921	0.105164637	0.319587629	99	0.159172587	0.183927213	0.157214896	1.512328317
M11103	5B	423757647	0.105166036	0.371134021	99	0.159172587	0.183927011	0.157214896	2.002382358
M13039	6B	0	0.105213489	0.072164948	99	0.159172587	0.18392016	0.157214896	1.516089802
M14041	6D	415027508	0.105282262	0.164948454	99	0.159172587	0.183910238	0.157231505	1.48595398
M6507	3A	614763369	0.10538503	0.443298969	99	0.159172587	0.183895423	0.157288585	1.758816301
M5304	2B	638876490	0.105435839	0.144329897	99	0.159172587	0.183888105	0.157288585	-1.461776142
M727	1B	3164636	0.10551273	0.494845361	99	0.159172587	0.183877038	0.157317231	1.703471972
M1297	1B	65947056	0.105876209	0.432989691	99	0.159172587	0.18382484	0.157757752	1.522693228
M12190	6A	9461899	0.105996515	0.360824742	99	0.159172587	0.183807608	0.157757752	-1.534661876
M10614	5B	25812761	0.106023981	0.113402062	99	0.159172587	0.183803677	0.157757752	-1.771993701
M3632	2B	286756395	0.10604348	0.463917526	99	0.159172587	0.183800887	0.157757752	-0.993334425
M5679	2D	0	0.106149071	0.474226804	99	0.159172587	0.183785787	0.157757752	-1.732051073
M5808	2D	601970973	0.106310815	0.072164948	99	0.159172587	0.183762691	0.157757752	-2.584787665
M7283	3B	48788274	0.106328793	0.237113402	99	0.159172587	0.183760126	0.157757752	1.491001156
M8189	3B	0	0.106329644	0.164948454	99	0.159172587	0.183760005	0.157757752	1.460466487
M4933	2B	746932893	0.106386271	0.422680412	99	0.159172587	0.183751929	0.157757752	1.079859319
M11187	5B	438389368	0.106401678	0.381443299	99	0.159172587	0.183749733	0.157757752	1.097387948
M5655	2D	142549111	0.106501761	0.340206186	99	0.159172587	0.183735474	0.157757752	1.580461908
M14121	6D	471828189	0.106510508	0.484536082	99	0.159172587	0.183734229	0.157757752	-1.111437237
M7450	3B	242490336	0.106646932	0.237113402	99	0.159172587	0.183714819	0.157757752	1.168409623
M2237	1D	638502351	0.106722239	0.391752577	99	0.159172587	0.183704116	0.157757752	1.719163897
M4028	2B	392038009	0.106810393	0.103092784	99	0.159172587	0.183691599	0.157757752	1.67889438
M9761	4D	347481014	0.106832755	0.226804124	99	0.159172587	0.183688425	0.157757752	-1.445778638
M11131	5B	328983718	0.106840014	0.175257732	99	0.159172587	0.183687395	0.157757752	-1.139017963
M913	1B	309086631	0.106849493	0.463917526	99	0.159172587	0.18368605	0.157757752	-1.529132767
M15537	7B	638162408	0.106996895	0.175257732	99	0.159172587	0.183665153	0.157889899	-1.482293685
M9198	4A	713898148	0.107073825	0.278350515	99	0.159172587	0.18365426	0.157917968	-1.286815813
M11807	5B	691196509	0.107160767	0.144329897	99	0.159172587	0.18364196	0.157960763	-1.2443395
M10877	5B	540056844	0.107234999	0.402061856	99	0.159172587	0.183631466	0.157984788	1.135814233
M12034	5D	561671414	0.107396841	0.443298969	99	0.159172587	0.183608616	0.158137789	1.234522904
M11933	5D	437761268	0.107492386	0.412371134	99	0.159172587	0.183595144	0.158157135	1.168015792
M8106	3B	0	0.107525973	0.092783505	99	0.159172587	0.183590412	0.158157135	1.504325052
M7427	3B	303590858	0.107752561	0.18556701	99	0.159172587	0.183558527	0.158300687	-1.115720841
M1717	1B	629844981	0.10782842	0.381443299	99	0.159172587	0.18354787	0.158300687	-2.246955945
M9866	5A	18572611	0.107928986	0.051546392	99	0.159172587	0.183533754	0.158300687	-2.246094738
M9881	5A	109928851	0.107928986	0.051546392	99	0.159172587	0.183533754	0.158300687	-2.246094738
M9872	5A	26928049	0.107928986	0.051546392	99	0.159172587	0.183533754	0.158300687	2.246094738
M12723	6A	584947190	0.107971866	0.237113402	99	0.159172587	0.183527739	0.158300687	1.437621792
M34	1A	3982825	0.108048396	0.082474227	99	0.159172587	0.183517011	0.158327768	1.53771456
M8828	4A	138660384	0.108233448	0.12371134	99	0.159172587	0.183491107	0.15844586	-1.770156379
M5739	2D	607144225	0.108245191	0.371134021	99	0.159172587	0.183489464	0.15844586	-1.101588484
M14532	7A	69893107	0.108674002	0.402061856	99	0.159172587	0.183429633	0.158787156	-1.693814691
M14535	7A	65600063	0.108674002	0.402061856	99	0.159172587	0.183429633	0.158787156	-1.693814691
M3384	2A	585501135	0.108678138	0.268041237	99	0.159172587	0.183429057	0.158787156	-0.988861996
M640	1A	580453133	0.108711266	0.319587629	99	0.159172587	0.183424446	0.158787156	-1.078431598
M13404	6B	159517660	0.108790801	0.329896907	99	0.159172587	0.183413382	0.158818263	1.404897355
M9873	5A	27509864	0.109038623	0.381443299	99	0.159172587	0.183378965	0.159009799	2.254849783
M5622	2D	110910233	0.109218234	0.113402062	99	0.159172587	0.183354076	0.159028929	1.46027798
M5018	2B	766527144	0.109233236	0.175257732	99	0.159172587	0.183351999	0.159028929	1.465529205
M6946	3B	685069835	0.109268149	0.360824742	99	0.159172587	0.183347167	0.159028929	1.359171887
M8035	3B	768723678	0.109477847	0.164948454	99	0.159172587	0.183318181	0.159028929	1.380432563
M4087	2B	94344351	0.109658058	0.226804124	99	0.159172587	0.183293321	0.159028929	1.517721909
M5782	2D	611125588	0.10972021	0.360824742	99	0.159172587	0.183284757	0.159028929	1.229227269
M10417	5A	585223448	0.109729675	0.371134021	99	0.159172587	0.183283453	0.159028929	-1.635736501
M10840	5B	454180549	0.109785804	0.030927835	99	0.159172587	0.183275725	0.159028929	-2.071921164
M9690	4B	667731312	0.109804219	0.474226804	99	0.159172587	0.183273191	0.159028929	-1.510590513
M15018	7A	713138041	0.109900329	0.06185567	99	0.159172587	0.18325997	0.159028929	2.507019525
M1757	1B	0	0.109904299	0.072164948	99	0.159172587	0.183259425	0.159028929	-1.530082005
M5660	2D	620224144	0.109922201	0.309278351	99	0.159172587	0.183256964	0.159028929	-1.090100608
M9221	4A	720689979	0.109928744	0.278350515	99	0.159172587	0.183256064	0.159028929	-1.312931436
M3565	2B	0	0.109994369	0.494845361	99	0.159172587	0.183247047	0.159028929	-1.065005873
M6133	3A	430569956	0.11004312	0.350515464	99	0.159172587	0.183240353	0.159028929	1.201929578
M14786	7A	89214940	0.110180449	0.402061856	99	0.159172587	0.183221512	0.15903715	2.554229213
M939	1B	171130928	0.110198299	0.226804124	99	0.159172587	0.183219065	0.15903715	1.41175566
M14917	7A	700180481	0.110227252	0.030927835	99	0.159172587	0.183215097	0.15903715	-2.616680992
M5233	2B	794002225	0.110333535	0.319587629	99	0.159172587	0.183200541	0.15903715	1.605035597
M13600	6B	675620421	0.1103552	0.134020619	99	0.159172587	0.183197576	0.15903715	-1.323219
M9319	4A	336207656	0.110513867	0.443298969	99	0.159172587	0.183175879	0.15903715	1.62397822
M12886	6A	467198500	0.110572138	0.432989691	99	0.159172587	0.183167919	0.15903715	1.530585951
M3481	2B	12913977	0.110614582	0.443298969	99	0.159172587	0.183162125	0.15903715	1.491274979
M11313	5B	422210751	0.110623011	0.329896907	99	0.159172587	0.183160974	0.15903715	-1.916746037
M12407	6A	244663257	0.110710619	0.24742268	99	0.159172587	0.183149023	0.15903715	-1.194238096
M9260	4A	724783161	0.110793876	0.422680412	99	0.159172587	0.183137674	0.15903715	1.115666148
M236	1A	341122401	0.111082106	0.340206186	99	0.159172587	0.18309846	0.15903715	1.4231379
M8650	4A	303362512	0.111093022	0.319587629	99	0.159172587	0.183096977	0.15903715	-1.512589513
M3567	2B	31608031	0.111146476	0.288659794	99	0.159172587	0.183089718	0.15903715	-1.447733425
M7805	3B	673217142	0.111214973	0.030927835	99	0.159172587	0.183080422	0.15903715	2.786213217
M1172	1B	32481951	0.111520431	0.051546392	99	0.159172587	0.183039043	0.15903715	-2.210505266
M13340	6B	239326408	0.11157648	0.412371134	99	0.159172587	0.183031464	0.15903715	-1.73965728
M13112	6B	637279875	0.111760777	0.154639175	99	0.159172587	0.183006574	0.15903715	1.313593578
M8584	4A	716765921	0.111786122	0.288659794	99	0.159172587	0.183003155	0.15903715	1.17590311
M13374	6B	159138986	0.111819373	0.237113402	99	0.159172587	0.18299867	0.15903715	-1.726123462
M13920	6D	12435844	0.111829475	0.309278351	99	0.159172587	0.182997308	0.15903715	-1.22503777
M14547	7A	69893167	0.111848165	0.432989691	99	0.159172587	0.182994788	0.15903715	1.074624563
M2128	1D	413406127	0.111868026	0.092783505	99	0.159172587	0.182992111	0.15903715	-1.509328376
M12764	6A	391337338	0.111890681	0.175257732	99	0.159172587	0.182989057	0.15903715	-1.372218833
M5941	2D	625109798	0.111961928	0.340206186	99	0.159172587	0.18297946	0.15903715	1.404045579
M13820	6B	713463818	0.111979957	0.288659794	99	0.159172587	0.182977032	0.15903715	1.070528455
M9161	4A	708083352	0.112244524	0.474226804	99	0.159172587	0.182941459	0.15903715	-1.685914413
M6800	3A	729897788	0.112251178	0.443298969	99	0.159172587	0.182940565	0.15903715	1.70088082
M12041	6A	0	0.112310417	0.463917526	99	0.159172587	0.182932614	0.15903715	-1.296384381
M4075	2B	236592763	0.112378391	0.463917526	99	0.159172587	0.182923495	0.15903715	1.878164955
M4425	2B	544170551	0.112390246	0.278350515	99	0.159172587	0.182921905	0.15903715	-1.186465507
M7486	3B	495521725	0.112567046	0.329896907	99	0.159172587	0.18289822	0.15903715	-3.037165932
M14337	7A	21081193	0.112784954	0.371134021	99	0.159172587	0.182869084	0.15903715	2.338292606
M11813	5B	548989698	0.112785603	0.06185567	99	0.159172587	0.182868998	0.15903715	2.101855028
M4803	2B	127668612	0.112802638	0.18556701	99	0.159172587	0.182866723	0.15903715	-1.146006359
M8974	4A	681683099	0.112812586	0.24742268	99	0.159172587	0.182865394	0.15903715	1.167422432
M5822	2D	606705458	0.112914534	0.391752577	99	0.159172587	0.182851789	0.15903715	-1.346483128
M6344	3A	142889812	0.112917022	0.484536082	99	0.159172587	0.182851457	0.15903715	-1.421673961
M6311	3A	69361313	0.112917057	0.371134021	99	0.159172587	0.182851452	0.15903715	1.337854384
M4566	2B	692625689	0.112945391	0.494845361	99	0.159172587	0.182847673	0.15903715	-1.43858227
M5339	2B	22348080	0.112960521	0.288659794	99	0.159172587	0.182845656	0.15903715	-1.582856067
M6756	3A	720367772	0.112990496	0.360824742	99	0.159172587	0.18284166	0.15903715	-1.54099009
M10777	5B	398715853	0.113065562	0.402061856	99	0.159172587	0.182831658	0.15903715	-1.288197693
M4585	2B	710353117	0.113086278	0.371134021	99	0.159172587	0.182828899	0.15903715	1.561045492
M5873	2D	601406100	0.113349373	0.144329897	99	0.159172587	0.18279391	0.15903715	1.578047608
M11822	5B	34137545	0.113406926	0.484536082	99	0.159172587	0.182786268	0.15903715	1.466470866
M4794	2B	724734789	0.113423087	0.360824742	99	0.159172587	0.182784123	0.15903715	-1.744228652
M8221	3B	404215451	0.113575254	0.381443299	99	0.159172587	0.182763943	0.15903715	-1.428484037
M4928	2B	619961495	0.113670684	0.381443299	99	0.159172587	0.182751302	0.15903715	-0.987789627
M1788	1B	608599570	0.113912787	0.309278351	99	0.159172587	0.182719287	0.15903715	2.37302366
M8063	3B	748377632	0.113970618	0.432989691	99	0.159172587	0.182711651	0.15903715	-1.7775446
M9717	4D	3356525	0.114069942	0.371134021	99	0.159172587	0.182698546	0.15903715	-1.511458249
M4093	2B	290674909	0.114396931	0.494845361	99	0.159172587	0.182655492	0.15903715	-1.30835291
M9967	5A	283796742	0.114403112	0.288659794	99	0.159172587	0.18265468	0.15903715	-1.010097151
M1040	1B	186525506	0.114418632	0.412371134	99	0.159172587	0.18265264	0.15903715	2.291164956
M950	1B	711939962	0.114472659	0.443298969	99	0.159172587	0.182645541	0.15903715	1.743685438
M10369	5A	568264305	0.114540743	0.432989691	99	0.159172587	0.182636601	0.15903715	-1.473789854
M11902	5D	175947785	0.114542017	0.278350515	99	0.159172587	0.182636434	0.15903715	-1.491930837
M210	1A	135164309	0.114644372	0.484536082	99	0.159172587	0.182623004	0.15903715	-1.079797675
M14534	7A	68211926	0.11464613	0.144329897	99	0.159172587	0.182622774	0.15903715	-1.212999378
M10820	5B	408228341	0.114662817	0.443298969	99	0.159172587	0.182620586	0.15903715	-1.12947562
M10360	5A	567120979	0.114664393	0.030927835	99	0.159172587	0.182620379	0.15903715	-2.878499544
M10063	5A	469896498	0.114695292	0.463917526	99	0.159172587	0.182616328	0.15903715	-1.140635149
M10512	5A	679723058	0.114722999	0.474226804	99	0.159172587	0.182612697	0.15903715	-1.548511999
M10757	5B	429171723	0.114731072	0.051546392	99	0.159172587	0.182611639	0.15903715	1.779265947
M12281	6A	40410979	0.114807245	0.412371134	99	0.159172587	0.182601662	0.15903715	2.544795214
M1138	1B	220883994	0.114816705	0.257731959	99	0.159172587	0.182600424	0.15903715	1.323191282
M15097	7A	720912669	0.114917427	0.402061856	99	0.159172587	0.182587244	0.15903715	-1.96517687
M11545	5B	461255726	0.114966499	0.268041237	99	0.159172587	0.182580828	0.15903715	-1.231715818
M7594	3B	22083131	0.114967506	0.319587629	99	0.159172587	0.182580696	0.15903715	-1.324827711
M7303	3B	538369580	0.115005587	0.06185567	99	0.159172587	0.182575719	0.15903715	1.805657005
M7476	3B	304279362	0.115021258	0.051546392	99	0.159172587	0.182573671	0.15903715	-1.75065351
M2904	2A	502932671	0.115132088	0.402061856	99	0.159172587	0.182559198	0.15903715	-1.161576232
M11362	5B	180679040	0.115143432	0.206185567	99	0.159172587	0.182557718	0.15903715	-1.262159172
M14000	6D	488198477	0.115211561	0.432989691	99	0.159172587	0.18254883	0.15903715	1.133151378
M8064	3B	748377632	0.115236449	0.103092784	99	0.159172587	0.182545585	0.15903715	-1.750364214
M7296	3B	67787098	0.115399862	0.412371134	99	0.159172587	0.182524295	0.15903715	1.372454059
M938	1B	0	0.115432462	0.278350515	99	0.159172587	0.182520052	0.15903715	1.392568398
M9959	5A	54941693	0.115617654	0.453608247	99	0.159172587	0.182495974	0.15903715	-1.184307688
M1395	1B	394705218	0.115629489	0.494845361	99	0.159172587	0.182494437	0.15903715	1.271113585
M2838	2A	137932218	0.115715799	0.237113402	99	0.159172587	0.182483231	0.15903715	1.107815739
M509	1A	451630549	0.115799329	0.412371134	99	0.159172587	0.182472395	0.15903715	-1.206722571
M4934	2B	746932893	0.115822064	0.412371134	99	0.159172587	0.182469447	0.15903715	-1.087427503
M1978	1D	4243757	0.115824693	0.381443299	99	0.159172587	0.182469107	0.15903715	1.48515519
M12212	6A	14386702	0.115880703	0.474226804	99	0.159172587	0.182461847	0.15903715	-1.704191383
M10258	5A	545129801	0.115933777	0.051546392	99	0.159172587	0.182454972	0.15903715	2.535761526
M4786	2B	734672774	0.115934804	0.381443299	99	0.159172587	0.182454839	0.15903715	-1.039973298
M13155	6B	0	0.115994526	0.350515464	99	0.159172587	0.182447107	0.15903715	-1.291383184
M10190	5A	503430449	0.116004487	0.237113402	99	0.159172587	0.182445818	0.15903715	1.302126724
M12694	6A	611545509	0.116030792	0.494845361	99	0.159172587	0.182442414	0.15903715	-1.624820441
M11219	5B	628455006	0.116085772	0.226804124	99	0.159172587	0.182435303	0.15903715	1.469690049
M5559	2D	632239916	0.116118096	0.12371134	99	0.159172587	0.182431124	0.15903715	1.345931631
M8205	3B	743193869	0.116144022	0.340206186	99	0.159172587	0.182427772	0.15903715	1.420854795
M8884	4A	629489184	0.116177061	0.360824742	99	0.159172587	0.182423503	0.15903715	-1.244083775
M3807	2B	157603272	0.116210057	0.268041237	99	0.159172587	0.182419241	0.15903715	1.439555161
M1940	1B	588683192	0.116223716	0.402061856	99	0.159172587	0.182417477	0.15903715	-1.547401251
M5356	2B	791958920	0.116418021	0.103092784	99	0.159172587	0.182392407	0.15903715	-2.050691239
M7323	3B	44296856	0.11643527	0.360824742	99	0.159172587	0.182390184	0.15903715	1.347460209
M12931	6A	0	0.11668047	0.154639175	99	0.159172587	0.182358621	0.15903715	-1.21082227
M6039	3A	0	0.116687363	0.041237113	99	0.159172587	0.182357734	0.15903715	2.635903225
M8302	3D	18727134	0.116727337	0.309278351	99	0.159172587	0.182352596	0.15903715	-1.450769735
M11038	5B	0	0.116761701	0.164948454	99	0.159172587	0.182348181	0.15903715	1.417205327
M7598	3B	562272656	0.116775131	0.051546392	99	0.159172587	0.182346455	0.15903715	-2.324461863
M14472	7A	263797478	0.116832151	0.24742268	99	0.159172587	0.182339133	0.15903715	-1.413653457
M7196	3B	0	0.116834211	0.216494845	99	0.159172587	0.182338868	0.15903715	-1.436115971
M15014	7A	704330351	0.116894547	0.113402062	99	0.159172587	0.182331124	0.15903715	-1.732157669
M2155	1D	431046013	0.116896571	0.288659794	99	0.159172587	0.182330864	0.15903715	-1.353506325
M2291	1D	586317908	0.116901882	0.484536082	99	0.159172587	0.182330183	0.15903715	1.485378096
M12188	6A	10011324	0.116922691	0.082474227	99	0.159172587	0.182327513	0.15903715	2.54564292
M9451	4B	13088435	0.117018734	0.298969072	99	0.159172587	0.182315199	0.15903715	1.424772117
M13276	6B	507595411	0.117027871	0.298969072	99	0.159172587	0.182314028	0.15903715	-1.382102348
M14476	7A	49592914	0.117029523	0.309278351	99	0.159172587	0.182313816	0.15903715	1.169322363
M2754	2A	413620700	0.117115374	0.175257732	99	0.159172587	0.18230282	0.15903715	-2.575310517
M11361	5B	180679040	0.117147248	0.298969072	99	0.159172587	0.182298739	0.15903715	1.899740053
M12135	6A	5480626	0.117192624	0.484536082	99	0.159172587	0.182292932	0.15903715	-1.424038407
M737	1B	0	0.117338517	0.12371134	99	0.159172587	0.182274279	0.15903715	1.626990408
M5649	2D	744783890	0.11733874	0.144329897	99	0.159172587	0.182274251	0.15903715	-1.495529515
M15317	7B	162339083	0.117514159	0.432989691	99	0.159172587	0.182251857	0.159189608	-2.038114103
M10477	5A	613546871	0.117567976	0.402061856	99	0.159172587	0.182244995	0.159189608	1.057837725
M7402	3B	592199044	0.117663758	0.12371134	99	0.159172587	0.182232789	0.159210629	1.157580536
M8090	3B	795540049	0.117762781	0.443298969	99	0.159172587	0.182220183	0.159210629	1.582844625
M13954	6D	95594839	0.117802614	0.381443299	99	0.159172587	0.182215115	0.159210629	-1.520252112
M3635	2B	504867107	0.117817033	0.360824742	99	0.159172587	0.182213281	0.159210629	2.79701478
M6251	3A	25944173	0.118026235	0.391752577	99	0.159172587	0.182186701	0.159256698	1.621738437
M14587	7A	69504600	0.118052625	0.402061856	99	0.159172587	0.182183352	0.159256698	-1.392101426
M12630	6A	570488216	0.118073333	0.340206186	99	0.159172587	0.182180724	0.159256698	-2.659247874
M10609	5B	0	0.118133692	0.494845361	99	0.159172587	0.182173068	0.159256698	-1.68275058
M1844	1B	578815386	0.118143125	0.144329897	99	0.159172587	0.182171872	0.159256698	-1.460826344
M11414	5B	233925191	0.118235879	0.484536082	99	0.159172587	0.182160117	0.159291217	0.859064175
M357	1A	497201654	0.118285557	0.113402062	99	0.159172587	0.182153826	0.159291217	-1.505076672
M8619	4A	107154792	0.118561824	0.412371134	99	0.159172587	0.182118891	0.159584449	1.490168016
M239	1A	232787828	0.118717438	0.371134021	99	0.159172587	0.182099254	0.15961264	1.099801448
M14595	7A	94404127	0.119020212	0.257731959	99	0.159172587	0.182061129	0.15961264	1.152203602
M10981	5B	476791459	0.119098673	0.030927835	99	0.159172587	0.182051267	0.15961264	2.539754064
M7546	3B	522161250	0.119110222	0.381443299	99	0.159172587	0.182049816	0.15961264	1.079514775
M5394	2D	15857433	0.119144337	0.082474227	99	0.159172587	0.182045531	0.15961264	1.628263188
M4796	2B	732056365	0.119168357	0.06185567	99	0.159172587	0.182042514	0.15961264	1.703314169
M874	1B	2431679	0.119359926	0.432989691	99	0.159172587	0.182018482	0.15961264	-1.336585218
M13473	6B	326519235	0.119396916	0.175257732	99	0.159172587	0.182013846	0.15961264	-1.767500544
M6062	3A	0	0.119490485	0.494845361	99	0.159172587	0.182002128	0.15961264	0.892440724
M7300	3B	19380506	0.119524524	0.24742268	99	0.159172587	0.181997868	0.15961264	1.367318558
M8609	4A	140700686	0.119570081	0.443298969	99	0.159172587	0.181992168	0.15961264	1.468876188
M10430	5A	595425815	0.119587516	0.041237113	99	0.159172587	0.181989987	0.15961264	-2.669337676
M10406	5A	580934990	0.119587516	0.041237113	99	0.159172587	0.181989987	0.15961264	2.669337676
M1849	1B	478032180	0.119634342	0.443298969	99	0.159172587	0.181984132	0.15961264	1.548664136
M14449	7A	37081907	0.119638624	0.206185567	99	0.159172587	0.181983597	0.15961264	-1.274566219
M5756	2D	587370416	0.119648693	0.309278351	99	0.159172587	0.181982338	0.15961264	1.380261779
M2331	2A	441309055	0.119674638	0.443298969	99	0.159172587	0.181979095	0.15961264	-1.785884747
M14953	7A	701528373	0.119744429	0.494845361	99	0.159172587	0.181970377	0.15961264	-1.74348039
M14798	7A	626324494	0.119786608	0.381443299	99	0.159172587	0.18196511	0.15961264	-1.245860933
M889	1B	630581864	0.119941282	0.402061856	99	0.159172587	0.181945815	0.15961264	2.28810441
M1456	1B	485555813	0.120030584	0.278350515	99	0.159172587	0.181934688	0.15961264	-1.532768721
M345	1A	486815863	0.120207377	0.278350515	99	0.159172587	0.181912687	0.15961264	-2.730854495
M9678	4B	16804898	0.120217137	0.309278351	99	0.159172587	0.181911473	0.15961264	1.13734782
M3694	2B	68579934	0.120256043	0.453608247	99	0.159172587	0.181906637	0.15961264	1.06875409
M3782	2B	59124498	0.120330148	0.391752577	99	0.159172587	0.18189743	0.15961264	1.477062041
M7878	3B	586524432	0.120330927	0.041237113	99	0.159172587	0.181897333	0.15961264	-2.831813808
M4152	2B	95129435	0.120441193	0.381443299	99	0.159172587	0.181883645	0.15961264	2.005561166
M8261	3D	6060550	0.120444116	0.350515464	99	0.159172587	0.181883282	0.15961264	-1.407679279
M8255	3D	7574572	0.120467568	0.371134021	99	0.159172587	0.181880373	0.15961264	-1.246653778
M6406	3A	541482839	0.120484255	0.360824742	99	0.159172587	0.181878303	0.15961264	-1.508835266
M9047	4A	654345599	0.120495874	0.463917526	99	0.159172587	0.181876862	0.15961264	1.387143503
M661	1A	6070342	0.120500621	0.206185567	99	0.159172587	0.181876273	0.15961264	-1.300828335
M5819	2D	606705458	0.120514274	0.391752577	99	0.159172587	0.18187458	0.15961264	1.015233496
M10173	5A	494876959	0.120741477	0.24742268	99	0.159172587	0.18184644	0.159835926	1.634828216
M14611	7A	106411744	0.120816553	0.030927835	99	0.159172587	0.181837154	0.159857709	2.445383266
M12799	6A	599927110	0.121098453	0.309278351	99	0.159172587	0.181802346	0.15992789	1.238220374
M7065	3B	15124529	0.121105861	0.371134021	99	0.159172587	0.181801433	0.15992789	-1.137649255
M9494	4B	307274600	0.121148389	0.18556701	99	0.159172587	0.18179619	0.15992789	-1.374458789
M2567	2A	59120189	0.121153554	0.402061856	99	0.159172587	0.181795553	0.15992789	-1.056153932
M13516	6B	643863927	0.121359191	0.041237113	99	0.159172587	0.181770232	0.15992789	2.78258828
M2945	2A	691905828	0.121396325	0.360824742	99	0.159172587	0.181765665	0.15992789	1.387249286
M13536	6B	653183662	0.121396332	0.494845361	99	0.159172587	0.181765664	0.15992789	-1.029714959
M7482	3B	415050293	0.121396536	0.474226804	99	0.159172587	0.181765639	0.15992789	1.439634337
M5817	2D	606164081	0.121397408	0.463917526	99	0.159172587	0.181765532	0.15992789	-1.565586819
M12229	6A	15647789	0.121719718	0.494845361	99	0.159172587	0.181725955	0.160178896	1.648347476
M13439	6B	568869850	0.121767381	0.360824742	99	0.159172587	0.181720113	0.160178896	1.082528378
M8	1A	0	0.121937309	0.164948454	99	0.159172587	0.181699304	0.160178896	1.363517885
M3145	2A	755740514	0.121948041	0.391752577	99	0.159172587	0.181697991	0.160178896	1.416793115
M13727	6B	708271328	0.1219607	0.319587629	99	0.159172587	0.181696442	0.160178896	1.221603156
M5897	2D	608405941	0.121990383	0.391752577	99	0.159172587	0.181692811	0.160178896	1.212749362
M8480	3D	577418701	0.121999108	0.494845361	99	0.159172587	0.181691744	0.160178896	0.965264529
M1693	1B	628810608	0.122102828	0.381443299	99	0.159172587	0.181679066	0.160237926	-2.143108331
M6812	3A	600135047	0.122188671	0.113402062	99	0.159172587	0.181668583	0.160273452	-1.622717235
M6051	3A	143037183	0.122249777	0.206185567	99	0.159172587	0.181661125	0.160276511	1.460358334
M14743	7A	577687730	0.122745856	0.381443299	99	0.159172587	0.181600737	0.160849567	-1.290388132
M13939	6D	18528639	0.123020958	0.463917526	99	0.159172587	0.181567367	0.160877902	-1.463588474
M1702	1B	453549548	0.123057732	0.453608247	99	0.159172587	0.181562913	0.160877902	-1.08897755
M9981	5A	59566378	0.12311127	0.474226804	99	0.159172587	0.181556431	0.160877902	1.014712254
M3912	2B	63622881	0.12317675	0.12371134	99	0.159172587	0.181548507	0.160877902	-1.508476442
M10199	5A	0	0.123178805	0.360824742	99	0.159172587	0.181548258	0.160877902	1.902292976
M3690	2B	69047995	0.123220582	0.494845361	99	0.159172587	0.181543205	0.160877902	1.123783578
M6768	3A	489299704	0.123232942	0.092783505	99	0.159172587	0.181541711	0.160877902	-1.790356069
M6477	3A	568024952	0.123239434	0.175257732	99	0.159172587	0.181540926	0.160877902	1.221122106
M11310	5B	4902436	0.123381146	0.24742268	99	0.159172587	0.181523803	0.160921748	1.137454393
M1160	1B	480841623	0.123391043	0.041237113	99	0.159172587	0.181522608	0.160921748	2.270153954
M2382	2A	19836679	0.123642358	0.041237113	99	0.159172587	0.1814923	0.160933472	-2.377803029
M4020	2B	678547100	0.123649	0.453608247	99	0.159172587	0.1814915	0.160933472	1.282490619
M11968	5D	531606683	0.12372986	0.412371134	99	0.159172587	0.181481763	0.160933472	1.510260572
M725	1B	3164636	0.12391305	0.195876289	99	0.159172587	0.181459732	0.160933472	-1.484407312
M7964	3B	748458996	0.123914371	0.24742268	99	0.159172587	0.181459573	0.160933472	-1.182293259
M7697	3B	669426645	0.123917816	0.422680412	99	0.159172587	0.181459159	0.160933472	-1.106071405
M6026	3A	7314381	0.123986494	0.237113402	99	0.159172587	0.18145091	0.160933472	1.378590344
M1827	1B	659387123	0.124108342	0.432989691	99	0.159172587	0.181436286	0.160933472	-1.699939518
M10116	5A	357980231	0.124123155	0.494845361	99	0.159172587	0.181434509	0.160933472	1.185535803
M4217	2B	34735773	0.12423725	0.216494845	99	0.159172587	0.181420832	0.160933472	1.132896458
M5908	2D	755037267	0.124239302	0.154639175	99	0.159172587	0.181420586	0.160933472	1.435668282
M8827	4A	138660384	0.124361747	0.484536082	99	0.159172587	0.181405924	0.160933472	-1.459878195
M4542	2B	673051085	0.124382372	0.371134021	99	0.159172587	0.181403456	0.160933472	2.178736932
M8922	4A	651777951	0.124405038	0.195876289	99	0.159172587	0.181400744	0.160933472	1.275820323
M7453	3B	429463062	0.124443756	0.402061856	99	0.159172587	0.181396113	0.160933472	1.491688809
M7425	3B	237976322	0.124504305	0.082474227	99	0.159172587	0.181388875	0.160933472	-1.574152543
M14040	6D	421558768	0.124548229	0.154639175	99	0.159172587	0.181383626	0.160933472	-1.480470008
M2245	1D	463949567	0.124591344	0.494845361	99	0.159172587	0.181378476	0.160933472	1.358150133
[truncated: 13,601 more rows]
