# Supplementary material for: Genome-wide association study of drought tolerance and biomass allocation in wheat
Source: PLoS One. 2019 Dec 4;14(12):e0225383. doi: 10.1371/journal.pone.0225383 (PMC6892492; doi:10.1371/journal.pone.0225383)
Supplement: S7 Table — (CSV) [file pone.0225383.s007.csv]

SNP	Chromosome	Position	P.value	maf	nobs	Rsquare.of.Model.without.SNP	Rsquare.of.Model.with.SNP	FDR_Adjusted_P-values	effect
M1566	1B	592833254	0.000821064	0.371134021	99	0.042733767	0.168847705	0.030252234	0.034369795
M5066	2B	595286130	0.000835724	0.443298969	99	0.042733767	0.168454227	0.045447631	-0.051633401
M7197	3B	35473244	0.000888056	0.154639175	99	0.042733767	0.16710548	0.043393551	-0.049299745
M7548	3B	498344378	0.00094079	0.030927835	99	0.042733767	0.165826906	0.050388128	-0.080144873
M7187	3B	209287998	0.001204806	0.484536082	99	0.042733767	0.160370976	0.042474493	0.048255596
M2994	2A	710105092	0.001391808	0.453608247	99	0.042733767	0.157208599	0.03538133	-0.040196999
M7271	3B	478901478	0.001863662	0.391752577	99	0.042733767	0.150856098	0.028572837	0.032461818
M8905	4A	54759330	0.001874153	0.24742268	99	0.042733767	0.150734565	0.037609216	0.042728117
M7209	3B	130618089	0.001886832	0.474226804	99	0.042733767	0.150588621	0.041961541	0.047672827
M4737	2B	682744936	0.001917486	0.216494845	99	0.042733767	0.150239918	0.031116108	0.035351248
M5065	2B	595286130	0.001930748	0.226804124	99	0.042733767	0.150090834	0.044638206	-0.050713807
M15396	7B	536555149	0.001937304	0.164948454	99	0.042733767	0.150017535	0.041310084	0.046932702
M7484	3B	349954850	0.002109125	0.360824742	99	0.042733767	0.148182684	0.074050879	0.084129769
M7760	3B	703333367	0.002309009	0.164948454	99	0.042733767	0.146233514	0.035665288	0.040519606
M854	1B	11179602	0.0023177	0.412371134	99	0.042733767	0.146152767	0.032827926	-0.037296058
M15407	7B	508801043	0.002543326	0.494845361	99	0.042733767	0.144159633	0.041367124	0.046997505
M13668	6B	462690299	0.0027912	0.195876289	99	0.042733767	0.142170876	0.032649126	0.037092922
M8098	3B	702728099	0.002895072	0.164948454	99	0.042733767	0.141391317	0.033111104	-0.037617778
M5048	2B	521686423	0.002970581	0.24742268	99	0.042733767	0.140842603	0.035858344	0.040738939
M11366	5B	196255936	0.003088347	0.072164948	99	0.042733767	0.140015022	0.048113884	-0.054662551
M1119	1B	39854453	0.003151844	0.432989691	99	0.042733767	0.139582268	0.039190777	-0.044524941
M15005	7A	83638613	0.003184009	0.453608247	99	0.042733767	0.139366493	0.050732449	-0.057637523
M7213	3B	37643831	0.003265152	0.041237113	99	0.042733767	0.138832038	0.066449372	-0.075493639
M1361	1B	691739942	0.003448344	0.371134021	99	0.042733767	0.137674393	0.067457912	0.07663945
M10411	5A	575237635	0.003642058	0.371134021	99	0.042733767	0.136517667	0.028439857	0.032310738
M14840	7A	669027223	0.003719101	0.103092784	99	0.042733767	0.13607526	0.038876632	0.044168039
M4757	2B	0	0.003776208	0.360824742	99	0.042733767	0.135753425	0.028442198	-0.032313398
M7328	3B	59889573	0.004095972	0.195876289	99	0.042733767	0.134039806	0.041518243	-0.047169193
M2293	1D	586317908	0.004152855	0.494845361	99	0.042733767	0.133749566	0.025592074	-0.029075351
M7518	3B	426296060	0.004160887	0.103092784	99	0.042733767	0.133708912	0.037339781	-0.04242201
M15000	7A	722383511	0.004166589	0.144329897	99	0.042733767	0.133680105	0.044119559	-0.050124568
M7656	3B	593933727	0.004195283	0.226804124	99	0.042733767	0.133535753	0.03735694	-0.042441505
M8912	4A	32202337	0.004437854	0.051546392	99	0.042733767	0.132354898	0.04489147	0.051001542
M7257	3B	38722483	0.0047816	0.381443299	99	0.042733767	0.13079155	0.03320844	-0.037728362
M15559	7B	215030611	0.00504634	0.06185567	99	0.042733767	0.129665133	0.053053632	0.060274637
M5638	2D	0	0.005053676	0.494845361	99	0.042733767	0.129634802	0.032971648	0.037459342
M4940	2B	617449665	0.005259208	0.144329897	99	0.042733767	0.12880309	0.035958465	-0.040852687
M8093	3B	803512428	0.005387293	0.443298969	99	0.042733767	0.128301696	0.038494801	-0.043734238
M277	1A	376476439	0.005504091	0.041237113	99	0.042733767	0.127855174	0.052491259	-0.059635721
M4608	2B	0	0.005686166	0.360824742	99	0.042733767	0.127178379	0.02712134	0.030812761
M6936	3B	453510124	0.00583471	0.474226804	99	0.042733767	0.126642715	0.033711369	-0.038299744
M13932	6D	486917435	0.005867941	0.381443299	99	0.042733767	0.126524822	0.038297145	-0.043509679
M13890	6D	6268088	0.005925135	0.412371134	99	0.042733767	0.126323534	0.024766313	0.028137197
M15308	7B	329791974	0.005990072	0.134020619	99	0.042733767	0.12609743	0.039781808	0.045196417
M7527	3B	410300351	0.006001658	0.371134021	99	0.042733767	0.12605736	0.061737152	-0.07014005
M10598	5B	20628549	0.006208685	0.164948454	99	0.042733767	0.125354572	0.037772925	-0.042914109
M1504	1B	559332514	0.006224679	0.257731959	99	0.042733767	0.125301296	0.032630845	0.037072153
M5983	2D	646478908	0.006419082	0.154639175	99	0.042733767	0.124664902	0.037860548	0.043013658
M12107	6A	586829111	0.006429974	0.381443299	99	0.042733767	0.124629842	0.053949177	-0.061292072
M11533	5B	558422737	0.006623489	0.175257732	99	0.042733767	0.124017038	0.033385877	-0.03792995
M11998	5D	553338175	0.006774803	0.360824742	99	0.042733767	0.123550723	0.024213864	-0.027509556
M3695	2B	69066012	0.006787288	0.278350515	99	0.042733767	0.123512734	0.02941651	-0.033420322
M4740	2B	728198487	0.006899534	0.12371134	99	0.042733767	0.123174415	0.039754302	0.045165167
M13667	6B	462690299	0.00691507	0.484536082	99	0.042733767	0.123128039	0.031958241	0.036308002
M13123	6B	51760224	0.007147865	0.381443299	99	0.042733767	0.12244586	0.052219743	0.059327249
M2912	2A	676994096	0.007160741	0.340206186	99	0.042733767	0.122408806	0.038958157	0.04426066
M3667	2B	64954602	0.007264965	0.206185567	99	0.042733767	0.12211141	0.033801357	-0.03840198
M6244	3A	11980146	0.007288706	0.103092784	99	0.042733767	0.122044288	0.041345404	0.04697283
M7569	3B	0	0.007370386	0.484536082	99	0.042733767	0.121815088	0.031621192	0.035925078
M1802	1B	653681729	0.007421543	0.18556701	99	0.042733767	0.12167288	0.032638898	0.037081302
M8721	4A	36222671	0.007461427	0.484536082	99	0.042733767	0.121562715	0.032868456	0.037342104
M6138	3A	286518666	0.007715992	0.381443299	99	0.042733767	0.120873725	0.030409513	-0.03454848
M4625	2B	599925082	0.007793033	0.453608247	99	0.042733767	0.120669874	0.036324683	-0.04126875
M2202	1D	9927002	0.007930246	0.134020619	99	0.042733767	0.120311959	0.034233008	0.038892382
M7221	3B	40531210	0.008063652	0.288659794	99	0.042733767	0.11997011	0.025646881	0.029137617
M7542	3B	492105153	0.00815511	0.175257732	99	0.042733767	0.119739144	0.032281809	0.03667561
M5056	2B	0	0.00828521	0.298969072	99	0.042733767	0.119415203	0.029649837	-0.033685407
M8044	3B	228195974	0.008329312	0.340206186	99	0.042733767	0.119306594	0.090882474	0.103252274
M12053	6A	172236575	0.008354987	0.360824742	99	0.042733767	0.11924364	0.025189452	-0.028617929
M6357	3A	358500939	0.008448962	0.340206186	99	0.042733767	0.119014931	0.028624481	-0.032520492
M7516	3B	74352754	0.008461428	0.164948454	99	0.042733767	0.118984792	0.035248762	-0.040046388
M1888	1B	669783975	0.008538929	0.175257732	99	0.042733767	0.118798448	0.03016808	0.034274186
M13933	6D	85711724	0.00857166	0.360824742	99	0.042733767	0.118720279	0.034416518	0.03910087
M7487	3B	518153058	0.008585549	0.402061856	99	0.042733767	0.118687202	0.039723862	-0.045130583
M9868	5A	19540756	0.008638066	0.103092784	99	0.042733767	0.118562637	0.036350942	-0.041298583
M7168	3B	12472891	0.008696521	0.474226804	99	0.042733767	0.118424914	0.034367533	0.039045217
M13432	6B	229522361	0.00871316	0.494845361	99	0.042733767	0.118385889	0.025142608	0.028564709
M8302	3D	18727134	0.008786045	0.309278351	99	0.042733767	0.118215854	0.031369257	-0.035638853
M4177	2B	694912132	0.008803685	0.154639175	99	0.042733767	0.118174922	0.032229601	0.036616296
M6535	3A	646854667	0.008844318	0.484536082	99	0.042733767	0.118080963	0.031685533	0.035998176
M3008	2A	683749636	0.008894796	0.381443299	99	0.042733767	0.117964863	0.022094516	-0.025101749
M14046	6D	625779148	0.009066059	0.463917526	99	0.042733767	0.117576022	0.035430148	0.040252461
M14330	7A	16886742	0.009106839	0.360824742	99	0.042733767	0.117484563	0.056169584	0.063814694
M14676	7A	191173951	0.009176034	0.381443299	99	0.042733767	0.117330352	0.027796551	0.031579873
M11914	5D	341609030	0.009246492	0.391752577	99	0.042733767	0.117174566	0.043799838	0.04976133
M3692	2B	68579934	0.009280297	0.24742268	99	0.042733767	0.117100263	0.033692595	-0.038278415
M211	1A	293607657	0.009320187	0.402061856	99	0.042733767	0.117012947	0.033071057	0.037572281
M7504	3B	414366969	0.00938837	0.082474227	99	0.042733767	0.116864598	0.039959348	-0.045398121
M7559	3B	479991691	0.0095417	0.268041237	99	0.042733767	0.116535062	0.027967173	0.031773719
M12101	6A	11577996	0.009643172	0.371134021	99	0.042733767	0.116320006	0.052757209	0.059937868
M2275	1D	676009151	0.009645751	0.154639175	99	0.042733767	0.116314571	0.033589508	-0.038161297
M8615	4A	125790560	0.009682179	0.432989691	99	0.042733767	0.116237964	0.022479543	-0.025539181
M6028	3A	192145005	0.0097261	0.463917526	99	0.042733767	0.116145999	0.036330363	0.041275203
M4742	2B	730086784	0.00979974	0.195876289	99	0.042733767	0.115992776	0.026509368	-0.030117496
M4755	2B	727221588	0.009847869	0.463917526	99	0.042733767	0.115893281	0.0364455	0.04140601
M13699	6B	275312917	0.010021865	0.206185567	99	0.042733767	0.115537781	0.029093866	0.033053763
M8090	3B	795540049	0.010253115	0.443298969	99	0.042733767	0.115075154	0.035063692	0.039836128
M7319	3B	44728934	0.010315314	0.391752577	99	0.042733767	0.114952584	0.03810723	0.043293915
M7535	3B	501653667	0.010378452	0.360824742	99	0.042733767	0.114828948	0.054808892	0.062268801
M12075	6A	5480595	0.010393611	0.340206186	99	0.042733767	0.114799381	0.092003224	-0.104525566
M12105	6A	5129073	0.010393611	0.340206186	99	0.042733767	0.114799381	0.092003224	-0.104525566
M11642	5B	486192860	0.010397844	0.463917526	99	0.042733767	0.114791134	0.034633726	-0.03934764
M1532	1B	564653541	0.010447762	0.484536082	99	0.042733767	0.114694129	0.028417896	-0.032285789
M1238	1B	442968471	0.010598006	0.164948454	99	0.042733767	0.114405063	0.033281644	-0.03781153
M236	1A	341122401	0.010599606	0.340206186	99	0.042733767	0.114402007	0.031511763	-0.035800755
M8598	4A	5349362	0.0107249	0.329896907	99	0.042733767	0.11416424	0.035143803	0.039927144
M4751	2B	600038125	0.010782559	0.453608247	99	0.042733767	0.114055796	0.037013717	-0.042051567
M6814	3A	731225976	0.010851922	0.020618557	99	0.042733767	0.113926138	0.074729271	-0.084900496
M11123	5B	698209017	0.010861941	0.216494845	99	0.042733767	0.113907482	0.024888778	0.028276331
M14351	7A	0	0.010960764	0.24742268	99	0.042733767	0.113724423	0.035178818	-0.039966924
M9048	4A	654345599	0.011061408	0.463917526	99	0.042733767	0.113539755	0.031738209	-0.036058021
M3931	2B	154602689	0.011085402	0.113402062	99	0.042733767	0.113495989	0.031089803	-0.035321363
M316	1A	481243230	0.011149136	0.340206186	99	0.042733767	0.113380215	0.02616113	-0.02972186
M4800	2B	744370715	0.011259397	0.216494845	99	0.042733767	0.113181547	0.029871805	0.033937586
M12051	6A	0	0.011267283	0.350515464	99	0.042733767	0.113167417	0.070901247	-0.080551448
M2123	1D	433032816	0.011358046	0.237113402	99	0.042733767	0.11300552	0.035859808	-0.040740602
M13690	6B	708010088	0.011386685	0.175257732	99	0.042733767	0.112954718	0.032145534	-0.036520786
M6472	3A	556260082	0.011466631	0.443298969	99	0.042733767	0.112813604	0.032951582	0.037436544
M8943	4A	674358804	0.011982367	0.329896907	99	0.042733767	0.111927308	0.029361106	-0.033357377
M4572	2B	398349905	0.012023958	0.144329897	99	0.042733767	0.111857581	0.030191814	-0.03430115
M14251	7A	0	0.012049042	0.391752577	99	0.042733767	0.11181565	0.028069432	-0.031889896
M347	1A	531535300	0.012136669	0.381443299	99	0.042733767	0.111669885	0.043193211	-0.049072137
M7253	3B	38713014	0.012217903	0.309278351	99	0.042733767	0.111535735	0.027409594	0.031140249
M8297	3D	18128457	0.012235848	0.195876289	99	0.042733767	0.111506225	0.031566657	-0.035863121
M15513	7B	611339700	0.012558777	0.226804124	99	0.042733767	0.110982814	0.029721085	0.033766351
M9049	4A	655668912	0.012698759	0.195876289	99	0.042733767	0.110760293	0.032107038	-0.036477051
M7256	3B	45197552	0.012774937	0.298969072	99	0.042733767	0.110640274	0.028622284	0.032517996
M2836	2A	428939693	0.012918757	0.494845361	99	0.042733767	0.110415714	0.028537719	0.03242192
M8531	4A	24767404	0.013140939	0.371134021	99	0.042733767	0.110073897	0.03510867	0.039887228
M6665	3A	701939041	0.013292811	0.412371134	99	0.042733767	0.109843716	0.047679817	0.054169405
M11121	5B	432995911	0.013299231	0.474226804	99	0.042733767	0.109834046	0.031540131	0.035832983
M4387	2B	545940419	0.013392589	0.422680412	99	0.042733767	0.109693984	0.025544916	-0.029021774
M14368	7A	20403281	0.013406206	0.340206186	99	0.042733767	0.109673641	0.041332204	0.046957833
M8638	4A	0	0.013422213	0.474226804	99	0.042733767	0.109649754	0.022678774	-0.025765528
M7300	3B	19380506	0.013448664	0.24742268	99	0.042733767	0.109610348	0.028206841	0.032046007
M7538	3B	505269921	0.013512791	0.195876289	99	0.042733767	0.109515149	0.027357111	0.031080623
M9410	4A	1273632	0.013746713	0.453608247	99	0.042733767	0.109171852	0.026667206	-0.030296816
M13673	6B	0	0.013833656	0.484536082	99	0.042733767	0.109045816	0.022686105	-0.025773857
M11903	5D	272149005	0.014011146	0.092783505	99	0.042733767	0.108791079	0.038541087	-0.043786823
M11117	5B	587102217	0.01407686	0.154639175	99	0.042733767	0.108697621	0.032514655	0.036940148
M7115	3B	20952119	0.014245391	0.463917526	99	0.042733767	0.108460016	0.035800575	-0.040673307
M7858	3B	559227303	0.014354204	0.134020619	99	0.042733767	0.108308164	0.031439064	0.035718161
M7243	3B	0	0.014428621	0.484536082	99	0.042733767	0.108205008	0.020604886	0.023409369
M7264	3B	47202036	0.014519691	0.268041237	99	0.042733767	0.108079524	0.02641366	-0.030008761
M6478	3A	568024952	0.014564888	0.360824742	99	0.042733767	0.108017555	0.029849361	0.033912087
M14091	6D	462479338	0.014595797	0.082474227	99	0.042733767	0.107975291	0.041323695	-0.046948165
M13543	6B	355769259	0.014683393	0.092783505	99	0.042733767	0.107856024	0.03667104	0.041662249
M13792	6B	472897480	0.014706629	0.432989691	99	0.042733767	0.107824512	0.030310703	0.034436221
M7372	3B	153650205	0.014710485	0.082474227	99	0.042733767	0.107819287	0.037435872	0.04253118
M4098	2B	305774933	0.014754045	0.051546392	99	0.042733767	0.107760369	0.043201741	0.049081828
M8650	4A	303362512	0.015000392	0.319587629	99	0.042733767	0.107430567	0.030588889	0.03475227
M14968	7A	710958106	0.015001705	0.443298969	99	0.042733767	0.107428823	0.026980668	0.030652943
M10363	5A	357707210	0.015185698	0.402061856	99	0.042733767	0.107186208	0.037466195	0.04256563
M1096	1B	342391060	0.015217979	0.154639175	99	0.042733767	0.10714396	0.029330282	0.033322357
M7472	3B	127778429	0.015357631	0.412371134	99	0.042733767	0.106962266	0.040190923	0.045661214
M6550	3A	172157756	0.015404145	0.474226804	99	0.042733767	0.106902134	0.028876584	0.032806908
M5221	2B	635759512	0.015454661	0.494845361	99	0.042733767	0.106837044	0.027481587	0.031222041
M9344	4A	7773196	0.015492685	0.484536082	99	0.042733767	0.106788197	0.027794068	0.031577053
M13954	6D	95594839	0.015503581	0.381443299	99	0.042733767	0.106774223	0.030456842	0.034602251
M10708	5B	119188411	0.015618438	0.391752577	99	0.042733767	0.106627543	0.042512934	-0.04829927
M8909	4A	651825178	0.015696674	0.268041237	99	0.042733767	0.106528277	0.033557482	0.038124912
M11124	5B	698209017	0.015753751	0.402061856	99	0.042733767	0.106456186	0.028964024	0.032906249
M10372	5A	572020800	0.015803723	0.257731959	99	0.042733767	0.106393293	0.027446006	0.031181618
M7323	3B	44296856	0.015842537	0.360824742	99	0.042733767	0.106344586	0.026828985	0.030480615
M4970	2B	765063142	0.016028857	0.103092784	99	0.042733767	0.106112512	0.034984236	-0.039745858
M10588	5B	576692587	0.016045442	0.06185567	99	0.042733767	0.106091992	0.04658333	0.052923677
M5549	2D	130133036	0.016143383	0.402061856	99	0.042733767	0.105971264	0.026130957	0.02968758
M8861	4A	690323784	0.016330765	0.329896907	99	0.042733767	0.105742416	0.027648265	0.031411405
M14025	6D	78756505	0.016369277	0.463917526	99	0.042733767	0.105695724	0.037206342	0.04227041
M2872	2A	557403153	0.016425388	0.154639175	99	0.042733767	0.1056279	0.028017504	0.0318309
M6932	3B	5760912	0.016436532	0.216494845	99	0.042733767	0.105614458	0.030719792	-0.03490099
M5985	2D	775734045	0.016540812	0.226804124	99	0.042733767	0.105489144	0.030574738	-0.034736193
M11592	5B	680236004	0.016738565	0.443298969	99	0.042733767	0.105253766	0.022822414	-0.025928719
M7834	3B	552424614	0.016747077	0.020618557	99	0.042733767	0.1052437	0.070650235	-0.080266272
M12043	6A	1033153	0.016755235	0.494845361	99	0.042733767	0.105234058	0.028500755	0.032379926
M8814	4A	605005072	0.016799879	0.494845361	99	0.042733767	0.105181379	0.02798767	-0.031797006
M8903	4A	674340235	0.016869129	0.226804124	99	0.042733767	0.105099957	0.029899488	0.033969037
M4968	2B	765220771	0.016897503	0.350515464	99	0.042733767	0.105066696	0.02635155	0.029938197
M9489	4B	22175275	0.016904534	0.309278351	99	0.042733767	0.105058464	0.020838199	-0.023674437
M15313	7B	333414790	0.016934538	0.494845361	99	0.042733767	0.105023372	0.026946442	-0.030614059
M15344	7B	389007875	0.016965658	0.402061856	99	0.042733767	0.104987044	0.04428755	-0.050315424
M11125	5B	698122265	0.017054253	0.144329897	99	0.042733767	0.104884005	0.030705598	0.034884864
M2276	1D	676009151	0.017114355	0.278350515	99	0.042733767	0.104814423	0.02832135	0.032176102
M7502	3B	392957146	0.01714774	0.412371134	99	0.042733767	0.104775885	0.040199413	0.045670861
M7561	3B	416211618	0.017337814	0.278350515	99	0.042733767	0.104557956	0.025675372	-0.029169987
M6018	3A	717909949	0.017422433	0.432989691	99	0.042733767	0.104461744	0.02665441	0.030282279
M13151	6B	100895291	0.017552491	0.412371134	99	0.042733767	0.104314821	0.040812441	0.046367326
M7563	3B	542732072	0.017601704	0.484536082	99	0.042733767	0.104259525	0.027392316	-0.03112062
M12103	6A	0	0.017648698	0.010309278	99	0.042733767	0.104206873	0.089512114	0.101695397
M12106	6A	5129073	0.017648698	0.010309278	99	0.042733767	0.104206873	0.089512114	-0.101695397
M7211	3B	0	0.017897984	0.371134021	99	0.042733767	0.10393002	0.057206964	-0.064993269
M6135	3A	455701026	0.01806557	0.329896907	99	0.042733767	0.103746172	0.021547115	0.024479842
M13538	6B	478415114	0.018076752	0.041237113	99	0.042733767	0.103733968	0.05039212	0.057250872
M11058	5B	0	0.018148529	0.319587629	99	0.042733767	0.103655826	0.024370708	0.027687748
M13698	6B	713822686	0.01826371	0.484536082	99	0.042733767	0.103531105	0.023911189	0.027165685
M7161	3B	28279863	0.018267726	0.030927835	99	0.042733767	0.103526771	0.056519294	-0.064212002
M7315	3B	55092506	0.018267726	0.030927835	99	0.042733767	0.103526771	0.056519294	-0.064212002
M15568	7B	672025248	0.018363834	0.154639175	99	0.042733767	0.10342336	0.02511866	-0.028537501
M2827	2A	412255299	0.018411321	0.134020619	99	0.042733767	0.103372474	0.027819657	-0.031606124
M7462	3B	282944591	0.018432484	0.298969072	99	0.042733767	0.103349841	0.021536246	-0.024467493
M6941	3B	680980839	0.018536764	0.350515464	99	0.042733767	0.103238714	0.070672333	-0.080291377
M6274	3A	45708165	0.018672229	0.072164948	99	0.042733767	0.103095335	0.03692271	-0.041948173
M8899	4A	668854110	0.01871498	0.237113402	99	0.042733767	0.103050312	0.02341828	0.026605687
M5058	2B	764073687	0.018723146	0.288659794	99	0.042733767	0.103041725	0.027637223	-0.03139886
M6201	3A	23155739	0.018814772	0.453608247	99	0.042733767	0.10294564	0.032154629	0.03653112
M3643	2B	50713994	0.018905035	0.340206186	99	0.042733767	0.102851464	0.022579968	0.025653274
M13518	6B	635173407	0.019001545	0.381443299	99	0.042733767	0.102751292	0.026769093	0.030412571
M7239	3B	42562343	0.019010487	0.371134021	99	0.042733767	0.102742039	0.026434663	-0.030032622
M7408	3B	73443935	0.019119286	0.113402062	99	0.042733767	0.102629808	0.032709598	0.037161624
M12148	6A	8803926	0.019273033	0.020618557	99	0.042733767	0.102472354	0.06660801	0.075673869
M4069	2B	200573662	0.019283175	0.072164948	99	0.042733767	0.102462013	0.037213833	0.042278919
M15460	7B	583544299	0.019379466	0.278350515	99	0.042733767	0.102364126	0.026841377	-0.030494694
M11997	5D	553338175	0.019380948	0.484536082	99	0.042733767	0.102362624	0.029133267	-0.033098528
M11762	5B	681979338	0.019388848	0.453608247	99	0.042733767	0.102354616	0.021430398	-0.024347239
M7473	3B	389310464	0.019519104	0.402061856	99	0.042733767	0.10222308	0.04033526	0.045825197
M8729	4A	532076077	0.019611542	0.391752577	99	0.042733767	0.102130294	0.023788864	-0.027026711
M10288	5A	0	0.019684753	0.041237113	99	0.042733767	0.102057132	0.041585556	-0.047245668
M4617	2B	316009740	0.019707796	0.113402062	99	0.042733767	0.102034164	0.030057876	-0.034148983
M6200	3A	486177257	0.019806087	0.12371134	99	0.042733767	0.10193651	0.02979388	0.033849054
M726	1B	3164636	0.019875024	0.195876289	99	0.042733767	0.101868324	0.027879416	0.031674018
M8458	3D	666983570	0.019890657	0.329896907	99	0.042733767	0.101852896	0.023986758	-0.027251538
M10040	5A	441478599	0.019940862	0.226804124	99	0.042733767	0.101803435	0.030119121	0.034218563
M5096	2B	772063506	0.020055953	0.443298969	99	0.042733767	0.101690544	0.020657334	-0.023468955
M2842	2A	143209404	0.020171975	0.381443299	99	0.042733767	0.101577428	0.035449585	0.040274544
M3820	2B	100325164	0.020232472	0.113402062	99	0.042733767	0.101518717	0.033797539	-0.038397643
M3568	2B	31608031	0.020266098	0.309278351	99	0.042733767	0.101486164	0.02643419	-0.030032085
M10369	5A	568264305	0.020429578	0.432989691	99	0.042733767	0.101328709	0.029161193	-0.033130254
M7541	3B	492105153	0.020451896	0.412371134	99	0.042733767	0.101307316	0.020897397	-0.023741692
M8262	3D	6060550	0.020548791	0.484536082	99	0.042733767	0.101214724	0.030956633	-0.035170068
M7840	3B	734436502	0.020604958	0.051546392	99	0.042733767	0.101161262	0.044762335	-0.050854831
M9047	4A	654345599	0.0207783	0.463917526	99	0.042733767	0.10099723	0.028203859	0.03204262
M8244	3D	0	0.020810988	0.144329897	99	0.042733767	0.100966459	0.034178587	-0.038830554
M5817	2D	606164081	0.02082514	0.463917526	99	0.042733767	0.100953153	0.031186602	-0.035431336
M11110	5B	515186754	0.020917094	0.453608247	99	0.042733767	0.100866927	0.025785177	0.029294737
M3981	2B	0	0.021013498	0.164948454	99	0.042733767	0.100776957	0.024727687	-0.028093314
M2921	2A	16885170	0.021074206	0.371134021	99	0.042733767	0.100720523	0.025568868	0.029048987
M15569	7B	653890555	0.021096965	0.072164948	99	0.042733767	0.10069941	0.047737473	-0.054234908
M7971	3B	146553872	0.021162914	0.206185567	99	0.042733767	0.100638368	0.022977828	-0.026105286
M8822	4A	132119668	0.02136892	0.206185567	99	0.042733767	0.100448973	0.02536777	0.028820518
M13718	6B	0	0.021376249	0.453608247	99	0.042733767	0.100442271	0.028320701	0.032175365
M8913	4A	330012453	0.021430012	0.144329897	99	0.042733767	0.100393177	0.032627989	0.037068907
M7540	3B	513663423	0.021504693	0.288659794	99	0.042733767	0.100325198	0.022982626	0.026110737
M4942	2B	762091833	0.021658045	0.041237113	99	0.042733767	0.100186384	0.044710764	-0.050796241
M7284	3B	48788274	0.021675792	0.402061856	99	0.042733767	0.100170386	0.027070276	-0.030754747
M5639	2D	593898542	0.021724995	0.134020619	99	0.042733767	0.100126106	0.027435941	0.031170182
M12048	6A	1889547	0.02190957	0.443298969	99	0.042733767	0.099960935	0.020916287	0.023763154
M4703	2B	328458274	0.021931303	0.226804124	99	0.042733767	0.099941583	0.02496193	-0.028359439
M10540	5B	1440674	0.022012972	0.494845361	99	0.042733767	0.099869043	0.028562447	0.032450014
M4788	2B	734634084	0.022027673	0.257731959	99	0.042733767	0.099856016	0.027318252	-0.031036475
M8426	3D	458364724	0.022065749	0.412371134	99	0.042733767	0.099822317	0.02407404	-0.027350701
M4122	2B	305658684	0.022082452	0.154639175	99	0.042733767	0.099807553	0.031534194	0.035826238
M8100	3B	702728099	0.022085876	0.06185567	99	0.042733767	0.099804529	0.041115009	0.046711075
M11964	5D	531606683	0.022132301	0.371134021	99	0.042733767	0.099763563	0.022859324	-0.025970652
M10422	5A	570937592	0.022244853	0.24742268	99	0.042733767	0.099664621	0.024012302	-0.02728056
M6681	3A	710340945	0.022276369	0.072164948	99	0.042733767	0.09963701	0.036098411	0.04101168
M14969	7A	621160098	0.02228366	0.474226804	99	0.042733767	0.099630629	0.02380938	0.027050018
M9260	4A	724783161	0.022312465	0.422680412	99	0.042733767	0.099605438	0.022519157	0.025584186
M15014	7A	704330351	0.022322396	0.113402062	99	0.042733767	0.099596762	0.033782488	-0.038380542
M5538	2D	403467899	0.022330405	0.453608247	99	0.042733767	0.099589767	0.030853716	-0.035053142
M14293	7A	0	0.022336333	0.113402062	99	0.042733767	0.099584591	0.031822078	-0.036153306
M6529	3A	639700048	0.022393987	0.092783505	99	0.042733767	0.099534331	0.033195223	0.037713346
M222	1A	0	0.022506606	0.134020619	99	0.042733767	0.099436549	0.028058227	-0.031877166
M5784	2D	611125588	0.022564212	0.226804124	99	0.042733767	0.099386731	0.022762312	0.025860436
M5660	2D	620224144	0.022648002	0.309278351	99	0.042733767	0.099314509	0.021179356	0.024062028
M14999	7A	722383511	0.022676026	0.463917526	99	0.042733767	0.099290417	0.037394484	-0.042484159
M2924	2A	691480240	0.022723335	0.144329897	99	0.042733767	0.099249816	0.026706734	-0.030341724
M8589	4A	85574825	0.022747778	0.237113402	99	0.042733767	0.099228874	0.027580852	0.031334816
M14693	7A	255900956	0.022796551	0.484536082	99	0.042733767	0.099187158	0.024220833	-0.027517474
M3964	2B	165049205	0.022905692	0.092783505	99	0.042733767	0.099094149	0.037629801	0.042751505
M4287	2B	159563563	0.022940415	0.463917526	99	0.042733767	0.099064656	0.030359589	0.034491761
M7177	3B	29498622	0.023069217	0.051546392	99	0.042733767	0.098955666	0.046370574	0.052681964
M4739	2B	728198487	0.023199646	0.422680412	99	0.042733767	0.098845952	0.036595217	0.041576105
M7539	3B	513663423	0.023258374	0.412371134	99	0.042733767	0.098796765	0.022768314	0.025867255
M15305	7B	113572118	0.023355633	0.319587629	99	0.042733767	0.098715592	0.022281192	0.025313832
M8583	4A	716765921	0.023361681	0.309278351	99	0.042733767	0.098710557	0.030844604	0.03504279
M7554	3B	0	0.02345244	0.340206186	99	0.042733767	0.098635151	0.03274246	0.037198959
M705	1B	3572450	0.023506043	0.371134021	99	0.042733767	0.098590761	0.020906955	0.023752551
M4746	2B	266504838	0.023526558	0.257731959	99	0.042733767	0.0985738	0.02073387	-0.023555908
M14179	7A	8931917	0.023549311	0.164948454	99	0.042733767	0.098555007	0.036507046	-0.041475934
M14002	6D	488198477	0.023867023	0.164948454	99	0.042733767	0.098294579	0.030336371	-0.034465383
M6461	3A	423845712	0.024073024	0.051546392	99	0.042733767	0.09812767	0.042382055	-0.048150576
M14894	7A	694675632	0.024121668	0.268041237	99	0.042733767	0.098088478	0.026538743	-0.030150869
M4293	2B	454344609	0.024150045	0.257731959	99	0.042733767	0.098065653	0.022730237	-0.025823996
M13712	6B	464521037	0.024179344	0.453608247	99	0.042733767	0.098042116	0.032400038	0.03680993
M14931	7A	699147857	0.024191917	0.443298969	99	0.042733767	0.098032025	0.041159435	-0.046761549
M7099	3B	21948664	0.024271662	0.494845361	99	0.042733767	0.097968151	0.03169401	0.036007807
M3832	2B	143000939	0.024379621	0.484536082	99	0.042733767	0.09788203	0.028637934	0.032535775
M12049	6A	5124270	0.024457308	0.195876289	99	0.042733767	0.097820307	0.028964827	-0.032907161
M3811	2B	63706836	0.024546622	0.113402062	99	0.042733767	0.097749601	0.034248948	0.038910491
M5524	2D	168394797	0.024555705	0.371134021	99	0.042733767	0.097742426	0.027879613	0.031674241
M260	1A	387811947	0.024566018	0.278350515	99	0.042733767	0.097734283	0.023077849	0.02621892
M15018	7A	713138041	0.024767997	0.06185567	99	0.042733767	0.097575517	0.044771484	0.050865225
M11576	5B	4511373	0.024821542	0.144329897	99	0.042733767	0.097533657	0.030782258	0.034971959
M2213	1D	475877262	0.024938889	0.443298969	99	0.042733767	0.097442252	0.025274019	0.028714006
M1502	1B	558913560	0.024949787	0.402061856	99	0.042733767	0.097433786	0.025109486	-0.028527079
M6140	3A	309672008	0.024961106	0.329896907	99	0.042733767	0.097424998	0.021191937	0.024076321
M5525	2D	66312323	0.02505418	0.391752577	99	0.042733767	0.09735289	0.02678924	-0.03043546
M4727	2B	712642131	0.025121992	0.412371134	99	0.042733767	0.097300532	0.026307004	-0.029887588
M13920	6D	12435844	0.025164234	0.309278351	99	0.042733767	0.097267993	0.023566387	0.026773952
M14044	6D	625779148	0.025187658	0.402061856	99	0.042733767	0.097249973	0.033819906	0.038423053
M11362	5B	180679040	0.025211971	0.206185567	99	0.042733767	0.097231289	0.023387432	-0.02657064
M10461	5A	614408666	0.025342193	0.391752577	99	0.042733767	0.097131539	0.021974809	0.024965748
M5300	2B	789875741	0.025423728	0.020618557	99	0.042733767	0.097069359	0.059682202	0.067805406
M11627	5B	596950005	0.025480652	0.463917526	99	0.042733767	0.097026072	0.027987602	-0.031796929
M14948	7A	704615462	0.025486452	0.443298969	99	0.042733767	0.097021668	0.029277202	0.033262052
M11650	5B	600731527	0.025520209	0.164948454	99	0.042733767	0.096996053	0.02692983	0.030595185
M1660	1B	164887594	0.025711631	0.134020619	99	0.042733767	0.096851474	0.024627476	0.027979463
M8876	4A	248917076	0.025754317	0.329896907	99	0.042733767	0.096819389	0.026696765	-0.030330398
M5117	2B	510095712	0.02575651	0.113402062	99	0.042733767	0.096817742	0.029767713	-0.033819327
M8873	4A	45129083	0.025776392	0.381443299	99	0.042733767	0.096802818	0.030329268	-0.034457313
M4907	2B	56998893	0.025785464	0.463917526	99	0.042733767	0.096796013	0.023403091	0.02658843
M13714	6B	0	0.025787966	0.391752577	99	0.042733767	0.096794136	0.039589616	0.044978066
M209	1A	135164309	0.025886438	0.453608247	99	0.042733767	0.096720435	0.020658925	0.023470763
M13371	6B	206564330	0.025923896	0.474226804	99	0.042733767	0.096692478	0.027816878	-0.031602968
M10896	5B	540055568	0.025983991	0.309278351	99	0.042733767	0.096647714	0.022306552	0.025342645
M14235	7A	405822737	0.026032282	0.268041237	99	0.042733767	0.096611823	0.02202299	-0.025020487
M1542	1B	545644656	0.02617869	0.154639175	99	0.042733767	0.096503436	0.028666587	0.032568329
M6281	3A	29861477	0.026226178	0.484536082	99	0.042733767	0.096468417	0.035113616	0.039892847
M9865	5A	18572611	0.0263033	0.175257732	99	0.042733767	0.09641169	0.030232006	-0.034346813
M5973	2D	640265844	0.026316598	0.144329897	99	0.042733767	0.096401926	0.035567615	0.040408639
M5981	2D	642441495	0.026316598	0.144329897	99	0.042733767	0.096401926	0.035567615	0.040408639
M7532	3B	550313136	0.026319319	0.134020619	99	0.042733767	0.096399929	0.026202478	0.029768835
M8854	4A	301817649	0.026343644	0.402061856	99	0.042733767	0.096382085	0.025177544	0.0286044
M10541	5B	2625302	0.026464283	0.041237113	99	0.042733767	0.096293844	0.04098579	0.046564269
M4704	2B	328458274	0.026476775	0.443298969	99	0.042733767	0.096284731	0.022794926	0.02589749
M10376	5A	572043684	0.026492652	0.164948454	99	0.042733767	0.096273155	0.027247203	-0.030955755
M1153	1B	0	0.026500357	0.226804124	99	0.042733767	0.096267539	0.028667012	-0.032568811
M13607	6B	545680228	0.026578646	0.391752577	99	0.042733767	0.096210585	0.021615047	-0.02455702
M4984	2B	763473937	0.026655315	0.103092784	99	0.042733767	0.09615498	0.031809626	-0.036139159
M7536	3B	501653667	0.026812716	0.195876289	99	0.042733767	0.096041353	0.023629112	-0.026845215
M3680	2B	38442340	0.026909	0.082474227	99	0.042733767	0.095972194	0.040932979	0.04650427
M7531	3B	550313136	0.02700275	0.412371134	99	0.042733767	0.095905106	0.023381607	0.026564022
M6002	2D	636354137	0.027018167	0.309278351	99	0.042733767	0.095894097	0.022639955	-0.025721426
M13821	6B	0	0.027137437	0.381443299	99	0.042733767	0.095809154	0.027433479	-0.031167386
M15376	7B	518835133	0.027224688	0.402061856	99	0.042733767	0.095747265	0.026168231	0.029729927
M14170	7A	11374457	0.027236667	0.164948454	99	0.042733767	0.095738784	0.03112942	0.035366372
M14317	7A	19151787	0.02725409	0.474226804	99	0.042733767	0.095726456	0.027706617	-0.031477699
M9262	4A	410117076	0.02738272	0.443298969	99	0.042733767	0.095635701	0.023969715	0.027232177
M7514	3B	448772162	0.027408155	0.030927835	99	0.042733767	0.095617809	0.046807165	-0.053177978
M5506	2D	77635178	0.027439456	0.412371134	99	0.042733767	0.095595814	0.02795404	0.031758799
M8022	3B	775710699	0.027447108	0.360824742	99	0.042733767	0.095590442	0.052296818	0.059414814
M8049	3B	12179959	0.027447108	0.360824742	99	0.042733767	0.095590442	0.052296818	-0.059414814
M5495	2D	77122284	0.027553481	0.453608247	99	0.042733767	0.095515916	0.026076375	0.029625569
M5279	2B	549670301	0.027578595	0.216494845	99	0.042733767	0.095498366	0.028322518	0.032177429
M8521	3D	615201989	0.027592876	0.412371134	99	0.042733767	0.095488393	0.026783531	0.030428974
M3367	2A	753091715	0.027622234	0.360824742	99	0.042733767	0.095467909	0.065180362	-0.074051908
M8837	4A	530834960	0.027631169	0.206185567	99	0.042733767	0.095461679	0.028612346	0.032506704
M8853	4A	301817649	0.027631169	0.206185567	99	0.042733767	0.095461679	0.028612346	0.032506704
M12194	6A	150550559	0.027742221	0.18556701	99	0.042733767	0.09538443	0.024961114	-0.028358513
M3445	2B	15696396	0.02775418	0.360824742	99	0.042733767	0.095376131	0.028292953	-0.03214384
M9177	4A	25353003	0.027787428	0.453608247	99	0.042733767	0.095353078	0.027987245	0.031796523
M3633	2B	31910530	0.027823307	0.309278351	99	0.042733767	0.095328233	0.026928543	0.030593723
M3532	2B	9887842	0.027917176	0.082474227	99	0.042733767	0.095263393	0.03786814	-0.043022283
M12052	6A	0	0.027938638	0.134020619	99	0.042733767	0.095248599	0.030194755	0.034304492
M6157	3A	575259106	0.028004985	0.309278351	99	0.042733767	0.095202946	0.024131728	-0.027416241
M3329	2A	765631505	0.028117881	0.432989691	99	0.042733767	0.095125525	0.020582429	-0.023383855
M11549	5B	563543624	0.028156997	0.195876289	99	0.042733767	0.095098778	0.023586993	-0.026797363
M4731	2B	712361439	0.02823343	0.432989691	99	0.042733767	0.095046626	0.019909921	0.022619813
M6327	3A	108688443	0.028280319	0.371134021	99	0.042733767	0.095014706	0.024702922	-0.028065179
M14387	7A	702331405	0.028326663	0.484536082	99	0.042733767	0.094983213	0.030048571	0.034138411
M4735	2B	712959228	0.028357887	0.402061856	99	0.042733767	0.094962025	0.033880437	-0.038491823
M8215	3B	613915490	0.02843796	0.154639175	99	0.042733767	0.094907803	0.035003613	0.039767873
M11130	5B	531357699	0.028464069	0.175257732	99	0.042733767	0.094890158	0.025160353	0.028584869
M7292	3B	557949309	0.028475665	0.041237113	99	0.042733767	0.094882326	0.046258002	0.05255407
M7290	3B	51225085	0.028475665	0.041237113	99	0.042733767	0.094882326	0.046258002	-0.05255407
M12863	6A	611334867	0.028537636	0.216494845	99	0.042733767	0.094840532	0.031090563	-0.035322226
M12908	6A	615640353	0.028631053	0.360824742	99	0.042733767	0.094777711	0.021939748	-0.024925915
M6920	3B	373696	0.028680856	0.206185567	99	0.042733767	0.094744308	0.027797597	0.031581062
M3666	2B	59764104	0.028708402	0.474226804	99	0.042733767	0.09472586	0.020119105	-0.022857468
M14972	7A	621160098	0.028743362	0.082474227	99	0.042733767	0.094702473	0.029648033	-0.033683357
M3632	2B	286756395	0.02878433	0.463917526	99	0.042733767	0.094675105	0.019765675	-0.022455934
M12036	6A	955957	0.02883727	0.041237113	99	0.042733767	0.0946398	0.043061121	0.048922069
M3959	2B	206507486	0.02905071	0.350515464	99	0.042733767	0.094498156	0.060849025	-0.069131042
M6577	3A	660003685	0.029062232	0.422680412	99	0.042733767	0.094490541	0.034408308	-0.039091541
M6258	3A	471583434	0.029196278	0.18556701	99	0.042733767	0.094402185	0.030891983	0.035096618
M5180	2B	763798678	0.029248249	0.24742268	99	0.042733767	0.094368044	0.023013954	-0.026146329
M6052	3A	143037183	0.02928549	0.402061856	99	0.042733767	0.094343619	0.04235773	-0.04812294
M12056	6A	1338546	0.029347707	0.18556701	99	0.042733767	0.094302887	0.025124654	0.028544312
M4754	2B	600038125	0.0294729	0.360824742	99	0.042733767	0.094221202	0.025801774	-0.029313593
M5526	2D	66312323	0.02960851	0.340206186	99	0.042733767	0.094133135	0.0268249	-0.030475974
M13662	6B	703823041	0.029615539	0.432989691	99	0.042733767	0.094128582	0.02505345	0.028463417
M5173	2B	0	0.029662115	0.350515464	99	0.042733767	0.094098441	0.031473212	-0.035756956
M7232	3B	22276588	0.029931515	0.329896907	99	0.042733767	0.093925083	0.024783927	0.028157208
M4817	2B	606156145	0.029989491	0.350515464	99	0.042733767	0.093887993	0.061312868	0.069658018
M11001	5B	486082208	0.030063703	0.134020619	99	0.042733767	0.093840625	0.034562492	0.039266711
M6267	3A	41617458	0.030071177	0.484536082	99	0.042733767	0.093835862	0.032715093	0.037167867
M14172	7A	501554142	0.030099781	0.494845361	99	0.042733767	0.093817643	0.029997014	-0.034079837
M10241	5A	224479989	0.030118157	0.309278351	99	0.042733767	0.093805948	0.023092981	-0.026236112
M1214	1B	111837904	0.030187524	0.494845361	99	0.042733767	0.09376187	0.019061152	-0.021655521
M6442	3A	516733247	0.03028233	0.134020619	99	0.042733767	0.093701801	0.023036849	-0.026172341
M124	1A	15325325	0.030435071	0.206185567	99	0.042733767	0.093605442	0.021797846	0.0247647
M12002	5D	554401631	0.030450616	0.164948454	99	0.042733767	0.093595664	0.026877855	-0.030536136
M10507	5A	680532072	0.030564179	0.422680412	99	0.042733767	0.093524393	0.023617141	0.026831614
M2273	1D	481841103	0.030607213	0.278350515	99	0.042733767	0.093497458	0.026684714	-0.030316708
M4154	2B	183207936	0.030738422	0.216494845	99	0.042733767	0.093415583	0.023765506	-0.027000173
M12057	6A	7901769	0.030852846	0.432989691	99	0.042733767	0.093344485	0.027477871	0.031217819
M10607	5B	369428012	0.030887076	0.432989691	99	0.042733767	0.09332327	0.03120564	-0.035452966
M3724	2B	149684945	0.030909149	0.06185567	99	0.042733767	0.093309603	0.034396333	-0.039077937
M7368	3B	134220980	0.030912588	0.103092784	99	0.042733767	0.093307474	0.030502705	-0.034654357
M5172	2B	557779162	0.030913712	0.381443299	99	0.042733767	0.093306779	0.01916565	0.021774241
M8945	4A	91210964	0.030952041	0.432989691	99	0.042733767	0.093283075	0.020149213	-0.022891674
M7845	3B	701892192	0.030994214	0.350515464	99	0.042733767	0.09325703	0.064096033	-0.072819993
M10543	5B	1261539	0.03113769	0.257731959	99	0.042733767	0.093168703	0.021112246	0.023985784
M4198	2B	151482156	0.03117757	0.082474227	99	0.042733767	0.093144229	0.03167292	-0.035983847
M13701	6B	710012309	0.031195403	0.288659794	99	0.042733767	0.093133296	0.023576274	0.026785185
M8896	4A	635530599	0.03130797	0.298969072	99	0.042733767	0.093064434	0.022343309	-0.025384404
M6486	3A	598916422	0.031309996	0.164948454	99	0.042733767	0.093063197	0.023009949	-0.026141779
M5631	2D	611215180	0.031355139	0.371134021	99	0.042733767	0.093035658	0.021411518	-0.024325789
M1707	1B	580578970	0.031386422	0.24742268	99	0.042733767	0.093016597	0.020679084	-0.023493665
M7497	3B	381348475	0.031422345	0.072164948	99	0.042733767	0.092994736	0.037348243	0.042431625
M12035	6A	955957	0.031452119	0.360824742	99	0.042733767	0.092976636	0.04947011	0.05620337
M11581	5B	584614254	0.031496902	0.463917526	99	0.042733767	0.092949447	0.029255132	-0.033236979
M7530	3B	414191577	0.031500993	0.319587629	99	0.042733767	0.092946965	0.028641839	-0.032540212
M14109	6D	471189232	0.031602741	0.494845361	99	0.042733767	0.092885351	0.029917542	0.033989548
M8099	3B	702728099	0.031691652	0.12371134	99	0.042733767	0.092831683	0.028778177	-0.032695107
M7247	3B	658078022	0.031714113	0.278350515	99	0.042733767	0.092818151	0.023590453	0.026801294
M14028	6D	376894633	0.031717659	0.484536082	99	0.042733767	0.092816015	0.026068356	0.029616458
M11913	5D	341609030	0.031751229	0.360824742	99	0.042733767	0.092795811	0.062763484	-0.071306073
M5196	2B	788005120	0.031751229	0.360824742	99	0.042733767	0.092795811	0.062763484	-0.071306073
M14212	7A	10884688	0.031751229	0.360824742	99	0.042733767	0.092795811	0.062763484	0.071306073
M14515	7A	57742411	0.031751229	0.360824742	99	0.042733767	0.092795811	0.062763484	0.071306073
M15017	7A	713138041	0.031751229	0.360824742	99	0.042733767	0.092795811	0.062763484	0.071306073
M15019	7A	712493182	0.031751229	0.360824742	99	0.042733767	0.092795811	0.062763484	0.071306073
M5178	2B	0	0.031751229	0.360824742	99	0.042733767	0.092795811	0.062763484	0.071306073
M5212	2B	116192482	0.031751229	0.360824742	99	0.042733767	0.092795811	0.062763484	0.071306073
M6730	3A	0	0.031751229	0.360824742	99	0.042733767	0.092795811	0.062763484	0.071306073
M8197	3B	819744121	0.031751229	0.360824742	99	0.042733767	0.092795811	0.062763484	0.071306073
M4795	2B	732056365	0.031773956	0.340206186	99	0.042733767	0.092782145	0.035705533	0.040565329
M14619	7A	116005684	0.031799101	0.329896907	99	0.042733767	0.092767038	0.022439432	-0.025493611
M6340	3A	459068976	0.031836768	0.237113402	99	0.042733767	0.092744431	0.026752381	-0.030393585
M7498	3B	381348475	0.031945959	0.391752577	99	0.042733767	0.092679057	0.039503175	0.044879859
M7503	3B	414366969	0.031945959	0.391752577	99	0.042733767	0.092679057	0.039503175	-0.044879859
M3701	2B	38093674	0.031998635	0.360824742	99	0.042733767	0.092647605	0.039197995	-0.044533142
M6376	3A	56679772	0.032090259	0.474226804	99	0.042733767	0.092593028	0.030796853	0.03498854
M6877	3A	613741323	0.032209409	0.175257732	99	0.042733767	0.092522301	0.027273691	-0.030985849
M6247	3A	251028863	0.032210057	0.278350515	99	0.042733767	0.092521917	0.027267347	0.030978642
M11528	5B	562983853	0.032217781	0.288659794	99	0.042733767	0.092517341	0.025257452	0.028695184
M10506	5A	681463909	0.032337892	0.371134021	99	0.042733767	0.092446345	0.035451325	-0.040276521
M12379	6A	26881802	0.032467953	0.371134021	99	0.042733767	0.092369782	0.027867911	-0.031660946
M1315	1B	184220516	0.032539573	0.06185567	99	0.042733767	0.092327761	0.041421875	0.047059708
M925	1B	33009274	0.032539573	0.06185567	99	0.042733767	0.092327761	0.041421875	0.047059708
M8745	4A	478288955	0.032576572	0.381443299	99	0.042733767	0.092306091	0.028926456	0.032863568
M4936	2B	752843256	0.032609163	0.463917526	99	0.042733767	0.092287025	0.020973966	-0.023828683
M7496	3B	335094862	0.032681888	0.216494845	99	0.042733767	0.092244552	0.02338346	-0.026566127
M6745	3A	716253361	0.032689532	0.216494845	99	0.042733767	0.092240094	0.022981304	0.026109235
M14029	6D	376894633	0.032735255	0.154639175	99	0.042733767	0.092213448	0.024096782	0.027376538
M13929	6D	48869074	0.032763469	0.350515464	99	0.042733767	0.092197027	0.028331475	0.032187605
M5599	2D	665523602	0.032928876	0.402061856	99	0.042733767	0.092101053	0.029335757	0.033328578
M7317	3B	44728934	0.03297006	0.360824742	99	0.042733767	0.092077237	0.050397894	0.057257432
M12029	5D	561671357	0.033006351	0.494845361	99	0.042733767	0.092056276	0.027347992	0.031070263
M6547	3A	649815141	0.033017432	0.164948454	99	0.042733767	0.092049881	0.026352769	0.029939583
M4765	2B	599789141	0.033032821	0.412371134	99	0.042733767	0.092041004	0.029010931	0.032959541
M6723	3A	715199344	0.033046237	0.422680412	99	0.042733767	0.092033268	0.026492461	0.030098287
M544	1A	557295605	0.033144237	0.226804124	99	0.042733767	0.091976861	0.024994218	0.028396122
M5711	2D	570998838	0.03320245	0.443298969	99	0.042733767	0.091943438	0.02664258	-0.030268839
M11118	5B	587102217	0.033225399	0.144329897	99	0.042733767	0.091930279	0.02863749	-0.032535271
M7675	3B	154191322	0.033616414	0.453608247	99	0.042733767	0.091707547	0.026872608	0.030530175
M13729	6B	708271328	0.033693392	0.298969072	99	0.042733767	0.091664023	0.025559358	0.029038181
M771	1B	0	0.033759602	0.360824742	99	0.042733767	0.091626672	0.049879053	-0.056667973
M4797	2B	745066666	0.033782286	0.381443299	99	0.042733767	0.091613893	0.041439608	0.047079856
M7543	3B	392957146	0.033794236	0.381443299	99	0.042733767	0.091607165	0.040864531	-0.046426506
M11792	5B	656472011	0.033797567	0.237113402	99	0.042733767	0.09160529	0.023519099	-0.026720228
M13095	6B	347314097	0.033833416	0.432989691	99	0.042733767	0.091585123	0.030633068	0.034802463
M3645	2B	32640726	0.033836169	0.494845361	99	0.042733767	0.091583576	0.01921979	-0.02183575
M13964	6D	26988617	0.033926536	0.391752577	99	0.042733767	0.091532845	0.036831355	-0.041844384
M6948	3B	5857902	0.03406496	0.237113402	99	0.042733767	0.091455414	0.027503202	-0.031246597
M12728	6A	0	0.034142625	0.391752577	99	0.042733767	0.091412116	0.023564743	-0.026772085
M10845	5B	395681464	0.034234559	0.082474227	99	0.042733767	0.091360999	0.032942291	0.037425989
M5600	2D	665523602	0.034503141	0.12371134	99	0.042733767	0.091212495	0.029824394	-0.033883722
M12393	6A	15456720	0.034553919	0.288659794	99	0.042733767	0.091184557	0.028665096	-0.032566635
M14313	7A	18681090	0.034692503	0.340206186	99	0.042733767	0.091108531	0.021733887	-0.024692035
M8699	4A	412674356	0.034756701	0.309278351	99	0.042733767	0.091073422	0.024860773	0.028244514
M12794	6A	598854590	0.03480265	0.484536082	99	0.042733767	0.091048335	0.026514556	-0.03012339
M6615	3A	683215818	0.03498074	0.06185567	99	0.042733767	0.090951436	0.036003459	0.040903805
M3136	2A	756929010	0.03509883	0.195876289	99	0.042733767	0.090887473	0.022071826	-0.02507597
M5167	2B	779863093	0.035296213	0.041237113	99	0.042733767	0.09078107	0.047418851	-0.053872919
M7872	3B	559218778	0.035404487	0.443298969	99	0.042733767	0.090722972	0.024667831	-0.028025312
M7362	3B	129438266	0.035506545	0.402061856	99	0.042733767	0.090668382	0.031361563	0.035630111
M5591	2D	739690772	0.035577909	0.391752577	99	0.042733767	0.090630309	0.02709376	0.030781427
M8334	3D	38010250	0.035671776	0.288659794	99	0.042733767	0.090580355	0.0212439	0.024135358
M9227	4A	731340115	0.03575229	0.381443299	99	0.042733767	0.090537618	0.023392057	0.026575894
M7718	3B	0	0.035768908	0.175257732	99	0.042733767	0.09052881	0.024116601	0.027399054
M1136	1B	317186664	0.035833305	0.257731959	99	0.042733767	0.090494719	0.027592928	-0.031348536
M267	1A	339927631	0.03592748	0.319587629	99	0.042733767	0.090444981	0.04729737	-0.053734904
M6738	3A	715541796	0.035940925	0.24742268	99	0.042733767	0.090437892	0.023192604	0.026349294
M743	1B	2431679	0.036142465	0.144329897	99	0.042733767	0.090331956	0.024899368	-0.028288362
M12081	6A	2837436	0.036291158	0.350515464	99	0.042733767	0.090254202	0.072745711	0.082646959
M12607	6A	546961492	0.036291158	0.350515464	99	0.042733767	0.090254202	0.072745711	-0.082646959
M6731	3A	717015565	0.036291158	0.350515464	99	0.042733767	0.090254202	0.072745711	-0.082646959
M14065	6D	451750294	0.036347952	0.175257732	99	0.042733767	0.090224593	0.028341184	-0.032198635
M6635	3A	292579611	0.036376192	0.020618557	99	0.042733767	0.090209889	0.055375677	0.06291273
M10744	5B	360428929	0.036391963	0.092783505	99	0.042733767	0.090201682	0.028656231	0.032556563
M10515	5A	684647811	0.036396388	0.206185567	99	0.042733767	0.09019938	0.023239573	-0.026402656
M11986	5D	548463362	0.036506645	0.288659794	99	0.042733767	0.090142121	0.019598355	-0.022265841
M10817	5B	43437349	0.036590279	0.082474227	99	0.042733767	0.090098809	0.031661748	0.035971154
M10240	5A	534107889	0.036844486	0.371134021	99	0.042733767	0.08996781	0.051914885	0.058980898
M14939	7A	83447347	0.036844486	0.371134021	99	0.042733767	0.08996781	0.051914885	0.058980898
M14342	7A	0	0.036844486	0.371134021	99	0.042733767	0.08996781	0.051914885	-0.058980898
M7796	3B	508925402	0.036920153	0.206185567	99	0.042733767	0.089929004	0.020706657	0.023524991
M9980	5A	438355093	0.036994312	0.329896907	99	0.042733767	0.089891052	0.029025545	-0.032976143
M8416	3D	509421788	0.037041267	0.268041237	99	0.042733767	0.089867064	0.020162908	-0.022907234
M5769	2D	616636286	0.037045568	0.494845361	99	0.042733767	0.089864868	0.025113923	-0.02853212
M5277	2B	0	0.037056865	0.360824742	99	0.042733767	0.089859103	0.034239782	0.038900078
M1368	1B	392431722	0.037121238	0.041237113	99	0.042733767	0.089826284	0.040891148	-0.046456745
M3818	2B	99966648	0.037135582	0.24742268	99	0.042733767	0.08981898	0.024793129	0.028167663
M8431	3D	511265042	0.037177809	0.432989691	99	0.042733767	0.089797494	0.030089235	0.03418461
M7296	3B	67787098	0.03720269	0.412371134	99	0.042733767	0.089784846	0.024564929	0.027908403
M584	1A	0	0.03729206	0.340206186	99	0.042733767	0.089739489	0.073378621	0.083366012
M1110	1B	744753328	0.03735209	0.226804124	99	0.042733767	0.089709089	0.027297633	-0.03101305
M6979	3B	13535953	0.037490909	0.329896907	99	0.042733767	0.089638986	0.022856735	0.025967712
M15366	7B	458316341	0.037529488	0.432989691	99	0.042733767	0.089619554	0.031244598	-0.035497227
M12389	6A	473515887	0.037585067	0.371134021	99	0.042733767	0.089591595	0.0278185	-0.03160481
M2596	2A	73179749	0.037735233	0.041237113	99	0.042733767	0.089516275	0.03866762	0.043930579
M10782	5B	410537310	0.037858448	0.144329897	99	0.042733767	0.089454711	0.028424489	0.032293279
M15362	7B	159301016	0.037858448	0.144329897	99	0.042733767	0.089454711	0.028424489	-0.032293279
M12759	6A	595918169	0.037886837	0.340206186	99	0.042733767	0.089440557	0.023888824	-0.027140275
M9046	4A	658343323	0.0379953	0.206185567	99	0.042733767	0.089386585	0.026118626	-0.02967357
M14114	6D	0	0.03834282	0.134020619	99	0.042733767	0.089214754	0.028496109	0.032374647
M3624	2B	24266934	0.038574436	0.020618557	99	0.042733767	0.089101152	0.054153927	-0.06152469
M7273	3B	49148259	0.038636055	0.453608247	99	0.042733767	0.089071052	0.025419849	-0.028879684
M4685	2B	704429363	0.038666633	0.226804124	99	0.042733767	0.089056134	0.023134861	0.026283692
M3583	2B	40945523	0.038761558	0.298969072	99	0.042733767	0.089009904	0.021602144	0.024542361
M7804	3B	720217864	0.038786128	0.134020619	99	0.042733767	0.088997958	0.026159139	-0.029719598
M15404	7B	512354134	0.0387943	0.360824742	99	0.042733767	0.088993986	0.049811599	-0.056591338
M12599	6A	57659058	0.038838303	0.195876289	99	0.042733767	0.088972616	0.026180958	-0.029744386
M11546	5B	461255726	0.038960794	0.268041237	99	0.042733767	0.088913264	0.019663218	0.022339532
M3318	2A	795754294	0.039032961	0.164948454	99	0.042733767	0.088878389	0.024754059	0.028123275
M5620	2D	561930556	0.039061396	0.453608247	99	0.042733767	0.088864667	0.02668239	0.030314068
M11995	5D	548844664	0.039068041	0.391752577	99	0.042733767	0.088861462	0.019825785	-0.022524226
M12017	5D	553072577	0.039131199	0.216494845	99	0.042733767	0.088831026	0.02072012	-0.023540286
M5796	2D	744685545	0.039133723	0.309278351	99	0.042733767	0.088829811	0.021951307	0.024939048
M8647	4A	335898876	0.039139447	0.24742268	99	0.042733767	0.088827056	0.028619424	0.032514747
M8075	3B	590943948	0.039150537	0.391752577	99	0.042733767	0.088821718	0.023136116	0.026285118
M7568	3B	473703066	0.039256243	0.206185567	99	0.042733767	0.088770923	0.022833919	-0.02594179
M7831	3B	733356572	0.039284135	0.350515464	99	0.042733767	0.088757544	0.041309337	0.046931854
M8296	3D	17391691	0.039288881	0.350515464	99	0.042733767	0.088755269	0.024116651	0.027399111
M11239	5B	528687594	0.039337481	0.144329897	99	0.042733767	0.088731984	0.024498002	0.027832367
M6536	3A	646854667	0.039407409	0.206185567	99	0.042733767	0.088698536	0.027994664	0.031804952
M12543	6A	112907129	0.039458861	0.020618557	99	0.042733767	0.088673966	0.058814223	0.066819288
M7110	3B	22915822	0.039458861	0.020618557	99	0.042733767	0.088673966	0.058814223	0.066819288
M11475	5B	549587494	0.039458861	0.020618557	99	0.042733767	0.088673966	0.058814223	-0.066819288
M8594	4A	444907045	0.039494291	0.257731959	99	0.042733767	0.088657066	0.023388429	-0.026571773
M11499	5B	561713329	0.039529223	0.010309278	99	0.042733767	0.08864042	0.080936447	-0.091952516
M12151	6A	62668951	0.039655684	0.391752577	99	0.042733767	0.088580289	0.038628827	-0.043886506
M6709	3A	614087671	0.039669686	0.360824742	99	0.042733767	0.088573644	0.024896303	-0.02828488
M15047	7A	714340795	0.039744279	0.360824742	99	0.042733767	0.088538285	0.043217737	-0.049100001
M2991	2A	710105092	0.039950188	0.268041237	99	0.042733767	0.088441045	0.024068474	-0.027344377
M918	1B	57631009	0.039968612	0.350515464	99	0.042733767	0.088432371	0.054856638	-0.062323046
M3013	2A	706928677	0.040034263	0.24742268	99	0.042733767	0.088401495	0.020354989	0.023125459
M12059	6A	7901769	0.040036276	0.453608247	99	0.042733767	0.088400549	0.024400097	0.027721137
M13853	6D	1414317	0.040076135	0.412371134	99	0.042733767	0.088381831	0.021564779	-0.02449991
M1357	1B	7319459	0.040152364	0.164948454	99	0.042733767	0.088346088	0.024471203	-0.027801921
M5992	2D	641004884	0.040332523	0.195876289	99	0.042733767	0.088261902	0.022183137	0.025202431
M5852	2D	613237565	0.040352929	0.360824742	99	0.042733767	0.088252392	0.020884067	-0.023726549
M5636	2D	579196310	0.040408274	0.350515464	99	0.042733767	0.088226624	0.021252437	0.024145056
M1509	1B	561151613	0.040440361	0.319587629	99	0.042733767	0.088211702	0.02304469	-0.026181249
M8586	4A	716765921	0.040471745	0.319587629	99	0.042733767	0.08819712	0.02581633	-0.02933013
M10728	5B	283360444	0.040592277	0.18556701	99	0.042733767	0.088141226	0.022930435	0.026051443
M1092	1B	601178826	0.040626768	0.020618557	99	0.042733767	0.088125264	0.058499673	-0.066461926
M1158	1B	0	0.040626768	0.020618557	99	0.042733767	0.088125264	0.058499673	-0.066461926
M7374	3B	281007929	0.040644112	0.154639175	99	0.042733767	0.088117243	0.022824719	0.025931338
M11515	5B	562373770	0.040660879	0.494845361	99	0.042733767	0.088109493	0.02770002	0.031470204
M13615	6B	0	0.040763388	0.329896907	99	0.042733767	0.088062181	0.021396256	0.02430845
M5421	2D	33663900	0.040796158	0.206185567	99	0.042733767	0.088047084	0.023230242	0.026392055
M11122	5B	432995911	0.041078269	0.144329897	99	0.042733767	0.087917646	0.026868543	0.030525557
M6331	3A	144143324	0.041120769	0.18556701	99	0.042733767	0.087898228	0.030981144	0.035197914
M6733	3A	720487778	0.041147383	0.144329897	99	0.042733767	0.08788608	0.023917783	-0.027173177
M2271	1D	476709871	0.041175791	0.484536082	99	0.042733767	0.087873122	0.027199897	-0.030902011
M7270	3B	347855022	0.041222722	0.432989691	99	0.042733767	0.087851735	0.019630895	-0.02230281
M14106	6D	608662012	0.041223482	0.278350515	99	0.042733767	0.087851389	0.027024113	0.030702301
M8816	4A	0	0.041314473	0.206185567	99	0.042733767	0.087809999	0.025630018	0.029118459
M1668	1B	615019866	0.041326403	0.463917526	99	0.042733767	0.08780458	0.023477836	0.026673349
M12391	6A	149927104	0.041366469	0.268041237	99	0.042733767	0.087786391	0.025324171	0.028770984
M3648	2B	46670271	0.041415615	0.164948454	99	0.042733767	0.087764106	0.023076956	-0.026217906
M4664	2B	0	0.041503488	0.329896907	99	0.042733767	0.087724332	0.023999957	-0.027266534
M3663	2B	59764104	0.041508007	0.298969072	99	0.042733767	0.087722289	0.02459782	-0.027945772
M7905	3B	752073225	0.041550274	0.237113402	99	0.042733767	0.087703191	0.024969142	0.028367633
M6020	3A	9212189	0.04158058	0.144329897	99	0.042733767	0.087689511	0.027239445	0.030946941
M11587	5B	8998565	0.041617093	0.484536082	99	0.042733767	0.087673043	0.027024906	0.030703202
M8722	4A	36222671	0.0416219	0.103092784	99	0.042733767	0.087670876	0.029101559	-0.033062504
M3006	2A	709730810	0.041898672	0.257731959	99	0.042733767	0.087546562	0.020527053	0.023320941
M2789	2A	497439858	0.041967258	0.319587629	99	0.042733767	0.087515892	0.032123559	-0.036495821
M1074	1B	115279423	0.042017563	0.082474227	99	0.042733767	0.08749343	0.031400979	0.035674893
M12392	6A	149927104	0.042080273	0.360824742	99	0.042733767	0.087465471	0.02716571	0.030863171
M11568	5B	576916243	0.042181117	0.154639175	99	0.042733767	0.087420602	0.026394338	-0.029986809
M11004	5B	408219618	0.042251069	0.195876289	99	0.042733767	0.087389545	0.027646821	0.031409765
M14051	6D	665772921	0.042276484	0.391752577	99	0.042733767	0.087378276	0.040573226	0.046095552
M15279	7B	113767734	0.042392093	0.319587629	99	0.042733767	0.087327102	0.024019461	-0.027288693
M13085	6B	616736253	0.042451331	0.432989691	99	0.042733767	0.087300939	0.019956829	-0.022673106
M12958	6B	732212	0.042518857	0.082474227	99	0.042733767	0.087271162	0.031866191	0.036203423
M4229	2B	219214772	0.042739952	0.350515464	99	0.042733767	0.087174021	0.055801375	-0.063396369
M2859	2A	565262524	0.042759768	0.391752577	99	0.042733767	0.087165341	0.016813185	0.019101588
M11621	5B	481131215	0.042938239	0.391752577	99	0.042733767	0.087087357	0.022088381	-0.025094778
M4629	2B	427616803	0.042966679	0.453608247	99	0.042733767	0.087074962	0.02638268	-0.029973564
M9825	5A	0	0.043041929	0.412371134	99	0.042733767	0.087042208	0.022275877	0.025307795
M4819	2B	725608761	0.04311357	0.257731959	99	0.042733767	0.087011082	0.022311369	-0.025348116
M5380	2D	13833777	0.043265133	0.268041237	99	0.042733767	0.086945414	0.025214664	0.028646572
M8675	4A	232125986	0.043297459	0.360824742	99	0.042733767	0.086931441	0.028331734	0.0321879
M6462	3A	423845712	0.043320768	0.360824742	99	0.042733767	0.086921371	0.048477718	-0.055075906
M2834	2A	177899477	0.043345461	0.484536082	99	0.042733767	0.08691071	0.022569167	0.025641003
M14053	6D	228808098	0.043436717	0.422680412	99	0.042733767	0.086871369	0.02331459	-0.026487884
M6160	3A	316396454	0.043455937	0.164948454	99	0.042733767	0.086863094	0.023904129	-0.027157664
M7145	3B	24929087	0.043467364	0.381443299	99	0.042733767	0.086858176	0.047762441	-0.054263274
M3681	2B	628972455	0.043574727	0.422680412	99	0.042733767	0.086812039	0.032308075	-0.036705451
M6684	3A	294935009	0.043586805	0.103092784	99	0.042733767	0.086806856	0.027861487	0.031653649
M9838	5A	6179460	0.04365047	0.453608247	99	0.042733767	0.086779563	0.02792701	0.03172809
M10491	5A	662956259	0.043691293	0.164948454	99	0.042733767	0.086762084	0.028387529	-0.032251289
M15400	7B	0	0.043729143	0.422680412	99	0.042733767	0.086745894	0.030845386	0.035043679
M6756	3A	720367772	0.043775059	0.360824742	99	0.042733767	0.086726274	0.026059616	-0.029606529
M3696	2B	69066012	0.043835758	0.103092784	99	0.042733767	0.086700371	0.031901219	0.036243219
M13089	6B	37785946	0.043848598	0.443298969	99	0.042733767	0.086694896	0.028490688	-0.032368489
M10219	5A	511963606	0.043895499	0.051546392	99	0.042733767	0.086674914	0.038714286	-0.043983596
M10377	5A	569288642	0.043944874	0.432989691	99	0.042733767	0.086653902	0.025351226	-0.028801722
M11552	5B	562792380	0.043957292	0.237113402	99	0.042733767	0.086648621	0.021263311	0.02415741
M985	1B	60359807	0.043977013	0.360824742	99	0.042733767	0.086640238	0.057360602	-0.065167818
M3333	2A	794426530	0.044144551	0.298969072	99	0.042733767	0.086569186	0.020432771	-0.023213828
M12110	6A	5129073	0.044182873	0.360824742	99	0.042733767	0.086552974	0.043300002	-0.049193464
M11234	5B	527149386	0.044281204	0.195876289	99	0.042733767	0.086511445	0.028232199	0.032074818
M1524	1B	564653618	0.044419336	0.432989691	99	0.042733767	0.086453273	0.02262438	0.025703731
M7469	3B	222247260	0.044420281	0.319587629	99	0.042733767	0.086452875	0.022795855	-0.025898545
M10525	5A	698225850	0.044490394	0.134020619	99	0.042733767	0.086423423	0.027977067	0.031784959
M1192	1B	143362254	0.044528433	0.288659794	99	0.042733767	0.086407465	0.026600303	-0.030220807
M8793	4A	597887352	0.044689215	0.432989691	99	0.042733767	0.086340175	0.02198942	-0.024982349
M10659	5B	239258742	0.044739695	0.164948454	99	0.042733767	0.086319101	0.024461232	-0.027790592
M4159	2B	154633225	0.044818465	0.494845361	99	0.042733767	0.086286269	0.026373757	0.029963427
M8074	3B	790541416	0.044929943	0.360824742	99	0.042733767	0.086239909	0.020299192	-0.023062068
M14872	7A	682339108	0.0449417	0.474226804	99	0.042733767	0.086235026	0.026788215	0.030434295
M10166	5A	492826962	0.045057816	0.319587629	99	0.042733767	0.086186882	0.019605322	-0.022273756
M6016	2D	247051054	0.045105065	0.051546392	99	0.042733767	0.08616733	0.04508636	0.051222958
M11599	5B	683229885	0.045283181	0.216494845	99	0.042733767	0.086093819	0.020199341	0.022948625
M9432	4A	2055214	0.045323375	0.144329897	99	0.042733767	0.086077273	0.024795519	0.028170378
M2901	2A	476277816	0.045423868	0.381443299	99	0.042733767	0.086035974	0.021005481	-0.023864487
M12994	6B	17091004	0.045502304	0.010309278	99	0.042733767	0.086003808	0.073103062	-0.083052947
M3514	2B	26998820	0.045502304	0.010309278	99	0.042733767	0.086003808	0.073103062	-0.083052947
M10620	5B	63922089	0.045553675	0.412371134	99	0.042733767	0.085982773	0.028595288	-0.032487325
M15001	7A	714349760	0.045620463	0.381443299	99	0.042733767	0.085955464	0.047932877	0.054456907
M15412	7B	517623844	0.04563701	0.381443299	99	0.042733767	0.085948705	0.041436639	-0.047076482
M15303	7B	130505517	0.045707689	0.494845361	99	0.042733767	0.085919862	0.020489605	0.023278396
M10628	5B	29125387	0.045744274	0.381443299	99	0.042733767	0.085904951	0.020357393	0.02312819
M4123	2B	581433203	0.045842927	0.12371134	99	0.042733767	0.085864807	0.026896857	-0.030557725
M11348	5B	441021557	0.045970775	0.443298969	99	0.042733767	0.08581292	0.02767574	0.03144262
M5519	2D	74929509	0.046055318	0.402061856	99	0.042733767	0.085778693	0.020625804	-0.023433134
M8880	4A	678526678	0.046067834	0.350515464	99	0.042733767	0.085773632	0.024191978	0.027484691
M3139	2A	755679306	0.046224318	0.216494845	99	0.042733767	0.085710477	0.021492049	0.024417281
M8627	4A	428572127	0.046329895	0.453608247	99	0.042733767	0.085667997	0.021687	0.024638766
M736	1B	716071071	0.046372713	0.113402062	99	0.042733767	0.085650798	0.025075637	-0.028488623
M14553	7A	66446609	0.04640347	0.329896907	99	0.042733767	0.085638454	0.026546692	0.030159899
M1347	1B	498063961	0.046612217	0.360824742	99	0.042733767	0.085554909	0.039097312	0.044418754
M5020	2B	764544815	0.046787772	0.298969072	99	0.042733767	0.085484958	0.022089975	0.025096589
M15409	7B	542993770	0.04682093	0.453608247	99	0.042733767	0.085471778	0.030192329	0.034301735
M1499	1B	558561632	0.046856428	0.350515464	99	0.042733767	0.085457678	0.01777958	0.020199517
M10579	5B	0	0.046870504	0.164948454	99	0.042733767	0.085452091	0.022206357	0.025228812
M14598	7A	94404127	0.046915032	0.443298969	99	0.042733767	0.085434426	0.026225693	-0.02979521
M11198	5B	100027743	0.047120329	0.298969072	99	0.042733767	0.085353217	0.021362773	0.024270409
M2744	2A	188730587	0.047125622	0.175257732	99	0.042733767	0.085351129	0.026402688	0.029996295
M4840	2B	743076077	0.047148536	0.18556701	99	0.042733767	0.085342089	0.024847912	0.028229903
M14112	6D	470544254	0.047154279	0.484536082	99	0.042733767	0.085339825	0.027244042	0.030952164
M8382	3D	149912090	0.047374684	0.340206186	99	0.042733767	0.085253128	0.018887427	0.02145815
M7378	3B	130257859	0.047378108	0.371134021	99	0.042733767	0.085251785	0.022789387	-0.025891196
M6199	3A	486177257	0.047443801	0.474226804	99	0.042733767	0.08522603	0.022609404	0.025686716
M11438	5B	422432511	0.047455754	0.309278351	99	0.042733767	0.085221348	0.020497983	-0.023287915
M11314	5B	422210751	0.047538676	0.082474227	99	0.042733767	0.085188902	0.031238581	0.03549039
M2966	2A	705340913	0.047647642	0.072164948	99	0.042733767	0.085146358	0.029183871	-0.033156019
M13461	6B	616311748	0.047804755	0.030927835	99	0.042733767	0.085085199	0.043185069	-0.049062887
M6616	3A	683215818	0.047823294	0.06185567	99	0.042733767	0.085077996	0.033428702	-0.037978603
M4368	2B	459249657	0.047849364	0.103092784	99	0.042733767	0.085067873	0.034175248	-0.038826761
M3924	2B	147618275	0.048063518	0.453608247	99	0.042733767	0.08498494	0.02381046	0.027051246
M7283	3B	48788274	0.048141632	0.237113402	99	0.042733767	0.084954788	0.02337705	0.026558845
M5791	2D	723067435	0.048331158	0.422680412	99	0.042733767	0.08488185	0.029588913	-0.03361619
M5497	2D	74936166	0.048338066	0.484536082	99	0.042733767	0.084879197	0.019430269	0.022074878
M9256	4A	727965983	0.048485184	0.412371134	99	0.042733767	0.084822799	0.033007811	-0.037500427
M3369	2A	753091715	0.048485184	0.412371134	99	0.042733767	0.084822799	0.033007811	0.037500427
M11497	5B	802727205	0.048673464	0.226804124	99	0.042733767	0.08475089	0.021533942	0.024464876
M2786	2A	566856432	0.048693369	0.195876289	99	0.042733767	0.084743305	0.021495034	0.024420672
M8617	4A	134069682	0.048696584	0.391752577	99	0.042733767	0.08474208	0.035753806	-0.040620172
M6459	3A	564759853	0.048736191	0.484536082	99	0.042733767	0.084726999	0.023383779	0.02656649
M3830	2B	122927423	0.048767101	0.18556701	99	0.042733767	0.084715238	0.025674248	-0.029168709
M15498	7B	374288014	0.048933798	0.402061856	99	0.042733767	0.084651951	0.036745589	0.041746945
M11659	5B	18994764	0.048956874	0.154639175	99	0.042733767	0.084643209	0.025685278	0.02918124
M3989	2B	126899677	0.049017961	0.350515464	99	0.042733767	0.084620086	0.040108746	-0.045567853
M7068	3B	15205844	0.049076611	0.309278351	99	0.042733767	0.084597916	0.022741474	0.025836763
M13652	6B	0	0.049103809	0.237113402	99	0.042733767	0.084587645	0.024957843	-0.028354796
M503	1A	451630421	0.049164403	0.463917526	99	0.042733767	0.084564783	0.024605465	0.027954457
M14367	7A	20403281	0.049186408	0.206185567	99	0.042733767	0.084556488	0.02522904	-0.028662905
M14978	7A	824552561	0.0492226	0.154639175	99	0.042733767	0.084542853	0.02553101	0.029005976
M1129	1B	75840479	0.049288186	0.113402062	99	0.042733767	0.084518174	0.025562482	0.029041731
M13697	6B	713822686	0.049392978	0.226804124	99	0.042733767	0.084478814	0.022408861	0.025458878
M14549	7A	74674604	0.049466383	0.298969072	99	0.042733767	0.084451296	0.019793503	-0.02248755
M5979	2D	646461966	0.04950029	0.268041237	99	0.042733767	0.0844386	0.020354036	-0.023124376
M7201	3B	217469027	0.04957638	0.381443299	99	0.042733767	0.084410143	0.041769407	-0.047454542
M15363	7B	158543054	0.049674196	0.010309278	99	0.042733767	0.08437363	0.073326033	0.083306267
M2810	2A	551225257	0.049674196	0.010309278	99	0.042733767	0.08437363	0.073326033	-0.083306267
M8883	4A	629489184	0.049674196	0.010309278	99	0.042733767	0.08437363	0.073326033	-0.083306267
M8918	4A	649883746	0.049674196	0.010309278	99	0.042733767	0.08437363	0.073326033	-0.083306267
M14040	6D	421558768	0.049868202	0.154639175	99	0.042733767	0.084301439	0.025551771	0.029029562
M11512	5B	0	0.04990163	0.06185567	99	0.042733767	0.084289031	0.033342977	0.037881211
M12563	6A	537944558	0.050004851	0.206185567	99	0.042733767	0.084250772	0.019606835	-0.022275476
M6166	3A	412102912	0.050362838	0.381443299	99	0.042733767	0.084118739	0.020746573	0.02357034
M13727	6B	708271328	0.050374257	0.319587629	99	0.042733767	0.084114544	0.021005051	-0.023863999
M12060	6A	7901769	0.050403571	0.206185567	99	0.042733767	0.08410378	0.02102615	0.02388797
M7544	3B	392957146	0.050419694	0.484536082	99	0.042733767	0.084097863	0.023766325	-0.027001103
M10673	5B	353920901	0.050420426	0.319587629	99	0.042733767	0.084097594	0.022297802	-0.025332704
M4559	2B	0	0.050462365	0.226804124	99	0.042733767	0.084082211	0.025581095	-0.029062877
M7565	3B	6445656	0.050557985	0.051546392	99	0.042733767	0.084047189	0.037576488	-0.042690935
M2375	2A	10373140	0.050636997	0.474226804	99	0.042733767	0.084018304	0.024545384	0.027886199
M12982	6B	6682335	0.050663216	0.154639175	99	0.042733767	0.08400873	0.021247058	-0.024138945
M14222	7A	8870463	0.05078622	0.371134021	99	0.042733767	0.083963884	0.048302492	0.054876831
M14229	7A	12099978	0.05078622	0.371134021	99	0.042733767	0.083963884	0.048302492	0.054876831
M8129	3B	803849255	0.050862318	0.154639175	99	0.042733767	0.083936198	0.026764642	-0.030407514
M14093	6D	461923466	0.051036601	0.484536082	99	0.042733767	0.083872957	0.024823245	0.028201879
M8874	4A	45129083	0.05105026	0.329896907	99	0.042733767	0.083868011	0.023131261	0.026279603
M13120	6B	26195828	0.051097903	0.391752577	99	0.042733767	0.083850769	0.020956117	0.023808405
M11252	5B	441249939	0.051130743	0.113402062	99	0.042733767	0.083838894	0.029697367	0.033739405
M6995	3B	0	0.051154154	0.391752577	99	0.042733767	0.083830433	0.021216709	0.024104465
M10145	5A	485469964	0.051204491	0.474226804	99	0.042733767	0.083812256	0.017729703	-0.020142851
M4928	2B	619961495	0.051368024	0.381443299	99	0.042733767	0.083753336	0.019411553	-0.022053613
M922	1B	0	0.051384439	0.18556701	99	0.042733767	0.083747433	0.023336111	0.026512334
M1893	1B	674499667	0.051491351	0.474226804	99	0.042733767	0.083709035	0.028224105	0.032065621
M7230	3B	0	0.051530812	0.226804124	99	0.042733767	0.083694884	0.022336102	0.025376216
M12949	6A	682396885	0.051540331	0.216494845	99	0.042733767	0.083691472	0.020458792	0.02324339
M213	1A	293607657	0.051770964	0.391752577	99	0.042733767	0.083609015	0.018047108	-0.020503457
M7287	3B	50022030	0.051778214	0.443298969	99	0.042733767	0.08360643	0.022153583	-0.025168855
M8618	4A	134069682	0.051831548	0.309278351	99	0.042733767	0.083587421	0.027915628	-0.031715159
M8928	4A	659678759	0.051831548	0.309278351	99	0.042733767	0.083587421	0.027915628	-0.031715159
M11517	5B	715223883	0.051856185	0.288659794	99	0.042733767	0.083578647	0.024222554	-0.027519429
M3276	2A	768676643	0.051859231	0.144329897	99	0.042733767	0.083577562	0.025693423	0.029190495
M4884	2B	589523538	0.051874206	0.237113402	99	0.042733767	0.083572232	0.025534209	0.02900961
M8881	4A	632945628	0.052111208	0.24742268	99	0.042733767	0.083488089	0.021233629	-0.024123688
M15361	7B	159301016	0.052134531	0.474226804	99	0.042733767	0.083479831	0.02633622	-0.029920781
M7698	3B	669426645	0.052154006	0.360824742	99	0.042733767	0.083472939	0.041850356	0.04754651
M2106	1D	272756814	0.052169074	0.412371134	99	0.042733767	0.083467608	0.023723682	0.026952656
M5564	2D	586893685	0.052237707	0.360824742	99	0.042733767	0.083443347	0.022779496	-0.025879959
M14852	7A	676966338	0.052274374	0.195876289	99	0.042733767	0.083430399	0.020373098	0.023146033
M8141	3B	810546510	0.052360769	0.494845361	99	0.042733767	0.083399932	0.024931885	0.028325305
M14119	6D	472359420	0.052377428	0.298969072	99	0.042733767	0.083394063	0.017613142	0.020010425
M2306	1D	0	0.05238603	0.309278351	99	0.042733767	0.083391033	0.020228926	0.022982237
M3966	2B	165049205	0.052429138	0.432989691	99	0.042733767	0.083375859	0.025099822	0.028516099
M3798	2B	262262279	0.052451481	0.391752577	99	0.042733767	0.083368	0.01938726	0.022026014
M5836	2D	587202661	0.052594465	0.422680412	99	0.042733767	0.083317788	0.018702323	-0.021247852
M10568	5B	11773089	0.052684985	0.474226804	99	0.042733767	0.083286076	0.027916163	-0.031715766
M1146	1B	37570116	0.052876699	0.175257732	99	0.042733767	0.083219106	0.023601777	0.026814159
M13138	6B	77458408	0.053272239	0.175257732	99	0.042733767	0.083081757	0.021905214	-0.024886681
M6266	3A	0	0.053290771	0.494845361	99	0.042733767	0.083075349	0.031143067	-0.035381876
M1929	1B	0	0.053309663	0.18556701	99	0.042733767	0.083068819	0.022192128	0.025212647
M6444	3A	0	0.053589578	0.329896907	99	0.042733767	0.082972356	0.020859777	0.023698952
M8906	4A	54759330	0.0536378	0.474226804	99	0.042733767	0.082955792	0.022894292	0.02601038
M10415	5A	577226879	0.053646371	0.391752577	99	0.042733767	0.08295285	0.020448523	-0.023231723
M5050	2B	442156608	0.053894864	0.402061856	99	0.042733767	0.082867766	0.023869237	0.027118023
M13836	6B	0	0.053904859	0.278350515	99	0.042733767	0.082864353	0.017683164	-0.020089978
M7186	3B	825539318	0.053954219	0.360824742	99	0.042733767	0.082847505	0.019502224	0.022156626
M13829	6B	470111441	0.054156298	0.226804124	99	0.042733767	0.082778707	0.022202239	-0.025224133
M14916	7A	699146276	0.054395656	0.422680412	99	0.042733767	0.082697573	0.031250517	-0.035503951
M8666	4A	125344732	0.054414392	0.329896907	99	0.042733767	0.082691238	0.047781343	-0.054284749
M7367	3B	134220980	0.054624944	0.422680412	99	0.042733767	0.082620212	0.027671488	-0.031437789
M2826	2A	502632405	0.054706753	0.103092784	99	0.042733767	0.082592696	0.024069515	0.02734556
M9255	4A	727965983	0.054708361	0.453608247	99	0.042733767	0.082592155	0.027944239	0.031747664
M5683	2D	0	0.054745038	0.391752577	99	0.042733767	0.082579834	0.01808525	0.020546791
M12693	6A	611545509	0.054801605	0.412371134	99	0.042733767	0.082560847	0.025562522	-0.029041776
M5370	2D	163295386	0.054926405	0.288659794	99	0.042733767	0.082519033	0.023907977	-0.027162036
M11591	5B	680236004	0.055005113	0.360824742	99	0.042733767	0.082492715	0.018885869	-0.02145638
M3652	2B	53458522	0.055020878	0.309278351	99	0.042733767	0.082487448	0.016921692	-0.019224863
M11394	5B	640904984	0.055030618	0.12371134	99	0.042733767	0.082484195	0.022673073	-0.025759052
M12086	6A	107264253	0.055042035	0.381443299	99	0.042733767	0.082480383	0.021440803	0.02435906
M13625	6B	687021610	0.05518996	0.381443299	99	0.042733767	0.082431065	0.018878665	-0.021448196
M998	1B	41982366	0.05519378	0.154639175	99	0.042733767	0.082429794	0.021714225	-0.024669696
M10948	5B	526239910	0.055198569	0.082474227	99	0.042733767	0.0824282	0.034087142	0.038726662
M5624	2D	490049382	0.055232273	0.113402062	99	0.042733767	0.082416985	0.025599228	0.029083478
M11603	5B	686004162	0.055258523	0.206185567	99	0.042733767	0.082408255	0.020921277	0.023768823
M657	1A	583529682	0.05535966	0.371134021	99	0.042733767	0.082374664	0.037408705	-0.042500316
M14993	7A	708846607	0.055424809	0.113402062	99	0.042733767	0.08235306	0.0232582	0.026423818
M8240	3B	828421182	0.055428476	0.474226804	99	0.042733767	0.082351845	0.024853761	0.028236547
M11251	5B	441249939	0.055438056	0.422680412	99	0.042733767	0.082348671	0.032837074	0.037306451
M13042	6B	0	0.055526167	0.041237113	99	0.042733767	0.082319504	0.037809075	0.042955179
M1081	1B	85287651	0.055550308	0.175257732	99	0.042733767	0.082311522	0.024614388	-0.027964594
M5022	2B	593348369	0.055552522	0.309278351	99	0.042733767	0.08231079	0.025156706	-0.028580726
M13730	6B	708271328	0.05564048	0.319587629	99	0.042733767	0.082281739	0.022757497	0.025854966
M14383	7A	0	0.055652558	0.340206186	99	0.042733767	0.082277753	0.074607515	-0.084762168
M14415	7A	33761756	0.055652558	0.340206186	99	0.042733767	0.082277753	0.074607515	-0.084762168
M14327	7A	0	0.055652558	0.340206186	99	0.042733767	0.082277753	0.074607515	0.084762168
M8127	3B	596885708	0.055712853	0.381443299	99	0.042733767	0.082257872	0.020258877	0.023016265
M4099	2B	419320938	0.055875342	0.350515464	99	0.042733767	0.082204409	0.051103486	-0.058059061
M8891	4A	668288144	0.055935686	0.453608247	99	0.042733767	0.082184597	0.024776891	0.028149215
M9185	4A	712151623	0.055975225	0.371134021	99	0.042733767	0.082171628	0.0199982	-0.022720108
M5152	2B	0	0.056095186	0.18556701	99	0.042733767	0.082132342	0.021049283	0.023914251
M4816	2B	732342408	0.056200547	0.237113402	99	0.042733767	0.082097911	0.023043565	-0.02617997
M6500	3A	533037386	0.056291986	0.329896907	99	0.042733767	0.082068086	0.018031764	-0.020486025
M9966	5A	380823807	0.056311121	0.030927835	99	0.042733767	0.082061852	0.042949472	0.048795224
M15253	7B	63002454	0.056317905	0.340206186	99	0.042733767	0.082059642	0.025220974	0.028653741
M6757	3A	338240084	0.056328799	0.381443299	99	0.042733767	0.082056094	0.028543314	0.032428277
M3627	2B	419250140	0.056514839	0.402061856	99	0.042733767	0.081995617	0.036085615	0.040997143
M5161	2B	381376204	0.056547575	0.298969072	99	0.042733767	0.081984997	0.020758279	-0.02358364
M8535	4A	17889469	0.056597999	0.278350515	99	0.042733767	0.081968653	0.028287182	-0.032137284
M2832	2A	554520335	0.05661599	0.12371134	99	0.042733767	0.081962825	0.022145255	-0.025159393
M5853	2D	722804527	0.056669032	0.350515464	99	0.042733767	0.081945655	0.021306431	-0.024206399
M10367	5A	689204261	0.056671087	0.257731959	99	0.042733767	0.08194499	0.019204841	0.021818767
M13899	6D	16512596	0.056727129	0.319587629	99	0.042733767	0.081926869	0.025317921	-0.028763884
M13739	6B	712074218	0.05676981	0.391752577	99	0.042733767	0.08191308	0.024646317	-0.028000869
M11614	5B	590678073	0.056844673	0.371134021	99	0.042733767	0.081888923	0.017551238	0.019940096
M6037	3A	488385956	0.05693366	0.443298969	99	0.042733767	0.081860252	0.026293816	-0.029872605
M3996	2B	0	0.056960252	0.443298969	99	0.042733767	0.081851693	0.021173819	0.024055738
M419	1A	235956432	0.056987456	0.391752577	99	0.042733767	0.081842943	0.019377603	-0.022015043
M513	1A	544430459	0.056994301	0.494845361	99	0.042733767	0.081840741	0.020515299	-0.023307588
M9430	4A	439294228	0.057014416	0.226804124	99	0.042733767	0.081834275	0.026735116	-0.03037397
M5840	2D	571920602	0.05702384	0.164948454	99	0.042733767	0.081831246	0.023438872	-0.026629081
M8402	3D	289698787	0.057047428	0.072164948	99	0.042733767	0.081823667	0.032209541	0.036593505
M8524	3D	612028308	0.057150059	0.237113402	99	0.042733767	0.081790731	0.023801679	0.027041269
M11769	5B	683000490	0.057155812	0.288659794	99	0.042733767	0.081788887	0.02300202	-0.026132771
M3003	2A	0	0.057165056	0.350515464	99	0.042733767	0.081785924	0.017642177	-0.020043412
M9485	4B	103551390	0.057212267	0.484536082	99	0.042733767	0.081770799	0.020517651	-0.02331026
M14076	6D	453651676	0.057259165	0.391752577	99	0.042733767	0.081755788	0.019760199	0.022449713
M2594	2A	75591116	0.057380772	0.268041237	99	0.042733767	0.081716925	0.017580876	-0.019973767
M11219	5B	628455006	0.057425539	0.226804124	99	0.042733767	0.081702641	0.024075194	0.027352012
M1518	1B	562303250	0.057484405	0.329896907	99	0.042733767	0.081683876	0.017241243	0.019587908
M620	1A	579302653	0.057665038	0.082474227	99	0.042733767	0.081626426	0.034043444	-0.038677017
M13772	6B	0	0.057691394	0.216494845	99	0.042733767	0.08161806	0.01867461	0.021216367
M10555	5B	9243036	0.057699962	0.195876289	99	0.042733767	0.081615341	0.025562897	0.029042203
M14009	6D	135430800	0.057863454	0.350515464	99	0.042733767	0.081563544	0.024558082	-0.027900624
M10360	5A	567120979	0.057909232	0.030927835	99	0.042733767	0.081549069	0.045372029	-0.051547509
M6239	3A	465870969	0.057953344	0.309278351	99	0.042733767	0.081535132	0.033287554	-0.037818245
M12804	6A	602916054	0.057980322	0.216494845	99	0.042733767	0.081526615	0.026218636	-0.029787192
M2092	1D	612756863	0.058001478	0.432989691	99	0.042733767	0.081519938	0.028515491	0.032396668
M4318	2B	386107660	0.058079481	0.381443299	99	0.042733767	0.081495345	0.028958304	0.03289975
M13715	6B	0	0.058151165	0.453608247	99	0.042733767	0.081472775	0.024830921	-0.028210599
M7183	3B	30016583	0.058156208	0.443298969	99	0.042733767	0.081471188	0.016696813	0.018969377
M5588	2D	29408508	0.058393229	0.288659794	99	0.042733767	0.081396782	0.022954031	-0.026078249
M12680	6A	473088634	0.058395799	0.329896907	99	0.042733767	0.081395977	0.022694314	-0.025783183
M10754	5B	388587448	0.058436233	0.237113402	99	0.042733767	0.081383317	0.02365675	0.026876615
M7384	3B	714302155	0.05863081	0.195876289	99	0.042733767	0.081322527	0.01920676	-0.021820946
M15177	7B	23321358	0.058686088	0.216494845	99	0.042733767	0.081305296	0.01848228	0.02099786
M3503	2B	24847422	0.058690303	0.484536082	99	0.042733767	0.081303983	0.016352296	-0.018577969
M7025	3B	15100130	0.058702509	0.432989691	99	0.042733767	0.081300181	0.017968395	0.02041403
M13481	6B	631782578	0.058722474	0.474226804	99	0.042733767	0.081293964	0.024801123	0.028176745
M5781	2D	611125588	0.058833032	0.443298969	99	0.042733767	0.081259579	0.020056541	-0.022786389
M7506	3B	130253586	0.0588674	0.257731959	99	0.042733767	0.081248904	0.020714979	0.023534446
M14976	7A	711824297	0.05893731	0.12371134	99	0.042733767	0.08122721	0.030809828	0.035003281
M3896	2B	118063648	0.058941119	0.175257732	99	0.042733767	0.081226029	0.021366015	-0.024274093
M3466	2B	9755482	0.059046711	0.309278351	99	0.042733767	0.081193318	0.021382408	-0.024292717
M4378	2B	649670177	0.059100149	0.206185567	99	0.042733767	0.081176788	0.022578337	0.025651422
M5607	2D	14343154	0.059126767	0.12371134	99	0.042733767	0.08116856	0.024094931	-0.027374435
M10465	5A	0	0.059151601	0.474226804	99	0.042733767	0.081160887	0.026488674	0.030093985
M11246	5B	425841296	0.059158309	0.113402062	99	0.042733767	0.081158815	0.028814856	0.032736778
M1003	1B	95344234	0.059365108	0.443298969	99	0.042733767	0.081095065	0.017548299	-0.019936757
M7919	3B	749485203	0.059365303	0.494845361	99	0.042733767	0.081095005	0.025211128	-0.028642555
M9506	4B	449189961	0.059397432	0.371134021	99	0.042733767	0.081085122	0.015692342	0.017828189
M3353	2A	766445675	0.059406342	0.350515464	99	0.042733767	0.081082382	0.056861911	-0.064601251
M3887	2B	0	0.059406342	0.350515464	99	0.042733767	0.081082382	0.056861911	-0.064601251
M12491	6A	440255570	0.059474753	0.092783505	99	0.042733767	0.081061362	0.029067824	-0.033024177
M2287	1D	0	0.059485203	0.412371134	99	0.042733767	0.081058153	0.017555632	0.019945088
M15099	7A	720585870	0.059506929	0.164948454	99	0.042733767	0.081051484	0.027119224	-0.030810358
M4556	2B	559193945	0.05972273	0.453608247	99	0.042733767	0.080985385	0.022398715	-0.025447352
M10777	5B	398715853	0.059742114	0.402061856	99	0.042733767	0.08097946	0.021564438	-0.024499522
M6583	3A	660013848	0.059749664	0.134020619	99	0.042733767	0.080977153	0.022517935	0.025582798
M7255	3B	45197552	0.059843818	0.422680412	99	0.042733767	0.080948409	0.02073599	0.023558317
M7369	3B	147720127	0.059874756	0.443298969	99	0.042733767	0.080938974	0.025478095	0.028945859
M10312	5A	0	0.059895751	0.381443299	99	0.042733767	0.080932575	0.020192239	-0.022940557
M14263	7A	0	0.059933333	0.422680412	99	0.042733767	0.080921126	0.019506203	-0.022161146
M14977	7A	824552561	0.059959308	0.443298969	99	0.042733767	0.080913218	0.032080436	0.036446829
M12507	6A	252993747	0.060006447	0.329896907	99	0.042733767	0.080898875	0.021926848	0.02491126
M8113	3B	720851922	0.060114738	0.443298969	99	0.042733767	0.080865972	0.02567061	-0.029164576
M7193	3B	35451949	0.06015057	0.350515464	99	0.042733767	0.080855099	0.016528512	-0.018778169
M10870	5B	481174569	0.060185679	0.082474227	99	0.042733767	0.080844452	0.032428556	-0.036842331
M8342	3D	37969599	0.060197577	0.154639175	99	0.042733767	0.080840846	0.026275244	0.029851506
M7184	3B	30016583	0.060206058	0.432989691	99	0.042733767	0.080838275	0.01673186	-0.019009194
M11142	5B	415747285	0.060295189	0.350515464	99	0.042733767	0.080811286	0.017493934	-0.019874993
M790	1B	634798060	0.060320535	0.371134021	99	0.042733767	0.080803619	0.035978434	-0.040875374
M9723	4D	1206063	0.060477387	0.422680412	99	0.042733767	0.080756251	0.016943196	-0.019249295
M7228	3B	38809070	0.060574383	0.103092784	99	0.042733767	0.080727025	0.02525587	-0.028693387
M2265	1D	482503736	0.060577766	0.463917526	99	0.042733767	0.080726006	0.020307252	-0.023071224
M10602	5B	28880693	0.060591958	0.18556701	99	0.042733767	0.080721735	0.022786104	0.025887467
M15064	7A	715784906	0.060630432	0.06185567	99	0.042733767	0.08071016	0.035540327	-0.040377637
M13363	6B	438945063	0.060634283	0.268041237	99	0.042733767	0.080709001	0.022150115	-0.025164915
M4748	2B	147968189	0.060713156	0.144329897	99	0.042733767	0.080685299	0.022910518	-0.026028814
M5594	2D	708346816	0.060778708	0.329896907	99	0.042733767	0.080665625	0.019518409	-0.022175013
M13313	6B	452530948	0.060820671	0.494845361	99	0.042733767	0.080653042	0.024781358	-0.02815429
M7116	3B	20952119	0.060865869	0.134020619	99	0.042733767	0.080639501	0.025341417	-0.028790577
M12807	6A	689032602	0.06119056	0.494845361	99	0.042733767	0.080542539	0.025694516	0.029191737
M11006	5B	481080959	0.061271301	0.319587629	99	0.042733767	0.080518514	0.01858295	-0.021112231
M9986	5A	72230055	0.061404808	0.206185567	99	0.042733767	0.080478864	0.022100797	0.025108884
M10524	5A	691793389	0.061499224	0.206185567	99	0.042733767	0.080450879	0.022898202	0.026014823
M14669	7A	148468027	0.06155562	0.494845361	99	0.042733767	0.080434185	0.02383413	0.027078138
M13881	6D	452928272	0.061625117	0.278350515	99	0.042733767	0.080413637	0.023376658	-0.0265584
M7486	3B	495521725	0.061632329	0.329896907	99	0.042733767	0.080411506	0.049729361	-0.056497907
M15002	7A	714349760	0.061913152	0.350515464	99	0.042733767	0.080328739	0.022224762	-0.025249722
M10884	5B	520209151	0.062036791	0.309278351	99	0.042733767	0.080292428	0.020664319	-0.023476891
M15113	7A	623342327	0.06213541	0.113402062	99	0.042733767	0.080263521	0.031806857	0.036136014
M4843	2B	722631240	0.062177688	0.453608247	99	0.042733767	0.080251143	0.021696959	0.024650081
M3884	2B	133979532	0.062212097	0.113402062	99	0.042733767	0.080241077	0.022707193	-0.025797815
M4488	2B	577540966	0.062241702	0.134020619	99	0.042733767	0.08023242	0.026930898	-0.030596398
M169	1A	2874382	0.06224284	0.402061856	99	0.042733767	0.080232087	0.024589113	0.027935879
M11201	5B	416173952	0.062272101	0.463917526	99	0.042733767	0.080223536	0.027040651	-0.03072109
M6921	3B	5973349	0.062275834	0.206185567	99	0.042733767	0.080222445	0.022880457	0.025994662
M2969	2A	703879878	0.06251046	0.051546392	99	0.042733767	0.080154039	0.033366312	-0.037907722
M14050	6D	217317992	0.062512697	0.391752577	99	0.042733767	0.080153388	0.020562541	-0.023361259
M11518	5B	715223883	0.062605868	0.494845361	99	0.042733767	0.080126301	0.023593521	-0.026804779
M13962	6D	34075472	0.06262238	0.298969072	99	0.042733767	0.080121506	0.024797461	0.028172585
M5649	2D	744783890	0.06268043	0.144329897	99	0.042733767	0.080104656	0.023273414	0.026441104
M7853	3B	302427239	0.062713164	0.010309278	99	0.042733767	0.080095163	0.074827012	-0.08501154
M13737	6B	611901303	0.062713164	0.010309278	99	0.042733767	0.080095163	0.074827012	0.08501154
M2194	1D	421863618	0.062713164	0.010309278	99	0.042733767	0.080095163	0.074827012	0.08501154
M7814	3B	549104307	0.062713164	0.010309278	99	0.042733767	0.080095163	0.074827012	0.08501154
M7826	3B	464837996	0.062713164	0.010309278	99	0.042733767	0.080095163	0.074827012	0.08501154
M7828	3B	552530358	0.062713164	0.010309278	99	0.042733767	0.080095163	0.074827012	0.08501154
M7838	3B	441570426	0.062713164	0.010309278	99	0.042733767	0.080095163	0.074827012	0.08501154
M1188	1B	444058473	0.062830044	0.051546392	99	0.042733767	0.080061308	0.030184832	0.034293218
M6913	3B	3064404	0.062839533	0.443298969	99	0.042733767	0.080058563	0.021605246	0.024545885
M6241	3A	24744356	0.062855038	0.443298969	99	0.042733767	0.080054078	0.024294497	-0.027601163
M7433	3B	199675977	0.062946689	0.494845361	99	0.042733767	0.08002759	0.01666101	-0.018928701
M1577	1B	420600926	0.062951007	0.257731959	99	0.042733767	0.080026343	0.019397712	0.022037889
M7500	3B	248342512	0.062999667	0.381443299	99	0.042733767	0.080012298	0.035361057	-0.040173967
M5554	2D	412255620	0.063017247	0.371134021	99	0.042733767	0.080007227	0.022178726	-0.02519742
M3737	2B	44609696	0.063019538	0.010309278	99	0.042733767	0.080006566	0.068509315	0.077833957
M5107	2B	0	0.063019538	0.010309278	99	0.042733767	0.080006566	0.068509315	-0.077833957
M5170	2B	598295117	0.063120665	0.412371134	99	0.042733767	0.079977425	0.0200764	-0.022808952
M9929	5A	81414626	0.063238393	0.371134021	99	0.042733767	0.079943563	0.015805381	-0.017956614
M9998	5A	69102517	0.063284868	0.154639175	99	0.042733767	0.079930215	0.020598658	0.023402293
M7309	3B	537220619	0.063300883	0.422680412	99	0.042733767	0.079925618	0.02338648	0.026569558
M9509	4B	481237158	0.063322598	0.175257732	99	0.042733767	0.079919386	0.021142552	-0.024020215
M3723	2B	149684945	0.063360229	0.371134021	99	0.042733767	0.079908592	0.041949651	-0.047659319
M4135	2B	347472378	0.063360229	0.371134021	99	0.042733767	0.079908592	0.041949651	-0.047659319
M12473	6A	424016956	0.063421492	0.432989691	99	0.042733767	0.079891036	0.016638305	-0.018902906
M3653	2B	53458522	0.063453764	0.453608247	99	0.042733767	0.079881794	0.01763391	-0.02003402
M3019	2A	716906689	0.063489417	0.463917526	99	0.042733767	0.079871591	0.017630286	-0.020029902
M4017	2B	535286874	0.063639843	0.030927835	99	0.042733767	0.079828609	0.042923932	-0.048766207
M11578	5B	581759209	0.063698407	0.453608247	99	0.042733767	0.079811905	0.02455725	-0.027899679
M5422	2D	33663900	0.06369913	0.206185567	99	0.042733767	0.079811699	0.020409862	-0.0231878
M728	1B	3164636	0.063736885	0.278350515	99	0.042733767	0.079800939	0.018361201	0.0208603
M5088	2B	770053999	0.063841575	0.051546392	99	0.042733767	0.07977114	0.038257246	0.043464349
M12077	6A	4290482	0.063924873	0.391752577	99	0.042733767	0.079747467	0.03449487	-0.039189885
M12079	6A	4290482	0.063924873	0.391752577	99	0.042733767	0.079747467	0.03449487	-0.039189885
M14108	6D	463784578	0.063961927	0.484536082	99	0.042733767	0.079736948	0.023204678	-0.026363011
M6068	3A	12479120	0.063975082	0.051546392	99	0.042733767	0.079733215	0.036404933	0.041359922
M2285	1D	0	0.064029698	0.484536082	99	0.042733767	0.079717725	0.021569091	-0.024504809
M6876	3A	749184747	0.064068336	0.041237113	99	0.042733767	0.079706775	0.044779689	0.050874547
M8669	4A	633786590	0.064122529	0.350515464	99	0.042733767	0.07969143	0.024141129	-0.027426921
M5420	2D	20323802	0.064123556	0.072164948	99	0.042733767	0.079691139	0.028474424	-0.032350011
M15030	7A	0	0.064166142	0.474226804	99	0.042733767	0.07967909	0.020989773	0.023846641
M7190	3B	692937796	0.064246959	0.072164948	99	0.042733767	0.079656248	0.030921176	0.035129784
M7406	3B	254434778	0.064394329	0.144329897	99	0.042733767	0.079614676	0.019997376	0.022719172
M1139	1B	57477371	0.064409154	0.030927835	99	0.042733767	0.0796105	0.040169615	-0.045637006
M10954	5B	518835133	0.064459032	0.463917526	99	0.042733767	0.079596456	0.017829921	-0.02025671
M10742	5B	356684358	0.064467366	0.319587629	99	0.042733767	0.079594111	0.059310996	-0.067383676
M7179	3B	473206821	0.06461429	0.06185567	99	0.042733767	0.079552818	0.032936991	0.037419967
M8294	3D	17391691	0.06465567	0.463917526	99	0.042733767	0.079541207	0.016761918	0.019043343
M10937	5B	329694203	0.064759612	0.371134021	99	0.042733767	0.079512076	0.023191045	-0.026347524
M2122	1D	4811197	0.064832933	0.195876289	99	0.042733767	0.079491557	0.024436335	-0.027762307
M7343	3B	70108166	0.064866846	0.06185567	99	0.042733767	0.079482075	0.036652692	0.041641404
M8258	3D	6677623	0.064882642	0.371134021	99	0.042733767	0.079477661	0.022735411	-0.025829875
M4248	2B	483838235	0.064884157	0.175257732	99	0.042733767	0.079477237	0.020203974	0.022953889
M14024	6D	357593819	0.064898961	0.484536082	99	0.042733767	0.079473101	0.024051633	-0.027325244
M1923	1B	681077207	0.064926126	0.412371134	99	0.042733767	0.079465514	0.031334153	0.03559897
M9102	4A	695118747	0.064937346	0.030927835	99	0.042733767	0.079462381	0.045449268	-0.051635261
M3012	2A	568309420	0.065080533	0.24742268	99	0.042733767	0.079422453	0.019265704	0.021887913
M3828	2B	116410710	0.065212228	0.412371134	99	0.042733767	0.079385814	0.018647006	0.021185006
M8094	3B	803512428	0.065241326	0.092783505	99	0.042733767	0.079377729	0.02840212	-0.032267866
M5175	2B	0	0.065325468	0.484536082	99	0.042733767	0.079354373	0.017583742	-0.019977023
M14279	7A	13884507	0.06532893	0.144329897	99	0.042733767	0.079353413	0.020138523	0.02287953
M6125	3A	19895266	0.065350225	0.443298969	99	0.042733767	0.079347507	0.026445409	-0.030044831
M3373	2A	646343478	0.065369165	0.309278351	99	0.042733767	0.079342257	0.029410648	-0.033413662
M3801	2B	456534362	0.065540783	0.381443299	99	0.042733767	0.079294754	0.020646795	-0.023456982
M1462	1B	543486036	0.065641684	0.443298969	99	0.042733767	0.079266889	0.017210162	-0.019552597
M3339	2A	766578300	0.065736193	0.319587629	99	0.042733767	0.079240831	0.0304391	0.034582094
M7683	3B	620760256	0.065744872	0.474226804	99	0.042733767	0.07923844	0.020773854	-0.023601335
M181	1A	344675281	0.065785632	0.412371134	99	0.042733767	0.079227216	0.017456217	-0.019832142
M7551	3B	473710563	0.065924106	0.113402062	99	0.042733767	0.079189141	0.024024038	0.027293893
M4145	2B	184403011	0.065973126	0.463917526	99	0.042733767	0.079175682	0.029263835	0.033246866
M9390	4A	732814470	0.066051358	0.103092784	99	0.042733767	0.079154227	0.027167918	0.030865679
M12040	6A	49592914	0.066063261	0.164948454	99	0.042733767	0.079150965	0.023225254	-0.026386388
M10585	5B	576692587	0.066117833	0.329896907	99	0.042733767	0.079136018	0.050917458	-0.057847713
M8815	4A	0	0.066193648	0.072164948	99	0.042733767	0.079115274	0.028197581	-0.032035487
M6643	3A	420552380	0.066209043	0.412371134	99	0.042733767	0.079111065	0.016746115	-0.019025389
M4036	2B	159489976	0.06623963	0.030927835	99	0.042733767	0.079102706	0.037002194	-0.042038475
M8220	3B	825858484	0.066331724	0.103092784	99	0.042733767	0.079077562	0.026201634	0.029767876
M10517	5A	685961373	0.066339582	0.329896907	99	0.042733767	0.079075418	0.031819171	-0.036150003
M7176	3B	28804833	0.066435829	0.484536082	99	0.042733767	0.079049184	0.015219193	-0.017290641
M9310	4A	719934001	0.066448074	0.268041237	99	0.042733767	0.07904585	0.017866127	0.020297843
M15306	7B	113572118	0.066464495	0.319587629	99	0.042733767	0.079041379	0.019587607	0.02225363
M10086	5A	470186523	0.066504684	0.030927835	99	0.042733767	0.079030442	0.051771551	0.058818055
M13508	6B	502906219	0.066504684	0.030927835	99	0.042733767	0.079030442	0.051771551	0.058818055
M14211	7A	10884688	0.066504684	0.030927835	99	0.042733767	0.079030442	0.051771551	0.058818055
M10814	5B	412452755	0.066504684	0.030927835	99	0.042733767	0.079030442	0.051771551	-0.058818055
M14292	7A	16302848	0.066504684	0.030927835	99	0.042733767	0.079030442	0.051771551	-0.058818055
M7765	3B	728080758	0.066504684	0.030927835	99	0.042733767	0.079030442	0.051771551	-0.058818055
M10696	5B	301511831	0.066716317	0.041237113	99	0.042733767	0.078972967	0.040438232	-0.045942184
M10497	5A	495979375	0.066739912	0.195876289	99	0.042733767	0.078966572	0.022053926	0.025055633
M6682	3A	710340945	0.066862712	0.412371134	99	0.042733767	0.078933326	0.026372179	0.029961634
M3142	2A	755679306	0.067200669	0.268041237	99	0.042733767	0.07884217	0.01577513	0.017922246
M9795	4D	481893268	0.06721101	0.12371134	99	0.042733767	0.078839389	0.022659622	-0.025743769
M2903	2A	502932671	0.067235785	0.412371134	99	0.042733767	0.078832727	0.017301223	0.019656052
M8999	4A	642951900	0.067267623	0.195876289	99	0.042733767	0.07882417	0.018851158	-0.021416945
M7316	3B	55092506	0.067281228	0.257731959	99	0.042733767	0.078820515	0.021728474	0.024685885
M6904	3B	2102404	0.067284078	0.268041237	99	0.042733767	0.078819749	0.017007907	-0.019322813
M8645	4A	413875836	0.067323086	0.371134021	99	0.042733767	0.078809274	0.022551578	0.02562102
M11721	5B	657411744	0.067547181	0.484536082	99	0.042733767	0.078749224	0.028341864	-0.032199409
M8889	4A	747299239	0.067751639	0.484536082	99	0.042733767	0.078694624	0.022453557	0.025509658
M10638	5B	47286882	0.067870805	0.432989691	99	0.042733767	0.078662883	0.028626522	0.032522811
M9944	5A	632673082	0.068045172	0.237113402	99	0.042733767	0.078616549	0.023143909	0.026293972
M10549	5B	17888082	0.068069517	0.278350515	99	0.042733767	0.07861009	0.019278874	0.021902876
M1519	1B	562481285	0.06809537	0.432989691	99	0.042733767	0.078603234	0.021643232	-0.024589041
M11468	5B	180044568	0.068225468	0.350515464	99	0.042733767	0.078568775	0.052346747	0.059471539
M7103	3B	702846789	0.068225468	0.350515464	99	0.042733767	0.078568775	0.052346747	0.059471539
M12579	6A	530215873	0.068225468	0.350515464	99	0.042733767	0.078568775	0.052346747	-0.059471539
M11588	5B	8998565	0.068278439	0.484536082	99	0.042733767	0.078554765	0.022933535	-0.026054964
M4772	2B	731476082	0.068427623	0.402061856	99	0.042733767	0.078515372	0.025876711	-0.02939873
M3164	2A	758893275	0.068429115	0.391752577	99	0.042733767	0.078514978	0.020230275	0.02298377
M5160	2B	782126877	0.068448958	0.24742268	99	0.042733767	0.078509746	0.020160432	0.022904421
M8603	4A	5349394	0.068522005	0.288659794	99	0.042733767	0.078490497	0.022212776	0.025236104
M11002	5B	486082208	0.068527557	0.474226804	99	0.042733767	0.078489035	0.031222707	0.035472356
M13893	6D	7194101	0.068589592	0.391752577	99	0.042733767	0.078472708	0.018642435	-0.021179813
M2025	1D	18223009	0.06859622	0.072164948	99	0.042733767	0.078470964	0.029048075	0.03300174
M5811	2D	588737228	0.068631736	0.412371134	99	0.042733767	0.078461625	0.021973151	0.024963864
M2308	1D	683382396	0.068698688	0.268041237	99	0.042733767	0.078444033	0.0187779	-0.021333716
M11542	5B	728342303	0.068750625	0.432989691	99	0.042733767	0.078430399	0.025557909	-0.029036536
M3649	2B	46670271	0.068782316	0.453608247	99	0.042733767	0.078422086	0.026162785	0.02972374
M1076	1B	326043338	0.068815534	0.350515464	99	0.042733767	0.078413376	0.0525171	-0.059665078
M1079	1B	340462174	0.068815534	0.350515464	99	0.042733767	0.078413376	0.0525171	-0.059665078
M1140	1B	57477371	0.068815534	0.350515464	99	0.042733767	0.078413376	0.0525171	-0.059665078
M1155	1B	487411912	0.068815534	0.350515464	99	0.042733767	0.078413376	0.0525171	-0.059665078
M1157	1B	0	0.068815534	0.350515464	99	0.042733767	0.078413376	0.0525171	-0.059665078
M1177	1B	58370124	0.068815534	0.350515464	99	0.042733767	0.078413376	0.0525171	-0.059665078
M1185	1B	0	0.068815534	0.350515464	99	0.042733767	0.078413376	0.0525171	-0.059665078
M1207	1B	11614042	0.068815534	0.350515464	99	0.042733767	0.078413376	0.0525171	-0.059665078
M1197	1B	93129941	0.068815534	0.350515464	99	0.042733767	0.078413376	0.0525171	0.059665078
M7269	3B	347855022	0.068879167	0.381443299	99	0.042733767	0.078396705	0.035359253	-0.040171917
M3728	2B	50690865	0.068968128	0.463917526	99	0.042733767	0.078373425	0.020449809	-0.023233185
M6888	3B	6071524	0.069046414	0.350515464	99	0.042733767	0.078352966	0.021028727	-0.023890897
M5839	2D	571920602	0.069127434	0.474226804	99	0.042733767	0.07833182	0.022645184	-0.025727367
M6510	3A	634947372	0.06913516	0.494845361	99	0.042733767	0.078329804	0.019471663	0.022121905
M12808	6A	689032602	0.069146134	0.18556701	99	0.042733767	0.078326943	0.022392148	0.02543989
M8158	3B	75766790	0.069157359	0.195876289	99	0.042733767	0.078324016	0.021014133	0.023874318
M10373	5A	567502345	0.069171567	0.494845361	99	0.042733767	0.078320312	0.026375651	-0.029965578
M289	1A	375468454	0.069207806	0.257731959	99	0.042733767	0.078310868	0.02100249	-0.023861089
M14880	7A	692280965	0.069255517	0.340206186	99	0.042733767	0.078298444	0.04003423	0.045483194
M9212	4A	9824444	0.069267888	0.103092784	99	0.042733767	0.078295224	0.025833053	0.029349129
M243	1A	369272560	0.06929474	0.103092784	99	0.042733767	0.078288236	0.022403677	0.025452988
M12309	6A	23587868	0.069368622	0.257731959	99	0.042733767	0.078269027	0.01988489	0.022591375
M5621	2D	110910233	0.069415396	0.453608247	99	0.042733767	0.078256877	0.0235554	-0.02676147
M12102	6A	11577996	0.069422343	0.432989691	99	0.042733767	0.078255073	0.028328012	-0.032183671
M6063	3A	9012647	0.069463891	0.340206186	99	0.042733767	0.078244289	0.020987062	-0.023843562
M12580	6A	530215873	0.069494169	0.237113402	99	0.042733767	0.078236435	0.024709843	0.028073042
M1295	1B	35074916	0.069690166	0.268041237	99	0.042733767	0.078185683	0.021407991	-0.024321782
M8884	4A	629489184	0.069720574	0.360824742	99	0.042733767	0.078177822	0.02001272	0.022736605
M12034	5D	561671414	0.06988969	0.443298969	99	0.042733767	0.078134176	0.018575199	0.021103425
M7974	3B	113713782	0.069896129	0.154639175	99	0.042733767	0.078132516	0.022581448	0.025654955
M15378	7B	468150485	0.069937674	0.432989691	99	0.042733767	0.078121813	0.026233751	0.029804365
M12417	6A	49110792	0.069962572	0.381443299	99	0.042733767	0.078115402	0.044013164	0.050003692
M14007	6D	89723576	0.069962572	0.381443299	99	0.042733767	0.078115402	0.044013164	0.050003692
M637	1A	582567732	0.070005625	0.463917526	99	0.042733767	0.078104321	0.024397151	-0.02771779
M14419	7A	34920067	0.070053241	0.474226804	99	0.042733767	0.078092075	0.024206714	-0.027501433
M12203	6A	11569432	0.070220709	0.474226804	99	0.042733767	0.078049077	0.026081367	0.029631241
M6143	3A	20335431	0.070294203	0.18556701	99	0.042733767	0.078030242	0.022378371	0.025424238
M5666	2D	0	0.070344653	0.494845361	99	0.042733767	0.078017325	0.018161205	0.020633084
M15262	7B	71271240	0.070353737	0.443298969	99	0.042733767	0.078015001	0.024303748	0.027611673
M15292	7B	169497947	0.070367537	0.432989691	99	0.042733767	0.07801147	0.025566191	0.029045945
M1916	1B	676984396	0.070453881	0.175257732	99	0.042733767	0.077989394	0.01998639	0.02270669
M8265	3D	14857937	0.070605587	0.24742268	99	0.042733767	0.077950679	0.01799724	-0.020446802
M8898	4A	0	0.070729223	0.484536082	99	0.042733767	0.077919194	0.024759218	-0.028129137
M5643	2D	587305772	0.070850267	0.164948454	99	0.042733767	0.077888427	0.020016651	0.02274107
M8385	3D	284212614	0.070903814	0.443298969	99	0.042733767	0.077874835	0.027438011	0.031172534
M11577	5B	581759209	0.070918866	0.268041237	99	0.042733767	0.077871017	0.017354535	-0.01971662
M13788	6B	715680744	0.070980752	0.412371134	99	0.042733767	0.077855325	0.018599817	-0.021131394
M15261	7B	71271240	0.071042402	0.082474227	99	0.042733767	0.077839709	0.029983911	-0.03406495
M5747	2D	593851647	0.071056177	0.494845361	99	0.042733767	0.077836221	0.024956902	0.028353727
M9248	4A	718920407	0.071068825	0.412371134	99	0.042733767	0.07783302	0.021842706	-0.024815665
M2266	1D	482503736	0.07111086	0.288659794	99	0.042733767	0.077822384	0.016665277	-0.018933548
M774	1B	89404769	0.071120644	0.237113402	99	0.042733767	0.07781991	0.026891372	-0.030551493
M11548	5B	332444025	0.071148297	0.041237113	99	0.042733767	0.077812918	0.035159287	-0.039944735
M3622	2B	46945044	0.07117062	0.164948454	99	0.042733767	0.077807276	0.019983826	0.022703778
M12138	6A	231626622	0.07121742	0.474226804	99	0.042733767	0.077795455	0.022815596	-0.025920973
M8517	3D	612711286	0.071439908	0.24742268	99	0.042733767	0.077739368	0.022340308	-0.025380995
M3794	2B	96381383	0.071505781	0.484536082	99	0.042733767	0.077722799	0.024919275	-0.028310979
M7495	3B	335094862	0.071529202	0.371134021	99	0.042733767	0.077716912	0.037136329	0.042190867
M1589	1B	573008421	0.071555184	0.432989691	99	0.042733767	0.077710384	0.020207719	0.022958144
M7245	3B	0	0.071672122	0.24742268	99	0.042733767	0.077681033	0.020302571	-0.023065906
M6455	3A	569891580	0.07173377	0.319587629	99	0.042733767	0.077665581	0.01935753	-0.021992237
M12016	5D	0	0.071751071	0.484536082	99	0.042733767	0.077661247	0.022260883	0.02529076
M12047	6A	1889547	0.07181704	0.484536082	99	0.042733767	0.077644732	0.021984517	0.024976778
M9201	4A	714077495	0.071843767	0.144329897	99	0.042733767	0.077638046	0.029285255	-0.033271202
M9246	4A	715176525	0.07189023	0.113402062	99	0.042733767	0.077626429	0.02823808	0.032081498
M15555	7B	670917940	0.071996328	0.474226804	99	0.042733767	0.077599932	0.016781474	-0.019065561
M13588	6B	676372364	0.072079972	0.020618557	99	0.042733767	0.077579073	0.049793785	-0.0565711
M7293	3B	50790384	0.072085759	0.195876289	99	0.042733767	0.077577631	0.02120474	-0.024090867
M7908	3B	751756328	0.072203013	0.453608247	99	0.042733767	0.077548437	0.022741453	-0.025836739
M10574	5B	13944669	0.07237674	0.432989691	99	0.042733767	0.077505277	0.01719247	0.019532496
M11836	5B	0	0.072428997	0.257731959	99	0.042733767	0.077492317	0.026294161	0.029872997
M10153	5A	635583587	0.072435322	0.371134021	99	0.042733767	0.077490749	0.045894514	-0.052141108
M12457	6A	115329227	0.072520337	0.484536082	99	0.042733767	0.077469688	0.023568216	-0.02677603
M3174	2A	0	0.072538102	0.226804124	99	0.042733767	0.077465291	0.022614275	-0.02569225
M12536	6A	450448212	0.072569482	0.195876289	99	0.042733767	0.077457526	0.018240835	-0.020723552
M6912	3B	3064404	0.072655689	0.226804124	99	0.042733767	0.077436213	0.020456994	-0.023241347
M2840	2A	619688424	0.072713639	0.484536082	99	0.042733767	0.077421902	0.020597047	-0.023400463
M5472	2D	60319974	0.072718214	0.391752577	99	0.042733767	0.077420772	0.031700522	0.036015205
M1090	1B	315459354	0.073039872	0.226804124	99	0.042733767	0.077341566	0.019235078	-0.02185312
M14498	7A	56324324	0.073138517	0.319587629	99	0.042733767	0.077317351	0.019213972	-0.02182914
M6468	3A	587590385	0.07318484	0.391752577	99	0.042733767	0.077305993	0.021349498	0.024255328
M8097	3B	702728099	0.073300531	0.453608247	99	0.042733767	0.077277659	0.020502635	-0.0232932
M14174	7A	8774175	0.073413025	0.371134021	99	0.042733767	0.077250155	0.046274583	-0.052572907
M15058	7A	708435522	0.073413025	0.371134021	99	0.042733767	0.077250155	0.046274583	-0.052572907
M15094	7A	724030164	0.073413025	0.371134021	99	0.042733767	0.077250155	0.046274583	-0.052572907
M15023	7A	314279086	0.073413025	0.371134021	99	0.042733767	0.077250155	0.046274583	0.052572907
M15059	7A	719575839	0.073413025	0.371134021	99	0.042733767	0.077250155	0.046274583	0.052572907
M15082	7A	25024300	0.073413025	0.371134021	99	0.042733767	0.077250155	0.046274583	0.052572907
M2607	2A	82861639	0.073434701	0.443298969	99	0.042733767	0.07724486	0.016644136	0.01890953
M1464	1B	557465111	0.07350306	0.237113402	99	0.042733767	0.077228175	0.017609587	0.020006386
M11579	5B	581759209	0.073634116	0.319587629	99	0.042733767	0.077196233	0.019735183	-0.022421292
M13088	6B	11764484	0.073683151	0.06185567	99	0.042733767	0.077184298	0.026983063	-0.030655664
M13527	6B	29569629	0.073683664	0.319587629	99	0.042733767	0.077184173	0.040282804	-0.045765602
M1121	1B	39854453	0.073771537	0.309278351	99	0.042733767	0.077162806	0.026591258	-0.030210532
M1605	1B	532773116	0.073791394	0.371134021	99	0.042733767	0.077157982	0.038163991	-0.043358401
M3787	2B	0	0.073791486	0.154639175	99	0.042733767	0.07715796	0.025151467	-0.028574774
M3698	2B	68756048	0.073891536	0.371134021	99	0.042733767	0.077133673	0.016531593	0.018781669
M11662	5B	203695574	0.073943806	0.288659794	99	0.042733767	0.077120999	0.017546645	-0.019934877
M13884	6D	6343670	0.073949864	0.309278351	99	0.042733767	0.077119531	0.019803963	0.022499433
M6167	3A	19975582	0.074051003	0.391752577	99	0.042733767	0.077095038	0.018446418	-0.020957117
M4864	2B	744869635	0.074186276	0.371134021	99	0.042733767	0.077062335	0.018143822	0.020613335
M14546	7A	66283565	0.074221489	0.494845361	99	0.042733767	0.077053833	0.02385037	0.027096587
M6957	3B	35203565	0.074300185	0.309278351	99	0.042733767	0.077034848	0.020550512	-0.023347594
M7032	3B	18992710	0.074381441	0.360824742	99	0.042733767	0.077015268	0.019351965	-0.021985915
M11740	5B	676094493	0.074444889	0.371134021	99	0.042733767	0.076999996	0.040996607	0.046576559
M5468	2D	66144040	0.074446833	0.298969072	99	0.042733767	0.076999528	0.019052844	-0.021646081
M9934	5A	139519642	0.074469117	0.329896907	99	0.042733767	0.076994168	0.021143677	0.024021493
M8012	3B	533130365	0.074482796	0.360824742	99	0.042733767	0.076990878	0.030673498	-0.034848395
M11141	5B	415747285	0.074566959	0.257731959	99	0.042733767	0.076970653	0.018745865	0.021297321
M6667	3A	704351428	0.074654407	0.474226804	99	0.042733767	0.076949664	0.015410436	-0.017507914
M7265	3B	47202036	0.074673959	0.237113402	99	0.042733767	0.076944975	0.022001087	-0.024995603
M4960	2B	761846794	0.074707846	0.391752577	99	0.042733767	0.076936852	0.01964164	-0.022315018
M9051	4A	655256201	0.074787065	0.340206186	99	0.042733767	0.076917876	0.056929199	-0.064677698
M11028	5B	492256866	0.074791151	0.164948454	99	0.042733767	0.076916898	0.025326631	-0.028773779
M15548	7B	25684258	0.074807411	0.422680412	99	0.042733767	0.076913006	0.029445706	-0.033453491
M2822	2A	477627488	0.074981813	0.402061856	99	0.042733767	0.076871321	0.029217968	0.033194756
M1339	1B	370842543	0.075292541	0.463917526	99	0.042733767	0.076797313	0.027262667	-0.030973325
M7400	3B	422311619	0.075319941	0.12371134	99	0.042733767	0.076790803	0.024235441	-0.02753407
M6707	3A	710298658	0.075351975	0.371134021	99	0.042733767	0.076783195	0.016975434	0.01928592
M215	1A	288094235	0.07536049	0.381443299	99	0.042733767	0.076781174	0.0221373	0.025150355
M2035	1D	21254198	0.075373791	0.422680412	99	0.042733767	0.076778016	0.018599745	0.021131313
M11538	5B	0	0.075377901	0.371134021	99	0.042733767	0.076777041	0.020301019	-0.023064143
M11489	5B	550320578	0.075405646	0.463917526	99	0.042733767	0.076770457	0.020054194	0.022783723
M4613	2B	91473909	0.075478984	0.164948454	99	0.042733767	0.076753067	0.020703644	-0.023521568
M10546	5B	2582396	0.075482056	0.144329897	99	0.042733767	0.076752339	0.025688194	0.029184553
M14926	7A	699922650	0.075492919	0.298969072	99	0.042733767	0.076749765	0.01842651	0.020934499
M5612	2D	231460780	0.075504266	0.371134021	99	0.042733767	0.076747076	0.019541325	-0.022201048
M12789	6A	599169953	0.075592901	0.463917526	99	0.042733767	0.076726091	0.022429678	0.025482529
M4747	2B	147968189	0.075656469	0.484536082	99	0.042733767	0.076711058	0.022608506	-0.025685696
M11008	5B	488902270	0.07571105	0.144329897	99	0.042733767	0.07669816	0.028621239	-0.032516809
M9644	4B	200006364	0.075796375	0.216494845	99	0.042733767	0.076678019	0.02160889	-0.024550025
M13969	6D	60388899	0.07582713	0.278350515	99	0.042733767	0.076670765	0.021834881	-0.024806775
M3098	2A	744286377	0.075832949	0.402061856	99	0.042733767	0.076669393	0.018478145	0.020993161
M12628	6A	566632377	0.07593793	0.319587629	99	0.042733767	0.076644658	0.021422027	-0.024337728
M11338	5B	68317422	0.075940398	0.113402062	99	0.042733767	0.076644077	0.026739355	-0.030378786
M15112	7A	718204695	0.075947032	0.134020619	99	0.042733767	0.076642515	0.029694899	0.033736601
M11534	5B	558422737	0.075957971	0.206185567	99	0.042733767	0.076639941	0.022118931	0.025129486
M3022	2A	717007485	0.075985985	0.268041237	99	0.042733767	0.076633348	0.016937399	0.019242709
M13122	6B	52077541	0.07630111	0.391752577	99	0.042733767	0.076559377	0.019618361	0.02228857
M2857	2A	52393884	0.076366693	0.288659794	99	0.042733767	0.076544024	0.020523527	-0.023316936
M8572	4A	45872485	0.076441443	0.278350515	99	0.042733767	0.076526543	0.021590979	0.024529677
M14294	7A	0	0.076532185	0.360824742	99	0.042733767	0.076505347	0.041335362	-0.046961421
M12739	6A	710948071	0.07668905	0.175257732	99	0.042733767	0.07646877	0.021329498	-0.024232606
M11077	5B	502152339	0.076799189	0.268041237	99	0.042733767	0.076443138	0.019384435	-0.022022805
M2546	2A	43370517	0.077001391	0.216494845	99	0.042733767	0.076396184	0.021519483	0.024448449
M4974	2B	46505672	0.077166792	0.144329897	99	0.042733767	0.076357876	0.020304976	-0.023068638
M4416	2B	418106383	0.07720869	0.020618557	99	0.042733767	0.076348186	0.042260007	0.048011917
M5271	2B	384628356	0.077209774	0.134020619	99	0.042733767	0.076347936	0.021578235	0.024515198
M7086	3B	702849155	0.077248899	0.329896907	99	0.042733767	0.076338893	0.01739196	-0.019759138
M14921	7A	699917597	0.077699329	0.443298969	99	0.042733767	0.076235144	0.028219706	0.032060623
M14056	6D	446477288	0.077744582	0.391752577	99	0.042733767	0.076224757	0.017700132	0.020109255
M4692	2B	717237714	0.077760113	0.340206186	99	0.042733767	0.076221194	0.018325435	0.020819667
M6870	3A	0	0.077920596	0.443298969	99	0.042733767	0.07618442	0.031165322	0.03540716
M3707	2B	293132103	0.077983937	0.134020619	99	0.042733767	0.076169929	0.022336583	0.025376763
M10610	5B	0	0.078030481	0.154639175	99	0.042733767	0.076159288	0.027020936	-0.030698691
M9028	4A	49368188	0.078041514	0.06185567	99	0.042733767	0.076156767	0.03823207	0.043435747
M11745	5B	67371328	0.078059714	0.175257732	99	0.042733767	0.076152609	0.019207753	-0.021822075
M11139	5B	415747285	0.078137466	0.082474227	99	0.042733767	0.076134857	0.02772411	-0.031497573
M7410	3B	70909818	0.078149325	0.237113402	99	0.042733767	0.076132151	0.024878489	-0.028264641
M4752	2B	600038125	0.07816086	0.134020619	99	0.042733767	0.076129519	0.022490257	-0.025551353
M11503	5B	142781109	0.078189657	0.237113402	99	0.042733767	0.076122952	0.020599544	-0.023403299
M9451	4B	13088435	0.078210286	0.298969072	99	0.042733767	0.076118248	0.020646081	0.023456171
M4139	2B	389136726	0.078235848	0.360824742	99	0.042733767	0.076112422	0.035997265	0.040896768
M15098	7A	720912669	0.078300551	0.164948454	99	0.042733767	0.076097685	0.026464165	0.03006614
M12001	5D	554401631	0.078317463	0.484536082	99	0.042733767	0.076093835	0.02252716	-0.025593278
M1503	1B	559332514	0.07845739	0.350515464	99	0.042733767	0.076062016	0.019248944	0.021868872
M960	1B	95936529	0.078482928	0.340206186	99	0.042733767	0.076056215	0.016708907	-0.018983117
M9312	4A	0	0.078574017	0.463917526	99	0.042733767	0.076035543	0.024192483	0.027485265
M3183	2A	76749431	0.078717067	0.268041237	99	0.042733767	0.076003131	0.018704848	-0.021250721
M6925	3B	8262440	0.078754466	0.278350515	99	0.042733767	0.075994668	0.017605503	-0.020001746
M7755	3B	696333012	0.078768939	0.340206186	99	0.042733767	0.075991394	0.016494945	0.018740033
M8584	4A	716765921	0.078812635	0.288659794	99	0.042733767	0.075981513	0.018142334	0.020611644
M235	1A	341122401	0.078916949	0.082474227	99	0.042733767	0.07595795	0.025683754	0.029179509
M2900	2A	49655671	0.07897256	0.350515464	99	0.042733767	0.075945402	0.017001458	-0.019315486
M1057	1B	48462498	0.079118002	0.432989691	99	0.042733767	0.07591263	0.020583217	-0.02338475
M9026	4A	685816847	0.079223372	0.24742268	99	0.042733767	0.075888929	0.017623087	0.020021724
M8439	3D	524197814	0.079479621	0.474226804	99	0.042733767	0.075831434	0.023457873	-0.026650669
M14492	7A	52413793	0.079497973	0.412371134	99	0.042733767	0.075827324	0.034403916	-0.039086552
M14896	7A	694049602	0.079540837	0.484536082	99	0.042733767	0.075817729	0.018285227	-0.020773986
M11253	5B	624609798	0.079596264	0.06185567	99	0.042733767	0.07580533	0.032019157	0.036377208
M7007	3B	0	0.079635781	0.494845361	99	0.042733767	0.075796495	0.02320753	-0.026366253
M13961	6D	34075472	0.079739619	0.350515464	99	0.042733767	0.075773305	0.023446109	0.026637304
M13845	6B	0	0.079812774	0.257731959	99	0.042733767	0.075756987	0.019837602	0.022537651
M14043	6D	625779148	0.07986908	0.18556701	99	0.042733767	0.075744438	0.021419808	0.024335207
M8194	3B	818284655	0.079956956	0.329896907	99	0.042733767	0.075724873	0.020810989	0.023643523
M1617	1B	628627682	0.080067846	0.340206186	99	0.042733767	0.075700217	0.016523077	0.018771994
M2115	1D	472550886	0.080148446	0.412371134	99	0.042733767	0.07568232	0.018699531	0.02124468
M11547	5B	332444025	0.080313167	0.309278351	99	0.042733767	0.075645805	0.020747742	0.023571669
M8534	4A	17017869	0.080355656	0.381443299	99	0.042733767	0.075636399	0.023678838	-0.026901709
M5240	2B	31519188	0.080383908	0.371134021	99	0.042733767	0.075630148	0.030251597	-0.034369071
M7150	3B	24929087	0.080419488	0.268041237	99	0.042733767	0.075622279	0.021737898	0.024696592
M14066	6D	451750294	0.080683402	0.381443299	99	0.042733767	0.07556403	0.022104934	-0.025113585
M12857	6A	92320684	0.080784166	0.371134021	99	0.042733767	0.075541846	0.040554717	0.046074524
M12622	6A	0	0.080812637	0.309278351	99	0.042733767	0.075535583	0.026157469	-0.0297177
M4489	2B	643092677	0.080866403	0.474226804	99	0.042733767	0.075523762	0.026600829	0.030221405
M12192	6A	9372486	0.08090181	0.237113402	99	0.042733767	0.075515983	0.018352933	0.020850907
M5225	2B	643330937	0.081030804	0.402061856	99	0.042733767	0.075487672	0.018409551	-0.020915232
M8316	3D	46582531	0.081040182	0.350515464	99	0.042733767	0.075485616	0.018343486	0.020840175
M10494	5A	666108317	0.081068983	0.206185567	99	0.042733767	0.075479303	0.021955437	-0.02494374
M9646	4B	660656439	0.08109525	0.164948454	99	0.042733767	0.075473547	0.020705948	-0.023524186
M6494	3A	621586722	0.081183023	0.298969072	99	0.042733767	0.075454328	0.017211577	0.019554204
M8504	3D	603669558	0.08120088	0.237113402	99	0.042733767	0.075450421	0.020589567	-0.023391965
M5966	2D	27005186	0.081206426	0.164948454	99	0.042733767	0.075449207	0.021936898	0.024922677
M13071	6B	37127862	0.081232757	0.360824742	99	0.042733767	0.075443448	0.032572759	0.037006161
M13905	6D	10735296	0.081290454	0.329896907	99	0.042733767	0.075430836	0.020580578	-0.023381752
M8740	4A	521603853	0.081367452	0.453608247	99	0.042733767	0.07541402	0.02405302	-0.027326819
M4779	2B	730646260	0.081374241	0.030927835	99	0.042733767	0.075412538	0.042135365	0.047870311
M12038	6A	955957	0.08139719	0.443298969	99	0.042733767	0.07540753	0.021185775	-0.024069321
M14858	7A	675060109	0.081421357	0.206185567	99	0.042733767	0.075402257	0.0172535	-0.019601833
M12371	6A	305511739	0.081422366	0.412371134	99	0.042733767	0.075402037	0.022061352	-0.02506407
M6225	3A	116123448	0.081471467	0.412371134	99	0.042733767	0.075391331	0.021802006	0.024769426
M11238	5B	499309809	0.081557374	0.402061856	99	0.042733767	0.075372615	0.014897984	0.016925713
M6947	3B	5857902	0.0816139	0.18556701	99	0.042733767	0.075360313	0.023146026	0.026296377
M3270	2A	766416023	0.081736467	0.402061856	99	0.042733767	0.075333669	0.016285739	0.018502352
M3865	2B	132352331	0.081751154	0.402061856	99	0.042733767	0.075330479	0.024785847	0.02815939
M3163	2A	758893275	0.081790452	0.072164948	99	0.042733767	0.075321947	0.03000747	-0.034091716
M14345	7A	25304250	0.08187418	0.329896907	99	0.042733767	0.075303785	0.016506586	0.018753259
M15218	7B	0	0.081906113	0.371134021	99	0.042733767	0.075296863	0.019733329	-0.022419185
M13687	6B	614446534	0.082051075	0.463917526	99	0.042733767	0.075265478	0.019069987	0.021665558
M2575	2A	71172019	0.082222405	0.422680412	99	0.042733767	0.075228464	0.024293991	-0.027600589
M9486	4B	103551390	0.082231929	0.474226804	99	0.042733767	0.075226409	0.01921359	0.021828707
M5701	2D	591603469	0.082237794	0.041237113	99	0.042733767	0.075225143	0.033898309	0.038512128
M822	1B	35453808	0.082327669	0.278350515	99	0.042733767	0.075205764	0.022502998	0.025565828
M5220	2B	0	0.082349034	0.474226804	99	0.042733767	0.075201161	0.015586917	-0.017708416
M6433	3A	570671227	0.082396272	0.453608247	99	0.042733767	0.075190987	0.025418354	-0.028877986
M9173	4A	708514620	0.082426174	0.020618557	99	0.042733767	0.075184551	0.058290983	0.066224831
M6628	3A	732314439	0.082426174	0.020618557	99	0.042733767	0.075184551	0.058290983	-0.066224831
M14129	7A	2682255	0.082525163	0.494845361	99	0.042733767	0.075163261	0.020172491	-0.022918121
M1515	1B	594654791	0.082625304	0.463917526	99	0.042733767	0.075141752	0.016814204	-0.019102745
M13563	6B	663760681	0.082785769	0.041237113	99	0.042733767	0.075107347	0.0382714	-0.04348043
M1358	1B	7319459	0.082815619	0.309278351	99	0.042733767	0.075100954	0.017101989	0.019429701
M9914	5A	36718388	0.082929649	0.041237113	99	0.042733767	0.075076559	0.033794531	-0.038394224
M7072	3B	15205844	0.082993347	0.350515464	99	0.042733767	0.075062947	0.021533124	0.024463946
M8259	3D	0	0.083096246	0.360824742	99	0.042733767	0.075040983	0.020794178	-0.023624424
M1549	1B	566170601	0.0831012	0.350515464	99	0.042733767	0.075039927	0.046214476	-0.052504619
M962	1B	499209336	0.083149024	0.226804124	99	0.042733767	0.075029729	0.020254864	0.023011706
M11683	5B	631548275	0.083153913	0.06185567	99	0.042733767	0.075028687	0.029279138	-0.033264253
M6283	3A	40814340	0.083223266	0.484536082	99	0.042733767	0.075013912	0.025855907	0.029375094
M5625	2D	568465158	0.083436584	0.134020619	99	0.042733767	0.07496855	0.021634815	-0.024579479
M7326	3B	64795071	0.083445761	0.453608247	99	0.042733767	0.074966601	0.01979634	0.022490773
M5544	2D	400056735	0.083491202	0.350515464	99	0.042733767	0.074956956	0.0166745	0.018944027
M5350	2B	797277976	0.083500802	0.134020619	99	0.042733767	0.074954919	0.023321271	0.026495474
M7156	3B	24940694	0.083509423	0.082474227	99	0.042733767	0.07495309	0.025966244	0.029500448
M1102	1B	30546167	0.08353103	0.381443299	99	0.042733767	0.074948507	0.034090348	0.038730305
M7390	3B	48543715	0.083531957	0.443298969	99	0.042733767	0.07494831	0.015595381	-0.017718031
M6694	3A	712196780	0.08356869	0.474226804	99	0.042733767	0.074940521	0.016513341	-0.018760933
M953	1B	8569664	0.083585984	0.360824742	99	0.042733767	0.074936856	0.02893189	-0.032869741
M6992	3B	5016288	0.083604909	0.309278351	99	0.042733767	0.074932845	0.01866246	-0.021202564
M15221	7B	36484341	0.083690075	0.371134021	99	0.042733767	0.07491481	0.019257913	-0.021879062
M3374	2A	646343478	0.083881401	0.381443299	99	0.042733767	0.074874368	0.015128093	0.017187142
M13864	6D	1585297	0.084033206	0.484536082	99	0.042733767	0.074842352	0.025784213	0.029293641
M3029	2A	720450589	0.084144952	0.360824742	99	0.042733767	0.074818824	0.039942834	0.045379359
M8823	4A	612096350	0.084154391	0.082474227	99	0.042733767	0.074816839	0.025679533	-0.029174713
M5573	2D	476041769	0.084157751	0.06185567	99	0.042733767	0.074816132	0.027020936	-0.030698692
M2984	2A	706749285	0.084232009	0.432989691	99	0.042733767	0.074800519	0.024738159	-0.028105211
M6708	3A	710298658	0.084232933	0.288659794	99	0.042733767	0.074800325	0.024656749	-0.028012721
M10062	5A	469608194	0.084233099	0.082474227	99	0.042733767	0.07480029	0.02453187	-0.027870844
M7009	3B	15335353	0.084482342	0.329896907	99	0.042733767	0.074747997	0.020313334	-0.023078134
M7434	3B	199675977	0.084510732	0.103092784	99	0.042733767	0.074742052	0.023923263	0.027179402
M10307	5A	0	0.084564223	0.154639175	99	0.042733767	0.074730855	0.024343246	0.027656548
M14165	7A	589392476	0.084572146	0.092783505	99	0.042733767	0.074729197	0.03217476	0.03655399
M7312	3B	0	0.084622768	0.340206186	99	0.042733767	0.07471861	0.020686594	0.023502198
M8566	4A	318817830	0.084665835	0.103092784	99	0.042733767	0.074709608	0.02217756	-0.025196095
M5977	2D	0	0.084727553	0.453608247	99	0.042733767	0.074696716	0.023053001	0.02619069
M12136	6A	5480626	0.084728078	0.226804124	99	0.042733767	0.074696606	0.018011573	-0.020463086
M1536	1B	572148431	0.084766357	0.474226804	99	0.042733767	0.074688616	0.021936128	0.024921803
M11608	5B	587341324	0.084822396	0.195876289	99	0.042733767	0.074676925	0.020266738	0.023025196
M7135	3B	23919390	0.084842108	0.381443299	99	0.042733767	0.074672815	0.032470305	0.036889762
M10767	5B	372865948	0.084956017	0.041237113	99	0.042733767	0.074649083	0.036265432	-0.041201435
M4787	2B	734634084	0.084977569	0.432989691	99	0.042733767	0.074644597	0.019566703	-0.022229881
M4683	2B	733177784	0.085038092	0.041237113	99	0.042733767	0.074632006	0.033435153	0.037985933
M5086	2B	757936127	0.085070474	0.319587629	99	0.042733767	0.074625273	0.018479168	0.020994324
M878	1B	22152407	0.085090719	0.329896907	99	0.042733767	0.074621065	0.019828106	-0.022526863
M2534	2A	573217596	0.085182092	0.494845361	99	0.042733767	0.074602087	0.01668646	-0.018957615
M3999	2B	213709998	0.085290483	0.298969072	99	0.042733767	0.074579604	0.01527181	-0.01735042
M4305	2B	648274808	0.085294364	0.175257732	99	0.042733767	0.0745788	0.019723684	-0.022408229
M12440	6A	243916466	0.085402372	0.113402062	99	0.042733767	0.074556428	0.023128343	-0.026276287
M265	1A	355850745	0.085417322	0.030927835	99	0.042733767	0.074553334	0.03648961	-0.041456125
M9253	4A	0	0.085535107	0.24742268	99	0.042733767	0.074528977	0.017860649	-0.02029162
M1560	1B	685243263	0.085581872	0.051546392	99	0.042733767	0.074519317	0.036305062	-0.041246458
M12012	5D	552080511	0.08564341	0.24742268	99	0.042733767	0.074506614	0.017078637	-0.01940317
M14523	7A	57712321	0.085738787	0.360824742	99	0.042733767	0.074486945	0.017703481	-0.02011306
M9398	4A	742001973	0.085759763	0.391752577	99	0.042733767	0.074482623	0.018516377	-0.021036598
M7037	3B	18450122	0.08579282	0.309278351	99	0.042733767	0.074475813	0.018936019	0.021513356
M7521	3B	470866029	0.085819306	0.329896907	99	0.042733767	0.074470359	0.031531576	0.035823264
M5481	2D	68916330	0.085879863	0.041237113	99	0.042733767	0.074457897	0.034277531	-0.038942965
M8971	4A	142723140	0.08595737	0.432989691	99	0.042733767	0.07444196	0.029544718	0.03356598
M10656	5B	47592205	0.086106191	0.12371134	99	0.042733767	0.074411404	0.028303258	-0.032155548
M10687	5B	69504666	0.086106191	0.12371134	99	0.042733767	0.074411404	0.028303258	-0.032155548
M10594	5B	19729352	0.086106191	0.12371134	99	0.042733767	0.074411404	0.028303258	0.032155548
M10693	5B	78260556	0.086106191	0.12371134	99	0.042733767	0.074411404	0.028303258	0.032155548
M2639	2A	82187693	0.086121092	0.216494845	99	0.042733767	0.074408347	0.022256125	-0.025285354
M7281	3B	48788274	0.086188846	0.340206186	99	0.042733767	0.074394458	0.019404107	0.022045154
M3874	2B	116192482	0.086216923	0.484536082	99	0.042733767	0.074388706	0.016928104	0.019232148
M6358	3A	358500939	0.086274238	0.288659794	99	0.042733767	0.07437697	0.01883571	-0.021399394
M4686	2B	704429363	0.086306668	0.494845361	99	0.042733767	0.074370333	0.019725867	0.022410708
M6931	3B	5760912	0.086366011	0.391752577	99	0.042733767	0.074358196	0.016761802	-0.019043211
M10451	5A	177507239	0.086427484	0.494845361	99	0.042733767	0.074345633	0.022593636	-0.025668803
M12581	6A	525799703	0.086428419	0.432989691	99	0.042733767	0.074345442	0.019560196	0.022222488
M7162	3B	28279863	0.086563413	0.298969072	99	0.042733767	0.074317889	0.018395915	-0.02089974
M10128	5A	461008994	0.086643106	0.051546392	99	0.042733767	0.074301645	0.039206187	0.044542448
M12872	6A	609428248	0.086649334	0.195876289	99	0.042733767	0.074300376	0.024039483	0.027311441
M14039	6D	421558768	0.086773891	0.484536082	99	0.042733767	0.074275022	0.022448676	0.025504113
M3715	2B	79308806	0.086816863	0.474226804	99	0.042733767	0.074266285	0.023520212	-0.026721492
M10692	5B	78260556	0.086818918	0.113402062	99	0.042733767	0.074265867	0.029538378	-0.033558777
M6230	3A	563120760	0.086825702	0.432989691	99	0.042733767	0.074264488	0.015058334	0.017107888
M8206	3B	743193869	0.086893305	0.340206186	99	0.042733767	0.074250753	0.020371415	0.02314412
M5940	2D	620909947	0.086960077	0.278350515	99	0.042733767	0.074237199	0.017214275	0.019557269
M12782	6A	397083072	0.086997527	0.278350515	99	0.042733767	0.074229602	0.019349578	0.021983204
M7509	3B	485581903	0.087041174	0.350515464	99	0.042733767	0.074220752	0.020593897	0.023396884
M7456	3B	248134968	0.087166123	0.134020619	99	0.042733767	0.074195444	0.019315033	0.021943957
M4526	2B	547273650	0.087219496	0.402061856	99	0.042733767	0.074184646	0.018036225	0.020491093
M1123	1B	95336138	0.087241863	0.340206186	99	0.042733767	0.074180123	0.066813775	-0.075907641
M1165	1B	22864252	0.087241863	0.340206186	99	0.042733767	0.074180123	0.066813775	-0.075907641
M5972	2D	0	0.087241863	0.340206186	99	0.042733767	0.074180123	0.066813775	-0.075907641
M7101	3B	0	0.087241863	0.340206186	99	0.042733767	0.074180123	0.066813775	-0.075907641
M7747	3B	667219844	0.087241863	0.340206186	99	0.042733767	0.074180123	0.066813775	-0.075907641
M12719	6A	605241398	0.087241863	0.340206186	99	0.042733767	0.074180123	0.066813775	0.075907641
M6660	3A	699467553	0.087248723	0.391752577	99	0.042733767	0.074178736	0.036958888	0.041989275
M15310	7B	160614792	0.087288077	0.144329897	99	0.042733767	0.074170782	0.023205193	-0.026363597
M10126	5A	480507460	0.087296443	0.340206186	99	0.042733767	0.074169092	0.033163923	-0.037677786
M6741	3A	716528015	0.087418928	0.402061856	99	0.042733767	0.074144363	0.020926471	-0.023774723
M14192	7A	13842196	0.087527904	0.360824742	99	0.042733767	0.074122393	0.047348902	-0.053793449
M202	1A	52532558	0.087548245	0.484536082	99	0.042733767	0.074118296	0.015829874	0.017984441
M10675	5B	153502375	0.087638306	0.381443299	99	0.042733767	0.074100167	0.020627042	0.02343454
M13989	6D	149883876	0.087724296	0.463917526	99	0.042733767	0.074082876	0.026180905	0.029744326
M7175	3B	28804833	0.087758444	0.412371134	99	0.042733767	0.074076015	0.014319067	-0.016268002
M2902	2A	476277816	0.088016143	0.309278351	99	0.042733767	0.074024333	0.015631192	-0.017758717
M13732	6B	707338714	0.088058506	0.329896907	99	0.042733767	0.074015853	0.02276831	-0.025867251
M2856	2A	423291292	0.088209593	0.288659794	99	0.042733767	0.073985645	0.017187411	0.019526749
M4289	2B	143000173	0.088258122	0.134020619	99	0.042733767	0.073975954	0.021885311	0.024864069
M1742	1B	502110575	0.088286781	0.175257732	99	0.042733767	0.073970234	0.017359826	0.019722631
M4678	2B	595508003	0.08829185	0.288659794	99	0.042733767	0.073969223	0.019893795	0.022601493
M11195	5B	415680465	0.088294127	0.402061856	99	0.042733767	0.073968768	0.025859876	0.029379602
M13724	6B	462318879	0.08831826	0.422680412	99	0.042733767	0.073963953	0.015501142	0.017610966
M877	1B	22152407	0.088319095	0.319587629	99	0.042733767	0.073963787	0.016323751	-0.018545538
M6476	3A	595935042	0.088336678	0.082474227	99	0.042733767	0.07396028	0.02532068	0.028767018
M6495	3A	625237502	0.088336678	0.082474227	99	0.042733767	0.07396028	0.02532068	0.028767018
M10552	5B	713387538	0.088381621	0.195876289	99	0.042733767	0.073951319	0.023008293	-0.026139898
M5293	2B	795769053	0.088388219	0.257731959	99	0.042733767	0.073950004	0.019643475	-0.022317102
M4624	2B	398976460	0.088406936	0.154639175	99	0.042733767	0.073946274	0.023520453	0.026721766
M9149	4A	22270015	0.08851623	0.175257732	99	0.042733767	0.073924512	0.02243044	-0.025483395
M11575	5B	4511373	0.088645709	0.484536082	99	0.042733767	0.073898768	0.023491109	0.026688428
M9987	5A	333414537	0.088650609	0.24742268	99	0.042733767	0.073897795	0.015958822	-0.01813094
M7376	3B	79421097	0.088701022	0.072164948	99	0.042733767	0.073887783	0.029485041	-0.03349818
M14971	7A	621160098	0.08872165	0.072164948	99	0.042733767	0.073883688	0.025277486	-0.028717945
M5280	2B	549670301	0.088783191	0.164948454	99	0.042733767	0.073871479	0.022390373	-0.025437874
M1886	1B	480971976	0.088834958	0.144329897	99	0.042733767	0.073861215	0.021593692	0.024532758
M11901	5D	175947785	0.088960955	0.134020619	99	0.042733767	0.073836262	0.026223026	0.02979218
M5069	2B	766233155	0.088973816	0.020618557	99	0.042733767	0.073833717	0.041524928	-0.047176789
M5518	2D	212311734	0.088998655	0.257731959	99	0.042733767	0.073828803	0.016512948	-0.018760487
M5402	2D	319705897	0.089008618	0.319587629	99	0.042733767	0.073826833	0.020845086	-0.023682262
M1311	1B	328983636	0.089057574	0.463917526	99	0.042733767	0.073817154	0.024648928	0.028003835
M5542	2D	530255014	0.089139147	0.309278351	99	0.042733767	0.073801039	0.018639929	-0.021176966
M12000	5D	555036729	0.089212616	0.154639175	99	0.042733767	0.073786539	0.020831614	-0.023666956
M7122	3B	25942617	0.089218543	0.226804124	99	0.042733767	0.073785369	0.018158532	0.020630046
M2506	2A	419266894	0.089227299	0.494845361	99	0.042733767	0.073783642	0.017757746	-0.020174711
M5174	2B	0	0.089298496	0.288659794	99	0.042733767	0.073769606	0.016155105	-0.018353938
M6320	3A	434822187	0.08942092	0.391752577	99	0.042733767	0.073745498	0.019909979	-0.02261988
M4374	2B	446932626	0.089476458	0.494845361	99	0.042733767	0.073734574	0.020066964	-0.022798232
M1527	1B	564653541	0.089532095	0.237113402	99	0.042733767	0.073723638	0.015913339	0.018079265
M8553	4A	6919003	0.089533663	0.494845361	99	0.042733767	0.07372333	0.020231795	0.022985496
M4230	2B	219214772	0.089566131	0.020618557	99	0.042733767	0.073716951	0.04584465	-0.052084457
M9421	4A	0	0.089625512	0.206185567	99	0.042733767	0.073705292	0.018113048	-0.020578372
M4770	2B	733890211	0.08968127	0.134020619	99	0.042733767	0.073694352	0.022214267	0.025237799
M10348	5A	565612395	0.089688138	0.195876289	99	0.042733767	0.073693005	0.018356764	-0.02085526
M3873	2B	116192482	0.089775999	0.463917526	99	0.042733767	0.073675783	0.020947352	0.023798446
M15213	7B	45000486	0.089820197	0.154639175	99	0.042733767	0.073667127	0.024144573	-0.027430834
M7902	3B	752301746	0.089836688	0.453608247	99	0.042733767	0.073663898	0.020207965	-0.022958423
M15445	7B	541509916	0.089888547	0.350515464	99	0.042733767	0.073653749	0.016425157	0.018660746
M14402	7A	29482742	0.090012279	0.484536082	99	0.042733767	0.073629561	0.015206416	0.017276125
M1180	1B	90108160	0.090027141	0.041237113	99	0.042733767	0.073626658	0.033254562	0.037780762
M9845	5A	10268070	0.090148293	0.092783505	99	0.042733767	0.073603013	0.025317467	-0.028763367
M7917	3B	751230044	0.090222645	0.432989691	99	0.042733767	0.07358852	0.021453328	0.02437329
M121	1A	21638580	0.090343888	0.494845361	99	0.042733767	0.073564914	0.020067725	0.022799096
M1497	1B	563779678	0.090470898	0.484536082	99	0.042733767	0.073540224	0.016178532	-0.018380554
M7373	3B	281007929	0.090491034	0.072164948	99	0.042733767	0.073536313	0.02372563	0.02695487
M13462	6B	616311748	0.090528745	0.474226804	99	0.042733767	0.073528991	0.020476519	0.02326353
M12198	6A	12896985	0.090536015	0.412371134	99	0.042733767	0.07352758	0.020129022	0.022868735
M8648	4A	335898876	0.090602518	0.216494845	99	0.042733767	0.073514677	0.02144462	0.024363396
M7030	3B	579518208	0.090622572	0.257731959	99	0.042733767	0.073510788	0.017513668	-0.019897412
M6976	3B	9094032	0.090661795	0.422680412	99	0.042733767	0.073503185	0.01648169	0.018724974
M9893	5A	33931366	0.0906625	0.24742268	99	0.042733767	0.073503048	0.019618359	0.022288567
M15267	7B	74300485	0.090786034	0.020618557	99	0.042733767	0.073479126	0.048812966	-0.055456784
M7043	3B	126502584	0.090786034	0.020618557	99	0.042733767	0.073479126	0.048812966	0.055456784
M10414	5A	469501411	0.090850969	0.175257732	99	0.042733767	0.073466565	0.021400943	0.024313775
M5982	2D	642441495	0.090870102	0.453608247	99	0.042733767	0.073462866	0.026264919	0.029839776
M10672	5B	308626623	0.090904757	0.329896907	99	0.042733767	0.073456168	0.019892086	0.022599551
M153	1A	31918043	0.091106696	0.226804124	99	0.042733767	0.073417196	0.022644637	0.025726745
M6969	3B	34156784	0.091136389	0.412371134	99	0.042733767	0.073411473	0.01522303	0.017295
M4566	2B	692625689	0.091166831	0.494845361	99	0.042733767	0.073405609	0.020093464	-0.022828338
M1145	1B	37570116	0.091176786	0.288659794	99	0.042733767	0.073403691	0.021495774	0.024421513
M14741	7A	0	0.091235264	0.154639175	99	0.042733767	0.073392433	0.020715431	0.023534959
M8321	3D	37969650	0.091282303	0.402061856	99	0.042733767	0.073383383	0.017774991	-0.020194303
M10563	5B	11085155	0.091355997	0.463917526	99	0.042733767	0.073369214	0.021852986	0.024827344
M7880	3B	0	0.091373687	0.082474227	99	0.042733767	0.073365815	0.026730628	-0.03036887
M14982	7A	566622348	0.091473438	0.288659794	99	0.042733767	0.073346661	0.017056939	0.019378518
M2815	2A	0	0.091573396	0.494845361	99	0.042733767	0.073327491	0.021152834	0.024031897
M8301	3D	18727134	0.091581372	0.360824742	99	0.042733767	0.073325962	0.019952586	-0.022668286
M1324	1B	30723633	0.091944435	0.134020619	99	0.042733767	0.073256532	0.023907169	-0.027161117
M4509	2B	668683546	0.091981174	0.463917526	99	0.042733767	0.073249523	0.025538773	-0.029014795
M8843	4A	180859936	0.092041873	0.360824742	99	0.042733767	0.07323795	0.015793089	0.017942649
M11665	5B	609899764	0.092123931	0.350515464	99	0.042733767	0.073222318	0.014796128	-0.016809994
M2571	2A	71172019	0.092296777	0.371134021	99	0.042733767	0.073189441	0.017757347	0.020174258
M8254	3D	16234201	0.092389943	0.226804124	99	0.042733767	0.073171748	0.022783886	-0.025884947
M8287	3D	9312378	0.092389943	0.226804124	99	0.042733767	0.073171748	0.022783886	0.025884947
M3813	2B	99767221	0.092474366	0.391752577	99	0.042733767	0.073155732	0.017895891	-0.020331658
M1025	1B	129070027	0.092559714	0.340206186	99	0.042733767	0.073139558	0.020434873	-0.023216215
M1576	1B	420600926	0.092613324	0.381443299	99	0.042733767	0.073129406	0.038240342	-0.043445145
M11636	5B	600130957	0.092722527	0.12371134	99	0.042733767	0.073108748	0.025413122	-0.028872042
M12508	6A	252993747	0.092878196	0.494845361	99	0.042733767	0.073079346	0.014592584	-0.016578746
M9374	4A	6793449	0.092949848	0.154639175	99	0.042733767	0.073065831	0.022981413	-0.026109359
M4773	2B	732350878	0.092997594	0.432989691	99	0.042733767	0.073056832	0.024056131	0.027330354
M3756	2B	392096989	0.093095094	0.453608247	99	0.042733767	0.07303847	0.0217179	-0.024673872
M15354	7B	364043435	0.093101729	0.092783505	99	0.042733767	0.073037221	0.025791492	0.029301912
M13617	6B	683559271	0.093129077	0.381443299	99	0.042733767	0.073032075	0.021301204	0.024200461
M4988	2B	23162815	0.093178906	0.06185567	99	0.042733767	0.073022703	0.027624461	0.031384362
M11217	5B	628773372	0.093243353	0.453608247	99	0.042733767	0.07301059	0.021804968	-0.024772791
M580	1A	565296725	0.09326911	0.030927835	99	0.042733767	0.073005752	0.035559564	0.040399492
M6722	3A	714455841	0.093276167	0.422680412	99	0.042733767	0.073004426	0.018150907	-0.020621384
M9389	4A	732814470	0.093306393	0.12371134	99	0.042733767	0.072998751	0.024031896	-0.02730282
M10612	5B	316546278	0.093462867	0.474226804	99	0.042733767	0.072969401	0.023611382	-0.026825072
M1575	1B	420600926	0.093557809	0.391752577	99	0.042733767	0.072951619	0.018336535	-0.020832278
M14140	7A	0	0.093579418	0.195876289	99	0.042733767	0.072947575	0.020334872	-0.023102603
M13194	6B	83594697	0.09361581	0.391752577	99	0.042733767	0.072940766	0.032848673	-0.037319628
M13919	6D	12435844	0.09366843	0.298969072	99	0.042733767	0.072930926	0.021594565	0.024533751
M11930	5D	391278717	0.093785282	0.381443299	99	0.042733767	0.072909097	0.019042319	0.021634124
M5614	2D	565128626	0.093848086	0.154639175	99	0.042733767	0.072897377	0.018861097	0.021428236
M182	1A	344675281	0.093883311	0.412371134	99	0.042733767	0.072890807	0.015615905	0.017741349
M14401	7A	29482742	0.093950408	0.432989691	99	0.042733767	0.0728783	0.0163961	-0.018627734
M191	1A	50281762	0.094015155	0.391752577	99	0.042733767	0.072866241	0.016179043	-0.018381134
M7696	3B	669426645	0.094082331	0.422680412	99	0.042733767	0.07285374	0.01920343	-0.021817164
M4734	2B	712640982	0.094128609	0.391752577	99	0.042733767	0.072845133	0.0204256	0.02320568
M14386	7A	28691606	0.094133134	0.134020619	99	0.042733767	0.072844291	0.022107794	0.025116833
M6213	3A	24559657	0.094157244	0.463917526	99	0.042733767	0.07283981	0.018756086	-0.021308932
M5897	2D	608405941	0.09416992	0.391752577	99	0.042733767	0.072837454	0.018277329	-0.020765013
M7173	3B	41138847	0.094327075	0.432989691	99	0.042733767	0.072808275	0.01536629	0.01745776
M11236	5B	526518472	0.094531257	0.350515464	99	0.042733767	0.072770445	0.015754118	0.017898374
M10596	5B	20167023	0.094654967	0.371134021	99	0.042733767	0.072747568	0.019489117	-0.022141735
M4684	2B	733177784	0.094780779	0.350515464	99	0.042733767	0.072724337	0.024160629	0.027449075
M4297	2B	556517600	0.094798454	0.18556701	99	0.042733767	0.072721076	0.022586899	0.025661149
M6080	3A	0	0.094807972	0.072164948	99	0.042733767	0.07271932	0.029959457	-0.034037168
M3888	2B	0	0.095047632	0.175257732	99	0.042733767	0.072675174	0.021073558	0.023941831
M14586	7A	85601206	0.095168201	0.381443299	99	0.042733767	0.072653012	0.017998937	-0.02044873
M13717	6B	0	0.09519523	0.103092784	99	0.042733767	0.072648048	0.022733065	-0.025827209
M15356	7B	286275361	0.095217833	0.12371134	99	0.042733767	0.072643898	0.025004886	0.028408243
M15405	7B	509576259	0.095217833	0.12371134	99	0.042733767	0.072643898	0.025004886	-0.028408243
M10420	5A	585202112	0.095324564	0.340206186	99	0.042733767	0.072624317	0.023128325	0.026276267
M7240	3B	42562343	0.095556819	0.319587629	99	0.042733767	0.07258179	0.017952873	-0.020396396
M12471	6A	166800871	0.095598668	0.402061856	99	0.042733767	0.072574139	0.028346728	0.032204934
M79	1A	14200944	0.095622885	0.360824742	99	0.042733767	0.072569714	0.036609607	0.041592455
M6567	3A	658048755	0.095761868	0.144329897	99	0.042733767	0.072544339	0.021959942	-0.024948858
M3210	2A	778811091	0.095957984	0.206185567	99	0.042733767	0.072508603	0.019492741	-0.022145852
M5104	2B	773807439	0.096015198	0.237113402	99	0.042733767	0.072498193	0.019310996	-0.021939371
M15304	7B	130505517	0.096016886	0.391752577	99	0.042733767	0.072497886	0.021524418	0.024454055
M3072	2A	630595485	0.096020452	0.278350515	99	0.042733767	0.072497237	0.015971089	-0.018144877
M3909	2B	976743	0.096024006	0.278350515	99	0.042733767	0.072496591	0.024606128	0.02795521
M10197	5A	0	0.096044709	0.298969072	99	0.042733767	0.072492826	0.019190839	0.021802859
M13407	6B	512060987	0.096051852	0.453608247	99	0.042733767	0.072491527	0.021252062	-0.02414463
M12876	6A	612290726	0.096118576	0.402061856	99	0.042733767	0.0724794	0.016271657	-0.018486353
M3687	2B	38782061	0.096197528	0.494845361	99	0.042733767	0.072465063	0.018311023	-0.020803293
M12112	6A	1248869	0.096279335	0.453608247	99	0.042733767	0.072450221	0.018725198	-0.02127384
M10643	5B	72083499	0.096304518	0.226804124	99	0.042733767	0.072445655	0.0173819	-0.01974771
M6644	3A	420552380	0.09633386	0.340206186	99	0.042733767	0.072440337	0.016451154	0.018690282
M8676	4A	232125986	0.096582932	0.144329897	99	0.042733767	0.072395263	0.020933173	-0.023782338
M1672	1B	628033554	0.096588499	0.18556701	99	0.042733767	0.072394257	0.019977719	0.022696839
M7048	3B	419044180	0.096661691	0.298969072	99	0.042733767	0.072381037	0.015724021	-0.01786418
M13367	6B	672982408	0.096699237	0.020618557	99	0.042733767	0.07237426	0.045681205	-0.051898766
M5414	2D	0	0.096856867	0.371134021	99	0.042733767	0.072345838	0.026773118	-0.030417144
M1791	1B	608599570	0.096905613	0.164948454	99	0.042733767	0.072337059	0.020849988	0.02368783
M699	1A	590240846	0.09696307	0.288659794	99	0.042733767	0.072326718	0.034322194	0.038993707
M5560	2D	632239916	0.096969092	0.402061856	99	0.042733767	0.072325634	0.018202833	0.020680378
M13976	6D	82630583	0.097028975	0.319587629	99	0.042733767	0.072314864	0.015856067	-0.018014199
M1331	1B	505061911	0.097032319	0.453608247	99	0.042733767	0.072314263	0.021312758	0.024213587
M6784	3A	726107371	0.097163089	0.340206186	99	0.042733767	0.072290771	0.035373294	-0.04018787
M6296	3A	59429672	0.097259492	0.237113402	99	0.042733767	0.072273474	0.015536891	-0.01765158
M1827	1B	659387123	0.097289508	0.432989691	99	0.042733767	0.072268093	0.02422984	0.027527707
M12925	6A	617318912	0.097517799	0.453608247	99	0.042733767	0.072227224	0.023442041	0.026632682
M5177	2B	0	0.097536172	0.268041237	99	0.042733767	0.072223939	0.016762306	-0.019043784
M1048	1B	106960955	0.097624147	0.144329897	99	0.042733767	0.072208221	0.024244431	0.027544283
M3045	2A	542655244	0.097631674	0.360824742	99	0.042733767	0.072206877	0.016261443	-0.018474749
M9232	4A	26495448	0.09770362	0.422680412	99	0.042733767	0.072194036	0.013910083	0.015803352
M8153	3B	485683850	0.097704306	0.412371134	99	0.042733767	0.072193913	0.028735045	-0.032646104
M11586	5B	686989852	0.097765771	0.154639175	99	0.042733767	0.072182951	0.01951447	0.022170538
M5806	2D	0	0.09795415	0.164948454	99	0.042733767	0.072149401	0.017053626	0.019374755
M5528	2D	588540369	0.09798759	0.340206186	99	0.042733767	0.072143453	0.019726606	-0.022411548
M4730	2B	726768764	0.098002449	0.422680412	99	0.042733767	0.07214081	0.023384316	-0.0265671
M12225	6A	17652529	0.098005892	0.340206186	99	0.042733767	0.072140198	0.022459302	-0.025516184
M15151	7A	711324304	0.09807554	0.051546392	99	0.042733767	0.072127819	0.03324743	-0.037772659
M1190	1B	444058473	0.098303837	0.319587629	99	0.042733767	0.072087311	0.026381531	-0.029972259
M2205	1D	432636879	0.098337548	0.350515464	99	0.042733767	0.072081339	0.01896484	0.021546099
M3076	2A	751011782	0.09836131	0.226804124	99	0.042733767	0.07207713	0.022616815	0.025695136
M3833	2B	69275351	0.098384891	0.422680412	99	0.042733767	0.072072955	0.032793672	-0.037257141
M12526	6A	80627731	0.09858403	0.082474227	99	0.042733767	0.072037738	0.023642753	0.026860712
M6923	3B	7302120	0.098608442	0.329896907	99	0.042733767	0.072033426	0.015684999	0.017819847
M12741	6A	592551666	0.098667888	0.350515464	99	0.042733767	0.072022931	0.043719937	0.049670554
M233	1A	261892580	0.09900312	0.092783505	99	0.042733767	0.07196388	0.025790628	-0.02930093
M5340	2B	22348080	0.099089258	0.113402062	99	0.042733767	0.071948743	0.021798924	-0.024765924
M10519	5A	691737676	0.099114381	0.371134021	99	0.042733767	0.07194433	0.017192148	0.019532131
M12390	6A	473515887	0.099121046	0.288659794	99	0.042733767	0.07194316	0.022347309	-0.025388948
M9321	4A	730754928	0.099199577	0.18556701	99	0.042733767	0.071929377	0.023589638	-0.026800368
M9287	4A	51243538	0.099393107	0.422680412	99	0.042733767	0.071895462	0.026227754	-0.029797552
M702	1B	3572450	0.099404376	0.319587629	99	0.042733767	0.07189349	0.018251663	-0.020735853
M4808	2B	736110500	0.09943097	0.443298969	99	0.042733767	0.071888836	0.023783112	-0.027020176
M7636	3B	589458224	0.099431423	0.082474227	99	0.042733767	0.071888756	0.027804694	-0.031589125
M9190	4A	711885159	0.099466431	0.154639175	99	0.042733767	0.071882632	0.024036881	-0.027308484
M10287	5A	0	0.099472511	0.164948454	99	0.042733767	0.071881568	0.021568113	0.024503698
M2295	1D	1663783	0.09961344	0.474226804	99	0.042733767	0.071856939	0.021128655	-0.024004426
M8538	4A	28592618	0.099629211	0.443298969	99	0.042733767	0.071854186	0.017181584	0.019520129
M13686	6B	707207597	0.099648463	0.278350515	99	0.042733767	0.071850825	0.015955975	-0.018127705
M2811	2A	166864123	0.099660836	0.402061856	99	0.042733767	0.071848665	0.026383027	0.029973959
M8651	4A	284237985	0.099695645	0.402061856	99	0.042733767	0.071842591	0.017544537	0.019932483
M764	1B	15000455	0.099708857	0.309278351	99	0.042733767	0.071840286	0.019043384	0.021635334
M4562	2B	306065006	0.099825343	0.443298969	99	0.042733767	0.07181998	0.019027581	-0.02161738
M9487	4B	144096417	0.099841858	0.175257732	99	0.042733767	0.071817103	0.019668423	-0.022345446
M12386	6A	0	0.099897827	0.298969072	99	0.042733767	0.071807357	0.021961765	-0.024950929
M8147	3B	812610831	0.09990086	0.12371134	99	0.042733767	0.071806829	0.024482472	-0.027814724
M14953	7A	701528373	0.099928338	0.494845361	99	0.042733767	0.071802047	0.0235285	-0.026730909
M13956	6D	97102783	0.09993576	0.371134021	99	0.042733767	0.071800755	0.021065135	0.02393226
M5241	2B	31519188	0.100034571	0.329896907	99	0.042733767	0.071783572	0.048327757	-0.054905534
M4397	2B	575867441	0.100075878	0.463917526	99	0.042733767	0.071776394	0.024653196	0.028008684
M11359	5B	146891824	0.100229988	0.041237113	99	0.042733767	0.071749643	0.032807847	-0.037273246
M238	1A	342385275	0.100295207	0.06185567	99	0.042733767	0.071738336	0.024823435	0.028202094
M14295	7A	50589773	0.100345172	0.041237113	99	0.042733767	0.071729679	0.040263724	0.045743925
M8748	4A	571483237	0.100354711	0.257731959	99	0.042733767	0.071728027	0.016276934	-0.018492349
M4801	2B	744186437	0.100364508	0.474226804	99	0.042733767	0.07172633	0.023006007	0.0261373
M10950	5B	526866057	0.100470272	0.463917526	99	0.042733767	0.071708025	0.01504122	-0.017088445
M8273	3D	0	0.100510707	0.24742268	99	0.042733767	0.071701033	0.019622592	0.022293377
M10551	5B	713387538	0.100546409	0.484536082	99	0.042733767	0.071694861	0.025393642	-0.02884991
M6426	3A	371454045	0.100568689	0.144329897	99	0.042733767	0.071691011	0.019975421	0.022694229
M11250	5B	513788795	0.100600255	0.309278351	99	0.042733767	0.071685558	0.016009361	-0.018188358
M14153	7A	2862136	0.100628413	0.350515464	99	0.042733767	0.071680695	0.022232745	-0.025258791
M13904	6D	10641093	0.100894088	0.340206186	99	0.042733767	0.071634888	0.019957005	0.022673305
M5626	2D	568465158	0.101193261	0.422680412	99	0.042733767	0.071583465	0.024032279	0.027303256
M7552	3B	473710563	0.101237376	0.237113402	99	0.042733767	0.071575897	0.015384875	-0.017478874
M4761	2B	422549021	0.101247724	0.412371134	99	0.042733767	0.071574122	0.015122529	0.01718082
M15321	7B	228919573	0.101301789	0.144329897	99	0.042733767	0.071564853	0.022089383	-0.025095917
M10906	5B	471723681	0.101309285	0.103092784	99	0.042733767	0.071563568	0.025496196	0.028966423
M12987	6B	0	0.101381888	0.340206186	99	0.042733767	0.07155113	0.058173696	0.06609158
M13614	6B	675702168	0.101381888	0.340206186	99	0.042733767	0.07155113	0.058173696	-0.06609158
M1540	1B	571445284	0.10170645	0.195876289	99	0.042733767	0.071495649	0.0207417	0.023564804
M7986	3B	760719226	0.101898156	0.278350515	99	0.042733767	0.071462971	0.019294798	-0.021920968
M11525	5B	562453073	0.101916098	0.432989691	99	0.042733767	0.071459916	0.02007839	0.022811212
M11042	5B	630923004	0.101967505	0.340206186	99	0.042733767	0.071451167	0.01836759	0.02086756
M13744	6B	0	0.101974353	0.402061856	99	0.042733767	0.071450001	0.01614573	0.018343288
M12524	6A	69225171	0.102007648	0.350515464	99	0.042733767	0.071444338	0.017068798	-0.019391992
M5637	2D	0	0.102031438	0.463917526	99	0.042733767	0.071440292	0.020601598	-0.023405633
M14943	7A	487298553	0.102140988	0.350515464	99	0.042733767	0.071421676	0.046519952	0.052851673
M15372	7B	426526640	0.102163459	0.298969072	99	0.042733767	0.07141786	0.016403255	-0.018635863
M10440	5A	362054918	0.102249768	0.494845361	99	0.042733767	0.071403212	0.022731784	0.025825754
M8451	3D	543684499	0.102317587	0.463917526	99	0.042733767	0.071391712	0.021405503	-0.024318956
M15423	7B	538051135	0.102380681	0.453608247	99	0.042733767	0.071381021	0.01746855	0.019846153
M6922	3B	5973349	0.102386904	0.350515464	99	0.042733767	0.071379967	0.03331089	0.037844757
M11194	5B	423502194	0.10246936	0.268041237	99	0.042733767	0.071366007	0.017687231	0.020094598
M14004	6D	97915028	0.102496516	0.360824742	99	0.042733767	0.071361412	0.017205568	0.019547378
M8533	4A	17017869	0.102517513	0.092783505	99	0.042733767	0.07135786	0.023074719	-0.026215365
M4527	2B	547273650	0.10253161	0.237113402	99	0.042733767	0.071355476	0.017201769	-0.019543062
M6105	3A	283594306	0.102679394	0.051546392	99	0.042733767	0.071330504	0.024908849	0.028299134
M6889	3B	43544653	0.102763183	0.463917526	99	0.042733767	0.071316363	0.023189964	0.026346296
M4503	2B	647897009	0.102857881	0.350515464	99	0.042733767	0.071300397	0.032694488	0.037144457
M13719	6B	0	0.102942698	0.494845361	99	0.042733767	0.071286111	0.021365081	-0.024273032
M9453	4B	13990589	0.103043356	0.432989691	99	0.042733767	0.071269173	0.014334266	0.016285269
M9809	4D	497938965	0.103044925	0.453608247	99	0.042733767	0.071268909	0.021900785	0.024881649
M4014	2B	210256847	0.103059621	0.484536082	99	0.042733767	0.071266438	0.017932357	-0.020373088
M12642	6A	558040487	0.103066045	0.350515464	99	0.042733767	0.071265357	0.020650207	0.023460858
M679	1A	590967815	0.103279349	0.360824742	99	0.042733767	0.071229534	0.030425776	-0.034566957
M3675	2B	6409896	0.103361311	0.484536082	99	0.042733767	0.071215791	0.020859376	0.023698496
M14074	6D	599261582	0.103413473	0.24742268	99	0.042733767	0.071207051	0.018484256	-0.021000104
M6277	3A	41376359	0.103469729	0.381443299	99	0.042733767	0.07119763	0.015959105	-0.018131262
M6458	3A	570114845	0.103477664	0.309278351	99	0.042733767	0.071196302	0.018576995	0.021105466
M3837	2B	69275351	0.103501272	0.412371134	99	0.042733767	0.07119235	0.014961037	0.016997349
M6202	3A	23155739	0.103610807	0.237113402	99	0.042733767	0.07117403	0.021093838	-0.023964871
M14049	6D	217317992	0.103626024	0.443298969	99	0.042733767	0.071171487	0.021658755	-0.024606677
M8209	3B	317056611	0.103651554	0.350515464	99	0.042733767	0.071167221	0.018408729	0.020914297
M8282	3D	1203048	0.103704859	0.309278351	99	0.042733767	0.071158317	0.01594042	-0.018110033
M13402	6B	159380420	0.10375913	0.432989691	99	0.042733767	0.071149257	0.024696361	0.028057725
M7310	3B	537220619	0.103976742	0.402061856	99	0.042733767	0.071112982	0.016599809	-0.01885917
M2768	2A	125458503	0.1042687	0.237113402	99	0.042733767	0.071064447	0.019701261	-0.022382753
M11507	5B	154278470	0.104356662	0.216494845	99	0.042733767	0.071049854	0.019524582	-0.022182027
M12546	6A	483543572	0.104383099	0.175257732	99	0.042733767	0.07104547	0.020133066	0.02287333
M1095	1B	342391060	0.104465845	0.350515464	99	0.042733767	0.071031759	0.044701687	-0.050785928
M1359	1B	30505270	0.104465845	0.350515464	99	0.042733767	0.071031759	0.044701687	-0.050785928
M14016	6D	306139692	0.104470109	0.422680412	99	0.042733767	0.071031052	0.026709341	-0.030344686
M12402	6A	28011074	0.104574485	0.257731959	99	0.042733767	0.071013775	0.019578139	0.022242874
M10979	5B	487906623	0.104628941	0.278350515	99	0.042733767	0.071004768	0.019971278	-0.022689521
M6754	3A	464718567	0.10464381	0.391752577	99	0.042733767	0.07100231	0.027579007	-0.031332721
M12006	5D	552916927	0.104688763	0.298969072	99	0.042733767	0.07099488	0.017157953	0.019493282
M4246	2B	165245434	0.104789332	0.443298969	99	0.042733767	0.070978271	0.021720452	0.024676771
M10504	5A	680669676	0.104834909	0.484536082	99	0.042733767	0.070970749	0.017204219	-0.019545845
M7972	3B	146553872	0.104837167	0.494845361	99	0.042733767	0.070970377	0.01733812	-0.01969797
M3722	2B	49874133	0.104854961	0.072164948	99	0.042733767	0.070967441	0.027319385	-0.031037762
M4291	2B	143000173	0.104858257	0.443298969	99	0.042733767	0.070966898	0.021760011	-0.024721715
M5739	2D	607144225	0.10487991	0.371134021	99	0.042733767	0.070963327	0.015544862	-0.017660636
M9880	5A	0	0.105030456	0.092783505	99	0.042733767	0.070938521	0.024548752	0.027890025
M14030	6D	376894633	0.10508903	0.432989691	99	0.042733767	0.07092888	0.01965644	0.022331832
M15338	7B	382617987	0.105142913	0.360824742	99	0.042733767	0.070920017	0.016327192	-0.018549447
M6596	3A	659038151	0.105260443	0.360824742	99	0.042733767	0.070900701	0.014050577	-0.015962968
M2056	1D	41915193	0.105442871	0.278350515	99	0.042733767	0.070870768	0.015961445	0.018133919
M3726	2B	72918645	0.105443515	0.041237113	99	0.042733767	0.070870662	0.035632553	0.040482416
M12066	6A	640168516	0.105510215	0.268041237	99	0.042733767	0.070859732	0.020146705	-0.022888826
M8446	3D	728753357	0.10573621	0.474226804	99	0.042733767	0.070822756	0.022872716	0.025985867
M10308	5A	0	0.105741201	0.463917526	99	0.042733767	0.070821941	0.026869179	0.030526279
M15107	7A	732392954	0.105741201	0.463917526	99	0.042733767	0.070821941	0.026869179	0.030526279
M2838	2A	137932218	0.105754708	0.237113402	99	0.042733767	0.070819734	0.015728641	0.017869429
M1379	1B	444421058	0.105782931	0.350515464	99	0.042733767	0.070815123	0.01735095	0.019712547
M15257	7B	65660970	0.105795285	0.319587629	99	0.042733767	0.070813106	0.019250748	-0.021870922
M8805	4A	602753691	0.10582396	0.360824742	99	0.042733767	0.070808423	0.021822673	-0.024792906
M4353	2B	91206725	0.105858914	0.24742268	99	0.042733767	0.070802717	0.019276702	0.021900408
M7797	3B	729922064	0.105873572	0.422680412	99	0.042733767	0.070800325	0.025081988	-0.028495838
M11767	5B	683514701	0.105905309	0.350515464	99	0.042733767	0.070795147	0.017064817	-0.019387469
M13551	6B	439600840	0.105996316	0.226804124	99	0.042733767	0.070780308	0.021438776	-0.024356757
M6997	3B	14530080	0.10600308	0.288659794	99	0.042733767	0.070779206	0.018473588	-0.020987984
M4524	2B	635172360	0.106039893	0.360824742	99	0.042733767	0.070773208	0.018129167	0.020596685
M10846	5B	395681464	0.10605923	0.18556701	99	0.042733767	0.070770059	0.018972709	-0.021555039
M4821	2B	730646221	0.10612803	0.453608247	99	0.042733767	0.070758858	0.022548894	-0.02561797
M6983	3B	680087734	0.106178481	0.371134021	99	0.042733767	0.070750649	0.01530541	-0.017388593
M13999	6D	488198477	0.106222485	0.18556701	99	0.042733767	0.070743493	0.022382982	-0.025429477
M9411	4A	1273632	0.106226402	0.443298969	99	0.042733767	0.070742856	0.016130275	0.018325729
M12125	6A	5129543	0.106308206	0.237113402	99	0.042733767	0.070729562	0.020699798	0.023517199
M13935	6D	14987960	0.106365868	0.340206186	99	0.042733767	0.070720199	0.021909007	0.02489099
M6864	3A	0	0.106392979	0.072164948	99	0.042733767	0.070715798	0.025982204	-0.029518581
M6056	3A	0	0.106526356	0.278350515	99	0.042733767	0.070694167	0.01442234	0.016385331
M10632	5B	685117897	0.10678032	0.340206186	99	0.042733767	0.070653062	0.026779012	0.03042384
M3096	2A	610377425	0.106799404	0.360824742	99	0.042733767	0.070649977	0.014695436	-0.016695597
M10993	5B	586964666	0.106966943	0.463917526	99	0.042733767	0.070622926	0.028720272	0.03262932
M6736	3A	720367772	0.107045359	0.371134021	99	0.042733767	0.07061028	0.016065532	-0.018252173
M12701	6A	277848418	0.107100075	0.443298969	99	0.042733767	0.070601463	0.016069102	-0.018256229
M6005	2D	642133932	0.107165432	0.350515464	99	0.042733767	0.070590938	0.019503564	-0.022158148
M8145	3B	810657303	0.107194613	0.463917526	99	0.042733767	0.07058624	0.017522574	-0.01990753
M8907	4A	194668309	0.107239247	0.154639175	99	0.042733767	0.070579059	0.020717679	-0.023537513
M3869	2B	106962921	0.10724564	0.371134021	99	0.042733767	0.07057803	0.015171618	-0.017236591
M14936	7A	700849927	0.107260142	0.06185567	99	0.042733767	0.070575698	0.025593685	0.029077181
M9247	4A	718920407	0.107304732	0.360824742	99	0.042733767	0.070568528	0.036357284	-0.041305789
M9289	4A	11455079	0.107315243	0.175257732	99	0.042733767	0.070566838	0.018129672	0.020597259
M10668	5B	67969342	0.107398972	0.103092784	99	0.042733767	0.070553385	0.027819193	0.031605598
M15284	7B	125005332	0.107406365	0.319587629	99	0.042733767	0.070552198	0.015052105	0.017100811
M13760	6B	715854244	0.107410705	0.484536082	99	0.042733767	0.070551501	0.015538747	0.017653689
M590	1A	564125239	0.107507163	0.072164948	99	0.042733767	0.070536019	0.027399097	-0.031128323
M14260	7A	0	0.10751069	0.24742268	99	0.042733767	0.070535454	0.01536665	0.017458168
M13931	6D	486917435	0.107571222	0.350515464	99	0.042733767	0.070525746	0.021381516	-0.024291704
M1313	1B	348861564	0.107577502	0.103092784	99	0.042733767	0.07052474	0.020908925	-0.02375479
M6746	3A	716253361	0.10758038	0.113402062	99	0.042733767	0.070524278	0.019983549	-0.022703462
M5490	2D	75756578	0.107736261	0.030927835	99	0.042733767	0.070499311	0.036073257	-0.040983102
M5474	2D	0	0.107736261	0.030927835	99	0.042733767	0.070499311	0.036073257	0.040983102
M5480	2D	68916330	0.107736261	0.030927835	99	0.042733767	0.070499311	0.036073257	0.040983102
M11580	5B	581759209	0.107740238	0.474226804	99	0.042733767	0.070498675	0.019094667	-0.021693597
M11016	5B	485806429	0.107792982	0.134020619	99	0.042733767	0.070490236	0.020135838	-0.022876479
M6390	3A	521790629	0.107832231	0.484536082	99	0.042733767	0.07048396	0.016251579	-0.018463543
M13822	6B	0	0.107877623	0.360824742	99	0.042733767	0.070476704	0.028483729	0.032360582
M1402	1B	657569825	0.107968469	0.237113402	99	0.042733767	0.070462193	0.019369184	0.022005478
M10580	5B	0	0.107985956	0.195876289	99	0.042733767	0.070459401	0.018266299	-0.020752481
M9844	5A	6448975	0.108159458	0.371134021	99	0.042733767	0.07043173	0.017630751	-0.020030431
M2997	2A	711468133	0.108386013	0.484536082	99	0.042733767	0.070395673	0.020858004	-0.023696938
M3014	2A	706928677	0.10847567	0.494845361	99	0.042733767	0.070381427	0.017945181	-0.020387657
M9342	4A	742751401	0.108488956	0.422680412	99	0.042733767	0.070379317	0.013099136	0.014882028
M14021	6D	348660663	0.108497841	0.432989691	99	0.042733767	0.070377906	0.023289226	-0.026459068
M13710	6B	599287726	0.10857779	0.309278351	99	0.042733767	0.070365216	0.014213373	-0.016147921
M7750	3B	752319025	0.108618341	0.391752577	99	0.042733767	0.070358784	0.016821088	0.019110566
M6525	3A	639713075	0.108634896	0.463917526	99	0.042733767	0.070356159	0.017181526	-0.019520063
M4117	2B	0	0.108844844	0.020618557	99	0.042733767	0.070322904	0.047742021	-0.054240075
M7855	3B	755711290	0.109038497	0.082474227	99	0.042733767	0.070292294	0.021985952	0.024978408
M14403	7A	333433088	0.109065925	0.288659794	99	0.042733767	0.070287964	0.020834094	-0.023669774
M12132	6A	5480626	0.109250052	0.237113402	99	0.042733767	0.070258924	0.019302399	-0.021929603
M6117	3A	15478548	0.109255612	0.474226804	99	0.042733767	0.070258048	0.014358502	-0.016312803
M11910	5D	154782380	0.109393352	0.030927835	99	0.042733767	0.070236361	0.03199447	0.036349162
M7558	3B	495235808	0.109495031	0.278350515	99	0.042733767	0.070220372	0.016884826	0.019182979
M11179	5B	0	0.109496044	0.082474227	99	0.042733767	0.070220212	0.024254778	0.027556039
M7933	3B	752401287	0.109562003	0.144329897	99	0.042733767	0.070209849	0.019000813	0.021586969
M1599	1B	536709124	0.10986585	0.020618557	99	0.042733767	0.070162199	0.044268027	0.050293244
M4201	2B	562512178	0.109921334	0.412371134	99	0.042733767	0.070153513	0.029456612	0.033465882
M10521	5A	691820950	0.109956941	0.463917526	99	0.042733767	0.070147942	0.020013124	-0.022737064
M8917	4A	649883746	0.110057321	0.195876289	99	0.042733767	0.070132247	0.021489594	0.024414492
M6216	3A	170875509	0.110128346	0.24742268	99	0.042733767	0.070121152	0.017553631	-0.019942814
M12176	6A	12313676	0.110139131	0.092783505	99	0.042733767	0.070119467	0.028670322	-0.032572572
M10144	5A	478892688	0.110204105	0.432989691	99	0.042733767	0.070109325	0.020038751	0.022766178
M6443	3A	0	0.110373707	0.195876289	99	0.042733767	0.070082883	0.017113719	0.019443026
M5133	2B	779248164	0.110563704	0.381443299	99	0.042733767	0.070053314	0.02563469	-0.029123767
M14867	7A	670917940	0.110599352	0.453608247	99	0.042733767	0.070047772	0.022570265	0.02564225
M3265	2A	773406109	0.110715071	0.422680412	99	0.042733767	0.070029798	0.028979104	0.032923381
M7015	3B	17613543	0.110767663	0.422680412	99	0.042733767	0.070021635	0.015163505	-0.017227374
M12387	6A	29804894	0.110830366	0.298969072	99	0.042733767	0.07001191	0.021930284	-0.024915164
M12193	6A	150550559	0.11093026	0.391752577	99	0.042733767	0.069996428	0.026941367	0.030608293
M2127	1D	413406127	0.11100003	0.494845361	99	0.042733767	0.069985624	0.01731454	-0.019671181
M3148	2A	755807963	0.111030653	0.360824742	99	0.042733767	0.069980885	0.038382445	0.043606588
M5492	2D	79085779	0.111030653	0.360824742	99	0.042733767	0.069980885	0.038382445	0.043606588
M3050	2A	498229618	0.111030653	0.360824742	99	0.042733767	0.069980885	0.038382445	-0.043606588
M4092	2B	445251666	0.111070147	0.237113402	99	0.042733767	0.069974774	0.016485839	0.018729687
M4687	2B	704576379	0.111073281	0.278350515	99	0.042733767	0.06997429	0.020426051	-0.023206192
M5945	2D	630122654	0.11113644	0.463917526	99	0.042733767	0.069964523	0.0146042	0.016591943
M7767	3B	13505175	0.111169974	0.206185567	99	0.042733767	0.06995934	0.01695617	0.019264035
M12723	6A	584947190	0.11124287	0.237113402	99	0.042733767	0.06994808	0.019751036	-0.022439302
M4594	2B	690748766	0.111253635	0.484536082	99	0.042733767	0.069946418	0.014080737	-0.015997233
M3124	2A	748451453	0.111323963	0.226804124	99	0.042733767	0.069935563	0.016915245	0.019217539
M7146	3B	24929087	0.111441701	0.06185567	99	0.042733767	0.069917408	0.031999222	-0.036354561
M7084	3B	15205844	0.111441701	0.06185567	99	0.042733767	0.069917408	0.031999222	0.036354561
M14298	7A	15997601	0.111498024	0.092783505	99	0.042733767	0.06990873	0.025671381	-0.029165452
M1796	1B	647195583	0.111527137	0.463917526	99	0.042733767	0.069904247	0.018564425	0.021091185
M10974	5B	435043643	0.111640578	0.402061856	99	0.042733767	0.06988679	0.019343585	-0.021976395
M4776	2B	736408773	0.111712402	0.164948454	99	0.042733767	0.069875747	0.017666766	-0.020071348
M7242	3B	43051220	0.112032604	0.237113402	99	0.042733767	0.069826613	0.017729287	-0.020142379
M5113	2B	622858890	0.112100884	0.278350515	99	0.042733767	0.069816156	0.017229162	-0.019574183
M15062	7A	714349724	0.112133464	0.360824742	99	0.042733767	0.069811169	0.04501541	0.051142351
M3381	2A	585501135	0.112136101	0.371134021	99	0.042733767	0.069810766	0.022284445	-0.025317528
M12412	6A	39493610	0.11220392	0.237113402	99	0.042733767	0.06980039	0.01714901	0.019483121
M2821	2A	477627488	0.112217824	0.072164948	99	0.042733767	0.069798264	0.025841225	0.029358413
M12430	6A	104566919	0.112273031	0.319587629	99	0.042733767	0.069789824	0.017942096	-0.020384152
M1511	1B	415423029	0.112274346	0.463917526	99	0.042733767	0.069789623	0.014133803	0.016057521
M9538	4B	529563926	0.112335806	0.443298969	99	0.042733767	0.069780233	0.022247238	-0.025275257
M5788	2D	0	0.112355224	0.144329897	99	0.042733767	0.069777268	0.017334457	0.019693809
M4519	2B	680237252	0.112404267	0.154639175	99	0.042733767	0.06976978	0.019227235	-0.021844209
M12128	6A	2136438	0.112647038	0.484536082	99	0.042733767	0.06973277	0.019672292	0.022349841
M1570	1B	592833254	0.112779706	0.443298969	99	0.042733767	0.069712583	0.014843221	0.016863497
M661	1A	6070342	0.112862507	0.206185567	99	0.042733767	0.069699997	0.017637782	0.020038419
M9063	4A	590854832	0.112918346	0.319587629	99	0.042733767	0.069691515	0.017623053	-0.020021685
M14099	6D	463549451	0.112925055	0.402061856	99	0.042733767	0.069690496	0.019949864	0.022665193
M8490	3D	115087655	0.112953608	0.134020619	99	0.042733767	0.069686161	0.019796468	0.022490918
M1514	1B	593916790	0.113087455	0.319587629	99	0.042733767	0.069665856	0.017808667	0.020232563
M12618	6A	552827957	0.113228847	0.371134021	99	0.042733767	0.069644436	0.014431781	0.016396057
M8866	4A	12656052	0.113397349	0.340206186	99	0.042733767	0.069618948	0.057040395	0.064804029
M8690	4A	478992616	0.113397349	0.340206186	99	0.042733767	0.069618948	0.057040395	-0.064804029
M8857	4A	0	0.113397349	0.340206186	99	0.042733767	0.069618948	0.057040395	-0.064804029
M8919	4A	654340945	0.113397349	0.340206186	99	0.042733767	0.069618948	0.057040395	-0.064804029
M12022	5D	704165878	0.113498259	0.474226804	99	0.042733767	0.069603704	0.0202704	-0.023029356
M10971	5B	773169641	0.113537102	0.12371134	99	0.042733767	0.06959784	0.024185863	0.027477744
M6192	3A	312266867	0.113559574	0.103092784	99	0.042733767	0.069594449	0.023134658	-0.026283462
M2568	2A	59120189	0.114025474	0.412371134	99	0.042733767	0.069524307	0.014812533	-0.016828632
M10657	5B	8364049	0.114056478	0.453608247	99	0.042733767	0.069519651	0.026191719	0.029756612
M10561	5B	7710121	0.114056478	0.453608247	99	0.042733767	0.069519651	0.026191719	-0.029756612
M10578	5B	16199701	0.114056478	0.453608247	99	0.042733767	0.069519651	0.026191719	-0.029756612
M10690	5B	63844582	0.114056478	0.453608247	99	0.042733767	0.069519651	0.026191719	-0.029756612
M13645	6B	695838794	0.114103591	0.329896907	99	0.042733767	0.069512578	0.015899113	-0.018063104
M2855	2A	423291292	0.114228195	0.134020619	99	0.042733767	0.069493888	0.018470123	0.020984047
M8056	3B	11511729	0.114332196	0.06185567	99	0.042733767	0.069478305	0.02580904	0.029321848
M13100	6B	26841451	0.11434857	0.12371134	99	0.042733767	0.069475853	0.018910285	-0.02148412
M3393	2B	7067606	0.114402931	0.402061856	99	0.042733767	0.069467716	0.028896426	-0.03282945
M3398	2B	8748363	0.114402931	0.402061856	99	0.042733767	0.069467716	0.028896426	-0.03282945
M1456	1B	485555813	0.114419694	0.278350515	99	0.042733767	0.069465208	0.01991187	-0.022622028
M14961	7A	63940926	0.114510606	0.103092784	99	0.042733767	0.069451611	0.021379206	-0.02428908
M10221	5A	503872534	0.114549948	0.371134021	99	0.042733767	0.069445731	0.03663551	0.041621883
M15069	7A	718992613	0.114549948	0.371134021	99	0.042733767	0.069445731	0.03663551	-0.041621883
M15499	7B	374288014	0.114553346	0.298969072	99	0.042733767	0.069445223	0.019114178	0.021715763
M13837	6B	720519099	0.114647317	0.412371134	99	0.042733767	0.069431187	0.017892045	-0.020327289
M13628	6B	691035513	0.114727496	0.092783505	99	0.042733767	0.069419222	0.023891428	-0.027143234
M1391	1B	499899181	0.114772322	0.360824742	99	0.042733767	0.069412536	0.016621315	-0.018883603
M9731	4D	0	0.114947513	0.422680412	99	0.042733767	0.069386436	0.014557683	0.016539095
M11996	5D	548844664	0.114992299	0.381443299	99	0.042733767	0.06937977	0.013519875	-0.015360033
M14499	7A	82434448	0.115091979	0.082474227	99	0.042733767	0.069364946	0.024914366	-0.028305402
M11688	5B	635091271	0.115174166	0.072164948	99	0.042733767	0.069352734	0.024989352	-0.028390594
M4294	2B	454344609	0.115179962	0.432989691	99	0.042733767	0.069351873	0.017717712	-0.020129229
M7246	3B	0	0.11526418	0.432989691	99	0.042733767	0.06933937	0.018058608	-0.020516523
M15281	7B	127607725	0.115292988	0.350515464	99	0.042733767	0.069335096	0.018413525	-0.020919747
M3751	2B	408490253	0.115302458	0.329896907	99	0.042733767	0.069333691	0.016879374	0.019176785
M10423	5A	585454698	0.11534918	0.371134021	99	0.042733767	0.069326762	0.02528988	0.028732026
M7852	3B	730810448	0.115378236	0.237113402	99	0.042733767	0.069322454	0.019831687	-0.022530931
M700	1A	590240846	0.115421262	0.051546392	99	0.042733767	0.069316077	0.02812867	-0.031957197
M13591	6B	675246263	0.115578615	0.257731959	99	0.042733767	0.06929278	0.019056179	-0.02164987
M12135	6A	5480626	0.115640028	0.484536082	99	0.042733767	0.069283697	0.018932571	-0.021509438
M11807	5B	691196509	0.115666967	0.144329897	99	0.042733767	0.069279714	0.017361713	-0.019724774
M5055	2B	0	0.115725297	0.443298969	99	0.042733767	0.069271094	0.014860715	0.016883372
M4818	2B	606156145	0.115802571	0.340206186	99	0.042733767	0.069259683	0.016898078	-0.019198035
M14343	7A	17252435	0.115821855	0.010309278	99	0.042733767	0.069256836	0.06118499	0.069512734
M3920	2B	158649496	0.115821855	0.010309278	99	0.042733767	0.069256836	0.06118499	-0.069512734
M4673	2B	579763053	0.115873629	0.371134021	99	0.042733767	0.069249196	0.0172907	-0.019644096
M3651	2B	53458522	0.115911986	0.453608247	99	0.042733767	0.069243539	0.01429121	0.016236353
M1326	1B	16677697	0.115992113	0.422680412	99	0.042733767	0.069231727	0.023667226	-0.026888516
M7061	3B	13505109	0.116013599	0.309278351	99	0.042733767	0.069228562	0.017103716	0.019431663
M12062	6A	5854616	0.116055092	0.134020619	99	0.042733767	0.06922245	0.021514327	-0.024442591
M2992	2A	710105092	0.116132898	0.494845361	99	0.042733767	0.069210996	0.01830057	-0.020791418
M8620	4A	107154792	0.116134092	0.412371134	99	0.042733767	0.06921082	0.019278541	-0.021902498
M4498	2B	662373609	0.116255043	0.216494845	99	0.042733767	0.069193033	0.020404154	-0.023181315
M4555	2B	559193945	0.116276753	0.082474227	99	0.042733767	0.069189842	0.025817442	-0.029331393
M1148	1B	37570116	0.116297501	0.216494845	99	0.042733767	0.069186793	0.017828059	0.020254594
M7196	3B	0	0.11629867	0.216494845	99	0.042733767	0.069186622	0.018137867	-0.020606569
M13471	6B	0	0.116321616	0.350515464	99	0.042733767	0.069183251	0.046581119	0.052921165
M4708	2B	711319990	0.116321616	0.350515464	99	0.042733767	0.069183251	0.046581119	-0.052921165
M8639	4A	124226509	0.116490127	0.484536082	99	0.042733767	0.069158519	0.024192511	0.027485297
M5623	2D	490049382	0.116525255	0.453608247	99	0.042733767	0.069153368	0.020700762	0.023518294
M14528	7A	61805255	0.116670003	0.463917526	99	0.042733767	0.069132163	0.018534561	0.021057256
M1431	1B	554018133	0.116670653	0.350515464	99	0.042733767	0.069132068	0.052056076	0.059141306
M8582	4A	45140360	0.116670653	0.350515464	99	0.042733767	0.069132068	0.052056076	0.059141306
M3704	2B	66559474	0.116678197	0.082474227	99	0.042733767	0.069130964	0.022735377	-0.025829836
M592	1A	420194142	0.116722986	0.226804124	99	0.042733767	0.069124409	0.016324081	0.018545913
M6161	3A	15976105	0.116743817	0.443298969	99	0.042733767	0.069121361	0.023281961	0.026450814
M4120	2B	437379831	0.116753054	0.206185567	99	0.042733767	0.06912001	0.020062565	0.022793233
M4146	2B	184403011	0.116757774	0.164948454	99	0.042733767	0.06911932	0.02379018	0.027028206
M738	1B	0	0.116808856	0.072164948	99	0.042733767	0.06911185	0.027332142	0.031052255
M14854	7A	497467437	0.116841989	0.092783505	99	0.042733767	0.069107006	0.020652788	-0.023463791
M12873	6A	610402677	0.1169011	0.474226804	99	0.042733767	0.06909837	0.015609298	-0.017733843
M4635	2B	680082816	0.116930675	0.474226804	99	0.042733767	0.06909405	0.019604037	0.022272297
M12514	6A	143013871	0.116941585	0.164948454	99	0.042733767	0.069092457	0.018286967	0.020775962
M4464	2B	491952786	0.116967581	0.216494845	99	0.042733767	0.069088662	0.021301869	0.024201216
M5114	2B	622858890	0.116983263	0.494845361	99	0.042733767	0.069086373	0.015011655	0.017054856
M10681	5B	56912565	0.11699894	0.463917526	99	0.042733767	0.069084085	0.020895384	-0.023739406
M12026	5D	629968953	0.117011236	0.051546392	99	0.042733767	0.069082291	0.028073245	-0.031894228
M7018	3B	17613543	0.117018143	0.453608247	99	0.042733767	0.069081283	0.013782997	-0.015658968
M8830	4A	134596051	0.11702927	0.134020619	99	0.042733767	0.069079659	0.021164519	0.024045171
M11562	5B	571635045	0.117051139	0.216494845	99	0.042733767	0.069076469	0.019670084	-0.022347333
M11783	5B	682399214	0.117168452	0.453608247	99	0.042733767	0.069059368	0.027822709	-0.031609592
M10562	5B	7710121	0.117196166	0.494845361	99	0.042733767	0.06905533	0.022804871	0.025908788
M1764	1B	639941356	0.11720598	0.072164948	99	0.042733767	0.069053901	0.025413303	0.028872248
M3376	2A	646604085	0.117274489	0.319587629	99	0.042733767	0.069043926	0.019475976	0.022126805
M9317	4A	336207656	0.117284562	0.484536082	99	0.042733767	0.06904246	0.013255345	0.015059498
M14525	7A	66770346	0.117299063	0.371134021	99	0.042733767	0.06904035	0.017180334	0.019518709
M4245	2B	165245434	0.117317817	0.134020619	99	0.042733767	0.069037622	0.019886306	0.022592984
M418	1A	650844956	0.117341849	0.340206186	99	0.042733767	0.069034126	0.017749731	0.020165605
M5984	2D	646478908	0.11734971	0.319587629	99	0.042733767	0.069032982	0.018829042	-0.021391818
M11630	5B	25458537	0.117420472	0.422680412	99	0.042733767	0.069022694	0.018516429	-0.021036656
M14123	6D	473287213	0.117475063	0.350515464	99	0.042733767	0.069014762	0.040367512	0.045861839
M290	1A	375468454	0.11747968	0.164948454	99	0.042733767	0.069014091	0.021001541	0.023860012
M4986	2B	763445925	0.117529513	0.06185567	99	0.042733767	0.069006854	0.035384819	0.040200963
M6497	3A	625237502	0.117589516	0.494845361	99	0.042733767	0.068998144	0.016561345	0.018815471
M143	1A	20237352	0.117595769	0.134020619	99	0.042733767	0.068997237	0.020512508	-0.023304417
M5869	2D	239757106	0.11764071	0.402061856	99	0.042733767	0.068990717	0.026725447	0.030362985
M10644	5B	72083499	0.117703718	0.257731959	99	0.042733767	0.068981581	0.017877807	0.020311114
M14017	6D	9514548	0.117800054	0.474226804	99	0.042733767	0.068967624	0.023472063	-0.02666679
M6734	3A	720487778	0.117824986	0.164948454	99	0.042733767	0.068964014	0.016856117	0.019150363
M15333	7B	254067422	0.117841092	0.391752577	99	0.042733767	0.068961682	0.023441985	0.026632619
M10003	5A	417313880	0.117860724	0.144329897	99	0.042733767	0.06895884	0.019014613	-0.021602647
M7120	3B	26451492	0.117880385	0.051546392	99	0.042733767	0.068955995	0.028711417	0.03261926
M11920	5D	363181276	0.117927272	0.051546392	99	0.042733767	0.068949211	0.026927577	-0.030592626
M2105	1D	272756814	0.118105222	0.237113402	99	0.042733767	0.068923494	0.022253997	0.025282936
M7955	3B	759709211	0.1181711	0.453608247	99	0.042733767	0.068913984	0.019413462	-0.022055783
M14003	6D	97915028	0.118219742	0.051546392	99	0.042733767	0.068906966	0.03700174	-0.042037959
M8142	3B	810546510	0.118219742	0.051546392	99	0.042733767	0.068906966	0.03700174	0.042037959
M4913	2B	759189621	0.118273103	0.360824742	99	0.042733767	0.068899271	0.018856662	0.021423197
M321	1A	478261760	0.118330171	0.06185567	99	0.042733767	0.068891046	0.024188081	0.027480263
M8053	3B	589410123	0.118440128	0.082474227	99	0.042733767	0.068875211	0.023437729	0.026627783
M3297	2A	31477695	0.118529169	0.257731959	99	0.042733767	0.0688624	0.013602145	-0.015453501
M3762	2B	434731139	0.118576475	0.051546392	99	0.042733767	0.068855598	0.028653055	-0.032552954
M11074	5B	504309024	0.118595182	0.381443299	99	0.042733767	0.068852909	0.016163959	0.018363997
M14393	7A	29138301	0.118680874	0.371134021	99	0.042733767	0.068840597	0.030287807	-0.034410209
M2183	1D	423927982	0.118781261	0.329896907	99	0.042733767	0.068826187	0.017092332	-0.019418729
M4490	2B	643092677	0.118824282	0.134020619	99	0.042733767	0.068820016	0.020624225	0.023431339
M9718	4D	3356525	0.118916462	0.12371134	99	0.042733767	0.068806802	0.022036013	0.025035283
M8687	4A	478992616	0.118955192	0.329896907	99	0.042733767	0.068801253	0.031515213	-0.035804674
M4411	2B	630595485	0.118969603	0.371134021	99	0.042733767	0.068799189	0.022091446	0.02509826
M10528	5A	509428185	0.119062082	0.103092784	99	0.042733767	0.06878595	0.028572158	-0.032461047
M10316	5A	444140600	0.119147957	0.144329897	99	0.042733767	0.068773667	0.025288853	-0.02873086
M2132	1D	415422976	0.119174709	0.010309278	99	0.042733767	0.068769842	0.067542545	0.076735601
M242	1A	66381522	0.119174709	0.010309278	99	0.042733767	0.068769842	0.067542545	0.076735601
M10556	5B	9243036	0.119174709	0.010309278	99	0.042733767	0.068769842	0.067542545	-0.076735601
M7994	3B	763055436	0.119174709	0.010309278	99	0.042733767	0.068769842	0.067542545	-0.076735601
M7286	3B	0	0.119243307	0.298969072	99	0.042733767	0.06876004	0.019318487	0.021947881
M4070	2B	200573662	0.119470426	0.175257732	99	0.042733767	0.06872763	0.01720048	-0.019541596
M8631	4A	56189523	0.119645528	0.329896907	99	0.042733767	0.068702691	0.01684238	0.019134756
M2560	2A	95059749	0.119670185	0.422680412	99	0.042733767	0.068699182	0.019724208	0.022408824
M7278	3B	316402896	0.119671378	0.319587629	99	0.042733767	0.068699012	0.021894306	-0.024874288
M15278	7B	106862437	0.11968703	0.463917526	99	0.042733767	0.068696786	0.015242608	-0.017317243
M691	1A	491632757	0.119728403	0.391752577	99	0.042733767	0.068690901	0.016621705	0.018884046
M14862	7A	679816918	0.119747065	0.134020619	99	0.042733767	0.068688248	0.02077763	0.023605625
M2934	2A	138659939	0.119788811	0.113402062	99	0.042733767	0.068682314	0.019158141	-0.021765711
M15277	7B	106862437	0.119798513	0.453608247	99	0.042733767	0.068680935	0.013440965	-0.015270383
M6067	3A	12479120	0.119801008	0.371134021	99	0.042733767	0.06868058	0.040036536	0.045485814
M3305	2A	642872729	0.119801008	0.371134021	99	0.042733767	0.06868058	0.040036536	-0.045485814
M6053	3A	5005220	0.119801008	0.371134021	99	0.042733767	0.06868058	0.040036536	-0.045485814
M3530	2B	0	0.119808035	0.18556701	99	0.042733767	0.068679582	0.016041024	0.018224329
M5327	2B	643640677	0.119924068	0.257731959	99	0.042733767	0.068663103	0.019257817	-0.021878954
M6141	3A	538313651	0.120098367	0.360824742	99	0.042733767	0.068638383	0.015805547	-0.017956803
M12731	6A	691304428	0.120102879	0.402061856	99	0.042733767	0.068637744	0.016732975	-0.01901046
M8628	4A	428572127	0.120229911	0.402061856	99	0.042733767	0.068619754	0.015583813	0.017704889
M5761	2D	599692843	0.12023114	0.24742268	99	0.042733767	0.06861958	0.018859265	-0.021426156
M3504	2B	24847422	0.120234361	0.484536082	99	0.042733767	0.068619124	0.014028661	-0.015938069
M8989	4A	635530051	0.120365955	0.154639175	99	0.042733767	0.068600511	0.023021119	0.026154469
M14544	7A	69893167	0.120367185	0.463917526	99	0.042733767	0.068600338	0.017502478	0.019884699
M8640	4A	124226509	0.12039458	0.443298969	99	0.042733767	0.068596466	0.014927328	0.016959052
M11664	5B	0	0.120535122	0.278350515	99	0.042733767	0.068576618	0.016753559	-0.019033846
M4570	2B	664208834	0.120780803	0.288659794	99	0.042733767	0.068541985	0.016183932	-0.018386689
M13682	6B	0	0.12079251	0.175257732	99	0.042733767	0.068540336	0.018583686	0.021113068
M14253	7A	0	0.120798204	0.422680412	99	0.042733767	0.068539535	0.018387569	-0.020890257
M11183	5B	436258122	0.120899279	0.494845361	99	0.042733767	0.068525312	0.022503577	-0.025566486
M8509	3D	822833396	0.120930307	0.412371134	99	0.042733767	0.068520948	0.014318009	0.016266799
M12147	6A	8803926	0.121037154	0.278350515	99	0.042733767	0.068505931	0.019714211	0.022397466
M4857	2B	748574967	0.121083133	0.340206186	99	0.042733767	0.068499474	0.023233557	0.026395822
M912	1B	137436650	0.121094469	0.164948454	99	0.042733767	0.068497882	0.01992863	-0.022641068
M13647	6B	699020779	0.121115146	0.381443299	99	0.042733767	0.06849498	0.016094311	-0.01828487
M7341	3B	64414808	0.121135976	0.463917526	99	0.042733767	0.068492056	0.017828335	0.020254907
M1488	1B	555294084	0.121206252	0.226804124	99	0.042733767	0.068482196	0.015808364	-0.017960003
M7501	3B	392957146	0.121244798	0.051546392	99	0.042733767	0.068476791	0.029812032	0.033869677
M14773	7A	617608282	0.1213312	0.206185567	99	0.042733767	0.068464683	0.021928109	-0.024912693
M8759	4A	360831014	0.121366039	0.422680412	99	0.042733767	0.068459803	0.022403218	0.025452468
M6532	3A	640751875	0.121443081	0.164948454	99	0.042733767	0.068449017	0.018816616	0.021377701
M9428	4A	733792535	0.121461181	0.329896907	99	0.042733767	0.068446485	0.017847607	0.020276803
M9874	5A	27509864	0.121496612	0.422680412	99	0.042733767	0.068441528	0.01413272	-0.016056291
M12108	6A	586829111	0.12166026	0.06185567	99	0.042733767	0.068418655	0.027852296	-0.031643207
M5654	2D	590075755	0.121692316	0.391752577	99	0.042733767	0.068414179	0.01638194	-0.018611648
M14791	7A	618115880	0.121911695	0.298969072	99	0.042733767	0.06838358	0.01942644	0.022070527
M9645	4B	660656439	0.121944657	0.175257732	99	0.042733767	0.068378988	0.020240878	0.022995816
M9648	4B	658205308	0.121944657	0.175257732	99	0.042733767	0.068378988	0.020240878	0.022995816
M12397	6A	610402426	0.122099997	0.298969072	99	0.042733767	0.068357365	0.018267572	0.020753928
M4303	2B	216469247	0.122209904	0.432989691	99	0.042733767	0.068342085	0.027398106	0.031127198
M369	1A	502682654	0.122325075	0.278350515	99	0.042733767	0.06832609	0.018757691	0.021310756
M13629	6B	688301643	0.12234673	0.340206186	99	0.042733767	0.068323084	0.017398773	0.019766879
M3028	2A	706220041	0.122466381	0.463917526	99	0.042733767	0.068306488	0.020888809	-0.023731935
M9519	4B	535089105	0.122510001	0.494845361	99	0.042733767	0.068300442	0.01849783	0.021015526
M3657	2B	58723204	0.122550192	0.443298969	99	0.042733767	0.068294874	0.020466745	0.023252426
M1403	1B	333219089	0.122607697	0.371134021	99	0.042733767	0.068286911	0.016000833	0.018178668
M10898	5B	525773748	0.122909444	0.082474227	99	0.042733767	0.068245192	0.023673291	-0.026895407
M2703	2A	375256627	0.122980041	0.371134021	99	0.042733767	0.068235448	0.018220443	0.020700384
M3840	2B	103576566	0.12311383	0.402061856	99	0.042733767	0.068217	0.018614704	0.021148308
M9720	4D	580089641	0.123173691	0.298969072	99	0.042733767	0.068208753	0.017841669	-0.020270057
M9752	4D	64710758	0.123173691	0.298969072	99	0.042733767	0.068208753	0.017841669	0.020270057
M5059	2B	180891790	0.123227618	0.422680412	99	0.042733767	0.068201328	0.022559641	-0.025630181
M136	1A	20866783	0.123272744	0.443298969	99	0.042733767	0.068195117	0.016327571	0.018549879
M10635	5B	5146049	0.12335363	0.412371134	99	0.042733767	0.06818399	0.02681182	0.030461114
M4521	2B	669052155	0.123354458	0.298969072	99	0.042733767	0.068183876	0.019375603	-0.02201277
M13616	6B	0	0.123586434	0.329896907	99	0.042733767	0.068152013	0.017199628	0.019540629
M5633	2D	297509224	0.123593106	0.319587629	99	0.042733767	0.068151097	0.017856626	-0.020287049
M9254	4A	0	0.123725697	0.18556701	99	0.042733767	0.068132916	0.01658419	0.018841425
M3442	2B	239303228	0.12374356	0.443298969	99	0.042733767	0.068130468	0.014889341	-0.016915894
M6638	3A	695160174	0.123806729	0.06185567	99	0.042733767	0.068121816	0.033658994	0.038240241
M11367	5B	614515462	0.123807532	0.164948454	99	0.042733767	0.068121706	0.021161085	0.02404127
M4930	2B	750017811	0.123914304	0.24742268	99	0.042733767	0.068107092	0.019217673	-0.021833345
M3586	2B	40530085	0.123935736	0.288659794	99	0.042733767	0.06810416	0.014895684	0.0169231
M6900	3B	665978534	0.123957441	0.072164948	99	0.042733767	0.068101192	0.025110317	-0.028528023
M3119	2A	748288850	0.123974857	0.494845361	99	0.042733767	0.06809881	0.016827373	0.019117707
M9313	4A	730004142	0.124015961	0.18556701	99	0.042733767	0.068093191	0.018031593	-0.020485831
M5021	2B	593348369	0.124086	0.391752577	99	0.042733767	0.068083621	0.026369587	-0.029958689
M5628	2D	593032041	0.124092773	0.113402062	99	0.042733767	0.068082696	0.021930396	-0.024915291
M8224	3B	829535069	0.124227181	0.350515464	99	0.042733767	0.06806435	0.017161754	0.0194976
M9266	4A	729677674	0.124328372	0.422680412	99	0.042733767	0.068050552	0.023835085	0.027079222
M8299	3D	19553251	0.124453759	0.360824742	99	0.042733767	0.068033473	0.014971325	0.017009037
M938	1B	0	0.124522888	0.278350515	99	0.042733767	0.068024065	0.018997355	0.02158304
M3251	2A	759751315	0.12466554	0.412371134	99	0.042733767	0.06800467	0.018351786	0.020849605
M2119	1D	544724962	0.124766397	0.432989691	99	0.042733767	0.067990972	0.018025498	0.020478906
M7734	3B	696333527	0.124782272	0.360824742	99	0.042733767	0.067988817	0.016217578	0.018424914
M5500	2D	74936166	0.124898936	0.360824742	99	0.042733767	0.067972991	0.016360658	-0.018587468
M3464	2B	13418676	0.125004431	0.268041237	99	0.042733767	0.067958694	0.01727858	0.019630327
M8106	3B	0	0.125008406	0.092783505	99	0.042733767	0.067958155	0.020420047	0.023199371
M7987	3B	604660614	0.125027291	0.360824742	99	0.042733767	0.067955597	0.014659629	0.016654916
M5785	2D	598277265	0.12504772	0.360824742	99	0.042733767	0.067952831	0.015864901	-0.018024236
M9010	4A	659089834	0.125047813	0.360824742	99	0.042733767	0.067952818	0.017632496	-0.020032413
M8055	3B	11511729	0.125058677	0.371134021	99	0.042733767	0.067951347	0.032043188	0.036404511
M8025	3B	300286021	0.125058677	0.371134021	99	0.042733767	0.067951347	0.032043188	-0.036404511
M10291	5A	549041318	0.12510397	0.237113402	99	0.042733767	0.067945216	0.017648557	0.020050661
M6004	2D	22651790	0.12513711	0.144329897	99	0.042733767	0.067940732	0.020815807	0.023648997
M2865	2A	243687217	0.125194687	0.391752577	99	0.042733767	0.067932944	0.025973746	-0.029508971
M15109	7A	726770648	0.125279359	0.144329897	99	0.042733767	0.067921498	0.024113064	0.027395037
M10498	5A	495979375	0.125355227	0.134020619	99	0.042733767	0.06791125	0.021364696	-0.024272594
M12721	6A	584954409	0.125387353	0.319587629	99	0.042733767	0.067906913	0.019396881	-0.022036945
M12806	6A	689032602	0.125390801	0.309278351	99	0.042733767	0.067906448	0.025888509	-0.029412133
M10448	5A	612915484	0.12542834	0.494845361	99	0.042733767	0.067901381	0.022350321	0.02539237
M8178	3B	718878829	0.125482159	0.340206186	99	0.042733767	0.06789412	0.015778505	-0.01792608
M10330	5A	565404888	0.125513076	0.381443299	99	0.042733767	0.067889951	0.028993948	0.032940246
M1675	1B	625466708	0.125685581	0.144329897	99	0.042733767	0.067866709	0.019649333	0.022323757
M13900	6D	16512596	0.125765464	0.350515464	99	0.042733767	0.067855958	0.019691639	-0.022371822
M7140	3B	23857659	0.125906571	0.103092784	99	0.042733767	0.067836986	0.021488721	-0.0244135
M6163	3A	403940047	0.126076984	0.350515464	99	0.042733767	0.067814106	0.01582358	-0.01797729
M4546	2B	566996002	0.126134121	0.381443299	99	0.042733767	0.067806443	0.019592408	-0.022259084
M4435	2B	620850327	0.126381706	0.24742268	99	0.042733767	0.067773281	0.015684478	-0.017819255
M8573	4A	211467606	0.126428426	0.134020619	99	0.042733767	0.067767031	0.018002888	0.020453219
M9770	4D	417815115	0.126469603	0.412371134	99	0.042733767	0.067761525	0.019691503	0.022371666
M12991	6B	5555402	0.126487603	0.298969072	99	0.042733767	0.067759119	0.015088978	0.017142703
M5782	2D	611125588	0.126607877	0.360824742	99	0.042733767	0.067743051	0.015671737	0.01780478
M1476	1B	544133182	0.126624712	0.257731959	99	0.042733767	0.067740803	0.022865835	0.02597805
M533	1A	454769741	0.126719078	0.463917526	99	0.042733767	0.06772821	0.020463384	-0.023248607
M10653	5B	48874275	0.126789697	0.134020619	99	0.042733767	0.067718793	0.022587882	0.025662265
M8939	4A	673929919	0.126893684	0.432989691	99	0.042733767	0.067704938	0.022551135	0.025620517
M11935	5D	472425065	0.126920545	0.340206186	99	0.042733767	0.067701361	0.027314606	-0.031032333
M13171	6B	85384559	0.126977051	0.412371134	99	0.042733767	0.067693838	0.01418366	0.016114165
M5511	2D	82890817	0.126989177	0.12371134	99	0.042733767	0.067692225	0.021520757	0.024449896
M12254	6A	71319035	0.126992382	0.072164948	99	0.042733767	0.067691798	0.024043588	-0.027316104
M5516	2D	139037649	0.127075163	0.041237113	99	0.042733767	0.067680787	0.027303178	-0.031019349
M3368	2A	753091715	0.127098101	0.144329897	99	0.042733767	0.067677737	0.019503188	0.022157721
M9748	4D	65113876	0.127144158	0.309278351	99	0.042733767	0.067671616	0.022613282	-0.025691122
M7003	3B	17974227	0.127354603	0.360824742	99	0.042733767	0.067643676	0.028514865	0.032395956
M7071	3B	15205844	0.127369175	0.072164948	99	0.042733767	0.067641743	0.022713149	0.025804582
M11494	5B	481184562	0.127390405	0.329896907	99	0.042733767	0.067638928	0.017710742	-0.020121309
M7274	3B	49148259	0.127412507	0.257731959	99	0.042733767	0.067635998	0.014361085	0.016315738
M4809	2B	734646054	0.127569671	0.463917526	99	0.042733767	0.067615177	0.020363953	0.023135643
M4506	2B	548631440	0.127578886	0.268041237	99	0.042733767	0.067613957	0.017321099	0.019678633
M10606	5B	369428012	0.127597371	0.113402062	99	0.042733767	0.06761151	0.022370586	-0.025415393
M228	1A	256281584	0.127764892	0.443298969	99	0.042733767	0.067589354	0.014316521	-0.016265109
M3800	2B	97976141	0.127764958	0.443298969	99	0.042733767	0.067589346	0.02048373	0.023271722
M14569	7A	27346450	0.127769923	0.360824742	99	0.042733767	0.06758869	0.019189851	0.021801736
M14554	7A	66446609	0.12777603	0.195876289	99	0.042733767	0.067587883	0.014417443	-0.016379767
M14568	7A	83158962	0.127844688	0.463917526	99	0.042733767	0.067578813	0.018784104	0.021340764
M4805	2B	271099995	0.127862394	0.391752577	99	0.042733767	0.067576474	0.027259645	-0.030969891
M5087	2B	770053999	0.127866124	0.340206186	99	0.042733767	0.067575982	0.017100444	-0.019427945
M10691	5B	78260556	0.127900468	0.12371134	99	0.042733767	0.067571448	0.022183427	-0.025202761
M13380	6B	573801162	0.127954656	0.113402062	99	0.042733767	0.067564297	0.022311202	-0.025347927
M8974	4A	681683099	0.128243067	0.24742268	99	0.042733767	0.067526293	0.015358498	-0.017448907
M12067	6A	640168516	0.128464349	0.381443299	99	0.042733767	0.0674972	0.01595203	0.018123223
M1094	1B	180406792	0.12850663	0.195876289	99	0.042733767	0.067491648	0.017553164	0.019942283
M5655	2D	142549111	0.12857208	0.340206186	99	0.042733767	0.067483057	0.018888462	0.021459327
M8243	3D	0	0.12857916	0.329896907	99	0.042733767	0.067482128	0.018491217	0.021008013
M8283	3D	7272771	0.12857916	0.329896907	99	0.042733767	0.067482128	0.018491217	-0.021008013
[truncated: 13,601 more rows]
