# Supplementary material for: Genome-wide association study of drought tolerance and biomass allocation in wheat
Source: PLoS One. 2019 Dec 4;14(12):e0225383. doi: 10.1371/journal.pone.0225383 (PMC6892492; doi:10.1371/journal.pone.0225383)
Supplement: S9 Table — (CSV) [file pone.0225383.s009.csv]

SNP	Chromosome	Position	P.value	maf	nobs	Rsquare.of.Model.without.SNP	Rsquare.of.Model.with.SNP	FDR_Adjusted_P-values	effect
M6472	3A	556260082	6.46E-05	0.443298969	99	0.072323212	0.251451359	0.046901433	39.10089608
M6665	3A	701939041	0.00012326	0.412371134	99	0.072323212	0.236590251	0.050007902	51.35549999
M6529	3A	639700048	0.00025982	0.092783505	99	0.072323212	0.219776583	0.04706562	39.28380093
M6500	3A	533037386	0.000372025	0.329896907	99	0.072323212	0.211809718	0.011910557	-26.41566007
M3271	2A	768930684	0.000382896	0.24742268	99	0.072323212	0.211174063	0.037788279	28.94884333
M5573	2D	476041769	0.00061913	0.06185567	99	0.072323212	0.200649672	0.024730761	-40.69736751
M1576	1B	420600926	0.000751925	0.381443299	99	0.072323212	0.19643737	0.036446021	53.7481677
M788	1B	81660700	0.001048624	0.298969072	99	0.072323212	0.1873417	0.033969694	24.69493871
M6771	3A	0	0.001218331	0.154639175	99	0.072323212	0.186086583	0.015762086	-30.70626327
M6660	3A	699467553	0.001227657	0.391752577	99	0.072323212	0.185924315	0.050135235	48.51521916
M6249	3A	0	0.001380593	0.226804124	99	0.072323212	0.183431039	0.008312426	-22.4073429
M6638	3A	695160174	0.001497972	0.06185567	99	0.072323212	0.181703838	0.055155656	48.2961013
M6476	3A	595935042	0.001725739	0.082474227	99	0.072323212	0.178718936	0.043156795	34.92936989
M6495	3A	625237502	0.001725739	0.082474227	99	0.072323212	0.178718936	0.043156795	34.92936989
M11503	5B	142781109	0.001796374	0.237113402	99	0.072323212	0.177875556	0.012751876	-27.35289033
M783	1B	530442292	0.001825911	0.402061856	99	0.072323212	0.177533012	0.016662555	-31.70938606
M3586	2B	40530085	0.002087807	0.288659794	99	0.072323212	0.174724967	0.031385506	21.81615391
M10777	5B	398715853	0.00221749	0.402061856	99	0.072323212	0.173466703	0.011867914	-26.36815638
M15338	7B	382617987	0.002724019	0.360824742	99	0.072323212	0.169190964	0.008366397	-22.46746571
M4378	2B	649670177	0.002791542	0.206185567	99	0.072323212	0.168684149	0.035225855	26.09430207
M6877	3A	613741323	0.002797741	0.175257732	99	0.072323212	0.168638255	0.03964	-27.86695339
M4368	2B	459249657	0.002859951	0.103092784	99	0.072323212	0.168183473	0.060948353	-35.77945506
M13171	6B	85384559	0.002882945	0.412371134	99	0.072323212	0.168017965	0.089132253	19.95047667
M15414	7B	309802071	0.002993151	0.041237113	99	0.072323212	0.16724324	0.084825041	-44.64566538
M3235	2A	0	0.003019863	0.134020619	99	0.072323212	0.167059909	0.050076569	-31.74239945
M6595	3A	659038151	0.003052492	0.319587629	99	0.072323212	0.166838243	0.105918459	26.1837544
M3667	2B	64954602	0.003517832	0.206185567	99	0.072323212	0.163919735	0.034151424	-25.82886199
M6477	3A	568024952	0.00355647	0.175257732	99	0.072323212	0.163695675	0.098955558	23.59819712
M1329	1B	505061911	0.003713354	0.298969072	99	0.072323212	0.162811149	0.024324361	-22.17974587
M8903	4A	674340235	0.004142736	0.226804124	99	0.072323212	0.160575421	0.10480558	25.77050545
M4608	2B	0	0.004428937	0.360824742	99	0.072323212	0.159215024	0.089756647	20.18233481
M3651	2B	53458522	0.004580352	0.453608247	99	0.072323212	0.158531771	0.086247909	18.87942361
M8854	4A	301817649	0.004639642	0.402061856	99	0.072323212	0.158270598	0.09768707	23.12716541
M9407	4A	2052648	0.004737871	0.360824742	99	0.072323212	0.157845435	0.072765673	-40.16762007
M1570	1B	592833254	0.0048985	0.443298969	99	0.072323212	0.157169535	0.088391626	19.67545726
M9005	4A	668285271	0.005132553	0.443298969	99	0.072323212	0.156224823	0.099806277	23.9140974
M9776	4D	442739513	0.005139055	0.298969072	99	0.072323212	0.156199221	0.026104622	-22.84081639
M8895	4A	635530599	0.005167047	0.412371134	99	0.072323212	0.15608939	0.087378859	19.29938303
M1577	1B	420600926	0.005245021	0.257731959	99	0.072323212	0.155786678	0.094568293	21.96905944
M13213	6B	141656076	0.005497934	0.463917526	99	0.072323212	0.154836056	0.100428233	24.14505059
M7286	3B	0	0.005635615	0.298969072	99	0.072323212	0.154337492	0.104415288	25.62557709
M6381	3A	56776160	0.005955183	0.484536082	99	0.072323212	0.153227492	0.040272171	-28.10169966
M13595	6B	47980535	0.006140874	0.391752577	99	0.072323212	0.152610623	0.099038529	23.62900723
M6709	3A	614087671	0.0061795	0.360824742	99	0.072323212	0.152484746	0.028101245	-23.58222907
M4625	2B	599925082	0.006421401	0.453608247	99	0.072323212	0.151714585	0.035496442	-26.32831228
M12102	6A	11577996	0.0064281	0.432989691	99	0.072323212	0.151693688	0.04764886	-30.84091009
M8876	4A	248917076	0.006705329	0.329896907	99	0.072323212	0.150848253	0.027043673	-23.18951738
M13188	6B	124898676	0.006745328	0.134020619	99	0.072323212	0.150729285	0.030942542	-24.63729709
M4285	2B	154233621	0.006837682	0.381443299	99	0.072323212	0.15045738	0.050289665	-31.82152905
M15300	7B	115364020	0.006891047	0.278350515	99	0.072323212	0.150302004	0.022338076	-21.44217236
M811	1B	0	0.006924326	0.443298969	99	0.072323212	0.150205742	0.094994154	22.12719584
M6391	3A	363608529	0.007010428	0.432989691	99	0.072323212	0.149958907	0.035686501	-26.39888739
M5184	2B	781773910	0.007173116	0.422680412	99	0.072323212	0.14950102	0.016201642	-19.16350968
M5855	2D	593510796	0.007214686	0.278350515	99	0.072323212	0.149385754	0.085515895	18.6076025
M14170	7A	11374457	0.007344312	0.164948454	99	0.072323212	0.149030725	0.107018224	26.59213394
M9773	4D	24853734	0.007350965	0.319587629	99	0.072323212	0.149012679	0.051463806	-32.25752648
M8905	4A	54759330	0.007366718	0.24742268	99	0.072323212	0.148970018	0.097080082	22.90177043
M7061	3B	13505109	0.007547479	0.309278351	99	0.072323212	0.148487203	0.093469113	21.56089715
M5171	2B	557779162	0.007633479	0.391752577	99	0.072323212	0.148261711	0.079955107	16.54269627
M14352	7A	0	0.007766259	0.350515464	99	0.072323212	0.147918709	0.070439618	-39.30387809
M3624	2B	24266934	0.007814438	0.020618557	99	0.072323212	0.147795761	0.104663274	-52.01226233
M985	1B	60359807	0.007816808	0.360824742	99	0.072323212	0.147789732	0.106011977	-52.51308096
M10817	5B	43437349	0.007827992	0.082474227	99	0.072323212	0.147761315	0.115147946	29.61097059
M4594	2B	690748766	0.00788103	0.484536082	99	0.072323212	0.147627118	0.01342198	-18.13132839
M4928	2B	619961495	0.007922373	0.381443299	99	0.072323212	0.147523167	0.019751492	-20.48168748
M12270	6A	219188654	0.007961124	0.422680412	99	0.072323212	0.147426242	0.09466078	22.00340298
M11194	5B	423502194	0.008379977	0.268041237	99	0.072323212	0.146408945	0.091615135	20.87245329
M796	1B	30846941	0.008408557	0.381443299	99	0.072323212	0.146341475	0.087130422	19.20712988
M10150	5A	458524672	0.008482206	0.360824742	99	0.072323212	0.146168705	0.084016824	18.05094742
M12382	6A	0	0.008517271	0.319587629	99	0.072323212	0.146086996	0.024881789	-22.38673747
M3322	2A	598295015	0.008528495	0.020618557	99	0.072323212	0.146060917	0.107263189	-52.97769742
M13806	6B	0	0.00854287	0.082474227	99	0.072323212	0.146027569	0.112026337	28.45181332
M12142	6A	6562899	0.008584407	0.041237113	99	0.072323212	0.145931532	0.144135045	40.37484666
M6486	3A	598916422	0.008866367	0.164948454	99	0.072323212	0.145292172	0.020448523	-20.74051835
M207	1A	327958495	0.009244575	0.422680412	99	0.072323212	0.144467111	0.093370164	21.52415415
M14320	7A	0	0.009317111	0.371134021	99	0.072323212	0.144312907	0.013466715	-18.14794025
M12073	6A	1852832	0.009446458	0.371134021	99	0.072323212	0.144041013	0.077001628	-41.74057102
M3504	2B	24847422	0.009529703	0.484536082	99	0.072323212	0.143868076	0.010393764	-17.00685115
M6484	3A	598916422	0.009617812	0.350515464	99	0.072323212	0.143686744	0.021972139	-21.30628764
M10019	5A	386840959	0.00967578	0.360824742	99	0.072323212	0.143568388	0.082858217	17.6207181
M6643	3A	420552380	0.009711081	0.412371134	99	0.072323212	0.143496674	0.010053577	-16.88052827
M3843	2B	136811320	0.009746748	0.175257732	99	0.072323212	0.143424493	0.106586726	26.43190413
M8075	3B	590943948	0.009828006	0.391752577	99	0.072323212	0.143261071	0.09100607	20.64628731
M9410	4A	1273632	0.009907242	0.453608247	99	0.072323212	0.14310307	0.019003346	-20.20387599
M1572	1B	724589345	0.009975804	0.381443299	99	0.072323212	0.142967416	0.087864566	19.47974235
M3193	2A	66819913	0.010324915	0.371134021	99	0.072323212	0.142291449	0.089801328	20.19892646
M226	1A	397437989	0.010329181	0.494845361	99	0.072323212	0.142283339	0.012059917	-17.62554901
M8742	4A	537445906	0.010337733	0.268041237	99	0.072323212	0.142267088	0.084392859	18.19058146
M3625	2B	24266934	0.010391682	0.340206186	99	0.072323212	0.142164895	0.011827611	-17.53928623
M9780	4D	455472305	0.010534636	0.402061856	99	0.072323212	0.141896766	0.034723649	-26.04134846
M1832	1B	476275567	0.010755129	0.134020619	99	0.072323212	0.141490573	0.030024324	-24.29633226
M11964	5D	531606683	0.010852355	0.371134021	99	0.072323212	0.141314219	0.014027871	-18.35631605
M6473	3A	595935042	0.01086101	0.06185567	99	0.072323212	0.141298602	0.04747487	-30.77630184
M10363	5A	357707210	0.01092779	0.402061856	99	0.072323212	0.141178527	0.117389897	30.44348191
M4237	2B	693041722	0.011005526	0.453608247	99	0.072323212	0.141039716	0.016373113	-19.22718274
M6468	3A	587590385	0.01104287	0.391752577	99	0.072323212	0.140973397	0.094309465	21.87294788
M7548	3B	498344378	0.011082214	0.030927835	99	0.072323212	0.140903778	0.074765849	-40.91035184
M1303	1B	399336171	0.011086478	0.103092784	99	0.072323212	0.140896249	0.099839398	23.92639661
M745	1B	2431679	0.011388792	0.288659794	99	0.072323212	0.140369991	0.023725996	-21.95755322
M1546	1B	564637524	0.011390948	0.268041237	99	0.072323212	0.14036629	0.098453133	23.41162989
M3502	2B	0	0.011412669	0.474226804	99	0.072323212	0.140329051	0.009998215	-16.8599706
M7409	3B	70909818	0.011413047	0.072164948	99	0.072323212	0.140328404	0.039597397	-27.85113342
M4531	2B	673234348	0.011474929	0.216494845	99	0.072323212	0.140222719	0.089729426	20.17222675
M7343	3B	70108166	0.011538842	0.06185567	99	0.072323212	0.14011419	0.13188103	35.8245226
M213	1A	293607657	0.01156038	0.391752577	99	0.072323212	0.140077758	0.011501148	-17.41805958
M8731	4A	521608777	0.011590524	0.350515464	99	0.072323212	0.14002689	0.022952144	-21.67019631
M4234	2B	388778942	0.011670872	0.329896907	99	0.072323212	0.139891972	0.013052956	-17.99429776
M3296	2A	31477695	0.01167979	0.216494845	99	0.072323212	0.139877057	0.020998587	-20.94477548
M15308	7B	329791974	0.011830503	0.134020619	99	0.072323212	0.139626786	0.104648031	25.71200201
M4686	2B	704429363	0.011937406	0.494845361	99	0.072323212	0.139451279	0.092366337	21.15139972
M6881	3A	609286936	0.012220344	0.226804124	99	0.072323212	0.138994594	0.015640555	-18.95515948
M9076	4A	643624450	0.012243366	0.06185567	99	0.072323212	0.138957921	0.046559933	-30.43655512
M8816	4A	0	0.012281635	0.206185567	99	0.072323212	0.138897123	0.095535389	22.32817442
M9795	4D	481893268	0.012290688	0.12371134	99	0.072323212	0.13888277	0.028611966	-23.77187675
M5687	2D	0	0.012365524	0.298969072	99	0.072323212	0.13876454	0.025747751	-22.70829807
M11195	5B	415680465	0.012376034	0.402061856	99	0.072323212	0.138747995	0.108292802	27.06542698
M14894	7A	694675632	0.012470574	0.268041237	99	0.072323212	0.138599833	0.023106006	-21.72733009
M10511	5A	679723058	0.01257253	0.371134021	99	0.072323212	0.138441359	0.118133254	30.71951497
M3275	2A	768676643	0.012577975	0.360824742	99	0.072323212	0.138432934	0.02319234	-21.75938887
M8898	4A	0	0.012655255	0.484536082	99	0.072323212	0.138313764	0.029364706	-24.05139416
M889	1B	630581864	0.012827039	0.402061856	99	0.072323212	0.138051571	0.127701507	34.27252629
M3236	2A	0	0.01285211	0.237113402	99	0.072323212	0.138013614	0.098455571	23.41253544
M4770	2B	733890211	0.012877221	0.134020619	99	0.072323212	0.137975673	0.098591101	23.46286232
M5592	2D	739690772	0.012919276	0.494845361	99	0.072323212	0.137912305	0.083206179	17.74992785
M6510	3A	634947372	0.01304188	0.494845361	99	0.072323212	0.137728791	0.088746129	19.80709596
M7656	3B	593933727	0.013084593	0.226804124	99	0.072323212	0.137665282	0.02700067	-23.17354891
M7285	3B	0	0.013238068	0.402061856	99	0.072323212	0.137438864	0.006933116	-15.72179702
M10395	5A	577423494	0.013339546	0.309278351	99	0.072323212	0.137290662	0.011321033	-17.3511768
M667	1A	583451068	0.013440574	0.18556701	99	0.072323212	0.137144284	0.017453897	-19.62851366
M8896	4A	635530599	0.013505391	0.298969072	99	0.072323212	0.13705098	0.014221156	-18.42808941
M5403	2D	0	0.01363936	0.195876289	99	0.072323212	0.136859608	0.015039103	-18.73182033
M214	1A	293607657	0.013698695	0.371134021	99	0.072323212	0.136775478	0.082698058	17.56124554
M11934	5D	437761268	0.013743839	0.381443299	99	0.072323212	0.136711723	0.133616527	36.46897038
M12098	6A	0	0.013743839	0.381443299	99	0.072323212	0.136711723	0.133616527	36.46897038
M10425	5A	585454698	0.013861468	0.226804124	99	0.072323212	0.136546631	0.014779775	-18.63552303
M870	1B	9652067	0.013956201	0.340206186	99	0.072323212	0.136414737	0.092528903	21.21176603
M14969	7A	621160098	0.013986117	0.474226804	99	0.072323212	0.13637328	0.086430993	18.94740877
M6677	3A	708320731	0.014073237	0.402061856	99	0.072323212	0.136253081	0.052533545	-32.6547562
M5167	2B	779863093	0.014206896	0.041237113	99	0.072323212	0.136070181	0.068574583	-38.61132845
M3548	2B	0	0.014316564	0.474226804	99	0.072323212	0.135921452	0.089840363	20.21342146
M6786	3A	595019227	0.014398114	0.113402062	99	0.072323212	0.13581163	0.098448589	23.40994267
M6475	3A	595935042	0.014401973	0.391752577	99	0.072323212	0.135806449	0.114392243	29.33035302
M5781	2D	611125588	0.01449756	0.443298969	99	0.072323212	0.135678586	0.015308971	-18.83203138
M11669	5B	0	0.014575235	0.391752577	99	0.072323212	0.135575332	0.024598584	-22.28157428
M7313	3B	53963394	0.014660731	0.371134021	99	0.072323212	0.135462348	0.026559632	-23.00977671
M3681	2B	628972455	0.014870436	0.422680412	99	0.072323212	0.135188121	0.040830509	-28.30902911
M4793	2B	724734789	0.014917325	0.051546392	99	0.072323212	0.135127361	0.049727743	-31.61286842
M11153	5B	44575313	0.015072503	0.360824742	99	0.072323212	0.134927694	0.091020232	20.65154624
M12071	6A	0	0.015119851	0.041237113	99	0.072323212	0.134867201	0.138018815	38.10368656
M12082	6A	2837436	0.015119851	0.041237113	99	0.072323212	0.134867201	0.138018815	38.10368656
M6376	3A	56679772	0.015131031	0.474226804	99	0.072323212	0.134852947	0.104477857	25.648811
M3643	2B	50713994	0.015146225	0.340206186	99	0.072323212	0.134833592	0.080462594	16.73114324
M6764	3A	780291542	0.015147997	0.412371134	99	0.072323212	0.134831336	0.037326728	-27.00795826
M7362	3B	129438266	0.01532194	0.402061856	99	0.072323212	0.134611225	0.107882057	26.91290395
M14279	7A	13884507	0.015374825	0.144329897	99	0.072323212	0.134544823	0.090511169	20.46251403
M4236	2B	239570710	0.015386741	0.463917526	99	0.072323212	0.134529894	0.094621214	21.98871094
M5495	2D	77122284	0.015417381	0.453608247	99	0.072323212	0.134491564	0.092715461	21.28104104
M3990	2B	126899677	0.015472085	0.12371134	99	0.072323212	0.134423327	0.099022813	23.62317111
M1146	1B	37570116	0.015527217	0.175257732	99	0.072323212	0.134354812	0.094582254	21.97424373
M4692	2B	717237714	0.01556375	0.340206186	99	0.072323212	0.134309552	0.083680001	17.9258738
M6622	3A	547633295	0.015584434	0.164948454	99	0.072323212	0.134283976	0.09088938	20.60295656
M6418	3A	512556910	0.015588641	0.12371134	99	0.072323212	0.134278779	0.100900396	24.32038036
M7692	3B	666791858	0.015601772	0.494845361	99	0.072323212	0.134262566	0.091815368	20.94680676
M3136	2A	756929010	0.015748401	0.195876289	99	0.072323212	0.134082484	0.015510712	-18.90694438
M3604	2B	162967131	0.015794397	0.268041237	99	0.072323212	0.134026357	0.092484827	21.1953992
M82	1A	531630305	0.015918592	0.474226804	99	0.072323212	0.133875661	0.021256289	-21.04046881
M854	1B	11179602	0.016033483	0.412371134	99	0.072323212	0.133737348	0.01455448	-18.55186349
M11857	5B	703899766	0.016144436	0.463917526	99	0.072323212	0.133604761	0.023790018	-21.98132664
M7516	3B	74352754	0.01625826	0.164948454	99	0.072323212	0.133469735	0.026202349	-22.87710542
M13731	6B	707338714	0.016284303	0.206185567	99	0.072323212	0.13343898	0.02494699	-22.41094909
M4621	2B	665938471	0.01637285	0.453608247	99	0.072323212	0.133334799	0.083986429	18.03966056
M940	1B	171130928	0.01651848	0.391752577	99	0.072323212	0.133164737	0.084766559	18.3293489
M14923	7A	83446830	0.016945695	0.18556701	99	0.072323212	0.132674793	0.02015275	-20.63068786
M5170	2B	598295117	0.016962657	0.412371134	99	0.072323212	0.13265561	0.01352777	-18.17061176
M6435	3A	535005885	0.017050435	0.144329897	99	0.072323212	0.132556655	0.04046996	-28.17514497
M4315	2B	413346348	0.017118272	0.371134021	99	0.072323212	0.132480548	0.128186274	34.45253633
M12639	6A	574526055	0.017121985	0.175257732	99	0.072323212	0.132476391	0.033987746	-25.76808284
M7319	3B	44728934	0.017196911	0.391752577	99	0.072323212	0.132392716	0.103594203	25.32068062
M10588	5B	576692587	0.017262146	0.06185567	99	0.072323212	0.132320175	0.123689471	32.78272357
M7360	3B	143666791	0.017301793	0.216494845	99	0.072323212	0.132276229	0.017204664	-19.53596524
M1433	1B	529627736	0.017333895	0.103092784	99	0.072323212	0.132240723	0.100471702	24.16119217
M11901	5D	175947785	0.017368599	0.134020619	99	0.072323212	0.132202418	0.104544786	25.67366388
M14318	7A	19151787	0.017460486	0.298969072	99	0.072323212	0.132101381	0.079260787	16.28487226
M5200	2B	769502076	0.017477518	0.474226804	99	0.072323212	0.132082715	0.010544516	-17.0628303
M697	1A	491804002	0.017545124	0.463917526	99	0.072323212	0.132008809	0.024769899	-22.34518926
M5819	2D	606705458	0.017628333	0.391752577	99	0.072323212	0.131918256	0.078391649	15.96213244
M3692	2B	68579934	0.017635935	0.24742268	99	0.072323212	0.131910005	0.02206599	-21.34113753
M9347	4A	18775545	0.017636319	0.340206186	99	0.072323212	0.131909589	0.142733774	39.85450806
M5176	2B	0	0.017709043	0.474226804	99	0.072323212	0.131830852	0.00954152	-16.69038459
M11998	5D	553338175	0.017715264	0.360824742	99	0.072323212	0.131824132	0.00617409	-15.43994557
M1504	1B	559332514	0.017799268	0.257731959	99	0.072323212	0.131733638	0.088532913	19.72792166
M7258	3B	38722483	0.017801407	0.268041237	99	0.072323212	0.131731339	0.084948496	18.39690832
M546	1A	370367976	0.0178738	0.463917526	99	0.072323212	0.131653722	0.018061153	-19.85400799
M6540	3A	662527377	0.01807226	0.288659794	99	0.072323212	0.131442624	0.007398234	-15.894511
M35	1A	2185082	0.018104996	0.030927835	99	0.072323212	0.131408039	0.07186123	-39.83177004
M12030	5D	561671357	0.018129732	0.06185567	99	0.072323212	0.131381948	0.042752078	-29.02257176
M8822	4A	132119668	0.018175731	0.206185567	99	0.072323212	0.13133353	0.084554347	18.25054769
M5177	2B	0	0.01834086	0.268041237	99	0.072323212	0.131160773	0.010961209	-17.21756239
M10673	5B	353920901	0.018406949	0.319587629	99	0.072323212	0.13109209	0.01519433	-18.78946123
M7150	3B	24929087	0.01871099	0.268041237	99	0.072323212	0.130779418	0.091296539	20.75414802
M1545	1B	564637524	0.018728876	0.432989691	99	0.072323212	0.130761192	0.00768145	-15.99967855
M4804	2B	127668612	0.018940913	0.412371134	99	0.072323212	0.130546501	0.012002654	-17.6042855
M4774	2B	732350878	0.01916021	0.144329897	99	0.072323212	0.130327104	0.089575449	20.11505012
M8555	4A	137524931	0.019199226	0.494845361	99	0.072323212	0.130288347	0.094053032	21.77772588
M1431	1B	554018133	0.019238295	0.350515464	99	0.072323212	0.130249621	0.188253605	56.75753847
M8582	4A	45140360	0.019238295	0.350515464	99	0.072323212	0.130249621	0.188253605	56.75753847
M11928	5D	494878765	0.019372527	0.381443299	99	0.072323212	0.130117195	0.07800234	15.81756904
M12388	6A	29804894	0.019547902	0.402061856	99	0.072323212	0.129945628	0.027212795	-23.25231778
M4556	2B	559193945	0.019553845	0.453608247	99	0.072323212	0.129939842	0.019596544	-20.4241499
M3608	2B	43237442	0.01959213	0.268041237	99	0.072323212	0.129902616	0.016208015	-19.16587633
M6836	3A	33345150	0.019698375	0.051546392	99	0.072323212	0.12979971	0.117589412	30.51756815
M1136	1B	317186664	0.019924589	0.257731959	99	0.072323212	0.129582538	0.023261629	-21.78511822
M12100	6A	9798353	0.019927069	0.268041237	99	0.072323212	0.129580171	0.090104817	20.31162209
M7251	3B	26642568	0.019980059	0.453608247	99	0.072323212	0.129529681	0.004262978	-14.73028588
M1188	1B	444058473	0.020077027	0.051546392	99	0.072323212	0.129437653	0.114064507	29.20865374
M4999	2B	0	0.020086581	0.103092784	99	0.072323212	0.12942861	0.096788589	22.79352922
M14926	7A	699922650	0.020129759	0.298969072	99	0.072323212	0.129387803	0.082773769	17.58935947
M5811	2D	588737228	0.020149945	0.412371134	99	0.072323212	0.129368757	0.090315105	20.38970916
M6723	3A	715199344	0.02020474	0.422680412	99	0.072323212	0.129317157	0.09193284	20.99042793
M9782	4D	446124259	0.020268125	0.12371134	99	0.072323212	0.129257652	0.091072817	20.67107278
M2052	1D	43145259	0.020315832	0.371134021	99	0.072323212	0.129212994	0.011294784	-17.34142969
M13384	6B	203295082	0.020347912	0.226804124	99	0.072323212	0.129183027	0.080365913	16.69524219
M3556	2B	29045988	0.020385026	0.453608247	99	0.072323212	0.129148419	0.006511972	-15.56541222
M87	1A	14161158	0.020502203	0.463917526	99	0.072323212	0.129039589	0.091327517	20.76565126
M202	1A	52532558	0.020512621	0.484536082	99	0.072323212	0.129029945	0.077971871	15.80625461
M10270	5A	434483981	0.020544688	0.164948454	99	0.072323212	0.129000292	0.021166149	-21.0069966
M12108	6A	586829111	0.020643388	0.06185567	99	0.072323212	0.128909329	0.045390407	-30.00227125
M14446	7A	37283874	0.020682851	0.154639175	99	0.072323212	0.128873087	0.115327308	29.67757374
M14459	7A	46522324	0.020682851	0.154639175	99	0.072323212	0.128873087	0.115327308	29.67757374
M13712	6B	464521037	0.020698897	0.453608247	99	0.072323212	0.128858372	0.101147016	24.41195878
M9510	4B	481237158	0.020734218	0.288659794	99	0.072323212	0.128826023	0.075581947	14.91879622
M7760	3B	703333367	0.020740401	0.164948454	99	0.072323212	0.128820366	0.08766141	19.40430363
M2729	2A	179992753	0.020749465	0.18556701	99	0.072323212	0.128812076	0.10357838	25.314805
M5852	2D	613237565	0.020901725	0.360824742	99	0.072323212	0.128673394	0.010309649	-16.97561617
M14953	7A	701528373	0.021288425	0.494845361	99	0.072323212	0.128325913	0.027083664	-23.20436722
M6374	3A	32513740	0.021301265	0.154639175	99	0.072323212	0.12831449	0.024339631	-22.18541622
M1589	1B	573008421	0.02131575	0.432989691	99	0.072323212	0.128301612	0.085326868	18.53741023
M6844	3A	805255592	0.02136453	0.360824742	99	0.072323212	0.128258312	0.011321124	-17.35121071
M8649	4A	303362512	0.021527954	0.226804124	99	0.072323212	0.128114001	0.016837732	-19.39971122
M6799	3A	729897788	0.02156546	0.051546392	99	0.072323212	0.128081044	0.11751354	30.48939438
M13274	6B	196677969	0.021794898	0.432989691	99	0.072323212	0.127880744	0.020757633	-20.8553012
M5214	2B	22624787	0.021807155	0.216494845	99	0.072323212	0.127870107	0.082123694	17.3479651
M14471	7A	263797478	0.021826434	0.494845361	99	0.072323212	0.127853387	0.019433306	-20.36353431
M7201	3B	217469027	0.021883979	0.381443299	99	0.072323212	0.127803575	0.056994625	-34.31130395
M3942	2B	32805672	0.021993692	0.113402062	99	0.072323212	0.127708987	0.092318539	21.13365067
M4297	2B	556517600	0.021998347	0.18556701	99	0.072323212	0.127704985	0.096773402	22.78788979
M5293	2B	795769053	0.02202902	0.257731959	99	0.072323212	0.127678635	0.017763995	-19.74366352
M3297	2A	31477695	0.022136388	0.257731959	99	0.072323212	0.127586705	0.00518276	-15.07183139
M6682	3A	710340945	0.022282836	0.412371134	99	0.072323212	0.12746207	0.100904675	24.32196946
M5174	2B	0	0.022302418	0.288659794	99	0.072323212	0.127445471	0.006089792	-15.40864281
M5185	2B	31225147	0.022494859	0.381443299	99	0.072323212	0.127283151	0.010544432	-17.06279907
M6377	3A	45033405	0.022751727	0.474226804	99	0.072323212	0.127068758	0.023659044	-21.93269154
M11688	5B	635091271	0.022832885	0.072164948	99	0.072323212	0.127001551	0.035666883	-26.3916025
M6878	3A	613741323	0.022847858	0.18556701	99	0.072323212	0.12698918	0.082787384	17.59441533
M5397	2D	15630222	0.022866262	0.309278351	99	0.072323212	0.126973985	0.016060378	-19.11105379
M3285	2A	642478723	0.022934281	0.278350515	99	0.072323212	0.126917939	0.007163853	-15.80747754
M9998	5A	69102517	0.022941822	0.154639175	99	0.072323212	0.126911736	0.085865135	18.73728693
M5524	2D	168394797	0.022947993	0.371134021	99	0.072323212	0.126906662	0.089029028	19.91214566
M182	1A	344675281	0.023065066	0.412371134	99	0.072323212	0.126810666	0.076016135	15.08002486
M12013	5D	552080511	0.023279285	0.12371134	99	0.072323212	0.12663634	0.023688941	-21.9437934
M3714	2B	312640552	0.023288535	0.371134021	99	0.072323212	0.126628851	0.079787132	16.48032177
M8176	3B	818773933	0.023346561	0.494845361	99	0.072323212	0.126581942	0.027022032	-23.18148121
M4092	2B	445251666	0.023401897	0.237113402	99	0.072323212	0.126537322	0.080955927	16.91433429
M8404	3D	305579442	0.023529452	0.278350515	99	0.072323212	0.126434892	0.08192501	17.27418693
M7183	3B	30016583	0.023545879	0.443298969	99	0.072323212	0.126421744	0.074491168	14.51375389
M5544	2D	400056735	0.023564386	0.350515464	99	0.072323212	0.126406941	0.078230433	15.90226758
M5853	2D	722804527	0.023627365	0.350515464	99	0.072323212	0.126356662	0.013919449	-18.31605558
M3633	2B	31910530	0.023740949	0.309278351	99	0.072323212	0.12626634	0.088577205	19.7443687
M8683	4A	269059397	0.023936697	0.463917526	99	0.072323212	0.126111747	0.015866115	-19.03891732
M6474	3A	595935042	0.023963807	0.422680412	99	0.072323212	0.126090442	0.025231259	-22.51650769
M11146	5B	502377352	0.023972217	0.020618557	99	0.072323212	0.126083839	0.161071645	46.66397081
M13963	6D	26988617	0.023994496	0.164948454	99	0.072323212	0.126066355	0.097838071	23.18323719
M6687	3A	420562185	0.024013463	0.381443299	99	0.072323212	0.126051485	0.088101993	19.56790656
M5263	2B	800780319	0.024070479	0.268041237	99	0.072323212	0.126006859	0.08830624	19.64375057
M2776	2A	384273168	0.024120971	0.474226804	99	0.072323212	0.125967432	0.045278161	-29.96059062
M7373	3B	281007929	0.024149966	0.072164948	99	0.072323212	0.125944831	0.101638018	24.59428409
M5814	2D	593032041	0.024211204	0.381443299	99	0.072323212	0.12589719	0.080983764	16.92467102
M6442	3A	516733247	0.024321719	0.134020619	99	0.072323212	0.125811535	0.014198927	-18.419835
M1581	1B	569770619	0.024537439	0.391752577	99	0.072323212	0.12564552	0.035162122	-26.2041681
M7202	3B	217469027	0.024602109	0.030927835	99	0.072323212	0.125596052	0.13710366	37.76385919
M7068	3B	15205844	0.024610455	0.309278351	99	0.072323212	0.125589677	0.086245328	18.8784651
M8551	4A	47132358	0.024659176	0.474226804	99	0.072323212	0.125552513	0.097769787	23.15788085
M862	1B	16897282	0.02469911	0.278350515	99	0.072323212	0.125522109	0.014245567	-18.43715405
M7190	3B	692937796	0.02479895	0.072164948	99	0.072323212	0.125446322	0.10965422	27.57096708
M4940	2B	617449665	0.025015914	0.144329897	99	0.072323212	0.125282735	0.020522537	-20.76800207
M784	1B	530442292	0.025028607	0.041237113	99	0.072323212	0.125273211	0.058165494	-34.74608684
M750	1B	12374383	0.025035182	0.350515464	99	0.072323212	0.125268279	0.012048829	-17.62143199
M4685	2B	704429363	0.025041497	0.226804124	99	0.072323212	0.125263544	0.083723134	17.9418906
M15339	7B	254066318	0.025133432	0.226804124	99	0.072323212	0.125194753	0.020714798	-20.83939509
M11683	5B	631548275	0.025210846	0.06185567	99	0.072323212	0.125137033	0.039620954	-27.85988075
M4318	2B	386107660	0.025283118	0.381443299	99	0.072323212	0.125083317	0.102969657	25.08876587
M1412	1B	0	0.025300458	0.340206186	99	0.072323212	0.125070453	0.012905851	-17.93967275
M7572	3B	364670841	0.025322516	0.371134021	99	0.072323212	0.125054102	0.079996959	16.55823752
M6397	3A	473708936	0.025344074	0.484536082	99	0.072323212	0.125038137	0.082582762	17.51843214
M8814	4A	605005072	0.025375805	0.494845361	99	0.072323212	0.125014663	0.016698934	-19.34817072
M6375	3A	56679772	0.025401074	0.175257732	99	0.072323212	0.124995993	0.096078991	22.53003216
M5666	2D	0	0.025430253	0.494845361	99	0.072323212	0.124974457	0.07993887	16.53666709
M1568	1B	592833254	0.025434871	0.350515464	99	0.072323212	0.124971052	0.081363106	17.06553344
M12122	6A	0	0.02548558	0.020618557	99	0.072323212	0.124933696	0.114706037	-55.74147521
M808	1B	0	0.025503053	0.298969072	99	0.072323212	0.124920842	0.088376907	19.66999157
M5225	2B	643330937	0.025540727	0.402061856	99	0.072323212	0.12489316	0.010653779	-17.10340322
M8428	3D	446942046	0.025588799	0.474226804	99	0.072323212	0.124857899	0.016579882	-19.30396285
M195	1A	49346956	0.02564095	0.340206186	99	0.072323212	0.124819726	0.089029445	19.9123007
M14327	7A	0	0.025857403	0.340206186	99	0.072323212	0.124662162	0.210767605	65.11773738
M14383	7A	0	0.025857403	0.340206186	99	0.072323212	0.124662162	0.139956295	-65.11773738
M14415	7A	33761756	0.025857403	0.340206186	99	0.072323212	0.124662162	0.139956295	-65.11773738
M6790	3A	722406355	0.025889132	0.278350515	99	0.072323212	0.124639183	0.008066502	-16.14266095
M1532	1B	564653541	0.026035913	0.484536082	99	0.072323212	0.124533265	0.010317196	-16.97841864
M7186	3B	825539318	0.026049049	0.360824742	99	0.072323212	0.124523816	0.080207693	16.63649016
M13173	6B	102070380	0.026089725	0.340206186	99	0.072323212	0.124494592	0.079871724	16.51173356
M10240	5A	534107889	0.026091412	0.371134021	99	0.072323212	0.124493381	0.137559446	37.93310755
M14939	7A	83447347	0.026091412	0.371134021	99	0.072323212	0.124493381	0.137559446	37.93310755
M14342	7A	0	0.026091412	0.371134021	99	0.072323212	0.124493381	0.066748135	-37.93310755
M15396	7B	536555149	0.026187439	0.164948454	99	0.072323212	0.124424584	0.091170846	20.70747412
M5810	2D	580117384	0.026221702	0.371134021	99	0.072323212	0.124400101	0.067618967	-38.25647637
M14457	7A	38327804	0.026253355	0.371134021	99	0.072323212	0.124377514	0.087424238	19.3162339
M2399	2A	185003695	0.026287701	0.453608247	99	0.072323212	0.124353037	0.033324577	-25.52182632
M10586	5B	576692587	0.026321361	0.010309278	99	0.072323212	0.124329081	0.199074716	60.77577783
M5260	2B	800780319	0.026321361	0.010309278	99	0.072323212	0.124329081	0.199074716	60.77577783
M200	1A	53457937	0.026321361	0.010309278	99	0.072323212	0.124329081	0.128263405	-60.77577783
M5264	2B	800780319	0.026321361	0.010309278	99	0.072323212	0.124329081	0.128263405	-60.77577783
M2732	2A	179992753	0.026337722	0.134020619	99	0.072323212	0.124317449	0.119193253	31.11312802
M10764	5B	389160968	0.026388122	0.443298969	99	0.072323212	0.124281665	0.098940535	23.59261883
M746	1B	2431679	0.026395706	0.360824742	99	0.072323212	0.124276286	0.014605181	-18.57069068
M947	1B	711939962	0.026395706	0.360824742	99	0.072323212	0.124276286	0.014605181	-18.57069068
M11922	5D	363181276	0.026507155	0.041237113	99	0.072323212	0.124197437	0.05421676	-33.27979009
M822	1B	35453808	0.026617644	0.278350515	99	0.072323212	0.124119612	0.09120469	20.72004171
M7698	3B	669426645	0.026677751	0.360824742	99	0.072323212	0.124077418	0.125877654	33.59526873
M1935	1B	678465588	0.026695984	0.360824742	99	0.072323212	0.124064639	0.061617347	-36.02787491
M7077	3B	20999249	0.026786488	0.257731959	99	0.072323212	0.124001342	0.080665554	16.80650903
M4486	2B	69907053	0.02681187	0.257731959	99	0.072323212	0.123983631	0.088504835	19.71749532
M11935	5D	472425065	0.026815792	0.340206186	99	0.072323212	0.123980896	0.044680958	-29.73882905
M852	1B	0	0.026828442	0.432989691	99	0.072323212	0.123972077	0.094542898	21.95962961
M9739	4D	663571979	0.026843814	0.103092784	99	0.072323212	0.123961367	0.023641671	-21.92624051
M3965	2B	165049205	0.026848927	0.443298969	99	0.072323212	0.123957806	0.033918883	-25.74251201
M6348	3A	478681812	0.026885152	0.381443299	99	0.072323212	0.123932596	0.00840557	-16.2685684
M6285	3A	695818860	0.026911469	0.371134021	99	0.072323212	0.123914304	0.050243764	-31.80448424
M2994	2A	710105092	0.027048031	0.453608247	99	0.072323212	0.123819689	0.012708904	-17.86653985
M8906	4A	54759330	0.027058647	0.474226804	99	0.072323212	0.123812356	0.086250734	18.88047271
M8396	3D	220863172	0.027072377	0.216494845	99	0.072323212	0.123802875	0.082969527	17.66205104
M136	1A	20866783	0.027304549	0.443298969	99	0.072323212	0.123643325	0.080508752	16.74828314
M11687	5B	635091271	0.027311292	0.402061856	99	0.072323212	0.123638712	0.033862257	-25.72148483
M3026	2A	721105596	0.027453514	0.216494845	99	0.072323212	0.12354171	0.0806429	16.79809679
M5094	2B	774088019	0.027583924	0.329896907	99	0.072323212	0.123453231	0.016972291	-19.44967754
M12466	6A	113174438	0.027750001	0.082474227	99	0.072323212	0.123341192	0.104577355	25.68575789
M6478	3A	568024952	0.027817376	0.360824742	99	0.072323212	0.123295942	0.090254272	20.36711973
M4742	2B	730086784	0.027983382	0.195876289	99	0.072323212	0.123184943	0.009432983	-16.65008111
M4993	2B	0	0.027990564	0.12371134	99	0.072323212	0.123180157	0.090324726	20.39328165
M9827	5A	2104451	0.028052221	0.319587629	99	0.072323212	0.123139119	0.009109522	-16.52996924
M725	1B	3164636	0.028100546	0.195876289	99	0.072323212	0.123107022	0.018931783	-20.17730193
M8158	3B	75766790	0.028123377	0.195876289	99	0.072323212	0.123091878	0.085055607	18.43668221
M2319	2A	12327255	0.028160476	0.195876289	99	0.072323212	0.123067298	0.106397017	26.36145885
M14932	7A	699147857	0.0283634	0.154639175	99	0.072323212	0.122933453	0.024129233	-22.10728838
M3576	2B	33729208	0.028365952	0.288659794	99	0.072323212	0.122931776	0.082687511	17.55732911
M10845	5B	395681464	0.028415012	0.082474227	99	0.072323212	0.122899573	0.100882898	24.31388286
M3554	2B	0	0.028458535	0.422680412	99	0.072323212	0.122871053	0.014416556	-18.50064777
M4139	2B	389136726	0.028500288	0.360824742	99	0.072323212	0.122843737	0.124036368	32.91153791
M15513	7B	611339700	0.028582724	0.226804124	99	0.072323212	0.122789928	0.084851987	18.36107133
M832	1B	15519259	0.028616613	0.443298969	99	0.072323212	0.122767855	0.076202417	15.14919762
M4307	2B	454265677	0.028648207	0.391752577	99	0.072323212	0.122747303	0.092100588	21.05271829
M922	1B	0	0.028691429	0.18556701	99	0.072323212	0.122719224	0.087560788	19.36693927
M3567	2B	31608031	0.028753601	0.288659794	99	0.072323212	0.122678914	0.083790607	17.96694524
M3983	2B	163977714	0.028838446	0.402061856	99	0.072323212	0.122624052	0.010234368	-16.94766203
M11548	5B	332444025	0.02893719	0.041237113	99	0.072323212	0.122560417	0.048573677	-31.18432532
M15279	7B	113767734	0.028961087	0.319587629	99	0.072323212	0.122545052	0.014005057	-18.34784466
M9150	4A	22270015	0.028964888	0.381443299	99	0.072323212	0.122542609	0.127286554	34.11844055
M12059	6A	7901769	0.028970497	0.453608247	99	0.072323212	0.122539005	0.08622776	18.87194151
M1106	1B	100817874	0.029017669	0.216494845	99	0.072323212	0.122508724	0.089515147	20.0926579
M3563	2B	419250206	0.029163211	0.350515464	99	0.072323212	0.122415624	0.004738579	-14.90689225
M3300	2A	0	0.029168194	0.278350515	99	0.072323212	0.122412445	0.08286316	17.62255324
M14834	7A	663768828	0.029181408	0.329896907	99	0.072323212	0.122404018	0.118832855	30.9793002
M9312	4A	0	0.029364498	0.463917526	99	0.072323212	0.122287674	0.093605493	21.61153955
M15120	7A	748805327	0.029445911	0.134020619	99	0.072323212	0.122236187	0.017303864	-19.57280166
M4360	2B	549201886	0.029475316	0.484536082	99	0.072323212	0.122217628	0.016626706	-19.32135018
M8596	4A	392658355	0.029668825	0.226804124	99	0.072323212	0.122095982	0.08638843	18.93160365
M4387	2B	545940419	0.029674812	0.422680412	99	0.072323212	0.122092231	0.008050042	-16.13654879
M9263	4A	149057197	0.029756983	0.494845361	99	0.072323212	0.122040841	0.01668692	-19.34370954
M5271	2B	384628356	0.029809962	0.134020619	99	0.072323212	0.122007788	0.089950641	20.25437135
M772	1B	0	0.029846249	0.072164948	99	0.072323212	0.121985184	0.102865091	25.0499373
M6854	3A	745517190	0.029857435	0.412371134	99	0.072323212	0.121978223	0.091617905	20.8734821
M112	1A	329686048	0.029858806	0.371134021	99	0.072323212	0.12197737	0.077403894	15.5953458
M8907	4A	194668309	0.02991366	0.154639175	99	0.072323212	0.121943271	0.019358549	-20.33577446
M14445	7A	37283874	0.030033676	0.154639175	99	0.072323212	0.121868897	0.018039958	-19.84613774
M11105	5B	511603033	0.030037923	0.474226804	99	0.072323212	0.121866271	0.016112297	-19.13033288
M184	1A	41368065	0.030083206	0.288659794	99	0.072323212	0.121838295	0.08710048	19.19601163
M3380	2A	612169049	0.030085333	0.350515464	99	0.072323212	0.121836982	0.002908296	-14.22724729
M1403	1B	333219089	0.03010225	0.371134021	99	0.072323212	0.121826544	0.080272447	16.66053519
M3933	2B	657506318	0.03017057	0.360824742	99	0.072323212	0.121784448	0.00706941	-15.77240747
M13363	6B	438945063	0.030249347	0.268041237	99	0.072323212	0.121736036	0.01292143	-17.94545773
M12423	6A	54772476	0.030339837	0.12371134	99	0.072323212	0.121680589	0.097788697	23.16490271
M5740	2D	607144225	0.030381444	0.257731959	99	0.072323212	0.121655154	0.012351723	-17.7339064
M12078	6A	4290482	0.030444742	0.030927835	99	0.072323212	0.12161653	0.072714536	-40.14863121
M160	1A	15435331	0.030445673	0.340206186	99	0.072323212	0.121615963	0.013355165	-18.10651809
M3007	2A	683749636	0.030468517	0.463917526	99	0.072323212	0.121602044	0.000494379	-12.96372062
M9202	4A	714077495	0.030521258	0.391752577	99	0.072323212	0.121569954	0.083359757	17.80695658
M371	1A	499864136	0.030570957	0.422680412	99	0.072323212	0.121539768	0.074370078	14.4687889
M4559	2B	0	0.030631644	0.226804124	99	0.072323212	0.121502978	0.019521879	-20.39642447
M13272	6B	106985833	0.030655481	0.020618557	99	0.072323212	0.121488549	0.156023948	44.78959257
M4678	2B	595508003	0.030767957	0.288659794	99	0.072323212	0.121420625	0.08377754	17.96209327
M5220	2B	0	0.030801899	0.474226804	99	0.072323212	0.121400178	0.002352006	-14.02067816
M5588	2D	29408508	0.031029935	0.288659794	99	0.072323212	0.121263432	0.013942791	-18.32472321
M2693	2A	511924367	0.031036765	0.463917526	99	0.072323212	0.121259353	0.12374272	32.80249661
M12107	6A	586829111	0.031078544	0.381443299	99	0.072323212	0.121234421	0.047325197	-30.72072309
M6564	3A	650055169	0.031338094	0.092783505	99	0.072323212	0.121080325	0.032625652	-25.26229203
M660	1A	584598710	0.031410916	0.103092784	99	0.072323212	0.121037334	0.090570642	20.48459832
M1003	1B	95344234	0.031449173	0.443298969	99	0.072323212	0.121014791	0.003428453	-14.42039888
M7260	3B	47019723	0.031468065	0.432989691	99	0.072323212	0.12100367	0.080301923	16.67148089
M3876	2B	730608229	0.031576605	0.350515464	99	0.072323212	0.120939911	0.091704503	20.9056389
M4120	2B	437379831	0.031653844	0.206185567	99	0.072323212	0.12089468	0.086986285	19.15360705
M1882	1B	668913016	0.031679468	0.103092784	99	0.072323212	0.120879701	0.027280215	-23.27735335
M8306	3D	19553185	0.031686421	0.474226804	99	0.072323212	0.120875639	0.00274033	-14.16487595
M138	1A	22643068	0.031747564	0.402061856	99	0.072323212	0.120839956	0.083102703	17.71150369
M7785	3B	671011745	0.031765655	0.360824742	99	0.072323212	0.120829413	0.13374484	36.51661723
M6812	3A	600135047	0.031776431	0.113402062	99	0.072323212	0.120823135	0.019806089	-20.50196101
M123	1A	15325325	0.031873471	0.309278351	99	0.072323212	0.120766708	0.083705804	17.93545523
M6444	3A	0	0.031889342	0.329896907	99	0.072323212	0.120757496	0.082139912	17.35398731
M12081	6A	2837436	0.032026649	0.350515464	99	0.072323212	0.120678007	0.174851613	51.78093242
M12607	6A	546961492	0.032026649	0.350515464	99	0.072323212	0.120678007	0.104040303	-51.78093242
M6731	3A	717015565	0.032026649	0.350515464	99	0.072323212	0.120678007	0.104040303	-51.78093242
M7072	3B	15205844	0.032336893	0.350515464	99	0.072323212	0.120499727	0.086953565	19.14145726
M10461	5A	614408666	0.032552547	0.391752577	99	0.072323212	0.120376871	0.076522471	15.2680441
M7518	3B	426296060	0.032578401	0.103092784	99	0.072323212	0.1203622	0.020893571	-20.90577936
M7800	3B	729922064	0.032655434	0.257731959	99	0.072323212	0.120318561	0.007957264	-16.10209722
M12555	6A	39131835	0.032817831	0.371134021	99	0.072323212	0.120226922	0.008476514	-16.29491207
M139	1A	22588813	0.032820425	0.422680412	99	0.072323212	0.120225462	0.003123073	-14.30700119
M10675	5B	153502375	0.032890672	0.381443299	99	0.072323212	0.120185975	0.08378274	17.96402398
M8622	4A	127984307	0.032929933	0.474226804	99	0.072323212	0.120163945	0.014624505	-18.57786605
M6800	3A	729897788	0.033022783	0.443298969	99	0.072323212	0.120111955	0.091632345	20.87884402
M255	1A	381273827	0.033088161	0.195876289	99	0.072323212	0.120075441	0.022742495	-21.59234664
M9261	4A	410117076	0.033134329	0.164948454	99	0.072323212	0.120049703	0.015718113	-18.98395918
M9639	4B	657270812	0.033244504	0.381443299	99	0.072323212	0.119988433	0.000453697	-13.315773
M4615	2B	91473909	0.033304918	0.051546392	99	0.072323212	0.119954928	0.043832372	-29.42372095
M208	1A	327958495	0.033315435	0.268041237	99	0.072323212	0.119949102	0.080180199	16.62628051
M15310	7B	160614792	0.033395755	0.144329897	99	0.072323212	0.119904673	0.019501355	-20.38880302
M1497	1B	563779678	0.033415461	0.484536082	99	0.072323212	0.119893789	0.004240225	-14.72183686
M12077	6A	4290482	0.033435694	0.391752577	99	0.072323212	0.119882622	0.040755593	-28.2812103
M12079	6A	4290482	0.033435694	0.391752577	99	0.072323212	0.119882622	0.040755593	-28.2812103
M858	1B	36034202	0.033435715	0.288659794	99	0.072323212	0.11988261	0.013036123	-17.98804704
M6756	3A	720367772	0.033468326	0.360824742	99	0.072323212	0.119864627	0.017973874	-19.82159859
M8837	4A	530834960	0.033471586	0.206185567	99	0.072323212	0.11986283	0.087347791	19.28784637
M8853	4A	301817649	0.033471586	0.206185567	99	0.072323212	0.11986283	0.087347791	19.28784637
M5660	2D	620224144	0.033542624	0.309278351	99	0.072323212	0.119823723	0.073398092	14.10785822
M2757	2A	415062138	0.033590088	0.381443299	99	0.072323212	0.119797643	0.015056574	-18.7383079
M6596	3A	659038151	0.033686383	0.360824742	99	0.072323212	0.119744853	0.001275304	-13.62086301
M8912	4A	32202337	0.033728702	0.051546392	99	0.072323212	0.119721703	0.106188112	26.28388549
M11768	5B	683514701	0.033757083	0.309278351	99	0.072323212	0.119706195	0.080035383	16.5725056
M5815	2D	605908690	0.033820176	0.360824742	99	0.072323212	0.119671771	0.08247661	17.47901452
M3553	2B	0	0.0338282	0.298969072	99	0.072323212	0.119667398	0.010290143	-16.96837302
M5294	2B	795769053	0.033932806	0.18556701	99	0.072323212	0.119610487	0.085140318	18.46813814
M11456	5B	546831358	0.034081355	0.432989691	99	0.072323212	0.119529989	0.010711452	-17.12481936
M10619	5B	63922089	0.034087706	0.484536082	99	0.072323212	0.119526556	0.085345671	18.54439256
M713	1B	104669566	0.034256563	0.463917526	99	0.072323212	0.119435523	0.087266575	19.25768817
M1888	1B	669783975	0.03426871	0.175257732	99	0.072323212	0.119428993	0.083828036	17.98084386
M3546	2B	824552561	0.034345672	0.237113402	99	0.072323212	0.119387676	0.08424589	18.13600734
M6847	3A	738194828	0.034399991	0.422680412	99	0.072323212	0.119358574	0.026457706	-22.97192827
M4539	2B	670299111	0.034462448	0.453608247	99	0.072323212	0.119325173	0.090034102	20.28536325
M13200	6B	127471412	0.034528113	0.103092784	99	0.072323212	0.119290125	0.095298675	22.24027456
M7117	3B	472113088	0.034532237	0.381443299	99	0.072323212	0.119287926	0.050358604	-31.84712835
M3284	2A	799384357	0.034753002	0.443298969	99	0.072323212	0.119170629	0.077415586	15.59968756
M3733	2B	462272407	0.034849962	0.422680412	99	0.072323212	0.119119363	0.075180989	14.76990713
M111	1A	329686048	0.034873385	0.443298969	99	0.072323212	0.119107001	0.00550014	-15.18968545
M3354	2A	766445675	0.034920018	0.494845361	99	0.072323212	0.119082416	0.072079599	13.61825772
M3803	2B	102028478	0.035118821	0.319587629	99	0.072323212	0.118977998	0.196704085	59.89548346
M15519	7B	611412290	0.035229187	0.164948454	99	0.072323212	0.118920301	0.081958879	17.28676391
M6277	3A	41376359	0.035235494	0.381443299	99	0.072323212	0.11891701	0.006877338	-15.70108472
M13192	6B	77434370	0.035393444	0.278350515	99	0.072323212	0.118834787	0.077827381	15.75260074
M10543	5B	1261539	0.035406703	0.257731959	99	0.072323212	0.118827903	0.07645343	15.24240693
M2747	2A	507314141	0.035418889	0.432989691	99	0.072323212	0.118821578	0.092378626	21.15596297
M8282	3D	1203048	0.03544112	0.309278351	99	0.072323212	0.118810045	0.00420047	-14.70707441
M971	1B	24539459	0.035515864	0.422680412	99	0.072323212	0.118771328	0.084906413	18.38128148
M14268	7A	14297975	0.035557075	0.195876289	99	0.072323212	0.118750018	0.080779987	16.84900202
M14455	7A	38951100	0.035732779	0.402061856	99	0.072323212	0.118659456	0.077594275	15.6660409
M6247	3A	251028863	0.035733506	0.278350515	99	0.072323212	0.118659082	0.08599127	18.78412479
M6793	3A	729609868	0.035812788	0.412371134	99	0.072323212	0.118618374	0.028588879	-23.76330386
M12826	6A	605151507	0.035996854	0.371134021	99	0.072323212	0.118524234	0.076046108	15.09115463
M3987	2B	159210768	0.036032268	0.329896907	99	0.072323212	0.118506181	0.034769018	-26.05819545
M3280	2A	766594412	0.036061629	0.24742268	99	0.072323212	0.118491227	0.02165303	-21.18779179
M2762	2A	444022078	0.036091511	0.278350515	99	0.072323212	0.118476022	0.015206937	-18.79414256
M4435	2B	620850327	0.036116903	0.24742268	99	0.072323212	0.118463111	0.006095809	-15.41087724
M3126	2A	751096174	0.036133156	0.030927835	99	0.072323212	0.118454853	0.059361871	-35.1903414
M9806	4D	250840711	0.036143688	0.402061856	99	0.072323212	0.118449503	0.011036587	-17.24555264
M14400	7A	29808021	0.036309376	0.494845361	99	0.072323212	0.118365564	0.090180531	20.33973732
M11337	5B	68317422	0.036328595	0.309278351	99	0.072323212	0.118355854	0.00761105	-15.97353654
M11422	5B	440938538	0.03633024	0.134020619	99	0.072323212	0.118355023	0.088482025	19.70902519
M6390	3A	521790629	0.036361638	0.484536082	99	0.072323212	0.118339172	0.00588714	-15.33339119
M4735	2B	712959228	0.036427888	0.402061856	99	0.072323212	0.118305774	0.025763032	-22.71397267
M6014	2D	0	0.036490495	0.092783505	99	0.072323212	0.118274273	0.090809711	20.57337274
M2287	1D	0	0.036541651	0.412371134	99	0.072323212	0.118248576	0.072694318	13.84652342
M657	1A	583529682	0.03669651	0.371134021	99	0.072323212	0.118171019	0.044597514	-29.70784357
M3151	2A	0	0.036785628	0.360824742	99	0.072323212	0.118126544	0.07288047	13.91564794
M9980	5A	438355093	0.036871834	0.329896907	99	0.072323212	0.118083632	0.021350043	-21.07528256
M1075	1B	326043338	0.036928814	0.360824742	99	0.072323212	0.118055327	0.082827424	17.60928354
M8699	4A	412674356	0.037003715	0.309278351	99	0.072323212	0.118018191	0.082898882	17.63581819
M8123	3B	322735845	0.037179986	0.381443299	99	0.072323212	0.117931109	0.124027813	32.90836115
M1618	1B	628627682	0.037208798	0.474226804	99	0.072323212	0.117916917	0.079262548	16.28552627
M3736	2B	73002301	0.037216556	0.226804124	99	0.072323212	0.117913098	0.013911785	-18.31320965
M15181	7B	27599460	0.037238769	0.020618557	99	0.072323212	0.117902167	0.150705701	42.81475037
M131	1A	16933203	0.037259443	0.484536082	99	0.072323212	0.117891999	0.081507997	17.11933604
M5119	2B	37969341	0.037283328	0.391752577	99	0.072323212	0.11788026	0.007403334	-15.89640482
M14387	7A	702331405	0.037311826	0.484536082	99	0.072323212	0.117866265	0.088344752	19.65805119
M13223	6B	157131092	0.037363147	0.422680412	99	0.072323212	0.117841089	0.0158186	-19.02127359
M3587	2B	25050436	0.037434608	0.463917526	99	0.072323212	0.117806094	0.07194909	13.56979532
M15317	7B	162339083	0.037447468	0.432989691	99	0.072323212	0.117799805	0.029657825	-24.16023911
M158	1A	748472420	0.037511536	0.381443299	99	0.072323212	0.117768502	0.080323754	16.67958719
M5813	2D	593032041	0.037631005	0.484536082	99	0.072323212	0.117710285	0.0723334	13.71250258
M6816	3A	547714720	0.037726516	0.391752577	99	0.072323212	0.117663885	0.033784147	-25.69248001
M11837	5B	703289576	0.037727884	0.288659794	99	0.072323212	0.117663221	0.084972303	18.4057485
M7560	3B	479991691	0.037737668	0.082474227	99	0.072323212	0.117658475	0.10596621	26.20148615
M5180	2B	763798678	0.037761133	0.24742268	99	0.072323212	0.117647098	0.006587347	-15.59340135
M9357	4A	729926047	0.037802525	0.391752577	99	0.072323212	0.117627047	0.012225086	-17.68688192
M7867	3B	423975549	0.037834912	0.371134021	99	0.072323212	0.117611375	0.119399363	31.18966332
M14918	7A	700180481	0.037888666	0.092783505	99	0.072323212	0.117585395	0.031355787	-24.79074875
M1088	1B	262945027	0.03789696	0.103092784	99	0.072323212	0.117581391	0.091563773	20.85338112
M9411	4A	1273632	0.037956913	0.443298969	99	0.072323212	0.117552468	0.075951698	15.05609728
M3809	2B	104940392	0.037970397	0.463917526	99	0.072323212	0.117545969	0.019295045	-20.31219349
M13573	6B	667201097	0.037995102	0.402061856	99	0.072323212	0.117534069	0.003411503	-14.4141049
M4374	2B	446932626	0.038084091	0.494845361	99	0.072323212	0.117491274	0.012726838	-17.87319899
M6371	3A	202000975	0.038085293	0.474226804	99	0.072323212	0.117490697	0.017712218	-19.7244371
M1627	1B	144111278	0.038137117	0.432989691	99	0.072323212	0.117465825	0.097116021	22.91511595
M2325	2A	3539454	0.03825997	0.371134021	99	0.072323212	0.117407007	0.084896387	18.37755852
M4493	2B	655597649	0.038304234	0.453608247	99	0.072323212	0.117385864	0.02510545	-22.46979035
M15143	7A	113229613	0.038343038	0.484536082	99	0.072323212	0.117367351	0.086496828	18.97185538
M2443	2A	487248365	0.038397742	0.412371134	99	0.072323212	0.117341285	0.08993017	20.24676985
M3583	2B	40945523	0.038459571	0.298969072	99	0.072323212	0.117311873	0.075703047	14.96376462
M1110	1B	744753328	0.038491978	0.226804124	99	0.072323212	0.117296477	0.01752179	-19.65372475
M6195	3A	22831857	0.038514846	0.082474227	99	0.072323212	0.117285621	0.025105719	-22.4698904
M13296	6B	199924345	0.038675223	0.474226804	99	0.072323212	0.117209679	0.000190667	-13.21810088
M7271	3B	478901478	0.038703179	0.391752577	99	0.072323212	0.117196476	0.072448386	13.75520074
M4611	2B	0	0.038791285	0.298969072	99	0.072323212	0.117154931	0.010294173	-16.96986956
M15311	7B	162779025	0.03881335	0.164948454	99	0.072323212	0.117144542	0.026229645	-22.88724168
M8480	3D	577418701	0.038842775	0.494845361	99	0.072323212	0.117130698	0.069947944	12.82670323
M13185	6B	0	0.038883523	0.463917526	99	0.072323212	0.117111545	0.087224316	19.24199598
M8624	4A	114487333	0.038928822	0.350515464	99	0.072323212	0.117090279	0.074377064	14.47138313
M9184	4A	707676969	0.03894581	0.474226804	99	0.072323212	0.11708231	0.021282188	-21.0500859
M6680	3A	709595134	0.039000121	0.113402062	99	0.072323212	0.117056858	0.016074151	-19.11616822
M1597	1B	400016805	0.039050198	0.484536082	99	0.072323212	0.117033425	0.074046543	14.34864959
M14326	7A	19549420	0.039108322	0.134020619	99	0.072323212	0.117006266	0.013064062	-17.99842176
M6684	3A	294935009	0.039143129	0.103092784	99	0.072323212	0.116990023	0.090210584	20.35089685
M613	1A	0	0.039185958	0.453608247	99	0.072323212	0.116970057	0.071528342	13.41355783
M4844	2B	722631240	0.039187016	0.164948454	99	0.072323212	0.116969564	0.009573508	-16.70226261
M4293	2B	454344609	0.039201172	0.257731959	99	0.072323212	0.116962971	0.005168633	-15.06658577
M12101	6A	11577996	0.039221213	0.371134021	99	0.072323212	0.11695364	0.11761197	30.52594498
M14172	7A	501554142	0.039284863	0.494845361	99	0.072323212	0.116924039	0.020232108	-20.66015621
M6768	3A	489299704	0.039337532	0.092783505	99	0.072323212	0.116899584	0.022505392	-21.50430232
M5840	2D	571920602	0.039397501	0.164948454	99	0.072323212	0.116871783	0.014258215	-18.44185066
M1306	1B	378044898	0.039464704	0.391752577	99	0.072323212	0.11684068	0.003943547	-14.61167054
M14968	7A	710958106	0.03958262	0.443298969	99	0.072323212	0.116786245	0.08053166	16.75678985
M4096	2B	409664071	0.039706046	0.103092784	99	0.072323212	0.11672945	0.017665545	-19.70710579
M607	1A	623848986	0.03971141	0.412371134	99	0.072323212	0.116726986	0.000205339	-13.22354905
M7073	3B	10249151	0.039849978	0.360824742	99	0.072323212	0.116663458	0.008662011	-16.36379344
M2475	2A	21041620	0.039916789	0.474226804	99	0.072323212	0.116632911	0.051241633	-32.17502653
M5785	2D	598277265	0.039958077	0.360824742	99	0.072323212	0.116614062	0.006273002	-15.47667474
M2754	2A	413620700	0.039958752	0.175257732	99	0.072323212	0.116613754	0.04589251	-30.18871858
M14892	7A	680154265	0.039969997	0.402061856	99	0.072323212	0.116608623	0.014156615	-18.40412306
M5782	2D	611125588	0.040022305	0.360824742	99	0.072323212	0.11658478	0.076344775	15.20205965
M6843	3A	805255592	0.040084455	0.319587629	99	0.072323212	0.116556494	0.083526222	17.86877031
M1883	1B	480971976	0.040132903	0.443298969	99	0.072323212	0.116534476	0.022432366	-21.47718531
M8741	4A	537445906	0.040206588	0.474226804	99	0.072323212	0.116501044	0.079648311	16.42877265
M7894	3B	211212780	0.040212507	0.164948454	99	0.072323212	0.116498361	0.00722288	-15.82939616
M3573	2B	40354316	0.040246542	0.412371134	99	0.072323212	0.116482943	0.01215667	-17.66147679
M13276	6B	507595411	0.040264682	0.298969072	99	0.072323212	0.116474731	0.009716899	-16.75550832
M13430	6B	515186463	0.040308153	0.164948454	99	0.072323212	0.116455069	0.084998443	18.41545501
M11972	5D	531606683	0.040447738	0.484536082	99	0.072323212	0.116392085	0.075435759	14.8645117
M8997	4A	642951900	0.040452582	0.298969072	99	0.072323212	0.116389903	0.003819644	-14.56566129
M284	1A	403145168	0.040481933	0.06185567	99	0.072323212	0.11637669	0.100292734	24.09473513
M10798	5B	317179723	0.04049639	0.226804124	99	0.072323212	0.116370187	0.074590861	14.55077297
M3559	2B	0	0.040542974	0.360824742	99	0.072323212	0.116349245	0.075174403	14.76746167
M1204	1B	116830677	0.040784625	0.237113402	99	0.072323212	0.116241026	0.014094284	-18.38097744
M9331	4A	732349694	0.040803396	0.422680412	99	0.072323212	0.116232648	0.045612568	-30.08476705
M1604	1B	721298541	0.04080427	0.494845361	99	0.072323212	0.116232258	3.66E-06	-13.14865734
M2284	1D	684068520	0.040819142	0.412371134	99	0.072323212	0.116225624	0.074687189	14.5865427
M6274	3A	45708165	0.040906961	0.072164948	99	0.072323212	0.116186501	0.028630007	-23.77857606
M15003	7A	83638613	0.04097511	0.463917526	99	0.072323212	0.116156202	0.091882471	20.97172406
M5427	2D	22163591	0.041213685	0.371134021	99	0.072323212	0.116050556	0.103932335	25.44624031
M10156	5A	268836139	0.041524387	0.381443299	99	0.072323212	0.115913947	0.001539349	-13.71891153
M6663	3A	702562913	0.041594497	0.329896907	99	0.072323212	0.115883273	0.009284528	-16.59495488
M1549	1B	566170601	0.041875511	0.350515464	99	0.072323212	0.115760876	0.071208799	-39.58950088
M11049	5B	437620864	0.0418999	0.484536082	99	0.072323212	0.115750294	0.080935761	16.90684575
M5614	2D	565128626	0.042001788	0.154639175	99	0.072323212	0.115706161	0.080367466	16.69581902
M6088	3A	7019713	0.042056788	0.237113402	99	0.072323212	0.115682385	0.078016485	15.82282155
M11185	5B	513712343	0.042264198	0.134020619	99	0.072323212	0.115593021	0.024267592	-22.15866585
M12025	5D	629968953	0.042281165	0.391752577	99	0.072323212	0.115585732	0.040652712	-28.24300705
M14192	7A	13842196	0.042395323	0.360824742	99	0.072323212	0.115536768	0.073560404	-40.46272994
M11229	5B	528891865	0.042684351	0.381443299	99	0.072323212	0.115413426	0.077506	15.63326151
M8022	3B	775710699	0.042772404	0.360824742	99	0.072323212	0.115376028	0.129223421	34.83766353
M8049	3B	12179959	0.042772404	0.360824742	99	0.072323212	0.115376028	0.05841211	-34.83766353
M11938	5D	483228938	0.042773207	0.072164948	99	0.072323212	0.115375687	0.027780818	-23.46324364
M8887	4A	34990198	0.042790474	0.463917526	99	0.072323212	0.115368363	0.006711108	-15.63935816
M9606	4B	602403624	0.042794003	0.371134021	99	0.072323212	0.115366867	0.005183597	-15.07214217
M7065	3B	15124529	0.042817167	0.371134021	99	0.072323212	0.115357047	0.074258518	14.42736288
M3558	2B	19611130	0.042826118	0.268041237	99	0.072323212	0.115353254	0.080170789	16.6227863
M2064	1D	41581295	0.04291432	0.164948454	99	0.072323212	0.115315925	0.081595656	17.15188676
M13141	6B	76216654	0.042977273	0.350515464	99	0.072323212	0.115289332	0.086142026	18.84010566
M4563	2B	692625689	0.043000769	0.484536082	99	0.072323212	0.115279417	0.086959123	19.14352103
M4074	2B	236592763	0.043118876	0.463917526	99	0.072323212	0.115229667	0.000525464	-12.95217788
M5620	2D	561930556	0.043128664	0.453608247	99	0.072323212	0.115225551	0.085744357	18.69243793
M868	1B	5156091	0.043223825	0.432989691	99	0.072323212	0.115185582	0.072852904	13.90541169
M6722	3A	714455841	0.043289899	0.422680412	99	0.072323212	0.115157885	0.005859194	-15.32301412
M316	1A	481243230	0.043309419	0.340206186	99	0.072323212	0.115149712	0.005157091	-15.06229962
M4647	2B	697714139	0.043546047	0.474226804	99	0.072323212	0.115050941	0.010747858	-17.13833776
M9912	5A	36718388	0.043548569	0.020618557	99	0.072323212	0.115049891	0.143054433	39.97357963
M8607	4A	63826057	0.043614431	0.278350515	99	0.072323212	0.115022503	0.007066487	-15.77132217
M12430	6A	104566919	0.043660652	0.319587629	99	0.072323212	0.11500331	0.008854573	-16.43529799
M8874	4A	45129083	0.043749211	0.329896907	99	0.072323212	0.114966595	0.080282162	16.66414279
M15097	7A	720912669	0.043808167	0.402061856	99	0.072323212	0.114942198	0.028392475	-23.69037222
M2932	2A	690962390	0.043841052	0.072164948	99	0.072323212	0.114928604	0.096941562	22.8503335
M5641	2D	587305772	0.043886675	0.134020619	99	0.072323212	0.114909763	0.081858607	17.24952953
M6792	3A	726286900	0.044012344	0.082474227	99	0.072323212	0.114857974	0.091582755	20.86042963
M3304	2A	0	0.04404689	0.329896907	99	0.072323212	0.114843766	0.00910011	-16.52647416
M15468	7B	600008050	0.044048227	0.391752577	99	0.072323212	0.114843216	0.076070168	15.10008923
M8917	4A	649883746	0.044192303	0.195876289	99	0.072323212	0.114784088	0.086784449	19.07865877
M8880	4A	678526678	0.044258922	0.350515464	99	0.072323212	0.114756817	0.081448575	17.09727082
M14343	7A	17252435	0.044259757	0.010309278	99	0.072323212	0.114756476	0.192590699	58.3680462
M3920	2B	158649496	0.044259757	0.010309278	99	0.072323212	0.114756476	0.121779388	-58.3680462
M6741	3A	716528015	0.044346139	0.402061856	99	0.072323212	0.114721182	0.01117321	-17.29628544
M14949	7A	430047444	0.044419062	0.453608247	99	0.072323212	0.114691444	0.020248454	-20.66622606
M3512	2B	15410111	0.044518216	0.432989691	99	0.072323212	0.114651093	0.079780711	16.47793752
M13527	6B	29569629	0.044627775	0.319587629	99	0.072323212	0.114606619	0.046544561	-30.43084689
M921	1B	0	0.044634014	0.371134021	99	0.072323212	0.11460409	0.034122708	-25.81819902
M6681	3A	710340945	0.044691015	0.072164948	99	0.072323212	0.114581001	0.098735879	23.51662312
M1202	1B	489902408	0.044747327	0.164948454	99	0.072323212	0.114558222	0.083527231	17.86914528
M9643	4B	200006364	0.044790182	0.24742268	99	0.072323212	0.114540908	0.094733548	22.03042407
M6772	3A	0	0.044872662	0.226804124	99	0.072323212	0.114507633	0.086695266	19.04554195
M4332	2B	410189157	0.044936145	0.371134021	99	0.072323212	0.114482067	0.073555741	14.16639857
M5114	2B	622858890	0.044998398	0.494845361	99	0.072323212	0.114457034	0.07191712	13.55792405
M6536	3A	646854667	0.045019488	0.206185567	99	0.072323212	0.114448562	0.088565793	19.74013124
M8189	3B	0	0.04506888	0.164948454	99	0.072323212	0.114428737	0.082099126	17.33884208
M9844	5A	6448975	0.045079745	0.371134021	99	0.072323212	0.114424379	0.008268159	-16.21754309
M15299	7B	115364020	0.045110756	0.422680412	99	0.072323212	0.114411947	0.081798389	17.22716832
M3989	2B	126899677	0.045124408	0.350515464	99	0.072323212	0.114406477	0.044999116	-29.8569716
M10782	5B	410537310	0.045320974	0.144329897	99	0.072323212	0.114327912	0.087353189	19.28985069
M15362	7B	159301016	0.045320974	0.144329897	99	0.072323212	0.114327912	0.016541878	-19.28985069
M7506	3B	130253586	0.045434334	0.257731959	99	0.072323212	0.11428277	0.007075359	-15.77461659
M5922	2D	695112271	0.045482441	0.432989691	99	0.072323212	0.114263649	0.022311344	-21.43224582
M3778	2B	93408978	0.045518657	0.319587629	99	0.072323212	0.114249269	0.072590267	13.80788569
M3503	2B	24847422	0.045553056	0.484536082	99	0.072323212	0.114235622	0.000809428	-12.84673257
M15356	7B	286275361	0.045565138	0.12371134	99	0.072323212	0.11423083	0.092650206	21.2568099
M15405	7B	509576259	0.045565138	0.12371134	99	0.072323212	0.11423083	0.021838896	-21.2568099
M9362	4A	734002470	0.045659658	0.103092784	99	0.072323212	0.114193398	0.120095489	31.44815833
M8939	4A	673929919	0.045661667	0.432989691	99	0.072323212	0.114192604	0.093807827	21.68667327
M4422	2B	619000495	0.045714616	0.360824742	99	0.072323212	0.114171672	0.071830141	13.52562565
M197	1A	50833300	0.045765691	0.288659794	99	0.072323212	0.114151506	0.011828176	-17.53949592
M8071	3B	748377576	0.045915865	0.422680412	99	0.072323212	0.114092351	0.026378711	-22.94259479
M142	1A	159684705	0.045953724	0.18556701	99	0.072323212	0.11407747	0.077407373	15.59663777
M6483	3A	598916422	0.045971302	0.494845361	99	0.072323212	0.114070566	0.079364569	16.32341004
M11476	5B	549587494	0.046033399	0.474226804	99	0.072323212	0.114046198	0.011852032	-17.54835438
M9843	5A	6448975	0.046062992	0.329896907	99	0.072323212	0.114034597	0.011074642	-17.2596839
M4509	2B	668683546	0.046175318	0.463917526	99	0.072323212	0.113990637	0.020834271	-20.88375931
M6712	3A	715352220	0.046176052	0.484536082	99	0.072323212	0.11399035	0.069614695	12.70295683
M8222	3B	404215451	0.046310988	0.237113402	99	0.072323212	0.113937694	0.076290091	15.18175385
M9023	4A	79942437	0.04634213	0.216494845	99	0.072323212	0.113925565	0.009140856	-16.5416044
M13128	6B	76722170	0.046343586	0.329896907	99	0.072323212	0.113924998	0.006768038	-15.660498
M11662	5B	203695574	0.046430586	0.288659794	99	0.072323212	0.113891161	0.003886611	-14.59052835
M5745	2D	601206508	0.046434535	0.381443299	99	0.072323212	0.113889626	0.076508831	15.26297912
M1292	1B	394858638	0.046485241	0.082474227	99	0.072323212	0.113869938	0.093272898	21.48803618
M7107	3B	23684392	0.0468263	0.298969072	99	0.072323212	0.113738107	0.074698324	14.59067753
M7059	3B	13505109	0.046865858	0.309278351	99	0.072323212	0.113722884	0.142046908	39.59945194
M3006	2A	709730810	0.046883007	0.257731959	99	0.072323212	0.113716288	0.074217136	14.4119965
M1368	1B	392431722	0.046886333	0.041237113	99	0.072323212	0.113715009	0.042608892	-28.96940194
M6409	3A	397200871	0.046894078	0.092783505	99	0.072323212	0.113712031	0.039682709	-27.88281245
M10378	5A	569288642	0.046979611	0.24742268	99	0.072323212	0.113679183	0.004833535	-14.94215272
M11995	5D	548844664	0.047072707	0.391752577	99	0.072323212	0.113643502	0.000516212	-13.33898657
M2760	2A	437977326	0.047084384	0.206185567	99	0.072323212	0.113639032	0.023245772	-21.77923005
M6850	3A	725268290	0.047120637	0.412371134	99	0.072323212	0.113625162	0.023678941	-21.94008
M6057	3A	8862385	0.047295892	0.195876289	99	0.072323212	0.113558271	0.005457245	-15.17375715
M1361	1B	691739942	0.047322113	0.371134021	99	0.072323212	0.113548286	0.121107355	31.82389776
M1095	1B	342391060	0.047454002	0.350515464	99	0.072323212	0.113498151	0.07523593	-41.08490883
M1359	1B	30505270	0.047454002	0.350515464	99	0.072323212	0.113498151	0.07523593	-41.08490883
M817	1B	21249692	0.047509495	0.298969072	99	0.072323212	0.113477102	0.075631883	14.93733921
M8088	3B	0	0.047597377	0.463917526	99	0.072323212	0.11344382	0.072544016	13.79071128
M4376	2B	309304504	0.047754837	0.474226804	99	0.072323212	0.113384354	0.022504244	-21.50387579
M14367	7A	20403281	0.047804666	0.206185567	99	0.072323212	0.113365579	0.013528374	-18.17083611
M6479	3A	568024952	0.047825358	0.391752577	99	0.072323212	0.113357789	0.081207067	17.00759078
M6508	3A	614763369	0.047887166	0.402061856	99	0.072323212	0.113334541	0.011804215	-17.53059838
M8063	3B	748377632	0.048030924	0.432989691	99	0.072323212	0.113280593	0.023640985	-21.92598594
M14255	7A	0	0.048042971	0.340206186	99	0.072323212	0.11327608	0.111829255	-54.67323009
M14453	7A	38241544	0.048048213	0.350515464	99	0.072323212	0.113274117	0.004133104	-14.68205925
M6244	3A	11980146	0.04813407	0.103092784	99	0.072323212	0.113241993	0.093516546	21.57851061
M3964	2B	165049205	0.048274518	0.092783505	99	0.072323212	0.113189575	0.096994228	22.86989011
M5172	2B	557779162	0.048448364	0.381443299	99	0.072323212	0.113124919	0.069036207	12.48814478
M5042	2B	749345224	0.048510572	0.494845361	99	0.072323212	0.113101844	0.00319047	-14.33202771
M8678	4A	374355718	0.048699936	0.484536082	99	0.072323212	0.113031796	0.010132456	-16.90981854
M15170	7B	66548049	0.048700018	0.18556701	99	0.072323212	0.113031765	0.076096056	15.10970204
M7300	3B	19380506	0.048753579	0.24742268	99	0.072323212	0.113012006	0.078109123	15.857221
M6349	3A	141003106	0.048818913	0.432989691	99	0.072323212	0.112987934	0.000404015	-13.2973244
M3742	2B	48838344	0.048844523	0.494845361	99	0.072323212	0.112978508	0.017854604	-19.77730976
M3496	2B	14418775	0.048861821	0.216494845	99	0.072323212	0.112972144	0.005061639	-15.0268552
M2000	1D	11639501	0.049015187	0.453608247	99	0.072323212	0.112915827	0.001555887	-13.72505266
M8856	4A	483683726	0.049177089	0.474226804	99	0.072323212	0.112856581	0.069326627	12.59598743
M3564	2B	419250206	0.049282994	0.432989691	99	0.072323212	0.112817939	0.003808732	-14.56160926
M15162	7B	673044	0.049388343	0.422680412	99	0.072323212	0.112779589	0.012232664	-17.68969598
M6044	3A	10346880	0.049465998	0.144329897	99	0.072323212	0.112751377	0.087521778	19.35245363
M653	1A	7014108	0.049477348	0.309278351	99	0.072323212	0.112747258	0.002243287	-13.98030727
M10411	5A	575237635	0.049578764	0.371134021	99	0.072323212	0.112710493	0.073031714	13.97180995
M14271	7A	9517687	0.049709926	0.463917526	99	0.072323212	0.112663066	0.010711094	-17.12468637
M7860	3B	559227303	0.049760199	0.18556701	99	0.072323212	0.112644923	0.077859036	15.76435554
M3698	2B	68756048	0.049820917	0.371134021	99	0.072323212	0.112623037	0.071866034	13.538954
M8861	4A	690323784	0.049894196	0.329896907	99	0.072323212	0.112596661	0.078223831	15.89981593
M169	1A	2874382	0.050253081	0.402061856	99	0.072323212	0.112468085	0.08558203	18.63216031
M4294	2B	454344609	0.050580903	0.432989691	99	0.072323212	0.112351497	0.00601558	-15.38108545
M14850	7A	666793570	0.050623483	0.412371134	99	0.072323212	0.112336414	0.071180402	13.28435611
M14999	7A	722383511	0.050755839	0.463917526	99	0.072323212	0.112289615	0.024742953	-22.33518338
M3798	2B	262262279	0.050981027	0.391752577	99	0.072323212	0.112210293	0.073555142	14.16617611
M14312	7A	455466428	0.050983417	0.340206186	99	0.072323212	0.112209453	0.086871184	19.11086622
M3883	2B	133979532	0.050984061	0.360824742	99	0.072323212	0.112209227	0.071096627	13.25324735
M3545	2B	824552561	0.051008265	0.432989691	99	0.072323212	0.112200724	0.080934206	16.90626859
M4781	2B	724734855	0.051052718	0.381443299	99	0.072323212	0.112185119	0.073837602	14.27106295
M6781	3A	719820906	0.051117301	0.329896907	99	0.072323212	0.112162474	0.081194453	17.00290698
M7040	3B	17613543	0.051121301	0.360824742	99	0.072323212	0.112161072	0.072616233	13.81752787
M12505	6A	266941848	0.051141948	0.319587629	99	0.072323212	0.11215384	0.086325846	18.90836405
M7154	3B	24262407	0.051212034	0.319587629	99	0.072323212	0.112129312	0.103718545	25.36685299
M7575	3B	747801855	0.051263275	0.360824742	99	0.072323212	0.112111403	0.077045278	15.46217993
M8885	4A	631976712	0.051376086	0.360824742	99	0.072323212	0.112072041	0.079065362	16.21230436
M134	1A	46292062	0.05164646	0.402061856	99	0.072323212	0.111978081	0.070582842	13.06246186
M6241	3A	24744356	0.051750501	0.443298969	99	0.072323212	0.111942066	0.014200118	-18.42027724
M9961	5A	99461147	0.05178086	0.350515464	99	0.072323212	0.111931572	0.071273517	13.31893273
M6733	3A	720487778	0.051972288	0.144329897	99	0.072323212	0.111865551	0.009407936	-16.64078019
M2819	2A	559553702	0.052120402	0.134020619	99	0.072323212	0.111814648	0.07947768	16.36541188
M1895	1B	573814914	0.05217923	0.298969072	99	0.072323212	0.111794474	0.072680204	13.84128237
M3615	2B	48138841	0.052225378	0.391752577	99	0.072323212	0.111778665	0.009271212	-16.59001002
M5600	2D	665523602	0.052326383	0.12371134	99	0.072323212	0.111744116	0.017162029	-19.52013354
M6403	3A	512326769	0.052524416	0.360824742	99	0.072323212	0.111676587	0.050690518	-31.97037903
M7287	3B	50022030	0.052533985	0.443298969	99	0.072323212	0.111673331	0.006718953	-15.64227116
M3653	2B	53458522	0.052546076	0.453608247	99	0.072323212	0.111669218	0.000509039	-12.95827693
M209	1A	135164309	0.052664207	0.453608247	99	0.072323212	0.111629084	0.07135693	13.34990671
M9813	4D	507006414	0.0530084	0.257731959	99	0.072323212	0.111512697	0.081151788	16.98706378
M11156	5B	528222137	0.053011922	0.06185567	99	0.072323212	0.11151151	0.10019858	24.05977254
M5741	2D	598804526	0.053056178	0.195876289	99	0.072323212	0.111496605	0.017219067	-19.54131359
M6112	3A	30196842	0.053168854	0.443298969	99	0.072323212	0.111458718	0.067863668	12.05274214
M1037	1B	92259228	0.053207643	0.329896907	99	0.072323212	0.111445695	0.027212211	-23.25210102
M4495	2B	555576973	0.053267937	0.340206186	99	0.072323212	0.111425473	0.004786615	-14.92472983
M5857	2D	603508254	0.053403989	0.319587629	99	0.072323212	0.111379932	0.073974022	14.32172001
M809	1B	0	0.05363348	0.494845361	99	0.072323212	0.111303397	0.075324448	14.82317818
M4765	2B	599789141	0.053636624	0.412371134	99	0.072323212	0.111302351	0.087099781	19.19575196
M10820	5B	408228341	0.053716112	0.443298969	99	0.072323212	0.111275926	0.00526758	-15.10332792
M3085	2A	606133132	0.053830827	0.494845361	99	0.072323212	0.111237864	0.013090882	-18.00838088
M749	1B	12374383	0.053841234	0.371134021	99	0.072323212	0.111234415	0.079807534	16.48789768
M13182	6B	93428436	0.054147378	0.350515464	99	0.072323212	0.111133285	0.074451856	14.49915586
M4467	2B	636117660	0.054148551	0.484536082	99	0.072323212	0.111132899	0.007453089	-15.91488029
M181	1A	344675281	0.054173678	0.412371134	99	0.072323212	0.111124626	3.67E-05	-13.13366478
M13064	6B	32616023	0.054182076	0.329896907	99	0.072323212	0.111121862	0.075302455	14.81501166
M6226	3A	116123448	0.054211299	0.371134021	99	0.072323212	0.111112248	0.008216925	-16.19851831
M4601	2B	551450193	0.054265363	0.206185567	99	0.072323212	0.111094475	0.074306203	14.44507016
M3729	2B	78873105	0.054320752	0.412371134	99	0.072323212	0.111076287	0.099615994	23.84343904
M14861	7A	679816918	0.054327913	0.350515464	99	0.072323212	0.111073937	0.140425608	38.99740907
M7348	3B	444842198	0.054327913	0.350515464	99	0.072323212	0.111073937	0.140425608	38.99740907
M14837	7A	96059619	0.054327913	0.350515464	99	0.072323212	0.111073937	0.069614297	-38.99740907
M14841	7A	671752070	0.054327913	0.350515464	99	0.072323212	0.111073937	0.069614297	-38.99740907
M13714	6B	0	0.054458723	0.391752577	99	0.072323212	0.111031067	0.102787954	25.02129369
M4956	2B	762916610	0.05463566	0.164948454	99	0.072323212	0.110973258	0.01222346	-17.68627801
M15277	7B	106862437	0.054677539	0.453608247	99	0.072323212	0.110959604	0.0026464	-12.16460338
M1814	1B	656450092	0.05487197	0.453608247	99	0.072323212	0.110896363	0.092024101	21.02431625
M2335	2A	12351854	0.054873124	0.474226804	99	0.072323212	0.110895989	0.038885114	-27.58663895
M1901	1B	602910762	0.054910914	0.463917526	99	0.072323212	0.110883725	0.073940054	14.30910679
M14300	7A	17197201	0.054954757	0.412371134	99	0.072323212	0.110869509	0.084350428	18.17482566
M3108	2A	740354177	0.0549619	0.237113402	99	0.072323212	0.110867195	0.073799816	14.25703182
M3042	2A	721963875	0.054998852	0.309278351	99	0.072323212	0.110855224	0.071429192	13.37674007
M15008	7A	711957235	0.055135599	0.268041237	99	0.072323212	0.110811	0.081841772	17.24327791
M5473	2D	0	0.055168589	0.381443299	99	0.072323212	0.110800349	0.024881553	-22.38665012
M9918	5A	39747060	0.055195765	0.402061856	99	0.072323212	0.11079158	0.067502728	11.91871318
M3919	2B	158649496	0.055226749	0.453608247	99	0.072323212	0.110781588	0.018800221	-20.12844858
M15555	7B	670917940	0.055356335	0.474226804	99	0.072323212	0.110739864	0.000154314	-13.08999792
M15361	7B	159301016	0.055370488	0.474226804	99	0.072323212	0.110735313	0.013834723	-18.28459393
M8916	4A	330012453	0.055395954	0.298969072	99	0.072323212	0.110727128	0.030276289	-24.3898952
M9688	4B	0	0.055550143	0.402061856	99	0.072323212	0.110677657	0.008694956	-16.37602687
M13871	6D	4373922	0.055556854	0.175257732	99	0.072323212	0.110675507	0.014187299	-18.41551705
M6763	3A	780291542	0.055575112	0.072164948	99	0.072323212	0.11066966	0.02265717	-21.56066228
M1602	1B	591090372	0.055655807	0.391752577	99	0.072323212	0.110643841	0.003917818	-14.60211653
M14269	7A	9517687	0.055666997	0.453608247	99	0.072323212	0.110640264	0.009667211	-16.73705784
M8915	4A	330012453	0.055710423	0.041237113	99	0.072323212	0.110626388	0.108449463	27.12360043
M9010	4A	659089834	0.055717668	0.360824742	99	0.072323212	0.110624075	0.009014058	-16.49452025
M5252	2B	790887920	0.055765893	0.103092784	99	0.072323212	0.110608683	0.020587358	-20.79207218
M14922	7A	699917597	0.05579693	0.092783505	99	0.072323212	0.110598784	0.093725512	21.65610678
M12526	6A	80627731	0.055806955	0.082474227	99	0.072323212	0.110595588	0.089874277	20.22601482
M15402	7B	511064939	0.055825108	0.360824742	99	0.072323212	0.110589802	0.048821511	-31.27635458
M9349	4A	738890239	0.055882184	0.422680412	99	0.072323212	0.110571624	0.079878554	16.51426983
M13116	6B	29774522	0.05588712	0.422680412	99	0.072323212	0.110570053	0.073772389	14.24684723
M2173	1D	415773502	0.056044129	0.402061856	99	0.072323212	0.110520156	0.01425941	-18.44229409
M9208	4A	23628409	0.056094007	0.329896907	99	0.072323212	0.110504336	0.002208016	-13.96720989
M8072	3B	748377576	0.056140908	0.257731959	99	0.072323212	0.110489474	0.076046784	15.09140582
M4761	2B	422549021	0.056217485	0.412371134	99	0.072323212	0.110465238	0.07008808	12.8787404
M6320	3A	434822187	0.056256891	0.391752577	99	0.072323212	0.11045278	0.008913006	-16.45699638
M9002	4A	702393879	0.056261901	0.432989691	99	0.072323212	0.110451197	0.077946123	15.79669371
M7141	3B	111372477	0.056288579	0.412371134	99	0.072323212	0.110442769	0.007091112	-15.78046616
M117	1A	112441140	0.056342707	0.422680412	99	0.072323212	0.110425683	0.010720959	-17.1283493
M12948	6A	613308063	0.056352895	0.082474227	99	0.072323212	0.110422469	0.088755211	19.81046851
M6838	3A	374475866	0.056355208	0.154639175	99	0.072323212	0.110421739	0.005682128	-15.25726372
M8890	4A	747299239	0.056435138	0.484536082	99	0.072323212	0.110396546	0.003062805	-14.28462171
M938	1B	0	0.0564429	0.278350515	99	0.072323212	0.110394102	0.081319498	17.0493402
M3607	2B	43237442	0.056449241	0.432989691	99	0.072323212	0.110392105	0.0081568	-16.17619182
M14440	7A	36512654	0.056494676	0.484536082	99	0.072323212	0.110377806	0.028595308	-23.76569087
M14008	6D	89723576	0.056498797	0.340206186	99	0.072323212	0.110376509	0.179739281	53.59588626
M14190	7A	20772971	0.056498797	0.340206186	99	0.072323212	0.110376509	0.10892797	-53.59588626
M8612	4A	110875760	0.056533617	0.309278351	99	0.072323212	0.11036556	0.006847578	-15.69003398
M10083	5A	0	0.056646558	0.350515464	99	0.072323212	0.110330095	0.07207939	13.61818015
M9047	4A	654345599	0.056874047	0.463917526	99	0.072323212	0.110258891	0.080650708	16.80099641
M1315	1B	184220516	0.056965004	0.06185567	99	0.072323212	0.110230508	0.105622876	26.07399469
M925	1B	33009274	0.056965004	0.06185567	99	0.072323212	0.110230508	0.105622876	26.07399469
M8115	3B	596722094	0.057000883	0.154639175	99	0.072323212	0.110219325	0.01039413	-17.00698711
M9406	4A	0	0.057020797	0.432989691	99	0.072323212	0.110213121	0.082878802	17.62836181
M5368	2D	14379312	0.057039458	0.06185567	99	0.072323212	0.11020731	0.103539008	25.30018505
M5940	2D	620909947	0.057042731	0.278350515	99	0.072323212	0.110206291	0.071338074	13.34290482
M8484	3D	575600452	0.057138288	0.412371134	99	0.072323212	0.110176569	0.078022488	15.82505064
M966	1B	50203925	0.057144403	0.134020619	99	0.072323212	0.110174669	0.089571263	20.11349555
M12543	6A	112907129	0.057151245	0.020618557	99	0.072323212	0.110172543	0.13989338	38.79977528
M7110	3B	22915822	0.057151245	0.020618557	99	0.072323212	0.110172543	0.13989338	38.79977528
M11475	5B	549587494	0.057151245	0.020618557	99	0.072323212	0.110172543	0.06908207	-38.79977528
M8074	3B	790541416	0.057252283	0.360824742	99	0.072323212	0.110141182	0.003428388	-14.4203748
M2045	1D	50910641	0.057277014	0.175257732	99	0.072323212	0.110133515	0.037933341	-27.23321411
M6308	3A	50910283	0.057316584	0.329896907	99	0.072323212	0.110121254	0.008343171	-16.24539764
M8517	3D	612711286	0.057342453	0.24742268	99	0.072323212	0.110113244	0.010769526	-17.14638396
M3367	2A	753091715	0.057345094	0.360824742	99	0.072323212	0.110112427	0.068307951	-38.51231928
M6704	3A	711688085	0.057347421	0.092783505	99	0.072323212	0.110111706	0.018594489	-20.05205344
M4654	2B	602009444	0.057349696	0.381443299	99	0.072323212	0.110111002	0.002842512	-14.20281941
M9289	4A	11455079	0.057530746	0.175257732	99	0.072323212	0.110055058	0.077376228	15.5850726
M9173	4A	708514620	0.057661581	0.020618557	99	0.072323212	0.110014749	0.153836166	43.97719646
M6628	3A	732314439	0.057661581	0.020618557	99	0.072323212	0.110014749	0.083024856	-43.97719646
M4423	2B	544170551	0.057720444	0.402061856	99	0.072323212	0.109996646	0.002246656	-13.98155813
M642	1A	580452752	0.057754292	0.329896907	99	0.072323212	0.109986245	0.069215668	12.55478479
M9763	4D	370674103	0.057780553	0.360824742	99	0.072323212	0.10997818	0.078332058	15.94000419
M4291	2B	143000173	0.057845406	0.443298969	99	0.072323212	0.10995828	0.013652011	-18.21674688
M11997	5D	553338175	0.057945785	0.484536082	99	0.072323212	0.109927527	0.008276085	-16.22048636
M5718	2D	0	0.058030414	0.432989691	99	0.072323212	0.109901643	0.076682258	15.3273785
M4628	2B	689711741	0.058085557	0.412371134	99	0.072323212	0.1098848	0.001453074	-13.6868749
M3464	2B	13418676	0.058240255	0.268041237	99	0.072323212	0.10983764	0.077143368	15.49860387
M11008	5B	488902270	0.058242755	0.144329897	99	0.072323212	0.109836879	0.023363127	-21.82280798
M12387	6A	29804894	0.058248582	0.298969072	99	0.072323212	0.109835105	0.015870813	-19.04066187
M357	1A	497201654	0.058413074	0.113402062	99	0.072323212	0.109785116	0.015433355	-18.87821897
M5542	2D	530255014	0.058509183	0.309278351	99	0.072323212	0.109755979	0.004446388	-14.79839194
M3358	2A	766039959	0.058530993	0.432989691	99	0.072323212	0.109749374	9.82E-05	-13.11082616
M11993	5D	548685020	0.058541663	0.463917526	99	0.072323212	0.109746143	0.069697581	12.73373503
M8644	4A	413875836	0.058548797	0.371134021	99	0.072323212	0.109743984	0.013754483	-18.25479784
M13297	6B	0	0.058584808	0.443298969	99	0.072323212	0.109733088	0.088997914	19.90059203
M10860	5B	398970101	0.058593704	0.06185567	99	0.072323212	0.109730397	0.096898945	22.83450833
M10634	5B	28812335	0.058607573	0.412371134	99	0.072323212	0.109726203	0.01101081	-17.23598064
M15126	7A	734524063	0.058650271	0.082474227	99	0.072323212	0.109713298	0.02299975	-21.68787374
M7452	3B	221458347	0.058714584	0.453608247	99	0.072323212	0.10969388	0.017796091	-19.75558196
M10988	5B	476806091	0.058724601	0.371134021	99	0.072323212	0.109690858	0.097337808	22.99747281
M6742	3A	716528015	0.058746047	0.494845361	99	0.072323212	0.109684389	0.009840829	-16.80152789
M9102	4A	695118747	0.058837331	0.030927835	99	0.072323212	0.109656883	0.052028848	-32.46734544
M7471	3B	127778429	0.059145513	0.24742268	99	0.072323212	0.109564359	0.082488431	17.48340411
M10875	5B	524047080	0.059251556	0.474226804	99	0.072323212	0.109532642	0.087711489	19.42289969
M744	1B	2431679	0.059267498	0.443298969	99	0.072323212	0.10952788	0.000321455	-13.2666668
M5165	2B	518823530	0.059290649	0.350515464	99	0.072323212	0.109520966	0.070576309	13.06003602
M4613	2B	91473909	0.059293286	0.164948454	99	0.072323212	0.109520178	0.007079686	-15.77622328
M8740	4A	521603853	0.059318873	0.453608247	99	0.072323212	0.10951254	0.015106417	-18.75681616
M6815	3A	547714720	0.059362553	0.020618557	99	0.072323212	0.10949951	0.065331677	-37.40712938
M6828	3A	742590041	0.059362553	0.020618557	99	0.072323212	0.10949951	0.065331677	-37.40712938
M2080	1D	40222148	0.059452328	0.360824742	99	0.072323212	0.109472762	0.009478452	-16.66696523
M9267	4A	729819205	0.059527801	0.216494845	99	0.072323212	0.109450308	0.074866587	14.65315928
M211	1A	293607657	0.059725954	0.402061856	99	0.072323212	0.109391503	0.081420829	17.08696782
M3540	2B	28720546	0.059783529	0.226804124	99	0.072323212	0.109374457	0.008747797	-16.39564875
M7193	3B	35451949	0.059805814	0.350515464	99	0.072323212	0.109367863	0.002787907	-12.11205706
M4887	2B	562440272	0.059857019	0.432989691	99	0.072323212	0.109352724	0.073620702	14.19052066
M701	1B	3572450	0.059899074	0.371134021	99	0.072323212	0.1093403	0.004167131	-14.69469468
M3552	2B	30630417	0.059917725	0.298969072	99	0.072323212	0.109334793	0.077275481	15.54766198
M14254	7A	0	0.06006769	0.103092784	99	0.072323212	0.109290582	0.028950716	-23.89766597
M4568	2B	545270114	0.060083875	0.226804124	99	0.072323212	0.109285818	0.070887815	13.17570868
M14417	7A	33369174	0.060117792	0.474226804	99	0.072323212	0.109275838	0.011053617	-17.25187645
M162	1A	24574724	0.060118245	0.412371134	99	0.072323212	0.109275705	0.003781385	-14.55145447
M11358	5B	181032589	0.060263013	0.278350515	99	0.072323212	0.109233179	0.071570844	13.42934017
M10677	5B	37979682	0.060277499	0.360824742	99	0.072323212	0.109228929	0.074033508	14.34380937
M11315	5B	433216045	0.060283706	0.010309278	99	0.072323212	0.109227109	0.180115363	53.73553827
M8751	4A	0	0.060283706	0.010309278	99	0.072323212	0.109227109	0.180115363	53.73553827
M11299	5B	261777240	0.060283706	0.010309278	99	0.072323212	0.109227109	0.109304053	-53.73553827
M7166	3B	41426550	0.060283706	0.010309278	99	0.072323212	0.109227109	0.109304053	-53.73553827
M8495	3D	596995100	0.060354174	0.494845361	99	0.072323212	0.109206456	0.075250204	14.79560908
M1511	1B	415423029	0.06036096	0.463917526	99	0.072323212	0.109204468	0.067166423	11.79383164
M6430	3A	517095336	0.060374051	0.103092784	99	0.072323212	0.109200635	0.034633479	-26.00786509
M6166	3A	412102912	0.060402191	0.381443299	99	0.072323212	0.109192398	0.073994789	14.32943172
M6683	3A	294935009	0.06065014	0.381443299	99	0.072323212	0.109119998	0.08276122	17.58469969
M6691	3A	711365579	0.060701799	0.319587629	99	0.072323212	0.109104954	0.0067918	-15.66932173
M13587	6B	676372364	0.060761358	0.463917526	99	0.072323212	0.109087627	0.069883305	12.80270071
M6127	3A	19895266	0.060829528	0.288659794	99	0.072323212	0.109067817	0.001409596	-12.62386995
M9649	4B	663662517	0.061045594	0.082474227	99	0.072323212	0.109005187	0.025658135	-22.67502082
M11276	5B	529230350	0.061051918	0.298969072	99	0.072323212	0.109003358	0.005033196	-15.01629339
M8843	4A	180859936	0.06110349	0.360824742	99	0.072323212	0.108988446	0.069073404	12.50195722
M1574	1B	429600976	0.061110974	0.350515464	99	0.072323212	0.108986283	0.007086691	-15.77882456
M9526	4B	196094104	0.061216719	0.340206186	99	0.072323212	0.108955755	0.115324486	29.67652576
M13628	6B	691035513	0.061236116	0.092783505	99	0.072323212	0.108950161	0.020649273	-20.81506346
M5591	2D	739690772	0.061237662	0.391752577	99	0.072323212	0.108949715	0.079852724	16.50467801
M1716	1B	630932576	0.061530419	0.020618557	99	0.072323212	0.108865524	0.068622671	-38.62918521
M3652	2B	53458522	0.061566471	0.309278351	99	0.072323212	0.108855186	0.002836244	-12.09410824
M13137	6B	77458408	0.061746482	0.298969072	99	0.072323212	0.108803666	0.016061616	-19.11151342
M12252	6A	16598099	0.061825065	0.154639175	99	0.072323212	0.108781227	0.082338946	17.42789518
M14061	6D	450169167	0.061827247	0.12371134	99	0.072323212	0.108780604	0.008813557	-16.42006743
M8503	3D	603669558	0.061876287	0.402061856	99	0.072323212	0.108766617	0.094798496	22.05454146
M13074	6B	39341325	0.061976078	0.154639175	99	0.072323212	0.108738191	0.080406448	16.71029424
M3173	2A	0	0.06197924	0.422680412	99	0.072323212	0.108737291	0.073396007	14.1070841
M14378	7A	701571182	0.061982694	0.24742268	99	0.072323212	0.108736308	0.001691465	-13.7753975
M12000	5D	555036729	0.061987103	0.154639175	99	0.072323212	0.108735053	0.008876819	-16.44355887
M829	1B	441543004	0.062105159	0.412371134	99	0.072323212	0.108701495	0.08882918	19.83793566
M2910	2A	677497860	0.062207262	0.175257732	99	0.072323212	0.108672528	0.08085616	16.87728758
M5795	2D	744685545	0.062327291	0.350515464	99	0.072323212	0.10863854	0.067459602	-38.19729898
M7116	3B	20952119	0.062413299	0.134020619	99	0.072323212	0.108614229	0.014277869	-18.44914855
M5838	2D	596252327	0.062420058	0.371134021	99	0.072323212	0.10861232	0.000820469	-13.4519674
M6068	3A	12479120	0.062575262	0.051546392	99	0.072323212	0.108568548	0.106619648	26.44412934
M9213	4A	14301407	0.062575452	0.288659794	99	0.072323212	0.108568494	0.00643896	-15.53830056
M2647	2A	100985631	0.062751382	0.257731959	99	0.072323212	0.108519019	0.007259026	-15.84281834
M3680	2B	38442340	0.062762144	0.082474227	99	0.072323212	0.108515997	0.100496691	24.17047123
M15305	7B	113572118	0.062826508	0.319587629	99	0.072323212	0.108497937	0.07030559	12.95950915
M7872	3B	559218778	0.062871508	0.443298969	99	0.072323212	0.108485323	0.008461871	-16.28947472
M7705	3B	683106209	0.06287177	0.041237113	99	0.072323212	0.108485249	0.116907508	30.26435469
M11792	5B	656472011	0.062875579	0.237113402	99	0.072323212	0.108484182	0.003692856	-14.51858062
M3699	2B	568415591	0.062887931	0.237113402	99	0.072323212	0.108480721	0.071753347	13.49710948
M11312	5B	53062019	0.062895575	0.164948454	99	0.072323212	0.10847858	0.007219252	-15.82804875
M4586	2B	710353117	0.062947395	0.463917526	99	0.072323212	0.108464072	0.012074542	-17.63098
M2796	2A	185345167	0.063011021	0.144329897	99	0.072323212	0.108446276	0.041754347	-28.65208067
M319	1A	471700683	0.063068044	0.298969072	99	0.072323212	0.108430344	0.082677095	17.55346114
M14906	7A	693636591	0.063095953	0.12371134	99	0.072323212	0.108422552	0.087594806	19.37957114
M11437	5B	422432511	0.063127019	0.309278351	99	0.072323212	0.108413882	0.000180672	-13.21438953
M6695	3A	711289967	0.063173082	0.288659794	99	0.072323212	0.108401036	0.077721396	15.71324491
M15458	7B	0	0.063176174	0.268041237	99	0.072323212	0.108400175	0.001832297	-13.82769284
M10278	5A	551446643	0.063224919	0.412371134	99	0.072323212	0.108386592	0.097356329	23.00435033
M3631	2B	286756395	0.063239125	0.298969072	99	0.072323212	0.108382636	0.099732693	23.88677345
M6206	3A	567030074	0.063304567	0.010309278	99	0.072323212	0.108364424	0.17305948	51.11545353
M9369	4A	8464531	0.063304567	0.010309278	99	0.072323212	0.108364424	0.17305948	51.11545353
M6752	3A	0	0.063304567	0.010309278	99	0.072323212	0.108364424	0.102248169	-51.11545353
M8725	4A	535036625	0.063304567	0.010309278	99	0.072323212	0.108364424	0.102248169	-51.11545353
M5793	2D	575366522	0.063423692	0.309278351	99	0.072323212	0.108331325	0.003638623	-14.49844215
M8064	3B	748377632	0.063437254	0.103092784	99	0.072323212	0.108327561	0.018724865	-20.10046635
M4589	2B	0	0.063498991	0.24742268	99	0.072323212	0.108310438	0.075333421	14.82651028
M215	1A	288094235	0.063515233	0.381443299	99	0.072323212	0.108305936	0.079931175	16.53380976
M2969	2A	703879878	0.063566282	0.051546392	99	0.072323212	0.108291795	0.03112011	-24.70323403
M6618	3A	688594260	0.063580554	0.24742268	99	0.072323212	0.108287843	0.080622613	16.79056371
M2009	1D	17621853	0.063599779	0.381443299	99	0.072323212	0.108282522	0.087576457	19.37275764
M265	1A	355850745	0.063674044	0.030927835	99	0.072323212	0.108261983	0.045013086	-29.86215909
M9413	4A	743748313	0.063739432	0.360824742	99	0.072323212	0.108243921	0.079570748	16.39997099
M913	1B	309086631	0.063746618	0.463917526	99	0.072323212	0.108241938	0.008925352	-16.46158069
M5479	2D	68916330	0.063757082	0.329896907	99	0.072323212	0.108239049	0.065867833	-37.60622183
M5599	2D	665523602	0.063758973	0.402061856	99	0.072323212	0.108238527	0.082279861	17.4059552
M12500	6A	127787324	0.063762926	0.329896907	99	0.072323212	0.108237436	0.044321151	-29.60522073
M14931	7A	699147857	0.063809568	0.443298969	99	0.072323212	0.10822457	0.027241731	-23.26306294
M7169	3B	37403983	0.0638288	0.329896907	99	0.072323212	0.108219267	0.131067848	35.52256085
M9880	5A	0	0.063840321	0.092783505	99	0.072323212	0.108216092	0.087835624	19.46899518
M6767	3A	489299704	0.063860489	0.072164948	99	0.072323212	0.108210534	0.091487379	20.82501343
M606	1A	660283082	0.063903863	0.412371134	99	0.072323212	0.108198589	0.075664574	14.94947838
M13228	6B	156219080	0.06391781	0.154639175	99	0.072323212	0.108194749	0.078940569	16.16596462
M8828	4A	138660384	0.06408916	0.12371134	99	0.072323212	0.108147655	0.013750975	-18.25349535
M4629	2B	427616803	0.064099622	0.453608247	99	0.072323212	0.108144784	0.011583847	-17.44876843
M14097	6D	461702450	0.064162647	0.020618557	99	0.072323212	0.108127499	0.139268217	38.56763135
M14162	7A	150861541	0.064162647	0.020618557	99	0.072323212	0.108127499	0.139268217	38.56763135
M11914	5D	341609030	0.064484042	0.391752577	99	0.072323212	0.108039642	0.097999312	23.24311101
M4350	2B	522833347	0.064562028	0.309278351	99	0.072323212	0.108018396	0.070441835	13.01010156
M8093	3B	803512428	0.064562906	0.443298969	99	0.072323212	0.108018157	0.014634765	-18.58167611
M2378	2A	0	0.064584624	0.350515464	99	0.072323212	0.108012245	0.003645247	-14.5009018
M11466	5B	333414790	0.06459098	0.237113402	99	0.072323212	0.108010515	0.07817988	15.88349534
M3674	2B	66667038	0.064641231	0.381443299	99	0.072323212	0.107996846	0.002087837	-12.37201654
M5729	2D	716052552	0.064715722	0.422680412	99	0.072323212	0.107976604	0.068167159	12.16543839
M11427	5B	13284590	0.064775477	0.216494845	99	0.072323212	0.107960386	0.003691693	-14.51814875
M6783	3A	726107371	0.064835267	0.072164948	99	0.072323212	0.107944173	0.091137945	20.69525685
M848	1B	17621853	0.064886265	0.298969072	99	0.072323212	0.107930358	0.005941614	-15.35361938
M14487	7A	50010206	0.064971519	0.298969072	99	0.072323212	0.107907288	0.085478989	18.59389775
M8259	3D	0	0.065006816	0.360824742	99	0.072323212	0.107897747	0.006093789	-15.41012683
M464	1A	536653752	0.065086009	0.206185567	99	0.072323212	0.10787636	0.079412645	16.34126221
M7540	3B	513663423	0.065211299	0.288659794	99	0.072323212	0.107842581	0.06936411	12.60990621
M9673	4B	666331476	0.065250565	0.391752577	99	0.072323212	0.107832009	0.00304912	-12.01506013
M7133	3B	23945411	0.065282976	0.360824742	99	0.072323212	0.107823288	0.049668138	-31.59073536
M13884	6D	6343670	0.065520539	0.309278351	99	0.072323212	0.107759509	0.074761514	14.61414224
M14226	7A	8530345	0.065543017	0.391752577	99	0.072323212	0.107753487	0.101803335	24.65567173
M14231	7A	7564822	0.065543017	0.391752577	99	0.072323212	0.107753487	0.101803335	24.65567173
M14228	7A	12838214	0.065543017	0.391752577	99	0.072323212	0.107753487	0.030992024	-24.65567173
M14205	7A	104669566	0.065552423	0.072164948	99	0.072323212	0.107750968	0.031795905	-24.95417933
M4962	2B	753749466	0.065594757	0.164948454	99	0.072323212	0.107739635	0.007538357	-15.94654313
M8541	4A	0	0.065629436	0.402061856	99	0.072323212	0.107730357	0.004058997	-11.64005917
M10130	5A	462163976	0.065690578	0.443298969	99	0.072323212	0.107714013	0.003906895	-11.69653966
M386	1A	197865491	0.065747755	0.402061856	99	0.072323212	0.107698743	0.001171701	-12.71220836
M6714	3A	669396058	0.065778729	0.371134021	99	0.072323212	0.107690477	0.009720945	-16.75701101
M7185	3B	825539318	0.065782458	0.309278351	99	0.072323212	0.107689482	0.071489463	13.3991206
M5564	2D	586893685	0.066000294	0.360824742	99	0.072323212	0.107631471	0.00579557	-15.29938826
M15200	7B	103678623	0.066026274	0.072164948	99	0.072323212	0.107624566	0.027174131	-23.23796067
M9285	4A	725941577	0.066052527	0.175257732	99	0.072323212	0.107617592	0.002507105	-14.07827162
M13160	6B	119525391	0.066052537	0.494845361	99	0.072323212	0.107617589	0.067885018	12.06067006
M2667	2A	13835059	0.066056572	0.432989691	99	0.072323212	0.107616518	0.014088445	-18.3788094
M8730	4A	532076077	0.066121905	0.340206186	99	0.072323212	0.107599176	0.006916921	-15.71578324
M8735	4A	534555874	0.066121905	0.340206186	99	0.072323212	0.107599176	0.006916921	-15.71578324
M7243	3B	0	0.066187171	0.484536082	99	0.072323212	0.10758187	0.065664846	11.23624599
M4904	2B	746935334	0.066234188	0.319587629	99	0.072323212	0.107569415	0.100752141	24.26532819
M1505	1B	57318239	0.066304925	0.443298969	99	0.072323212	0.107550694	0.014600194	-18.56883883
M13120	6B	26195828	0.066321961	0.391752577	99	0.072323212	0.107546188	0.073888233	14.289864
M7096	3B	565309643	0.066329756	0.309278351	99	0.072323212	0.107544128	0.001260738	-12.67914606
M12034	5D	561671414	0.066565603	0.443298969	99	0.072323212	0.107481891	0.071855122	13.53490201
M2219	1D	438024561	0.066590691	0.206185567	99	0.072323212	0.107475285	0.082095081	17.33734026
M1526	1B	588259435	0.066686077	0.443298969	99	0.072323212	0.107450192	0.071192213	13.28874176
M11172	5B	425076594	0.066697555	0.391752577	99	0.072323212	0.107447176	0.00599041	-15.37173888
M14514	7A	55205086	0.066816302	0.402061856	99	0.072323212	0.107415998	0.074571664	14.54364448
M10154	5A	635583587	0.066863972	0.237113402	99	0.072323212	0.107403499	0.002782171	-14.18041285
M14454	7A	38241544	0.06687566	0.309278351	99	0.072323212	0.107400436	0.009501218	-16.67541879
M5248	2B	477446953	0.066919664	0.309278351	99	0.072323212	0.107388908	0.005096947	-15.0399664
M13158	6B	75943589	0.067079281	0.206185567	99	0.072323212	0.107347165	0.007665292	-15.99367835
M9800	4D	482953875	0.067113773	0.18556701	99	0.072323212	0.107338159	0.075428186	14.86169964
M2692	2A	157115362	0.067242693	0.463917526	99	0.072323212	0.107304541	0.044556014	-29.69243335
M1829	1B	475449961	0.06725972	0.360824742	99	0.072323212	0.107300106	0.003660339	-11.788094
M8537	4A	28592618	0.067293026	0.402061856	99	0.072323212	0.107291435	0.000952824	-12.79348475
M3802	2B	456534362	0.0673406	0.206185567	99	0.072323212	0.107279057	0.006369922	-15.51266427
M2272	1D	476709871	0.067358238	0.092783505	99	0.072323212	0.10727447	0.011814928	-17.53457661
M5204	2B	124972475	0.067488235	0.113402062	99	0.072323212	0.107240705	0.082504069	17.48921086
M2386	2A	0	0.06755937	0.484536082	99	0.072323212	0.107222259	0.037815829	-27.18957792
M2725	2A	0	0.06755937	0.484536082	99	0.072323212	0.107222259	0.037815829	-27.18957792
M5822	2D	606705458	0.067639705	0.391752577	99	0.072323212	0.107201452	0.004501154	-14.81872854
M8701	4A	141909718	0.067837152	0.474226804	99	0.072323212	0.107150427	0.076794815	15.36917463
M1756	1B	632670376	0.067864099	0.278350515	99	0.072323212	0.107143476	0.0709813	13.21042263
M1238	1B	442968471	0.067910838	0.164948454	99	0.072323212	0.107131426	0.010394686	-17.00719331
M7578	3B	525614613	0.067933217	0.113402062	99	0.072323212	0.10712566	0.080335264	16.68386126
M331	1A	474702375	0.067947904	0.319587629	99	0.072323212	0.107121877	0.167042561	48.88117109
M5405	2D	24778175	0.068017139	0.402061856	99	0.072323212	0.107104055	0.006769569	-15.66106647
M14423	7A	35387463	0.068090445	0.154639175	99	0.072323212	0.107085206	0.096812944	22.80257321
M1057	1B	48462498	0.068188272	0.432989691	99	0.072323212	0.107060087	0.076524104	15.26865071
M7298	3B	67787098	0.068224336	0.432989691	99	0.072323212	0.107050837	0.089835217	20.21151045
M9021	4A	656904182	0.06824402	0.402061856	99	0.072323212	0.10704579	0.074269714	14.43152033
M3874	2B	116192482	0.068282164	0.484536082	99	0.072323212	0.107036015	0.071453876	13.38590594
M3499	2B	24690037	0.068292831	0.278350515	99	0.072323212	0.107033283	0.008577829	-16.33253385
M7097	3B	22443954	0.068329964	0.298969072	99	0.072323212	0.107023774	0.101988771	24.72453032
M2293	1D	586317908	0.068408889	0.494845361	99	0.072323212	0.107003583	0.003861486	-11.71340159
M3520	2B	0	0.06841601	0.216494845	99	0.072323212	0.107001763	0.069736137	12.74805233
M3096	2A	610377425	0.068430803	0.360824742	99	0.072323212	0.106997982	0.003626957	-11.80049001
M7646	3B	590292239	0.068669455	0.226804124	99	0.072323212	0.106937102	0.012251293	-17.69661349
M12900	6A	613935101	0.068682992	0.422680412	99	0.072323212	0.106933656	0.002169194	-13.95279412
M2638	2A	102903997	0.06869601	0.206185567	99	0.072323212	0.106930342	0.000369046	-13.01026101
M8797	4A	601140082	0.068782619	0.164948454	99	0.072323212	0.106908315	0.00719941	-15.82068081
M12621	6A	0	0.069017145	0.237113402	99	0.072323212	0.106848819	0.011718217	-17.49866475
M5873	2D	601406100	0.069023699	0.144329897	99	0.072323212	0.106847159	0.081672745	17.18051262
M8130	3B	803849255	0.069068141	0.06185567	99	0.072323212	0.106835911	0.024343774	-22.18695477
M206	1A	65375712	0.06911797	0.391752577	99	0.072323212	0.106823308	0.077129364	15.49340365
M2471	2A	19484111	0.069202354	0.371134021	99	0.072323212	0.106801989	0.078569631	16.02822292
M2487	2A	2944702	0.069270827	0.18556701	99	0.072323212	0.10678471	0.079379128	16.32881637
M9216	4A	720887655	0.06938182	0.237113402	99	0.072323212	0.106756741	0.003799729	-14.55826607
M7419	3B	367482313	0.069475573	0.072164948	99	0.072323212	0.106733154	0.018433411	-19.99223994
M13379	6B	573801162	0.069489829	0.422680412	99	0.072323212	0.106729571	0.017305933	-19.57356981
M4612	2B	0	0.069594116	0.340206186	99	0.072323212	0.10670338	0.066411939	11.51366677
M5040	2B	767024523	0.069609207	0.237113402	99	0.072323212	0.106699594	0.004295078	-14.7422058
M188	1A	46644205	0.069663666	0.309278351	99	0.072323212	0.106685937	0.003384481	-14.40407064
M4846	2B	0	0.06972933	0.113402062	99	0.072323212	0.106669486	0.014814742	-18.64850736
M15304	7B	130505517	0.069746971	0.391752577	99	0.072323212	0.106665069	0.081557743	17.13780872
M9316	4A	336207656	0.069749238	0.072164948	99	0.072323212	0.106664502	0.028359874	-23.6782666
M3253	2A	759751315	0.069950314	0.391752577	99	0.072323212	0.106614246	0.008921006	-16.45996688
M4489	2B	643092677	0.069968962	0.474226804	99	0.072323212	0.106609593	0.086163449	18.84806064
M9260	4A	724783161	0.069999427	0.422680412	99	0.072323212	0.106601995	0.070321866	12.96555285
M4264	2B	328673302	0.070002483	0.319587629	99	0.072323212	0.106601233	0.068423751	12.26071956
M11740	5B	676094493	0.070128447	0.371134021	99	0.072323212	0.106569856	0.113676138	29.06443933
M6202	3A	23155739	0.070197437	0.237113402	99	0.072323212	0.106552697	0.009647888	-16.72988238
M11083	5B	0	0.070330308	0.051546392	99	0.072323212	0.106519701	0.105523069	26.03693295
M6413	3A	509564298	0.070371595	0.391752577	99	0.072323212	0.106509462	0.084481955	18.22366584
M10924	5B	769502023	0.070378159	0.12371134	99	0.072323212	0.106507835	0.080001741	16.5600132
M3719	2B	73990357	0.070425792	0.412371134	99	0.072323212	0.106496031	0.002441077	-14.05375323
M3627	2B	419250140	0.070491763	0.402061856	99	0.072323212	0.106479698	0.101023797	24.36620326
M9629	4B	653614624	0.07058868	0.268041237	99	0.072323212	0.106455733	0.07350851	14.14885988
M3361	2A	0	0.070718541	0.412371134	99	0.072323212	0.106423679	0.09011484	20.31534376
M3792	2B	77236275	0.070750538	0.092783505	99	0.072323212	0.10641579	0.01620129	-19.16337896
M4142	2B	108313448	0.070769795	0.18556701	99	0.072323212	0.106411045	0.072317492	13.70659525
M693	1A	376935623	0.071038349	0.319587629	99	0.072323212	0.106345011	0.008263539	-16.21582763
M6459	3A	564759853	0.071084947	0.484536082	99	0.072323212	0.10633358	0.076425292	15.23195847
M3094	2A	0	0.071096527	0.175257732	99	0.072323212	0.106330741	0.009508221	-16.67801955
M15559	7B	215030611	0.071105924	0.06185567	99	0.072323212	0.106328437	0.102889626	25.05904775
M8012	3B	533130365	0.071146	0.360824742	99	0.072323212	0.106318617	0.027642108	-23.41173602
M7211	3B	0	0.071206899	0.371134021	99	0.072323212	0.106303705	0.048012931	-30.97610161
M15218	7B	0	0.071222484	0.371134021	99	0.072323212	0.106299891	0.003092017	-14.29546895
M6757	3A	338240084	0.071269243	0.381443299	99	0.072323212	0.106288454	0.089201226	19.97608864
M10330	5A	565404888	0.071362082	0.381443299	99	0.072323212	0.106265769	0.101918102	24.69828863
M5834	2D	594543436	0.07153897	0.402061856	99	0.072323212	0.106222637	0.005141105	-15.05636371
M3730	2B	78873105	0.071545692	0.494845361	99	0.072323212	0.106221	0.080042094	16.57499751
M4968	2B	765220771	0.071551249	0.350515464	99	0.072323212	0.106219647	0.07338798	14.10410342
M4521	2B	669052155	0.071678935	0.298969072	99	0.072323212	0.10618859	0.010061228	-16.88336943
M13589	6B	676372364	0.071684652	0.432989691	99	0.072323212	0.106187201	0.004613246	-11.43424812
M3756	2B	392096989	0.071791584	0.453608247	99	0.072323212	0.106161241	0.007819016	-16.05076142
M13260	6B	215650786	0.071813683	0.113402062	99	0.072323212	0.106155881	0.011415474	-17.38624614
M9571	4B	8256802	0.071864512	0.484536082	99	0.072323212	0.10614356	0.016036532	-19.10219895
M5688	2D	0	0.071891273	0.422680412	99	0.072323212	0.106137077	0.004168685	-14.69527181
M12829	6A	0	0.071901891	0.443298969	99	0.072323212	0.106134505	0.068646467	12.34342127
M6414	3A	509564298	0.071970598	0.226804124	99	0.072323212	0.106117875	0.072079823	13.61834082
M14497	7A	56324324	0.072108869	0.051546392	99	0.072323212	0.106084459	0.101921131	24.6994134
M4756	2B	727221588	0.072137398	0.195876289	99	0.072323212	0.106077574	0.076921486	15.41621179
M10856	5B	536909476	0.072166176	0.257731959	99	0.072323212	0.106070631	0.071971134	13.5779811
M5528	2D	588540369	0.072306436	0.340206186	99	0.072323212	0.106036835	0.006937665	-15.72348635
M13563	6B	663760681	0.072315045	0.041237113	99	0.072323212	0.106034763	0.0392611	-27.72625529
M10488	5A	481112347	0.072425257	0.288659794	99	0.072323212	0.106008261	0.070383307	12.988368
M761	1B	25945971	0.072441455	0.443298969	99	0.072323212	0.10600437	0.001356301	-12.64366013
M8044	3B	228195974	0.072526666	0.340206186	99	0.072323212	0.105983915	0.164871618	48.07502763
M13203	6B	65496487	0.072632513	0.371134021	99	0.072323212	0.105958543	0.040052972	-28.02030373
M10674	5B	353920901	0.07267835	0.319587629	99	0.072323212	0.105947568	0.073123439	14.00587018
M6674	3A	707348902	0.072698519	0.350515464	99	0.072323212	0.105942741	0.076152465	15.13064884
M13327	6B	439380404	0.072818645	0.113402062	99	0.072323212	0.105914023	0.011566018	-17.44214786
M2321	2A	0	0.073017505	0.474226804	99	0.072323212	0.105866597	0.040889501	-28.33093466
M14106	6D	608662012	0.073018865	0.278350515	99	0.072323212	0.105866273	0.081900778	17.26518903
M5179	2B	763798678	0.07303441	0.350515464	99	0.072323212	0.105862571	0.073428515	14.11915522
M13198	6B	0	0.073053225	0.082474227	99	0.072323212	0.105858093	0.09101049	20.64792856
M3593	2B	506395762	0.073054066	0.432989691	99	0.072323212	0.105857893	0.005340995	-11.16401053
M6827	3A	742590041	0.07315634	0.402061856	99	0.072323212	0.105833569	0.019403012	-20.35228516
M3891	2B	110980776	0.073159802	0.494845361	99	0.072323212	0.105832746	0.080795647	16.85481676
M9759	4D	300724319	0.073166663	0.24742268	99	0.072323212	0.105831116	0.080792448	16.85362901
M7404	3B	561487846	0.073169114	0.371134021	99	0.072323212	0.105830534	0.106871924	26.53780783
M147	1A	25807423	0.073237827	0.484536082	99	0.072323212	0.105814216	0.006300902	-15.48703493
M6694	3A	712196780	0.073351794	0.474226804	99	0.072323212	0.105787188	0.003351727	-11.90269222
M15359	7B	270952860	0.073360313	0.443298969	99	0.072323212	0.10578517	0.081961423	17.28770828
M2457	2A	5928453	0.073458835	0.412371134	99	0.072323212	0.105761844	0.080044092	16.57573943
M923	1B	385657223	0.073467806	0.381443299	99	0.072323212	0.105759722	0.104057237	25.49262086
M12397	6A	610402426	0.073503383	0.298969072	99	0.072323212	0.105751309	0.076263396	15.17184101
M4260	2B	514679735	0.073782923	0.154639175	99	0.072323212	0.105685356	0.012189437	-17.67364409
M9399	4A	5381823	0.073785796	0.391752577	99	0.072323212	0.10568468	0.000294875	-13.25679708
M10197	5A	0	0.073874639	0.298969072	99	0.072323212	0.105663777	0.076372193	15.21224117
M476	1A	540664662	0.073885283	0.453608247	99	0.072323212	0.105661275	0.002473144	-12.22893919
M11143	5B	415769289	0.073954521	0.319587629	99	0.072323212	0.105645006	0.074967414	14.69059986
M2440	2A	21812330	0.074055531	0.164948454	99	0.072323212	0.105621302	0.108111551	26.99812242
M2384	2A	19836679	0.074079892	0.216494845	99	0.072323212	0.10561559	0.089270314	20.00174319
M14243	7A	600721014	0.074118313	0.113402062	99	0.072323212	0.105606586	0.016525189	-19.28365351
M13139	6B	78208497	0.074238435	0.391752577	99	0.072323212	0.105578469	0.095678142	22.38118354
M9520	4B	535089105	0.074303334	0.484536082	99	0.072323212	0.105563299	0.006206706	-15.45205675
M2392	2A	24002743	0.074418233	0.381443299	99	0.072323212	0.105536476	0.07900396	16.18950382
M3581	2B	31578859	0.074423497	0.381443299	99	0.072323212	0.105535248	0.07552366	14.89715247
M15460	7B	583544299	0.074503117	0.278350515	99	0.072323212	0.105516689	0.003604393	-14.4857311
M3263	2A	773709829	0.074608681	0.474226804	99	0.072323212	0.105492116	0.07409808	14.36778699
M5586	2D	459879715	0.074714744	0.484536082	99	0.072323212	0.105467465	0.069357261	12.60736296
M619	1A	579302653	0.07480788	0.154639175	99	0.072323212	0.10544585	0.006975593	-15.73757002
M8090	3B	795540049	0.074947314	0.443298969	99	0.072323212	0.105413545	0.082292748	17.41074036
M14432	7A	0	0.074993357	0.494845361	99	0.072323212	0.105402891	0.019428946	-20.36191541
M15145	7A	113229613	0.07500368	0.092783505	99	0.072323212	0.105400504	0.084395201	18.19145118
M14276	7A	13189977	0.075046796	0.443298969	99	0.072323212	0.105390536	0.081677597	17.18231445
M4740	2B	728198487	0.075063967	0.12371134	99	0.072323212	0.105386568	0.084644516	18.28403025
M11184	5B	436258122	0.075079776	0.484536082	99	0.072323212	0.105382915	0.010005438	-16.86265254
M3819	2B	100325164	0.075225837	0.432989691	99	0.072323212	0.10534921	0.083173179	17.73767368
M5482	2D	68916330	0.075305412	0.391752577	99	0.072323212	0.105330878	0.088589526	19.74894388
M7336	3B	65705367	0.075352904	0.113402062	99	0.072323212	0.105319946	0.088722122	19.79818125
M13625	6B	687021610	0.075459388	0.381443299	99	0.072323212	0.105295464	0.001198643	-12.70220402
M164	1A	0	0.075501539	0.443298969	99	0.072323212	0.105285784	0.067497966	11.91694472
M9404	4A	0	0.07563709	0.350515464	99	0.072323212	0.105254692	0.066656072	11.60432126
M7296	3B	67787098	0.075669472	0.412371134	99	0.072323212	0.105247274	0.076391621	15.21945523
M4759	2B	0	0.075781126	0.432989691	99	0.072323212	0.105221721	0.014232135	-18.43216631
M6853	3A	745517190	0.075791663	0.350515464	99	0.072323212	0.105219312	0.056070551	-33.96816445
M12910	6A	614247742	0.075960263	0.216494845	99	0.072323212	0.105180811	0.074844547	14.64497518
M8398	3D	226198112	0.076077955	0.288659794	99	0.072323212	0.10515399	0.001894325	-13.85072586
M13617	6B	683559271	0.076107588	0.381443299	99	0.072323212	0.105147244	0.078274766	15.91872973
M1233	1B	86102631	0.076204453	0.257731959	99	0.072323212	0.105125213	0.001194807	-12.70362833
M8556	4A	137524931	0.076223303	0.237113402	99	0.072323212	0.105120929	0.071086526	13.24949669
M5662	2D	738255354	0.076233431	0.412371134	99	0.072323212	0.105118628	0.078320674	15.93577713
M6690	3A	420562185	0.076333376	0.371134021	99	0.072323212	0.105095938	0.001552741	-13.7238846
M7704	3B	674678098	0.076373782	0.371134021	99	0.072323212	0.105086774	0.109615788	27.5566959
M3543	2B	28014544	0.076462637	0.092783505	99	0.072323212	0.105066641	0.016397578	-19.23626725
M3241	2A	648639392	0.076490651	0.340206186	99	0.072323212	0.105060298	0.001107468	-12.73606014
M12582	6A	525799703	0.076609655	0.350515464	99	0.072323212	0.105033385	0.070350165	12.97606137
M2833	2A	177899477	0.076683579	0.12371134	99	0.072323212	0.105016689	0.017018626	-19.46688321
M1678	1B	599251551	0.076692587	0.360824742	99	0.072323212	0.105014656	0.112379619	28.58299861
M72	1A	10132748	0.076696625	0.154639175	99	0.072323212	0.105013744	0.085014235	18.4213194
M5099	2B	773465887	0.07679001	0.360824742	99	0.072323212	0.104992682	0.00135093	-13.64894533
M7832	3B	733356572	0.076998848	0.463917526	99	0.072323212	0.104945683	0.015965153	-19.07569337
M9530	4B	537435483	0.077015912	0.041237113	99	0.072323212	0.104941849	0.106031812	26.22584606
M13591	6B	675246263	0.077072895	0.257731959	99	0.072323212	0.104929052	0.076704897	15.33578517
M2621	2A	95275091	0.077077094	0.278350515	99	0.072323212	0.104928109	0.006401969	-15.52456451
M13907	6D	10760515	0.077097294	0.360824742	99	0.072323212	0.104923575	0.071710224	13.48109637
M5241	2B	31519188	0.077118473	0.329896907	99	0.072323212	0.104918824	0.064540439	-37.11331647
M13119	6B	26195828	0.077170749	0.216494845	99	0.072323212	0.1049071	0.074770637	14.61752991
M14838	7A	96059619	0.077196275	0.020618557	99	0.072323212	0.104901379	0.060277576	-35.53037308
M819	1B	500146991	0.077205434	0.412371134	99	0.072323212	0.104899327	0.07168067	13.47012211
M1360	1B	30505270	0.077219148	0.144329897	99	0.072323212	0.104896254	0.082400829	17.45087453
M11444	5B	649097848	0.07739228	0.226804124	99	0.072323212	0.104857517	0.000466196	-13.32041415
M9291	4A	727128715	0.077482357	0.391752577	99	0.072323212	0.104837401	0.000924147	-12.80413345
M152	1A	31918043	0.077563466	0.319587629	99	0.072323212	0.104819309	0.071265963	13.31612757
M11468	5B	180044568	0.077810002	0.350515464	99	0.072323212	0.104764444	0.132613066	36.09635198
M7103	3B	702846789	0.077810002	0.350515464	99	0.072323212	0.104764444	0.132613066	36.09635198
M12579	6A	530215873	0.077810002	0.350515464	99	0.072323212	0.104764444	0.061801756	-36.09635198
M15521	7B	400828319	0.077883038	0.164948454	99	0.072323212	0.104748227	0.07363091	14.19431112
M2746	2A	202049821	0.077938898	0.175257732	99	0.072323212	0.104735834	0.097695544	23.13031214
M6509	3A	634947372	0.077992809	0.381443299	99	0.072323212	0.104723884	0.075421321	14.85915044
M3459	2B	14761573	0.07800256	0.453608247	99	0.072323212	0.104721723	0.063738765	10.52102793
M7775	3B	729922009	0.078030391	0.103092784	99	0.072323212	0.104715558	0.011253643	-17.32615275
M13021	6B	3926040	0.078035033	0.484536082	99	0.072323212	0.10471453	0.07476234	14.61444889
M1173	1B	116005844	0.078063955	0.226804124	99	0.072323212	0.104708127	0.078322253	15.93636312
M8547	4A	381110396	0.078088196	0.350515464	99	0.072323212	0.104702761	0.068301409	12.21528973
M655	1A	583529682	0.078109439	0.329896907	99	0.072323212	0.104698061	0.003325713	-11.91235193
M10569	5B	13171598	0.078169568	0.412371134	99	0.072323212	0.104684765	0.003299491	-14.37251106
M5737	2D	586961616	0.078213343	0.443298969	99	0.072323212	0.104675092	0.081993738	17.29970803
M11159	5B	492257250	0.078305669	0.443298969	99	0.072323212	0.10465471	0.007960939	-16.10346215
M14046	6D	625779148	0.078323131	0.463917526	99	0.072323212	0.104650858	0.081237356	17.01883812
M15127	7A	734995323	0.078342021	0.103092784	99	0.072323212	0.104646692	0.082996061	17.67190384
M12507	6A	252993747	0.078457215	0.329896907	99	0.072323212	0.104621311	0.076993714	15.44303237
M10207	5A	514092701	0.078458158	0.329896907	99	0.072323212	0.104621104	0.071184268	13.28579147
M8836	4A	709792110	0.07852627	0.494845361	99	0.072323212	0.104606116	0.083718899	17.94031774
M8388	3D	184366461	0.078628752	0.226804124	99	0.072323212	0.104583592	0.005665716	-15.25116916
M1014	1B	4821459	0.078674395	0.051546392	99	0.072323212	0.104573571	0.100366174	24.12200581
M9689	4B	667731312	0.078693174	0.051546392	99	0.072323212	0.10456945	0.100535642	24.18493492
M3645	2B	32640726	0.078708139	0.494845361	99	0.072323212	0.104566166	0.004605275	-11.43720801
M8435	3D	523552116	0.07873038	0.360824742	99	0.072323212	0.104561288	0.000422831	-12.99028886
M694	1A	376935623	0.0787515	0.350515464	99	0.072323212	0.104556656	0.067916374	12.0723137
M11439	5B	1207618	0.078780963	0.371134021	99	0.072323212	0.104550198	0.000910777	-13.48550202
M564	1A	570134003	0.078854839	0.371134021	99	0.072323212	0.104534016	0.105520842	26.03610599
M6770	3A	0	0.078855469	0.164948454	99	0.072323212	0.104533878	0.002179612	-13.95666267
M6822	3A	708059930	0.079022619	0.350515464	99	0.072323212	0.104497325	0.129886205	35.08377739
M6824	3A	731113205	0.079022619	0.350515464	99	0.072323212	0.104497325	0.129886205	35.08377739
M6858	3A	311754583	0.079022619	0.350515464	99	0.072323212	0.104497325	0.129886205	35.08377739
M6825	3A	730650978	0.079022619	0.350515464	99	0.072323212	0.104497325	0.059074894	-35.08377739
M6831	3A	320011979	0.079022619	0.350515464	99	0.072323212	0.104497325	0.059074894	-35.08377739
M6868	3A	0	0.079022619	0.350515464	99	0.072323212	0.104497325	0.059074894	-35.08377739
M2252	1D	469542770	0.079187271	0.329896907	99	0.072323212	0.104461401	0.076200976	15.14866246
M4814	2B	602108234	0.079302513	0.06185567	99	0.072323212	0.104436307	0.028310869	-23.66006945
M230	1A	297737879	0.079333307	0.494845361	99	0.072323212	0.104429608	0.005573151	-15.21679658
M1698	1B	614393199	0.079359279	0.453608247	99	0.072323212	0.10442396	0.008715467	-16.38364337
M10917	5B	455741036	0.079426491	0.278350515	99	0.072323212	0.104409354	0.086175587	18.85256809
M5784	2D	611125588	0.07965498	0.226804124	99	0.072323212	0.104359802	0.06954554	12.67727713
M8940	4A	673929919	0.079815216	0.175257732	99	0.072323212	0.104325144	0.072183902	13.65698888
M10091	5A	473321191	0.079842839	0.391752577	99	0.072323212	0.104319177	0.067438833	11.8949866
M6795	3A	697506420	0.079906157	0.422680412	99	0.072323212	0.104305508	0.016478348	-19.26625997
M6366	3A	390075139	0.079948195	0.484536082	99	0.072323212	0.10429644	0.06607528	11.38865391
M8613	4A	475428443	0.079962804	0.226804124	99	0.072323212	0.10429329	0.079463174	16.36002529
M8961	4A	648906704	0.080095693	0.257731959	99	0.072323212	0.104264663	0.005405936	-15.15470427
M8775	4A	584388334	0.080159409	0.082474227	99	0.072323212	0.104250956	0.084963499	18.40247941
M5747	2D	593851647	0.080196493	0.494845361	99	0.072323212	0.104242983	0.08238622	17.44544975
M5027	2B	758922449	0.080219209	0.381443299	99	0.072323212	0.104238102	0.001164731	-12.71479652
M3509	2B	0	0.080238051	0.257731959	99	0.072323212	0.104234054	0.008739175	-16.39244683
M6711	3A	715352220	0.080277633	0.237113402	99	0.072323212	0.104225554	0.01234367	-17.73091619
M5892	2D	605470853	0.080317381	0.340206186	99	0.072323212	0.104217023	0.085792889	-45.00505942
M3247	2A	757987598	0.080510963	0.319587629	99	0.072323212	0.10417554	0.003202404	-11.95814056
M2812	2A	166864123	0.080566117	0.041237113	99	0.072323212	0.104163741	0.109925559	27.67172432
M629	1A	481552064	0.080650345	0.298969072	99	0.072323212	0.104145739	0.067235661	11.81954194
M3466	2B	9755482	0.080710033	0.309278351	99	0.072323212	0.104132995	0.001787443	-13.81103707
M8437	3D	523552116	0.080884632	0.422680412	99	0.072323212	0.104095775	0.002967818	-14.24934973
M10970	5B	472662963	0.08089864	0.391752577	99	0.072323212	0.104092793	0.065035826	11.00267024
M13162	6B	81973226	0.080938415	0.453608247	99	0.072323212	0.104084327	0.006166814	-10.85735648
M6803	3A	695744712	0.08095554	0.051546392	99	0.072323212	0.104080684	0.09767581	23.12298408
M5771	2D	598818872	0.080959135	0.329896907	99	0.072323212	0.104079919	0.074478329	14.50898618
M3399	2B	0	0.081053382	0.360824742	99	0.072323212	0.104059885	0.004177018	-14.69836591
M4773	2B	732350878	0.081183781	0.432989691	99	0.072323212	0.104032208	0.083802308	17.97129024
M4623	2B	398976460	0.081207453	0.134020619	99	0.072323212	0.104027189	0.009310411	-16.60456596
M6773	3A	58591208	0.081269564	0.340206186	99	0.072323212	0.104014027	0.004192013	-14.70393402
M3279	2A	766594412	0.081290328	0.278350515	99	0.072323212	0.104009629	0.000908046	-12.81011207
M4488	2B	577540966	0.081411703	0.134020619	99	0.072323212	0.103983948	0.012278917	-17.706871
M12469	6A	101318939	0.081467277	0.371134021	99	0.072323212	0.103972204	0.019569472	-20.41409735
M974	1B	0	0.081590128	0.278350515	99	0.072323212	0.103946272	0.003904867	-14.59730718
M5817	2D	606164081	0.081679182	0.463917526	99	0.072323212	0.103927502	0.010333497	-16.98447181
M9382	4A	732725652	0.081740089	0.381443299	99	0.072323212	0.103914677	0.02768336	-23.42705449
M3525	2B	26309987	0.081757216	0.195876289	99	0.072323212	0.103911072	0.073958682	14.31602404
M2847	2A	554520335	0.081801749	0.360824742	99	0.072323212	0.103901704	0.003080113	-12.00355156
M14977	7A	824552561	0.081926963	0.443298969	99	0.072323212	0.103875392	0.091310602	20.75937014
M6552	3A	647019881	0.082005477	0.082474227	99	0.072323212	0.103858917	0.017057593	-19.48135303
M8684	4A	269059397	0.082034909	0.381443299	99	0.072323212	0.103852745	0.005274616	-15.10594062
M6330	3A	457796953	0.082047131	0.422680412	99	0.072323212	0.103850183	0.100106605	24.02561936
M14198	7A	6351266	0.082187811	0.329896907	99	0.072323212	0.103820722	0.00444253	-11.49764045
M9162	4A	708083352	0.08219226	0.113402062	99	0.072323212	0.103819791	0.013588672	-18.19322684
M2750	2A	561848369	0.08239248	0.154639175	99	0.072323212	0.103777959	0.107522283	26.77930761
M2094	1D	732056365	0.08239248	0.154639175	99	0.072323212	0.103777959	0.036710972	-26.77930761
M1103	1B	262341897	0.082407674	0.298969072	99	0.072323212	0.103774789	0.032876801	-25.35555207
M8408	3D	349870568	0.082481905	0.463917526	99	0.072323212	0.103759311	0.004027177	-14.64272512
M3980	2B	218209754	0.082483515	0.360824742	99	0.072323212	0.103758976	0.073689997	14.21625223
M7322	3B	136803388	0.082532447	0.422680412	99	0.072323212	0.103748782	0.089911114	20.23969358
M2175	1D	0	0.082571567	0.298969072	99	0.072323212	0.103740636	0.076463672	15.24621029
M9303	4A	10150766	0.082580331	0.288659794	99	0.072323212	0.103738812	0.066626822	11.59346001
M6047	3A	8645157	0.082614621	0.412371134	99	0.072323212	0.103731677	0.025959284	-22.78684756
M2033	1D	21146599	0.082646082	0.402061856	99	0.072323212	0.103725134	0.073473691	14.13593042
M8294	3D	17391691	0.082658417	0.463917526	99	0.072323212	0.103722569	0.065180287	11.05631318
M3752	2B	408490253	0.082668933	0.18556701	99	0.072323212	0.103720382	0.077748794	15.7234189
M3560	2B	0	0.082718192	0.474226804	99	0.072323212	0.103710145	0.06608036	11.39054024
M8943	4A	674358804	0.082745452	0.329896907	99	0.072323212	0.103704483	0.00214925	-13.94538806
M8925	4A	0	0.082753724	0.226804124	99	0.072323212	0.103702765	0.074941784	14.68108238
M15498	7B	374288014	0.082757347	0.402061856	99	0.072323212	0.103702013	0.098912642	23.5822612
M14871	7A	682339108	0.082850965	0.494845361	99	0.072323212	0.103682586	0.010207562	-16.93770814
M6470	3A	61285842	0.082851872	0.360824742	99	0.072323212	0.103682398	0.038593203	-27.47824278
M3210	2A	778811091	0.082871906	0.206185567	99	0.072323212	0.103678244	0.004226524	-14.7167492
M2970	2A	703879878	0.082959116	0.453608247	99	0.072323212	0.103660173	0.0117629	-17.51525681
M8297	3D	18128457	0.083131187	0.195876289	99	0.072323212	0.10362458	0.006290062	-15.48300953
M5654	2D	590075755	0.083260865	0.391752577	99	0.072323212	0.103597809	0.000940316	-13.49647069
M3135	2A	756929010	0.083266055	0.360824742	99	0.072323212	0.103596738	0.096804859	22.79957091
M15409	7B	542993770	0.08334195	0.453608247	99	0.072323212	0.103581093	0.084585172	18.26199369
M5054	2B	0	0.08336187	0.474226804	99	0.072323212	0.103576989	0.02004921	-20.59223992
M5999	2D	37152237	0.083541898	0.484536082	99	0.072323212	0.103539949	0.005064969	-15.0280919
M3594	2B	506395762	0.083706128	0.422680412	99	0.072323212	0.103506235	0.064450182	10.78520083
M4118	2B	0	0.083781083	0.072164948	99	0.072323212	0.103490873	0.02714011	-23.22532749
M5098	2B	0	0.083968906	0.453608247	99	0.072323212	0.103452443	0.068182393	12.17109513
M154	1A	31918043	0.0840455	0.371134021	99	0.072323212	0.103436798	0.076556244	15.28058529
M2674	2A	0	0.084060982	0.154639175	99	0.072323212	0.103433638	0.10850907	27.14573456
M2431	2A	8804062	0.084060982	0.154639175	99	0.072323212	0.103433638	0.037697759	-27.14573456
M8482	3D	577409526	0.084079451	0.24742268	99	0.072323212	0.103429869	0.002502569	-14.07658725
M8113	3B	720851922	0.084119397	0.443298969	99	0.072323212	0.10342172	0.011284404	-17.33757535
M11931	5D	424046570	0.084256537	0.371134021	99	0.072323212	0.103393775	0.037606964	-27.11201926
M3875	2B	730608229	0.084328401	0.463917526	99	0.072323212	0.103379151	0.005021737	-15.01203849
M4580	2B	0	0.084428899	0.288659794	99	0.072323212	0.103358723	0.002897499	-12.07136204
M9856	5A	23011096	0.084629301	0.371134021	99	0.072323212	0.103318068	0.005253485	-11.19650578
M7796	3B	508925402	0.084665261	0.206185567	99	0.072323212	0.103310784	0.069587707	12.69293519
M4155	2B	107028709	0.084680453	0.381443299	99	0.072323212	0.103307708	0.097544051	23.07405759
M6924	3B	7302120	0.084680822	0.288659794	99	0.072323212	0.103307633	0.002944896	-14.24083821
M12418	6A	49110792	0.084824411	0.298969072	99	0.072323212	0.103278588	0.004466932	-14.80602065
M3572	2B	695616717	0.084841415	0.474226804	99	0.072323212	0.103275152	0.003123701	-11.98736578
M3661	2B	56189523	0.084917236	0.360824742	99	0.072323212	0.10325984	0.001665874	-13.7658946
M11054	5B	433701292	0.084943551	0.24742268	99	0.072323212	0.10325453	0.000821873	-13.45248868
M8706	4A	25985745	0.085140463	0.051546392	99	0.072323212	0.103214847	0.02445357	-22.22772559
M1612	1B	588284390	0.08528996	0.164948454	99	0.072323212	0.103184788	0.077981371	15.80978226
M10884	5B	520209151	0.085552515	0.309278351	99	0.072323212	0.103132135	0.001047298	-13.53619679
M11471	5B	213514296	0.085637327	0.412371134	99	0.072323212	0.103115165	0.002605762	-12.17969367
M8899	4A	668854110	0.085691127	0.237113402	99	0.072323212	0.103104409	0.068129888	12.15159835
M3972	2B	128269909	0.08574354	0.443298969	99	0.072323212	0.103093938	0.00431816	-11.54382317
M6779	3A	722446569	0.085900021	0.288659794	99	0.072323212	0.103062719	0.069952419	12.82836506
M5318	2B	31519188	0.086009263	0.288659794	99	0.072323212	0.103040961	0.019204628	-20.27861845
M4292	2B	143000173	0.086145081	0.484536082	99	0.072323212	0.103013953	0.003272693	-14.36255988
M3153	2A	757979334	0.086270225	0.360824742	99	0.072323212	0.102989108	0.000799912	-13.44433406
M1866	1B	408423217	0.086404312	0.175257732	99	0.072323212	0.102962532	0.081415557	17.0850103
M3828	2B	116410710	0.086423054	0.412371134	99	0.072323212	0.102958821	0.069057525	12.49606097
M411	1A	509033606	0.086425673	0.381443299	99	0.072323212	0.102958302	0.016526631	-19.28418915
M14153	7A	2862136	0.086580037	0.350515464	99	0.072323212	0.102927772	0.010486352	-17.04123202
M8999	4A	642951900	0.086711875	0.195876289	99	0.072323212	0.102901744	0.000413089	-12.99390618
M14286	7A	0	0.086732175	0.422680412	99	0.072323212	0.10289774	0.0862091	18.86501262
M3014	2A	706928677	0.086817568	0.494845361	99	0.072323212	0.102880909	0.002361625	-14.02425026
M1022	1B	46867083	0.087036784	0.278350515	99	0.072323212	0.102837785	0.064200115	10.69234287
M5841	2D	579196310	0.087150797	0.298969072	99	0.072323212	0.102815404	0.066924613	11.70403951
M6637	3A	695160174	0.087461931	0.164948454	99	0.072323212	0.10275449	0.007356254	-15.87892241
M8689	4A	478992616	0.087540607	0.257731959	99	0.072323212	0.102739124	0.07643529	15.2356709
M4737	2B	682744936	0.087558285	0.216494845	99	0.072323212	0.102735674	0.068917646	12.44411916
M8595	4A	392658355	0.087670868	0.443298969	99	0.072323212	0.102713718	0.012092305	-17.63757596
M612	1A	577508619	0.087692701	0.237113402	99	0.072323212	0.102709463	0.002970922	-14.25050237
M5909	2D	615707186	0.087720812	0.391752577	99	0.072323212	0.102703988	0.032221966	-25.11239022
M785	1B	0	0.087726704	0.474226804	99	0.072323212	0.10270284	0.064789139	10.91106699
M13247	6B	178019384	0.087863965	0.381443299	99	0.072323212	0.102676132	0.00341126	-11.88058558
M3695	2B	69066012	0.087943208	0.278350515	99	0.072323212	0.102660734	0.001050447	-13.53736596
M12053	6A	172236575	0.087947945	0.360824742	99	0.072323212	0.102659814	0.004195662	-11.58931092
M14443	7A	352533828	0.087986931	0.474226804	99	0.072323212	0.102652244	0.092973999	21.37704506
M23	1A	3613977	0.088024609	0.298969072	99	0.072323212	0.102644932	0.00219379	-12.33267264
M6102	3A	18171651	0.088208125	0.24742268	99	0.072323212	0.102609367	0.069547683	12.67807293
M15084	7A	723305650	0.088310414	0.268041237	99	0.072323212	0.102589579	0.069256773	12.57004854
M15005	7A	83638613	0.088362899	0.453608247	99	0.072323212	0.102579435	0.019127393	-20.24993848
M9415	4A	1535331	0.088397685	0.474226804	99	0.072323212	0.102572716	0.007154608	-15.8040444
M10087	5A	473613763	0.088534761	0.391752577	99	0.072323212	0.102546266	0.031620972	-24.88922104
M12492	6A	440255570	0.08864149	0.371134021	99	0.072323212	0.102525704	0.072901608	13.92349718
M8909	4A	651825178	0.088662198	0.268041237	99	0.072323212	0.102521717	0.084406078	18.19549015
M8185	3B	820905679	0.08869357	0.113402062	99	0.072323212	0.10251568	0.084790449	18.33822003
M6817	3A	728057245	0.088710014	0.412371134	99	0.072323212	0.102512516	0.084338178	18.17027689
M11870	5B	612532049	0.088835942	0.412371134	99	0.072323212	0.10248831	0.070085381	12.87773811
M12292	6A	17317261	0.08888362	0.237113402	99	0.072323212	0.102479156	0.002064665	-12.38062121
M6679	3A	709595134	0.088961964	0.402061856	99	0.072323212	0.102464124	0.01570908	-18.98060499
M5545	2D	403470553	0.088963016	0.350515464	99	0.072323212	0.102463923	0.00075775	-12.86592226
M4546	2B	566996002	0.088967247	0.381443299	99	0.072323212	0.102463111	0.005468762	-15.17803347
M1578	1B	420600926	0.089014451	0.175257732	99	0.072323212	0.102454062	0.073228071	14.0447236
M2047	1D	10650564	0.089223729	0.268041237	99	0.072323212	0.102414007	0.085018367	18.42285349
M6399	3A	478322209	0.089235029	0.494845361	99	0.072323212	0.102411847	0.01355615	-18.18115037
M13701	6B	710012309	0.089269169	0.288659794	99	0.072323212	0.102405323	0.071223034	13.30018661
M5066	2B	595286130	0.089286851	0.443298969	99	0.072323212	0.102401946	0.009915794	-16.82936495
M953	1B	8569664	0.089323517	0.360824742	99	0.072323212	0.102394944	0.019693897	-20.46030052
M6719	3A	714455841	0.089347385	0.371134021	99	0.072323212	0.102390388	0.002959134	-12.04847485
M6760	3A	585937578	0.089486646	0.06185567	99	0.072323212	0.102363832	0.091799391	20.94087385
M6819	3A	727518767	0.089547982	0.402061856	99	0.072323212	0.10235215	0.007346264	-15.87521288
M15600	7B	0	0.089770539	0.06185567	99	0.072323212	0.102309836	0.021981369	-21.30971494
M968	1B	186541242	0.089809493	0.257731959	99	0.072323212	0.102302441	0.078935002	16.16389732
M11986	5D	548463362	0.089840531	0.288659794	99	0.072323212	0.102296552	0.004164572	-11.60085545
M6003	2D	22651790	0.089891739	0.206185567	99	0.072323212	0.102286841	0.002024836	-12.39541085
M997	1B	41982366	0.089928438	0.237113402	99	0.072323212	0.102279885	0.006160409	-15.43486504
M5121	2B	779147544	0.089944458	0.412371134	99	0.072323212	0.10227685	0.082302695	17.4144342
M14404	7A	333433088	0.089989715	0.164948454	99	0.072323212	0.102268277	0.088960914	19.88685284
M6640	3A	30035287	0.090003122	0.402061856	99	0.072323212	0.102265739	0.003084016	-14.2924981
M4198	2B	151482156	0.0900124	0.082474227	99	0.072323212	0.102263982	0.013290758	-18.08260135
M3954	2B	419769571	0.090151866	0.195876289	99	0.072323212	0.102237604	0.073888862	14.29009748
M4816	2B	732342408	0.090159954	0.237113402	99	0.072323212	0.102236075	0.003932799	-14.6076792
M13387	6B	528330487	0.090260432	0.113402062	99	0.072323212	0.1022171	0.083329361	17.79566945
M2038	1D	25443095	0.090302681	0.288659794	99	0.072323212	0.102209129	0.010962871	-17.21817961
M15271	7B	85150808	0.090380014	0.206185567	99	0.072323212	0.102194548	0.003221316	-14.34348202
M14230	7A	12099978	0.090391794	0.06185567	99	0.072323212	0.102192328	0.094540463	21.9587252
M304	1A	462698997	0.090517046	0.072164948	99	0.072323212	0.102168745	0.085026246	18.42577916
M9201	4A	714077495	0.090535477	0.144329897	99	0.072323212	0.102165278	0.018276919	-19.93412942
M10851	5B	126862058	0.090544512	0.175257732	99	0.072323212	0.102163579	0.072576809	13.80288837
M9529	4B	537435483	0.090551406	0.371134021	99	0.072323212	0.102162282	0.104263318	25.56914528
M9528	4B	410992756	0.090551406	0.371134021	99	0.072323212	0.102162282	0.033452007	-25.56914528
M9009	4A	659089834	0.090655495	0.494845361	99	0.072323212	0.102142719	0.005017605	-11.28409598
M9006	4A	668285271	0.090733466	0.206185567	99	0.072323212	0.102128081	0.07493455	14.67839641
M1214	1B	111837904	0.090986165	0.494845361	99	0.072323212	0.102080736	0.005932095	-10.94451539
M8728	4A	90891330	0.091089134	0.309278351	99	0.072323212	0.102061486	0.003468042	-14.43509961
M14197	7A	6351266	0.091228796	0.288659794	99	0.072323212	0.102035414	0.071646931	13.45759384
M3528	2B	27010782	0.09127689	0.288659794	99	0.072323212	0.102026446	0.066344193	11.48851046
M8279	3D	10340203	0.091318055	0.350515464	99	0.072323212	0.102018774	0.073157304	14.01844546
M4872	2B	743417549	0.09132366	0.484536082	99	0.072323212	0.10201773	0.066024605	11.3698365
M8057	3B	0	0.091406962	0.371134021	99	0.072323212	0.102002218	0.092963953	21.37331442
M6775	3A	0	0.091444018	0.381443299	99	0.072323212	0.101995323	0.009086393	-16.52138043
M9186	4A	712151623	0.091558998	0.484536082	99	0.072323212	0.101973947	0.014563031	-18.55503876
M935	1B	17537164	0.091649873	0.298969072	99	0.072323212	0.101957074	0.003775277	-11.74541395
M8098	3B	702728099	0.091682855	0.164948454	99	0.072323212	0.101950954	0.001833678	-13.82820581
M4105	2B	510796274	0.091764488	0.371134021	99	0.072323212	0.101935819	0.03423865	-25.8612522
M94	1A	10241942	0.091929257	0.298969072	99	0.072323212	0.101905314	0.006696996	-10.66048213
M6402	3A	407747638	0.091939373	0.216494845	99	0.072323212	0.101903443	0.00107489	-13.54644266
M6516	3A	481213917	0.091973938	0.371134021	99	0.072323212	0.101897052	0.004812166	-11.36038238
M7115	3B	20952119	0.092018178	0.463917526	99	0.072323212	0.101888876	0.01060015	-17.08348905
M15121	7A	729402509	0.092094565	0.463917526	99	0.072323212	0.10187477	0.077339096	15.57128417
M2688	2A	729311539	0.092172306	0.216494845	99	0.072323212	0.101860427	0.011548368	-17.43559382
M12728	6A	0	0.092220393	0.391752577	99	0.072323212	0.101851561	0.000748279	-13.42516091
M2494	2A	10263416	0.092242617	0.288659794	99	0.072323212	0.101847466	0.075134569	14.75266995
M9692	4B	661245757	0.092330707	0.412371134	99	0.072323212	0.101831243	0.000532167	-12.94968874
M7547	3B	498344378	0.092334452	0.350515464	99	0.072323212	0.101830554	0.100482891	24.1653469
M5835	2D	587202661	0.092464222	0.432989691	99	0.072323212	0.101806687	0.003573577	-14.4742882
M5050	2B	442156608	0.092466446	0.402061856	99	0.072323212	0.101806278	0.075021383	14.71064034
M9048	4A	654345599	0.092539159	0.463917526	99	0.072323212	0.101792922	0.005140298	-15.05606411
M1798	1B	646777010	0.092542703	0.020618557	99	0.072323212	0.101792271	0.056416929	-34.09678643
M15146	7A	113229613	0.0925572	0.432989691	99	0.072323212	0.10178961	0.079743835	16.4642442
M10596	5B	20167023	0.092606354	0.371134021	99	0.072323212	0.10178059	0.002891294	-14.22093377
M7450	3B	242490336	0.092699134	0.237113402	99	0.072323212	0.101763578	0.069277263	12.57765682
M10404	5A	600359375	0.092791264	0.278350515	99	0.072323212	0.101746703	0.076548034	15.27753659
M15407	7B	508801043	0.092814377	0.494845361	99	0.072323212	0.101742473	0.07834562	15.9450403
M5843	2D	571082311	0.092886068	0.154639175	99	0.072323212	0.101729359	0.078025165	15.82604443
M8144	3B	416115200	0.092916535	0.484536082	99	0.072323212	0.101723789	0.071955182	13.57205766
M8116	3B	596722094	0.092944594	0.257731959	99	0.072323212	0.101718661	0.064128417	10.66571877
M4353	2B	91206725	0.092977506	0.24742268	99	0.072323212	0.101712648	0.073246381	14.05152273
M14351	7A	0	0.09300353	0.24742268	99	0.072323212	0.101707896	0.010882721	-17.18841701
M4433	2B	620232232	0.09316907	0.319587629	99	0.072323212	0.101677699	0.072270903	13.68929542
M3892	2B	110980776	0.093212283	0.175257732	99	0.072323212	0.101669826	0.07768289	15.69894666
M4751	2B	600038125	0.093298774	0.453608247	99	0.072323212	0.10165408	0.010211136	-16.93903507
M6810	3A	0	0.093355753	0.422680412	99	0.072323212	0.101643716	0.078902798	16.15193892
M11032	5B	487460716	0.093366579	0.309278351	99	0.072323212	0.101641748	0.000860118	-13.46669033
M5519	2D	74929509	0.093452951	0.402061856	99	0.072323212	0.101626052	0.002462023	-12.23306886
M9015	4A	212069460	0.093672403	0.360824742	99	0.072323212	0.101586246	0.073845223	14.27389265
M13177	6B	0	0.093775427	0.443298969	99	0.072323212	0.101567594	0.004654171	-11.41905115
M11661	5B	203695574	0.093829378	0.226804124	99	0.072323212	0.101557836	0.074654669	14.57446699
M14948	7A	704615462	0.093893265	0.443298969	99	0.072323212	0.101546288	0.076370884	15.21175507
M7134	3B	23945411	0.093901989	0.24742268	99	0.072323212	0.101544712	0.072733205	13.86096346
M8924	4A	50074687	0.094143785	0.041237113	99	0.072323212	0.10150109	0.029354866	-24.0477403
M14963	7A	477189698	0.09431909	0.18556701	99	0.072323212	0.101469541	0.001129053	-13.56655492
M9179	4A	709851704	0.094321073	0.360824742	99	0.072323212	0.101469185	0.072034453	13.60149349
M14886	7A	674740734	0.094346061	0.412371134	99	0.072323212	0.101464693	0.005472086	-15.17926794
M4681	2B	706398142	0.094379908	0.484536082	99	0.072323212	0.101458611	0.007337694	-10.42256959
M3707	2B	293132103	0.094403629	0.134020619	99	0.072323212	0.10145435	0.077615144	15.67379017
M13110	6B	39809227	0.09446382	0.422680412	99	0.072323212	0.101443544	0.004238231	-11.57350374
M5028	2B	758922449	0.094553714	0.422680412	99	0.072323212	0.101427418	0.08106762	16.95580942
M5160	2B	782126877	0.094763561	0.24742268	99	0.072323212	0.101389841	0.070722085	13.11416741
M615	1A	575190181	0.094776853	0.432989691	99	0.072323212	0.101387464	0.006458505	-10.74904194
M15448	7B	582709177	0.094908198	0.463917526	99	0.072323212	0.101363995	0.080260362	16.65604784
M8991	4A	56983113	0.094925814	0.371134021	99	0.072323212	0.10136085	0.075279205	14.80637816
M2446	2A	20323654	0.094938706	0.216494845	99	0.072323212	0.101358549	0.004922996	-14.97537261
M7784	3B	527558091	0.09503902	0.371134021	99	0.072323212	0.101340655	0.100655293	24.22936554
M6383	3A	512275545	0.095155905	0.371134021	99	0.072323212	0.101319831	0.071347736	13.3464926
M11978	5D	547236722	0.095168952	0.041237113	99	0.072323212	0.101317509	0.098162925	23.30386601
M6686	3A	711115907	0.095183803	0.072164948	99	0.072323212	0.101314866	0.085360782	18.55000355
M3721	2B	49874133	0.095268472	0.041237113	99	0.072323212	0.101299804	0.028588664	-23.76322399
M9792	4D	465185311	0.095469366	0.237113402	99	0.072323212	0.101264127	0.071216494	13.29775823
M13616	6B	0	0.095470771	0.329896907	99	0.072323212	0.101263877	0.071257457	13.312969
M2447	2A	10314254	0.09561839	0.484536082	99	0.072323212	0.101237715	0.108226723	27.04088995
M2465	2A	20237416	0.09561839	0.484536082	99	0.072323212	0.101237715	0.108226723	27.04088995
M2337	2A	438585017	0.09561839	0.484536082	99	0.072323212	0.101237715	0.037415413	-27.04088995
M2695	2A	227082704	0.09561839	0.484536082	99	0.072323212	0.101237715	0.037415413	-27.04088995
M2723	2A	502634131	0.09561839	0.484536082	99	0.072323212	0.101237715	0.037415413	-27.04088995
M4714	2B	717127183	0.095642411	0.164948454	99	0.072323212	0.101233462	0.00702488	-15.75587228
M13715	6B	0	0.095722575	0.453608247	99	0.072323212	0.101219277	0.00800351	-16.1192702
M13238	6B	159138920	0.095748901	0.319587629	99	0.072323212	0.101214621	0.066046244	11.37787193
M11674	5B	631373208	0.095770762	0.226804124	99	0.072323212	0.101210756	9.23E-07	-13.14764285
M6437	3A	526866497	0.095884206	0.257731959	99	0.072323212	0.101190716	0.071177744	13.28336901
M12011	5D	552080511	0.095890032	0.484536082	99	0.072323212	0.101189688	0.001998106	-13.88926344
M7586	3B	534166530	0.09605389	0.18556701	99	0.072323212	0.10116079	0.00057721	-13.36163727
M8889	4A	747299239	0.096069081	0.484536082	99	0.072323212	0.101158114	0.074370389	14.46890433
M12627	6A	566632377	0.096260835	0.350515464	99	0.072323212	0.101124371	0.069554529	12.6806151
M12052	6A	0	0.096297141	0.134020619	99	0.072323212	0.101117991	0.079403265	16.33777906
M5247	2B	477446953	0.096470342	0.113402062	99	0.072323212	0.10108759	0.013449797	-18.14165785
M12764	6A	391337338	0.096487531	0.175257732	99	0.072323212	0.101084576	0.001589004	-13.7373501
M175	1A	35112909	0.096605466	0.268041237	99	0.072323212	0.101063915	0.075281202	14.80711962
M6754	3A	464718567	0.096609584	0.391752577	99	0.072323212	0.101063194	0.019854383	-20.51989405
M9704	4B	86304081	0.096681998	0.360824742	99	0.072323212	0.101050521	0.107101453	26.62303938
M286	1A	336610798	0.096717592	0.082474227	99	0.072323212	0.101044296	0.022014797	-21.32212805
M5594	2D	708346816	0.096730752	0.329896907	99	0.072323212	0.101041995	0.00060652	-12.92207881
M2924	2A	691480240	0.096791442	0.144329897	99	0.072323212	0.101031389	0.003782902	-14.55201762
M12699	6A	537865949	0.096852036	0.494845361	99	0.072323212	0.101020807	0.001193816	-12.70399619
M10831	5B	37974769	0.096884318	0.154639175	99	0.072323212	0.101015172	0.074839231	14.64300115
M2495	2A	36696937	0.096901112	0.453608247	99	0.072323212	0.101012241	0.089403149	20.05106943
M4743	2B	195996061	0.09693811	0.484536082	99	0.072323212	0.101005787	0.00367972	-14.51370255
M584	1A	0	0.096961615	0.340206186	99	0.072323212	0.101001688	0.150312962	42.66891317
M8083	3B	49383194	0.097071207	0.371134021	99	0.072323212	0.100982591	0.103317017	25.21775223
M8015	3B	10930676	0.097071207	0.371134021	99	0.072323212	0.100982591	0.032505706	-25.21775223
M8018	3B	771630784	0.097071207	0.371134021	99	0.072323212	0.100982591	0.032505706	-25.21775223
M8078	3B	793010867	0.097071207	0.371134021	99	0.072323212	0.100982591	0.032505706	-25.21775223
M8086	3B	796453795	0.097071207	0.371134021	99	0.072323212	0.100982591	0.032505706	-25.21775223
M9696	4B	562337110	0.097080885	0.432989691	99	0.072323212	0.100980905	0.002525241	-14.08500611
M13134	6B	64739569	0.097152916	0.092783505	99	0.072323212	0.100968368	0.080348953	16.6889446
M1454	1B	99914122	0.097224133	0.154639175	99	0.072323212	0.100955982	0.020048819	-20.59209489
M121	1A	21638580	0.097287284	0.494845361	99	0.072323212	0.100945007	0.07296815	13.94820638
M10372	5A	572020800	0.097365755	0.257731959	99	0.072323212	0.100931382	0.06962436	12.70654563
M6720	3A	714455841	0.097534706	0.319587629	99	0.072323212	0.100902086	0.003448188	-11.86687302
M3128	2A	751913366	0.097582421	0.494845361	99	0.072323212	0.100893822	0.072524757	13.78355994
M14295	7A	50589773	0.097915608	0.041237113	99	0.072323212	0.100836244	0.113258328	28.90929235
M191	1A	50281762	0.097958777	0.391752577	99	0.072323212	0.1008288	0.004397142	-11.51449468
M9735	4D	681466316	0.098061139	0.432989691	99	0.072323212	0.100811163	0.011466925	-17.40535166
M14220	7A	10866345	0.098063815	0.010309278	99	0.072323212	0.100810702	0.085999355	-45.08172732
M11428	5B	13284590	0.098170968	0.340206186	99	0.072323212	0.100792262	0.007866871	-10.22606868
M4516	2B	568309420	0.098315478	0.412371134	99	0.072323212	0.100767429	0.073728888	14.23069386
M6436	3A	535005885	0.09838341	0.103092784	99	0.072323212	0.100755769	0.090992422	20.64121949
M15257	7B	65660970	0.098386526	0.319587629	99	0.072323212	0.100755234	0.001177675	-13.58460992
M11097	5B	592513263	0.098428754	0.041237113	99	0.072323212	0.100747991	0.03791351	-27.22585022
M5182	2B	771074424	0.098455153	0.453608247	99	0.072323212	0.100743464	0.071613439	13.44515701
M14424	7A	35387463	0.098478889	0.463917526	99	0.072323212	0.100739396	0.073989048	14.32729973
M14212	7A	10884688	0.098598128	0.360824742	99	0.072323212	0.100718973	0.1230948	32.56190225
M14515	7A	57742411	0.098598128	0.360824742	99	0.072323212	0.100718973	0.1230948	32.56190225
M15017	7A	713138041	0.098598128	0.360824742	99	0.072323212	0.100718973	0.1230948	32.56190225
M15019	7A	712493182	0.098598128	0.360824742	99	0.072323212	0.100718973	0.1230948	32.56190225
M5178	2B	0	0.098598128	0.360824742	99	0.072323212	0.100718973	0.1230948	32.56190225
M5212	2B	116192482	0.098598128	0.360824742	99	0.072323212	0.100718973	0.1230948	32.56190225
M6730	3A	0	0.098598128	0.360824742	99	0.072323212	0.100718973	0.1230948	32.56190225
M8197	3B	819744121	0.098598128	0.360824742	99	0.072323212	0.100718973	0.1230948	32.56190225
M11913	5D	341609030	0.098598128	0.360824742	99	0.072323212	0.100718973	0.052283489	-32.56190225
M5196	2B	788005120	0.098598128	0.360824742	99	0.072323212	0.100718973	0.052283489	-32.56190225
M12491	6A	440255570	0.09863853	0.092783505	99	0.072323212	0.100712059	0.014191877	-18.41721684
M133	1A	46292062	0.098726711	0.381443299	99	0.072323212	0.100696981	0.001613208	-13.74633772
M12531	6A	623438271	0.098770699	0.494845361	99	0.072323212	0.100689464	0.062582471	10.09165739
M1273	1B	4383550	0.098951123	0.360824742	99	0.072323212	0.100658674	0.071394013	13.36367697
M3557	2B	19611130	0.099039488	0.432989691	99	0.072323212	0.100643616	0.072243868	13.67925647
M15313	7B	333414790	0.099047308	0.494845361	99	0.072323212	0.100642284	0.001061378	-13.54142498
M4609	2B	574820263	0.099259126	0.381443299	99	0.072323212	0.100606255	0.003474981	-11.85692367
M866	1B	496978998	0.099270956	0.360824742	99	0.072323212	0.100604245	0.065997701	11.35984624
M13817	6B	715321146	0.099329121	0.494845361	99	0.072323212	0.100594367	0.076627192	15.3069306
M4099	2B	419320938	0.09939217	0.350515464	99	0.072323212	0.100583668	0.051373463	-32.22397933
M9154	4A	708632121	0.099467179	0.24742268	99	0.072323212	0.100570948	0.067809911	12.03278023
M5044	2B	754864756	0.099599927	0.164948454	99	0.072323212	0.100548463	0.019216037	-20.28285518
M3784	2B	91146822	0.099621407	0.144329897	99	0.072323212	0.100544828	0.00313664	-14.31203893
M7640	3B	439813360	0.099713744	0.268041237	99	0.072323212	0.100529212	0.068927318	12.44771071
M3708	2B	293132103	0.099766863	0.154639175	99	0.072323212	0.100520235	0.004586837	-14.85054553
M11244	5B	526607377	0.099782041	0.422680412	99	0.072323212	0.100517671	0.008963737	-16.47583418
M12841	6A	112239421	0.099845585	0.24742268	99	0.072323212	0.100506942	0.013123514	-18.02049814
M9675	4B	14423465	0.099850302	0.06185567	99	0.072323212	0.100506146	0.093582627	21.60304884
M11482	5B	606870741	0.099850835	0.113402062	99	0.072323212	0.100506056	0.077972494	15.80648627
M9046	4A	658343323	0.100008111	0.206185567	99	0.072323212	0.100479534	0.004769269	-14.91828848
M15169	7B	66548049	0.100083591	0.453608247	99	0.072323212	0.100466822	0.077073518	15.47266652
M8860	4A	49224781	0.100086987	0.494845361	99	0.072323212	0.10046625	0.067333377	11.85582736
M3575	2B	33729208	0.100093195	0.422680412	99	0.072323212	0.100465205	0.072518199	13.78112472
M3020	2A	716906689	0.100119455	0.268041237	99	0.072323212	0.100460786	0.004185905	-11.59293413
M6201	3A	23155739	0.100251021	0.453608247	99	0.072323212	0.100438662	0.079069537	16.21385484
M4639	2B	704429297	0.100309624	0.257731959	99	0.072323212	0.100428818	0.065979538	11.35310163
M10967	5B	393940604	0.100323771	0.463917526	99	0.072323212	0.100426443	0.005032237	-11.27866255
M5048	2B	521686423	0.100376096	0.24742268	99	0.072323212	0.10041766	0.075227474	14.78716855
M9144	4A	304763961	0.100410432	0.484536082	99	0.072323212	0.1004119	0.000818753	-13.45133042
M1828	1B	659387123	0.100470321	0.402061856	99	0.072323212	0.100401857	0.062763534	10.15889232
M733	1B	0	0.100509988	0.360824742	99	0.072323212	0.10039521	0.06917406	12.53933438
M8709	4A	742590041	0.100610218	0.216494845	99	0.072323212	0.100378425	0.00366301	-14.50749781
M15225	7B	474475078	0.100612585	0.350515464	99	0.072323212	0.100378029	3.33E-05	-13.1349313
M15165	7B	6150408	0.100687165	0.453608247	99	0.072323212	0.100365552	0.005585814	-15.22149876
M4312	2B	456976627	0.100692123	0.237113402	99	0.072323212	0.100364723	0.002476567	-12.22766801
M7213	3B	37643831	0.10089375	0.041237113	99	0.072323212	0.100331045	0.039042269	-27.64499577
M9378	4A	0	0.100894953	0.360824742	99	0.072323212	0.100330845	0.087442795	19.32312463
M15568	7B	672025248	0.100898077	0.154639175	99	0.072323212	0.100330324	0.000721107	-12.879529
M1538	1B	568960943	0.100933999	0.474226804	99	0.072323212	0.100324332	0.001528169	-12.57983983
M3117	2A	742560803	0.101055078	0.288659794	99	0.072323212	0.100304153	0.001835356	-12.46577102
M6138	3A	286518666	0.101164303	0.381443299	99	0.072323212	0.100285972	0.000333967	-13.27131299
M9190	4A	711885159	0.101177962	0.154639175	99	0.072323212	0.1002837	0.01122624	-17.31597729
M14098	6D	461702450	0.101178935	0.360824742	99	0.072323212	0.100283538	0.12316541	32.58812232
M1384	1B	468389248	0.10119922	0.432989691	99	0.072323212	0.100280165	0.004685708	-11.40734055
M10859	5B	398970101	0.101214969	0.340206186	99	0.072323212	0.100277546	0.158816088	45.82640729
M7128	3B	7607466	0.101214969	0.340206186	99	0.072323212	0.100277546	0.158816088	45.82640729
M9232	4A	26495448	0.101386288	0.422680412	99	0.072323212	0.10024909	0.062118464	9.919356212
M430	1A	940053	0.101415639	0.340206186	99	0.072323212	0.10024422	0.15507397	44.43683402
M6205	3A	567030074	0.101415639	0.340206186	99	0.072323212	0.10024422	0.15507397	44.43683402
M15041	7A	720347008	0.101415639	0.340206186	99	0.072323212	0.10024422	0.084262659	-44.43683402
M15072	7A	712981055	0.101415639	0.340206186	99	0.072323212	0.10024422	0.084262659	-44.43683402
M8080	3B	793102915	0.101415639	0.340206186	99	0.072323212	0.10024422	0.084262659	-44.43683402
M9326	4A	650837952	0.101415639	0.340206186	99	0.072323212	0.10024422	0.084262659	-44.43683402
M6392	3A	363608529	0.1016362	0.463917526	99	0.072323212	0.100207675	0.002276237	-13.99254266
M9000	4A	642951900	0.101644826	0.443298969	99	0.072323212	0.100206248	0.0722117	13.6673113
M10844	5B	0	0.101654623	0.041237113	99	0.072323212	0.100204627	0.031683473	-24.91242956
M5826	2D	588434693	0.101715566	0.443298969	99	0.072323212	0.100194547	0.010145024	-16.91448561
M14796	7A	626955964	0.101772261	0.030927835	99	0.072323212	0.100185175	0.105322149	25.96232455
M9756	4D	220375714	0.101787361	0.092783505	99	0.072323212	0.10018268	0.085459002	18.58647613
M9328	4A	8252743	0.101788022	0.412371134	99	0.072323212	0.100182571	0.098893259	23.57506364
M146	1A	26318658	0.101887142	0.309278351	99	0.072323212	0.100166204	0.073967528	14.31930887
M11300	5B	261777240	0.101904829	0.432989691	99	0.072323212	0.100163285	0.069821849	12.77988006
M8611	4A	110875760	0.101967859	0.443298969	99	0.072323212	0.100152888	0.067374129	11.87096002
M8746	4A	478288955	0.102032773	0.391752577	99	0.072323212	0.100142188	0.004490608	-14.81481254
M1114	1B	74705448	0.102039382	0.113402062	99	0.072323212	0.100141099	0.076483893	15.25371895
M14029	6D	376894633	0.102052983	0.154639175	99	0.072323212	0.100138858	0.072197676	13.66210357
M6506	3A	612522251	0.102066767	0.041237113	99	0.072323212	0.100136588	0.028579204	-23.75971114
M6612	3A	681663202	0.102078901	0.463917526	99	0.072323212	0.100134589	0.068525264	12.29841466
M15340	7B	254066318	0.102193927	0.051546392	99	0.072323212	0.100115657	0.107041251	26.60068445
M3595	2B	506395762	0.102208351	0.412371134	99	0.072323212	0.100113285	0.070601042	13.06922038
M9334	4A	720048127	0.102274866	0.412371134	99	0.072323212	0.100102349	0.074701696	14.5919298
M12262	6A	319197077	0.102465594	0.443298969	99	0.072323212	0.100071037	0.065264341	11.08752535
M2260	1D	471927480	0.102555214	0.453608247	99	0.072323212	0.100056346	0.064942146	10.96788336
M14263	7A	0	0.102562761	0.422680412	99	0.072323212	0.10005511	0.002626917	-12.17183823
M962	1B	499209336	0.10265147	0.226804124	99	0.072323212	0.100040583	0.073657452	14.20416708
M13156	6B	0	0.102675882	0.350515464	99	0.072323212	0.100036588	0.003899357	-11.69933868
M8558	4A	63814925	0.102686184	0.195876289	99	0.072323212	0.100034903	0.004838844	-14.94412392
M8994	4A	637896815	0.102700089	0.278350515	99	0.072323212	0.100032628	0.003111682	-11.99182875
M707	1B	7160758	0.102887905	0.309278351	99	0.072323212	0.100001935	0.00417776	-11.59595861
M5806	2D	0	0.102915464	0.164948454	99	0.072323212	0.099997436	0.06991447	12.81427332
M15449	7B	584025901	0.102957029	0.144329897	99	0.072323212	0.099990654	0.005802504	-15.3019632
M11658	5B	336655975	0.103056399	0.082474227	99	0.072323212	0.099974452	0.080900969	16.89392646
M13532	6B	655890375	0.103062145	0.340206186	99	0.072323212	0.099973516	0.113177411	28.87924516
M4656	2B	707465009	0.103193573	0.350515464	99	0.072323212	0.099952115	0.001891995	-13.84986099
M13155	6B	0	0.103278896	0.350515464	99	0.072323212	0.099938238	0.003499179	-11.84793815
M10805	5B	389819412	0.103310833	0.463917526	99	0.072323212	0.099933047	0.000840842	-13.4595327
M9308	4A	1131864	0.103441848	0.463917526	99	0.072323212	0.099911771	0.064114349	10.66049497
M8496	3D	596995100	0.103462033	0.257731959	99	0.072323212	0.099908495	0.069828324	12.78228428
M3579	2B	40893976	0.103504661	0.381443299	99	0.072323212	0.099901581	0.001252658	-13.61245382
M6407	3A	535727949	0.103535126	0.113402062	99	0.072323212	0.099896641	0.092929669	21.36058388
M5596	2D	88591365	0.103700913	0.463917526	99	0.072323212	0.099869787	0.063732757	10.51879696
M7306	3B	537220619	0.103707362	0.18556701	99	0.072323212	0.099868744	0.001568598	-12.5648271
M332	1A	474702375	0.103779353	0.010309278	99	0.072323212	0.099857099	0.081338357	-43.35094312
M8218	3B	826654769	0.103779353	0.010309278	99	0.072323212	0.099857099	0.081338357	-43.35094312
M4782	2B	724734855	0.103833085	0.175257732	99	0.072323212	0.099848413	0.003223412	-14.34426034
M6423	3A	482497660	0.103935308	0.278350515	99	0.072323212	0.099831903	0.003127121	-14.3085044
M5430	2D	28763272	0.103975556	0.268041237	99	0.072323212	0.099825407	0.069412657	12.62793344
M8626	4A	127984252	0.103975848	0.432989691	99	0.072323212	0.09982536	0.005488037	-15.1851912
M9013	4A	212069460	0.104006203	0.195876289	99	0.072323212	0.099820463	0.001011975	-12.77151992
M3831	2B	143000939	0.104017509	0.18556701	99	0.072323212	0.099818639	0.000877612	-13.47318659
M3663	2B	59764104	0.10402199	0.298969072	99	0.072323212	0.099817916	0.001256904	-13.61403054
M15388	7B	446996734	0.104059996	0.103092784	99	0.072323212	0.099811788	0.080145785	16.61350145
M12192	6A	9372486	0.104159319	0.237113402	99	0.072323212	0.099795785	0.06913759	12.52579171
M7119	3B	26451492	0.104189199	0.453608247	99	0.072323212	0.099790974	0.072509487	13.77788935
M5257	2B	765373126	0.104205562	0.092783505	99	0.072323212	0.09978834	0.010801702	-17.15833204
M12032	5D	711579175	0.10422494	0.371134021	99	0.072323212	0.099785221	0.087987186	19.52527503
M14379	7A	0	0.104240916	0.216494845	99	0.072323212	0.09978265	0.075214772	14.78245189
M8811	4A	0	0.104249167	0.484536082	99	0.072323212	0.099781322	0.07725546	15.54022765
M13273	6B	196677969	0.104263508	0.453608247	99	0.072323212	0.099779015	0.006699971	-15.63522267
M4651	2B	630100686	0.104330423	0.340206186	99	0.072323212	0.099768255	0.070398883	12.99415199
M6837	3A	374475866	0.104332794	0.113402062	99	0.072323212	0.099767874	0.075523441	14.89707115
M649	1A	132445223	0.104416155	0.494845361	99	0.072323212	0.099754481	0.003268045	-14.36083408
M8893	4A	635530599	0.104621982	0.257731959	99	0.072323212	0.099721461	0.068508737	12.29227749
M5802	2D	729134384	0.104736103	0.402061856	99	0.072323212	0.099703185	0.073731771	14.23176435
M6225	3A	116123448	0.104786664	0.412371134	99	0.072323212	0.099695095	0.07430771	14.44562965
M6630	3A	736712221	0.105031304	0.268041237	99	0.072323212	0.099656011	0.073235742	14.04757212
M3086	2A	606133132	0.105095611	0.195876289	99	0.072323212	0.099645754	0.002609863	-14.11642919
M1174	1B	116005844	0.105202166	0.237113402	99	0.072323212	0.099628775	0.003518004	-14.45365228
M8504	3D	603669558	0.105211887	0.237113402	99	0.072323212	0.099627227	0.071390681	13.3624397
M1355	1B	7319459	0.105222622	0.402061856	99	0.072323212	0.099625517	0.014620081	-18.57622326
M10212	5A	512585815	0.105344395	0.340206186	99	0.072323212	0.09960614	0.000289574	-13.03977142
M5102	2B	0	0.105373434	0.06185567	99	0.072323212	0.099601523	0.087757435	19.43996103
M11079	5B	505694656	0.10537591	0.288659794	99	0.072323212	0.099601129	0.075004889	14.70451527
M2744	2A	188730587	0.105508161	0.175257732	99	0.072323212	0.09958012	0.076894566	15.4062155
M12026	5D	629968953	0.105531599	0.051546392	99	0.072323212	0.099576399	0.02417751	-22.12521528
M231	1A	261892580	0.105543374	0.412371134	99	0.072323212	0.099574531	0.00320293	-11.95794547
M588	1A	398246596	0.105572346	0.18556701	99	0.072323212	0.099569934	0.075387308	14.84652045
M11921	5D	363181276	0.105577843	0.360824742	99	0.072323212	0.099569062	0.03861991	-27.48816006
M13154	6B	88747690	0.105626167	0.226804124	99	0.072323212	0.099561398	0.069529605	12.67136016
M10630	5B	32418282	0.105635609	0.463917526	99	0.072323212	0.099559901	0.001662322	-12.53002434
M8099	3B	702728099	0.105646087	0.12371134	99	0.072323212	0.09955824	0.006628221	-15.60857956
M760	1B	13027114	0.105768301	0.329896907	99	0.072323212	0.099538879	0.003546109	-11.83051158
M3472	2B	11188490	0.105814465	0.164948454	99	0.072323212	0.099531573	0.073938309	14.30845876
M7717	3B	0	0.105937702	0.350515464	99	0.072323212	0.099512085	0.06976222	12.7577377
M6334	3A	433329293	0.105940246	0.278350515	99	0.072323212	0.099511683	0.00878261	-16.40857603
M5626	2D	568465158	0.105956973	0.422680412	99	0.072323212	0.09950904	0.081648641	17.17156186
M14976	7A	711824297	0.105988555	0.12371134	99	0.072323212	0.09950405	0.084514434	18.2357265
M11445	5B	651115539	0.106050256	0.134020619	99	0.072323212	0.099494308	0.003279816	-14.36520515
M10783	5B	412238621	0.106058647	0.443298969	99	0.072323212	0.099492984	0.010732856	-17.13276722
M9573	4B	15752078	0.106118442	0.422680412	99	0.072323212	0.099483549	0.069882079	12.8022455
M2246	1D	463949567	0.106206703	0.113402062	99	0.072323212	0.099469634	0.090847342	20.58734615
M10911	5B	369307760	0.106223118	0.319587629	99	0.072323212	0.099467048	0.005212778	-15.08297818
M8832	4A	3319046	0.10633021	0.268041237	99	0.072323212	0.099450184	0.004148508	-11.60682052
M14091	6D	462479338	0.106360384	0.082474227	99	0.072323212	0.099445436	0.018758231	-20.11285661
M10048	5A	475372989	0.106576742	0.092783505	99	0.072323212	0.099411434	0.016504494	-19.27596887
M706	1B	3572450	0.106596483	0.474226804	99	0.072323212	0.099408336	0.063027832	10.257035
M11941	5D	490937616	0.106820734	0.484536082	99	0.072323212	0.099373182	0.069787865	12.76726059
M7675	3B	154191322	0.106870825	0.453608247	99	0.072323212	0.099365341	0.076123998	15.12007802
M1293	1B	420864193	0.106942385	0.340206186	99	0.072323212	0.099354146	0.160906623	46.60269273
M13708	6B	709011092	0.106942385	0.340206186	99	0.072323212	0.099354146	0.160906623	46.60269273
M2151	1D	417084354	0.106942385	0.340206186	99	0.072323212	0.099354146	0.160906623	46.60269273
M5913	2D	606124230	0.106942385	0.340206186	99	0.072323212	0.099354146	0.160906623	46.60269273
M6871	3A	741359064	0.106942385	0.340206186	99	0.072323212	0.099354146	0.160906623	46.60269273
M1010	1B	39514123	0.106942385	0.340206186	99	0.072323212	0.099354146	0.090095313	-46.60269273
M1011	1B	270737840	0.106942385	0.340206186	99	0.072323212	0.099354146	0.090095313	-46.60269273
M10355	5A	567120913	0.106942385	0.340206186	99	0.072323212	0.099354146	0.090095313	-46.60269273
M11377	5B	99660656	0.106942385	0.340206186	99	0.072323212	0.099354146	0.090095313	-46.60269273
M1195	1B	111836824	0.106942385	0.340206186	99	0.072323212	0.099354146	0.090095313	-46.60269273
M4597	2B	0	0.106942385	0.340206186	99	0.072323212	0.099354146	0.090095313	-46.60269273
M1212	1B	118849938	0.107001397	0.309278351	99	0.072323212	0.099344921	0.105667624	26.09061096
M13230	6B	78513755	0.107081305	0.092783505	99	0.072323212	0.099332438	0.081825246	17.23714152
M759	1B	13027114	0.107154114	0.381443299	99	0.072323212	0.099321073	0.001586423	-12.5582083
M9551	4B	594693866	0.10719013	0.072164948	99	0.072323212	0.099315455	0.011513381	-17.42260215
M11907	5D	254497566	0.107211976	0.175257732	99	0.072323212	0.099312047	0.076636517	15.31039337
M8863	4A	12656052	0.107279857	0.391752577	99	0.072323212	0.099301466	0.016752467	-19.36804927
M12062	6A	5854616	0.107346902	0.134020619	99	0.072323212	0.099291022	0.006781613	-15.66553906
M6143	3A	20335431	0.107460527	0.18556701	99	0.072323212	0.099273339	0.074513692	14.52211765
M11863	5B	0	0.107520829	0.350515464	99	0.072323212	0.099263962	0.078925021	16.16019129
M11887	5D	27437516	0.107520829	0.350515464	99	0.072323212	0.099263962	0.078925021	16.16019129
M1147	1B	37570116	0.107531117	0.226804124	99	0.072323212	0.099262363	0.076022383	15.08234495
M1852	1B	665113180	0.107539947	0.268041237	99	0.072323212	0.099260991	0.004976333	-11.29942185
M300	1A	387369246	0.107584846	0.474226804	99	0.072323212	0.099254015	0.003789493	-14.55446507
M924	1B	385657223	0.1076739	0.257731959	99	0.072323212	0.099240188	0.002448385	-14.0564671
M970	1B	137130287	0.107700263	0.18556701	99	0.072323212	0.099236097	0.007686444	-16.00153286
M10209	5A	512599884	0.107731503	0.391752577	99	0.072323212	0.099231251	0.070085619	12.87782646
M144	1A	20237352	0.107747475	0.474226804	99	0.072323212	0.099228774	0.002199859	-13.96418115
M2207	1D	475499558	0.10775196	0.268041237	99	0.072323212	0.099228078	0.081816765	17.23399191
M9754	4D	80836783	0.107757113	0.402061856	99	0.072323212	0.099227279	0.031213395	-24.73787404
M8891	4A	668288144	0.107866386	0.453608247	99	0.072323212	0.099210345	0.07627561	15.17637663
M13159	6B	119525391	0.107893082	0.432989691	99	0.072323212	0.099206211	0.003463149	-14.43328276
M9807	4D	328559907	0.108146903	0.298969072	99	0.072323212	0.09916696	0.066751753	11.63985113
M3678	2B	38442340	0.108205362	0.474226804	99	0.072323212	0.099157935	0.062224353	9.958676509
M9764	4D	370674103	0.108264222	0.268041237	99	0.072323212	0.099148853	0.005352753	-11.15964455
M7273	3B	49148259	0.108402067	0.453608247	99	0.072323212	0.099127605	0.001943416	-13.86895521
M8286	3D	9312378	0.10840907	0.360824742	99	0.072323212	0.099126527	0.03332711	-25.52276669
M5506	2D	77635178	0.108452362	0.412371134	99	0.072323212	0.09911986	0.073325815	14.08101912
M6715	3A	579047670	0.108460945	0.381443299	99	0.072323212	0.099118539	0.002791161	-12.11084897
M5526	2D	66312323	0.108494641	0.340206186	99	0.072323212	0.099113353	0.00217077	-13.95337935
M5206	2B	645824764	0.108765373	0.288659794	99	0.072323212	0.099071749	0.002557849	-12.19748558
M1877	1B	481501570	0.108884405	0.432989691	99	0.072323212	0.099053494	0.01013325	-16.91011367
M8261	3D	6060550	0.109039806	0.350515464	99	0.072323212	0.099029695	0.001121436	-12.73087346
M12395	6A	33007883	0.109161825	0.309278351	99	0.072323212	0.099011035	0.00123076	-13.60432219
M14250	7A	0	0.109179048	0.298969072	99	0.072323212	0.099008403	0.003047786	-12.01555563
M14290	7A	691821399	0.109230506	0.113402062	99	0.072323212	0.099000542	0.079575621	16.40178059
M10235	5A	464081131	0.109275568	0.432989691	99	0.072323212	0.098993661	0.008010182	-10.17285224
M11007	5B	488902270	0.109556367	0.350515464	99	0.072323212	0.098950856	0.099193424	23.68652491
M6746	3A	716253361	0.109681656	0.113402062	99	0.072323212	0.098931797	0.004111579	-14.67406617
M12002	5D	554401631	0.109734822	0.164948454	99	0.072323212	0.098923717	0.002363028	-14.02477121
M15047	7A	714340795	0.109739192	0.360824742	99	0.072323212	0.098923053	0.027922669	-23.51591773
M3251	2A	759751315	0.109832724	0.412371134	99	0.072323212	0.098908848	0.072471621	13.76382851
M4548	2B	37117645	0.109847774	0.226804124	99	0.072323212	0.098906564	0.001497195	-12.59134147
M928	1B	198637739	0.109849734	0.020618557	99	0.072323212	0.098906267	0.12107781	31.81292683
M323	1A	477699706	0.109854528	0.06185567	99	0.072323212	0.098905539	0.087597685	19.3806404
M5794	2D	575366522	0.109908047	0.206185567	99	0.072323212	0.098897419	0.066857276	11.67903528
M635	1A	578785363	0.10992312	0.432989691	99	0.072323212	0.098895133	0.005955652	-10.93576793
M13516	6B	643863927	0.109944027	0.041237113	99	0.072323212	0.098891963	0.104637871	25.7082295
M10515	5A	684647811	0.110040475	0.206185567	99	0.072323212	0.098877347	0.000947414	-12.7954935
M12433	6A	61874990	0.110044811	0.082474227	99	0.072323212	0.09887669	0.02136916	-21.08238124
M1287	1B	462987278	0.110056198	0.350515464	99	0.072323212	0.098874965	0.049268599	-31.44237306
M6818	3A	728057245	0.110059157	0.092783505	99	0.072323212	0.098874517	0.076900607	15.40845878
M836	1B	19772673	0.110103004	0.463917526	99	0.072323212	0.098867878	0.064470778	10.79284901
M3694	2B	68579934	0.110161851	0.453608247	99	0.072323212	0.098858973	0.062862395	10.19560285
M13377	6B	359069615	0.110331116	0.381443299	99	0.072323212	0.098833387	0.002157915	-13.94860568
M5628	2D	593032041	0.110361883	0.113402062	99	0.072323212	0.098828742	0.0084645	-16.29045117
M8003	3B	0	0.110404217	0.381443299	99	0.072323212	0.098822351	0.09568453	22.38355539
M8017	3B	771630784	0.110404217	0.381443299	99	0.072323212	0.098822351	0.09568453	22.38355539
M8046	3B	355244568	0.110404217	0.381443299	99	0.072323212	0.098822351	0.09568453	22.38355539
M8085	3B	796453795	0.110404217	0.381443299	99	0.072323212	0.098822351	0.09568453	22.38355539
M8087	3B	0	0.110404217	0.381443299	99	0.072323212	0.098822351	0.024873219	-22.38355539
M6517	3A	640766125	0.110429554	0.463917526	99	0.072323212	0.098818528	0.011689444	-17.48798011
M2665	2A	120722528	0.110470476	0.371134021	99	0.072323212	0.098812355	0.001856377	-13.83663465
M1228	1B	445449025	0.110543038	0.237113402	99	0.072323212	0.098801416	0.006110006	-15.41614885
M4442	2B	640489568	0.110564965	0.371134021	99	0.072323212	0.098798112	0.095911683	22.46790485
M6740	3A	714415122	0.110607173	0.12371134	99	0.072323212	0.098791754	0.006183825	-15.44356051
M6164	3A	403940047	0.110693061	0.237113402	99	0.072323212	0.098778824	0.002863713	-12.08390803
M7274	3B	49148259	0.110773971	0.257731959	99	0.072323212	0.098766654	0.065175301	11.0544617
M1580	1B	424743133	0.110846857	0.206185567	99	0.072323212	0.0987557	0.003929042	-11.68831569
M4813	2B	602108234	0.110908534	0.484536082	99	0.072323212	0.098746436	0.001102997	-13.55687939
M113	1A	12427365	0.110953975	0.237113402	99	0.072323212	0.098739615	0.067492256	11.91482438
M126	1A	13728679	0.11096979	0.453608247	99	0.072323212	0.098737242	0.000720377	-13.41479991
M6829	3A	70178225	0.111048601	0.340206186	99	0.072323212	0.09872542	0.032031682	-25.0417311
M10682	5B	56912565	0.111076843	0.309278351	99	0.072323212	0.098721186	0.00485212	-11.34554616
M4121	2B	305658684	0.111191714	0.463917526	99	0.072323212	0.098703978	0.001397705	-13.66631432
M1257	1B	390280239	0.111232102	0.371134021	99	0.072323212	0.098697932	0.02874299	-23.82053024
M6891	3B	7791132	0.111302146	0.412371134	99	0.072323212	0.098687453	0.000796124	-12.85167256
M11671	5B	617684309	0.111310905	0.309278351	99	0.072323212	0.098686143	0.08768496	19.4130485
M14436	7A	34520428	0.111311202	0.463917526	99	0.072323212	0.098686099	0.078484887	15.99675457
M10858	5B	43702204	0.111382719	0.154639175	99	0.072323212	0.098675408	0.000830728	-13.45577697
M4156	2B	107028709	0.111408019	0.257731959	99	0.072323212	0.098671628	0.00267565	-12.15374181
M1904	1B	680160129	0.11148204	0.288659794	99	0.072323212	0.098660573	0.005399458	-11.14230112
M15228	7B	566343875	0.111759099	0.298969072	99	0.072323212	0.09861927	0.070387466	12.98991228
M5113	2B	622858890	0.111848694	0.278350515	99	0.072323212	0.098605938	0.002296649	-12.29447784
M13920	6D	12435844	0.111879121	0.309278351	99	0.072323212	0.098601413	0.06819771	12.17678312
M1857	1B	574479431	0.11204611	0.484536082	99	0.072323212	0.098576604	0.001255212	-13.61340199
M14339	7A	0	0.112098237	0.494845361	99	0.072323212	0.098568868	0.071872789	13.54146224
M6672	3A	703907526	0.11221223	0.381443299	99	0.072323212	0.098551965	0.007526359	-10.35251188
M6759	3A	585937578	0.11222607	0.072164948	99	0.072323212	0.098549914	0.013320585	-18.09367708
M8478	3D	132061276	0.112240373	0.030927835	99	0.072323212	0.098547794	0.103184807	25.1686584
M13287	6B	230607608	0.112290529	0.432989691	99	0.072323212	0.098540365	0.003230126	-11.94784669
M9993	5A	110379087	0.112311348	0.381443299	99	0.072323212	0.098537283	0.069885886	12.80365906
M8447	3D	537339977	0.112326533	0.402061856	99	0.072323212	0.098535035	0.063367612	10.38320656
M4795	2B	732056365	0.112349781	0.340206186	99	0.072323212	0.098531594	0.089526365	20.09682337
M11536	5B	571473581	0.112374497	0.309278351	99	0.072323212	0.098527936	0.004714473	-11.39665907
M10180	5A	496609102	0.112399774	0.06185567	99	0.072323212	0.098524197	0.08663577	19.02344909
M3794	2B	96381383	0.112429184	0.484536082	99	0.072323212	0.098519847	0.005925345	-15.34757824
M8005	3B	0	0.112530225	0.072164948	99	0.072323212	0.098504913	0.083074931	17.70119112
M12449	6A	431192916	0.112656779	0.391752577	99	0.072323212	0.098486229	0.101053631	24.37728177
M9472	4B	26933807	0.112810207	0.175257732	99	0.072323212	0.098463608	0.069097666	12.51096681
M3911	2B	63622881	0.112811384	0.360824742	99	0.072323212	0.098463435	0.080279814	16.66327083
M8658	4A	245009236	0.112953658	0.154639175	99	0.072323212	0.09844249	0.070205687	12.92241168
M13306	6B	346802293	0.112953785	0.134020619	99	0.072323212	0.098442472	0.002402794	-14.03953745
M8529	4A	11986460	0.112965407	0.484536082	99	0.072323212	0.098440762	0.007173975	-15.81123606
M10678	5B	37979682	0.113124226	0.432989691	99	0.072323212	0.098417419	0.008715705	-9.91086839
M726	1B	3164636	0.113416676	0.195876289	99	0.072323212	0.098374531	0.070812283	13.14766106
M2380	2A	5973684	0.113553838	0.340206186	99	0.072323212	0.098354459	0.003429183	-11.87392988
M15244	7B	60863434	0.1136332	0.371134021	99	0.072323212	0.098342858	0.065770728	11.27556348
M894	1B	178656968	0.11367887	0.443298969	99	0.072323212	0.098336186	0.00076283	-12.86403563
M14273	7A	12800907	0.113703086	0.278350515	99	0.072323212	0.098332649	0.063720159	10.51411903
M13659	6B	705491433	0.113959431	0.237113402	99	0.072323212	0.098295264	0.005790623	-15.29755134
M15469	7B	597251943	0.113980014	0.319587629	99	0.072323212	0.098292266	0.005740133	-15.27880287
M5356	2B	791958920	0.114017632	0.103092784	99	0.072323212	0.098286789	0.015020877	-18.72505233
M8519	3D	0	0.114080171	0.340206186	99	0.072323212	0.098277687	0.032508463	-25.2187761
M4673	2B	579763053	0.114085669	0.371134021	99	0.072323212	0.098276888	0.002155968	-12.34671713
M6232	3A	305876520	0.114180259	0.319587629	99	0.072323212	0.098263133	0.034023197	-25.78124716
M3562	2B	419250206	0.114191151	0.319587629	99	0.072323212	0.09826155	0.071459321	13.38792803
M5839	2D	571920602	0.114208773	0.474226804	99	0.072323212	0.09825899	0.00298334	-14.25511349
M1821	1B	658439447	0.114254687	0.371134021	99	0.072323212	0.09825232	0.062649879	10.11668826
M13371	6B	206564330	0.11432482	0.474226804	99	0.072323212	0.098242137	0.002654787	-14.13311089
M1464	1B	557465111	0.114553477	0.237113402	99	0.072323212	0.098208988	0.066263371	11.45849827
M1707	1B	580578970	0.114553707	0.24742268	99	0.072323212	0.098208955	0.00551087	-11.10093033
M738	1B	0	0.114663572	0.072164948	99	0.072323212	0.098193054	0.088847033	19.8445649
M1281	1B	442620108	0.114702289	0.226804124	99	0.072323212	0.098187454	0.07456147	14.53985911
M6460	3A	564759853	0.114704232	0.350515464	99	0.072323212	0.098187173	0.002172496	-13.95402033
M1367	1B	392431722	0.114724593	0.494845361	99	0.072323212	0.098184229	0.006635944	-15.61144731
M11642	5B	486192860	0.114806227	0.463917526	99	0.072323212	0.098172432	0.003934466	-14.60829842
M13397	6B	399220352	0.114850522	0.474226804	99	0.072323212	0.098166035	0.000221957	-13.06488001
M1548	1B	0	0.114988518	0.06185567	99	0.072323212	0.098146123	0.013587726	-18.1928757
M13130	6B	55579051	0.115074727	0.350515464	99	0.072323212	0.098133697	0.02830181	-23.65670534
M5342	2B	762160772	0.115113777	0.06185567	99	0.072323212	0.098128072	0.022462842	-21.4885021
M7259	3B	47019723	0.115208288	0.474226804	99	0.072323212	0.098114467	0.009431453	-9.645087109
M14419	7A	34920067	0.115293718	0.474226804	99	0.072323212	0.098102179	0.005167785	-15.06627081
M7880	3B	0	0.115420198	0.082474227	99	0.072323212	0.098084006	0.011422409	-17.38882106
M5327	2B	643640677	0.115429168	0.257731959	99	0.072323212	0.098082718	0.00226648	-13.98891959
M1982	1D	305817	0.115484559	0.298969072	99	0.072323212	0.098074768	0.001794956	-13.81382699
M3810	2B	104940392	0.11555871	0.453608247	99	0.072323212	0.09806413	0.013106393	-18.01414062
M5484	2D	73820037	0.115575824	0.030927835	99	0.072323212	0.098061676	0.103282728	25.20501965
M2381	2A	19836679	0.115615907	0.422680412	99	0.072323212	0.098055931	0.006028209	-15.38577488
M5010	2B	752394623	0.115684463	0.24742268	99	0.072323212	0.098046108	0.065751933	11.26858434
M8533	4A	17017869	0.115701433	0.092783505	99	0.072323212	0.098043678	0.08002712	16.56943729
M14441	7A	36312068	0.116043876	0.484536082	99	0.072323212	0.097994721	0.072367345	13.72510742
M6567	3A	658048755	0.116144214	0.144329897	99	0.072323212	0.097980407	0.004737937	-14.90665411
M2706	2A	417084357	0.116296194	0.463917526	99	0.072323212	0.097958752	0.090734875	20.54558356
M3649	2B	46670271	0.116456913	0.453608247	99	0.072323212	0.097935886	0.077975595	15.80763763
M8801	4A	603746204	0.116497125	0.216494845	99	0.072323212	0.097930171	0.067511251	11.92187782
M7488	3B	518153058	0.116514583	0.103092784	99	0.072323212	0.09792769	0.074413197	14.48480042
M8106	3B	0	0.116516386	0.092783505	99	0.072323212	0.097927434	0.078005492	15.81873939
M6136	3A	455701026	0.116532521	0.381443299	99	0.072323212	0.097925142	0.072490808	13.77095348
M240	1A	232787828	0.116586859	0.298969072	99	0.072323212	0.097917425	0.004855244	-11.34438597
M10051	5A	473980796	0.116589485	0.432989691	99	0.072323212	0.097917052	0.012865412	-17.92465614
M10552	5B	713387538	0.116604397	0.195876289	99	0.072323212	0.097914935	0.003826692	-14.56827819
M9330	4A	731504837	0.116607277	0.206185567	99	0.072323212	0.097914526	0.002367792	-12.26805975
M3938	2B	652870583	0.116618405	0.412371134	99	0.072323212	0.097912946	0.013204788	-18.05067811
M11440	5B	1207618	0.116624749	0.422680412	99	0.072323212	0.097912046	0.074942262	14.68125981
M5988	2D	786225684	0.116791036	0.164948454	99	0.072323212	0.097888464	0.003120831	-11.98843157
M3813	2B	99767221	0.116838105	0.391752577	99	0.072323212	0.097881795	0.003236727	-11.94539541
M758	1B	2358221	0.116878949	0.288659794	99	0.072323212	0.097876011	0.071096056	13.2530354
M6504	3A	627917165	0.116899506	0.268041237	99	0.072323212	0.097873101	0.002713646	-12.13963267
M3737	2B	44609696	0.117000303	0.010309278	99	0.072323212	0.097858839	0.150912702	42.89161657
M5107	2B	0	0.117000303	0.010309278	99	0.072323212	0.097858839	0.080101391	-42.89161657
M13184	6B	116136635	0.117034822	0.432989691	99	0.072323212	0.097853958	0.072021461	13.59666937
M15167	7B	5055043	0.117190502	0.422680412	99	0.072323212	0.097831966	0.001544212	-12.57388259
M7774	3B	727794861	0.117204128	0.134020619	99	0.072323212	0.097830043	0.001925256	-13.86221175
M9082	4A	691718505	0.117318355	0.175257732	99	0.072323212	0.097813929	0.070930381	13.1915147
M9304	4A	10150766	0.117392783	0.381443299	99	0.072323212	0.097803439	0.067979094	12.09560341
M11024	5B	494739791	0.117396103	0.18556701	99	0.072323212	0.097802972	0.003430121	-14.42101816
M6872	3A	741359064	0.117470573	0.432989691	99	0.072323212	0.097792483	0.078670608	16.06571895
M12780	6A	610294735	0.117499884	0.18556701	99	0.072323212	0.097788358	0.001842126	-12.46325734
M1288	1B	462987278	0.117565247	0.072164948	99	0.072323212	0.097779161	0.012526133	-17.7986706
M10873	5B	431870071	0.117690156	0.298969072	99	0.072323212	0.097761602	0.002955689	-12.04975423
M12151	6A	62668951	0.117713827	0.391752577	99	0.072323212	0.097758277	0.021127206	-20.99253592
M8862	4A	690323784	0.117818254	0.18556701	99	0.072323212	0.097743617	0.066843064	11.67375765
M9220	4A	410117142	0.11783856	0.453608247	99	0.072323212	0.097740768	0.064219369	10.69949241
M2728	2A	493808292	0.117867932	0.329896907	99	0.072323212	0.097736648	0.000218838	-13.22856174
M5069	2B	766233155	0.117874213	0.020618557	99	0.072323212	0.097735767	0.046077563	-30.2574349
M156	1A	25126301	0.11790574	0.474226804	99	0.072323212	0.097731346	0.066182185	11.42835122
M246	1A	293594276	0.11794111	0.020618557	99	0.072323212	0.097726388	0.120448084	31.57908868
M4902	2B	751843230	0.11794111	0.020618557	99	0.072323212	0.097726388	0.120448084	31.57908868
M7621	3B	580521251	0.11794111	0.020618557	99	0.072323212	0.097726388	0.120448084	31.57908868
M15015	7A	713138041	0.11794111	0.020618557	99	0.072323212	0.097726388	0.049636774	-31.57908868
M9906	5A	34323774	0.11794111	0.020618557	99	0.072323212	0.097726388	0.049636774	-31.57908868
M14452	7A	609726833	0.118092729	0.360824742	99	0.072323212	0.097705153	0.074246649	14.42295579
M3767	2B	94165247	0.118102567	0.329896907	99	0.072323212	0.097703776	0.025338213	-22.55622299
M1081	1B	85287651	0.118129997	0.175257732	99	0.072323212	0.097699938	0.00347493	-14.43765739
M12761	6A	595578856	0.118163159	0.494845361	99	0.072323212	0.0976953	0.072043914	13.6050067
M7281	3B	48788274	0.11818352	0.340206186	99	0.072323212	0.097692452	0.069488984	12.65627616
M1890	1B	673741635	0.118361507	0.175257732	99	0.072323212	0.097667585	0.00473009	-14.90373995
M15446	7B	541509916	0.118469365	0.06185567	99	0.072323212	0.097652537	0.08414748	18.09946422
M1782	1B	644598781	0.118752232	0.226804124	99	0.072323212	0.097613143	0.06488908	10.94817833
M5133	2B	779248164	0.11882983	0.381443299	99	0.072323212	0.097602355	0.012663036	-17.84950724
M937	1B	0	0.119022838	0.144329897	99	0.072323212	0.097575556	0.008236215	-16.20568108
M15486	7B	600720209	0.119065231	0.268041237	99	0.072323212	0.097569676	0.068431518	12.26360369
M751	1B	12605308	0.119127521	0.463917526	99	0.072323212	0.097561041	0.005498349	-15.18902034
M15033	7A	0	0.119152579	0.412371134	99	0.072323212	0.097557568	0.078426985	15.97525378
M5175	2B	0	0.119317297	0.484536082	99	0.072323212	0.097534764	0.006713627	-10.65430668
M987	1B	577431009	0.119407691	0.195876289	99	0.072323212	0.097522264	0.003253395	-11.93920584
M13169	6B	85384559	0.119445791	0.340206186	99	0.072323212	0.097516999	0.0076832	-10.29427158
M4983	2B	763473937	0.119639154	0.298969072	99	0.072323212	0.097490306	0.00790063	-16.08106716
M185	1A	41919589	0.119682688	0.288659794	99	0.072323212	0.097484303	0.003660181	-14.50644723
M9122	4A	701045149	0.119707112	0.082474227	99	0.072323212	0.097480936	0.081721265	17.19852984
M7067	3B	15205844	0.119748544	0.041237113	99	0.072323212	0.097475226	0.104221535	25.55363011
M943	1B	63461211	0.119748544	0.041237113	99	0.072323212	0.097475226	0.033410225	-25.55363011
M14314	7A	18681090	0.119958236	0.371134021	99	0.072323212	0.097446364	0.079292751	16.29674138
M3	1A	6341226	0.120015217	0.298969072	99	0.072323212	0.097438531	0.005717161	-11.02432761
M15473	7B	566408634	0.120033898	0.278350515	99	0.072323212	0.097435963	0.069220793	12.55668779
M9302	4A	0	0.120200097	0.402061856	99	0.072323212	0.097413144	0.008768715	-9.891183978
M13091	6B	20590924	0.120200439	0.474226804	99	0.072323212	0.097413097	0.003657843	-14.50557894
M2774	2A	185126350	0.120226998	0.134020619	99	0.072323212	0.097409453	0.031145461	-24.71264792
M995	1B	344338837	0.120383788	0.319587629	99	0.072323212	0.097387963	0.001967761	-12.41660463
M11567	5B	576916243	0.120495092	0.463917526	99	0.072323212	0.097372727	0.074860239	14.65080207
M8031	3B	776544907	0.120583989	0.371134021	99	0.072323212	0.097360569	0.026500989	-22.98800053
M8362	3D	58370125	0.120688965	0.391752577	99	0.072323212	0.097346225	0.00797535	-10.18578667
M797	1B	247051054	0.12080882	0.391752577	99	0.072323212	0.097329866	0.086879234	19.11385563
M6801	3A	729897788	0.1208112	0.12371134	99	0.072323212	0.097329541	0.001334402	-13.64280794
M1613	1B	594764202	0.120861365	0.484536082	99	0.072323212	0.097322699	0.071857246	13.53569054
M1483	1B	554232742	0.120902084	0.360824742	99	0.072323212	0.097317148	0.036622597	-26.74649091
M9853	5A	16199701	0.120979153	0.206185567	99	0.072323212	0.097306647	0.069608506	12.70065849
M3025	2A	721105596	0.121009225	0.319587629	99	0.072323212	0.097302552	0.005937761	-10.94241158
M4560	2B	0	0.121029977	0.051546392	99	0.072323212	0.097299726	0.091151317	20.70022247
M12483	6A	241374244	0.121069743	0.453608247	99	0.072323212	0.097294314	0.077825874	15.75204104
M11795	5B	625779199	0.121095242	0.051546392	99	0.072323212	0.097290844	0.090379892	20.41376656
M9203	4A	716265884	0.12119791	0.298969072	99	0.072323212	0.097276882	0.07248624	13.76925728
M1263	1B	418051065	0.121338117	0.350515464	99	0.072323212	0.097257837	0.000748878	-13.42538343
M712	1B	2496086	0.121397387	0.453608247	99	0.072323212	0.097249793	0.074863401	14.65197609
M3808	3B	0	0.121410056	0.391752577	99	0.072323212	0.097248074	0.08983682	20.2121059
M7227	3B	38809070	0.121410056	0.391752577	99	0.072323212	0.097248074	0.01902551	-20.2121059
M1628	1B	144111278	0.121607146	0.494845361	99	0.072323212	0.097221361	0.000444459	-13.31234241
M4536	2B	671040940	0.121626133	0.195876289	99	0.072323212	0.09721879	0.067130303	11.78041928
M314	1A	562808063	0.12170423	0.381443299	99	0.072323212	0.097208221	0.069585889	12.69226027
M14298	7A	15997601	0.121832695	0.092783505	99	0.072323212	0.097190851	0.011149028	-17.28730588
M14028	6D	376894633	0.121859767	0.484536082	99	0.072323212	0.097187193	0.071393664	13.36354712
M1309	1B	462799871	0.121896375	0.103092784	99	0.072323212	0.097182249	0.010715212	-17.12621551
M5039	2B	767024523	0.121905343	0.350515464	99	0.072323212	0.097181038	0.007505616	-10.36021455
M3531	2B	9887842	0.121962896	0.360824742	99	0.072323212	0.097173268	0.069419536	12.63048781
M8904	4A	674340235	0.12201441	0.463917526	99	0.072323212	0.097166317	0.068668123	12.35146313
M5539	2D	406151871	0.122036243	0.041237113	99	0.072323212	0.097163372	0.096801713	22.79840287
M12907	6A	615640353	0.122047689	0.432989691	99	0.072323212	0.097161828	0.066872909	11.68484005
M3356	2A	764231381	0.122082841	0.226804124	99	0.072323212	0.097157088	0.000990491	-12.7794976
M3125	2A	751096174	0.122103822	0.453608247	99	0.072323212	0.09715426	0.077628388	15.67870818
M5525	2D	66312323	0.122137434	0.391752577	99	0.072323212	0.09714973	3.69E-05	-13.13360443
M6739	3A	714415122	0.122138979	0.432989691	99	0.072323212	0.097149521	0.004931926	-14.97868863
M8052	3B	589410123	0.122324541	0.041237113	99	0.072323212	0.097124539	0.097551675	23.07688855
M8079	3B	793102915	0.122792844	0.072164948	99	0.072323212	0.097061679	0.081267249	17.02993849
M795	1B	30846941	0.122819298	0.402061856	99	0.072323212	0.097058136	0.073565911	14.17017479
M12043	6A	1033153	0.122846966	0.494845361	99	0.072323212	0.097054432	0.070243215	12.93634704
M8619	4A	107154792	0.122855589	0.412371134	99	0.072323212	0.097053277	0.071823875	13.52329894
M634	1A	481012178	0.12307667	0.422680412	99	0.072323212	0.097023713	0.063404459	10.39688901
M8815	4A	0	0.123143679	0.072164948	99	0.072323212	0.097014763	0.010613379	-17.0884015
M9169	4A	709851770	0.123215129	0.24742268	99	0.072323212	0.097005227	0.004296557	-11.55184518
M2067	1D	52680610	0.123279099	0.175257732	99	0.072323212	0.096996695	0.023589496	-21.9068662
M12396	6A	33007883	0.123366367	0.360824742	99	0.072323212	0.096985062	0.000171707	-13.08353963
M857	1B	36034202	0.123368679	0.381443299	99	0.072323212	0.096984754	0.099026139	23.62440618
M500	1A	540414573	0.123449484	0.381443299	99	0.072323212	0.096973992	0.075794727	14.99780848
M124	1A	15325325	0.123475551	0.206185567	99	0.072323212	0.096970522	0.06550103	11.17541594
M8554	4A	6919003	0.123553673	0.494845361	99	0.072323212	0.096960127	0.008263191	-10.07890158
M1029	1B	206100463	0.123696164	0.092783505	99	0.072323212	0.096941187	0.080713882	16.82445501
M1096	1B	342391060	0.123712206	0.154639175	99	0.072323212	0.096939056	0.072256932	13.68410744
M9234	4A	346700291	0.123745851	0.195876289	99	0.072323212	0.096934588	0.003644582	-11.79394532
M14090	6D	460856196	0.123746481	0.350515464	99	0.072323212	0.096934504	0.024670345	-22.30822155
M4617	2B	316009740	0.123885706	0.113402062	99	0.072323212	0.09691603	0.003347869	-14.39047554
M2078	1D	41868233	0.124004343	0.402061856	99	0.072323212	0.096900306	0.000287888	-13.25420232
M8244	3D	0	0.12405141	0.144329897	99	0.072323212	0.096894073	0.006726282	-15.64499256
M7664	3B	581550904	0.124092862	0.391752577	99	0.072323212	0.096888585	0.066431627	11.52097751
M4230	2B	219214772	0.124322532	0.020618557	99	0.072323212	0.096858218	0.04716081	-30.65968086
M4183	2B	630135956	0.124367441	0.350515464	99	0.072323212	0.096852287	0.078506879	16.00492117
M13755	6B	0	0.12439247	0.309278351	99	0.072323212	0.096848983	0.021188209	-21.01518842
M8913	4A	330012453	0.124500854	0.144329897	99	0.072323212	0.096834683	0.07663289	15.30904653
M10958	5B	581344245	0.124614661	0.06185567	99	0.072323212	0.096819683	0.086508549	18.97620796
M3588	2B	25050436	0.124624348	0.453608247	99	0.072323212	0.096818407	0.061885415	9.832817565
M6899	3B	665978534	0.124656612	0.103092784	99	0.072323212	0.096814158	0.008486906	-16.29877099
M11166	5B	519005204	0.124662357	0.103092784	99	0.072323212	0.096813401	0.082396395	17.44922811
M5218	2B	0	0.124693887	0.371134021	99	0.072323212	0.09680925	0.008230738	-10.09095247
M10568	5B	11773089	0.124841997	0.474226804	99	0.072323212	0.096789766	0.004873065	-14.95683145
M4888	2B	562440272	0.124859278	0.432989691	99	0.072323212	0.096787494	0.005252156	-11.19699943
M397	1A	508571642	0.124906785	0.463917526	99	0.072323212	0.096781251	0.065316905	11.10704402
M7292	3B	557949309	0.125055701	0.041237113	99	0.072323212	0.096761698	0.096574198	22.71391877
M7290	3B	51225085	0.125055701	0.041237113	99	0.072323212	0.096761698	0.025762887	-22.71391877
M9227	4A	731340115	0.125080857	0.381443299	99	0.072323212	0.096758398	0.06871105	12.36740322
M3353	2A	766445675	0.125090561	0.350515464	99	0.072323212	0.096757125	0.053276695	-32.9307126
M3887	2B	0	0.125090561	0.350515464	99	0.072323212	0.096757125	0.053276695	-32.9307126
M8354	3D	42679365	0.125094995	0.329896907	99	0.072323212	0.096756543	0.118287591	30.77682539
M1898	1B	674933891	0.125133303	0.443298969	99	0.072323212	0.09675152	0.067627621	11.96508979
M4624	2B	398976460	0.125205441	0.154639175	99	0.072323212	0.096742064	0.075611467	14.92975817
M5684	2D	0	0.125231003	0.381443299	99	0.072323212	0.096738715	0.006204779	-10.84325861
M3232	2A	758950183	0.125394741	0.237113402	99	0.072323212	0.09671728	0.003196892	-11.96018729
M7999	3B	747699970	0.125408793	0.350515464	99	0.072323212	0.096715442	0.00158073	-12.56032234
M1886	1B	480971976	0.125590159	0.144329897	99	0.072323212	0.09669174	0.073306316	14.07377853
M8304	3D	17645869	0.125592798	0.443298969	99	0.072323212	0.096691396	0.007033434	-15.75904836
M3166	2A	759821777	0.125650165	0.340206186	99	0.072323212	0.096683907	0.066752604	11.6401669
M12460	6A	98753506	0.125695702	0.402061856	99	0.072323212	0.096677965	0.095319582	22.24803816
M12443	6A	67125239	0.125695702	0.402061856	99	0.072323212	0.096677965	0.024508272	-22.24803816
M12451	6A	98982876	0.125695702	0.402061856	99	0.072323212	0.096677965	0.024508272	-22.24803816
M12462	6A	106663978	0.125695702	0.402061856	99	0.072323212	0.096677965	0.024508272	-22.24803816
M12495	6A	317631893	0.125695702	0.402061856	99	0.072323212	0.096677965	0.024508272	-22.24803816
M4730	2B	726768764	0.125729261	0.422680412	99	0.072323212	0.096673587	0.007532059	-15.94420452
M2050	1D	42037018	0.125746803	0.329896907	99	0.072323212	0.0966713	0.069831102	12.78331598
M5437	2D	607996993	0.12589884	0.453608247	99	0.072323212	0.096651488	0.00181642	-12.47280269
M15281	7B	127607725	0.125944887	0.350515464	99	0.072323212	0.096645493	0.000396448	-13.29451434
M2749	2A	561848369	0.126121404	0.432989691	99	0.072323212	0.096622535	0.001907369	-13.85556987
M7519	3B	391861154	0.126251927	0.484536082	99	0.072323212	0.096605582	0.00154431	-12.57384606
M6718	3A	714450654	0.12630816	0.371134021	99	0.072323212	0.096598284	0.003044991	-12.01659343
M6634	3A	292579611	0.126359283	0.474226804	99	0.072323212	0.096591653	0.072632378	13.82352303
M14246	7A	600721014	0.126416313	0.257731959	99	0.072323212	0.096584259	0.069834879	12.78471856
M8287	3D	9312378	0.126425547	0.226804124	99	0.072323212	0.096583062	0.07411237	14.37309332
M8254	3D	16234201	0.126425547	0.226804124	99	0.072323212	0.096583062	0.003301059	-14.37309332
M9794	4D	403180673	0.126427283	0.278350515	99	0.072323212	0.096582837	0.069784768	12.76611054
M4636	2B	680082816	0.126467649	0.391752577	99	0.072323212	0.096577606	0.006102573	-10.88121115
M14696	7A	495536921	0.126491468	0.319587629	99	0.072323212	0.096574521	0.007049873	-10.52944713
M702	1B	3572450	0.126598224	0.319587629	99	0.072323212	0.096560699	0.003297205	-11.9229378
M12858	6A	92320684	0.126694357	0.175257732	99	0.072323212	0.096548264	0.087962134	19.51597236
M11152	5B	519254488	0.12670418	0.319587629	99	0.072323212	0.096546994	0.072135896	13.63916267
M8627	4A	428572127	0.126704185	0.453608247	99	0.072323212	0.096546993	0.002698352	-12.14531204
M8203	3B	317056611	0.126750223	0.278350515	99	0.072323212	0.096541043	0.003234159	-11.94634908
M6626	3A	547633302	0.126797468	0.340206186	99	0.072323212	0.096534938	0.004182056	-14.70023674
M11258	5B	57635475	0.126813482	0.278350515	99	0.072323212	0.09653287	0.00089742	-12.81405818
M4567	2B	545270114	0.126926038	0.453608247	99	0.072323212	0.096518339	0.064284547	10.72369502
M685	1A	370054619	0.126934669	0.494845361	99	0.072323212	0.096517226	0.074738939	14.60575932
M9311	4A	0	0.12705661	0.309278351	99	0.072323212	0.096501502	0.071753233	13.49706712
M15238	7B	103401376	0.127159082	0.350515464	99	0.072323212	0.096488301	0.068798903	12.4000259
M11359	5B	146891824	0.127178377	0.041237113	99	0.072323212	0.096485817	0.025111653	-22.472094
M5808	2D	601970973	0.12721507	0.072164948	99	0.072323212	0.096481093	0.022939678	-21.66556718
M14928	7A	700509978	0.127215512	0.113402062	99	0.072323212	0.096481037	0.014002172	-18.34677335
M2921	2A	16885170	0.127236323	0.371134021	99	0.072323212	0.096478359	0.068952518	12.45706831
M1020	1B	170576130	0.12732851	0.268041237	99	0.072323212	0.096466501	0.002713519	-14.1549199
M1913	1B	676179014	0.127397179	0.412371134	99	0.072323212	0.096457675	0.000772492	-12.86044795
M3676	2B	6409896	0.127497064	0.484536082	99	0.072323212	0.096444847	0.062448556	10.0419303
M11133	5B	0	0.127572408	0.319587629	99	0.072323212	0.096435177	0.006172327	-10.8553094
M14506	7A	55923161	0.127582684	0.278350515	99	0.072323212	0.096433859	0.068092435	12.13769103
M13167	6B	89695899	0.127718396	0.463917526	99	0.072323212	0.09641646	0.009713227	-9.540455117
M1262	1B	316600988	0.127726823	0.463917526	99	0.072323212	0.096415381	0.081502004	17.11711075
M11190	5B	425653407	0.127804241	0.350515464	99	0.072323212	0.096405466	0.088587965	19.74836452
M7612	3B	566830700	0.127825895	0.206185567	99	0.072323212	0.096402693	0.070949792	13.19872289
M3433	2B	17064831	0.127882977	0.412371134	99	0.072323212	0.096395389	0.000247659	-13.23926413
M219	1A	386245841	0.128172708	0.371134021	99	0.072323212	0.096358368	0.007278076	-10.44470769
M385	1A	197865491	0.128280518	0.443298969	99	0.072323212	0.096344617	0.063102873	10.28490026
M7084	3B	15205844	0.128375334	0.06185567	99	0.072323212	0.096332534	0.090945592	20.62382977
M7146	3B	24929087	0.128375334	0.06185567	99	0.072323212	0.096332534	0.020134281	-20.62382977
M13251	6B	128193460	0.128386773	0.422680412	99	0.072323212	0.096331076	0.065020159	10.99685243
M6823	3A	731113205	0.128576633	0.051546392	99	0.072323212	0.096306914	0.089680868	20.15419578
M10505	5A	681463909	0.128614691	0.391752577	99	0.072323212	0.096302075	0.065348424	11.11874829
M10467	5A	618274809	0.128686301	0.453608247	99	0.072323212	0.096292975	0.005632796	-11.05565522
M3097	2A	744286377	0.12872573	0.278350515	99	0.072323212	0.096287967	0.065281981	11.09407549
M5410	2D	20358088	0.128763326	0.237113402	99	0.072323212	0.096283193	0.067342902	11.8593642
M13026	6B	19336874	0.128793769	0.113402062	99	0.072323212	0.096279329	0.005200921	-15.07857524
M10903	5B	438017042	0.128843181	0.371134021	99	0.072323212	0.096273059	0.026467041	-22.9753945
M6270	3A	52210548	0.128980155	0.463917526	99	0.072323212	0.096255693	0.066456506	11.53021606
M14355	7A	23895123	0.129076887	0.412371134	99	0.072323212	0.096243441	0.080639809	16.79694924
M13004	6B	17701756	0.129103898	0.474226804	99	0.072323212	0.096240022	0.063304357	10.35971782
M8001	3B	0	0.129232167	0.041237113	99	0.072323212	0.096223796	0.096143109	22.55384101
M8014	3B	513332084	0.129232167	0.041237113	99	0.072323212	0.096223796	0.096143109	22.55384101
M8050	3B	12179959	0.129232167	0.041237113	99	0.072323212	0.096223796	0.025331798	-22.55384101
M688	1A	0	0.129320109	0.134020619	99	0.072323212	0.096212682	0.073946988	14.31168166
M14978	7A	824552561	0.129347129	0.154639175	99	0.072323212	0.096209269	0.073758041	14.24151907
M10138	5A	480099548	0.129365313	0.360824742	99	0.072323212	0.096206972	0.002739475	-12.13004179
M217	1A	793785940	0.129372658	0.494845361	99	0.072323212	0.096206045	0.006441802	-10.75524428
[truncated: 13,601 more rows]
