# Supplementary material for: Genome-wide association study of drought tolerance and biomass allocation in wheat
Source: PLoS One. 2019 Dec 4;14(12):e0225383. doi: 10.1371/journal.pone.0225383 (PMC6892492; doi:10.1371/journal.pone.0225383)
Supplement: S10 Table — (CSV) [file pone.0225383.s010.csv]

SNP	Chromosome	Position	P.value	maf	nobs	Rsquare.of.Model.without.SNP	Rsquare.of.Model.with.SNP	FDR_Adjusted_P-values	effect
M7970	3B	95564668	2.10E-05	0.453608247	99	0.117564881	0.31314725	0.049642223	24.82111143
M1378	1B	471174490	0.000139752	0.360824742	99	0.117564881	0.271104084	0.045470015	22.73500746
M4551	2B	565077064	0.000187327	0.268041237	99	0.117564881	0.264802027	0.059773025	34.88651227
M4196	2B	151482156	0.000427429	0.432989691	99	0.117564881	0.247339331	0.054775821	-37.38791051
M2116	1D	472550886	0.000435496	0.340206186	99	0.117564881	0.246948367	0.052266941	-26.13347072
M3560	2B	0	0.000600474	0.474226804	99	0.117564881	0.240266087	0.050060833	20.03041668
M15552	7B	670757369	0.000669135	0.432989691	99	0.117564881	0.238028566	0.056979999	-38.4899997
M7427	3B	303590858	0.000756131	0.18556701	99	0.117564881	0.23551148	0.042629332	-21.3146662
M8061	3B	785499330	0.001003132	0.144329897	99	0.117564881	0.229727172	0.048449919	-24.22495968
M12225	6A	17652529	0.001182784	0.340206186	99	0.117564881	0.226379896	0.0557072	-27.85359987
M14468	7A	60679438	0.001328426	0.278350515	99	0.117564881	0.224031209	0.051092567	30.54628332
M4676	2B	595508003	0.001352808	0.484536082	99	0.117564881	0.223664156	0.038421426	-19.21071293
M6620	3A	686200851	0.001373917	0.18556701	99	0.117564881	0.223351857	0.045909597	-22.95479827
M774	1B	89404769	0.001457271	0.237113402	99	0.117564881	0.222165292	0.05993606	-29.96802998
M7199	2B	157603272	0.001571787	0.12371134	99	0.117564881	0.220644745	0.051460586	25.73029308
M2096	1D	366012746	0.001592586	0.443298969	99	0.117564881	0.220380889	0.068146655	-34.07332731
M9282	4A	688382396	0.001759142	0.381443299	99	0.117564881	0.218388287	0.041642653	-20.82132656
M1421	1B	531867322	0.001891508	0.360824742	99	0.117564881	0.216939161	0.037247523	-18.62376159
M15517	7B	601776139	0.002026758	0.443298969	99	0.117564881	0.215562973	1	-31.95596416
M2509	2A	51108076	0.002072495	0.474226804	99	0.117564881	0.215119002	1	-20.67695616
M680	1A	590967815	0.002209912	0.072164948	99	0.117564881	0.213843655	1	-32.86132999
M2537	2A	0	0.002216705	0.463917526	99	0.117564881	0.213782751	1	-22.89304027
M10270	5A	434483981	0.002235407	0.164948454	99	0.117564881	0.213616082	1	-24.67913309
M1825	1B	0	0.002493911	0.329896907	99	0.117564881	0.211449666	1	21.11654589
M9734	4D	16502547	0.002610911	0.24742268	99	0.117564881	0.210544492	1	-28.79548036
M9427	4A	733792535	0.002972784	0.432989691	99	0.117564881	0.207989827	1	-18.41253748
M1317	1B	505491281	0.002996785	0.402061856	99	0.117564881	0.207831958	1	19.05191061
M9153	4A	708632121	0.003022046	0.226804124	99	0.117564881	0.207667203	1	20.40463182
M9920	5A	40170718	0.00303777	0.206185567	99	0.117564881	0.207565375	1	-18.47867932
M1723	1B	0	0.00306231	0.463917526	99	0.117564881	0.207407534	1	-19.79228098
M15397	7B	522729143	0.003078618	0.432989691	99	0.117564881	0.207303369	1	21.44877281
M15333	7B	254067422	0.003129416	0.391752577	99	0.117564881	0.206982518	1	27.74870093
M2287	1D	0	0.003418039	0.412371134	99	0.117564881	0.205256257	1	17.13284404
M3595	2B	506395762	0.003592271	0.412371134	99	0.117564881	0.204285874	1	21.11809549
M1476	1B	544133182	0.00363584	0.257731959	99	0.117564881	0.204050841	1	27.59763946
M4495	2B	555576973	0.00366813	0.340206186	99	0.117564881	0.203878532	1	19.8650241
M3942	2B	32805672	0.003857232	0.113402062	99	0.117564881	0.202899994	1	22.20711782
M12137	6A	231626622	0.003891204	0.226804124	99	0.117564881	0.202729488	1	23.08642675
M14235	7A	405822737	0.004056553	0.268041237	99	0.117564881	0.201921052	1	-17.71114134
M6323	3A	238337704	0.004081093	0.309278351	99	0.117564881	0.20180399	1	18.9458299
M3629	2B	47668010	0.004083039	0.453608247	99	0.117564881	0.20179474	1	-15.8427834
M9212	4A	9824444	0.004175129	0.103092784	99	0.117564881	0.201362088	1	-25.22024046
M2828	2A	412255299	0.004225553	0.371134021	99	0.117564881	0.201129367	1	18.43832737
M4552	2B	565077064	0.004265512	0.309278351	99	0.117564881	0.200946981	1	-28.85898738
M6954	3B	10562725	0.004304898	0.268041237	99	0.117564881	0.200768941	1	-20.87256978
M201	1A	52532558	0.00452433	0.360824742	99	0.117564881	0.199806985	1	-21.07852457
M1826	1B	0	0.004588732	0.360824742	99	0.117564881	0.19953384	1	-18.12656205
M3339	2A	766578300	0.004864147	0.319587629	99	0.117564881	0.198408991	1	28.87891704
M7106	3B	21863643	0.004888925	0.24742268	99	0.117564881	0.19831106	1	27.21878647
M3546	2B	824552561	0.00501276	0.237113402	99	0.117564881	0.197829205	1	21.51947124
M11078	5B	502152339	0.005025815	0.24742268	99	0.117564881	0.197779131	1	-24.01472143
M6632	3A	691041856	0.00507241	0.268041237	99	0.117564881	0.197601499	1	-17.14112266
M13742	6B	0	0.005149338	0.309278351	99	0.117564881	0.19731191	1	16.71397526
M5825	2D	588434693	0.005213863	0.24742268	99	0.117564881	0.197072459	1	20.95197587
M3562	2B	419250206	0.005436298	0.319587629	99	0.117564881	0.196269999	1	21.18097043
M10395	5A	577423494	0.005471126	0.309278351	99	0.117564881	0.196147451	1	-17.42030003
M10116	5A	357980231	0.005511652	0.494845361	99	0.117564881	0.196005871	1	17.6447422
M1249	1B	452770206	0.005518766	0.422680412	99	0.117564881	0.195981129	1	22.41150673
M6263	3A	387080506	0.005592178	0.278350515	99	0.117564881	0.195727735	1	18.4095328
M6619	3A	686200851	0.005609957	0.24742268	99	0.117564881	0.195666885	1	25.64794958
M892	1B	12505139	0.005613279	0.319587629	99	0.117564881	0.195655538	1	-38.94948695
M3968	2B	176172344	0.005689662	0.453608247	99	0.117564881	0.195396543	1	-23.11918733
M526	1A	549851141	0.00574473	0.371134021	99	0.117564881	0.195212053	1	-16.30744617
M4435	2B	620850327	0.005758854	0.24742268	99	0.117564881	0.195165033	1	-17.78137482
M10881	5B	0	0.005781873	0.422680412	99	0.117564881	0.195088653	1	-16.25201744
M12045	6A	2141663	0.006006236	0.402061856	99	0.117564881	0.194360351	1	-15.25288005
M13052	6B	26196316	0.006063795	0.195876289	99	0.117564881	0.19417807	1	18.13442061
M14718	7A	90552202	0.006174198	0.298969072	99	0.117564881	0.193833425	1	-16.76419269
M10253	5A	429304969	0.006417723	0.474226804	99	0.117564881	0.193095356	1	-20.34612056
M4171	2B	223152424	0.006522826	0.432989691	99	0.117564881	0.192785774	1	-23.01600155
M14389	7A	29550908	0.006712201	0.494845361	99	0.117564881	0.192240858	1	16.56619133
M8011	3B	533130365	0.007029485	0.134020619	99	0.117564881	0.191362817	1	21.84629516
M11081	5B	529496598	0.007066168	0.226804124	99	0.117564881	0.191263974	1	20.85847552
M14852	7A	676966338	0.007067015	0.195876289	99	0.117564881	0.191261697	1	17.748635
M4754	2B	600038125	0.007210253	0.360824742	99	0.117564881	0.190880839	1	-19.97892757
M3219	2A	0	0.007267504	0.103092784	99	0.117564881	0.190730812	1	25.43797295
M13640	6B	696194020	0.007293704	0.443298969	99	0.117564881	0.190662565	1	-15.36841328
M7294	3B	50790384	0.007365654	0.443298969	99	0.117564881	0.190476454	1	-23.85900025
M2612	2A	0	0.007479848	0.360824742	99	0.117564881	0.190184924	1	-17.15760192
M6278	3A	41376359	0.007607184	0.195876289	99	0.117564881	0.189865267	1	19.12881618
M14467	7A	60679438	0.007738198	0.030927835	99	0.117564881	0.189542144	1	39.05502733
M11148	5B	529048297	0.007790348	0.422680412	99	0.117564881	0.189415109	1	23.24017221
M2904	2A	502932671	0.007816257	0.402061856	99	0.117564881	0.189352325	1	-16.67852229
M7387	3B	714302155	0.007820126	0.164948454	99	0.117564881	0.189342967	1	17.604357
M1358	1B	7319459	0.00788429	0.309278351	99	0.117564881	0.189188491	1	16.35386977
M4179	2B	75627521	0.007967109	0.360824742	99	0.117564881	0.18899103	1	-26.16289626
M4771	2B	731476082	0.008295998	0.144329897	99	0.117564881	0.188227458	1	-20.97187784
M2992	2A	710105092	0.008318002	0.494845361	99	0.117564881	0.188177503	1	-19.19210752
M3576	2B	33729208	0.008333471	0.288659794	99	0.117564881	0.188142468	1	18.49354065
M2752	2A	475582233	0.008347011	0.494845361	99	0.117564881	0.188111856	1	20.23051998
M9506	4B	449189961	0.008455128	0.371134021	99	0.117564881	0.187869269	1	-13.58733681
M9233	4A	346700291	0.008540271	0.443298969	99	0.117564881	0.187680496	1	-17.9543988
M6892	3B	7791132	0.008570292	0.18556701	99	0.117564881	0.187614404	1	16.57156787
M11820	5B	212365503	0.008648778	0.309278351	99	0.117564881	0.187442748	1	-18.57543294
M9503	4B	558148549	0.008681279	0.371134021	99	0.117564881	0.187372142	1	36.76127616
M6305	3A	52962542	0.008843814	0.18556701	99	0.117564881	0.187023132	1	18.64639237
M9755	4D	220375714	0.008951202	0.402061856	99	0.117564881	0.18679619	1	-30.85070587
M3531	2B	9887842	0.008993197	0.360824742	99	0.117564881	0.186708215	1	19.73707155
M4091	2B	445251666	0.009041331	0.494845361	99	0.117564881	0.186607905	1	-19.5829172
M13248	6B	178019384	0.009072663	0.268041237	99	0.117564881	0.18654291	1	16.28934329
M4073	2B	236592763	0.009227039	0.24742268	99	0.117564881	0.186226053	1	23.36792522
M4750	2B	578988490	0.009307842	0.371134021	99	0.117564881	0.186062403	1	17.14414109
M4234	2B	388778942	0.009482403	0.329896907	99	0.117564881	0.185713875	1	-16.44179476
M328	1A	480826950	0.00952511	0.051546392	99	0.117564881	0.185629625	1	26.04519288
M11547	5B	332444025	0.009554202	0.309278351	99	0.117564881	0.18557246	1	19.23765681
M7039	3B	17613543	0.009635442	0.206185567	99	0.117564881	0.185413785	1	19.92977287
M2129	1D	244297621	0.00970732	0.484536082	99	0.117564881	0.185274555	1	-27.95007939
M3137	2A	0	0.009763344	0.422680412	99	0.117564881	0.185166779	1	-15.74992202
M8560	4A	48889994	0.009768868	0.226804124	99	0.117564881	0.185156187	1	19.19669112
M14135	7A	4013265	0.009801421	0.422680412	99	0.117564881	0.185093899	1	14.12050712
M1565	1B	592833254	0.009911989	0.474226804	99	0.117564881	0.184883928	1	-13.82417841
M1027	1B	206100463	0.009951326	0.319587629	99	0.117564881	0.184809816	1	-23.86308552
M4557	2B	51589506	0.01011508	0.319587629	99	0.117564881	0.184504554	1	17.30332674
M11100	5B	549422619	0.010215029	0.360824742	99	0.117564881	0.184320761	1	35.26979218
M829	1B	441543004	0.010336504	0.412371134	99	0.117564881	0.1840999	1	24.19889857
M3693	2B	68579934	0.010341042	0.319587629	99	0.117564881	0.184091701	1	23.76542531
M15569	7B	653890555	0.010371113	0.072164948	99	0.117564881	0.18403747	1	-32.99566238
M6631	3A	691041856	0.010401839	0.237113402	99	0.117564881	0.183982229	1	19.15342753
M11383	5B	536178751	0.010777193	0.216494845	99	0.117564881	0.183320826	1	-15.94186948
M10019	5A	386840959	0.010986593	0.360824742	99	0.117564881	0.182962233	1	14.96286159
M4558	2B	51589506	0.011070104	0.309278351	99	0.117564881	0.182821213	1	-15.57240367
M6185	3A	320920365	0.011175836	0.329896907	99	0.117564881	0.182644256	1	39.37807817
M331	1A	474702375	0.011182583	0.319587629	99	0.117564881	0.182633024	1	54.52436135
M1231	1B	86102631	0.011238882	0.288659794	99	0.117564881	0.182539571	1	-15.06961124
M7754	3B	420365956	0.011259199	0.484536082	99	0.117564881	0.182505967	1	-17.62893062
M3594	2B	506395762	0.011265645	0.422680412	99	0.117564881	0.182495318	1	13.70256985
M2298	1D	488579573	0.011366271	0.329896907	99	0.117564881	0.182329911	1	-16.3464237
M7090	3B	22917259	0.011402834	0.06185567	99	0.117564881	0.182270188	1	-29.53882297
M1736	1B	635977802	0.011434132	0.278350515	99	0.117564881	0.182219225	1	16.20936932
M2771	2A	432372670	0.011480089	0.463917526	99	0.117564881	0.182144655	1	28.81443462
M3573	2B	40354316	0.011648423	0.412371134	99	0.117564881	0.181874159	1	-19.83080845
M14298	7A	15997601	0.011700713	0.092783505	99	0.117564881	0.181790966	1	25.56908126
M5028	2B	758922449	0.011803292	0.422680412	99	0.117564881	0.181628888	1	22.54788982
M72	1A	10132748	0.011836876	0.154639175	99	0.117564881	0.181576144	1	23.12306892
M10865	5B	128642164	0.012097826	0.082474227	99	0.117564881	0.181171584	1	22.69550771
M3579	2B	40893976	0.012117763	0.381443299	99	0.117564881	0.181141052	1	-19.3043665
M681	1A	30141081	0.012249662	0.226804124	99	0.117564881	0.180940369	1	-17.14631285
M4001	2B	213709998	0.012306254	0.195876289	99	0.117564881	0.180854959	1	17.89365842
M8082	3B	793011311	0.012345741	0.340206186	99	0.117564881	0.180795606	1	-27.63407121
M4110	2B	384320443	0.012468169	0.082474227	99	0.117564881	0.180612842	1	26.27427979
M14797	7A	626324494	0.01258831	0.051546392	99	0.117564881	0.18043531	1	-31.51236597
M7973	3B	113713782	0.012709969	0.443298969	99	0.117564881	0.180257334	1	-17.81252184
M11883	5D	6459997	0.012748012	0.041237113	99	0.117564881	0.180202047	1	32.13173712
M4203	2B	677048859	0.01285021	0.154639175	99	0.117564881	0.180054376	1	18.14948248
M2975	2A	573863390	0.012875027	0.474226804	99	0.117564881	0.180018701	1	-18.25636072
M506	1A	546799796	0.01303867	0.381443299	99	0.117564881	0.179785257	1	14.37189672
M9386	4A	739304166	0.013120196	0.371134021	99	0.117564881	0.1796701	1	16.01360972
M3018	2A	696839554	0.013155901	0.092783505	99	0.117564881	0.179619901	1	22.43910289
M2963	2A	0	0.013186685	0.474226804	99	0.117564881	0.179576736	1	-14.1612976
M14260	7A	0	0.013220095	0.24742268	99	0.117564881	0.179530007	1	-14.70724453
M15503	7B	605954397	0.013274788	0.453608247	99	0.117564881	0.179453779	1	13.19008012
M1475	1B	544133182	0.013399954	0.432989691	99	0.117564881	0.17928056	1	-14.50591943
M2995	2A	711468133	0.013469207	0.422680412	99	0.117564881	0.179185446	1	-18.39148305
M15495	7B	607525751	0.013488207	0.350515464	99	0.117564881	0.179159441	1	-43.76550319
M15510	7B	8867615	0.013488207	0.350515464	99	0.117564881	0.179159441	1	43.76550319
M15523	7B	591698895	0.013488207	0.350515464	99	0.117564881	0.179159441	1	43.76550319
M11220	5B	628455006	0.01349434	0.443298969	99	0.117564881	0.179151055	1	-19.54471629
M1618	1B	628627682	0.013509001	0.474226804	99	0.117564881	0.179131024	1	16.53978101
M14019	6D	9514548	0.013551812	0.443298969	99	0.117564881	0.179072663	1	-20.77146118
M3384	2A	585501135	0.013563616	0.268041237	99	0.117564881	0.179056605	1	-13.18915428
M4513	2B	299291476	0.013592459	0.340206186	99	0.117564881	0.179017431	1	23.5798869
M1626	1B	614701448	0.013768233	0.144329897	99	0.117564881	0.17878056	1	18.77950986
M13860	6D	1373301	0.013770811	0.309278351	99	0.117564881	0.178777109	1	-15.99468929
M11740	5B	676094493	0.013813008	0.371134021	99	0.117564881	0.178720729	1	35.57879289
M2754	2A	413620700	0.014223891	0.175257732	99	0.117564881	0.178180988	1	-32.662185
M7523	3B	60366248	0.014379849	0.268041237	99	0.117564881	0.177980389	1	-14.89209574
M10869	5B	481174569	0.014403298	0.463917526	99	0.117564881	0.177950425	1	21.5808074
M6465	3A	91013228	0.014457657	0.268041237	99	0.117564881	0.177881161	1	27.84237273
M951	1B	11664406	0.01454953	0.030927835	99	0.117564881	0.177764714	1	-36.53014574
M15513	7B	611339700	0.01460628	0.226804124	99	0.117564881	0.177693171	1	18.05550158
M7423	3B	237976322	0.014669093	0.298969072	99	0.117564881	0.177614321	1	18.11542859
M7105	3B	21863643	0.014687742	0.257731959	99	0.117564881	0.177590981	1	-14.95645599
M3947	2B	657438242	0.014734914	0.432989691	99	0.117564881	0.177532076	1	25.86787407
M11647	5B	609144429	0.014749755	0.340206186	99	0.117564881	0.177513585	1	-34.16470649
M15500	7B	374288014	0.014853483	0.268041237	99	0.117564881	0.177384889	1	-15.48245379
M1331	1B	505061911	0.015045256	0.453608247	99	0.117564881	0.177149419	1	19.42481182
M7126	3B	23162218	0.015065765	0.412371134	99	0.117564881	0.177124424	1	22.70745132
M7510	3B	485581903	0.015126904	0.278350515	99	0.117564881	0.17705012	1	20.56331482
M8213	3B	823913888	0.015161169	0.288659794	99	0.117564881	0.177008617	1	-19.25090276
M4474	2B	638230965	0.015163336	0.278350515	99	0.117564881	0.177005995	1	16.07617429
M3593	2B	506395762	0.015215436	0.432989691	99	0.117564881	0.176943085	1	-13.36785117
M2864	2A	243687217	0.015353701	0.06185567	99	0.117564881	0.176777222	1	-23.76690363
M3281	2A	773395688	0.015423754	0.474226804	99	0.117564881	0.176693783	1	30.00315563
M10898	5B	525773748	0.015486582	0.082474227	99	0.117564881	0.176619288	1	23.17534764
M15432	7B	556686638	0.015637928	0.072164948	99	0.117564881	0.176441132	1	-28.17743595
M10879	5B	0	0.015654176	0.360824742	99	0.117564881	0.176422113	1	14.7107672
M12292	6A	17317261	0.015888511	0.237113402	99	0.117564881	0.176150103	1	-14.68319007
M3892	2B	110980776	0.015944307	0.175257732	99	0.117564881	0.176085957	1	19.22039626
M13745	6B	462838981	0.015951391	0.371134021	99	0.117564881	0.17607783	1	14.25216046
M3606	2B	163007189	0.016068297	0.463917526	99	0.117564881	0.175944253	1	-13.63550599
M3540	2B	28720546	0.01614405	0.226804124	99	0.117564881	0.175858241	1	-18.8527216
M6881	3A	609286936	0.016198827	0.226804124	99	0.117564881	0.17579631	1	-15.66610242
M812	1B	0	0.016202921	0.278350515	99	0.117564881	0.17579169	1	-20.21339297
M15138	7A	736378833	0.016292155	0.329896907	99	0.117564881	0.175691297	1	27.69914086
M3294	2A	706493326	0.016307828	0.329896907	99	0.117564881	0.175673724	1	-17.39508492
M9216	4A	720887655	0.01640779	0.237113402	99	0.117564881	0.175562058	1	-16.25251755
M4159	2B	154633225	0.016431712	0.494845361	99	0.117564881	0.175535441	1	19.70846046
M8900	4A	668854110	0.016466958	0.268041237	99	0.117564881	0.175496299	1	22.34945387
M2943	2A	691753703	0.016488581	0.463917526	99	0.117564881	0.175472328	1	-12.75331341
M9781	4D	446124259	0.01652238	0.340206186	99	0.117564881	0.175434927	1	-27.94999505
M332	1A	474702375	0.016582919	0.010309278	99	0.117564881	0.175368136	1	-50.84986288
M8218	3B	826654769	0.016582919	0.010309278	99	0.117564881	0.175368136	1	-50.84986288
M15518	7B	601776139	0.01658863	0.268041237	99	0.117564881	0.175361849	1	-18.90116214
M3149	2A	569979056	0.016746598	0.237113402	99	0.117564881	0.175188829	1	-18.22530168
M834	1B	21523277	0.01690406	0.237113402	99	0.117564881	0.175018063	1	-14.67763831
M2173	1D	415773502	0.016926878	0.402061856	99	0.117564881	0.174993455	1	-21.1091303
M4917	2B	749968556	0.016944546	0.340206186	99	0.117564881	0.174974426	1	-20.0314716
M4437	2B	658484745	0.01695853	0.309278351	99	0.117564881	0.174959379	1	-13.84789853
M9896	5A	82132019	0.017162088	0.051546392	99	0.117564881	0.174741815	1	24.9168761
M5775	2D	590146863	0.017221455	0.494845361	99	0.117564881	0.174678875	1	-16.77696241
M6883	3B	35796740	0.017239384	0.237113402	99	0.117564881	0.174659911	1	-16.14162272
M9625	4B	652962151	0.017298175	0.443298969	99	0.117564881	0.174597872	1	12.42912638
M12100	6A	9798353	0.017306025	0.268041237	99	0.117564881	0.174589605	1	17.28986069
M5585	2D	459879715	0.017352767	0.432989691	99	0.117564881	0.174540463	1	13.76602886
M9419	4A	739759017	0.017437183	0.391752577	99	0.117564881	0.174452064	1	-25.30882294
M1357	1B	7319459	0.017470589	0.164948454	99	0.117564881	0.174417207	1	-17.54651419
M14664	7A	130302724	0.017485772	0.402061856	99	0.117564881	0.174401387	1	13.86216882
M6127	3A	19895266	0.017488553	0.288659794	99	0.117564881	0.17439849	1	-13.185808
M1464	1B	557465111	0.017537705	0.237113402	99	0.117564881	0.174347385	1	14.4742193
M1232	1B	86102631	0.017540574	0.257731959	99	0.117564881	0.174344406	1	19.7566682
M15338	7B	382617987	0.017568116	0.360824742	99	0.117564881	0.17431584	1	-14.86537152
M13905	6D	10735296	0.017572075	0.329896907	99	0.117564881	0.174311737	1	17.64800686
M936	1B	17537164	0.017751985	0.278350515	99	0.117564881	0.174126332	1	14.77778786
M3166	2A	759821777	0.017964945	0.340206186	99	0.117564881	0.173909403	1	15.58475095
M7154	3B	24262407	0.018005951	0.319587629	99	0.117564881	0.173867944	1	25.94341094
M13897	6D	7716534	0.01807443	0.319587629	99	0.117564881	0.173798929	1	16.47249179
M7281	3B	48788274	0.01814698	0.340206186	99	0.117564881	0.173726111	1	16.67249472
M1743	1B	193426988	0.018235463	0.422680412	99	0.117564881	0.173637713	1	22.40654159
M15020	7A	712493182	0.018250444	0.206185567	99	0.117564881	0.173622792	1	16.47265879
M13250	6B	128193460	0.01830912	0.082474227	99	0.117564881	0.173564471	1	-21.12616098
M3784	2B	91146822	0.018346064	0.144329897	99	0.117564881	0.173527852	1	-18.13170967
M14627	7A	124069487	0.018504497	0.484536082	99	0.117564881	0.173371687	1	-21.30281137
M3506	2B	24887527	0.018511017	0.216494845	99	0.117564881	0.173365291	1	14.00459821
M11648	5B	609144429	0.018856721	0.257731959	99	0.117564881	0.173029489	1	18.48816096
M14310	7A	17286301	0.018908175	0.092783505	99	0.117564881	0.172980064	1	23.00824702
M2619	2A	104921223	0.018951847	0.309278351	99	0.117564881	0.172938225	1	-17.8805752
M8183	3B	609741282	0.018980239	0.463917526	99	0.117564881	0.172911078	1	-19.37126833
M6371	3A	202000975	0.01901327	0.474226804	99	0.117564881	0.172879551	1	-19.62568744
M14245	7A	600721014	0.019182781	0.082474227	99	0.117564881	0.172718656	1	-24.00534435
M6269	3A	52210548	0.01931197	0.443298969	99	0.117564881	0.172597036	1	-13.71261601
M13775	6B	0	0.019371112	0.494845361	99	0.117564881	0.172541645	1	-15.18638532
M4364	2B	540660555	0.019422821	0.463917526	99	0.117564881	0.17249336	1	-13.86722358
M6957	3B	35203565	0.019477023	0.309278351	99	0.117564881	0.172442893	1	16.71297546
M7690	3B	665443211	0.019503378	0.288659794	99	0.117564881	0.172418408	1	14.75180018
M12946	6A	468839603	0.019507874	0.134020619	99	0.117564881	0.172414234	1	-18.73414883
M15109	7A	726770648	0.019535893	0.144329897	99	0.117564881	0.172388247	1	23.13672057
M3987	2B	159210768	0.01955232	0.329896907	99	0.117564881	0.17237303	1	-24.01887906
M2973	2A	541992663	0.019640295	0.463917526	99	0.117564881	0.172291762	1	-13.72117381
M5027	2B	758922449	0.019712969	0.381443299	99	0.117564881	0.172224917	1	-14.97790187
M3607	2B	43237442	0.019740241	0.432989691	99	0.117564881	0.172199899	1	-17.81420245
M7977	3B	762845618	0.01986882	0.216494845	99	0.117564881	0.172082437	1	-16.07195742
M13268	6B	472958277	0.02000683	0.371134021	99	0.117564881	0.171957247	1	-15.10799913
M6311	3A	69361313	0.020026137	0.371134021	99	0.117564881	0.171939806	1	17.45854659
M5232	2B	794002225	0.020107963	0.12371134	99	0.117564881	0.171866085	1	-22.35013605
M1702	1B	453549548	0.020326094	0.453608247	99	0.117564881	0.171671094	1	-13.91997926
M11177	5B	0	0.020330554	0.06185567	99	0.117564881	0.171667129	1	27.80467658
M5500	2D	74936166	0.020368491	0.360824742	99	0.117564881	0.17163345	1	15.36895264
M12226	6A	17652529	0.020385594	0.319587629	99	0.117564881	0.171618289	1	15.76793783
M9508	4B	449269878	0.02045417	0.340206186	99	0.117564881	0.171557629	1	12.47044591
M7428	3B	303590858	0.0204932	0.154639175	99	0.117564881	0.171523201	1	15.60411986
M194	1A	489600357	0.020510406	0.484536082	99	0.117564881	0.171508045	1	15.85415946
M3552	2B	30630417	0.020622185	0.298969072	99	0.117564881	0.171409912	1	17.48489478
M3372	2A	0	0.020714142	0.257731959	99	0.117564881	0.171329601	1	15.29690996
M976	1B	94373668	0.020717966	0.298969072	99	0.117564881	0.17132627	1	-21.5829264
M2673	2A	0	0.020769863	0.474226804	99	0.117564881	0.171281119	1	29.65084643
M15090	7A	83643438	0.020928442	0.144329897	99	0.117564881	0.17114389	1	-21.89191444
M3587	2B	25050436	0.020950742	0.463917526	99	0.117564881	0.17112468	1	12.82601042
M3080	2A	736066326	0.020979329	0.350515464	99	0.117564881	0.171100086	1	14.00638155
M7697	3B	669426645	0.021002302	0.422680412	99	0.117564881	0.171080348	1	-14.17747901
M9418	4A	740144144	0.021038987	0.412371134	99	0.117564881	0.171048875	1	24.82992592
M9825	5A	0	0.021073146	0.412371134	99	0.117564881	0.171019621	1	15.81522648
M3739	2B	72162639	0.021263995	0.391752577	99	0.117564881	0.170857092	1	15.1825875
M3856	2B	69509022	0.021353602	0.154639175	99	0.117564881	0.170781312	1	-16.47284917
M9383	4A	739304166	0.02144784	0.288659794	99	0.117564881	0.170701977	1	14.4643415
M4204	2B	677048859	0.021491881	0.360824742	99	0.117564881	0.170665027	1	-36.24066058
M4505	2B	548631440	0.021491881	0.360824742	99	0.117564881	0.170665027	1	-36.24066058
M10002	5A	394754024	0.021553169	0.443298969	99	0.117564881	0.170613738	1	-12.93429898
M4212	2B	202596151	0.021574724	0.371134021	99	0.117564881	0.170595737	1	-31.51465465
M4157	2B	508332601	0.021574724	0.371134021	99	0.117564881	0.170595737	1	31.51465465
M12314	6A	0	0.021606959	0.443298969	99	0.117564881	0.170568851	1	-14.7362679
M8851	4A	111059555	0.021672902	0.298969072	99	0.117564881	0.170513984	1	-15.11151197
M1204	1B	116830677	0.02178356	0.237113402	99	0.117564881	0.170422305	1	-17.43008657
M6431	3A	509564298	0.021798624	0.412371134	99	0.117564881	0.170409863	1	-23.23475485
M11689	5B	641926536	0.021804878	0.144329897	99	0.117564881	0.1704047	1	16.07303413
M12044	6A	1033153	0.021963599	0.24742268	99	0.117564881	0.170274191	1	-16.6418712
M1474	1B	0	0.0220876	0.175257732	99	0.117564881	0.170172921	1	17.46235725
M8969	4A	649885889	0.022100435	0.422680412	99	0.117564881	0.170162473	1	13.12527664
M4789	2B	601212198	0.022307082	0.463917526	99	0.117564881	0.169995135	1	-12.51518246
M9417	4A	740144144	0.022386055	0.18556701	99	0.117564881	0.169931616	1	-20.73449381
M3580	2B	40893976	0.022455007	0.24742268	99	0.117564881	0.169876351	1	-16.59113117
M4748	2B	147968189	0.02249837	0.144329897	99	0.117564881	0.169841686	1	-17.24809217
M2482	2A	17830049	0.022607995	0.206185567	99	0.117564881	0.169754366	1	20.44147569
M11830	5B	692755670	0.02261067	0.360824742	99	0.117564881	0.169752241	1	-27.80561635
M11685	5B	275637230	0.022732918	0.226804124	99	0.117564881	0.169655404	1	16.4563059
M6923	3B	7302120	0.022760096	0.329896907	99	0.117564881	0.16963395	1	-13.42109991
M15402	7B	511064939	0.022799398	0.360824742	99	0.117564881	0.169602973	1	-32.12789223
M13889	6D	6268088	0.023003375	0.494845361	99	0.117564881	0.169443104	1	-15.10188304
M2956	2A	606635188	0.023043763	0.453608247	99	0.117564881	0.169411627	1	11.95962796
M12423	6A	54772476	0.023059687	0.12371134	99	0.117564881	0.169399233	1	22.83267788
M2631	2A	102322925	0.023151232	0.463917526	99	0.117564881	0.169328153	1	-15.78818635
M9391	4A	732814470	0.023157955	0.24742268	99	0.117564881	0.169322945	1	-13.16044804
M875	1B	47925443	0.023237735	0.268041237	99	0.117564881	0.16926126	1	21.52591487
M366	1A	0	0.02337378	0.268041237	99	0.117564881	0.169156587	1	-16.93475468
M12813	6A	458483574	0.023478928	0.432989691	99	0.117564881	0.169076127	1	-15.63099769
M14319	7A	0	0.023561864	0.278350515	99	0.117564881	0.16901293	1	15.0792637
M15556	7B	670917940	0.02363519	0.298969072	99	0.117564881	0.168957253	1	-15.19736831
M1954	1B	260327837	0.02396077	0.195876289	99	0.117564881	0.168712218	1	13.50834887
M5592	2D	739690772	0.024062766	0.494845361	99	0.117564881	0.168636178	1	14.44996899
M2912	2A	676994096	0.024102076	0.340206186	99	0.117564881	0.168606963	1	-20.03748518
M4681	2B	706398142	0.02411139	0.484536082	99	0.117564881	0.168600047	1	-11.82569696
M10112	5A	441668884	0.024245217	0.06185567	99	0.117564881	0.168501003	1	-23.20853073
M6885	3B	0	0.024564019	0.268041237	99	0.117564881	0.168267369	1	13.69082436
M153	1A	31918043	0.024612617	0.226804124	99	0.117564881	0.168232035	1	18.88732326
M15470	7B	597251943	0.024857539	0.154639175	99	0.117564881	0.168055079	1	19.10709866
M14440	7A	36512654	0.024946699	0.484536082	99	0.117564881	0.167991118	1	-25.42583911
M5244	2B	796598273	0.025076186	0.12371134	99	0.117564881	0.167898657	1	17.41568853
M7272	3B	478901478	0.02507905	0.484536082	99	0.117564881	0.167896618	1	13.24418672
M10391	5A	513747862	0.025084768	0.134020619	99	0.117564881	0.167892547	1	20.7187886
M2168	1D	423928525	0.025152097	0.371134021	99	0.117564881	0.167844687	1	14.04870943
M9884	5A	199146737	0.025276014	0.298969072	99	0.117564881	0.167756955	1	-13.99907167
M9379	4A	0	0.025353854	0.268041237	99	0.117564881	0.167702078	1	-16.70864399
M9473	4B	189530997	0.025363822	0.051546392	99	0.117564881	0.167695063	1	27.13742221
M4808	2B	736110500	0.025594354	0.443298969	99	0.117564881	0.167533643	1	-20.15804678
M647	1A	584104138	0.025660164	0.134020619	99	0.117564881	0.167487845	1	-14.9880373
M2094	1D	732056365	0.02567572	0.154639175	99	0.117564881	0.167477037	1	-31.23832744
M2750	2A	561848369	0.02567572	0.154639175	99	0.117564881	0.167477037	1	31.23832744
M11637	5B	598146738	0.02568305	0.309278351	99	0.117564881	0.167471948	1	21.18017379
M14297	7A	15997601	0.025709009	0.237113402	99	0.117564881	0.167453933	1	-14.08219913
M3553	2B	0	0.025733407	0.298969072	99	0.117564881	0.16743702	1	-16.15316566
M5802	2D	729134384	0.025735152	0.402061856	99	0.117564881	0.167435811	1	-16.92938013
M13155	6B	0	0.025813848	0.350515464	99	0.117564881	0.167381376	1	-14.73441818
M801	1B	37951885	0.025856943	0.329896907	99	0.117564881	0.167351641	1	28.56731347
M9688	4B	0	0.026055891	0.402061856	99	0.117564881	0.167215046	1	15.49520547
M3928	2B	180555363	0.02619325	0.103092784	99	0.117564881	0.16712138	1	18.09787661
M630	1A	481552064	0.026541141	0.268041237	99	0.117564881	0.166886457	1	13.53892185
M8429	3D	18704148	0.026753616	0.474226804	99	0.117564881	0.166744575	1	-12.38956397
M15514	7B	611339700	0.026834524	0.494845361	99	0.117564881	0.166690862	1	19.52476543
M9431	4A	2055214	0.026906996	0.422680412	99	0.117564881	0.166642894	1	22.85860572
M15576	7B	647426653	0.026975385	0.175257732	99	0.117564881	0.166597755	1	-18.58958588
M2377	2A	0	0.026989755	0.494845361	99	0.117564881	0.166588285	1	-17.26022811
M60	1A	150793813	0.027050086	0.288659794	99	0.117564881	0.166548587	1	-15.91739723
M14267	7A	14297975	0.0270543	0.463917526	99	0.117564881	0.166545817	1	-17.94973745
M300	1A	387369246	0.027181574	0.474226804	99	0.117564881	0.16646239	1	-17.39449342
M10026	5A	48673396	0.027349745	0.113402062	99	0.117564881	0.166352788	1	17.99566445
M3896	2B	118063648	0.027350558	0.175257732	99	0.117564881	0.166352261	1	-15.38669115
M9598	4B	581078619	0.027529285	0.175257732	99	0.117564881	0.166236562	1	18.10024808
M11238	5B	499309809	0.027607712	0.402061856	99	0.117564881	0.166186044	1	-11.64293472
M14378	7A	701571182	0.027766891	0.24742268	99	0.117564881	0.166083975	1	-14.17940383
M12291	6A	17317261	0.027775653	0.381443299	99	0.117564881	0.166078375	1	17.30860043
M13613	6B	675702168	0.027782848	0.319587629	99	0.117564881	0.166073777	1	-23.30243372
M9179	4A	709851704	0.027801258	0.360824742	99	0.117564881	0.16606202	1	-14.94048231
M6310	3A	0	0.027870936	0.18556701	99	0.117564881	0.166017594	1	17.24574223
M3997	2B	0	0.027947073	0.319587629	99	0.117564881	0.165969184	1	-25.33676246
M11548	5B	332444025	0.028014517	0.041237113	99	0.117564881	0.165926419	1	-26.55371135
M13453	6B	59363266	0.028041124	0.350515464	99	0.117564881	0.165909577	1	12.36264678
M966	1B	50203925	0.028074422	0.134020619	99	0.117564881	0.165888524	1	19.69427028
M14592	7A	94495522	0.028120667	0.206185567	99	0.117564881	0.16585933	1	15.85119905
M2381	2A	19836679	0.028183452	0.422680412	99	0.117564881	0.165819775	1	-18.69555587
M3291	2A	645613495	0.028221287	0.381443299	99	0.117564881	0.165795984	1	-16.23563298
M3967	2B	176172344	0.028237628	0.391752577	99	0.117564881	0.165785719	1	14.34664787
M7646	3B	590292239	0.02834511	0.226804124	99	0.117564881	0.165718358	1	-17.45594728
M15186	7B	33652142	0.028389358	0.154639175	99	0.117564881	0.165690705	1	-17.34822221
M11513	5B	559992958	0.028390113	0.195876289	99	0.117564881	0.165690234	1	16.38433274
M8342	3D	37969599	0.028543991	0.154639175	99	0.117564881	0.165594426	1	18.87529565
M2496	2A	36696937	0.028609025	0.226804124	99	0.117564881	0.165554099	1	17.70895622
M1785	1B	646178482	0.028688992	0.268041237	99	0.117564881	0.165504645	1	13.26199813
M14423	7A	35387463	0.028754651	0.154639175	99	0.117564881	0.165464149	1	24.86163978
M3877	2B	417215705	0.028817284	0.443298969	99	0.117564881	0.16542561	1	-17.56572251
M7173	3B	41138847	0.028913004	0.432989691	99	0.117564881	0.165366885	1	12.48222567
M12476	6A	113852300	0.028999618	0.288659794	99	0.117564881	0.165313923	1	-17.33433271
M14128	7A	0	0.029067181	0.463917526	99	0.117564881	0.165272726	1	13.50506403
M10777	5B	398715853	0.029195351	0.402061856	99	0.117564881	0.165194853	1	-15.3860548
M9236	4A	716789227	0.02931691	0.443298969	99	0.117564881	0.165121331	1	10.61565143
M3963	2B	165049205	0.029428752	0.371134021	99	0.117564881	0.165053971	1	27.93412909
M6948	3B	5857902	0.029474324	0.237113402	99	0.117564881	0.165026602	1	17.55349646
M5227	2B	643330937	0.029589282	0.381443299	99	0.117564881	0.16495776	1	17.21064421
M2905	2A	21223660	0.029658608	0.350515464	99	0.117564881	0.164916382	1	-38.20987537
M15376	7B	518835133	0.029728439	0.402061856	99	0.117564881	0.164874807	1	15.83377301
M2308	1D	683382396	0.029769617	0.268041237	99	0.117564881	0.164850338	1	-13.89409229
M4685	2B	704429363	0.029925154	0.226804124	99	0.117564881	0.164758241	1	15.08341154
M9641	4B	509511919	0.029925329	0.051546392	99	0.117564881	0.164758138	1	26.35139773
M4957	2B	761846794	0.029958891	0.216494845	99	0.117564881	0.164738332	1	17.29654432
M7517	3B	426296060	0.029971366	0.319587629	99	0.117564881	0.164730976	1	-18.279091
M13995	6D	156753575	0.030010898	0.257731959	99	0.117564881	0.164707687	1	-20.42553153
M3927	2B	180555363	0.030057489	0.319587629	99	0.117564881	0.164680281	1	-16.70214232
M536	1A	551910173	0.030100825	0.329896907	99	0.117564881	0.164654831	1	-13.5192425
M11660	5B	18994764	0.030107796	0.350515464	99	0.117564881	0.164650741	1	-42.00489186
M1049	1B	111514140	0.030107796	0.350515464	99	0.117564881	0.164650741	1	42.00489186
M11667	5B	495035120	0.030107796	0.350515464	99	0.117564881	0.164650741	1	42.00489186
M9124	4A	702727123	0.030107796	0.350515464	99	0.117564881	0.164650741	1	42.00489186
M5036	2B	767121912	0.03013435	0.432989691	99	0.117564881	0.164635169	1	14.69179455
M15478	7B	258623016	0.030191543	0.298969072	99	0.117564881	0.16460168	1	-16.73589201
M10017	5A	703528447	0.030227287	0.412371134	99	0.117564881	0.164580784	1	13.75245566
M13267	6B	472958277	0.030514252	0.484536082	99	0.117564881	0.16441397	1	11.98593118
M4088	2B	94344351	0.030599373	0.484536082	99	0.117564881	0.16436481	1	-16.9335824
M2068	1D	52680610	0.030688753	0.474226804	99	0.117564881	0.164313345	1	-25.52356237
M9565	4B	607638063	0.030692916	0.453608247	99	0.117564881	0.164310952	1	17.38330264
M897	1B	32775858	0.030760355	0.340206186	99	0.117564881	0.164272231	1	-11.86078482
M8284	3D	7272771	0.03076942	0.371134021	99	0.117564881	0.164267034	1	-25.11725423
M4165	2B	221486089	0.03081005	0.453608247	99	0.117564881	0.164243756	1	21.04431735
M3273	2A	769032955	0.030914415	0.391752577	99	0.117564881	0.164184114	1	-14.06057486
M2998	2A	711468133	0.031113035	0.226804124	99	0.117564881	0.164071196	1	-16.76594323
M7065	3B	15124529	0.03120952	0.371134021	99	0.117564881	0.164016619	1	-13.07053279
M10682	5B	56912565	0.031363039	0.309278351	99	0.117564881	0.163930149	1	-12.85505813
M6165	3A	412102912	0.031397117	0.484536082	99	0.117564881	0.163911015	1	-15.91719527
M14365	7A	20403281	0.03141604	0.072164948	99	0.117564881	0.163900401	1	-21.87777267
M11770	5B	683000490	0.031438122	0.381443299	99	0.117564881	0.163888022	1	-27.43490114
M11743	5B	680852435	0.031438122	0.381443299	99	0.117564881	0.163888022	1	27.43490114
M6417	3A	512556910	0.031439109	0.309278351	99	0.117564881	0.163887469	1	-37.00921954
M3685	2B	75402640	0.031621718	0.443298969	99	0.117564881	0.163785459	1	17.6140672
M9958	5A	74419583	0.031645132	0.164948454	99	0.117564881	0.163772425	1	15.31823104
M8019	3B	765843802	0.03172087	0.113402062	99	0.117564881	0.163730332	1	17.83821976
M9414	4A	743748313	0.031751218	0.381443299	99	0.117564881	0.163713496	1	19.22120346
M2640	2A	82187693	0.031766443	0.402061856	99	0.117564881	0.163705056	1	23.74906274
M11310	5B	4902436	0.031783977	0.24742268	99	0.117564881	0.163695341	1	13.53208857
M3563	2B	419250206	0.031868819	0.350515464	99	0.117564881	0.163648415	1	-12.6018635
M12221	6A	13902305	0.031945206	0.350515464	99	0.117564881	0.163606279	1	13.39664072
M10554	5B	9044910	0.032003595	0.340206186	99	0.117564881	0.163574142	1	12.6861554
M6986	3B	680113396	0.032063551	0.144329897	99	0.117564881	0.163541208	1	14.90847636
M15522	7B	400828319	0.032091653	0.422680412	99	0.117564881	0.163525794	1	17.48196946
M592	1A	420194142	0.032238383	0.226804124	99	0.117564881	0.163445545	1	13.85200645
M15070	7A	718992613	0.032252758	0.154639175	99	0.117564881	0.163437704	1	-17.61324398
M8250	3D	3194034	0.032263518	0.350515464	99	0.117564881	0.163431837	1	-13.05389451
M8732	4A	521608777	0.032489213	0.051546392	99	0.117564881	0.163309257	1	20.17870107
M3779	2B	90785901	0.032540979	0.422680412	99	0.117564881	0.163281269	1	12.91785805
M163	1A	0	0.032817183	0.484536082	99	0.117564881	0.163132732	1	-11.85191675
M8167	3B	815300848	0.032827619	0.06185567	99	0.117564881	0.163127146	1	-23.92117432
M11908	5D	254497566	0.032850077	0.175257732	99	0.117564881	0.163115131	1	-30.93652909
M9921	5A	39746104	0.032908986	0.216494845	99	0.117564881	0.163083657	1	-15.10772009
M9442	4B	1774223	0.033007278	0.319587629	99	0.117564881	0.163031273	1	-13.49031328
M5512	2D	82890817	0.033048316	0.422680412	99	0.117564881	0.163009452	1	-24.51575295
M2713	2A	133353425	0.033076712	0.463917526	99	0.117564881	0.162994369	1	-26.57925286
M10072	5A	464661923	0.033086622	0.144329897	99	0.117564881	0.162989109	1	16.11711132
M7004	3B	17974227	0.033195766	0.340206186	99	0.117564881	0.162931284	1	-28.24191683
M10288	5A	0	0.033325581	0.041237113	99	0.117564881	0.162862769	1	-22.98018453
M9090	4A	692078422	0.033330837	0.175257732	99	0.117564881	0.162860001	1	-15.87336374
M9929	5A	81414626	0.033375559	0.371134021	99	0.117564881	0.162836468	1	-11.17455199
M5267	2B	581469039	0.033402932	0.432989691	99	0.117564881	0.16282208	1	-22.97318552
M2522	2A	0	0.033516547	0.206185567	99	0.117564881	0.162762495	1	-14.72268288
M6979	3B	13535953	0.033569229	0.329896907	99	0.117564881	0.162734939	1	-14.4137775
M2293	1D	586317908	0.033577514	0.494845361	99	0.117564881	0.16273061	1	-11.55766344
M11901	5D	175947785	0.033685456	0.134020619	99	0.117564881	0.162674308	1	20.45878027
M7656	3B	593933727	0.033773294	0.226804124	99	0.117564881	0.162628634	1	-16.8872132
M9510	4B	481237158	0.033793605	0.288659794	99	0.117564881	0.162618091	1	11.36877062
M8757	4A	595433064	0.033807761	0.350515464	99	0.117564881	0.162610746	1	-12.55950055
M10819	5B	408228341	0.033836228	0.463917526	99	0.117564881	0.162595987	1	16.49531095
M2212	1D	475877262	0.033846386	0.257731959	99	0.117564881	0.162590723	1	-13.71585947
M14677	7A	181697487	0.033917201	0.412371134	99	0.117564881	0.162554077	1	19.58798717
M656	1A	583529682	0.033922119	0.175257732	99	0.117564881	0.162551535	1	-14.18929551
M13906	6D	10735296	0.033968227	0.463917526	99	0.117564881	0.162527722	1	11.75986426
M12186	6A	8439437	0.033988496	0.164948454	99	0.117564881	0.162517264	1	-21.26842448
M13759	6B	715854244	0.034000004	0.288659794	99	0.117564881	0.16251133	1	-12.95143055
M11114	5B	531194944	0.034030061	0.257731959	99	0.117564881	0.162495841	1	-13.03158784
M4253	2B	237159653	0.034205188	0.360824742	99	0.117564881	0.16240588	1	14.61679451
M8756	4A	46952980	0.03429561	0.350515464	99	0.117564881	0.162359623	1	-15.0718113
M15546	7B	641684991	0.034376699	0.164948454	99	0.117564881	0.16231825	1	-15.69196667
M15	1A	25564281	0.034479474	0.309278351	99	0.117564881	0.162265962	1	12.46790631
M39	1A	2236676	0.034619086	0.268041237	99	0.117564881	0.162195199	1	19.43346797
M13477	6B	558500389	0.034738663	0.134020619	99	0.117564881	0.16213483	1	16.79359627
M3669	2B	598294949	0.034758663	0.319587629	99	0.117564881	0.162124755	1	-14.76052329
M12182	6A	7997688	0.034869824	0.402061856	99	0.117564881	0.162068868	1	13.15216299
M5371	2D	13599129	0.034876277	0.268041237	99	0.117564881	0.16206563	1	15.36724439
M12620	6A	563126991	0.03502834	0.412371134	99	0.117564881	0.161989501	1	12.40780601
M3635	2B	504867107	0.035108003	0.360824742	99	0.117564881	0.161949759	1	31.69467324
M579	1A	565296725	0.035130364	0.422680412	99	0.117564881	0.161938621	1	14.22140055
M2331	2A	441309055	0.035291821	0.443298969	99	0.117564881	0.161858421	1	-21.25429593
M3001	2A	715387158	0.035320709	0.257731959	99	0.117564881	0.161844113	1	19.44460487
M591	1A	420194142	0.035350398	0.371134021	99	0.117564881	0.161829421	1	-11.68540102
M7077	3B	20999249	0.03539239	0.257731959	99	0.117564881	0.161808663	1	13.30891909
M14560	7A	75357674	0.035407695	0.18556701	99	0.117564881	0.161801104	1	-14.07326749
M3888	2B	0	0.035437585	0.175257732	99	0.117564881	0.161786352	1	16.5787349
M7433	3B	199675977	0.035513376	0.494845361	99	0.117564881	0.161749003	1	11.6360559
M9149	4A	22270015	0.035520276	0.175257732	99	0.117564881	0.161745607	1	-17.30649529
M3217	2A	781829002	0.035530637	0.443298969	99	0.117564881	0.161740509	1	-15.16257874
M3360	2A	0	0.035540818	0.350515464	99	0.117564881	0.161735501	1	-11.12221589
M6271	3A	52210548	0.035711878	0.443298969	99	0.117564881	0.161651586	1	23.59502363
M6367	3A	502404422	0.035711878	0.443298969	99	0.117564881	0.161651586	1	23.59502363
M3989	2B	126899677	0.035731806	0.350515464	99	0.117564881	0.161641839	1	-26.43363461
M301	1A	357173782	0.035861473	0.391752577	99	0.117564881	0.161578551	1	-19.3682253
M15566	7B	647757237	0.035899448	0.422680412	99	0.117564881	0.161560063	1	-13.67950101
M3123	2A	748451453	0.0359525	0.268041237	99	0.117564881	0.161534269	1	16.63164756
M4592	2B	655520301	0.036004971	0.360824742	99	0.117564881	0.161508798	1	12.64479157
M6224	3A	25036353	0.036088865	0.216494845	99	0.117564881	0.161468154	1	-13.4746774
M10564	5B	11085155	0.036111667	0.309278351	99	0.117564881	0.161457125	1	-29.89898513
M11503	5B	142781109	0.036183533	0.237113402	99	0.117564881	0.161422412	1	-15.14554823
M1187	1B	444058473	0.036189926	0.329896907	99	0.117564881	0.161419327	1	-33.92914762
M6772	3A	0	0.036192671	0.226804124	99	0.117564881	0.161418003	1	17.37491352
M824	1B	16427758	0.036204499	0.329896907	99	0.117564881	0.161412299	1	-14.40259848
M6195	3A	22831857	0.036223903	0.082474227	99	0.117564881	0.161402944	1	-17.79574737
M13921	6D	13970663	0.036239566	0.340206186	99	0.117564881	0.161395397	1	-17.03206905
M13891	6D	6745747	0.036260637	0.494845361	99	0.117564881	0.16138525	1	-16.08426785
M4155	2B	107028709	0.036267317	0.381443299	99	0.117564881	0.161382034	1	24.81468154
M32	1A	7078505	0.036418695	0.072164948	99	0.117564881	0.161309334	1	21.57078705
M6882	3A	609286936	0.03646326	0.24742268	99	0.117564881	0.161287993	1	16.28363824
M15028	7A	711324238	0.03661618	0.412371134	99	0.117564881	0.161214973	1	12.85958431
M14436	7A	34520428	0.03663536	0.463917526	99	0.117564881	0.161205838	1	17.98053529
M4975	2B	675190488	0.036676518	0.319587629	99	0.117564881	0.161186251	1	26.76985575
M5252	2B	790887920	0.03688705	0.103092784	99	0.117564881	0.161086426	1	19.45521972
M6664	3A	702562913	0.036889397	0.278350515	99	0.117564881	0.161085317	1	-15.66422008
M3245	2A	758893842	0.037168904	0.402061856	99	0.117564881	0.160953731	1	10.47803657
M9301	4A	0	0.037184621	0.164948454	99	0.117564881	0.160946363	1	-14.33866414
M13110	6B	39809227	0.037195536	0.422680412	99	0.117564881	0.160941249	1	-12.43732922
M4709	2B	711866548	0.037349046	0.226804124	99	0.117564881	0.160869482	1	-20.59887672
M6164	3A	403940047	0.037417118	0.237113402	99	0.117564881	0.160837759	1	-13.61096676
M6680	3A	709595134	0.037810062	0.113402062	99	0.117564881	0.160655833	1	-15.9006845
M9874	5A	27509864	0.037863832	0.422680412	99	0.117564881	0.160631095	1	-11.83411394
M12238	6A	71414592	0.037875023	0.298969072	99	0.117564881	0.160625951	1	19.98070963
M9809	4D	497938965	0.037911811	0.453608247	99	0.117564881	0.160609053	1	17.32566139
M4737	2B	682744936	0.038000096	0.216494845	99	0.117564881	0.160568573	1	12.59372838
M11711	5B	656909748	0.03842244	0.12371134	99	0.117564881	0.160376296	1	20.06272932
M3821	2B	100325164	0.038462214	0.268041237	99	0.117564881	0.160358305	1	-13.46404698
M13152	6B	100895291	0.038525885	0.484536082	99	0.117564881	0.160329545	1	-14.3216351
M4172	2B	223152424	0.038942124	0.072164948	99	0.117564881	0.160142776	1	21.13403396
M7438	3B	166284603	0.03897725	0.474226804	99	0.117564881	0.160127112	1	14.2245744
M846	1B	17621853	0.038995541	0.268041237	99	0.117564881	0.160118962	1	-12.83356456
M6393	3A	363608529	0.039035976	0.257731959	99	0.117564881	0.160100958	1	-11.71169913
M4918	2B	749968556	0.039045574	0.340206186	99	0.117564881	0.160096688	1	-18.7941452
M4952	2B	762073843	0.039045574	0.340206186	99	0.117564881	0.160096688	1	-18.7941452
M9303	4A	10150766	0.039073021	0.288659794	99	0.117564881	0.160084482	1	11.79303128
M643	1A	543072796	0.039105631	0.484536082	99	0.117564881	0.160069992	1	13.7050601
M10150	5A	458524672	0.039128279	0.360824742	99	0.117564881	0.160059936	1	11.80663572
M11361	5B	180679040	0.03914306	0.298969072	99	0.117564881	0.160053376	1	20.18933474
M721	1B	650103669	0.039275441	0.072164948	99	0.117564881	0.159994745	1	19.94957856
M5075	2B	770091016	0.039331827	0.381443299	99	0.117564881	0.159969836	1	-15.04304231
M3005	2A	709730810	0.039373704	0.432989691	99	0.117564881	0.159951361	1	12.52466339
M447	1A	532487758	0.039444227	0.319587629	99	0.117564881	0.159920295	1	36.20471657
M6347	3A	478681812	0.039597883	0.12371134	99	0.117564881	0.159852815	1	14.98810662
M6337	3A	345660743	0.039645628	0.422680412	99	0.117564881	0.159831904	1	20.38479491
M7487	3B	518153058	0.039649865	0.402061856	99	0.117564881	0.159830049	1	-19.07320481
M12645	6A	57957332	0.039725254	0.463917526	99	0.117564881	0.159797089	1	-16.07040453
M3604	2B	162967131	0.039766578	0.268041237	99	0.117564881	0.159779051	1	16.21257916
M13490	6B	640984009	0.039836996	0.309278351	99	0.117564881	0.159748358	1	-14.47937025
M10559	5B	10545039	0.039841399	0.484536082	99	0.117564881	0.159746441	1	-15.38967607
M1241	1B	124479537	0.039951565	0.06185567	99	0.117564881	0.159698546	1	-24.02803624
M10056	5A	473024901	0.04019546	0.350515464	99	0.117564881	0.159593012	1	-13.99303425
M14739	7A	346309172	0.040266196	0.484536082	99	0.117564881	0.159562532	1	-15.13985879
M6544	3A	501061731	0.040303453	0.24742268	99	0.117564881	0.159546501	1	-15.4041982
M10834	5B	417804694	0.040347592	0.082474227	99	0.117564881	0.15952753	1	-18.45652565
M3156	2A	757979334	0.040433948	0.278350515	99	0.117564881	0.159490477	1	-18.55306975
M116	1A	13940751	0.040449791	0.422680412	99	0.117564881	0.159483689	1	-12.48477386
M3601	2B	162967131	0.040644569	0.402061856	99	0.117564881	0.159400459	1	-15.40445411
M6041	3A	0	0.040688978	0.432989691	99	0.117564881	0.159381543	1	14.97418725
M4369	2B	0	0.040704989	0.268041237	99	0.117564881	0.159374729	1	13.47162497
M6435	3A	535005885	0.040720132	0.144329897	99	0.117564881	0.159368286	1	-21.17221797
M1537	1B	568960943	0.040738492	0.391752577	99	0.117564881	0.159360478	1	-11.33883355
M14296	7A	50589773	0.040784348	0.494845361	99	0.117564881	0.159340994	1	-14.74305413
M12485	6A	317623793	0.040824999	0.329896907	99	0.117564881	0.15932374	1	16.28135236
M2110	1D	276771068	0.040852121	0.237113402	99	0.117564881	0.15931224	1	15.8702036
M4960	2B	761846794	0.040881798	0.391752577	99	0.117564881	0.159299665	1	-13.95640774
M7979	3B	757950909	0.040993095	0.494845361	99	0.117564881	0.159252592	1	15.69572172
M1596	1B	587607110	0.041090684	0.288659794	99	0.117564881	0.159211429	1	-12.83075977
M1372	1B	405488003	0.041178315	0.298969072	99	0.117564881	0.159174555	1	15.5688898
M14221	7A	8870463	0.041220619	0.422680412	99	0.117564881	0.159156784	1	-19.52480103
M3276	2A	768676643	0.041425915	0.144329897	99	0.117564881	0.159070821	1	-16.68570116
M1046	1B	94011977	0.041487755	0.134020619	99	0.117564881	0.159045016	1	16.22330669
M5017	2B	766527144	0.04152461	0.350515464	99	0.117564881	0.159029656	1	-18.07969085
M11939	5D	581361090	0.041560385	0.329896907	99	0.117564881	0.159014761	1	32.58759411
M10110	5A	351863234	0.04162774	0.051546392	99	0.117564881	0.158986753	1	-27.28839207
M7283	3B	48788274	0.041690753	0.237113402	99	0.117564881	0.158960596	1	15.01167967
M15504	7B	605954397	0.041702447	0.237113402	99	0.117564881	0.158955746	1	13.55997286
M3794	2B	96381383	0.041728718	0.484536082	99	0.117564881	0.158944856	1	-17.56021702
M14136	7A	4013265	0.041732056	0.484536082	99	0.117564881	0.158943473	1	-11.25038652
M4361	2B	521346375	0.041805063	0.206185567	99	0.117564881	0.158913251	1	-14.95934893
M8758	4A	595433064	0.041825584	0.216494845	99	0.117564881	0.158904767	1	11.86487505
M11784	5B	682399214	0.041826376	0.051546392	99	0.117564881	0.158904439	1	-25.33308024
M1490	1B	555294084	0.041855968	0.257731959	99	0.117564881	0.158892212	1	-13.07565782
M6418	3A	512556910	0.041902738	0.12371134	99	0.117564881	0.158872906	1	18.20802577
M3393	2B	7067606	0.041932283	0.402061856	99	0.117564881	0.158860722	1	-23.20311212
M3398	2B	8748363	0.041932283	0.402061856	99	0.117564881	0.158860722	1	-23.20311212
M610	1A	573393055	0.04195164	0.041237113	99	0.117564881	0.158852745	1	-27.70182107
M6889	3B	43544653	0.04195497	0.463917526	99	0.117564881	0.158851373	1	-17.99881786
M10062	5A	469608194	0.042008211	0.082474227	99	0.117564881	0.158829453	1	-17.65928021
M3672	2B	43291957	0.042033343	0.443298969	99	0.117564881	0.158819116	1	-11.11409963
M10857	5B	43702204	0.042051709	0.422680412	99	0.117564881	0.158811567	1	-17.12464018
M2861	2A	562636225	0.042066157	0.453608247	99	0.117564881	0.15880563	1	-12.54102424
M9162	4A	708083352	0.042190409	0.113402062	99	0.117564881	0.158754665	1	-19.17518443
M2453	2A	277923449	0.042234895	0.391752577	99	0.117564881	0.158736457	1	15.59040646
M6137	3A	286518666	0.042400712	0.072164948	99	0.117564881	0.158668768	1	-17.27398025
M6429	3A	517095336	0.042405315	0.381443299	99	0.117564881	0.158666893	1	28.77111079
M1291	1B	394858638	0.042421002	0.340206186	99	0.117564881	0.158660505	1	43.93780507
M1504	1B	559332514	0.042439626	0.257731959	99	0.117564881	0.158652924	1	14.89090999
M11623	5B	595052151	0.042519853	0.350515464	99	0.117564881	0.158620308	1	-36.32056666
M6097	3A	140700735	0.04254138	0.422680412	99	0.117564881	0.158611568	1	17.76323446
M11080	5B	505694656	0.042556297	0.340206186	99	0.117564881	0.158605514	1	11.98364715
M5740	2D	607144225	0.042603102	0.257731959	99	0.117564881	0.158586533	1	-14.11001096
M6926	3B	8262440	0.042639855	0.484536082	99	0.117564881	0.158571645	1	14.31635065
M2598	2A	73531960	0.042703175	0.309278351	99	0.117564881	0.158546026	1	17.440907
M11228	5B	506961125	0.042839061	0.288659794	99	0.117564881	0.158491185	1	13.31539843
M11649	5B	600731527	0.042876596	0.020618557	99	0.117564881	0.158476069	1	38.43853426
M11668	5B	495035120	0.042876596	0.020618557	99	0.117564881	0.158476069	1	38.43853426
M13528	6B	29569629	0.042963809	0.06185567	99	0.117564881	0.158441002	1	-25.65696954
M7408	3B	73443935	0.043135073	0.113402062	99	0.117564881	0.158372361	1	17.39884037
M14755	7A	592045757	0.043168105	0.412371134	99	0.117564881	0.158359156	1	-20.62890891
M5105	2B	772149581	0.043185325	0.113402062	99	0.117564881	0.158352276	1	-18.26736401
M581	1A	0	0.043337684	0.195876289	99	0.117564881	0.158291532	1	15.0916296
M4603	2B	688434312	0.043344755	0.422680412	99	0.117564881	0.158288719	1	11.29287132
M6318	3A	321105083	0.043358607	0.474226804	99	0.117564881	0.158283209	1	-17.98305742
M11643	5B	600422955	0.043367692	0.391752577	99	0.117564881	0.158279596	1	12.83151844
M1709	1B	629304211	0.043403911	0.113402062	99	0.117564881	0.1582652	1	-15.70304623
M13912	6D	12019181	0.043412011	0.494845361	99	0.117564881	0.158261982	1	-14.95190223
M3782	2B	59124498	0.043459452	0.391752577	99	0.117564881	0.158243149	1	16.61684535
M666	1A	589629264	0.043597988	0.175257732	99	0.117564881	0.15818828	1	-13.95598363
M3925	2B	455051733	0.04362362	0.432989691	99	0.117564881	0.158178148	1	-11.01373846
M14288	7A	0	0.043818356	0.309278351	99	0.117564881	0.158101383	1	12.31752361
M2506	2A	419266894	0.043829847	0.494845361	99	0.117564881	0.158096865	1	13.0811799
M7575	3B	747801855	0.043972995	0.360824742	99	0.117564881	0.158040683	1	14.11584542
M12486	6A	317623793	0.044237223	0.164948454	99	0.117564881	0.157937495	1	-14.3211101
M7287	3B	50022030	0.044384515	0.443298969	99	0.117564881	0.15788026	1	-14.24312412
M6157	3A	575259106	0.044638215	0.309278351	99	0.117564881	0.157782152	1	-13.62917525
M2740	2A	451543116	0.044721596	0.226804124	99	0.117564881	0.157750038	1	-16.22810521
M11018	5B	454415439	0.044800871	0.412371134	99	0.117564881	0.157719565	1	-13.41905972
M6582	3A	659798154	0.044828887	0.237113402	99	0.117564881	0.15770881	1	-12.25601284
M8947	4A	91210964	0.044969889	0.494845361	99	0.117564881	0.157654788	1	11.32309125
M15320	7B	162339083	0.044987261	0.432989691	99	0.117564881	0.157648145	1	-20.01849022
M13479	6B	563122366	0.045126141	0.463917526	99	0.117564881	0.157595135	1	-15.25351189
M570	1A	657508038	0.04517129	0.329896907	99	0.117564881	0.15757794	1	11.43009299
M9206	4A	714142331	0.045215847	0.051546392	99	0.117564881	0.157560988	1	21.1470994
M1678	1B	599251551	0.045265125	0.360824742	99	0.117564881	0.157542261	1	27.53631911
M377	1A	500842238	0.045302405	0.391752577	99	0.117564881	0.157528108	1	21.43152297
M9941	5A	52738363	0.045497684	0.484536082	99	0.117564881	0.157454175	1	-12.84766517
M7137	3B	21184949	0.045750033	0.443298969	99	0.117564881	0.157359138	1	20.74217148
M2654	2A	85591214	0.045752464	0.082474227	99	0.117564881	0.157358225	1	20.65973875
M3772	2B	600752746	0.045952557	0.329896907	99	0.117564881	0.157283271	1	15.2849358
M15155	7A	729332254	0.04605296	0.340206186	99	0.117564881	0.157245792	1	27.09045585
M8035	3B	768723678	0.046113771	0.164948454	99	0.117564881	0.157223135	1	14.53930075
M12746	6A	609814795	0.046181749	0.24742268	99	0.117564881	0.157197845	1	11.97827416
M6724	3A	715199344	0.04625596	0.443298969	99	0.117564881	0.157170282	1	-11.20710642
M825	1B	28701051	0.046521238	0.474226804	99	0.117564881	0.157072141	1	-13.9396659
M46	1A	267772590	0.046601121	0.463917526	99	0.117564881	0.157042706	1	12.02695107
M15526	7B	742276351	0.046740602	0.082474227	99	0.117564881	0.156991439	1	20.29600217
M9540	4B	551047829	0.046750627	0.391752577	99	0.117564881	0.156987761	1	-21.4285216
M11410	5B	429304228	0.046769842	0.463917526	99	0.117564881	0.156980713	1	-14.73702973
M1741	1B	502110575	0.046874207	0.391752577	99	0.117564881	0.156942486	1	-12.29667842
M2204	1D	433140936	0.046956369	0.237113402	99	0.117564881	0.156912456	1	11.28900831
M8674	4A	232125986	0.047044939	0.340206186	99	0.117564881	0.156880147	1	-12.01681859
M11617	5B	601470987	0.047106561	0.402061856	99	0.117564881	0.156857706	1	13.76861719
M14301	7A	16978938	0.047268811	0.453608247	99	0.117564881	0.156798771	1	-12.77524668
M634	1A	481012178	0.047273869	0.422680412	99	0.117564881	0.156796938	1	11.32633754
M8830	4A	134596051	0.047415135	0.134020619	99	0.117564881	0.156745807	1	16.58480855
M3236	2A	0	0.047474073	0.237113402	99	0.117564881	0.156724523	1	16.23803013
M3578	2B	33729208	0.047639505	0.298969072	99	0.117564881	0.156664933	1	-14.31877292
M2314	1D	489968994	0.047645824	0.474226804	99	0.117564881	0.156662661	1	-14.15682552
M8512	3D	13151856	0.04776462	0.237113402	99	0.117564881	0.156620013	1	13.84473865
M5057	2B	764073687	0.04779143	0.278350515	99	0.117564881	0.156610404	1	14.53780189
M7422	3B	434047988	0.047797132	0.381443299	99	0.117564881	0.15660836	1	22.3249393
M5032	2B	562205678	0.047846767	0.268041237	99	0.117564881	0.156590588	1	-12.78748027
M3568	2B	31608031	0.048345007	0.309278351	99	0.117564881	0.156413275	1	-13.87570747
M4888	2B	562440272	0.048353387	0.432989691	99	0.117564881	0.15641031	1	-12.87053318
M4866	2B	613325684	0.048429469	0.463917526	99	0.117564881	0.156383411	1	11.42900367
M14302	7A	16978938	0.048461349	0.268041237	99	0.117564881	0.156372154	1	-12.76179067
M4764	2B	739389137	0.048488079	0.309278351	99	0.117564881	0.156362721	1	13.10445313
M6317	3A	321105083	0.048503805	0.298969072	99	0.117564881	0.156357174	1	-13.0663302
M3536	2B	717098488	0.048576642	0.484536082	99	0.117564881	0.156331508	1	-12.17564808
M3016	2A	715384273	0.048777859	0.113402062	99	0.117564881	0.156260818	1	15.54702033
M773	1B	89404769	0.048914269	0.195876289	99	0.117564881	0.156213073	1	13.9889288
M14196	7A	10111673	0.048928157	0.402061856	99	0.117564881	0.156208221	1	17.28158613
M10807	5B	378018637	0.048982992	0.082474227	99	0.117564881	0.156189074	1	-17.19948676
M2986	2A	568886852	0.049066349	0.432989691	99	0.117564881	0.156160013	1	-13.94034106
M14189	7A	20772971	0.049129034	0.030927835	99	0.117564881	0.156138193	1	29.37491972
M9895	5A	82132019	0.049403838	0.412371134	99	0.117564881	0.156042891	1	-18.79056075
M15206	7B	41039323	0.049447854	0.463917526	99	0.117564881	0.15602768	1	-14.71446514
M3875	2B	730608229	0.049624411	0.463917526	99	0.117564881	0.155966808	1	-15.04907589
M3943	2B	431969155	0.049707136	0.134020619	99	0.117564881	0.155938367	1	15.78654363
M12083	6A	0	0.049712505	0.402061856	99	0.117564881	0.155936523	1	11.80219251
M15580	7B	647131014	0.049740413	0.06185567	99	0.117564881	0.155926941	1	19.12890317
M15063	7A	715784906	0.049759218	0.06185567	99	0.117564881	0.155920487	1	24.05143595
M4890	2B	743311212	0.049842378	0.463917526	99	0.117564881	0.15589198	1	-13.07975254
M9910	5A	38118455	0.0499249	0.412371134	99	0.117564881	0.155863742	1	-14.36781066
M4452	2B	661452802	0.049940988	0.329896907	99	0.117564881	0.155858243	1	15.78581334
M14612	7A	106411744	0.050085523	0.474226804	99	0.117564881	0.155808922	1	-16.14290925
M7499	3B	248342512	0.050118713	0.154639175	99	0.117564881	0.155797618	1	-13.28024419
M5767	2D	26003239	0.050126719	0.453608247	99	0.117564881	0.155794893	1	-12.34115034
M15378	7B	468150485	0.050218508	0.432989691	99	0.117564881	0.155763678	1	17.61159471
M11042	5B	630923004	0.050251299	0.340206186	99	0.117564881	0.155752542	1	13.70241067
M3340	2A	766578300	0.050316054	0.06185567	99	0.117564881	0.155730573	1	-17.61960106
M3554	2B	0	0.050455635	0.422680412	99	0.117564881	0.155683322	1	-14.47939762
M2903	2A	502932671	0.050564461	0.412371134	99	0.117564881	0.155646579	1	11.45753269
M15443	7B	581922428	0.050589051	0.463917526	99	0.117564881	0.155638289	1	-18.21331677
M9646	4B	660656439	0.050594317	0.164948454	99	0.117564881	0.155636514	1	-14.39046064
M4059	2B	155155728	0.050600821	0.484536082	99	0.117564881	0.155634322	1	13.67920055
M10061	5A	469608194	0.050655363	0.391752577	99	0.117564881	0.155615954	1	-20.05173301
M3970	2B	227089235	0.050662073	0.391752577	99	0.117564881	0.155613695	1	15.88425958
M7675	3B	154191322	0.050906787	0.453608247	99	0.117564881	0.155531553	1	-15.13809326
M6309	3A	0	0.051000319	0.195876289	99	0.117564881	0.15550027	1	-17.23774711
M6771	3A	0	0.051053536	0.154639175	99	0.117564881	0.155482498	1	-15.379996
M3567	2B	31608031	0.051093152	0.288659794	99	0.117564881	0.155469281	1	14.25614264
M4773	2B	732350878	0.051132027	0.432989691	99	0.117564881	0.155456323	1	17.3431755
M1560	1B	685243263	0.051486871	0.051546392	99	0.117564881	0.155338525	1	25.8178362
M6163	3A	403940047	0.051513603	0.350515464	99	0.117564881	0.155329686	1	-12.46084084
M484	1A	540712899	0.051579404	0.494845361	99	0.117564881	0.15530795	1	16.75725677
M894	1B	178656968	0.051624287	0.443298969	99	0.117564881	0.155293141	1	-13.65486373
M6313	3A	69503671	0.051634295	0.030927835	99	0.117564881	0.155289841	1	25.98326113
M3545	2B	824552561	0.05166476	0.432989691	99	0.117564881	0.155279799	1	14.93433521
M109	1A	0	0.051673291	0.453608247	99	0.117564881	0.155276988	1	14.73175128
M4838	2B	745683074	0.051731219	0.237113402	99	0.117564881	0.155257915	1	-11.61672706
M13845	6B	0	0.051930181	0.257731959	99	0.117564881	0.15519258	1	13.64853121
M9645	4B	660656439	0.051954793	0.175257732	99	0.117564881	0.155184517	1	15.90482799
M9648	4B	658205308	0.051954793	0.175257732	99	0.117564881	0.155184517	1	15.90482799
M7582	3B	410716788	0.051980548	0.453608247	99	0.117564881	0.155176084	1	12.27208223
M5229	2B	645000730	0.052117685	0.06185567	99	0.117564881	0.155131254	1	19.04862752
M1065	1B	121061272	0.052182169	0.278350515	99	0.117564881	0.155110219	1	12.13496726
M8211	3B	826559040	0.052416049	0.494845361	99	0.117564881	0.155034158	1	16.27306705
M7252	3B	26642568	0.052622906	0.432989691	99	0.117564881	0.15496719	1	-10.37975395
M7009	3B	15335353	0.052633987	0.329896907	99	0.117564881	0.15496361	1	14.19604143
M12190	6A	9461899	0.052676772	0.360824742	99	0.117564881	0.154949798	1	-15.57760277
M10039	5A	441478599	0.052721051	0.402061856	99	0.117564881	0.154935515	1	11.00875132
M9545	4B	526943141	0.052734974	0.329896907	99	0.117564881	0.154931027	1	15.59822526
M7262	3B	47202036	0.052921533	0.257731959	99	0.117564881	0.15487101	1	16.87897027
M6360	3A	480442075	0.052969564	0.432989691	99	0.117564881	0.154855595	1	-13.90395918
M529	1A	534768642	0.053013263	0.443298969	99	0.117564881	0.154841583	1	-13.47513116
M10942	5B	450372760	0.053078428	0.381443299	99	0.117564881	0.154820712	1	11.5883475
M10011	5A	389726004	0.053164844	0.453608247	99	0.117564881	0.154793077	1	-14.54042153
M5054	2B	0	0.053226378	0.474226804	99	0.117564881	0.154773429	1	-20.81604058
M2989	2A	715223908	0.053265037	0.350515464	99	0.117564881	0.154761097	1	-11.6014104
M4994	2B	0	0.053356441	0.360824742	99	0.117564881	0.154731978	1	18.11572611
M11839	5B	621241019	0.053358472	0.350515464	99	0.117564881	0.154731332	1	-36.60741475
M9624	4B	0	0.053391431	0.319587629	99	0.117564881	0.154720846	1	14.15201418
M9399	4A	5381823	0.053399145	0.391752577	99	0.117564881	0.154718392	1	-12.03787327
M2461	2A	448401210	0.053439538	0.463917526	99	0.117564881	0.154705553	1	-23.77052101
M2089	1D	258583131	0.053439538	0.463917526	99	0.117564881	0.154705553	1	23.77052101
M2333	2A	2727484	0.053439538	0.463917526	99	0.117564881	0.154705553	1	23.77052101
M1288	1B	462987278	0.053455155	0.072164948	99	0.117564881	0.154700591	1	18.62999194
M11154	5B	44575313	0.053541467	0.319587629	99	0.117564881	0.154673199	1	-13.74165825
M7753	3B	420365956	0.053573761	0.154639175	99	0.117564881	0.154662962	1	12.82297243
M5747	2D	593851647	0.053724404	0.494845361	99	0.117564881	0.154615298	1	16.52000752
M6487	3A	598916422	0.05373079	0.453608247	99	0.117564881	0.154613281	1	-11.92375462
M14825	7A	644848734	0.053731944	0.422680412	99	0.117564881	0.154612916	1	-16.62414968
M3520	2B	0	0.053791564	0.216494845	99	0.117564881	0.154594095	1	11.56737153
M5243	2B	796598273	0.053834461	0.298969072	99	0.117564881	0.154580567	1	-20.9205525
M3133	2A	633678135	0.053883594	0.329896907	99	0.117564881	0.154565086	1	-19.13389685
M8940	4A	673929919	0.053955504	0.175257732	99	0.117564881	0.154542456	1	-12.56730772
M5273	2B	799057190	0.054024508	0.051546392	99	0.117564881	0.154520772	1	-23.35360368
M14914	7A	699146276	0.054080282	0.134020619	99	0.117564881	0.154503267	1	-15.56200793
M411	1A	509033606	0.054276387	0.381443299	99	0.117564881	0.154441871	1	-18.25994379
M12050	6A	5124270	0.05440774	0.041237113	99	0.117564881	0.154400882	1	24.33309089
M2501	2A	36404881	0.054445589	0.402061856	99	0.117564881	0.154389091	1	18.43500303
M4777	2B	739568493	0.054525325	0.381443299	99	0.117564881	0.154364279	1	-14.40528126
M5290	2B	796598273	0.05454722	0.072164948	99	0.117564881	0.154357473	1	19.63332348
M5308	2B	799254327	0.054586715	0.278350515	99	0.117564881	0.154345203	1	-17.43916579
M4193	2B	674740371	0.054696049	0.474226804	99	0.117564881	0.154311286	1	14.64190122
M7296	3B	67787098	0.054698125	0.412371134	99	0.117564881	0.154310643	1	13.95591149
M6409	3A	397200871	0.054757436	0.092783505	99	0.117564881	0.154292275	1	-25.31485812
M13704	6B	708228121	0.054763572	0.072164948	99	0.117564881	0.154290376	1	20.62743907
M9547	4B	557995494	0.055008818	0.381443299	99	0.117564881	0.154214663	1	11.96889219
M3556	2B	29045988	0.055199661	0.453608247	99	0.117564881	0.154155998	1	-11.25451793
M15056	7A	0	0.05525505	0.391752577	99	0.117564881	0.154139012	1	-22.96006431
M10810	5B	408227848	0.055299326	0.412371134	99	0.117564881	0.154125447	1	16.70175233
M2243	1D	462948307	0.055310423	0.463917526	99	0.117564881	0.154122049	1	-24.00105912
M2651	2A	609023391	0.055451473	0.206185567	99	0.117564881	0.154078924	1	-13.13559975
M1468	1B	0	0.055525444	0.164948454	99	0.117564881	0.154056355	1	14.67205085
M1038	1B	92259228	0.055671256	0.072164948	99	0.117564881	0.154011961	1	-17.19870016
M6617	3A	688594260	0.055735351	0.412371134	99	0.117564881	0.153992487	1	17.51932805
M12678	6A	584911912	0.055919094	0.494845361	99	0.117564881	0.153936792	1	11.52915197
M9232	4A	26495448	0.05592366	0.422680412	99	0.117564881	0.153935411	1	9.936933317
M13920	6D	12435844	0.056034392	0.309278351	99	0.117564881	0.153901945	1	-12.34732294
M1045	1B	94011977	0.056054078	0.329896907	99	0.117564881	0.153896003	1	-14.55703326
M15434	7B	495182089	0.056160327	0.12371134	99	0.117564881	0.153863971	1	17.36535733
M2924	2A	691480240	0.056174668	0.144329897	99	0.117564881	0.153859653	1	-13.64686479
M11584	5B	586524432	0.05620732	0.278350515	99	0.117564881	0.153849825	1	13.94348962
M7698	3B	669426645	0.056308145	0.360824742	99	0.117564881	0.153819516	1	25.55075595
M2467	2A	21465723	0.056342325	0.484536082	99	0.117564881	0.153809255	1	26.85950292
M15482	7B	0	0.056357352	0.329896907	99	0.117564881	0.153804746	1	-12.67910589
M10874	5B	431870071	0.056388217	0.164948454	99	0.117564881	0.153795488	1	-13.2721545
M14312	7A	455466428	0.056661108	0.340206186	99	0.117564881	0.153713873	1	15.80045827
M10070	5A	470194570	0.057082618	0.463917526	99	0.117564881	0.153588641	1	-12.687191
M65	1A	542326485	0.057083994	0.402061856	99	0.117564881	0.153588233	1	-10.70487073
M4151	2B	95129435	0.057094526	0.103092784	99	0.117564881	0.153585117	1	18.30588007
M539	1A	701043681	0.057139043	0.412371134	99	0.117564881	0.153571952	1	14.1257249
M553	1A	623968684	0.057139043	0.412371134	99	0.117564881	0.153571952	1	14.1257249
M5936	2D	747238713	0.057220862	0.350515464	99	0.117564881	0.153547785	1	31.77020983
M13809	6B	715219837	0.057330252	0.494845361	99	0.117564881	0.153515532	1	15.98637599
M11043	5B	492093143	0.057343412	0.443298969	99	0.117564881	0.153511657	1	-16.19535954
M14424	7A	35387463	0.057391545	0.463917526	99	0.117564881	0.15349749	1	14.28822494
M7210	3B	130618089	0.057511348	0.432989691	99	0.117564881	0.153462283	1	-12.74128975
M15057	7A	708435522	0.057517943	0.237113402	99	0.117564881	0.153460348	1	13.44136256
M7122	3B	25942617	0.057669717	0.226804124	99	0.117564881	0.153415866	1	-12.53729017
M527	1A	534836196	0.05772556	0.463917526	99	0.117564881	0.153399531	1	12.22644984
M1619	1B	603262258	0.057775718	0.494845361	99	0.117564881	0.153384874	1	14.65618845
M14055	6D	446477288	0.057781695	0.371134021	99	0.117564881	0.153383128	1	-10.77058195
M7026	3B	15100130	0.057931507	0.474226804	99	0.117564881	0.153339436	1	-10.02256435
M11821	5B	34137545	0.057950416	0.381443299	99	0.117564881	0.15333393	1	23.63607457
M4507	2B	690747730	0.057990586	0.474226804	99	0.117564881	0.15332224	1	13.2208681
M1763	1B	639941356	0.058026258	0.391752577	99	0.117564881	0.153311866	1	-18.571605
M5748	2D	593851647	0.058039237	0.484536082	99	0.117564881	0.153308093	1	-16.16323283
M906	1B	210395910	0.058195981	0.422680412	99	0.117564881	0.153262602	1	-11.36229217
M2035	1D	21254198	0.058201531	0.422680412	99	0.117564881	0.153260993	1	12.35568543
M2732	2A	179992753	0.058204217	0.134020619	99	0.117564881	0.153260215	1	23.9422205
M13491	6B	641150463	0.058294362	0.484536082	99	0.117564881	0.153234116	1	-15.62154532
M3575	2B	33729208	0.058364744	0.422680412	99	0.117564881	0.15321377	1	14.18703161
M3586	2B	40530085	0.058393362	0.288659794	99	0.117564881	0.153205504	1	11.37591094
M9647	4B	658205308	0.058399945	0.494845361	99	0.117564881	0.153203603	1	15.43695469
M10167	5A	496610220	0.058427788	0.154639175	99	0.117564881	0.153195567	1	-16.57779027
M5409	2D	20358088	0.058460609	0.257731959	99	0.117564881	0.153186099	1	-12.64611089
M3703	2B	66559474	0.058602185	0.319587629	99	0.117564881	0.153145323	1	-16.38723317
M11664	5B	0	0.05864401	0.278350515	99	0.117564881	0.153133298	1	12.70238016
M13754	6B	713669152	0.058670396	0.494845361	99	0.117564881	0.153125716	1	-14.43679823
M6104	3A	18171651	0.058875742	0.164948454	99	0.117564881	0.153066837	1	-16.49638573
M7131	3B	24940760	0.05891197	0.144329897	99	0.117564881	0.153056472	1	13.71246865
M5159	2B	782126877	0.058939014	0.278350515	99	0.117564881	0.15304874	1	-11.93674626
M4755	2B	727221588	0.058987335	0.463917526	99	0.117564881	0.153034933	1	16.43063293
M382	1A	504702998	0.059121852	0.06185567	99	0.117564881	0.152996562	1	-17.94831627
M7111	3B	22453000	0.059135425	0.195876289	99	0.117564881	0.152992695	1	-14.04016378
M14737	7A	542907733	0.059235891	0.329896907	99	0.117564881	0.152964106	1	11.12069701
M7193	3B	35451949	0.059296728	0.350515464	99	0.117564881	0.152946819	1	-10.20719154
M2519	2A	34350090	0.059306382	0.371134021	99	0.117564881	0.152944077	1	-11.44754855
M8492	3D	115087655	0.059324405	0.474226804	99	0.117564881	0.15293896	1	-13.95143871
M5129	2B	221893152	0.059395423	0.278350515	99	0.117564881	0.152918815	1	-10.35869725
M1094	1B	180406792	0.059483904	0.195876289	99	0.117564881	0.152893752	1	13.47685044
M5223	2B	635759512	0.059587488	0.432989691	99	0.117564881	0.152864463	1	12.59083427
M5965	2D	27005186	0.059621592	0.350515464	99	0.117564881	0.152854832	1	15.22572709
M5655	2D	142549111	0.059660878	0.340206186	99	0.117564881	0.152843745	1	14.64210624
M2565	2A	51261955	0.0596778	0.278350515	99	0.117564881	0.152838972	1	-17.32872325
M6787	3A	519467461	0.059682356	0.06185567	99	0.117564881	0.152837687	1	18.75367028
M5401	2D	319705897	0.059706834	0.164948454	99	0.117564881	0.152830785	1	-12.10009886
M13563	6B	663760681	0.059799943	0.041237113	99	0.117564881	0.152804562	1	-25.90498481
M276	1A	397669794	0.059819991	0.020618557	99	0.117564881	0.152798921	1	-28.26797361
M2899	2A	49655671	0.059868777	0.432989691	99	0.117564881	0.152785203	1	12.40855569
M6014	2D	0	0.059995319	0.092783505	99	0.117564881	0.152749678	1	14.91871965
M9041	4A	649432920	0.060001592	0.340206186	99	0.117564881	0.152747919	1	15.52924638
M4854	2B	748703470	0.060088559	0.474226804	99	0.117564881	0.152723554	1	12.6023618
M14420	7A	34920067	0.060193554	0.164948454	99	0.117564881	0.152694189	1	-17.91189194
M2688	2A	729311539	0.06026362	0.216494845	99	0.117564881	0.152674623	1	-16.61357736
M13777	6B	471345155	0.060340573	0.298969072	99	0.117564881	0.152653163	1	11.64129561
M10045	5A	454808313	0.060353147	0.288659794	99	0.117564881	0.15264966	1	14.81125264
M11015	5B	485806429	0.0603702	0.371134021	99	0.117564881	0.152644909	1	-10.4477443
M14255	7A	0	0.0604356	0.340206186	99	0.117564881	0.152626704	1	40.52243597
M2518	2A	33343837	0.060617652	0.113402062	99	0.117564881	0.152576138	1	-13.04931325
M9852	5A	9210215	0.060656677	0.164948454	99	0.117564881	0.15256532	1	13.78216256
M5942	2D	625109798	0.060666231	0.432989691	99	0.117564881	0.152562673	1	11.12271981
M1221	1B	0	0.060834278	0.432989691	99	0.117564881	0.152516184	1	-22.89988593
M14884	7A	674759987	0.060890116	0.020618557	99	0.117564881	0.152500767	1	27.17579423
M405	1A	343061677	0.06095887	0.443298969	99	0.117564881	0.152481805	1	-10.7285228
M1077	1B	484923519	0.061037493	0.340206186	99	0.117564881	0.15246015	1	14.40230346
M5811	2D	588737228	0.06116224	0.412371134	99	0.117564881	0.152425853	1	-13.95647219
M1456	1B	485555813	0.061278244	0.278350515	99	0.117564881	0.152394028	1	-14.73439819
M119	1A	21638580	0.061425754	0.422680412	99	0.117564881	0.152353653	1	-14.22859878
M4963	2B	753796374	0.061443695	0.391752577	99	0.117564881	0.152348749	1	13.2442161
M5838	2D	596252327	0.061485773	0.371134021	99	0.117564881	0.152337255	1	-11.2034972
M3557	2B	19611130	0.061718862	0.432989691	99	0.117564881	0.152273737	1	13.44233715
M13310	6B	262401776	0.061769915	0.484536082	99	0.117564881	0.15225986	1	13.16754778
M2258	1D	471927480	0.061806468	0.216494845	99	0.117564881	0.152249931	1	13.854891
M3991	2B	47587295	0.061830179	0.216494845	99	0.117564881	0.152243494	1	14.19480278
M10090	5A	461901240	0.061850854	0.463917526	99	0.117564881	0.152237884	1	13.85984727
M15100	7A	720585870	0.061868551	0.144329897	99	0.117564881	0.152233083	1	18.17854221
M4401	2B	565074839	0.062008173	0.195876289	99	0.117564881	0.152195259	1	13.87858183
M1829	1B	475449961	0.0622872	0.360824742	99	0.117564881	0.152119945	1	-10.14874811
M4223	2B	208215441	0.062340302	0.268041237	99	0.117564881	0.152105654	1	-13.93342819
M15562	7B	599219675	0.062428507	0.329896907	99	0.117564881	0.152081944	1	15.75093721
M6744	3A	716253361	0.062472146	0.278350515	99	0.117564881	0.152070227	1	10.28211122
M1392	1B	499899181	0.062622987	0.319587629	99	0.117564881	0.152029794	1	11.9909782
M2999	2A	713536628	0.062624683	0.422680412	99	0.117564881	0.15202934	1	-14.25218403
M13764	6B	0	0.062665079	0.453608247	99	0.117564881	0.152018531	1	-14.52227306
M14675	7A	191173951	0.062899685	0.237113402	99	0.117564881	0.151955901	1	13.54143809
M6057	3A	8862385	0.062905124	0.195876289	99	0.117564881	0.151954451	1	-12.11484135
M9497	4B	455378553	0.063081882	0.134020619	99	0.117564881	0.151907436	1	-16.67855105
M9191	4A	705378018	0.063112902	0.164948454	99	0.117564881	0.1518992	1	19.40499116
M8706	4A	25985745	0.063121971	0.051546392	99	0.117564881	0.151896792	1	-20.52170867
M3940	2B	503351516	0.063283789	0.402061856	99	0.117564881	0.151853905	1	15.21319135
M7694	3B	684619731	0.063445962	0.134020619	99	0.117564881	0.151811043	1	13.88279443
M5338	2B	789493633	0.063480872	0.030927835	99	0.117564881	0.151801832	1	24.17275727
M4932	2B	752403414	0.063582763	0.391752577	99	0.117564881	0.151774979	1	11.99528335
M719	1B	6072803	0.063599894	0.422680412	99	0.117564881	0.151770469	1	-12.52424183
M1380	1B	444421058	0.063652022	0.164948454	99	0.117564881	0.151756753	1	16.84727962
M4967	2B	765220771	0.063669059	0.216494845	99	0.117564881	0.151752273	1	11.28303566
M1682	1B	619588077	0.063694065	0.06185567	99	0.117564881	0.151745699	1	-18.23758618
M9778	4D	450148197	0.063760009	0.072164948	99	0.117564881	0.151728378	1	-18.51391114
M1638	1B	601383349	0.06379999	0.103092784	99	0.117564881	0.151717885	1	-14.56739721
M3773	2B	115645238	0.063845339	0.360824742	99	0.117564881	0.151705993	1	15.23202194
M7320	3B	44728934	0.063850626	0.453608247	99	0.117564881	0.151704607	1	14.12264782
M4346	2B	157114323	0.063882408	0.257731959	99	0.117564881	0.151696279	1	13.04062062
M11528	5B	562983853	0.063906119	0.288659794	99	0.117564881	0.151690068	1	-13.45476832
M11752	5B	679651559	0.063981144	0.391752577	99	0.117564881	0.151670434	1	-17.09500086
M12382	6A	0	0.064096507	0.319587629	99	0.117564881	0.151640291	1	-14.00045433
M1473	1B	0	0.064173623	0.432989691	99	0.117564881	0.151620175	1	-10.47586909
M2278	1D	486387816	0.064246949	0.381443299	99	0.117564881	0.151601072	1	11.38882061
M1567	1B	592833254	0.064287391	0.360824742	99	0.117564881	0.151590546	1	-17.52414396
M2649	2A	598418775	0.064376038	0.412371134	99	0.117564881	0.151567498	1	-16.66107018
M2521	2A	0	0.064463797	0.422680412	99	0.117564881	0.151544715	1	-16.77477023
M8912	4A	32202337	0.064469751	0.051546392	99	0.117564881	0.151543171	1	17.43546208
M2706	2A	417084357	0.064533105	0.463917526	99	0.117564881	0.151526746	1	21.33555849
M4692	2B	717237714	0.064534693	0.340206186	99	0.117564881	0.151526335	1	11.92536063
M15102	7A	720585870	0.064660881	0.041237113	99	0.117564881	0.151493674	1	23.40556888
M1572	1B	724589345	0.064720246	0.381443299	99	0.117564881	0.151478332	1	-11.76918447
M11815	5B	0	0.064744326	0.443298969	99	0.117564881	0.151472113	1	18.16567491
M12183	6A	625246005	0.064875857	0.298969072	99	0.117564881	0.15143819	1	14.48258003
M12283	6A	0	0.064895367	0.360824742	99	0.117564881	0.151433165	1	-24.83599972
M2911	2A	676994096	0.065031793	0.298969072	99	0.117564881	0.151398069	1	34.17140004
M4759	2B	0	0.065033523	0.432989691	99	0.117564881	0.151397625	1	-16.67835212
M13	1A	0	0.065040126	0.432989691	99	0.117564881	0.151395928	1	9.350753938
M11789	5B	687326007	0.065275579	0.381443299	99	0.117564881	0.151335554	1	-21.42826636
M9428	4A	733792535	0.065287242	0.329896907	99	0.117564881	0.15133257	1	13.1348478
M13720	6B	0	0.065292271	0.18556701	99	0.117564881	0.151331283	1	-13.00825689
M3093	2A	0	0.065331597	0.484536082	99	0.117564881	0.151321225	1	13.52376016
M3608	2B	43237442	0.065352567	0.268041237	99	0.117564881	0.151315865	1	-13.5519428
M13779	6B	558266479	0.065420555	0.484536082	99	0.117564881	0.151298498	1	13.46233744
M3740	2B	72162639	0.065615399	0.206185567	99	0.117564881	0.151248835	1	-13.62557598
M6886	3B	0	0.065619091	0.371134021	99	0.117564881	0.151247895	1	11.66131296
M7130	3B	25803087	0.065638532	0.257731959	99	0.117564881	0.151242949	1	12.57051819
M9965	5A	380823807	0.065952841	0.175257732	99	0.117564881	0.151163203	1	13.61844301
M4916	2B	759189621	0.065964434	0.340206186	99	0.117564881	0.151160269	1	-14.9036085
M3812	2B	63706836	0.066112398	0.24742268	99	0.117564881	0.151122878	1	-14.33507591
M12204	6A	11569432	0.066124094	0.072164948	99	0.117564881	0.151119926	1	18.69818918
M6373	3A	32513740	0.06615955	0.453608247	99	0.117564881	0.151110982	1	14.7329451
M12003	5D	552729543	0.066175423	0.412371134	99	0.117564881	0.151106979	1	-9.225983203
M2747	2A	507314141	0.066242199	0.432989691	99	0.117564881	0.151090151	1	15.67832635
M3775	2B	0	0.066243249	0.298969072	99	0.117564881	0.151089887	1	11.8054678
M13045	6B	27984992	0.066302992	0.360824742	99	0.117564881	0.151074848	1	12.30399522
M9230	4A	14039828	0.066313996	0.484536082	99	0.117564881	0.151072079	1	-9.28756617
M10884	5B	520209151	0.066371981	0.309278351	99	0.117564881	0.151057499	1	-12.59333341
M15559	7B	215030611	0.066476479	0.06185567	99	0.117564881	0.151031259	1	20.99679269
M4044	2B	250520151	0.066503942	0.237113402	99	0.117564881	0.15102437	1	12.64911635
M12024	5D	257171245	0.066591589	0.402061856	99	0.117564881	0.151002405	1	-13.67910108
M1385	1B	508708850	0.06680224	0.381443299	99	0.117564881	0.150949743	1	-22.19130881
M12524	6A	69225171	0.066825778	0.350515464	99	0.117564881	0.15094387	1	-11.91551178
M4019	2B	678547100	0.066864962	0.268041237	99	0.117564881	0.150934098	1	11.46952172
M3993	2B	543306948	0.066944672	0.391752577	99	0.117564881	0.150914238	1	-21.83970651
M4826	2B	749922381	0.066946563	0.268041237	99	0.117564881	0.150913767	1	-13.14047684
M927	1B	198637739	0.066989263	0.216494845	99	0.117564881	0.150903139	1	-16.371859
M4202	2B	562512178	0.066998785	0.103092784	99	0.117564881	0.15090077	1	15.94317007
M5392	2D	0	0.067076896	0.12371134	99	0.117564881	0.150881351	1	-15.0525975
M7121	3B	25942617	0.067166752	0.360824742	99	0.117564881	0.150859042	1	-14.66769275
M5281	2B	549670301	0.067249771	0.051546392	99	0.117564881	0.150838459	1	24.7893941
M710	1B	3569552	0.067256797	0.216494845	99	0.117564881	0.150836718	1	13.87017729
M9166	4A	710830242	0.067295296	0.164948454	99	0.117564881	0.150827184	1	-12.86370657
M34	1A	3982825	0.067388752	0.082474227	99	0.117564881	0.150804063	1	15.19013195
M14397	7A	30008958	0.067428955	0.474226804	99	0.117564881	0.150794128	1	-14.02615781
M8462	3D	150762205	0.067659144	0.144329897	99	0.117564881	0.150737366	1	14.67428649
M10189	5A	503430449	0.067771448	0.226804124	99	0.117564881	0.150709749	1	-12.83860427
M9327	4A	8252743	0.067842831	0.278350515	99	0.117564881	0.150692221	1	-11.75991219
M14982	7A	566622348	0.067853754	0.288659794	99	0.117564881	0.150689541	1	11.43130965
M3814	2B	99767221	0.067910864	0.12371134	99	0.117564881	0.150675534	1	14.71287534
M2921	2A	16885170	0.068056773	0.371134021	99	0.117564881	0.150639808	1	-12.35100208
M5509	2D	0	0.068085236	0.164948454	99	0.117564881	0.150632848	1	-15.06737928
M14991	7A	711171415	0.068146988	0.360824742	99	0.117564881	0.15061776	1	29.30351977
M740	1B	7160074	0.068158069	0.443298969	99	0.117564881	0.150615054	1	14.53500273
M282	1A	288103561	0.068284159	0.402061856	99	0.117564881	0.150584297	1	18.56751788
M4057	2B	344404616	0.068421209	0.309278351	99	0.117564881	0.150550936	1	10.02688702
M1352	1B	378833974	0.068551385	0.226804124	99	0.117564881	0.150519316	1	-11.0776291
M11838	5B	703289576	0.068552693	0.020618557	99	0.117564881	0.150518999	1	34.37600418
M5108	2B	0	0.068552693	0.020618557	99	0.117564881	0.150518999	1	34.37600418
M12575	6A	524836376	0.068672533	0.391752577	99	0.117564881	0.150489948	1	-19.29470643
M9335	4A	0	0.068813446	0.237113402	99	0.117564881	0.150455859	1	-10.90174865
M15316	7B	328973458	0.068828216	0.391752577	99	0.117564881	0.150452291	1	18.44953715
M3282	2A	773395688	0.068893758	0.082474227	99	0.117564881	0.150436465	1	-16.87227817
M10272	5A	548999062	0.068896543	0.319587629	99	0.117564881	0.150435792	1	-14.091946
M14708	7A	633293129	0.068940211	0.175257732	99	0.117564881	0.150425258	1	-16.00501882
M9568	4B	441057932	0.068948973	0.422680412	99	0.117564881	0.150423145	1	-10.37750841
M227	1A	256281584	0.068975557	0.371134021	99	0.117564881	0.150416736	1	-11.30171262
M7809	3B	544414886	0.069090274	0.072164948	99	0.117564881	0.150389111	1	19.10311457
M346	1A	486815863	0.069140543	0.12371134	99	0.117564881	0.150377022	1	15.51740007
M6268	3A	41617458	0.069214828	0.195876289	99	0.117564881	0.150359174	1	-13.65827191
M4732	2B	712361439	0.069221731	0.484536082	99	0.117564881	0.150357516	1	12.15724713
M4824	2B	737047306	0.069305119	0.309278351	99	0.117564881	0.150337509	1	-11.1859377
M3845	2B	136811320	0.069327949	0.412371134	99	0.117564881	0.150332035	1	-13.99259743
M9138	4A	23511186	0.069333796	0.092783505	99	0.117564881	0.150330634	1	18.40338232
M15117	7A	0	0.069363697	0.474226804	99	0.117564881	0.150323469	1	-17.90982786
M1637	1B	601383349	0.069468827	0.484536082	99	0.117564881	0.150298305	1	11.67133075
M7763	3B	537558624	0.069542058	0.432989691	99	0.117564881	0.150280801	1	-13.55379591
M10025	5A	48673396	0.06970784	0.319587629	99	0.117564881	0.150241248	1	-12.02481789
M14964	7A	477189698	0.070000645	0.24742268	99	0.117564881	0.15017164	1	15.04723845
M6122	3A	15836070	0.070005746	0.144329897	99	0.117564881	0.15017043	1	-13.89189491
M1632	1B	587501291	0.070085744	0.206185567	99	0.117564881	0.150151469	1	12.15134303
M7687	3B	0	0.070096094	0.443298969	99	0.117564881	0.150149018	1	-15.47180649
M11544	5B	194318754	0.070211502	0.298969072	99	0.117564881	0.15012171	1	17.93544409
M14276	7A	13189977	0.07025754	0.443298969	99	0.117564881	0.15011083	1	-14.45622569
M3709	2B	79312880	0.070296597	0.494845361	99	0.117564881	0.150101606	1	-10.2335373
M4443	2B	661444855	0.070445766	0.309278351	99	0.117564881	0.150066428	1	14.12541448
M1627	1B	144111278	0.070624862	0.432989691	99	0.117564881	0.150024299	1	17.26751158
M8970	4A	649885889	0.070746872	0.412371134	99	0.117564881	0.149995665	1	-11.83444596
M14774	7A	617608282	0.070801236	0.422680412	99	0.117564881	0.149982924	1	-13.4052236
M4700	2B	728611163	0.070932733	0.257731959	99	0.117564881	0.14995215	1	-10.55495597
M12174	6A	463504033	0.070984343	0.484536082	99	0.117564881	0.149940089	1	-17.17930975
M1722	1B	460796746	0.071040986	0.06185567	99	0.117564881	0.149926862	1	19.2052776
M13207	6B	125162531	0.071050284	0.082474227	99	0.117564881	0.149924692	1	16.92838711
M4340	2B	422190933	0.071082268	0.164948454	99	0.117564881	0.14991723	1	-11.74453274
M1787	1B	608599570	0.071128842	0.041237113	99	0.117564881	0.14990637	1	-22.09331101
M4187	2B	374802883	0.071184379	0.144329897	99	0.117564881	0.14989343	1	15.5312947
M10971	5B	773169641	0.071279002	0.12371134	99	0.117564881	0.149871409	1	17.23019309
M1601	1B	591090372	0.071298896	0.309278351	99	0.117564881	0.149866783	1	11.11383493
M3971	2B	128269909	0.071319976	0.319587629	99	0.117564881	0.149861883	1	12.13151326
M12324	6A	19266268	0.071359022	0.010309278	99	0.117564881	0.149852811	1	-42.86360961
M3603	2B	162967131	0.071359022	0.010309278	99	0.117564881	0.149852811	1	-42.86360961
M12318	6A	17587956	0.071359022	0.010309278	99	0.117564881	0.149852811	1	42.86360961
M13879	6D	5046755	0.071359022	0.010309278	99	0.117564881	0.149852811	1	42.86360961
M1762	1B	639941356	0.071359022	0.010309278	99	0.117564881	0.149852811	1	42.86360961
M4156	2B	107028709	0.071382202	0.257731959	99	0.117564881	0.149847428	1	-11.87338907
M11362	5B	180679040	0.071453995	0.206185567	99	0.117564881	0.149830768	1	-11.65026946
M14261	7A	0	0.071582628	0.443298969	99	0.117564881	0.149800962	1	-15.52788345
M182	1A	344675281	0.071633259	0.412371134	99	0.117564881	0.149789247	1	10.43398789
M6231	3A	305876520	0.071713058	0.329896907	99	0.117564881	0.1497708	1	10.48409052
M14321	7A	41580720	0.071720216	0.402061856	99	0.117564881	0.149769147	1	-13.39171961
M10057	5A	469516830	0.071854689	0.371134021	99	0.117564881	0.149738115	1	-12.32243745
M4910	2B	64103817	0.071890765	0.371134021	99	0.117564881	0.149729801	1	-15.3346652
M15440	7B	238950412	0.071900921	0.144329897	99	0.117564881	0.149727462	1	-15.01537477
M13039	6B	0	0.071939276	0.072164948	99	0.117564881	0.149718629	1	15.43668708
M11665	5B	609899764	0.072018532	0.350515464	99	0.117564881	0.149700392	1	-9.695009625
M6766	3A	484068846	0.07213344	0.12371134	99	0.117564881	0.149673992	1	-14.67085234
M8911	4A	32202337	0.072156153	0.340206186	99	0.117564881	0.149668779	1	-18.37965183
M7462	3B	282944591	0.072222159	0.298969072	99	0.117564881	0.14965364	1	-10.05724751
M7300	3B	19380506	0.072293767	0.24742268	99	0.117564881	0.149637232	1	12.64526922
M8092	3B	808502629	0.072653461	0.319587629	99	0.117564881	0.149555085	1	11.43048797
M12383	6A	33024564	0.072733226	0.020618557	99	0.117564881	0.149536929	1	32.65010046
M1666	1B	588503113	0.072752205	0.422680412	99	0.117564881	0.149532612	1	-9.226913838
M9426	4A	1736032	0.072794974	0.340206186	99	0.117564881	0.149522888	1	11.77527571
M777	1B	0	0.072800868	0.340206186	99	0.117564881	0.149521549	1	21.07256977
M3566	2B	0	0.073000568	0.494845361	99	0.117564881	0.149476233	1	-10.41848566
M9849	5A	27470847	0.073017111	0.350515464	99	0.117564881	0.149472485	1	30.58309756
M2779	2A	458670664	0.073121359	0.18556701	99	0.117564881	0.149448888	1	-18.29528259
M11240	5B	528687594	0.073242614	0.432989691	99	0.117564881	0.149421488	1	9.598669967
M13382	6B	449771887	0.073263243	0.24742268	99	0.117564881	0.149416832	1	10.62074977
M4813	2B	602108234	0.073269742	0.484536082	99	0.117564881	0.149415365	1	-13.58564718
M8750	4A	571212163	0.073280066	0.24742268	99	0.117564881	0.149413035	1	-10.88416016
M10140	5A	482358282	0.07340301	0.319587629	99	0.117564881	0.14938532	1	-9.815917658
M4144	2B	380453000	0.073473969	0.072164948	99	0.117564881	0.149369346	1	-18.47345646
M2875	2A	505417306	0.073524782	0.474226804	99	0.117564881	0.149357918	1	13.21511011
M10666	5B	50528841	0.073591816	0.329896907	99	0.117564881	0.149342855	1	-11.59642678
M5644	2D	587305772	0.073598383	0.237113402	99	0.117564881	0.14934138	1	11.4969045
M13600	6B	675620421	0.073624571	0.134020619	99	0.117564881	0.1493355	1	-12.85913034
M1014	1B	4821459	0.073641954	0.051546392	99	0.117564881	0.149331599	1	20.52421497
M15544	7B	92684193	0.073675328	0.474226804	99	0.117564881	0.14932411	1	-10.92438335
M3923	2B	147618275	0.073728105	0.463917526	99	0.117564881	0.149312276	1	12.40093146
M1554	1B	47996789	0.073777823	0.12371134	99	0.117564881	0.149301136	1	16.3259852
M8388	3D	184366461	0.073805369	0.226804124	99	0.117564881	0.149294968	1	-13.4762451
M8236	3B	187625882	0.073832977	0.298969072	99	0.117564881	0.149288788	1	-12.68205704
M6687	3A	420562185	0.073912842	0.381443299	99	0.117564881	0.149270925	1	13.52893987
M5085	2B	757936127	0.073913814	0.432989691	99	0.117564881	0.149270708	1	11.49854246
M14727	7A	495536855	0.074028549	0.216494845	99	0.117564881	0.149245083	1	-13.47710796
M7662	3B	62539498	0.074057862	0.350515464	99	0.117564881	0.149238543	1	11.48461018
M2641	2A	132163747	0.074444685	0.195876289	99	0.117564881	0.149152506	1	-13.17853571
M708	1B	7160758	0.074452104	0.474226804	99	0.117564881	0.149150861	1	12.65468199
M9235	4A	716789227	0.074463179	0.402061856	99	0.117564881	0.149148405	1	12.03955751
M8214	3B	823913888	0.074673146	0.092783505	99	0.117564881	0.149101921	1	16.45733512
M14601	7A	102061623	0.074682382	0.350515464	99	0.117564881	0.149099879	1	17.69433731
M11442	5B	546780922	0.074695389	0.381443299	99	0.117564881	0.149097005	1	10.39434981
M6848	3A	738194828	0.074915864	0.103092784	99	0.117564881	0.149048364	1	16.65014137
M4007	2B	184494452	0.074993143	0.381443299	99	0.117564881	0.149031351	1	-23.3267781
M409	1A	501031648	0.075061668	0.494845361	99	0.117564881	0.149016282	1	-13.388981
M14566	7A	83158962	0.075114027	0.360824742	99	0.117564881	0.149004778	1	12.96956928
M15508	7B	603658181	0.075129712	0.175257732	99	0.117564881	0.149001334	1	12.96734793
M3584	2B	40945523	0.075170684	0.360824742	99	0.117564881	0.14899234	1	12.89832056
M11381	5B	537784811	0.075330947	0.278350515	99	0.117564881	0.148957211	1	12.88049589
M8270	3D	0	0.075417407	0.474226804	99	0.117564881	0.148938293	1	-16.51892414
M2605	2A	77942011	0.075507354	0.360824742	99	0.117564881	0.148918638	1	-14.86747062
M12009	5D	553479783	0.075540734	0.268041237	99	0.117564881	0.14891135	1	16.06326235
M10543	5B	1261539	0.075551214	0.257731959	99	0.117564881	0.148909063	1	-10.59135564
M11099	5B	549422619	0.075710849	0.06185567	99	0.117564881	0.148874264	1	19.50402026
M6276	3A	42066915	0.07571196	0.381443299	99	0.117564881	0.148874022	1	20.09567959
M10549	5B	17888082	0.075733509	0.278350515	99	0.117564881	0.148869331	1	-11.69085806
M5640	2D	593898542	0.075813786	0.381443299	99	0.117564881	0.148851867	1	10.28730587
M4742	2B	730086784	0.075980608	0.195876289	99	0.117564881	0.148815641	1	-11.07706331
M5703	2D	591603469	0.075982616	0.175257732	99	0.117564881	0.148815205	1	-15.74141925
M9779	4D	455472305	0.076110476	0.412371134	99	0.117564881	0.148787499	1	-11.12204333
M11941	5D	490937616	0.076290537	0.484536082	99	0.117564881	0.148748568	1	12.46895736
M5843	2D	571082311	0.076374532	0.154639175	99	0.117564881	0.148730442	1	14.34247604
M13297	6B	0	0.076378956	0.443298969	99	0.117564881	0.148729488	1	16.44518395
M7526	3B	536049099	0.076464058	0.103092784	99	0.117564881	0.148711146	1	-14.39509657
M7665	3B	618741721	0.076500627	0.12371134	99	0.117564881	0.148703272	1	16.01127705
M7311	3B	0	0.076647858	0.412371134	99	0.117564881	0.148671609	1	-16.62723164
M2440	2A	21812330	0.076684785	0.164948454	99	0.117564881	0.148663677	1	23.68097857
M3380	2A	612169049	0.076877527	0.350515464	99	0.117564881	0.148622349	1	-10.26281311
M10952	5B	540057591	0.077014467	0.206185567	99	0.117564881	0.148593055	1	12.28250549
M5905	2D	755037267	0.077049254	0.340206186	99	0.117564881	0.148585622	1	10.57046268
M2043	1D	33589188	0.077114301	0.319587629	99	0.117564881	0.148571734	1	-20.64776761
M7153	3B	24262407	0.077153062	0.206185567	99	0.117564881	0.148563464	1	-10.63689267
M2186	1D	423927982	0.077169582	0.309278351	99	0.117564881	0.148559941	1	-9.172786225
M7551	3B	473710563	0.077194786	0.113402062	99	0.117564881	0.148554568	1	14.25850091
M904	1B	5549025	0.077303237	0.443298969	99	0.117564881	0.148531467	1	-10.59110471
M878	1B	22152407	0.077455444	0.329896907	99	0.117564881	0.148499107	1	-12.59878232
M11318	5B	373116658	0.077579929	0.360824742	99	0.117564881	0.148472692	1	13.09701097
M13483	6B	631806635	0.077717839	0.134020619	99	0.117564881	0.148443482	1	14.14919967
M78	1A	14189304	0.077742103	0.175257732	99	0.117564881	0.148438348	1	-12.22706522
M14837	7A	96059619	0.077806837	0.350515464	99	0.117564881	0.148424662	1	-30.70622128
M14841	7A	671752070	0.077806837	0.350515464	99	0.117564881	0.148424662	1	-30.70622128
M14861	7A	679816918	0.077806837	0.350515464	99	0.117564881	0.148424662	1	30.70622128
M7348	3B	444842198	0.077806837	0.350515464	99	0.117564881	0.148424662	1	30.70622128
M7721	3B	675281060	0.077907791	0.319587629	99	0.117564881	0.148403342	1	-17.80376941
M3793	2B	96381383	0.077923199	0.164948454	99	0.117564881	0.148400091	1	-14.38638542
M4741	2B	730086784	0.077997675	0.474226804	99	0.117564881	0.148384385	1	-13.88438289
M14492	7A	52413793	0.078139121	0.412371134	99	0.117564881	0.148354603	1	-21.434202
M14599	7A	108215582	0.078278452	0.391752577	99	0.117564881	0.148325323	1	-13.28588718
M6282	3A	29861477	0.078421635	0.453608247	99	0.117564881	0.148295294	1	-18.70938386
M15076	7A	717597472	0.078424897	0.298969072	99	0.117564881	0.14829461	1	12.40721004
M3136	2A	756929010	0.078477364	0.195876289	99	0.117564881	0.148283622	1	-11.25471893
M3427	2B	227590363	0.078571418	0.288659794	99	0.117564881	0.148263944	1	10.99835839
M14217	7A	0	0.078585129	0.463917526	99	0.117564881	0.148261078	1	9.741659989
M15103	7A	731424299	0.078708887	0.443298969	99	0.117564881	0.148235229	1	18.30434289
M572	1A	559780847	0.078761644	0.24742268	99	0.117564881	0.148224224	1	12.42669912
M10880	5B	0	0.078932812	0.391752577	99	0.117564881	0.148188573	1	-10.62841528
M4882	2B	751248841	0.078939424	0.350515464	99	0.117564881	0.148187197	1	-14.78762654
M8855	4A	483683726	0.079021336	0.329896907	99	0.117564881	0.148170168	1	-10.08880313
M8273	3D	0	0.079112346	0.24742268	99	0.117564881	0.14815127	1	12.95135811
M4531	2B	673234348	0.07925016	0.216494845	99	0.117564881	0.148122698	1	11.87100179
M14265	7A	11415890	0.0792778	0.113402062	99	0.117564881	0.148116975	1	14.52872656
M15490	7B	600657278	0.079297117	0.092783505	99	0.117564881	0.148112976	1	-16.97734163
M31	1A	7078505	0.079402663	0.092783505	99	0.117564881	0.148091145	1	-16.45585376
M15137	7A	736378833	0.079431452	0.041237113	99	0.117564881	0.148085196	1	-18.58464523
M1536	1B	572148431	0.079434453	0.474226804	99	0.117564881	0.148084576	1	13.77817095
M3035	2A	644635668	0.079487587	0.319587629	99	0.117564881	0.148073602	1	-13.3296503
M3674	2B	66667038	0.07954776	0.381443299	99	0.117564881	0.148061185	1	-10.09489558
M467	1A	422061458	0.079585676	0.443298969	99	0.117564881	0.148053366	1	-12.7208732
M6037	3A	488385956	0.079629922	0.443298969	99	0.117564881	0.148044247	1	-14.9467615
M1644	1B	601377907	0.079636216	0.072164948	99	0.117564881	0.14804295	1	17.53499893
M5099	2B	773465887	0.079709204	0.360824742	99	0.117564881	0.148027921	1	11.84287479
M8615	4A	125790560	0.079775768	0.432989691	99	0.117564881	0.148014227	1	-9.291489591
M4049	2B	574509277	0.079812696	0.412371134	99	0.117564881	0.148006636	1	-9.870697737
M1297	1B	65947056	0.079839404	0.432989691	99	0.117564881	0.148001147	1	13.69898358
M11178	5B	0	0.079877137	0.113402062	99	0.117564881	0.147993397	1	-14.9345751
M7143	3B	640905058	0.079925109	0.18556701	99	0.117564881	0.14798355	1	13.95177867
M14862	7A	679816918	0.080010341	0.134020619	99	0.117564881	0.14796607	1	14.55454794
M13900	6D	16512596	0.080202552	0.350515464	99	0.117564881	0.147926725	1	14.08054896
M13678	6B	705232815	0.080237087	0.432989691	99	0.117564881	0.147919667	1	15.26635073
M2031	1D	20698660	0.080374961	0.329896907	99	0.117564881	0.147891521	1	-13.71415149
M412	1A	509033606	0.080470915	0.072164948	99	0.117564881	0.147871964	1	-16.35560455
M8159	3B	76729619	0.080481709	0.298969072	99	0.117564881	0.147869766	1	20.98949352
M2286	1D	0	0.080537693	0.474226804	99	0.117564881	0.147858369	1	12.84789799
M4705	2B	711319990	0.080618618	0.226804124	99	0.117564881	0.14784191	1	-11.66222295
M1502	1B	558913560	0.080673969	0.402061856	99	0.117564881	0.147830663	1	-11.96009105
M1000	1B	58020079	0.080749006	0.350515464	99	0.117564881	0.147815429	1	13.43083447
M3732	2B	732708108	0.080752116	0.257731959	99	0.117564881	0.147814798	1	-11.09243264
M6448	3A	523316233	0.080789484	0.24742268	99	0.117564881	0.147807218	1	10.8664973
M14200	7A	8334483	0.080935935	0.391752577	99	0.117564881	0.147777547	1	-13.87882473
M257	1A	386477411	0.08095635	0.350515464	99	0.117564881	0.147773416	1	-29.95470793
M11715	5B	658542155	0.08095635	0.350515464	99	0.117564881	0.147773416	1	29.95470793
M12797	6A	599245307	0.080992842	0.340206186	99	0.117564881	0.147766034	1	11.50278852
M4926	2B	370533021	0.081013228	0.103092784	99	0.117564881	0.147761911	1	-16.64388507
M3825	2B	587422326	0.08116262	0.237113402	99	0.117564881	0.147731737	1	-11.3225464
M6995	3B	0	0.081186392	0.391752577	99	0.117564881	0.147726941	1	-11.65274301
M14286	7A	0	0.081186811	0.422680412	99	0.117564881	0.147726856	1	-15.98956893
M6903	3B	2102404	0.081334382	0.226804124	99	0.117564881	0.147697119	1	-11.4863429
M471	1A	520328681	0.081389857	0.206185567	99	0.117564881	0.147685955	1	12.99401301
M4	1A	6341226	0.081415084	0.216494845	99	0.117564881	0.147680881	1	-12.46087688
M2154	1D	418529908	0.081454462	0.432989691	99	0.117564881	0.147672965	1	15.13379926
M13910	6D	10760221	0.08148591	0.350515464	99	0.117564881	0.147666646	1	12.03504159
M1338	1B	380472532	0.081556161	0.402061856	99	0.117564881	0.147652539	1	11.7995381
M3881	2B	151895513	0.081720152	0.381443299	99	0.117564881	0.14761966	1	-21.33355976
M5455	2D	58726921	0.081740516	0.329896907	99	0.117564881	0.147615583	1	27.1668155
M5865	2D	601604653	0.081741817	0.360824742	99	0.117564881	0.147615322	1	12.68567862
M2345	2A	15529824	0.081927262	0.18556701	99	0.117564881	0.14757824	1	20.49591791
M10601	5B	28880693	0.081952827	0.268041237	99	0.117564881	0.147573135	1	9.925574088
M14483	7A	49927360	0.081974382	0.432989691	99	0.117564881	0.147568833	1	-14.44196152
M15217	7B	0	0.082051594	0.463917526	99	0.117564881	0.14755343	1	11.95008411
M12890	6A	467313559	0.082074446	0.298969072	99	0.117564881	0.147548874	1	-12.64049541
M14721	7A	448594215	0.082092983	0.216494845	99	0.117564881	0.14754518	1	-13.20587319
M7625	3B	602233891	0.082097434	0.154639175	99	0.117564881	0.147544293	1	-14.99777772
M14422	7A	35630453	0.0821263	0.474226804	99	0.117564881	0.147538542	1	-17.78708546
M9211	4A	9824444	0.082144089	0.381443299	99	0.117564881	0.147534999	1	-17.98769973
M10122	5A	476833242	0.082253939	0.144329897	99	0.117564881	0.147513141	1	-11.97831675
M3776	2B	0	0.082346697	0.257731959	99	0.117564881	0.147494708	1	-18.83875381
M1454	1B	99914122	0.082382797	0.154639175	99	0.117564881	0.14748754	1	-19.09238549
M5094	2B	774088019	0.082410681	0.329896907	99	0.117564881	0.147482006	1	12.92133415
M10750	5B	400097283	0.082432913	0.103092784	99	0.117564881	0.147477595	1	16.50844433
M5774	2D	0	0.08244968	0.494845361	99	0.117564881	0.147474269	1	-13.91092613
M9390	4A	732814470	0.08251932	0.103092784	99	0.117564881	0.147460464	1	-15.75778948
M13050	6B	318621390	0.082632613	0.24742268	99	0.117564881	0.147438033	1	11.84131789
M12223	6A	14940663	0.082656641	0.226804124	99	0.117564881	0.14743328	1	-11.61045414
M7617	3B	577639598	0.082768038	0.391752577	99	0.117564881	0.147411264	1	26.25964745
M15373	7B	475656023	0.082803451	0.432989691	99	0.117564881	0.147404272	1	-13.91515774
M9105	4A	694752853	0.082838087	0.319587629	99	0.117564881	0.147397437	1	19.66104403
M5768	2D	26003239	0.082866633	0.484536082	99	0.117564881	0.147391806	1	-13.82336254
M11494	5B	481184562	0.082888042	0.329896907	99	0.117564881	0.147387584	1	12.52145112
M13026	6B	19336874	0.082894311	0.113402062	99	0.117564881	0.147386348	1	14.12860022
M2743	2A	188730587	0.082911854	0.463917526	99	0.117564881	0.147382889	1	-14.43860472
M15599	7B	0	0.082924472	0.474226804	99	0.117564881	0.147380402	1	-14.19676914
M13767	6B	471249115	0.083114451	0.484536082	99	0.117564881	0.147343008	1	11.33718485
M2396	2A	24002743	0.083208146	0.175257732	99	0.117564881	0.147324601	1	-18.05497578
M2559	2A	95059749	0.083254547	0.278350515	99	0.117564881	0.147315493	1	-15.21913722
M11867	5B	552916735	0.083324022	0.092783505	99	0.117564881	0.147301867	1	14.66981455
M1883	1B	480971976	0.083389137	0.443298969	99	0.117564881	0.147289107	1	-16.30415425
M12069	6A	1062349	0.083393712	0.350515464	99	0.117564881	0.147288211	1	12.88921489
M345	1A	486815863	0.083422961	0.278350515	99	0.117564881	0.147282483	1	-24.16858074
M9214	4A	14301407	0.083458478	0.391752577	99	0.117564881	0.147275531	1	13.58751041
M4496	2B	555576973	0.083499448	0.195876289	99	0.117564881	0.147267516	1	-11.40659943
M1333	1B	470907649	0.08353006	0.360824742	99	0.117564881	0.147261529	1	-16.14094202
M5626	2D	568465158	0.083554009	0.422680412	99	0.117564881	0.147256848	1	15.68951245
M10818	5B	43437349	0.083578071	0.164948454	99	0.117564881	0.147252146	1	-12.77021655
M15367	7B	158543054	0.083690935	0.154639175	99	0.117564881	0.14723011	1	-14.36530223
M3788	2B	0	0.08372127	0.24742268	99	0.117564881	0.147224193	1	-13.65264921
M11006	5B	481080959	0.083737029	0.319587629	99	0.117564881	0.14722112	1	-10.6823263
M13829	6B	470111441	0.083910273	0.226804124	99	0.117564881	0.147187379	1	12.40851405
M10546	5B	2582396	0.083929297	0.144329897	99	0.117564881	0.147183679	1	15.49900848
M686	1A	370054619	0.083931281	0.082474227	99	0.117564881	0.147183293	1	17.49135276
M15458	7B	0	0.083937139	0.268041237	99	0.117564881	0.147182153	1	-11.02569225
M5240	2B	31519188	0.083947947	0.371134021	99	0.117564881	0.147180052	1	18.28948814
M15475	7B	594218929	0.083964425	0.453608247	99	0.117564881	0.147176848	1	13.27465555
M3583	2B	40945523	0.083974669	0.298969072	99	0.117564881	0.147174857	1	11.22269479
M7751	3B	72949372	0.084080749	0.443298969	99	0.117564881	0.147154252	1	9.331254461
M10916	5B	452129331	0.084107971	0.164948454	99	0.117564881	0.147148969	1	-12.05673565
M13572	6B	561062316	0.084174747	0.216494845	99	0.117564881	0.147136018	1	-11.02186222
M4770	2B	733890211	0.084331802	0.134020619	99	0.117564881	0.147105601	1	14.02300129
M3697	2B	68756048	0.084363168	0.103092784	99	0.117564881	0.147099534	1	13.87300447
M7425	3B	237976322	0.084415266	0.082474227	99	0.117564881	0.147089462	1	-14.89770678
M15487	7B	600720209	0.084465461	0.350515464	99	0.117564881	0.147079765	1	11.91690325
M152	1A	31918043	0.084510058	0.319587629	99	0.117564881	0.147071154	1	-10.81499104
M128	1A	16933203	0.084537373	0.226804124	99	0.117564881	0.147065882	1	11.36695104
M2238	1D	638502351	0.08454174	0.072164948	99	0.117564881	0.14706504	1	-16.07478243
M8679	4A	157557592	0.084741966	0.092783505	99	0.117564881	0.147026458	1	-16.2224272
M11914	5D	341609030	0.084751674	0.391752577	99	0.117564881	0.14702459	1	17.56668677
M10217	5A	604291672	0.084811982	0.402061856	99	0.117564881	0.14701299	1	19.9099154
M15079	7A	712669386	0.084811982	0.402061856	99	0.117564881	0.14701299	1	19.9099154
M5280	2B	549670301	0.084844957	0.164948454	99	0.117564881	0.147006652	1	-13.9687973
M14642	7A	130079234	0.084859072	0.474226804	99	0.117564881	0.147003939	1	-14.84979011
M12548	6A	517418179	0.084998211	0.463917526	99	0.117564881	0.146977228	1	-15.33761488
M4146	2B	184403011	0.085045785	0.164948454	99	0.117564881	0.146968106	1	16.34667103
M14582	7A	82636454	0.0850937	0.319587629	99	0.117564881	0.146958924	1	12.00212087
M9905	5A	34323774	0.085102015	0.288659794	99	0.117564881	0.146957331	1	-12.5730392
M3432	2B	172205833	0.085133658	0.072164948	99	0.117564881	0.146951271	1	-15.73517262
M129	1A	0	0.085164497	0.453608247	99	0.117564881	0.146945368	1	-12.34029984
M12515	6A	143013871	0.085180684	0.381443299	99	0.117564881	0.14694227	1	19.73598688
M13936	6D	14987960	0.085348332	0.422680412	99	0.117564881	0.146910225	1	-16.20828484
M8008	3B	493706157	0.085384141	0.072164948	99	0.117564881	0.146903389	1	-16.46853257
M9851	5A	9210215	0.085628253	0.278350515	99	0.117564881	0.146856874	1	-11.940414
M3572	2B	695616717	0.085792885	0.474226804	99	0.117564881	0.146825585	1	-10.16839022
M14269	7A	9517687	0.085806273	0.453608247	99	0.117564881	0.146823044	1	12.65861571
M3193	2A	66819913	0.085879504	0.371134021	99	0.117564881	0.14680915	1	11.57465283
M3518	2B	16830467	0.08588969	0.484536082	99	0.117564881	0.146807218	1	-9.178657123
M7909	3B	159834993	0.085964524	0.288659794	99	0.117564881	0.146793035	1	-11.76533495
M7971	3B	146553872	0.086031634	0.206185567	99	0.117564881	0.146780328	1	10.47004452
M8656	4A	330085918	0.086077101	0.463917526	99	0.117564881	0.146771725	1	-15.64452492
M11768	5B	683514701	0.086080181	0.309278351	99	0.117564881	0.146771142	1	11.74512533
M4791	2B	724734789	0.086094873	0.092783505	99	0.117564881	0.146768363	1	-16.35394393
M269	1A	479742741	0.086150408	0.226804124	99	0.117564881	0.146757865	1	12.56364936
M6348	3A	478681812	0.086307753	0.381443299	99	0.117564881	0.146728159	1	-10.44243573
M1815	1B	656423079	0.086328045	0.412371134	99	0.117564881	0.146724332	1	-15.2643058
M8852	4A	111059555	0.086541901	0.278350515	99	0.117564881	0.146684063	1	10.24686786
M9025	4A	685816847	0.086697338	0.257731959	99	0.117564881	0.146654863	1	11.98745686
M14834	7A	663768828	0.086954794	0.329896907	99	0.117564881	0.146606624	1	19.59396253
M11031	5B	487460716	0.086998098	0.453608247	99	0.117564881	0.146598526	1	14.85885222
M1409	1B	512275631	0.087006226	0.360824742	99	0.117564881	0.146597007	1	-10.21681139
M1419	1B	221737181	0.087080001	0.010309278	99	0.117564881	0.146583221	1	36.55510086
M12311	6A	23587868	0.087167989	0.443298969	99	0.117564881	0.146566798	1	11.71004129
M15366	7B	458316341	0.087248544	0.432989691	99	0.117564881	0.146551777	1	-15.8796603
M10997	5B	438110208	0.087649828	0.463917526	99	0.117564881	0.14647718	1	-16.58221151
M3596	2B	506395762	0.087835278	0.092783505	99	0.117564881	0.146442832	1	12.90471055
M10058	5A	469516830	0.087927247	0.371134021	99	0.117564881	0.146425828	1	10.72753032
M10402	5A	582094327	0.087931538	0.340206186	99	0.117564881	0.146425035	1	9.541198626
M15112	7A	718204695	0.087944952	0.134020619	99	0.117564881	0.146422556	1	17.85451341
M8314	3D	376879674	0.087965164	0.298969072	99	0.117564881	0.146418823	1	-11.14422956
M14446	7A	37283874	0.087975781	0.154639175	99	0.117564881	0.146416862	1	19.75964258
M14459	7A	46522324	0.087975781	0.154639175	99	0.117564881	0.146416862	1	19.75964258
M5519	2D	74929509	0.088131031	0.402061856	99	0.117564881	0.146388219	1	-10.9108313
M9054	4A	660462703	0.088182967	0.103092784	99	0.117564881	0.14637865	1	-15.17293252
M5566	2D	375935762	0.088221417	0.484536082	99	0.117564881	0.146371569	1	10.36179025
M4901	2B	751843230	0.088297748	0.350515464	99	0.117564881	0.146357523	1	31.20819097
M4701	2B	425264799	0.088501874	0.391752577	99	0.117564881	0.146320026	1	14.54201024
M7696	3B	669426645	0.088509896	0.422680412	99	0.117564881	0.146318554	1	12.0948331
M15481	7B	0	0.088751928	0.175257732	99	0.117564881	0.146274222	1	10.88064638
M5983	2D	646478908	0.088803262	0.154639175	99	0.117564881	0.146264836	1	14.37932946
M5219	2B	0	0.088810782	0.381443299	99	0.117564881	0.146263461	1	10.45052745
M12231	6A	13276649	0.088924459	0.18556701	99	0.117564881	0.1462427	1	17.63656728
M1218	1B	2308496	0.088940415	0.092783505	99	0.117564881	0.146239789	1	21.15053184
M14749	7A	626447683	0.088993788	0.443298969	99	0.117564881	0.146230053	1	-12.41003189
M120	1A	21638580	0.08900933	0.278350515	99	0.117564881	0.146227219	1	-10.30507448
M9001	4A	702393879	0.089073233	0.257731959	99	0.117564881	0.146215574	1	-11.26609545
M4913	2B	759189621	0.089674251	0.360824742	99	0.117564881	0.146106494	1	12.82702255
M2256	1D	470523363	0.089730999	0.453608247	99	0.117564881	0.146096236	1	-18.59466046
M2180	1D	416755450	0.089901745	0.463917526	99	0.117564881	0.146065416	1	14.99149611
M5130	2B	221893152	0.090022638	0.298969072	99	0.117564881	0.146043633	1	10.31958203
M4943	2B	751539866	0.090027234	0.381443299	99	0.117564881	0.146042805	1	-10.68509216
M9185	4A	712151623	0.090163501	0.371134021	99	0.117564881	0.146018292	1	-10.92572977
M12334	6A	473514978	0.090178752	0.082474227	99	0.117564881	0.146015551	1	15.82508697
M1559	1B	685243263	0.090211042	0.371134021	99	0.117564881	0.14600975	1	-15.07782443
M4821	2B	730646221	0.090483522	0.453608247	99	0.117564881	0.145960884	1	-14.74673608
M5174	2B	0	0.09050047	0.288659794	99	0.117564881	0.14595785	1	-10.00480158
M11512	5B	0	0.090558149	0.06185567	99	0.117564881	0.145947529	1	17.74296801
M6142	3A	538313651	0.090583896	0.494845361	99	0.117564881	0.145942925	1	-11.89634847
M5481	2D	68916330	0.090656726	0.041237113	99	0.117564881	0.145929907	1	-20.93643372
M9902	5A	104616943	0.090790794	0.484536082	99	0.117564881	0.145905974	1	10.72388041
M9947	5A	46628073	0.090812572	0.206185567	99	0.117564881	0.14590209	1	13.04329434
M858	1B	36034202	0.090853175	0.288659794	99	0.117564881	0.145894851	1	-12.60466643
M9922	5A	39746104	0.090859698	0.474226804	99	0.117564881	0.145893688	1	-12.11602229
M2209	1D	475877262	0.090883245	0.484536082	99	0.117564881	0.145889493	1	14.13815429
M517	1A	549589444	0.090984382	0.484536082	99	0.117564881	0.145871484	1	-12.33877865
M130	1A	0	0.091009235	0.134020619	99	0.117564881	0.145867062	1	12.97137162
M4154	2B	183207936	0.091077202	0.216494845	99	0.117564881	0.145854976	1	-11.38265924
M15501	7B	0	0.091160068	0.443298969	99	0.117564881	0.145840254	1	-9.50186837
M14793	7A	627011118	0.091160666	0.329896907	99	0.117564881	0.145840148	1	-11.71287247
M13545	6B	479212545	0.091181807	0.082474227	99	0.117564881	0.145836394	1	15.11573021
M4675	2B	595508003	0.091252672	0.371134021	99	0.117564881	0.145823819	1	10.48975117
M6964	3B	34165434	0.091319223	0.103092784	99	0.117564881	0.14581202	1	14.06050799
M15042	7A	720347008	0.091351598	0.020618557	99	0.117564881	0.145806283	1	28.18067846
M8412	3D	380816249	0.091369574	0.216494845	99	0.117564881	0.145803098	1	-10.32476942
M11745	5B	67371328	0.091397547	0.175257732	99	0.117564881	0.145798145	1	-11.29602914
M9954	5A	78242526	0.091421533	0.226804124	99	0.117564881	0.145793898	1	11.45380132
M14597	7A	94404127	0.091487205	0.113402062	99	0.117564881	0.145782278	1	13.8768447
M2793	2A	497439858	0.091630987	0.371134021	99	0.117564881	0.145756869	1	-20.95030621
M2785	2A	566856432	0.091630987	0.371134021	99	0.117564881	0.145756869	1	20.95030621
M15098	7A	720912669	0.091929231	0.164948454	99	0.117564881	0.145704304	1	15.8209775
M5055	2B	0	0.0919491	0.443298969	99	0.117564881	0.145700809	1	9.854928594
M10135	5A	454808351	0.091960845	0.237113402	99	0.117564881	0.145698743	1	-12.56555483
M14842	7A	671752070	0.091973463	0.298969072	99	0.117564881	0.145696524	1	10.29877609
M2052	1D	43145259	0.092002067	0.371134021	99	0.117564881	0.145691495	1	-11.19061039
M6319	3A	434822187	0.09203585	0.216494845	99	0.117564881	0.145685558	1	-12.15603884
M7447	3B	256783523	0.092105621	0.391752577	99	0.117564881	0.145673304	1	11.23605915
M4580	2B	0	0.09229736	0.288659794	99	0.117564881	0.145639681	1	-9.992316627
M3050	2A	498229618	0.092412831	0.360824742	99	0.117564881	0.145619469	1	-25.19905244
M3148	2A	755807963	0.092412831	0.360824742	99	0.117564881	0.145619469	1	25.19905244
M5492	2D	79085779	0.092412831	0.360824742	99	0.117564881	0.145619469	1	25.19905244
M8219	3B	825858484	0.092493267	0.381443299	99	0.117564881	0.145605406	1	11.85226913
M15511	7B	597080664	0.092566947	0.443298969	99	0.117564881	0.145592536	1	-13.27508871
M2281	1D	494063368	0.092682011	0.360824742	99	0.117564881	0.145572461	1	-23.02706946
M2289	1D	589475153	0.092682011	0.360824742	99	0.117564881	0.145572461	1	-23.02706946
M342	1A	0	0.092726263	0.030927835	99	0.117564881	0.145564747	1	-23.63573518
M15192	7B	89311430	0.093013053	0.103092784	99	0.117564881	0.145514855	1	-13.98830997
M9555	4B	0	0.093064796	0.494845361	99	0.117564881	0.145505872	1	-16.90405891
M4665	2B	577077173	0.093066878	0.494845361	99	0.117564881	0.145505511	1	-15.8918075
M9192	4A	705378018	0.093083625	0.463917526	99	0.117564881	0.145502604	1	14.30074539
M13024	6B	18011646	0.093095801	0.237113402	99	0.117564881	0.145500492	1	-11.18006399
M7681	3B	490515716	0.093250489	0.381443299	99	0.117564881	0.145473678	1	-10.6240722
M8220	3B	825858484	0.093513856	0.103092784	99	0.117564881	0.145428139	1	-14.89271904
M7175	3B	28804833	0.093518598	0.412371134	99	0.117564881	0.14542732	1	-8.602751371
M7479	3B	375425307	0.093534886	0.391752577	99	0.117564881	0.145424509	1	13.21094609
M13377	6B	359069615	0.093559339	0.381443299	99	0.117564881	0.145420289	1	-12.2878746
M4962	2B	753749466	0.093697198	0.164948454	99	0.117564881	0.14539652	1	-12.98713342
M5453	2D	58726921	0.093750902	0.12371134	99	0.117564881	0.145387272	1	12.16956283
M7989	3B	572633902	0.093763735	0.443298969	99	0.117564881	0.145385063	1	-8.66953111
M6784	3A	726107371	0.093769688	0.340206186	99	0.117564881	0.145384038	1	-21.8408622
M626	1A	481551847	0.093810744	0.288659794	99	0.117564881	0.145376973	1	10.55331456
M2276	1D	676009151	0.093885601	0.278350515	99	0.117564881	0.1453641	1	12.26541102
M15574	7B	0	0.094062677	0.216494845	99	0.117564881	0.145333695	1	13.40899693
M2960	2A	692939894	0.094179463	0.268041237	99	0.117564881	0.145313677	1	10.91303163
M11204	5B	48040535	0.094330773	0.402061856	99	0.117564881	0.145287781	1	-14.15472017
M10811	5B	355043560	0.094382598	0.402061856	99	0.117564881	0.145278922	1	-15.08268253
M5378	2D	13833777	0.094409108	0.206185567	99	0.117564881	0.145274393	1	-11.25112453
M15262	7B	71271240	0.094482839	0.443298969	99	0.117564881	0.145261803	1	13.74251137
M1028	1B	206100463	0.094489037	0.103092784	99	0.117564881	0.145260745	1	13.46236052
M5435	2D	33564182	0.094604876	0.113402062	99	0.117564881	0.145240987	1	12.59025576
M1060	1B	35143791	0.094613673	0.309278351	99	0.117564881	0.145239488	1	11.64494467
M4937	2B	618875828	0.094678178	0.350515464	99	0.117564881	0.145228499	1	13.73683085
M10883	5B	520209151	0.094950088	0.340206186	99	0.117564881	0.145182267	1	9.598834114
M3783	2B	91146822	0.095035019	0.257731959	99	0.117564881	0.145167857	1	10.91712599
M4306	2B	648274808	0.095053594	0.237113402	99	0.117564881	0.145164707	1	-11.88152126
M12759	6A	595918169	0.095072025	0.340206186	99	0.117564881	0.145161582	1	-11.84867261
M1784	1B	557155175	0.095175592	0.268041237	99	0.117564881	0.145144037	1	9.158859255
M4879	2B	751248841	0.095187472	0.329896907	99	0.117564881	0.145142025	1	15.07516698
M4891	2B	538864557	0.095187472	0.329896907	99	0.117564881	0.145142025	1	15.07516698
M9630	4B	653614624	0.09532483	0.268041237	99	0.117564881	0.145118791	1	-13.49482025
M11704	5B	644347628	0.095410921	0.443298969	99	0.117564881	0.145104247	1	-14.43273826
M5602	2D	665523602	0.095430324	0.422680412	99	0.117564881	0.145100971	1	-10.81982783
M10489	5A	609478694	0.095623954	0.443298969	99	0.117564881	0.145068321	1	-12.13971939
M2513	2A	32886859	0.095673095	0.422680412	99	0.117564881	0.145060046	1	9.759609556
M13956	6D	97102783	0.095691411	0.371134021	99	0.117564881	0.145056963	1	-13.29052902
M10033	5A	441486802	0.095701868	0.24742268	99	0.117564881	0.145055204	1	-11.61621649
M9976	5A	593667669	0.095709518	0.463917526	99	0.117564881	0.145053916	1	10.36781072
M15097	7A	720912669	0.0958245	0.402061856	99	0.117564881	0.145034581	1	-16.86041451
M341	1A	0	0.095883219	0.340206186	99	0.117564881	0.145024718	1	23.97234448
M14438	7A	37098983	0.095899161	0.144329897	99	0.117564881	0.145022041	1	17.38838234
M4373	2B	446932626	0.095912028	0.340206186	99	0.117564881	0.14501988	1	-10.47006984
M13974	6D	85804139	0.096134648	0.463917526	99	0.117564881	0.144982556	1	-14.03324183
M10734	5B	205114661	0.096184458	0.18556701	99	0.117564881	0.144974219	1	-12.52733605
M4947	2B	760119516	0.096188481	0.391752577	99	0.117564881	0.144973545	1	9.481321074
M11657	5B	336655975	0.096250257	0.309278351	99	0.117564881	0.144963211	1	16.56797723
M8605	4A	67350278	0.096328446	0.443298969	99	0.117564881	0.144950142	1	-9.845404134
M9668	4B	30330500	0.096391624	0.432989691	99	0.117564881	0.144939591	1	11.01274117
M3330	2A	765631505	0.096614673	0.237113402	99	0.117564881	0.144902401	1	10.03776023
M2511	2A	32773682	0.096685525	0.257731959	99	0.117564881	0.144890607	1	15.92651931
M2503	2A	33288813	0.096685525	0.257731959	99	0.117564881	0.144890607	1	-15.92651931
M7491	3B	450294756	0.096732088	0.391752577	99	0.117564881	0.144882862	1	19.14955633
M2869	2A	553276886	0.096798633	0.381443299	99	0.117564881	0.1448718	1	-21.05902988
M9754	4D	80836783	0.096807838	0.402061856	99	0.117564881	0.14487027	1	-23.19945334
M12531	6A	623438271	0.097021149	0.494845361	99	0.117564881	0.144834871	1	8.085323276
M10481	5A	95649798	0.097061018	0.484536082	99	0.117564881	0.144828264	1	-12.45910854
M15204	7B	55840771	0.097104384	0.463917526	99	0.117564881	0.144821081	1	12.69951396
M3861	2B	0	0.097144449	0.422680412	99	0.117564881	0.144814448	1	-15.79553934
M4459	2B	649949245	0.097150131	0.412371134	99	0.117564881	0.144813508	1	-14.5866188
M3590	2B	38132859	0.097194829	0.257731959	99	0.117564881	0.144806112	1	-9.673927386
M11953	5D	543270056	0.09720104	0.350515464	99	0.117564881	0.144805085	1	21.29729907
M4332	2B	410189157	0.097225383	0.371134021	99	0.117564881	0.144801059	1	10.04872582
M14838	7A	96059619	0.097371097	0.020618557	99	0.117564881	0.144776983	1	-28.69363901
M1067	1B	174663837	0.0975999	0.113402062	99	0.117564881	0.144739259	1	-14.33033438
M13789	6B	469537832	0.097897576	0.226804124	99	0.117564881	0.144690326	1	11.8119833
M13587	6B	676372364	0.09798149	0.463917526	99	0.117564881	0.144676562	1	9.608615394
M66	1A	542326485	0.098003309	0.381443299	99	0.117564881	0.144672985	1	-21.43042085
M532	1A	566690179	0.09801508	0.268041237	99	0.117564881	0.144671056	1	-10.10010273
M1342	1B	420692245	0.098078347	0.453608247	99	0.117564881	0.144660691	1	13.26716425
M7211	3B	0	0.098203732	0.371134021	99	0.117564881	0.144640171	1	-24.55961101
M1717	1B	629844981	0.098252884	0.381443299	99	0.117564881	0.144632135	1	-19.01648796
M11580	5B	581759209	0.098386326	0.474226804	99	0.117564881	0.14461034	1	-12.18051442
M9967	5A	283796742	0.098392746	0.288659794	99	0.117564881	0.144609293	1	-9.143407844
M3177	2A	758417987	0.098410926	0.402061856	99	0.117564881	0.144606326	1	11.0372632
M14624	7A	199855285	0.098413702	0.381443299	99	0.117564881	0.144605873	1	-9.549337786
M10307	5A	0	0.098431804	0.154639175	99	0.117564881	0.14460292	1	14.45824738
M8480	3D	577418701	0.09847676	0.494845361	99	0.117564881	0.144595589	1	8.696367568
M11795	5B	625779199	0.09854078	0.051546392	99	0.117564881	0.144585155	1	19.18376909
M7404	3B	561487846	0.098775441	0.371134021	99	0.117564881	0.144546975	1	20.24030238
M3916	2B	65243708	0.098798253	0.030927835	99	0.117564881	0.144543269	1	-22.92619358
M10212	5A	512585815	0.099000368	0.340206186	99	0.117564881	0.144510473	1	-11.67513438
M2617	2A	355706503	0.0990099	0.432989691	99	0.117564881	0.144508928	1	11.66473353
M8395	3D	220863172	0.099021792	0.432989691	99	0.117564881	0.144507001	1	10.19893438
M4877	2B	744905320	0.099054793	0.340206186	99	0.117564881	0.144501654	1	-14.48432135
M14744	7A	577687730	0.099102397	0.195876289	99	0.117564881	0.144493945	1	-13.67728419
M3558	2B	19611130	0.099220545	0.268041237	99	0.117564881	0.14447483	1	12.38370998
M534	1A	454769741	0.099244589	0.257731959	99	0.117564881	0.144470943	1	-11.56837088
M11920	5D	363181276	0.099297589	0.051546392	99	0.117564881	0.144462379	1	17.42780656
M11083	5B	0	0.099372855	0.051546392	99	0.117564881	0.144450225	1	20.24560714
M7096	3B	565309643	0.099403001	0.309278351	99	0.117564881	0.14444536	1	9.446325189
M7429	3B	206292554	0.099410004	0.072164948	99	0.117564881	0.144444231	1	15.2242545
M7500	3B	248342512	0.099447903	0.381443299	99	0.117564881	0.144438117	1	-19.40845738
M6102	3A	18171651	0.099516117	0.24742268	99	0.117564881	0.144427121	1	-10.3745369
M14728	7A	495536855	0.099539297	0.340206186	99	0.117564881	0.144423386	1	-11.49933522
M4716	2B	717090293	0.099682166	0.402061856	99	0.117564881	0.144400387	1	13.20422653
M10158	5A	601178570	0.099707335	0.175257732	99	0.117564881	0.144396339	1	-10.22076919
M15089	7A	83643438	0.099755474	0.350515464	99	0.117564881	0.1443886	1	-10.44623899
M10434	5A	490330792	0.099794175	0.164948454	99	0.117564881	0.144382381	1	-12.89474058
M2500	2A	30335188	0.09980046	0.402061856	99	0.117564881	0.144381372	1	-14.10823261
M13954	6D	95594839	0.099884588	0.381443299	99	0.117564881	0.144367864	1	-12.79689822
M13240	6B	0	0.099884755	0.082474227	99	0.117564881	0.144367837	1	16.91146761
M5561	2D	432854196	0.100030785	0.391752577	99	0.117564881	0.14434442	1	9.380591208
M2576	2A	71172019	0.100128148	0.309278351	99	0.117564881	0.144328828	1	14.18493381
M7969	3B	95564668	0.100183616	0.453608247	99	0.117564881	0.144319953	1	9.687208597
M9577	4B	544593891	0.100192114	0.195876289	99	0.117564881	0.144318593	1	-13.11167487
M13709	6B	599287726	0.100324227	0.474226804	99	0.117564881	0.144297478	1	9.472194325
M12475	6A	113852300	0.100465585	0.154639175	99	0.117564881	0.14427492	1	11.43126125
M9938	5A	79264462	0.100536491	0.453608247	99	0.117564881	0.144263618	1	-14.89602153
M14766	7A	567030452	0.100655522	0.402061856	99	0.117564881	0.144244665	1	-15.93503804
M14720	7A	166513825	0.100717981	0.453608247	99	0.117564881	0.144234729	1	12.93301897
M9950	5A	69140651	0.100766258	0.175257732	99	0.117564881	0.144227054	1	-10.13626319
M4116	2B	416058086	0.10078737	0.154639175	99	0.117564881	0.144223699	1	13.06244608
M6359	3A	480442075	0.100892227	0.12371134	99	0.117564881	0.144207048	1	-17.00779648
M8705	4A	25985745	0.100901616	0.422680412	99	0.117564881	0.144205558	1	12.53604618
M1511	1B	415423029	0.100909832	0.463917526	99	0.117564881	0.144204254	1	9.058036661
M13991	6D	122978486	0.101073118	0.422680412	99	0.117564881	0.144178367	1	-11.16151548
M14501	7A	62750954	0.101095008	0.216494845	99	0.117564881	0.1441749	1	-10.49237352
M12246	6A	17925787	0.101178053	0.24742268	99	0.117564881	0.144161756	1	12.39981816
M3570	2B	31382129	0.101269452	0.24742268	99	0.117564881	0.144147302	1	-11.69851154
M4810	2B	734646054	0.10133705	0.402061856	99	0.117564881	0.144136622	1	10.83896967
M10308	5A	0	0.10136221	0.463917526	99	0.117564881	0.144132649	1	17.03461774
M15107	7A	732392954	0.10136221	0.463917526	99	0.117564881	0.144132649	1	17.03461774
M11549	5B	563543624	0.101372986	0.195876289	99	0.117564881	0.144130948	1	-10.766391
M2531	2A	67087829	0.101410873	0.226804124	99	0.117564881	0.144124968	1	15.66991104
M1742	1B	502110575	0.101497949	0.175257732	99	0.117564881	0.144111233	1	10.18878814
M10550	5B	17888082	0.101499939	0.432989691	99	0.117564881	0.144110919	1	11.24076322
M9169	4A	709851770	0.101509381	0.24742268	99	0.117564881	0.144109431	1	-10.12253501
M7052	3B	447667963	0.101571785	0.06185567	99	0.117564881	0.144099597	1	-19.37157472
M14680	7A	182854304	0.101584301	0.12371134	99	0.117564881	0.144097625	1	-13.16864638
M14203	7A	13966199	0.101667526	0.319587629	99	0.117564881	0.144084522	1	-11.90964522
M5106	2B	772149581	0.101730747	0.144329897	99	0.117564881	0.144074577	1	13.60858461
M225	1A	397437989	0.101740955	0.175257732	99	0.117564881	0.144072972	1	12.68097292
M6002	2D	636354137	0.101798543	0.309278351	99	0.117564881	0.144063919	1	-10.27651303
M15396	7B	536555149	0.101920996	0.164948454	99	0.117564881	0.14404469	1	13.27611893
M4822	2B	730646221	0.102013144	0.257731959	99	0.117564881	0.144030236	1	-15.40429346
M6315	3A	60005414	0.102041951	0.463917526	99	0.117564881	0.144025721	1	-11.31135538
M11226	5B	34050805	0.102069541	0.432989691	99	0.117564881	0.144021397	1	11.01879257
M15330	7B	147686272	0.1022263	0.484536082	99	0.117564881	0.143996857	1	13.77815815
M9515	4B	0	0.10228301	0.072164948	99	0.117564881	0.14398799	1	16.4470898
M11767	5B	683514701	0.10232724	0.350515464	99	0.117564881	0.143981078	1	-10.75477054
M9955	5A	52357838	0.102434577	0.24742268	99	0.117564881	0.143964317	1	-11.52642828
M15285	7B	115401524	0.102440025	0.144329897	99	0.117564881	0.143963467	1	12.3558793
M605	1A	660283082	0.102440791	0.309278351	99	0.117564881	0.143963348	1	-12.83066463
M8411	3D	380816249	0.102522831	0.298969072	99	0.117564881	0.143950551	1	11.12607624
M12734	6A	594854466	0.102596459	0.319587629	99	0.117564881	0.143939077	1	10.70828479
M4740	2B	728198487	0.102666653	0.12371134	99	0.117564881	0.143928146	1	14.73431544
M7805	3B	673217142	0.102736931	0.030927835	99	0.117564881	0.14391721	1	24.04602112
M14356	7A	23895123	0.102782195	0.474226804	99	0.117564881	0.143910171	1	-14.06166965
M1478	1B	546252431	0.102791698	0.371134021	99	0.117564881	0.143908694	1	-9.823007154
M6888	3B	6071524	0.102796684	0.350515464	99	0.117564881	0.143907919	1	-11.73357428
M11971	5D	531606683	0.102822034	0.494845361	99	0.117564881	0.143903979	1	-9.654562133
M8441	3D	524197814	0.102832204	0.432989691	99	0.117564881	0.143902398	1	-9.696836586
M14218	7A	0	0.102854686	0.24742268	99	0.117564881	0.143898905	1	11.61086098
M5716	2D	598851735	0.102981488	0.453608247	99	0.117564881	0.14387922	1	-13.87368396
M6797	3A	729162982	0.103034036	0.082474227	99	0.117564881	0.143871071	1	13.54464337
M14670	7A	148468027	0.103142818	0.463917526	99	0.117564881	0.143854214	1	11.8856402
M3625	2B	24266934	0.103144307	0.340206186	99	0.117564881	0.143853984	1	-9.670038873
M1015	1B	50019841	0.103247015	0.06185567	99	0.117564881	0.143838087	1	18.31806578
M1873	1B	664777238	0.10327409	0.391752577	99	0.117564881	0.143833899	1	11.7950127
M6945	3B	685069835	0.103325569	0.391752577	99	0.117564881	0.14382594	1	-20.04642298
M12765	6A	596176929	0.103335037	0.195876289	99	0.117564881	0.143824477	1	11.83358477
M13747	6B	711703518	0.103487071	0.216494845	99	0.117564881	0.143801	1	11.44915002
M12557	6A	524866973	0.103507524	0.329896907	99	0.117564881	0.143797844	1	11.44643634
M3695	2B	69066012	0.103635797	0.278350515	99	0.117564881	0.143778071	1	-10.71851387
M15194	7B	40276086	0.103753539	0.195876289	99	0.117564881	0.143759944	1	-12.03745216
M12331	6A	0	0.103954461	0.484536082	99	0.117564881	0.143729065	1	11.04371136
M1477	1B	546252431	0.104050185	0.103092784	99	0.117564881	0.143714377	1	14.08503245
M7386	3B	48000913	0.104066756	0.453608247	99	0.117564881	0.143711836	1	13.29700081
M14159	7A	8071270	0.104086577	0.391752577	99	0.117564881	0.143708797	1	21.555489
M10612	5B	316546278	0.104087644	0.474226804	99	0.117564881	0.143708633	1	-14.26655807
M10200	5A	0	0.104099948	0.072164948	99	0.117564881	0.143706747	1	-16.51813163
M9522	4B	521574122	0.104146482	0.226804124	99	0.117564881	0.143699616	1	14.66280819
M5022	2B	593348369	0.104278306	0.309278351	99	0.117564881	0.143679434	1	-13.2375494
M9978	5A	438355093	0.104318248	0.298969072	99	0.117564881	0.143673325	1	-9.528467716
M9850	5A	27470847	0.104467749	0.237113402	99	0.117564881	0.14365048	1	-12.05759829
M5081	2B	767775157	0.104522592	0.422680412	99	0.117564881	0.143642109	1	11.95508416
M8154	3B	485683850	0.104554954	0.051546392	99	0.117564881	0.143637172	1	-19.21743159
M8155	3B	75766790	0.104554954	0.051546392	99	0.117564881	0.143637172	1	-19.21743159
M12086	6A	107264253	0.104575709	0.381443299	99	0.117564881	0.143634006	1	-11.18011947
M14694	7A	255900956	0.104712664	0.474226804	99	0.117564881	0.143613135	1	12.90500579
M6499	3A	533037386	0.10477064	0.484536082	99	0.117564881	0.143604308	1	10.62231933
M11604	5B	686004162	0.104787456	0.175257732	99	0.117564881	0.143601749	1	-12.35135304
M2530	2A	15966155	0.104880452	0.278350515	99	0.117564881	0.143587606	1	12.34282052
M986	1B	60359807	0.104912487	0.319587629	99	0.117564881	0.143582737	1	-10.05174222
M3973	2B	159604259	0.105001876	0.443298969	99	0.117564881	0.14356916	1	-15.15821261
M8138	3B	802901851	0.1050351	0.175257732	99	0.117564881	0.143564116	1	-10.89907921
M2666	2A	120722528	0.105045891	0.154639175	99	0.117564881	0.143562479	1	-11.07768501
M5928	2D	618309251	0.105066603	0.391752577	99	0.117564881	0.143559336	1	-19.06337783
M9055	4A	687327397	0.105199937	0.391752577	99	0.117564881	0.143539122	1	-25.05643915
M10896	5B	540055568	0.105207038	0.309278351	99	0.117564881	0.143538046	1	-9.967440665
M8005	3B	0	0.105256936	0.072164948	99	0.117564881	0.143530489	1	15.60154146
M12236	6A	261310368	0.10529642	0.340206186	99	0.117564881	0.143524512	1	-37.26418821
M12211	6A	14386702	0.10529642	0.340206186	99	0.117564881	0.143524512	1	37.26418821
M12213	6A	13815254	0.10529642	0.340206186	99	0.117564881	0.143524512	1	37.26418821
M12300	6A	23850958	0.10529642	0.340206186	99	0.117564881	0.143524512	1	37.26418821
M12325	6A	0	0.10529642	0.340206186	99	0.117564881	0.143524512	1	37.26418821
M3953	2B	419769571	0.10529642	0.340206186	99	0.117564881	0.143524512	1	37.26418821
M9389	4A	732814470	0.105365688	0.12371134	99	0.117564881	0.143514033	1	14.27779379
M8846	4A	618529609	0.105412649	0.443298969	99	0.117564881	0.143506932	1	-10.52938031
M9304	4A	10150766	0.105422567	0.381443299	99	0.117564881	0.143505433	1	-10.47957399
M4287	2B	159563563	0.105460561	0.463917526	99	0.117564881	0.143499692	1	13.32670818
M5678	2D	547955524	0.105468118	0.134020619	99	0.117564881	0.14349855	1	14.02482086
M6216	3A	170875509	0.105534079	0.24742268	99	0.117564881	0.143488589	1	10.97646553
M4436	2B	620850327	0.105565538	0.463917526	99	0.117564881	0.14348384	1	10.04186552
M14248	7A	0	0.105660424	0.051546392	99	0.117564881	0.143469528	1	25.30821855
M1669	1B	656111729	0.105712794	0.422680412	99	0.117564881	0.143461634	1	-10.02397503
M8621	4A	127984307	0.105745453	0.020618557	99	0.117564881	0.143456714	1	-25.63653182
M8822	4A	132119668	0.105822436	0.206185567	99	0.117564881	0.143445123	1	10.9790906
M3383	2A	585501135	0.105823045	0.350515464	99	0.117564881	0.143445031	1	13.77118314
M13418	6B	574666443	0.105836968	0.257731959	99	0.117564881	0.143442936	1	-11.61467438
M5679	2D	0	0.105847607	0.474226804	99	0.117564881	0.143441335	1	13.74470007
M8327	3D	38148388	0.105853239	0.092783505	99	0.117564881	0.143440488	1	13.80949953
M7178	3B	29498622	0.10595763	0.350515464	99	0.117564881	0.14342479	1	-27.65019836
M13594	6B	673827435	0.10595763	0.350515464	99	0.117564881	0.14342479	1	27.65019836
M10013	5A	329278691	0.106019807	0.432989691	99	0.117564881	0.143415448	1	10.08420579
M8899	4A	668854110	0.106079275	0.237113402	99	0.117564881	0.143406519	1	-9.864310568
M4894	2B	180417768	0.106241969	0.340206186	99	0.117564881	0.143382119	1	-14.56399563
M11911	5D	88471253	0.106254004	0.412371134	99	0.117564881	0.143380316	1	-11.1133603
M13810	6B	715219837	0.106255701	0.175257732	99	0.117564881	0.143380062	1	13.35881051
M9180	4A	709851704	0.106267569	0.474226804	99	0.117564881	0.143378284	1	-15.32385466
M9196	4A	135164375	0.106267569	0.474226804	99	0.117564881	0.143378284	1	-15.32385466
M9524	4B	444886705	0.106296809	0.030927835	99	0.117564881	0.143373904	1	-23.92604923
M3592	2B	33729356	0.106344692	0.298969072	99	0.117564881	0.143366735	1	10.06666291
M14685	7A	128050181	0.106735518	0.494845361	99	0.117564881	0.143308354	1	-11.1661399
M69	1A	10423224	0.10685844	0.360824742	99	0.117564881	0.143290042	1	-14.83888389
M107	1A	9592304	0.106969948	0.463917526	99	0.117564881	0.14327345	1	-12.07098262
M3591	2B	33729356	0.107248534	0.443298969	99	0.117564881	0.143232082	1	15.80369839
M14139	7A	0	0.10731488	0.340206186	99	0.117564881	0.143222248	1	-12.33587183
M11753	5B	678708672	0.107318891	0.371134021	99	0.117564881	0.143221653	1	-21.98525084
M11761	5B	681979338	0.107318891	0.371134021	99	0.117564881	0.143221653	1	21.98525084
M11787	5B	688224445	0.107318891	0.371134021	99	0.117564881	0.143221653	1	21.98525084
M11794	5B	656472011	0.107318891	0.371134021	99	0.117564881	0.143221653	1	-21.98525084
M7682	3B	490515716	0.107340481	0.24742268	99	0.117564881	0.143218455	1	-9.43920148
M1428	1B	18359071	0.107513637	0.144329897	99	0.117564881	0.143192827	1	-20.19339825
M1211	1B	118849938	0.107615884	0.12371134	99	0.117564881	0.143177716	1	13.36441297
M12760	6A	595918169	0.107623671	0.391752577	99	0.117564881	0.143176565	1	14.42622873
M11317	5B	373116658	0.107631324	0.226804124	99	0.117564881	0.143175435	1	-10.37932211
M14439	7A	36512654	0.107724438	0.12371134	99	0.117564881	0.14316169	1	-18.13159944
M11163	5B	519005204	0.107766294	0.350515464	99	0.117564881	0.143155515	1	-10.8997774
M9207	4A	23628409	0.107797092	0.309278351	99	0.117564881	0.143150974	1	10.44916706
M10276	5A	0	0.107802179	0.051546392	99	0.117564881	0.143150224	1	20.18622823
M4229	2B	219214772	0.10780608	0.350515464	99	0.117564881	0.143149649	1	-27.30204792
M4842	2B	601567299	0.107879024	0.226804124	99	0.117564881	0.143138899	1	-11.37636654
M3227	2A	758897731	0.107888442	0.453608247	99	0.117564881	0.143137512	1	14.33165802
M11646	5B	312563304	0.107999287	0.381443299	99	0.117564881	0.143121194	1	-8.143336719
M14625	7A	116530515	0.108015416	0.268041237	99	0.117564881	0.143118821	1	-9.812517107
M14926	7A	699922650	0.108047378	0.298969072	99	0.117564881	0.14311412	1	10.24418743
M2997	2A	711468133	0.108077311	0.484536082	99	0.117564881	0.143109719	1	-12.92438142
M13714	6B	0	0.108139748	0.391752577	99	0.117564881	0.143100543	1	17.44646027
M14598	7A	94404127	0.108396173	0.443298969	99	0.117564881	0.14306292	1	12.97457736
M6829	3A	70178225	0.108403713	0.340206186	99	0.117564881	0.143061815	1	19.78276802
M868	1B	5156091	0.108482512	0.432989691	99	0.117564881	0.143050275	1	9.70882739
M14209	7A	0	0.108528742	0.226804124	99	0.117564881	0.143043508	1	-11.18231649
M5930	2D	619962487	0.108580211	0.463917526	99	0.117564881	0.143035979	1	12.10519461
M3309	2A	765401712	0.108701243	0.278350515	99	0.117564881	0.143018289	1	-9.240704272
M11934	5D	437761268	0.108706229	0.381443299	99	0.117564881	0.143017561	1	20.66330599
M12098	6A	0	0.108706229	0.381443299	99	0.117564881	0.143017561	1	20.66330599
M7229	3B	0	0.108747338	0.18556701	99	0.117564881	0.143011557	1	13.03540397
M6071	3A	12868494	0.1087506	0.402061856	99	0.117564881	0.143011081	1	-10.75501718
M10863	5B	422121027	0.108847382	0.309278351	99	0.117564881	0.142996958	1	-12.37567301
M10862	5B	422525330	0.108979933	0.268041237	99	0.117564881	0.142977639	1	14.94722812
M9243	4A	719933935	0.10901424	0.154639175	99	0.117564881	0.142972643	1	-12.49595918
M3171	2A	648163092	0.109140175	0.453608247	99	0.117564881	0.142954319	1	12.33578142
M11869	5B	612532049	0.109220048	0.154639175	99	0.117564881	0.142942709	1	11.83947089
M1628	1B	144111278	0.109306548	0.494845361	99	0.117564881	0.142930146	1	-12.19458433
M15406	7B	509576259	0.109504462	0.432989691	99	0.117564881	0.142901445	1	8.385740809
M5279	2B	549670301	0.109513174	0.216494845	99	0.117564881	0.142900183	1	12.54765123
M550	1A	42812462	0.109612109	0.237113402	99	0.117564881	0.142885858	1	-11.43175823
M8157	3B	75766790	0.109623085	0.443298969	99	0.117564881	0.14288427	1	11.7985304
M13003	6B	17701756	0.109671458	0.381443299	99	0.117564881	0.142877272	1	-18.39655338
M463	1A	536653752	0.109785258	0.350515464	99	0.117564881	0.142860823	1	-20.12181798
M9696	4B	562337110	0.109788482	0.432989691	99	0.117564881	0.142860358	1	-11.79630881
M11433	5B	156196818	0.109843183	0.371134021	99	0.117564881	0.142852458	1	10.10763754
M12272	6A	24858910	0.109878984	0.391752577	99	0.117564881	0.14284729	1	9.70986038
M1655	1B	589090638	0.109923216	0.288659794	99	0.117564881	0.142840908	1	13.77275464
M9213	4A	14301407	0.109952444	0.288659794	99	0.117564881	0.142836692	1	10.68197039
M2953	2A	689761057	0.11001613	0.226804124	99	0.117564881	0.142827511	1	-9.01892131
M3000	2A	713536628	0.110034578	0.164948454	99	0.117564881	0.142824852	1	-12.64544572
M3342	2A	306905103	0.110041493	0.113402062	99	0.117564881	0.142823856	1	13.46562075
M4672	2B	697716067	0.110260593	0.360824742	99	0.117564881	0.142792322	1	11.76766384
M13040	6B	0	0.110321311	0.340206186	99	0.117564881	0.142783596	1	-14.3790408
M7785	3B	671011745	0.110383529	0.360824742	99	0.117564881	0.142774659	1	-22.57228069
M1735	1B	635977802	0.110626934	0.391752577	99	0.117564881	0.142739753	1	-14.01548598
M13198	6B	0	0.110655681	0.082474227	99	0.117564881	0.142735636	1	15.90554365
M1217	1B	2308496	0.110684445	0.474226804	99	0.117564881	0.142731518	1	15.28251825
M5058	2B	764073687	0.110733336	0.288659794	99	0.117564881	0.142724521	1	-11.45973271
M2954	2A	689761057	0.110864733	0.329896907	99	0.117564881	0.142705734	1	10.50034977
M10347	5A	565612395	0.110866504	0.257731959	99	0.117564881	0.142705481	1	-10.73593294
M1010	1B	39514123	0.110945589	0.340206186	99	0.117564881	0.142694185	1	-41.91809784
M1011	1B	270737840	0.110945589	0.340206186	99	0.117564881	0.142694185	1	-41.91809784
M10355	5A	567120913	0.110945589	0.340206186	99	0.117564881	0.142694185	1	-41.91809784
M11377	5B	99660656	0.110945589	0.340206186	99	0.117564881	0.142694185	1	-41.91809784
M1195	1B	111836824	0.110945589	0.340206186	99	0.117564881	0.142694185	1	-41.91809784
M4597	2B	0	0.110945589	0.340206186	99	0.117564881	0.142694185	1	-41.91809784
M1293	1B	420864193	0.110945589	0.340206186	99	0.117564881	0.142694185	1	41.91809784
M13708	6B	709011092	0.110945589	0.340206186	99	0.117564881	0.142694185	1	41.91809784
M2151	1D	417084354	0.110945589	0.340206186	99	0.117564881	0.142694185	1	41.91809784
M5913	2D	606124230	0.110945589	0.340206186	99	0.117564881	0.142694185	1	41.91809784
M6871	3A	741359064	0.110945589	0.340206186	99	0.117564881	0.142694185	1	41.91809784
M6805	3A	728990783	0.110956327	0.340206186	99	0.117564881	0.142692652	1	-20.12113094
M3819	2B	100325164	0.11096154	0.432989691	99	0.117564881	0.142691908	1	13.08737278
M1303	1B	399336171	0.111190369	0.103092784	99	0.117564881	0.14265928	1	-12.48260622
M12184	6A	625246005	0.111283888	0.360824742	99	0.117564881	0.142645967	1	-10.34275602
M2870	2A	553276886	0.111372476	0.175257732	99	0.117564881	0.142633368	1	12.19845433
M1859	1B	478429415	0.111418761	0.329896907	99	0.117564881	0.14262679	1	9.655329454
M13881	6D	452928272	0.111431416	0.278350515	99	0.117564881	0.142624992	1	12.37434517
M10108	5A	473093367	0.111440132	0.288659794	99	0.117564881	0.142623753	1	-13.69085285
M11064	5B	449452466	0.111450908	0.164948454	99	0.117564881	0.142622223	1	-10.69777692
M4453	2B	615886571	0.111485277	0.154639175	99	0.117564881	0.142617341	1	-12.78564594
M14818	7A	637874688	0.111505361	0.319587629	99	0.117564881	0.14261449	1	10.42145369
M5249	2B	765677047	0.111691273	0.030927835	99	0.117564881	0.14258812	1	-23.11994837
M505	1A	546799796	0.111989321	0.381443299	99	0.117564881	0.142545948	1	-8.287858053
M13140	6B	78208497	0.112006982	0.175257732	99	0.117564881	0.142543453	1	-12.17931854
M10257	5A	545129801	0.112027425	0.484536082	99	0.117564881	0.142540565	1	14.78984803
M9959	5A	54941693	0.112081504	0.453608247	99	0.117564881	0.142532929	1	-10.24469905
M15491	7B	206170311	0.112089491	0.206185567	99	0.117564881	0.142531802	1	-12.42280158
M8496	3D	596995100	0.112121594	0.257731959	99	0.117564881	0.142527272	1	10.65722101
M13333	6B	218963791	0.112248222	0.432989691	99	0.117564881	0.142509416	1	-12.75277478
M2858	2A	52393884	0.112427278	0.422680412	99	0.117564881	0.142484206	1	-10.3163676
M14408	7A	31106605	0.112585647	0.494845361	99	0.117564881	0.142461946	1	16.96211111
M5750	2D	588454274	0.112682688	0.268041237	99	0.117564881	0.142448323	1	11.67958849
M4441	2B	640489568	0.112690793	0.092783505	99	0.117564881	0.142447186	1	14.72976578
M9038	4A	657492476	0.112862121	0.453608247	99	0.117564881	0.142423169	1	-9.185365468
M5109	2B	746974042	0.112943764	0.24742268	99	0.117564881	0.142411738	1	9.930213887
M8115	3B	596722094	0.112968447	0.154639175	99	0.117564881	0.142408284	1	-11.64922012
M3734	2B	462272407	0.11296868	0.360824742	99	0.117564881	0.142408252	1	-9.307035029
M6921	3B	5973349	0.112988749	0.206185567	99	0.117564881	0.142405444	1	-12.03079183
M58	1A	362741398	0.1130016	0.144329897	99	0.117564881	0.142403646	1	-11.29190724
M13793	6B	467011945	0.113091072	0.24742268	99	0.117564881	0.142391138	1	-10.96567653
M3443	2B	564075186	0.113119337	0.402061856	99	0.117564881	0.142387188	1	8.767969507
M1713	1B	629664285	0.113160027	0.371134021	99	0.117564881	0.142381505	1	13.23950324
M10987	5B	476806091	0.113327007	0.360824742	99	0.117564881	0.142358205	1	-13.06032843
M4056	2B	0	0.113336712	0.484536082	99	0.117564881	0.142356852	1	-11.32545713
M1647	1B	404149662	0.113380581	0.432989691	99	0.117564881	0.142350738	1	-16.17489372
M7555	3B	495235808	0.113413115	0.309278351	99	0.117564881	0.142346205	1	11.98286035
M759	1B	13027114	0.113551732	0.381443299	99	0.117564881	0.142326909	1	-11.03139234
M8873	4A	45129083	0.113598599	0.381443299	99	0.117564881	0.142320391	1	-13.20517789
M1004	1B	95344234	0.11373707	0.340206186	99	0.117564881	0.14230115	1	14.51356582
M11005	5B	481080959	0.11379318	0.432989691	99	0.117564881	0.14229336	1	9.766893624
M4559	2B	0	0.11382045	0.226804124	99	0.117564881	0.142289576	1	-12.77051464
M7306	3B	537220619	0.113887362	0.18556701	99	0.117564881	0.142280296	1	-10.45876291
M13124	6B	51760224	0.113987079	0.051546392	99	0.117564881	0.142266477	1	20.9518999
M44	1A	1674029	0.114177584	0.195876289	99	0.117564881	0.142240113	1	11.61690465
M3551	2B	30630417	0.114479675	0.371134021	99	0.117564881	0.142198409	1	11.46458534
M4905	2B	757243772	0.114536177	0.391752577	99	0.117564881	0.142190622	1	13.57871684
M10731	5B	264879872	0.114606083	0.103092784	99	0.117564881	0.142180994	1	-14.32667189
M4688	2B	704576379	0.114631372	0.268041237	99	0.117564881	0.142177513	1	-10.56333354
M5948	2D	651419153	0.11468513	0.237113402	99	0.117564881	0.142170116	1	-12.57383998
M5505	2D	77635178	0.114709421	0.443298969	99	0.117564881	0.142166774	1	12.50801618
M5491	2D	79085779	0.114774562	0.030927835	99	0.117564881	0.142157818	1	23.27366215
M2609	2A	699092314	0.114797759	0.453608247	99	0.117564881	0.14215463	1	11.07183537
M14941	7A	701052545	0.114991592	0.422680412	99	0.117564881	0.142128018	1	-9.054066336
M1817	1B	659384608	0.115319704	0.412371134	99	0.117564881	0.142083086	1	-15.10333274
M8100	3B	702728099	0.115320458	0.06185567	99	0.117564881	0.142082983	1	-17.1631941
M3272	2A	768930684	0.115329646	0.412371134	99	0.117564881	0.142081726	1	8.413930124
M5770	2D	616636286	0.115397186	0.195876289	99	0.117564881	0.142072496	1	-11.20274122
M9184	4A	707676969	0.115408068	0.474226804	99	0.117564881	0.142071009	1	-13.4209359
M19	1A	1669927	0.115544803	0.216494845	99	0.117564881	0.142052343	1	10.42625377
M10861	5B	422525330	0.115560915	0.154639175	99	0.117564881	0.142050145	1	-12.73605378
M1408	1B	512275631	0.115607462	0.402061856	99	0.117564881	0.142043797	1	8.749223826
M849	1B	207966086	0.115639455	0.422680412	99	0.117564881	0.142039436	1	-12.32421937
M8062	3B	785499330	0.115734995	0.24742268	99	0.117564881	0.14202642	1	9.541615536
M13728	6B	708271328	0.115789622	0.092783505	99	0.117564881	0.142018983	1	-14.09476003
M2342	2A	15958158	0.115804085	0.463917526	99	0.117564881	0.142017015	1	-9.753101402
M6596	3A	659038151	0.116049825	0.360824742	99	0.117564881	0.141983614	1	-8.379432675
M14899	7A	693025273	0.116420421	0.257731959	99	0.117564881	0.141933392	1	-10.11993118
M2604	2A	83823849	0.116559233	0.288659794	99	0.117564881	0.141914626	1	-13.26874185
M3296	2A	31477695	0.116623995	0.216494845	99	0.117564881	0.14190588	1	-11.34158815
M842	1B	6202602	0.116790073	0.371134021	99	0.117564881	0.141883476	1	12.66976797
M4446	2B	626087891	0.116908087	0.06185567	99	0.117564881	0.141867577	1	16.38515817
M1283	1B	392145668	0.116942561	0.360824742	99	0.117564881	0.141862936	1	-12.44015815
M4655	2B	707465009	0.117455689	0.412371134	99	0.117564881	0.14179404	1	16.96249866
M642	1A	580452752	0.117521964	0.329896907	99	0.117564881	0.141785166	1	8.591108505
M3373	2A	646343478	0.117561095	0.309278351	99	0.117564881	0.141779929	1	15.1858584
M4751	2B	600038125	0.117593128	0.453608247	99	0.117564881	0.141775644	1	-13.9735894
M1146	1B	37570116	0.117621603	0.175257732	99	0.117564881	0.141771836	1	11.66252538
M16	1A	25564281	0.117658878	0.494845361	99	0.117564881	0.141766852	1	-9.15353021
M14583	7A	91721417	0.11768893	0.206185567	99	0.117564881	0.141762835	1	12.87993371
M9387	4A	739874789	0.117698386	0.463917526	99	0.117564881	0.141761572	1	13.30785275
M5497	2D	74936166	0.117722925	0.484536082	99	0.117564881	0.141758293	1	-9.502708141
M28	1A	1238067	0.117770273	0.051546392	99	0.117564881	0.141751969	1	17.86903954
M567	1A	567987926	0.117882148	0.381443299	99	0.117564881	0.141737037	1	-9.071379611
M3720	2B	73990357	0.117892765	0.051546392	99	0.117564881	0.141735621	1	-16.10700875
M7693	3B	684619731	0.118208351	0.288659794	99	0.117564881	0.141693592	1	-13.243758
M9202	4A	714077495	0.118244227	0.391752577	99	0.117564881	0.141688822	1	10.92457065
M11718	5B	658559642	0.118295798	0.402061856	99	0.117564881	0.141681968	1	10.46175296
M9724	4D	1206063	0.11844474	0.309278351	99	0.117564881	0.141662192	1	10.76440054
M2119	1D	544724962	0.118595899	0.432989691	99	0.117564881	0.14164215	1	11.35838514
M8547	4A	381110396	0.118661881	0.350515464	99	0.117564881	0.141633411	1	-9.258324723
M12694	6A	611545509	0.118760138	0.494845361	99	0.117564881	0.141620407	1	-12.62929278
M874	1B	2431679	0.118868915	0.432989691	99	0.117564881	0.141606024	1	-11.08568757
M750	1B	12374383	0.118915788	0.350515464	99	0.117564881	0.141599831	1	-10.46714945
M381	1A	504702998	0.119038488	0.443298969	99	0.117564881	0.141583633	1	10.35145983
M4568	2B	545270114	0.119042346	0.226804124	99	0.117564881	0.141583124	1	9.519991369
M7657	3B	626303943	0.119083344	0.164948454	99	0.117564881	0.141577716	1	-12.14272882
M11076	5B	592867962	0.119155442	0.371134021	99	0.117564881	0.141568211	1	12.62285288
M2266	1D	482503736	0.119195131	0.288659794	99	0.117564881	0.141562981	1	-8.838792838
M14689	7A	127293948	0.11923051	0.494845361	99	0.117564881	0.141558321	1	-8.998137836
M8743	4A	536854630	0.119247961	0.391752577	99	0.117564881	0.141556023	1	12.81717375
M13644	6B	458008990	0.119427719	0.453608247	99	0.117564881	0.141532373	1	14.36492829
M13679	6B	705935137	0.119471605	0.402061856	99	0.117564881	0.141526605	1	-9.445188604
M454	1A	537889263	0.119515503	0.175257732	99	0.117564881	0.141520838	1	-14.36896887
M12639	6A	574526055	0.119605415	0.175257732	99	0.117564881	0.141509033	1	-14.47687078
M7729	3B	289218941	0.119721176	0.432989691	99	0.117564881	0.141493849	1	-14.62343401
M15346	7B	157808881	0.119828418	0.422680412	99	0.117564881	0.141479798	1	-10.64097517
M11223	5B	9203817	0.119902286	0.18556701	99	0.117564881	0.141470127	1	-13.09626018
M10917	5B	455741036	0.119905434	0.278350515	99	0.117564881	0.141469715	1	14.44952194
M3733	2B	462272407	0.120023819	0.422680412	99	0.117564881	0.141454231	1	9.373316446
M10468	5A	618274809	0.120076376	0.226804124	99	0.117564881	0.141447363	1	9.038336375
M15435	7B	580883967	0.120132129	0.113402062	99	0.117564881	0.14144008	1	-15.87321377
M761	1B	25945971	0.12018974	0.443298969	99	0.117564881	0.141432559	1	-9.035088477
M2203	1D	433140936	0.120466895	0.288659794	99	0.117564881	0.141396431	1	-10.27056383
M45	1A	267772590	0.12051757	0.298969072	99	0.117564881	0.141389836	1	-15.90998026
M11144	5B	415769289	0.120548255	0.360824742	99	0.117564881	0.141385844	1	16.87520321
M2830	2A	579584012	0.120558122	0.350515464	99	0.117564881	0.141384561	1	10.62910483
M794	1B	0	0.12060462	0.474226804	99	0.117564881	0.141378514	1	-10.17629288
M13893	6D	7194101	0.120619456	0.391752577	99	0.117564881	0.141376585	1	9.787385968
M1925	1B	687334524	0.120679485	0.319587629	99	0.117564881	0.141368784	1	10.37816883
M14646	7A	251699115	0.120740055	0.453608247	99	0.117564881	0.141360917	1	12.6712518
M14713	7A	449335770	0.120740055	0.453608247	99	0.117564881	0.141360917	1	12.6712518
M14733	7A	540872088	0.120740055	0.453608247	99	0.117564881	0.141360917	1	12.6712518
M5516	2D	139037649	0.120768095	0.041237113	99	0.117564881	0.141357276	1	-16.86698278
M6410	3A	397200871	0.12082806	0.206185567	99	0.117564881	0.141349494	1	10.89824632
M14836	7A	13863804	0.120990462	0.226804124	99	0.117564881	0.141328439	1	11.08892131
M5977	2D	0	0.121034914	0.453608247	99	0.117564881	0.141322682	1	12.78861411
M13106	6B	42378167	0.121097823	0.195876289	99	0.117564881	0.141314538	1	10.51311093
M4885	2B	337709850	0.121146013	0.432989691	99	0.117564881	0.141308302	1	-9.100553508
M6112	3A	30196842	0.121192991	0.443298969	99	0.117564881	0.141302227	1	8.120240077
M5315	2B	0	0.121226075	0.082474227	99	0.117564881	0.14129795	1	14.45986725
M11676	5B	498302382	0.12124558	0.391752577	99	0.117564881	0.141295428	1	13.67085934
M11133	5B	0	0.121431403	0.319587629	99	0.117564881	0.141271433	1	-9.293795733
M3744	2B	72430081	0.121462983	0.309278351	99	0.117564881	0.141267359	1	9.531540326
M2742	2A	385281482	0.121472305	0.226804124	99	0.117564881	0.141266157	1	12.99287033
M9358	4A	729926047	0.121539557	0.216494845	99	0.117564881	0.141257486	1	11.90307743
M1071	1B	21849576	0.121555396	0.350515464	99	0.117564881	0.141255445	1	13.95201274
M14146	7A	738781676	0.121575847	0.309278351	99	0.117564881	0.14125281	1	-11.63872087
M14224	7A	507351841	0.121656265	0.329896907	99	0.117564881	0.141242452	1	10.0163769
M9690	4B	667731312	0.12169453	0.474226804	99	0.117564881	0.141237526	1	-11.63998474
M1725	1B	636134239	0.121699429	0.443298969	99	0.117564881	0.141236896	1	-11.61194575
M7396	3B	116111200	0.121898477	0.443298969	99	0.117564881	0.141211302	1	13.02313403
M4787	2B	734634084	0.121939071	0.432989691	99	0.117564881	0.141206089	1	-10.98402377
M4037	2B	235259300	0.1219572	0.12371134	99	0.117564881	0.141203761	1	-12.94827834
M4228	2B	180559587	0.122078567	0.309278351	99	0.117564881	0.141188187	1	-9.849554335
M11124	5B	698209017	0.122106934	0.402061856	99	0.117564881	0.141184549	1	11.36319527
M4141	2B	108313448	0.122141214	0.350515464	99	0.117564881	0.141180155	1	-19.35840002
M5005	2B	0	0.122225053	0.154639175	99	0.117564881	0.141169413	1	-10.88189716
M7273	3B	49148259	0.122242982	0.453608247	99	0.117564881	0.141167117	1	-11.75040755
M4326	2B	289305639	0.122382017	0.164948454	99	0.117564881	0.141149324	1	10.87335243
M11510	5B	0	0.1224074	0.340206186	99	0.117564881	0.141146078	1	-40.79019708
M14488	7A	50010206	0.1224074	0.340206186	99	0.117564881	0.141146078	1	-40.79019708
M6965	3B	10656805	0.1224074	0.340206186	99	0.117564881	0.141146078	1	-40.79019708
M1803	1B	655311824	0.1224074	0.340206186	99	0.117564881	0.141146078	1	40.79019708
M4946	2B	760153315	0.122419062	0.360824742	99	0.117564881	0.141144588	1	-11.88991066
M10873	5B	431870071	0.122443299	0.298969072	99	0.117564881	0.141141489	1	9.587044841
M1462	1B	543486036	0.122557129	0.443298969	99	0.117564881	0.141126947	1	-8.860250587
M6773	3A	58591208	0.122673837	0.340206186	99	0.117564881	0.141112053	1	-10.85710797
M8097	3B	702728099	0.122687281	0.453608247	99	0.117564881	0.141110339	1	10.91369678
M5735	2D	593851647	0.122700882	0.195876289	99	0.117564881	0.141108604	1	11.26089582
M14617	7A	116622717	0.122743081	0.288659794	99	0.117564881	0.141103224	1	-11.98675678
M1520	1B	562481285	0.122803849	0.206185567	99	0.117564881	0.141095481	1	-12.23575291
M4951	2B	762073843	0.122819172	0.134020619	99	0.117564881	0.141093529	1	-11.92729491
M14331	7A	22088450	0.122880846	0.350515464	99	0.117564881	0.141085675	1	9.108286013
M14283	7A	15605856	0.122953772	0.154639175	99	0.117564881	0.141076394	1	-11.52327926
M11984	5D	549030249	0.122995109	0.082474227	99	0.117564881	0.141071136	1	13.74792754
M4377	2B	649670177	0.123081012	0.453608247	99	0.117564881	0.141060216	1	12.4340919
M13065	6B	31488518	0.12309911	0.453608247	99	0.117564881	0.141057917	1	-11.35864302
M7616	3B	581268420	0.123106304	0.164948454	99	0.117564881	0.141057003	1	14.99005258
M4191	2B	704873966	0.123148104	0.113402062	99	0.117564881	0.141051693	1	15.42434863
M9498	4B	455378553	0.123165859	0.319587629	99	0.117564881	0.141049439	1	-12.52622427
M13496	6B	503848739	0.123177406	0.164948454	99	0.117564881	0.141047973	1	11.47272969
M10848	5B	420193748	0.123193367	0.175257732	99	0.117564881	0.141045946	1	10.91645128
M8036	3B	768723678	0.123216235	0.226804124	99	0.117564881	0.141043044	1	-12.82345149
M6096	3A	140700735	0.123248483	0.164948454	99	0.117564881	0.141038952	1	-13.38452059
M5283	2B	800756689	0.123356835	0.391752577	99	0.117564881	0.141025211	1	-19.68991811
M5341	2B	762160772	0.123356835	0.391752577	99	0.117564881	0.141025211	1	-19.68991811
M9988	5A	333414537	0.12336275	0.309278351	99	0.117564881	0.141024461	1	10.95989979
M11692	5B	634442505	0.123488587	0.309278351	99	0.117564881	0.141008521	1	-9.09082656
M1654	1B	584320517	0.123507104	0.030927835	99	0.117564881	0.141006177	1	-24.80740467
M12289	6A	14388578	0.123516231	0.381443299	99	0.117564881	0.141005022	1	11.77328531
M10139	5A	482358282	0.123553614	0.391752577	99	0.117564881	0.141000291	1	11.91960448
M5103	2B	773807439	0.123653433	0.041237113	99	0.117564881	0.140987667	1	-17.60079776
M9970	5A	174799515	0.123758346	0.474226804	99	0.117564881	0.140974412	1	11.1833247
M133	1A	46292062	0.123949994	0.381443299	99	0.117564881	0.14095023	1	11.12460356
M11751	5B	679651559	0.1240835	0.134020619	99	0.117564881	0.140933409	1	10.92498213
M5014	2B	765461493	0.12412733	0.350515464	99	0.117564881	0.140927891	1	-9.668117996
M2786	2A	566856432	0.124266784	0.195876289	99	0.117564881	0.14091035	1	10.31801304
M9824	5A	1243651	0.124396329	0.319587629	99	0.117564881	0.140894075	1	8.9363042
M5684	2D	0	0.124429978	0.381443299	99	0.117564881	0.140889851	1	-9.664668647
M9409	4A	1273632	0.124458254	0.237113402	99	0.117564881	0.140886302	1	-11.90615166
M6516	3A	481213917	0.1244685	0.371134021	99	0.117564881	0.140885016	1	-9.070057831
M557	1A	566590522	0.124810925	0.443298969	99	0.117564881	0.140842117	1	-10.83054679
M11726	5B	664683778	0.125035307	0.103092784	99	0.117564881	0.140814077	1	12.63868179
M14275	7A	13189977	0.125112016	0.474226804	99	0.117564881	0.140804505	1	12.1365569
M14281	7A	15080075	0.125112016	0.474226804	99	0.117564881	0.140804505	1	12.1365569
M6073	3A	13376403	0.125171756	0.412371134	99	0.117564881	0.140797054	1	13.66037388
M13787	6B	715680744	0.125188557	0.340206186	99	0.117564881	0.14079496	1	-9.809605569
M2645	2A	95654544	0.125211002	0.412371134	99	0.117564881	0.140792162	1	14.05830622
M3588	2B	25050436	0.125243622	0.453608247	99	0.117564881	0.140788097	1	8.548578999
M6947	3B	5857902	0.125268519	0.18556701	99	0.117564881	0.140784995	1	-12.62067512
M6975	3B	9094032	0.125288872	0.350515464	99	0.117564881	0.14078246	1	-10.50940555
M15236	7B	0	0.125420879	0.463917526	99	0.117564881	0.140766028	1	-13.53113713
M2439	2A	21812330	0.125532081	0.474226804	99	0.117564881	0.140752201	1	-18.28514633
M14015	6D	306139692	0.125608954	0.391752577	99	0.117564881	0.140742651	1	-10.18535345
M15564	7B	646603951	0.125668258	0.360824742	99	0.117564881	0.140735288	1	12.93668671
M8525	3D	612391994	0.125779537	0.453608247	99	0.117564881	0.140721482	1	13.04458201
M11922	5D	363181276	0.125806542	0.041237113	99	0.117564881	0.140718134	1	-19.82027627
M11261	5B	509489347	0.125833416	0.278350515	99	0.117564881	0.140714803	1	-9.34831358
M10047	5A	475372989	0.12583483	0.391752577	99	0.117564881	0.140714628	1	11.71498294
M1093	1B	180406792	0.125854359	0.309278351	99	0.117564881	0.140712207	1	-14.81515093
M299	1A	387369246	0.125984481	0.092783505	99	0.117564881	0.140696092	1	12.84814485
M2776	2A	384273168	0.126083802	0.474226804	99	0.117564881	0.140683804	1	-17.5419875
M199	1A	53457937	0.126259102	0.371134021	99	0.117564881	0.140662143	1	9.57386377
M8913	4A	330012453	0.126299665	0.144329897	99	0.117564881	0.140657136	1	13.3054647
M6380	3A	56796407	0.12633092	0.144329897	99	0.117564881	0.140653279	1	-13.43259211
M4836	2B	746680541	0.126592834	0.381443299	99	0.117564881	0.140620999	1	-9.473180541
M7326	3B	64795071	0.126663734	0.453608247	99	0.117564881	0.140612273	1	-10.81132613
M3512	2B	15410111	0.126668965	0.432989691	99	0.117564881	0.14061163	1	10.77063388
M2504	2A	33288813	0.126688738	0.412371134	99	0.117564881	0.140609198	1	-12.84212064
M8249	3D	3194034	0.126737568	0.391752577	99	0.117564881	0.140603193	1	8.857342432
M5216	2B	790104692	0.126777699	0.195876289	99	0.117564881	0.14059826	1	11.11381532
M10311	5A	0	0.126790002	0.463917526	99	0.117564881	0.140596748	1	-11.38980289
M12763	6A	391337338	0.126924051	0.453608247	99	0.117564881	0.140580285	1	-13.67716566
M6088	3A	7019713	0.126961674	0.237113402	99	0.117564881	0.140575668	1	9.496128017
M7182	3B	32277603	0.126979477	0.443298969	99	0.117564881	0.140573484	1	-14.34175139
M4303	2B	216469247	0.126987679	0.432989691	99	0.117564881	0.140572478	1	16.9065777
M14057	6D	682135943	0.127016871	0.24742268	99	0.117564881	0.140568897	1	9.629016751
M10208	5A	514092701	0.127033778	0.474226804	99	0.117564881	0.140566824	1	10.77172714
M6399	3A	478322209	0.127120782	0.494845361	99	0.117564881	0.14055616	1	-14.62176418
M543	1A	557295605	0.127202457	0.360824742	99	0.117564881	0.140546156	1	-11.97670859
M13894	6D	7194101	0.127264008	0.432989691	99	0.117564881	0.140538622	1	15.58971708
M1905	1B	676717313	0.127493544	0.432989691	99	0.117564881	0.140510562	1	-8.690175201
M6368	3A	502404422	0.127616504	0.072164948	99	0.117564881	0.140495555	1	16.63378518
M1290	1B	392530020	0.127676865	0.402061856	99	0.117564881	0.140488193	1	-17.16967604
M7277	3B	316402896	0.127696504	0.298969072	99	0.117564881	0.140485799	1	-9.529323277
M15163	7B	1747393	0.127714652	0.175257732	99	0.117564881	0.140483587	1	-10.63714416
M12800	6A	599927110	0.127846113	0.402061856	99	0.117564881	0.140467574	1	-11.0929909
M6424	3A	482497660	0.127857761	0.164948454	99	0.117564881	0.140466156	1	14.61968381
M10083	5A	0	0.127902639	0.350515464	99	0.117564881	0.140460694	1	9.214286701
M4272	2B	365499316	0.127979222	0.340206186	99	0.117564881	0.140451379	1	-8.206330258
M10541	5B	2625302	0.127980431	0.041237113	99	0.117564881	0.140451232	1	17.10590018
M10553	5B	9044910	0.128009904	0.350515464	99	0.117564881	0.140447648	1	-8.961006243
M1657	1B	73116851	0.128199743	0.113402062	99	0.117564881	0.14042459	1	11.52352959
M5695	2D	712007919	0.128215607	0.329896907	99	0.117564881	0.140422665	1	-12.63897229
M13192	6B	77434370	0.128256514	0.278350515	99	0.117564881	0.140417702	1	9.973364164
M3141	2A	755679306	0.12835867	0.329896907	99	0.117564881	0.140405316	1	13.15915508
M2563	2A	766594226	0.128366593	0.268041237	99	0.117564881	0.140404356	1	-14.2581011
M5862	2D	606625652	0.128384081	0.237113402	99	0.117564881	0.140402237	1	-11.53689854
M11216	5B	495473264	0.128480853	0.432989691	99	0.117564881	0.140390517	1	-12.68986344
M887	1B	0	0.128498728	0.195876289	99	0.117564881	0.140388353	1	10.33601613
M1840	1B	666942323	0.128519155	0.402061856	99	0.117564881	0.140385881	1	-10.84869721
M1761	1B	639941356	0.128655478	0.412371134	99	0.117564881	0.140369393	1	-14.7121053
M2325	2A	3539454	0.128734703	0.371134021	99	0.117564881	0.14035982	1	11.89744047
M2080	1D	40222148	0.128780863	0.360824742	99	0.117564881	0.140354245	1	-11.86050824
M3304	2A	0	0.128878639	0.329896907	99	0.117564881	0.140342445	1	-10.79553449
M2115	1D	472550886	0.128895162	0.412371134	99	0.117564881	0.140340452	1	10.07708555
M12446	6A	74106762	0.128897293	0.072164948	99	0.117564881	0.140340195	1	-14.80272616
M15319	7B	162339083	0.128926065	0.422680412	99	0.117564881	0.140336725	1	15.37768962
M6264	3A	387080506	0.128973191	0.18556701	99	0.117564881	0.140331043	1	-9.874233245
M7746	3B	684637596	0.12909927	0.350515464	99	0.117564881	0.140315854	1	25.20091971
M132	1A	16933203	0.129131547	0.144329897	99	0.117564881	0.140311969	1	-11.29052207
M2092	1D	612756863	0.129292636	0.432989691	99	0.117564881	0.140292592	1	-14.11908394
M13923	6D	14159200	0.129361863	0.350515464	99	0.117564881	0.140284273	1	12.05861208
M9114	4A	701293979	0.129366788	0.12371134	99	0.117564881	0.140283682	1	13.73289599
M652	1A	7014108	0.129533131	0.463917526	99	0.117564881	0.140263715	1	-7.751836929
M8153	3B	485683850	0.129543708	0.412371134	99	0.117564881	0.140262446	1	16.35110397
M3930	2B	144247105	0.1296143	0.103092784	99	0.117564881	0.140253982	1	-13.20205096
M4756	2B	727221588	0.129688858	0.195876289	99	0.117564881	0.140245048	1	11.35698292
M8849	4A	163167984	0.129750295	0.154639175	99	0.117564881	0.140237691	1	-10.89542862
M7359	3B	143666791	0.129875992	0.402061856	99	0.117564881	0.140222651	1	14.01772056
M498	1A	127504195	0.129945416	0.206185567	99	0.117564881	0.140214351	1	10.08583588
M14143	7A	4440321	0.130017432	0.340206186	99	0.117564881	0.140205747	1	-11.03781952
M3978	2B	174831753	0.130251522	0.092783505	99	0.117564881	0.140177815	1	-15.47098656
M6098	3A	140700735	0.130261627	0.144329897	99	0.117564881	0.14017661	1	13.53578392
M5352	2B	797277976	0.130332795	0.134020619	99	0.117564881	0.140168131	1	12.53731371
M11701	5B	634081712	0.130346754	0.360824742	99	0.117564881	0.140166468	1	-10.34112801
M6079	3A	0	0.130440816	0.412371134	99	0.117564881	0.14015527	1	14.89693922
M4341	2B	422190933	0.13048564	0.494845361	99	0.117564881	0.140149936	1	-12.29961636
M10034	5A	441486802	0.130497401	0.298969072	99	0.117564881	0.140148537	1	12.74972236
M7309	3B	537220619	0.130550444	0.422680412	99	0.117564881	0.14014223	1	11.65370267
M2819	2A	559553702	0.130670267	0.134020619	99	0.117564881	0.140127991	1	10.59143746
M4161	2B	680760736	0.130680398	0.484536082	99	0.117564881	0.140126788	1	11.23933322
M5999	2D	37152237	0.130698926	0.484536082	99	0.117564881	0.140124588	1	-11.2480279
M12216	6A	13672060	0.130713635	0.319587629	99	0.117564881	0.140122842	1	-11.18102933
M4969	2B	765063142	0.130837618	0.391752577	99	0.117564881	0.14010813	1	16.46672498
M10806	5B	389819412	0.13101205	0.103092784	99	0.117564881	0.140087459	1	-12.84390414
M5883	2D	605883075	0.131015013	0.381443299	99	0.117564881	0.140087108	1	15.14969309
M9818	4D	506347889	0.131115151	0.268041237	99	0.117564881	0.140075256	1	-9.563249048
M3089	2A	742581040	0.131181155	0.113402062	99	0.117564881	0.140067449	1	11.88931644
M3742	2B	48838344	0.131228379	0.494845361	99	0.117564881	0.140061866	1	-12.56170303
M13752	6B	92327256	0.131238494	0.474226804	99	0.117564881	0.140060671	1	11.97379177
M11793	5B	656472011	0.131253656	0.041237113	99	0.117564881	0.140058879	1	-20.25819371
M11744	5B	680852435	0.131253656	0.041237113	99	0.117564881	0.140058879	1	20.25819371
M11776	5B	684700913	0.131253656	0.041237113	99	0.117564881	0.140058879	1	20.25819371
M3463	2B	13418676	0.131281915	0.288659794	99	0.117564881	0.14005554	1	-10.65571222
M4410	2B	124973674	0.131306107	0.298969072	99	0.117564881	0.140052682	1	-12.11131028
M8421	3D	374395136	0.131337298	0.484536082	99	0.117564881	0.140048999	1	-12.3129061
M14712	7A	519254464	0.131339305	0.453608247	99	0.117564881	0.140048762	1	-9.340953802
M15541	7B	642273695	0.131359195	0.350515464	99	0.117564881	0.140046413	1	11.89363993
M1595	1B	587607110	0.131394855	0.350515464	99	0.117564881	0.140042204	1	-9.931040749
M10467	5A	618274809	0.131399441	0.453608247	99	0.117564881	0.140041662	1	-9.096153571
M12353	6A	50483728	0.131411567	0.494845361	99	0.117564881	0.140040231	1	11.41287892
M13639	6B	696194020	0.13144256	0.298969072	99	0.117564881	0.140036574	1	8.583465109
M921	1B	0	0.131448358	0.371134021	99	0.117564881	0.14003589	1	-16.25001288
M7545	3B	522161250	0.131548376	0.216494845	99	0.117564881	0.140024096	1	-9.664869016
M9037	4A	657492476	0.13156724	0.432989691	99	0.117564881	0.140021873	1	9.316754716
M2065	1D	26257862	0.131599221	0.237113402	99	0.117564881	0.140018105	1	-12.58064761
M13128	6B	76722170	0.131608372	0.329896907	99	0.117564881	0.140017027	1	-10.63341723
M1658	1B	73116851	0.131673367	0.278350515	99	0.117564881	0.140009372	1	-12.54404423
M14056	6D	446477288	0.131680856	0.391752577	99	0.117564881	0.14000849	1	9.26490161
M5418	2D	19068178	0.131772205	0.144329897	99	0.117564881	0.139997739	1	10.16643294
M2524	2A	35952052	0.131786119	0.391752577	99	0.117564881	0.139996103	1	12.59807324
M10064	5A	469896498	0.131864104	0.24742268	99	0.117564881	0.139986932	1	-8.444130047
M4945	2B	760153315	0.131874988	0.381443299	99	0.117564881	0.139985653	1	-10.90232601
M2532	2A	67087829	0.131878655	0.474226804	99	0.117564881	0.139985222	1	12.26082257
M4546	2B	566996002	0.132014346	0.381443299	99	0.117564881	0.139969283	1	-12.01834693
M4360	2B	549201886	0.132052882	0.484536082	99	0.117564881	0.13996476	1	-11.63451409
M12228	6A	16684480	0.13208403	0.216494845	99	0.117564881	0.139961105	1	-13.14328767
M816	1B	183264864	0.13209822	0.494845361	99	0.117564881	0.13995944	1	9.821997989
M797	1B	247051054	0.13209824	0.391752577	99	0.117564881	0.139959438	1	15.76028329
M10032	5A	436890364	0.132193696	0.278350515	99	0.117564881	0.139948244	1	-9.005830499
M6546	3A	0	0.132194039	0.402061856	99	0.117564881	0.139948204	1	-16.37011819
M2510	2A	51108076	0.132244815	0.412371134	99	0.117564881	0.139942253	1	9.489684115
M3903	2B	64912411	0.13240857	0.340206186	99	0.117564881	0.13992308	1	-9.916567456
M12736	6A	594854466	0.132453214	0.134020619	99	0.117564881	0.139917858	1	-13.09758884
M13661	6B	703823041	0.132610125	0.474226804	99	0.117564881	0.139899518	1	-10.93543922
M2416	2A	13723401	0.132628835	0.103092784	99	0.117564881	0.139897333	1	-13.88763041
M10133	5A	455967223	0.132633264	0.24742268	99	0.117564881	0.139896816	1	11.52667191
M9623	4B	0	0.132639321	0.340206186	99	0.117564881	0.139896109	1	10.97087613
M13751	6B	92327256	0.132682553	0.18556701	99	0.117564881	0.139891061	1	11.62353498
M6250	3A	0	0.132824661	0.340206186	99	0.117564881	0.139874484	1	17.85234577
M12540	6A	449964305	0.132885312	0.298969072	99	0.117564881	0.139867414	1	9.553713477
M10849	5B	664263082	0.132985696	0.24742268	99	0.117564881	0.139855722	1	10.23263603
M7025	3B	15100130	0.133039809	0.432989691	99	0.117564881	0.139849423	1	8.830955187
M2484	2A	347461965	0.13313323	0.412371134	99	0.117564881	0.139838556	1	12.12830104
M13144	6B	29496320	0.133166392	0.278350515	99	0.117564881	0.139834701	1	-10.39291466
M160	1A	15435331	0.13324202	0.340206186	99	0.117564881	0.139825912	1	10.80763897
M4893	2B	180417768	0.133302707	0.319587629	99	0.117564881	0.139818864	1	-12.99768002
M13865	6D	360642174	0.133334177	0.257731959	99	0.117564881	0.13981521	1	-13.92237882
M5411	2D	22205043	0.133407048	0.144329897	99	0.117564881	0.139806754	1	10.67084213
M13345	6B	486549528	0.133532281	0.278350515	99	0.117564881	0.139792234	1	9.585579927
M13167	6B	89695899	0.133561728	0.463917526	99	0.117564881	0.139788822	1	-8.591437828
M5517	2D	212311734	0.133591999	0.144329897	99	0.117564881	0.139785315	1	-10.78602746
M15496	7B	607525751	0.133640968	0.206185567	99	0.117564881	0.139779644	1	10.62542326
M11463	5B	243695786	0.133689827	0.494845361	99	0.117564881	0.139773989	1	10.94966283
M14859	7A	675528026	0.133721337	0.12371134	99	0.117564881	0.139770343	1	12.91690905
M15528	7B	531935983	0.133799885	0.18556701	99	0.117564881	0.139761258	1	-13.21978487
M8607	4A	63826057	0.133803581	0.278350515	99	0.117564881	0.13976083	1	-10.03337339
M3730	2B	78873105	0.133818497	0.494845361	99	0.117564881	0.139759106	1	12.00252236
M9190	4A	711885159	0.133848033	0.154639175	99	0.117564881	0.139755692	1	-13.51445745
M8746	4A	478288955	0.134014362	0.391752577	99	0.117564881	0.139736482	1	-11.77539025
M14213	7A	0	0.134043309	0.041237113	99	0.117564881	0.139733141	1	-18.07712252
M1926	1B	687334524	0.134309144	0.134020619	99	0.117564881	0.139702503	1	-11.63334258
M15327	7B	69218120	0.134389624	0.443298969	99	0.117564881	0.139693241	1	-12.51825982
M10100	5A	453278389	0.134415908	0.278350515	99	0.117564881	0.139690217	1	-11.58704406
M7288	3B	50022030	0.134457242	0.268041237	99	0.117564881	0.139685464	1	-9.184342695
M632	1A	669220097	0.134563738	0.288659794	99	0.117564881	0.139673224	1	-8.241852736
M13798	6B	0	0.134614874	0.391752577	99	0.117564881	0.139667351	1	11.67740118
M9925	5A	0	0.134627241	0.360824742	99	0.117564881	0.139665931	1	-15.49905915
M10389	5A	574714154	0.134701525	0.24742268	99	0.117564881	0.139657405	1	10.90947872
M7303	3B	538369580	0.134957517	0.06185567	99	0.117564881	0.139628063	1	14.61309102
M565	1A	568938181	0.135143743	0.402061856	99	0.117564881	0.139606758	1	-10.22647729
M8677	4A	374355718	0.135177797	0.257731959	99	0.117564881	0.139602865	1	9.385299935
M14240	7A	0	0.135208154	0.237113402	99	0.117564881	0.139599396	1	-10.54076364
M10292	5A	549041318	0.135254873	0.463917526	99	0.117564881	0.13959406	1	10.76685234
M13166	6B	109155311	0.135348707	0.041237113	99	0.117564881	0.139583347	1	-17.47659114
M6758	3A	338240084	0.135353074	0.113402062	99	0.117564881	0.139582849	1	-10.61619924
M3723	2B	149684945	0.135661983	0.371134021	99	0.117564881	0.139547643	1	-20.89240182
M4135	2B	347472378	0.135661983	0.371134021	99	0.117564881	0.139547643	1	-20.89240182
M3681	2B	628972455	0.1356993	0.422680412	99	0.117564881	0.139543396	1	-14.69675396
M97	1A	16408364	0.135762285	0.494845361	99	0.117564881	0.139536231	1	10.12786915
M3446	2B	15696396	0.135783128	0.309278351	99	0.117564881	0.139533861	1	9.875337163
M14010	6D	135430800	0.135812022	0.494845361	99	0.117564881	0.139530576	1	11.42869078
M10024	5A	423174439	0.135845576	0.381443299	99	0.117564881	0.139526762	1	-18.64887296
M2862	2A	562636225	0.135867108	0.164948454	99	0.117564881	0.139524315	1	9.757201221
M14512	7A	56245466	0.136108714	0.412371134	99	0.117564881	0.13949689	1	16.58200693
M9846	5A	10268070	0.136217148	0.24742268	99	0.117564881	0.1394846	1	-9.338798144
M5184	2B	781773910	0.136225153	0.422680412	99	0.117564881	0.139483693	1	-9.414551964
M3313	2A	763309825	0.136267947	0.443298969	99	0.117564881	0.139478846	1	9.240264295
M8783	4A	596971035	0.136289556	0.072164948	99	0.117564881	0.139476399	1	-13.85809805
M3605	2B	163007189	0.136309832	0.422680412	99	0.117564881	0.139474103	1	7.622867181
M8305	3D	19553185	0.136392968	0.422680412	99	0.117564881	0.139464695	1	17.11833933
M4054	2B	238397738	0.136431391	0.175257732	99	0.117564881	0.139460349	1	-10.95447407
M3796	2B	89437115	0.136472393	0.371134021	99	0.117564881	0.139455713	1	11.27629162
M1551	1B	581199944	0.13647628	0.113402062	99	0.117564881	0.139455273	1	12.25358746
M14282	7A	15080075	0.1366238	0.144329897	99	0.117564881	0.139438606	1	11.77138945
M1281	1B	442620108	0.136631234	0.226804124	99	0.117564881	0.139437767	1	10.66778144
M15048	7A	714340795	0.136637481	0.422680412	99	0.117564881	0.139437062	1	8.491751642
M7960	3B	760779117	0.136646094	0.412371134	99	0.117564881	0.139436089	1	14.91273505
M169	1A	2874382	0.136704197	0.402061856	99	0.117564881	0.139429532	1	-12.07506971
M1075	1B	326043338	0.136827433	0.360824742	99	0.117564881	0.139415633	1	10.13727947
M3523	2B	14970956	0.136915675	0.402061856	99	0.117564881	0.139405691	1	10.70734688
M3403	2B	798223	0.136932125	0.474226804	99	0.117564881	0.139403838	1	13.77082671
M7132	3B	24940760	0.137007089	0.278350515	99	0.117564881	0.139395398	1	-17.33985429
M5291	2B	795769119	0.137371113	0.154639175	99	0.117564881	0.139354488	1	10.84181094
[truncated: 13,601 more rows]
