# Supplementary material for: Genome-wide association study of drought tolerance and biomass allocation in wheat
Source: PLoS One. 2019 Dec 4;14(12):e0225383. doi: 10.1371/journal.pone.0225383 (PMC6892492; doi:10.1371/journal.pone.0225383)
Supplement: S11 Table — (CSV) [file pone.0225383.s011.csv]

SNP	Chromosome	Position	P.value	maf	nobs	Rsquare.of.Model.without.SNP	Rsquare.of.Model.with.SNP	FDR_Adjusted_P-values	effect
M1576	1B	420600926	0.000180918	0.381443299	99	-0.014777005	0.15539982	0.048780934	-264.3977239
M6687	3A	420562185	0.000251513	0.381443299	99	-0.014777005	0.147314261	0.035824352	142.5982468
M6540	3A	662527377	0.000429618	0.288659794	99	-0.014777005	0.134337313	0.030861901	-105.8285485
M6660	3A	699467553	0.000519155	0.391752577	99	-0.014777005	0.129797882	0.045494163	229.9687647
M788	1B	81660700	0.000524204	0.298969072	99	-0.014777005	0.129566502	0.032291379	115.8592372
M9150	4A	22270015	0.000562336	0.381443299	99	-0.014777005	0.12788977	0.046609819	241.3861393
M3933	2B	657506318	0.000763132	0.360824742	99	-0.014777005	0.120640633	0.031393686	-109.5070606
M6638	3A	695160174	0.00077491	0.06185567	99	-0.014777005	0.120278828	0.045048787	225.4881315
M12030	5D	561671357	0.000915191	0.06185567	99	-0.014777005	0.116359237	0.040389904	-181.2604803
M6088	3A	7019713	0.000939041	0.237113402	99	-0.014777005	0.115755026	0.032159709	114.9163178
M6697	3A	711287701	0.001084814	0.412371134	99	-0.014777005	0.112375055	0.030258573	-101.7312478
M14352	7A	0	0.001101822	0.350515464	99	-0.014777005	0.112011609	0.043823684	-213.3905823
M6714	3A	669396058	0.001178882	0.371134021	99	-0.014777005	0.110434406	0.034510658	-132.3317255
M1626	1B	614701448	0.001277839	0.144329897	99	-0.014777005	0.108558329	0.033244853	122.8022469
M13213	6B	141656076	0.001428199	0.463917526	99	-0.014777005	0.105977241	0.0331936	122.4238987
M3235	2A	0	0.001487437	0.134020619	99	-0.014777005	0.105036671	0.036692592	-149.5940373
M3990	2B	126899677	0.001690452	0.12371134	99	-0.014777005	0.102083891	0.034961283	135.8101416
M6677	3A	708320731	0.001785907	0.402061856	99	-0.014777005	0.100820046	0.040740038	-184.4167417
M6665	3A	701939041	0.001810641	0.412371134	99	-0.014777005	0.100503946	0.040333821	180.7574534
M3974	2B	159604259	0.001894485	0.360824742	99	-0.014777005	0.099464703	0.031196573	-108.1362429
M6674	3A	707348902	0.001913354	0.350515464	99	-0.014777005	0.099237381	0.032433686	116.8826677
M6702	3A	712285937	0.001951211	0.319587629	99	-0.014777005	0.098788224	0.03256235	-117.8118522
M1431	1B	554018133	0.002239747	0.350515464	99	-0.014777005	0.095635089	0.054382178	328.602362
M8582	4A	45140360	0.002239747	0.350515464	99	-0.014777005	0.095635089	0.054382178	328.602362
M6713	3A	669396058	0.002310713	0.319587629	99	-0.014777005	0.094923999	0.03246612	-117.116553
M6586	3A	662913097	0.002338151	0.391752577	99	-0.014777005	0.094655108	0.030323777	102.1701643
M15414	7B	309802071	0.002354145	0.041237113	99	-0.014777005	0.094499872	0.042504019	-200.7324006
M15245	7B	60498476	0.002447473	0.484536082	99	-0.014777005	0.093615255	0.032366806	116.401128
M1314	1B	348861564	0.002448789	0.391752577	99	-0.014777005	0.093603033	0.032428715	-116.846839
M817	1B	21249692	0.002512897	0.298969072	99	-0.014777005	0.093015703	0.030217031	101.4521084
M11356	5B	328787467	0.002529089	0.443298969	99	-0.014777005	0.092869813	0.034322449	-130.892276
M11392	5B	641807121	0.002589946	0.391752577	99	-0.014777005	0.092330009	0.0317115	111.7354694
M9780	4D	455472305	0.002789584	0.402061856	99	-0.014777005	0.090647206	0.034768286	-134.3148536
M6014	2D	0	0.002942063	0.092783505	99	-0.014777005	0.089443896	0.034169147	129.7256235
M14131	7A	4140180	0.003090946	0.360824742	99	-0.014777005	0.088329752	0.031592684	110.8997435
M7832	3B	733356572	0.003091164	0.463917526	99	-0.014777005	0.088328163	0.035774882	-142.204686
M6709	3A	614087671	0.00313097	0.360824742	99	-0.014777005	0.088039718	0.031756488	-112.0527246
M3883	2B	133979532	0.003133051	0.360824742	99	-0.014777005	0.088024742	0.028342797	89.25712798
M15338	7B	382617987	0.00337044	0.360824742	99	-0.014777005	0.086380888	0.029427703	-96.22107696
M4368	2B	459249657	0.003388438	0.103092784	99	-0.014777005	0.086261193	0.037263582	-154.2860603
M6705	3A	711688019	0.003581605	0.319587629	99	-0.014777005	0.085016521	0.030972058	-106.5853726
M4074	2B	236592763	0.003757454	0.463917526	99	-0.014777005	0.083942545	0.02723022	-82.38720855
M6759	3A	585937578	0.003767753	0.072164948	99	-0.014777005	0.083881272	0.036387814	-147.1192238
M6719	3A	714455841	0.003861174	0.371134021	99	-0.014777005	0.083333271	0.02865327	-91.22331851
M745	1B	2431679	0.003945404	0.288659794	99	-0.014777005	0.082850847	0.031517006	-110.3690755
M14192	7A	13842196	0.00395848	0.360824742	99	-0.014777005	0.082776915	0.047902943	-254.9657671
M1329	1B	505061911	0.003977556	0.298969072	99	-0.014777005	0.082669512	0.029478506	-96.55359108
M12122	6A	0	0.003984554	0.020618557	99	-0.014777005	0.082630245	0.053500286	-318.031181
M783	1B	530442292	0.004001754	0.402061856	99	-0.014777005	0.082534041	0.033927553	-127.8976523
M1589	1B	573008421	0.00407048	0.432989691	99	-0.014777005	0.082153855	0.03034048	102.28275
M7784	3B	527558091	0.004138819	0.371134021	99	-0.014777005	0.081782364	0.040836015	185.2866835
M7506	3B	130253586	0.004176525	0.257731959	99	-0.014777005	0.081580106	0.030036478	-100.2433372
M11337	5B	68317422	0.004457706	0.309278351	99	-0.014777005	0.080129112	0.029419952	-96.17039556
M2702	2A	510302235	0.004458843	0.381443299	99	-0.014777005	0.080123439	0.032304156	-115.9509463
M6695	3A	711289967	0.004556657	0.288659794	99	-0.014777005	0.079640989	0.030978736	106.6313428
M338	1A	3972705	0.004598823	0.020618557	99	-0.014777005	0.079436322	0.047679587	252.5936699
M1309	1B	462799871	0.004630034	0.103092784	99	-0.014777005	0.079286079	0.035469904	-139.7904511
M2638	2A	102903997	0.004685578	0.206185567	99	-0.014777005	0.079021287	0.028412889	-89.69914268
M13591	6B	675246263	0.004830781	0.257731959	99	-0.014777005	0.078344184	0.031275165	108.6817698
M3126	2A	751096174	0.004951622	0.030927835	99	-0.014777005	0.077796612	0.043323291	-208.545279
M1982	1D	305817	0.005199933	0.298969072	99	-0.014777005	0.076713749	0.031347501	-109.1850928
M785	1B	0	0.005240832	0.474226804	99	-0.014777005	0.07654056	0.053426813	79.2895659
M35	1A	2185082	0.005457446	0.030927835	99	-0.014777005	0.075646114	0.086222737	-206.5100117
M11346	5B	441021557	0.005525069	0.12371134	99	-0.014777005	0.075374428	0.065422826	-118.8929493
M12363	6A	0	0.005601755	0.103092784	99	-0.014777005	0.075070481	0.066703923	-123.5948138
M11479	5B	549711340	0.005601755	0.103092784	99	-0.014777005	0.075070481	0.066703923	123.5948138
M2163	1D	426987465	0.005634765	0.402061856	99	-0.014777005	0.074940976	0.066565764	-123.0833589
M2116	1D	472550886	0.005713009	0.340206186	99	-0.014777005	0.074637134	0.061333138	-104.4931608
M6696	3A	711289967	0.00579338	0.319587629	99	-0.014777005	0.074329506	0.060600422	102.0114197
M1627	1B	144111278	0.005850066	0.432989691	99	-0.014777005	0.074115193	0.069672337	134.8398494
M6073	3A	13376403	0.005858313	0.412371134	99	-0.014777005	0.074084195	0.067174708	125.3455934
M6023	3A	1286118	0.005872102	0.164948454	99	-0.014777005	0.074032465	0.063426162	111.7466132
M889	1B	630581864	0.005909705	0.402061856	99	-0.014777005	0.073892035	0.077529284	166.9663869
M781	1B	344369943	0.005924073	0.319587629	99	-0.014777005	0.073838621	0.061827574	-106.1846909
M11344	5B	548988047	0.005928848	0.12371134	99	-0.014777005	0.073820902	0.064617794	115.9849814
M2080	1D	40222148	0.005957492	0.360824742	99	-0.014777005	0.073714906	0.06235033	-107.9878806
M11482	5B	606870741	0.006180087	0.113402062	99	-0.014777005	0.072908864	0.064901841	117.0069169
M6640	3A	30035287	0.006186322	0.402061856	99	-0.014777005	0.072886724	0.06079049	-102.6523237
M6760	3A	585937578	0.006394573	0.06185567	99	-0.014777005	0.072160271	0.073322141	149.3371205
M200	1A	53457937	0.006726316	0.010309278	99	-0.014777005	0.071052425	0.108483827	-326.9094616
M5264	2B	800780319	0.006726316	0.010309278	99	-0.014777005	0.071052425	0.108483827	-326.9094616
M10586	5B	576692587	0.006726316	0.010309278	99	-0.014777005	0.071052425	0.108483827	326.9094616
M5260	2B	800780319	0.006726316	0.010309278	99	-0.014777005	0.071052425	0.108483827	326.9094616
M5094	2B	774088019	0.007026489	0.329896907	99	-0.014777005	0.070097974	0.061488767	-105.0241253
M5242	2B	31519188	0.007049381	0.030927835	99	-0.014777005	0.070026939	0.085299107	202.1093781
M6690	3A	420562185	0.007077144	0.371134021	99	-0.014777005	0.069941105	0.057695205	-92.46490919
M1336	1B	366877298	0.007256406	0.298969072	99	-0.014777005	0.069395209	0.057686721	-92.43771648
M9428	4A	733792535	0.007287443	0.329896907	99	-0.014777005	0.069302125	0.059900102	99.66728231
M848	1B	17621853	0.007358983	0.298969072	99	-0.014777005	0.069089123	0.059668716	-98.89876914
M6843	3A	805255592	0.007400608	0.319587629	99	-0.014777005	0.068966181	0.060901568	103.0278057
M2173	1D	415773502	0.007402873	0.402061856	99	-0.014777005	0.068959513	0.064259022	-114.7006099
M9766	4D	394378216	0.007553679	0.381443299	99	-0.014777005	0.068520196	0.057387139	-91.4801038
M2038	1D	25443095	0.007611986	0.288659794	99	-0.014777005	0.068352786	0.065864266	-120.5028192
M3271	2A	768930684	0.007620871	0.24742268	99	-0.014777005	0.068327393	0.058166515	93.98176226
M9162	4A	708083352	0.007686448	0.113402062	99	-0.014777005	0.068140924	0.066794386	-123.9302778
M9347	4A	18775545	0.007770315	0.340206186	99	-0.014777005	0.067904848	0.084143416	196.669845
M11477	5B	580847772	0.00778041	0.432989691	99	-0.014777005	0.067876612	0.065327272	118.5459003
M11480	5B	549711340	0.00778041	0.432989691	99	-0.014777005	0.067876612	0.065327272	118.5459003
M6700	3A	505333325	0.007898236	0.402061856	99	-0.014777005	0.067549836	0.055122564	84.40269666
M940	1B	171130928	0.007934213	0.391752577	99	-0.014777005	0.067451072	0.056724898	89.380946
M6462	3A	423845712	0.008084838	0.360824742	99	-0.014777005	0.067042579	0.085371551	202.4528245
M1273	1B	4383550	0.008155657	0.360824742	99	-0.014777005	0.066853253	0.058517604	95.11972154
M6630	3A	736712221	0.00852029	0.268041237	99	-0.014777005	0.065904835	0.060368755	101.2329593
M858	1B	36034202	0.008538054	0.288659794	99	-0.014777005	0.065859718	0.059476243	-98.26176405
M14247	7A	0	0.00854084	0.371134021	99	-0.014777005	0.065852651	0.056183393	87.68260028
M12292	6A	17317261	0.008792202	0.237113402	99	-0.014777005	0.065224749	0.055146847	-84.477075
M11347	5B	441021557	0.008828143	0.113402062	99	-0.014777005	0.065136503	0.063895429	-113.4062751
M11941	5D	490937616	0.008882008	0.484536082	99	-0.014777005	0.065004946	0.057557016	92.02250318
M9764	4D	370674103	0.009014227	0.268041237	99	-0.014777005	0.064685519	0.053825641	-80.47776857
M3714	2B	312640552	0.009290247	0.371134021	99	-0.014777005	0.064034165	0.054729625	83.20366364
M6643	3A	420552380	0.009318737	0.412371134	99	-0.014777005	0.063968086	0.051786564	-74.49578239
M852	1B	0	0.00936553	0.432989691	99	-0.014777005	0.063860014	0.063953926	113.6140188
M9059	4A	658897630	0.009373651	0.329896907	99	-0.014777005	0.063841317	0.062826613	-109.6439794
M7343	3B	70108166	0.009469699	0.06185567	99	-0.014777005	0.06362144	0.076286787	161.657609
M8688	4A	478992616	0.009514358	0.082474227	99	-0.014777005	0.063519996	0.065713392	119.9513844
M6249	3A	0	0.009580296	0.226804124	99	-0.014777005	0.063371124	0.05325053	-78.76719308
M847	1B	17621853	0.009598655	0.381443299	99	-0.014777005	0.063329863	0.057130044	-90.66227635
M2754	2A	413620700	0.009670905	0.175257732	99	-0.014777005	0.063168286	0.077808967	-168.1732044
M15540	7B	642273695	0.009732322	0.164948454	99	-0.014777005	0.063031923	0.058938191	-96.49195457
M11456	5B	546831358	0.009878504	0.432989691	99	-0.014777005	0.062710941	0.05757553	-92.08171334
M6691	3A	711365579	0.009897387	0.319587629	99	-0.014777005	0.062669842	0.058595414	-95.37284955
M11422	5B	440938538	0.010023706	0.134020619	99	-0.014777005	0.062396986	0.06205311	106.9607917
M10270	5A	434483981	0.010243271	0.164948454	99	-0.014777005	0.061931157	0.06077115	-102.5870187
M3807	2B	157603272	0.010295731	0.268041237	99	-0.014777005	0.061821404	0.058919526	96.43084947
M2257	1D	471927480	0.010322071	0.453608247	99	-0.014777005	0.061766516	0.067731648	127.4326711
M6013	2D	0	0.01059245	0.360824742	99	-0.014777005	0.06121142	0.083042113	191.5553476
M5184	2B	781773910	0.010612012	0.422680412	99	-0.014777005	0.061171835	0.05360434	-79.81736814
M749	1B	12374383	0.010722935	0.371134021	99	-0.014777005	0.060948807	0.058948975	96.52726861
M15304	7B	130505517	0.010762215	0.391752577	99	-0.014777005	0.060870405	0.07742401	106.5684869
M9179	4A	709851704	0.010793081	0.360824742	99	-0.014777005	0.060809009	0.071839826	91.7504098
M6783	3A	726107371	0.01079538	0.072164948	99	-0.014777005	0.060804443	0.08429968	126.3366415
M11439	5B	1207618	0.01081457	0.371134021	99	-0.014777005	0.060766371	0.069758348	-86.51070431
M6277	3A	41376359	0.010910299	0.381443299	99	-0.014777005	0.060577503	0.068574455	-83.59921513
M9739	4D	663571979	0.010911544	0.103092784	99	-0.014777005	0.06057506	0.079002779	-110.9589166
M3285	2A	642478723	0.011191858	0.278350515	99	-0.014777005	0.060031891	0.066094148	-77.66109094
M3687	2B	38782061	0.011263842	0.494845361	99	-0.014777005	0.059894702	0.069694912	86.35343536
M3831	2B	143000939	0.011375187	0.18556701	99	-0.014777005	0.059684294	0.072274305	-92.86355775
M12581	6A	525799703	0.011464872	0.432989691	99	-0.014777005	0.059516378	0.072008459	-92.18165652
M8177	3B	718878829	0.011478027	0.350515464	99	-0.014777005	0.059491862	0.116381222	-240.7926919
M10300	5A	4247107	0.011644615	0.154639175	99	-0.014777005	0.059183945	0.079107736	-111.2539352
M2399	2A	185003695	0.01172271	0.453608247	99	-0.014777005	0.059041179	0.084640865	-127.361351
M14922	7A	699917597	0.011933854	0.092783505	99	-0.014777005	0.058660112	0.084131849	125.8340995
M13119	6B	26195828	0.011934495	0.216494845	99	-0.014777005	0.058658967	0.071970779	92.08520993
M3803	2B	102028478	0.012123979	0.319587629	99	-0.014777005	0.058322971	0.132893933	313.9697322
M12515	6A	143013871	0.012271305	0.381443299	99	-0.014777005	0.058065507	0.091926124	150.2295506
M9782	4D	446124259	0.012321866	0.12371134	99	-0.014777005	0.057977893	0.074253103	98.01819091
M862	1B	16897282	0.012328619	0.278350515	99	-0.014777005	0.057966221	0.071325968	-90.4425536
M10511	5A	679723058	0.012410131	0.371134021	99	-0.014777005	0.057825844	0.087129802	134.9618213
M3193	2A	66819913	0.01243953	0.371134021	99	-0.014777005	0.05777545	0.069657727	86.26131505
M1146	1B	37570116	0.012595133	0.175257732	99	-0.014777005	0.057510789	0.074768668	99.38406502
M8428	3D	446942046	0.012595636	0.474226804	99	-0.014777005	0.05750994	0.073069977	-94.9194947
M2154	1D	418529908	0.012598799	0.432989691	99	-0.014777005	0.057504595	0.080288234	114.5991195
M6718	3A	714450654	0.012698424	0.371134021	99	-0.014777005	0.057336989	0.06990231	-86.86814161
M5573	2D	476041769	0.012848402	0.06185567	99	-0.014777005	0.057087249	0.084703305	-127.5493315
M796	1B	30846941	0.012856781	0.381443299	99	-0.014777005	0.057073388	0.066867492	79.48909341
M14227	7A	12838214	0.012963231	0.309278351	99	-0.014777005	0.056898094	0.073001628	-94.74200446
M6763	3A	780291542	0.013045904	0.072164948	99	-0.014777005	0.056762994	0.083304744	-123.3720961
M2693	2A	511924367	0.013064069	0.463917526	99	-0.014777005	0.056733428	0.096712549	166.281192
M2050	1D	42037018	0.013066021	0.329896907	99	-0.014777005	0.056730255	0.071882886	91.86043205
M3379	2A	612169049	0.013162554	0.402061856	99	-0.014777005	0.056573886	0.074189539	-97.85044844
M11312	5B	53062019	0.013170957	0.164948454	99	-0.014777005	0.05656033	0.072439122	-93.28757946
M3676	2B	6409896	0.01323392	0.484536082	99	-0.014777005	0.056459054	0.063824637	72.41927636
M6663	3A	702562913	0.013450185	0.329896907	99	-0.014777005	0.056114996	0.070676223	-88.80228367
M6724	3A	715199344	0.013481773	0.443298969	99	-0.014777005	0.056065228	0.063878347	-72.54121366
M13188	6B	124898676	0.013499882	0.134020619	99	-0.014777005	0.056036752	0.074371904	-98.33209015
M2345	2A	15529824	0.013668856	0.18556701	99	-0.014777005	0.055772956	0.089774925	143.2806609
M3903	2B	64912411	0.013729001	0.340206186	99	-0.014777005	0.055679883	0.067439336	-80.85447225
M14432	7A	0	0.013835643	0.494845361	99	-0.014777005	0.055515905	0.083712197	-124.5818999
M11440	5B	1207618	0.013841098	0.422680412	99	-0.014777005	0.055507553	0.075771554	102.06806
M8354	3D	42679365	0.013901138	0.329896907	99	-0.014777005	0.055415852	0.11085921	218.4846999
M6689	3A	420562185	0.013909739	0.371134021	99	-0.014777005	0.055402749	0.066874167	79.50496277
M7452	3B	221458347	0.013938233	0.453608247	99	-0.014777005	0.055359403	0.079908134	-113.5166208
M7089	3B	22917259	0.013958195	0.103092784	99	-0.014777005	0.055329091	0.081079529	116.8691566
M6741	3A	716528015	0.013972194	0.402061856	99	-0.014777005	0.05530786	0.072455617	-93.33007039
M9334	4A	720048127	0.013984235	0.412371134	99	-0.014777005	0.055289619	0.073952849	97.22709017
M345	1A	486815863	0.014027354	0.278350515	99	-0.014777005	0.055224426	0.096642021	-166.038761
M6747	3A	716847034	0.014074465	0.164948454	99	-0.014777005	0.055153436	0.069270546	85.30504188
M6817	3A	728057245	0.014156071	0.412371134	99	-0.014777005	0.055031056	0.080718979	115.832064
M10777	5B	398715853	0.014171214	0.402061856	99	-0.014777005	0.055008428	0.071842275	-91.75666697
M11135	5B	511056182	0.014302047	0.298969072	99	-0.014777005	0.054813978	0.064287008	-73.47234533
M7870	3B	415899188	0.014311027	0.309278351	99	-0.014777005	0.0548007	0.107213358	-204.3502959
M72	1A	10132748	0.014332921	0.154639175	99	-0.014777005	0.054768364	0.079638373	112.7514745
M12015	5D	0	0.014446424	0.072164948	99	-0.014777005	0.054601553	0.082504031	-121.0118233
M6563	3A	650055169	0.014473667	0.103092784	99	-0.014777005	0.054561719	0.076984917	105.3631547
M5988	2D	786225684	0.014523115	0.164948454	99	-0.014777005	0.054489618	0.068186512	-82.65600866
M2776	2A	384273168	0.014531245	0.474226804	99	-0.014777005	0.054477788	0.089627933	-142.8118464
M2770	2A	153448420	0.014599734	0.216494845	99	-0.014777005	0.054378408	0.07617389	103.1548705
M7396	3B	116111200	0.014604168	0.443298969	99	-0.014777005	0.05437199	0.078524566	109.6196891
M922	1B	0	0.014650417	0.18556701	99	-0.014777005	0.054305178	0.073095373	94.9854859
M14318	7A	19151787	0.014696745	0.298969072	99	-0.014777005	0.054238473	0.064231241	73.3449302
M1904	1B	680160129	0.014723084	0.288659794	99	-0.014777005	0.054200647	0.065228029	-75.63903475
M4234	2B	388778942	0.014871584	0.329896907	99	-0.014777005	0.053988703	0.065460718	-76.17965422
M851	1B	0	0.014923009	0.319587629	99	-0.014777005	0.053915826	0.064184726	-73.23873819
M7845	3B	701892192	0.014947113	0.350515464	99	-0.014777005	0.053881757	0.111962043	222.8533156
M8895	4A	635530599	0.014985756	0.412371134	99	-0.014777005	0.05382726	0.06420258	73.27948948
M10673	5B	353920901	0.014988504	0.319587629	99	-0.014777005	0.053823389	0.069231301	-85.20840879
M2953	2A	689761057	0.01499417	0.226804124	99	-0.014777005	0.053815412	0.064567653	-74.11523183
M8115	3B	596722094	0.015067882	0.154639175	99	-0.014777005	0.053711925	0.073405102	-95.7921605
M7717	3B	0	0.015170425	0.350515464	99	-0.014777005	0.053568841	0.069087692	84.85527559
M6672	3A	703907526	0.015351081	0.381443299	99	-0.014777005	0.053319215	0.062706824	-69.90481484
M11481	5B	606870741	0.01540326	0.103092784	99	-0.014777005	0.053247688	0.076667613	-104.4964078
M1476	1B	544133182	0.015574712	0.257731959	99	-0.014777005	0.053014444	0.079089251	111.2019501
M10509	5A	680512404	0.015742599	0.051546392	99	-0.014777005	0.052788646	0.086997051	134.5508776
M820	1B	500146991	0.015841744	0.422680412	99	-0.014777005	0.052656486	0.062521763	-69.49281503
M746	1B	2431679	0.015870357	0.360824742	99	-0.014777005	0.052618507	0.070663596	-88.77055559
M947	1B	711939962	0.015870357	0.360824742	99	-0.014777005	0.052618507	0.070663596	-88.77055559
M2019	1D	16297590	0.015901018	0.402061856	99	-0.014777005	0.052577889	0.071565917	91.05209743
M14854	7A	497467437	0.015909085	0.092783505	99	-0.014777005	0.052567216	0.077183325	105.9069441
M4628	2B	689711741	0.016051211	0.412371134	99	-0.014777005	0.052380102	0.065689223	-76.71242587
M6836	3A	33345150	0.016067375	0.051546392	99	-0.014777005	0.052358932	0.088170314	138.2045214
M11768	5B	683514701	0.016137831	0.309278351	99	-0.014777005	0.052266917	0.0682073	82.70641348
M182	1A	344675281	0.016207663	0.412371134	99	-0.014777005	0.052176131	0.062808534	70.13176784
M923	1B	385657223	0.01644176	0.381443299	99	-0.014777005	0.05187476	0.092164728	151.0104371
M1321	1B	0	0.016634797	0.134020619	99	-0.014777005	0.051629622	0.075473266	101.2660236
M6978	3B	494041030	0.016743878	0.319587629	99	-0.014777005	0.051492417	0.067200832	80.28358804
M6701	3A	712285937	0.016747628	0.319587629	99	-0.014777005	0.051487717	0.069998854	-87.10825794
M3021	2A	717007485	0.01674915	0.412371134	99	-0.014777005	0.05148581	0.071730236	-91.47069748
M11345	5B	441021557	0.016770751	0.453608247	99	-0.014777005	0.051458761	0.076198068	-103.2203669
M5042	2B	749345224	0.017072243	0.494845361	99	-0.014777005	0.051084996	0.065528798	-76.3381927
M3509	2B	0	0.017592098	0.257731959	99	-0.014777005	0.050456534	0.074286147	-98.10545041
M2083	1D	52602336	0.017618318	0.453608247	99	-0.014777005	0.050425355	0.086743746	-133.7684874
M7386	3B	48000913	0.017729289	0.453608247	99	-0.014777005	0.050293935	0.076276031	103.4316952
M14452	7A	609726833	0.017737512	0.360824742	99	-0.014777005	0.050284232	0.0737839	96.78335861
M1994	1D	8463818	0.017812573	0.350515464	99	-0.014777005	0.050195872	0.076540539	-104.1502951
M2014	1D	104987425	0.017812573	0.350515464	99	-0.014777005	0.050195872	0.076540539	-104.1502951
M6418	3A	512556910	0.017825797	0.12371134	99	-0.014777005	0.050180346	0.076680528	104.5316157
M10831	5B	37974769	0.017919224	0.154639175	99	-0.014777005	0.050070997	0.072049497	92.28675478
M6571	3A	655669363	0.017934932	0.371134021	99	-0.014777005	0.050052671	0.066314781	78.18044847
M2009	1D	17621853	0.018180551	0.381443299	99	-0.014777005	0.049768291	0.07828126	108.9414344
M8746	4A	478288955	0.018325533	0.391752577	99	-0.014777005	0.04960232	0.072935989	-94.57170704
M953	1B	8569664	0.018372037	0.360824742	99	-0.014777005	0.049549376	0.083996414	-125.4292912
M3340	2A	766578300	0.018430791	0.06185567	99	-0.014777005	0.049482688	0.081622558	-118.4398572
M4103	2B	391481609	0.018434191	0.432989691	99	-0.014777005	0.049478835	0.070814231	89.14942803
M11435	5B	0	0.018455657	0.422680412	99	-0.014777005	0.04945453	0.074137568	97.7134042
M758	1B	2358221	0.018545236	0.288659794	99	-0.014777005	0.049353427	0.070402987	88.11698894
M4551	2B	565077064	0.018695978	0.268041237	99	-0.014777005	0.049184445	0.077832248	107.6952684
M1272	1B	104575954	0.018755506	0.288659794	99	-0.014777005	0.049118108	0.070031193	-87.18876501
M7400	3B	422311619	0.01878295	0.12371134	99	-0.014777005	0.0490876	0.07683803	104.9614736
M12382	6A	0	0.01878756	0.319587629	99	-0.014777005	0.04908248	0.070132556	-87.44133956
M12639	6A	574526055	0.018875415	0.175257732	99	-0.014777005	0.048985156	0.079103308	-111.2414807
M2910	2A	677497860	0.018877611	0.175257732	99	-0.014777005	0.048982729	0.072583008	93.65854414
M6186	3A	320920365	0.019040648	0.402061856	99	-0.014777005	0.048803398	0.082671168	-121.5026128
M819	1B	500146991	0.019058268	0.412371134	99	-0.014777005	0.048784114	0.066621712	78.90582259
M610	1A	573393055	0.019115506	0.041237113	99	-0.014777005	0.048721599	0.095546903	162.2970775
M5881	2D	601401117	0.019134789	0.329896907	99	-0.014777005	0.048700584	0.06892172	-84.44806095
M6413	3A	509564298	0.019176665	0.391752577	99	-0.014777005	0.04865502	0.076502834	104.0477092
M1569	1B	592833254	0.019177408	0.278350515	99	-0.014777005	0.048654213	0.062754426	70.01098614
M1805	1B	565614324	0.019458848	0.216494845	99	-0.014777005	0.048350696	0.065948671	77.31959454
M3876	2B	730608229	0.019471881	0.350515464	99	-0.014777005	0.048336753	0.074916802	99.77826289
M794	1B	0	0.019581108	0.474226804	99	-0.014777005	0.048220284	0.067020084	-79.8522972
M10633	5B	28812335	0.019627009	0.164948454	99	-0.014777005	0.048171543	0.07112165	-89.92514043
M6767	3A	489299704	0.019741229	0.072164948	99	-0.014777005	0.048050776	0.080604722	115.5043758
M4476	2B	585896436	0.019825402	0.288659794	99	-0.014777005	0.047962248	0.066529809	-78.68827559
M6710	3A	614087671	0.019834784	0.309278351	99	-0.014777005	0.047952405	0.06950418	-85.88144029
M6699	3A	505333325	0.019875674	0.381443299	99	-0.014777005	0.047909564	0.066786733	79.29720299
M71	1A	10132748	0.019932341	0.268041237	99	-0.014777005	0.047850347	0.0678161	-81.7604159
M6849	3A	725268290	0.019937321	0.051546392	99	-0.014777005	0.047845151	0.088161377	-138.1765063
M3919	2B	158649496	0.019970443	0.453608247	99	-0.014777005	0.04781063	0.077831375	-107.6928519
M6819	3A	727518767	0.019978251	0.402061856	99	-0.014777005	0.0478025	0.073479776	-95.98715586
M9855	5A	23011096	0.020033312	0.309278351	99	-0.014777005	0.047745269	0.066541317	-78.71550091
M8683	4A	269059397	0.020211881	0.463917526	99	-0.014777005	0.047560796	0.069559743	-86.01880501
M3965	2B	165049205	0.020230441	0.443298969	99	-0.014777005	0.047541721	0.081736302	-118.7701888
M12531	6A	623438271	0.020245909	0.494845361	99	-0.014777005	0.047525838	0.05933682	62.59303381
M697	1A	491804002	0.020327661	0.463917526	99	-0.014777005	0.047442104	0.073351111	-95.65129839
M8154	3B	485683850	0.02037642	0.051546392	99	-0.014777005	0.047392332	0.08766353	-136.6203457
M8155	3B	75766790	0.02037642	0.051546392	99	-0.014777005	0.047392332	0.08766353	-136.6203457
M6172	3A	234640908	0.020421743	0.309278351	99	-0.014777005	0.047346179	0.067150691	-80.16382705
M12311	6A	23587868	0.020492866	0.443298969	99	-0.014777005	0.047273971	0.066653881	78.98204248
M12415	6A	60075194	0.020588271	0.412371134	99	-0.014777005	0.047177525	0.088283441	138.5593942
M8856	4A	483683726	0.020603254	0.474226804	99	-0.014777005	0.047162421	0.06060905	65.3059016
M5795	2D	744685545	0.020728912	0.350515464	99	-0.014777005	0.047036204	0.108448857	-209.087191
M825	1B	28701051	0.020797641	0.474226804	99	-0.014777005	0.04696751	0.068266779	-82.85072286
M7279	3B	0	0.021137408	0.319587629	99	-0.014777005	0.046631398	0.098012675	170.781945
M1918	1B	679383844	0.021200819	0.298969072	99	-0.014777005	0.0465693	0.100813692	-180.6826742
M283	1A	403145168	0.021200819	0.298969072	99	-0.014777005	0.0465693	0.100813692	-180.6826742
M6009	2D	761851219	0.021200819	0.298969072	99	-0.014777005	0.0465693	0.100813692	180.6826742
M14443	7A	352533828	0.021293841	0.474226804	99	-0.014777005	0.046478557	0.084689419	127.507515
M5876	2D	601405924	0.021384988	0.257731959	99	-0.014777005	0.046390048	0.069621032	86.17045441
M4547	2B	37117645	0.021442523	0.288659794	99	-0.014777005	0.046334383	0.067127309	80.1080108
M10267	5A	191346482	0.021511412	0.340206186	99	-0.014777005	0.04626794	0.074208001	97.89915511
M4516	2B	568309420	0.021537471	0.412371134	99	-0.014777005	0.046242865	0.07014102	87.4624466
M6270	3A	52210548	0.02168105	0.463917526	99	-0.014777005	0.046105278	0.065899921	77.20532656
M9151	4A	441240399	0.021689053	0.12371134	99	-0.014777005	0.046097636	0.073984841	97.31123087
M11177	5B	0	0.021702828	0.06185567	99	-0.014777005	0.046084492	0.086720954	133.6982033
M478	1A	540665432	0.022132387	0.319587629	99	-0.014777005	0.045678953	0.063797635	-72.35801408
M1978	1D	4243757	0.022250496	0.381443299	99	-0.014777005	0.045568904	0.068298979	82.92889772
M5054	2B	0	0.022313215	0.474226804	99	-0.014777005	0.045510715	0.0821855	-120.0792253
M11427	5B	13284590	0.022378443	0.216494845	99	-0.014777005	0.045450382	0.06675074	-79.21175559
M1798	1B	646777010	0.022385541	0.020618557	99	-0.014777005	0.045443827	0.107082748	-203.8527105
M15102	7A	720585870	0.022459957	0.041237113	99	-0.014777005	0.045375244	0.09138374	148.4620071
M9301	4A	0	0.02250246	0.164948454	99	-0.014777005	0.04533618	0.067810974	-81.74805581
M1355	1B	7319459	0.022580672	0.402061856	99	-0.014777005	0.045264499	0.080624162	-115.560098
M11536	5B	571473581	0.022601937	0.309278351	99	-0.014777005	0.045245055	0.063762659	-72.27869717
M6360	3A	480442075	0.022663532	0.432989691	99	-0.014777005	0.045188845	0.067647275	-81.35384464
M12380	6A	26881802	0.022812347	0.381443299	99	-0.014777005	0.045053699	0.0604999	65.07089565
M87	1A	14161158	0.022820681	0.463917526	99	-0.014777005	0.045046158	0.070920637	89.41754169
M11445	5B	651115539	0.022849423	0.134020619	99	-0.014777005	0.045020174	0.070926755	-89.43297115
M1311	1B	328983636	0.022860393	0.463917526	99	-0.014777005	0.045010265	0.075690173	-101.8489301
M6707	3A	710298658	0.022954065	0.371134021	99	-0.014777005	0.044925862	0.062282838	68.96269956
M2475	2A	21041620	0.022972005	0.474226804	99	-0.014777005	0.044909739	0.093906041	-156.7705711
M3935	2B	508735111	0.023002455	0.288659794	99	-0.014777005	0.044882402	0.068836575	-84.23953767
M15329	7B	147686272	0.023029613	0.12371134	99	-0.014777005	0.044858054	0.073403894	-95.78900654
M9324	4A	0	0.023071538	0.463917526	99	-0.014777005	0.044820525	0.068026046	82.26743092
M6552	3A	647019881	0.02311398	0.082474227	99	-0.014777005	0.044782607	0.07940572	-112.0936588
M9261	4A	410117076	0.023160316	0.164948454	99	-0.014777005	0.044741294	0.070689591	-88.83587926
M12376	6A	51553763	0.023178754	0.474226804	99	-0.014777005	0.044724879	0.067238079	80.37260881
M10967	5B	393940604	0.023218224	0.463917526	99	-0.014777005	0.044689786	0.062213122	-68.80840085
M4285	2B	154233621	0.023308076	0.381443299	99	-0.014777005	0.044610131	0.080872722	-116.2737269
M6477	3A	568024952	0.023346576	0.175257732	99	-0.014777005	0.044576101	0.066981407	79.76015822
M4000	2B	213709998	0.023356116	0.237113402	99	-0.014777005	0.044567677	0.064564335	-74.1076154
M7525	3B	536049099	0.023390476	0.030927835	99	-0.014777005	0.044537369	0.096536155	165.6751855
M207	1A	327958495	0.023431358	0.422680412	99	-0.014777005	0.044501368	0.067832851	81.80081113
M11671	5B	617684309	0.023489521	0.309278351	99	-0.014777005	0.044450265	0.082845567	122.0157849
M11972	5D	531606683	0.023784282	0.484536082	99	-0.014777005	0.044193318	0.0636669	72.0617618
M6391	3A	363608529	0.023921629	0.432989691	99	-0.014777005	0.044074738	0.073598368	-96.29723941
M6381	3A	56776160	0.023940741	0.484536082	99	-0.014777005	0.044058295	0.075130551	-100.3484397
M9845	5A	10268070	0.023967398	0.092783505	99	-0.014777005	0.044035382	0.07746012	106.667914
M8896	4A	635530599	0.024209601	0.298969072	99	-0.014777005	0.043828432	0.064326449	-73.56252546
M2706	2A	417084357	0.024251179	0.463917526	99	-0.014777005	0.043793127	0.085611291	130.2985448
M6860	3A	61704762	0.024369254	0.082474227	99	-0.014777005	0.043693211	0.077324065	-106.2935286
M12670	6A	478309953	0.024448275	0.381443299	99	-0.014777005	0.043626628	0.064439392	-73.82106995
M331	1A	474702375	0.024583194	0.319587629	99	-0.014777005	0.04351347	0.122017824	264.6817659
M10970	5B	472662963	0.024629945	0.391752577	99	-0.014777005	0.043474412	0.059279406	62.47196448
M3694	2B	68579934	0.024703787	0.453608247	99	-0.014777005	0.043412881	0.059687473	63.33501181
M3300	2A	0	0.024831833	0.278350515	99	-0.014777005	0.043306643	0.066923783	79.62298263
M667	1A	583451068	0.024869914	0.18556701	99	-0.014777005	0.043275159	0.066159121	-77.81385452
M702	1B	3572450	0.024938451	0.319587629	99	-0.014777005	0.043218624	0.065973088	-77.37685961
M733	1B	0	0.025012629	0.360824742	99	-0.014777005	0.04315762	0.065169758	75.50395344
M9208	4A	23628409	0.025099331	0.329896907	99	-0.014777005	0.043086559	0.063628205	-71.97419478
M12761	6A	595578856	0.025224656	0.494845361	99	-0.014777005	0.0429843	0.069646465	86.23342284
M12477	6A	226020901	0.025257139	0.412371134	99	-0.014777005	0.042957884	0.08907221	141.046374
M9856	5A	23011096	0.025262454	0.371134021	99	-0.014777005	0.042953565	0.060014682	-64.03132597
M3615	2B	48138841	0.025269137	0.391752577	99	-0.014777005	0.042948136	0.068816599	-84.19065397
M13171	6B	85384559	0.025274997	0.412371134	99	-0.014777005	0.042943376	0.060482387	65.03322821
M10116	5A	357980231	0.025278719	0.494845361	99	-0.014777005	0.042940354	0.062889697	70.31313665
M14446	7A	37283874	0.025293686	0.154639175	99	-0.014777005	0.042928205	0.084143932	125.8702465
M14459	7A	46522324	0.025293686	0.154639175	99	-0.014777005	0.042928205	0.084143932	125.8702465
M4108	2B	277093048	0.025403943	0.092783505	99	-0.014777005	0.042838942	0.073336578	-95.61339736
M6018	3A	717909949	0.025405498	0.432989691	99	-0.014777005	0.042837686	0.06902237	-84.69489097
M4275	2B	552907148	0.025438427	0.391752577	99	-0.014777005	0.042811108	0.059966158	-63.92782357
M284	1A	403145168	0.025468042	0.06185567	99	-0.014777005	0.042787236	0.080530337	115.291293
M6781	3A	719820906	0.02550834	0.329896907	99	-0.014777005	0.0427548	0.069390643	85.60108972
M8398	3D	226198112	0.025539544	0.288659794	99	-0.014777005	0.04272972	0.065737163	-76.82443661
M6827	3A	742590041	0.025643243	0.402061856	99	-0.014777005	0.042646609	0.079255998	-111.6713463
M9951	5A	64983046	0.025683353	0.391752577	99	-0.014777005	0.042614557	0.081936182	-119.3517842
M9704	4B	86304081	0.025751751	0.360824742	99	-0.014777005	0.042560022	0.094138659	157.5482147
M12826	6A	605151507	0.025842741	0.371134021	99	-0.014777005	0.042487712	0.062942837	70.43201246
M6706	3A	711688019	0.025847743	0.319587629	99	-0.014777005	0.042483744	0.06960236	-86.12424101
M3388	2A	588436341	0.02607718	0.412371134	99	-0.014777005	0.042302636	0.062231425	68.84889295
M971	1B	24539459	0.026109469	0.422680412	99	-0.014777005	0.042277283	0.069328253	85.44722843
M3971	2B	128269909	0.026453152	0.319587629	99	-0.014777005	0.042009472	0.065359644	-75.94458698
M13731	6B	707338714	0.026547235	0.206185567	99	-0.014777005	0.041936801	0.071360373	-90.52982929
M3792	2B	77236275	0.026602032	0.092783505	99	-0.014777005	0.0418946	0.076286574	-103.4602922
M10771	5B	278878242	0.026602461	0.474226804	99	-0.014777005	0.041894271	0.076285752	-103.4580617
M11484	5B	162710933	0.026639862	0.113402062	99	-0.014777005	0.041865521	0.073584726	96.2615437
M14440	7A	36512654	0.026656182	0.484536082	99	-0.014777005	0.041852989	0.08274306	-121.7140256
M3263	2A	773709829	0.026726884	0.474226804	99	-0.014777005	0.041798792	0.066492362	78.59971922
M2612	2A	0	0.026822039	0.360824742	99	-0.014777005	0.04172609	0.065036301	-75.19503039
M2049	1D	42037018	0.026993633	0.319587629	99	-0.014777005	0.041595673	0.072947286	94.60100485
M2747	2A	507314141	0.027226319	0.432989691	99	-0.014777005	0.04142022	0.074063772	97.51897432
M12034	5D	561671414	0.027226822	0.443298969	99	-0.014777005	0.041419842	0.063527578	71.74672385
M1250	1B	452770206	0.027333976	0.432989691	99	-0.014777005	0.04133958	0.065624909	-76.56228842
M11364	5B	179532863	0.027337363	0.432989691	99	-0.014777005	0.041337048	0.064825672	-74.70875978
M811	1B	0	0.027479397	0.443298969	99	-0.014777005	0.041231184	0.066495068	78.60611577
M3809	2B	104940392	0.027851833	0.463917526	99	-0.014777005	0.040956324	0.072918418	-94.52614454
M8741	4A	537445906	0.028104337	0.474226804	99	-0.014777005	0.04077218	0.065942142	77.30428597
M15143	7A	113229613	0.028243883	0.484536082	99	-0.014777005	0.040671164	0.070503718	88.36931961
M12651	6A	554716169	0.028285489	0.432989691	99	-0.014777005	0.040641148	0.073042355	-94.84774372
M14170	7A	11374457	0.028358033	0.164948454	99	-0.014777005	0.040588924	0.073038521	94.83778854
M12416	6A	60075194	0.028362869	0.432989691	99	-0.014777005	0.040585448	0.074947446	-99.85990593
M7550	3B	70932508	0.028425494	0.319587629	99	-0.014777005	0.040540487	0.070140535	-87.46123845
M4070	2B	200573662	0.02850735	0.175257732	99	-0.014777005	0.040481876	0.065373131	75.97593349
M6576	3A	660003685	0.028518191	0.309278351	99	-0.014777005	0.040474128	0.068119069	-82.49257852
M12765	6A	596176929	0.028541415	0.195876289	99	-0.014777005	0.040457538	0.065551293	76.39061391
M9111	4A	701045215	0.028652078	0.195876289	99	-0.014777005	0.040378685	0.074095777	-97.60327463
M11476	5B	549587494	0.028670237	0.474226804	99	-0.014777005	0.040365776	0.068994848	-84.62736128
M12483	6A	241374244	0.028696227	0.453608247	99	-0.014777005	0.040347316	0.074287251	98.10836627
M1624	1B	400908048	0.028743374	0.288659794	99	-0.014777005	0.040313874	0.060901862	-65.93843126
M12467	6A	756832399	0.028795699	0.381443299	99	-0.014777005	0.040276827	0.089122813	-141.2066798
M759	1B	13027114	0.028818278	0.381443299	99	-0.014777005	0.040260863	0.065057748	-75.2446316
M11444	5B	649097848	0.028966121	0.226804124	99	-0.014777005	0.040156659	0.063913669	-72.62145919
M10675	5B	153502375	0.029008679	0.381443299	99	-0.014777005	0.040126767	0.067401825	80.7645519
M2398	2A	3629061	0.02905329	0.195876289	99	-0.014777005	0.040095484	0.077468992	-106.6923502
M7834	3B	552424614	0.029073545	0.020618557	99	-0.014777005	0.040081296	0.10528683	197.0722955
M4483	2B	659369624	0.029105775	0.237113402	99	-0.014777005	0.040058743	0.067556236	-81.13502367
M12485	6A	317623793	0.029125078	0.329896907	99	-0.014777005	0.040045248	0.071810655	91.67591409
M12270	6A	219188654	0.029144435	0.422680412	99	-0.014777005	0.040031725	0.066562197	78.7649073
M6792	3A	726286900	0.029156146	0.082474227	99	-0.014777005	0.040023549	0.074702269	99.20762784
M1996	1D	8818793	0.029186381	0.371134021	99	-0.014777005	0.040002454	0.066255892	78.04165714
M13579	6B	660439989	0.029206658	0.103092784	99	-0.014777005	0.039988321	0.071525045	90.9481263
M10677	5B	37979682	0.029225907	0.360824742	99	-0.014777005	0.039974913	0.064179822	73.22754706
M3153	2A	757979334	0.029227387	0.360824742	99	-0.014777005	0.039973882	0.065115366	-75.37797026
M1270	1B	319687172	0.029343764	0.340206186	99	-0.014777005	0.039893024	0.06529062	-75.78426822
M5892	2D	605470853	0.029445949	0.340206186	99	-0.014777005	0.039822307	0.117759598	-246.5301848
M15279	7B	113767734	0.029447892	0.319587629	99	-0.014777005	0.039820965	0.067188935	-80.2551645
M12170	6A	94375972	0.02954879	0.041237113	99	-0.014777005	0.039751398	0.087594467	-136.4051658
M435	1A	520868188	0.029604171	0.453608247	99	-0.014777005	0.039713321	0.069688291	86.33702985
M9348	4A	18775545	0.029616373	0.020618557	99	-0.014777005	0.039704941	0.101985755	-184.9083409
M5922	2D	695112271	0.029625799	0.432989691	99	-0.014777005	0.039698471	0.075898729	-102.4109704
M15311	7B	162779025	0.029736948	0.164948454	99	-0.014777005	0.039622337	0.077115753	-105.7215877
M6725	3A	716226094	0.029753952	0.278350515	99	-0.014777005	0.039610717	0.066101888	77.67928125
M1119	1B	39854453	0.029864362	0.432989691	99	-0.014777005	0.039535434	0.071431769	90.71106859
M13872	6D	4373922	0.030030432	0.24742268	99	-0.014777005	0.039422753	0.074639688	99.0414765
M6723	3A	715199344	0.030031515	0.422680412	99	-0.014777005	0.03942202	0.06946985	85.79662244
M2473	2A	21041620	0.030141808	0.350515464	99	-0.014777005	0.039347552	0.068627584	83.72880413
M10917	5B	455741036	0.030149649	0.278350515	99	-0.014777005	0.03934227	0.076023096	102.7468649
M866	1B	496978998	0.030332388	0.360824742	99	-0.014777005	0.039219555	0.060790991	65.69857117
M2729	2A	179992753	0.030385895	0.18556701	99	-0.014777005	0.039183773	0.076391395	103.744805
M4286	2B	154233621	0.030577107	0.329896907	99	-0.014777005	0.039056444	0.065064569	75.26041246
M12254	6A	71319035	0.030595194	0.072164948	99	-0.014777005	0.039044444	0.077879306	107.8255344
M7804	3B	720217864	0.03062416	0.134020619	99	-0.014777005	0.039025241	0.070628802	88.68315779
M10630	5B	32418282	0.030683666	0.463917526	99	-0.014777005	0.038985853	0.064422255	-73.78181286
M7339	3B	519271810	0.030754872	0.443298969	99	-0.014777005	0.038938826	0.058837713	61.54447142
M15600	7B	0	0.03076596	0.06185567	99	-0.014777005	0.038931514	0.081971842	-119.455697
M7572	3B	364670841	0.030788539	0.371134021	99	-0.014777005	0.038916632	0.062766046	70.03691602
M14254	7A	0	0.03080796	0.103092784	99	-0.014777005	0.038903841	0.082373508	-120.6292416
M11471	5B	213514296	0.030949445	0.412371134	99	-0.014777005	0.038810912	0.061548349	-67.34576548
M744	1B	2431679	0.031138144	0.443298969	99	-0.014777005	0.038687672	0.061257114	-66.70993704
M3374	2A	646343478	0.031186818	0.381443299	99	-0.014777005	0.038656012	0.059088972	-62.07122885
M6921	3B	5973349	0.031375704	0.206185567	99	-0.014777005	0.038533644	0.068188317	-82.66038274
M8911	4A	32202337	0.031384593	0.340206186	99	-0.014777005	0.038527904	0.081256911	-117.3810768
M6748	3A	716847034	0.031470609	0.381443299	99	-0.014777005	0.038472456	0.08371895	124.6020006
M11509	5B	0	0.031498429	0.453608247	99	-0.014777005	0.038454557	0.071645143	-91.25380366
M3762	2B	434731139	0.03154729	0.051546392	99	-0.014777005	0.03842316	0.084232078	126.1340957
M1814	1B	656450092	0.031558149	0.453608247	99	-0.014777005	0.03841619	0.076345139	103.6192048
M6803	3A	695744712	0.031650912	0.051546392	99	-0.014777005	0.038356747	0.083967675	125.3434742
M1377	1B	471174490	0.031711746	0.453608247	99	-0.014777005	0.038317865	0.05790751	-59.61386117
M4753	2B	600038125	0.031771848	0.474226804	99	-0.014777005	0.038279529	0.062008175	68.35580106
M8088	3B	0	0.031796601	0.463917526	99	-0.014777005	0.038263763	0.060752755	65.61595018
M13756	6B	0	0.031958195	0.082474227	99	-0.014777005	0.038161155	0.073629151	-96.37781214
M832	1B	15519259	0.031986995	0.443298969	99	-0.014777005	0.038142926	0.060462291	64.99001938
M231	1A	261892580	0.032058493	0.412371134	99	-0.014777005	0.038097745	0.062675473	-69.83493134
M9776	4D	442739513	0.032091089	0.298969072	99	-0.014777005	0.038077183	0.065371491	-75.97212197
M1684	1B	615614208	0.032160105	0.412371134	99	-0.014777005	0.038033719	0.059375822	-62.67534685
M12102	6A	11577996	0.032235328	0.432989691	99	-0.014777005	0.037986459	0.077010476	-105.4331275
M4519	2B	680237252	0.032317551	0.154639175	99	-0.014777005	0.037934936	0.06849505	-83.40572143
M7509	3B	485581903	0.032326429	0.350515464	99	-0.014777005	0.037929381	0.068027493	-82.27092988
M4232	2B	605378316	0.032556568	0.06185567	99	-0.014777005	0.037785947	0.07786883	107.7965267
M15239	7B	57681594	0.032650738	0.12371134	99	-0.014777005	0.037727567	0.07139172	90.60937985
M1598	1B	400016805	0.032681597	0.340206186	99	-0.014777005	0.037708475	0.059558193	63.06094765
M15044	7A	712720093	0.032703036	0.103092784	99	-0.014777005	0.037695223	0.072069631	-92.3383421
M13725	6B	74684048	0.032735939	0.463917526	99	-0.014777005	0.037674901	0.063270634	71.16752168
M2457	2A	5928453	0.032780668	0.412371134	99	-0.014777005	0.03764731	0.069937323	86.95518515
M8151	3B	818871534	0.032790317	0.340206186	99	-0.014777005	0.037641363	0.122031322	-264.7403296
M3220	2A	0	0.032790317	0.340206186	99	-0.014777005	0.037641363	0.122031322	264.7403296
M3236	2A	0	0.032813649	0.237113402	99	-0.014777005	0.037626992	0.070235052	87.69711214
M9159	4A	708532867	0.032840439	0.381443299	99	-0.014777005	0.037610504	0.095246284	-161.2774137
M15294	7B	106140132	0.032901671	0.402061856	99	-0.014777005	0.037572871	0.063070157	-70.71724022
M11614	5B	590678073	0.033093284	0.371134021	99	-0.014777005	0.037455587	0.059332032	-62.58293312
M14000	6D	488198477	0.033129204	0.432989691	99	-0.014777005	0.037433682	0.062887043	70.30720426
M11434	5B	156196818	0.033142906	0.319587629	99	-0.014777005	0.037425332	0.057705755	-59.19918519
M15501	7B	0	0.033153901	0.443298969	99	-0.014777005	0.037418635	0.059068397	-62.02800858
M1602	1B	591090372	0.033229825	0.391752577	99	-0.014777005	0.037372452	0.063360198	-71.36914956
M10625	5B	29125387	0.033252505	0.144329897	99	-0.014777005	0.037358678	0.071751174	-91.52410623
M11462	5B	0	0.033503231	0.474226804	99	-0.014777005	0.037207071	0.068260551	-82.8356053
M629	1A	481552064	0.033616924	0.298969072	99	-0.014777005	0.037138722	0.059640849	63.23610535
M9874	5A	27509864	0.033620092	0.422680412	99	-0.014777005	0.037136821	0.058225573	-60.2705299
M7313	3B	53963394	0.033661461	0.371134021	99	-0.014777005	0.037112014	0.07010776	-87.379519
M10674	5B	353920901	0.033662156	0.319587629	99	-0.014777005	0.037111598	0.06405899	72.95207546
M12296	6A	19596674	0.033667792	0.154639175	99	-0.014777005	0.037108221	0.071181469	-90.0764726
M14097	6D	461702450	0.033746399	0.020618557	99	-0.014777005	0.037061184	0.104649342	194.6930641
M14162	7A	150861541	0.033746399	0.020618557	99	-0.014777005	0.037061184	0.104649342	194.6930641
M1020	1B	170576130	0.033780984	0.268041237	99	-0.014777005	0.037040525	0.069892367	-86.84343101
M6680	3A	709595134	0.03393221	0.113402062	99	-0.014777005	0.036950458	0.069588759	-86.09058472
M2404	2A	3954847	0.034000976	0.175257732	99	-0.014777005	0.036909644	0.086808105	-133.9670588
M2700	2A	160196749	0.034000976	0.175257732	99	-0.014777005	0.036909644	0.086808105	133.9670588
M1420	1B	221737181	0.034108661	0.412371134	99	-0.014777005	0.036845907	0.073280275	-95.4666434
M10574	5B	13944669	0.034140458	0.432989691	99	-0.014777005	0.036827127	0.06142135	-67.06812847
M3433	2B	17064831	0.034171512	0.412371134	99	-0.014777005	0.036808805	0.06759725	-81.23356786
M8480	3D	577418701	0.034175296	0.494845361	99	-0.014777005	0.036806573	0.056967471	57.69409271
M12555	6A	39131835	0.034196606	0.371134021	99	-0.014777005	0.036794012	0.06314004	-70.87403857
M5356	2B	791958920	0.034219669	0.103092784	99	-0.014777005	0.036780426	0.078902892	-110.6785124
M2796	2A	185345167	0.034244951	0.144329897	99	-0.014777005	0.036765544	0.089844485	-143.5027811
M6091	3A	19301043	0.034279511	0.463917526	99	-0.014777005	0.03674522	0.064439476	-73.82126251
M14337	7A	21081193	0.03447389	0.371134021	99	-0.014777005	0.036631316	0.087060957	134.7486249
M2453	2A	277923449	0.034517732	0.391752577	99	-0.014777005	0.036605719	0.068742682	84.00988961
M12404	6A	28011074	0.034525354	0.391752577	99	-0.014777005	0.036601273	0.061166266	66.51221405
M12806	6A	689032602	0.034606979	0.309278351	99	-0.014777005	0.03655372	0.079244749	111.639649
M7632	3B	437778419	0.034799276	0.381443299	99	-0.014777005	0.036442163	0.084664555	127.4326564
M9692	4B	661245757	0.034906041	0.412371134	99	-0.014777005	0.036380509	0.063400799	-71.46064575
M3690	2B	69047995	0.034949739	0.494845361	99	-0.014777005	0.036355333	0.061616346	67.49465117
M8123	3B	322735845	0.034982558	0.381443299	99	-0.014777005	0.036336446	0.090690699	146.2187188
M12823	6A	605225151	0.035037815	0.432989691	99	-0.014777005	0.036304689	0.081194468	117.2007397
M10922	5B	455980608	0.035084739	0.051546392	99	-0.014777005	0.036277763	0.082970345	-122.3836103
M13475	6B	576042248	0.035088024	0.412371134	99	-0.014777005	0.03627588	0.065999175	77.43806317
M10860	5B	398970101	0.035121444	0.06185567	99	-0.014777005	0.036256728	0.079269013	111.7080244
M13495	6B	503848739	0.035182966	0.412371134	99	-0.014777005	0.036221523	0.075267242	100.713914
M2647	2A	100985631	0.035262686	0.257731959	99	-0.014777005	0.036176001	0.066560564	-78.76104277
M13137	6B	77458408	0.035279298	0.298969072	99	-0.014777005	0.03616653	0.072945178	-94.59553825
M15228	7B	566343875	0.035283772	0.298969072	99	-0.014777005	0.036163979	0.065311642	75.83307772
M4621	2B	665938471	0.035412258	0.453608247	99	-0.014777005	0.036090888	0.062336476	69.08153426
M6595	3A	659038151	0.035497477	0.319587629	99	-0.014777005	0.036042567	0.067276064	80.4634459
M10990	5B	584276433	0.035520082	0.309278351	99	-0.014777005	0.036029769	0.063437301	71.54295483
M6780	3A	722446569	0.035526289	0.381443299	99	-0.014777005	0.036026257	0.077092307	105.6573114
M12534	6A	623438271	0.035657215	0.164948454	99	-0.014777005	0.035952321	0.066500044	78.61788204
M2096	1D	366012746	0.035702075	0.443298969	99	-0.014777005	0.035927054	0.076594959	-104.2984481
M3811	2B	63706836	0.035716349	0.113402062	99	-0.014777005	0.035919022	0.075695572	-101.863461
M4289	2B	143000173	0.035999102	0.134020619	99	-0.014777005	0.035760608	0.069874272	-86.79846926
M3177	2A	758417987	0.036033522	0.402061856	99	-0.014777005	0.035741415	0.062000983	68.33994476
M255	1A	381273827	0.036067609	0.195876289	99	-0.014777005	0.035722427	0.072331968	-93.01179633
M3316	2A	767324605	0.036153417	0.319587629	99	-0.014777005	0.035674711	0.057955028	-59.71173766
M1110	1B	744753328	0.036191202	0.226804124	99	-0.014777005	0.035653738	0.070060394	-87.26148985
M12479	6A	199016535	0.036222663	0.072164948	99	-0.014777005	0.035636293	0.081048036	-116.7783857
M6844	3A	805255592	0.036241223	0.360824742	99	-0.014777005	0.035626009	0.06233536	-69.07906019
M6565	3A	651997752	0.036354862	0.360824742	99	-0.014777005	0.035563166	0.066513895	78.65063592
M4002	2B	213709998	0.036355011	0.453608247	99	-0.014777005	0.035563083	0.056801011	-57.35741902
M3563	2B	419250206	0.036404169	0.350515464	99	-0.014777005	0.035535963	0.059362414	-62.64704293
M15256	7B	63170180	0.036424175	0.237113402	99	-0.014777005	0.035524937	0.062779614	-70.06719968
M12011	5D	552080511	0.036448972	0.484536082	99	-0.014777005	0.03551128	0.065796368	-76.96288112
M11505	5B	553933479	0.036537888	0.443298969	99	-0.014777005	0.035462389	0.072043838	92.27225913
M8854	4A	301817649	0.036537968	0.402061856	99	-0.014777005	0.035462345	0.064587346	74.16044827
M11133	5B	0	0.036679664	0.319587629	99	-0.014777005	0.035384694	0.060757204	-65.62556226
M966	1B	50203925	0.03670797	0.134020619	99	-0.014777005	0.03536922	0.073865929	96.99867398
M1287	1B	462987278	0.036767903	0.350515464	99	-0.014777005	0.035336499	0.100875202	-180.9032249
M6134	3A	430569956	0.036777296	0.494845361	99	-0.014777005	0.035331377	0.058655742	-61.16437418
M5276	2B	792988297	0.036805749	0.164948454	99	-0.014777005	0.035315866	0.068600706	83.66323216
M9357	4A	729926047	0.036890821	0.391752577	99	-0.014777005	0.035269569	0.066221649	-77.96101067
M14423	7A	35387463	0.036958536	0.154639175	99	-0.014777005	0.035232799	0.080365737	114.8204731
M7713	3B	677309290	0.03697426	0.278350515	99	-0.014777005	0.035224271	0.06562682	-76.56674725
M6207	3A	603025700	0.037027366	0.24742268	99	-0.014777005	0.035195497	0.075060509	100.1614212
M12447	6A	0	0.037099275	0.391752577	99	-0.014777005	0.035156605	0.085061672	128.6308972
M9005	4A	668285271	0.037100347	0.443298969	99	-0.014777005	0.035156026	0.065927234	77.26933675
M15226	7B	474475078	0.037145762	0.154639175	99	-0.014777005	0.035131505	0.07078992	-89.08822769
M6559	3A	651994615	0.037159096	0.134020619	99	-0.014777005	0.035124312	0.068035359	82.28995733
M1057	1B	48462498	0.03717325	0.432989691	99	-0.014777005	0.03511668	0.065699225	76.73578906
M2094	1D	732056365	0.037301872	0.154639175	99	-0.014777005	0.035047462	0.089230592	-141.5484202
M2750	2A	561848369	0.037301872	0.154639175	99	-0.014777005	0.035047462	0.089230592	141.5484202
M9339	4A	0	0.03733066	0.484536082	99	-0.014777005	0.035032004	0.067097842	-80.03769644
M5852	2D	613237565	0.037341385	0.360824742	99	-0.014777005	0.035026249	0.061350985	-66.9145482
M1787	1B	608599570	0.037366142	0.041237113	99	-0.014777005	0.03501297	0.086014891	-131.5299814
M13595	6B	47980535	0.037410761	0.391752577	99	-0.014777005	0.034989062	0.066214405	77.94395543
M12286	6A	14388578	0.037464931	0.453608247	99	-0.014777005	0.034960077	0.067207368	80.29920677
M10747	5B	228277789	0.037562254	0.175257732	99	-0.014777005	0.034908113	0.063093856	-70.77039428
M13842	6B	0	0.037595379	0.422680412	99	-0.014777005	0.03489046	0.057268389	-58.30521662
M6461	3A	423845712	0.037604838	0.051546392	99	-0.014777005	0.034885422	0.082464818	120.8968214
M11488	5B	229364483	0.03763006	0.453608247	99	-0.014777005	0.034871994	0.068165061	82.60401029
M8496	3D	596995100	0.037668407	0.257731959	99	-0.014777005	0.034851599	0.063577886	71.86040257
M14364	7A	27004883	0.037801563	0.391752577	99	-0.014777005	0.034780948	0.061310764	-66.82684036
M13670	6B	698461241	0.037953497	0.453608247	99	-0.014777005	0.034700657	0.059904496	-63.79641923
M8621	4A	127984307	0.037960555	0.020618557	99	-0.014777005	0.034696936	0.099881474	-177.3566031
M6715	3A	579047670	0.037998054	0.381443299	99	-0.014777005	0.034677176	0.062313434	-69.03047272
M6867	3A	0	0.038019813	0.072164948	99	-0.014777005	0.03466572	0.076294901	-103.4828775
M6769	3A	0	0.038126307	0.402061856	99	-0.014777005	0.034609751	0.076578635	-104.2539961
M10156	5A	268836139	0.038230042	0.381443299	99	-0.014777005	0.034555392	0.058649961	-61.15231863
M7841	3B	735392487	0.038263015	0.340206186	99	-0.014777005	0.034538146	0.118467411	-249.5027101
M7846	3B	701892192	0.038263015	0.340206186	99	-0.014777005	0.034538146	0.118467411	-249.5027101
M8600	4A	4240767	0.038263015	0.340206186	99	-0.014777005	0.034538146	0.118467411	-249.5027101
M8888	4A	34990198	0.038263015	0.340206186	99	-0.014777005	0.034538146	0.118467411	-249.5027101
M14868	7A	670917940	0.038263015	0.340206186	99	-0.014777005	0.034538146	0.118467411	249.5027101
M7044	3B	126502584	0.038263015	0.340206186	99	-0.014777005	0.034538146	0.118467411	249.5027101
M7839	3B	734436502	0.038263015	0.340206186	99	-0.014777005	0.034538146	0.118467411	249.5027101
M7843	3B	738156377	0.038263015	0.340206186	99	-0.014777005	0.034538146	0.118467411	249.5027101
M8791	4A	525578987	0.038263015	0.340206186	99	-0.014777005	0.034538146	0.118467411	249.5027101
M9680	4B	0	0.038263015	0.340206186	99	-0.014777005	0.034538146	0.118467411	249.5027101
M9681	4B	108226085	0.038263015	0.340206186	99	-0.014777005	0.034538146	0.118467411	249.5027101
M3281	2A	773395688	0.038331674	0.474226804	99	-0.014777005	0.034502287	0.08322765	123.1438518
M2759	2A	437977326	0.03837065	0.474226804	99	-0.014777005	0.034481961	0.085064176	-128.638472
M6879	3A	757610977	0.038383149	0.268041237	99	-0.014777005	0.034475448	0.06087551	65.88138082
M4493	2B	655597649	0.038413523	0.453608247	99	-0.014777005	0.034459629	0.074482535	-98.62485391
M8113	3B	720851922	0.038419054	0.443298969	99	-0.014777005	0.03445675	0.071698846	-91.39065779
M6542	3A	501061731	0.038422221	0.175257732	99	-0.014777005	0.034455102	0.063136275	70.86558584
M894	1B	178656968	0.038613128	0.443298969	99	-0.014777005	0.034356003	0.06458034	-74.14436077
M4231	2B	605378316	0.038664565	0.329896907	99	-0.014777005	0.034329393	0.086105847	-131.8083009
M3827	2B	116410710	0.038764303	0.288659794	99	-0.014777005	0.0342779	0.074998374	-99.9956639
M13665	6B	462690299	0.038767267	0.278350515	99	-0.014777005	0.034276372	0.062883515	70.29931522
M9823	5A	1243651	0.038787389	0.494845361	99	-0.014777005	0.034266002	0.061206985	66.60080092
M11516	5B	562373770	0.038794068	0.12371134	99	-0.014777005	0.034262561	0.069929329	86.93530727
M10140	5A	482358282	0.038965844	0.319587629	99	-0.014777005	0.034174281	0.060280461	-64.59971413
M9368	4A	9881884	0.038984177	0.432989691	99	-0.014777005	0.034164883	0.061850058	-68.00763956
M2149	1D	77126636	0.039003851	0.206185567	99	-0.014777005	0.034154804	0.064552569	-74.0806082
M11348	5B	441021557	0.039167832	0.443298969	99	-0.014777005	0.034071003	0.070285749	-87.82376048
M12032	5D	711579175	0.03916808	0.371134021	99	-0.014777005	0.034070877	0.078330637	109.0789102
M12238	6A	71414592	0.039170373	0.298969072	99	-0.014777005	0.034069708	0.074356821	98.29221075
M14457	7A	38327804	0.039177185	0.371134021	99	-0.014777005	0.034066235	0.066448641	78.49638979
M1325	1B	16677697	0.039197078	0.113402062	99	-0.014777005	0.034056097	0.072353231	93.06649052
M12381	6A	0	0.03922814	0.18556701	99	-0.014777005	0.034040277	0.066133088	-77.75262811
M14320	7A	0	0.03936557	0.371134021	99	-0.014777005	0.033970448	0.059347392	-62.61534212
M4394	2B	561223406	0.039398214	0.24742268	99	-0.014777005	0.0339539	0.063712651	72.16536692
M968	1B	186541242	0.039531373	0.257731959	99	-0.014777005	0.033886548	0.069737903	86.46000313
M9937	5A	79264462	0.039531948	0.371134021	99	-0.014777005	0.033886258	0.056335283	56.42069456
M6774	3A	58591208	0.039544001	0.12371134	99	-0.014777005	0.033880174	0.066229777	-77.98014755
M11483	5B	162710933	0.039692061	0.412371134	99	-0.014777005	0.033805594	0.074412942	98.44063954
M2615	2A	0	0.039706324	0.453608247	99	-0.014777005	0.033798426	0.068662689	-83.81448744
M4183	2B	630135956	0.039737241	0.350515464	99	-0.014777005	0.033782896	0.072828857	94.29408725
M14454	7A	38241544	0.03980195	0.309278351	99	-0.014777005	0.033750434	0.067989541	-82.17915999
M2052	1D	43145259	0.039842133	0.371134021	99	-0.014777005	0.033730304	0.061489693	-67.21746396
M4548	2B	37117645	0.039907981	0.226804124	99	-0.014777005	0.033697364	0.063373298	-71.39866477
M8400	3D	294644099	0.040054664	0.484536082	99	-0.014777005	0.033624196	0.05893566	61.74954642
M233	1A	261892580	0.040068913	0.092783505	99	-0.014777005	0.033617103	0.075545719	101.4605457
M1138	1B	220883994	0.040223597	0.257731959	99	-0.014777005	0.033540282	0.067735774	81.56684479
M4073	2B	236592763	0.040231508	0.24742268	99	-0.014777005	0.033536361	0.071614391	91.17548383
M8284	3D	7272771	0.040407729	0.371134021	99	-0.014777005	0.033449246	0.084563353	-127.1281896
M12466	6A	113174438	0.040589994	0.082474227	99	-0.014777005	0.033359569	0.07664351	104.4307132
M9750	4D	95663405	0.04066663	0.092783505	99	-0.014777005	0.033321992	0.071629076	91.21287965
M7485	3B	495521725	0.040786198	0.051546392	99	-0.014777005	0.033263514	0.080501924	115.2099522
M5479	2D	68916330	0.040812991	0.329896907	99	-0.014777005	0.033250435	0.10125221	-182.257956
M1433	1B	529627736	0.040991706	0.103092784	99	-0.014777005	0.033163432	0.071359451	90.52748776
M5044	2B	754864756	0.041093701	0.164948454	99	-0.014777005	0.03311396	0.078927901	-110.7486842
M1785	1B	646178482	0.041101955	0.268041237	99	-0.014777005	0.033109962	0.059057526	62.00517959
M2256	1D	470523363	0.041232944	0.453608247	99	-0.014777005	0.033046632	0.079367449	-111.9856362
M5687	2D	0	0.041233593	0.298969072	99	-0.014777005	0.033046318	0.067432475	-80.83802108
M850	1B	207966086	0.041297971	0.206185567	99	-0.014777005	0.033015272	0.063668254	72.06482896
M15458	7B	0	0.041318737	0.268041237	99	-0.014777005	0.033005269	0.061270805	-66.73976087
M341	1A	0	0.041380491	0.340206186	99	-0.014777005	0.032975553	0.092241141	151.2609447
M5268	2B	581469039	0.041449307	0.195876289	99	-0.014777005	0.032942495	0.067284814	-80.48437652
M6658	3A	696239384	0.041487727	0.072164948	99	-0.014777005	0.032924064	0.076916574	-105.1761651
M7380	3B	239302628	0.041491793	0.051546392	99	-0.014777005	0.032922115	0.080591415	115.4662421
M9222	4A	720689979	0.041515372	0.278350515	99	-0.014777005	0.032910813	0.058126068	60.0647073
M14190	7A	20772971	0.041542532	0.340206186	99	-0.014777005	0.032897805	0.118844364	-251.0930276
M14008	6D	89723576	0.041542532	0.340206186	99	-0.014777005	0.032897805	0.118844364	251.0930276
M15300	7B	115364020	0.041548418	0.278350515	99	-0.014777005	0.032894986	0.062932123	-70.4080383
M11415	5B	600923829	0.041600373	0.237113402	99	-0.014777005	0.03287013	0.064037633	-72.90343902
M2812	2A	166864123	0.041633488	0.041237113	99	-0.014777005	0.032854305	0.089278805	141.7014215
M6322	3A	434822187	0.041650105	0.113402062	99	-0.014777005	0.032846368	0.068673197	-83.84014137
M6793	3A	729609868	0.041709402	0.412371134	99	-0.014777005	0.032818077	0.075392673	-101.0498698
M10667	5B	67969342	0.041721503	0.402061856	99	-0.014777005	0.032812308	0.083087855	-122.7305174
M12644	6A	22624721	0.041770295	0.134020619	99	-0.014777005	0.032789068	0.068844551	-84.25906127
M961	1B	499209336	0.041798577	0.144329897	99	-0.014777005	0.03277561	0.06772166	81.53285634
M7787	3B	722479372	0.041902915	0.082474227	99	-0.014777005	0.032726045	0.0734047	-95.79110952
M13657	6B	0	0.041954841	0.402061856	99	-0.014777005	0.032701428	0.062352768	-69.11764692
M1275	1B	432597563	0.041996242	0.350515464	99	-0.014777005	0.032681823	0.079488679	112.3280017
M7989	3B	572633902	0.042042504	0.443298969	99	-0.014777005	0.032659941	0.05608039	-55.91129058
M12548	6A	517418179	0.042126267	0.463917526	99	-0.014777005	0.032620387	0.072018341	-92.20695959
M8491	3D	115087655	0.042166885	0.237113402	99	-0.014777005	0.032601237	0.064336077	73.58454856
M5259	2B	800780319	0.042222973	0.350515464	99	-0.014777005	0.032574825	0.090672102	-146.1587567
M5168	2B	779863093	0.042222973	0.350515464	99	-0.014777005	0.032574825	0.090672102	146.1587567
M23	1A	3613977	0.04223059	0.298969072	99	-0.014777005	0.032571241	0.06031478	-64.67329322
M1347	1B	498063961	0.042356484	0.360824742	99	-0.014777005	0.032512106	0.083892912	-125.1203692
M6651	3A	506259895	0.042409242	0.309278351	99	-0.014777005	0.032487381	0.064673863	-74.35926416
M8019	3B	765843802	0.042440672	0.113402062	99	-0.014777005	0.032472666	0.068945991	84.50755039
M4317	2B	386107660	0.042555258	0.443298969	99	-0.014777005	0.03241912	0.060252176	-64.53910633
M750	1B	12374383	0.042568467	0.350515464	99	-0.014777005	0.032412957	0.062640089	-69.75610275
M3954	2B	419769571	0.042782036	0.195876289	99	-0.014777005	0.0323136	0.065071969	75.27753047
M2206	1D	432636879	0.04281815	0.371134021	99	-0.014777005	0.032296851	0.069141997	84.98872329
M9325	4A	650837952	0.042824363	0.134020619	99	-0.014777005	0.032293971	0.069534164	-85.95555433
M6671	3A	703907526	0.042849489	0.443298969	99	-0.014777005	0.032282329	0.058782395	61.4287999
M652	1A	7014108	0.042875542	0.463917526	99	-0.014777005	0.032270265	0.055113592	-54.00014257
M1192	1B	143362254	0.042963467	0.288659794	99	-0.014777005	0.032229609	0.069845657	86.72739171
M9925	5A	0	0.04302415	0.360824742	99	-0.014777005	0.032201602	0.079910131	113.522293
M14949	7A	430047444	0.04309406	0.453608247	99	-0.014777005	0.032169388	0.071639111	-91.23843862
M2129	1D	244297621	0.043131081	0.484536082	99	-0.014777005	0.032152352	0.078831355	-110.4779117
M6135	3A	455701026	0.043152843	0.329896907	99	-0.014777005	0.032142345	0.058043977	-59.89516877
M6788	3A	519467461	0.043158382	0.432989691	99	-0.014777005	0.032139799	0.072799091	-94.21702589
M5489	2D	75756578	0.043191718	0.340206186	99	-0.014777005	0.032124482	0.091515192	148.8894299
M3251	2A	759751315	0.043193956	0.412371134	99	-0.014777005	0.032123454	0.065665073	76.65603247
M8795	4A	597887352	0.043268057	0.020618557	99	-0.014777005	0.032089455	0.098826719	173.6305851
M6589	3A	174036118	0.043354603	0.319587629	99	-0.014777005	0.032049824	0.065014275	75.14410645
M11229	5B	528891865	0.043435568	0.381443299	99	-0.014777005	0.032012826	0.061972834	68.27790523
M10236	5A	464081131	0.043584205	0.24742268	99	-0.014777005	0.031945095	0.061294467	66.79131868
M4439	2B	658617299	0.043586962	0.360824742	99	-0.014777005	0.031943841	0.060426258	64.91257988
M12113	6A	0	0.043618054	0.474226804	99	-0.014777005	0.031929705	0.056512304	-56.77583058
M6034	3A	35214169	0.043657266	0.432989691	99	-0.014777005	0.031911893	0.056633753	57.02012484
M2159	1D	47987649	0.043667671	0.340206186	99	-0.014777005	0.03190717	0.068737913	83.99823372
M2415	2A	13723401	0.043684532	0.484536082	99	-0.014777005	0.031899518	0.087103542	-134.8804811
M2459	2A	15960621	0.043684532	0.484536082	99	-0.014777005	0.031899518	0.087103542	-134.8804811
M13548	6B	479212545	0.043712175	0.206185567	99	-0.014777005	0.03188698	0.06230979	-69.02239984
M3915	2B	65243708	0.043741302	0.041237113	99	-0.014777005	0.031873778	0.084060407	125.6204797
M14918	7A	700180481	0.043753789	0.092783505	99	-0.014777005	0.031868121	0.077044781	-105.5270815
M485	1A	339729738	0.043795658	0.195876289	99	-0.014777005	0.031849165	0.071849235	91.77444625
M6089	3A	8191493	0.043855358	0.154639175	99	-0.014777005	0.031822171	0.065219012	75.6181243
M4506	2B	548631440	0.044024412	0.268041237	99	-0.014777005	0.031745944	0.06291039	70.35941645
M11105	5B	511603033	0.04404993	0.474226804	99	-0.014777005	0.031734465	0.066077551	-77.62209369
M1475	1B	544133182	0.044252277	0.432989691	99	-0.014777005	0.031643694	0.057243454	-58.25445461
M13686	6B	707207597	0.044344124	0.278350515	99	-0.014777005	0.031602638	0.058818512	61.5043088
M4854	2B	748703470	0.044455236	0.474226804	99	-0.014777005	0.031553093	0.061310195	66.82559921
M5648	2D	613045526	0.044510528	0.422680412	99	-0.014777005	0.031528488	0.065343997	75.90822981
M2199	1D	426977800	0.044517975	0.195876289	99	-0.014777005	0.031525176	0.078535236	-109.6494808
M11724	5B	233418958	0.044722108	0.371134021	99	-0.014777005	0.031434634	0.059827894	-63.63336683
M14205	7A	104669566	0.044742522	0.072164948	99	-0.014777005	0.031425604	0.081948851	-119.3886955
M774	1B	89404769	0.044821235	0.237113402	99	-0.014777005	0.031390827	0.072331203	-93.00982874
M2665	2A	120722528	0.044870071	0.371134021	99	-0.014777005	0.031369283	0.065590653	-76.48237846
M7970	3B	95564668	0.044878232	0.453608247	99	-0.014777005	0.031365685	0.05704538	57.85200749
M1060	1B	35143791	0.044887834	0.309278351	99	-0.014777005	0.031361452	0.063133305	70.85891907
M3869	2B	106962921	0.044946938	0.371134021	99	-0.014777005	0.031335423	0.059088738	62.07073722
M7387	3B	714302155	0.044995861	0.164948454	99	-0.014777005	0.031313906	0.062824089	70.16650867
M2246	1D	463949567	0.045025261	0.113402062	99	-0.014777005	0.031300986	0.079613263	112.6803852
M7285	3B	0	0.045151125	0.402061856	99	-0.014777005	0.031245782	0.05580729	-55.36806516
M11302	5B	93785910	0.045156023	0.12371134	99	-0.014777005	0.031243636	0.067544499	81.10683361
M15277	7B	106862437	0.045271258	0.453608247	99	-0.014777005	0.031193244	0.055931951	-55.6156995
M9940	5A	2861753	0.04527265	0.402061856	99	-0.014777005	0.031192636	0.075105581	-100.2817468
M14220	7A	10866345	0.045361185	0.010309278	99	-0.014777005	0.031154014	0.116077722	-239.5384453
M8701	4A	141909718	0.045419075	0.474226804	99	-0.014777005	0.031128804	0.064528103	74.02446286
M6268	3A	41617458	0.045518152	0.195876289	99	-0.014777005	0.031085737	0.065705084	76.74947713
M2732	2A	179992753	0.045581641	0.134020619	99	-0.014777005	0.031058193	0.083058451	122.6436665
M10989	5B	584276433	0.045638835	0.278350515	99	-0.014777005	0.031033414	0.059644768	-63.24441612
M14186	7A	10270141	0.045676101	0.12371134	99	-0.014777005	0.031017288	0.068451574	-83.29987489
M5119	2B	37969341	0.045683319	0.391752577	99	-0.014777005	0.031014166	0.061280089	-66.75998686
M3436	2B	15951770	0.04577608	0.463917526	99	-0.014777005	0.030974092	0.055349226	54.46287761
M12629	6A	570488216	0.045869543	0.237113402	99	-0.014777005	0.030933802	0.059553279	63.05054367
M6179	3A	353247178	0.045945905	0.082474227	99	-0.014777005	0.03090095	0.077917447	-107.9311741
M2321	2A	0	0.046039636	0.474226804	99	-0.014777005	0.030860705	0.088272914	-138.5263514
M7428	3B	303590858	0.046126888	0.154639175	99	-0.014777005	0.030823321	0.062956642	70.46291169
M1754	1B	636316329	0.046178917	0.041237113	99	-0.014777005	0.030801064	0.084660197	127.4195364
M4264	2B	328673302	0.046292233	0.319587629	99	-0.014777005	0.030752684	0.057687872	59.16249867
M10676	5B	153502375	0.046343194	0.422680412	99	-0.014777005	0.030730968	0.06373222	-72.20970401
M1942	1B	683150051	0.0463479	0.360824742	99	-0.014777005	0.030728964	0.062680377	-69.8458608
M9806	4D	250840711	0.046735464	0.402061856	99	-0.014777005	0.03056466	0.06350509	-71.69593707
M12375	6A	51553763	0.04674418	0.164948454	99	-0.014777005	0.030560982	0.068261242	82.83728262
M3871	2B	106962921	0.04676409	0.278350515	99	-0.014777005	0.030552583	0.064760794	74.55929578
M6463	3A	406156054	0.046787185	0.164948454	99	-0.014777005	0.030542845	0.066973465	-79.74124501
M713	1B	104669566	0.046856218	0.463917526	99	-0.014777005	0.030513767	0.066730241	79.16311229
M7336	3B	65705367	0.046883418	0.113402062	99	-0.014777005	0.030502322	0.073950237	97.22022188
M8666	4A	125344732	0.046912753	0.329896907	99	-0.014777005	0.030489988	0.096258844	164.7247106
M9145	4A	364049164	0.046921337	0.443298969	99	-0.014777005	0.03048638	0.071829699	-91.72454395
M4594	2B	690748766	0.047016313	0.484536082	99	-0.014777005	0.030446509	0.057517903	-58.81438442
M11575	5B	4511373	0.047047148	0.484536082	99	-0.014777005	0.030433583	0.069174622	-85.06894918
M3219	2A	0	0.047088612	0.103092784	99	-0.014777005	0.030416215	0.071692962	91.37565749
M13116	6B	29774522	0.047091443	0.422680412	99	-0.014777005	0.03041503	0.060450599	64.96488721
M7605	3B	562403156	0.047114921	0.381443299	99	-0.014777005	0.030405204	0.074678414	-99.14427641
M6052	3A	143037183	0.047133809	0.402061856	99	-0.014777005	0.030397303	0.081780966	118.9000257
M5788	2D	0	0.047273998	0.144329897	99	-0.014777005	0.030338767	0.063871295	-72.52519782
M8822	4A	132119668	0.047277722	0.206185567	99	-0.014777005	0.030337214	0.061383831	66.98621616
M13331	6B	152196806	0.047349673	0.350515464	99	-0.014777005	0.030307245	0.058544402	60.93239171
M6397	3A	473708936	0.047459004	0.484536082	99	-0.014777005	0.030261801	0.061784173	67.86282704
M4374	2B	446932626	0.047481432	0.494845361	99	-0.014777005	0.030252492	0.06485872	-74.78495227
M2325	2A	3539454	0.047493352	0.371134021	99	-0.014777005	0.030247547	0.065848219	77.08422953
M5942	2D	625109798	0.047502571	0.432989691	99	-0.014777005	0.030243723	0.057827691	59.44963385
M9683	4B	665957105	0.047539202	0.092783505	99	-0.014777005	0.030228537	0.070612462	-88.64212959
M9139	4A	701884398	0.047712657	0.350515464	99	-0.014777005	0.030156798	0.103022688	-188.6875411
M3997	2B	0	0.047836851	0.319587629	99	-0.014777005	0.030105605	0.079965359	-113.6792659
M2381	2A	19836679	0.047848819	0.422680412	99	-0.014777005	0.030100679	0.069224084	-85.19064565
M7560	3B	479991691	0.048242191	0.082474227	99	-0.014777005	0.029939511	0.078303474	109.0032731
M3384	2A	585501135	0.048324357	0.268041237	99	-0.014777005	0.029906024	0.05614979	-56.04975755
M7855	3B	755711290	0.048413389	0.082474227	99	-0.014777005	0.029869809	0.071807481	-91.6678094
M8624	4A	114487333	0.048452237	0.350515464	99	-0.014777005	0.029854029	0.05837808	60.58667103
M9263	4A	149057197	0.048667723	0.494845361	99	-0.014777005	0.029766747	0.065689835	-76.71385692
M6569	3A	655669363	0.048713955	0.371134021	99	-0.014777005	0.029748075	0.063837322	-72.44806491
M9470	4B	26933807	0.04882221	0.340206186	99	-0.014777005	0.029704428	0.055636202	55.02910112
M1249	1B	452770206	0.048857773	0.422680412	99	-0.014777005	0.029690112	0.067765769	81.63910127
M11503	5B	142781109	0.048909326	0.237113402	99	-0.014777005	0.029669379	0.064674079	-74.3597588
M1845	1B	0	0.049005132	0.288659794	99	-0.014777005	0.029630911	0.05681239	-57.38040368
M15402	7B	511064939	0.049154974	0.360824742	99	-0.014777005	0.029570909	0.089120852	-141.2004674
M10159	5A	446652509	0.04925792	0.453608247	99	-0.014777005	0.029529799	0.056406319	56.5630733
M6720	3A	714455841	0.049277999	0.319587629	99	-0.014777005	0.029521792	0.05902001	-61.9264284
M6807	3A	732737562	0.049420157	0.422680412	99	-0.014777005	0.029465199	0.07171873	-91.44135553
M1326	1B	16677697	0.049452056	0.422680412	99	-0.014777005	0.029452525	0.072267021	92.8448407
M7463	3B	415924572	0.049521148	0.432989691	99	-0.014777005	0.029425102	0.062617395	-69.70556704
M9760	4D	300724319	0.049545943	0.494845361	99	-0.014777005	0.029415271	0.059715354	63.39419567
M3921	2B	46298185	0.049551533	0.072164948	99	-0.014777005	0.029413055	0.075986905	-102.6490617
M14487	7A	50010206	0.049573179	0.298969072	99	-0.014777005	0.029404478	0.069886444	86.8287123
M6920	3B	373696	0.049609764	0.206185567	99	-0.014777005	0.02938999	0.066133851	-77.75442183
M1806	1B	565614324	0.04963908	0.288659794	99	-0.014777005	0.02937839	0.059588116	-63.12433084
M2440	2A	21812330	0.049639633	0.164948454	99	-0.014777005	0.029378171	0.085670689	130.4794138
M13523	6B	643641495	0.049667186	0.288659794	99	-0.014777005	0.029367274	0.070562384	-88.51644533
M1187	1B	444058473	0.049691109	0.329896907	99	-0.014777005	0.029357819	0.098010357	-170.7738667
M3820	2B	100325164	0.049822767	0.113402062	99	-0.014777005	0.029305868	0.072170557	92.59714223
M10191	5A	478372444	0.049871818	0.175257732	99	-0.014777005	0.029286551	0.060708131	65.51959415
M11537	5B	0	0.05003664	0.463917526	99	-0.014777005	0.029221791	0.067905645	-81.97647266
M7322	3B	136803388	0.050098113	0.422680412	99	-0.014777005	0.029197697	0.075187285	100.5000506
M9382	4A	732725652	0.050145498	0.381443299	99	-0.014777005	0.029179146	0.080742711	-115.9001844
M10865	5B	128642164	0.050289843	0.082474227	99	-0.014777005	0.029122751	0.07155322	91.01979283
M6591	3A	174031646	0.050294146	0.329896907	99	-0.014777005	0.029121072	0.062863218	-70.25394014
M5740	2D	607144225	0.050307332	0.257731959	99	-0.014777005	0.02911593	0.062808557	-70.13181853
M4251	2B	50457916	0.050358712	0.237113402	99	-0.014777005	0.029095906	0.067256525	80.41671429
M3380	2A	612169049	0.050413028	0.350515464	99	-0.014777005	0.029074761	0.056222657	-56.19532772
M4615	2B	91473909	0.050800906	0.051546392	99	-0.014777005	0.028924472	0.081572735	-118.2953092
M9415	4A	1535331	0.050979108	0.474226804	99	-0.014777005	0.028855839	0.066923751	-79.62290504
M11952	5D	541701594	0.051126105	0.329896907	99	-0.014777005	0.028799418	0.099458726	-175.8584551
M3243	2A	759767692	0.05115255	0.072164948	99	-0.014777005	0.028789286	0.074435509	98.5003567
M1960	1B	683413188	0.05116829	0.309278351	99	-0.014777005	0.028783259	0.069239101	-85.2276099
M12313	6A	0	0.051317897	0.494845361	99	-0.014777005	0.028726065	0.062845065	70.21337323
M4290	2B	143000173	0.051415846	0.175257732	99	-0.014777005	0.028688718	0.063759842	72.2723093
M1701	1B	453549548	0.051461391	0.298969072	99	-0.014777005	0.028671378	0.058427504	60.68930079
M11049	5B	437620864	0.051508448	0.484536082	99	-0.014777005	0.028653479	0.06315917	70.91699137
M9287	4A	51243538	0.051544341	0.422680412	99	-0.014777005	0.028639839	0.073521489	96.09616565
M1580	1B	424743133	0.051566059	0.206185567	99	-0.014777005	0.028631591	0.059399938	-62.72626906
M6727	3A	715967941	0.051604841	0.371134021	99	-0.014777005	0.028616871	0.08755228	136.2738072
M3619	2B	612309756	0.051607002	0.494845361	99	-0.014777005	0.028616051	0.065908197	77.22471988
M5261	2B	765884956	0.051638174	0.154639175	99	-0.014777005	0.028604228	0.065720827	76.7862606
M2335	2A	12351854	0.051658446	0.474226804	99	-0.014777005	0.028596544	0.083059318	-122.6462285
M332	1A	474702375	0.051767497	0.010309278	99	-0.014777005	0.028555263	0.113113202	-227.4594942
M8218	3B	826654769	0.051767497	0.010309278	99	-0.014777005	0.028555263	0.113113202	-227.4594942
M6786	3A	595019227	0.051784801	0.113402062	99	-0.014777005	0.028548721	0.067544048	81.10574855
M7639	3B	439813360	0.051816633	0.268041237	99	-0.014777005	0.028536692	0.061833979	-67.97228332
M6136	3A	455701026	0.051892763	0.381443299	99	-0.014777005	0.028507958	0.064944842	74.98368998
M4301	2B	586890691	0.051909793	0.402061856	99	-0.014777005	0.028501537	0.069146557	-84.99993512
M12345	6A	0	0.051939732	0.195876289	99	-0.014777005	0.028490253	0.063562913	71.82655931
M1434	1B	529627736	0.051976895	0.288659794	99	-0.014777005	0.028476256	0.061327686	66.86373456
M13593	6B	673827435	0.051980581	0.402061856	99	-0.014777005	0.028474869	0.07578153	102.0949373
M21	1A	2276875	0.051993053	0.391752577	99	-0.014777005	0.028470174	0.061437278	67.10291804
M9440	4B	7775094	0.052090837	0.360824742	99	-0.014777005	0.02843341	0.06549308	-76.25499654
M1568	1B	592833254	0.052118545	0.350515464	99	-0.014777005	0.028423006	0.060377419	64.80769345
M6208	3A	603025700	0.052162817	0.319587629	99	-0.014777005	0.028406394	0.057913661	-59.6265271
M6526	3A	639713075	0.052259875	0.216494845	99	-0.014777005	0.028370031	0.060667934	65.43285766
M8505	3D	609923328	0.052291514	0.216494845	99	-0.014777005	0.028358193	0.069243448	85.23831185
M2820	2A	559553702	0.052330364	0.113402062	99	-0.014777005	0.028343667	0.065758125	-76.87344095
M7986	3B	760719226	0.05238996	0.278350515	99	-0.014777005	0.028321407	0.063895505	72.58018782
M6392	3A	363608529	0.052411961	0.463917526	99	-0.014777005	0.028313196	0.064004106	-72.8271212
M11884	5D	6459997	0.05246338	0.412371134	99	-0.014777005	0.028294021	0.06073101	65.56898717
M9202	4A	714077495	0.052464648	0.391752577	99	-0.014777005	0.028293548	0.062665249	69.81215048
M6451	3A	0	0.052500221	0.010309278	99	-0.014777005	0.028280294	0.110621535	217.5488715
M6755	3A	720367772	0.052584597	0.381443299	99	-0.014777005	0.028248896	0.072239427	-92.77395312
M2830	2A	579584012	0.052601432	0.350515464	99	-0.014777005	0.028242638	0.062813496	70.14284859
M12764	6A	391337338	0.052618455	0.175257732	99	-0.014777005	0.028236312	0.062989832	-70.53722641
M473	1A	544077560	0.052626171	0.463917526	99	-0.014777005	0.028233446	0.062177152	68.72885688
M10019	5A	386840959	0.052626779	0.360824742	99	-0.014777005	0.02823322	0.056832894	57.4218274
M413	1A	97149083	0.052641993	0.391752577	99	-0.014777005	0.028227569	0.076574853	-104.2437005
M437	1A	531239793	0.052686419	0.278350515	99	-0.014777005	0.028211079	0.060557502	-65.19486265
M795	1B	30846941	0.052735676	0.402061856	99	-0.014777005	0.028192812	0.066407536	78.39930365
M9349	4A	738890239	0.052807113	0.422680412	99	-0.014777005	0.028166353	0.064247865	73.38290019
M9424	4A	1736032	0.052870019	0.103092784	99	-0.014777005	0.028143086	0.069024696	-84.70059778
M14201	7A	556299936	0.052880089	0.268041237	99	-0.014777005	0.028139364	0.06145405	67.13956009
M720	1B	6072803	0.052948752	0.020618557	99	-0.014777005	0.028114007	0.096199496	164.5216536
M6402	3A	407747638	0.05318833	0.216494845	99	-0.014777005	0.028025806	0.062021252	-68.38463538
M425	1A	507936918	0.053230962	0.237113402	99	-0.014777005	0.028010156	0.065811281	76.99777248
M8464	3D	554403644	0.053308658	0.18556701	99	-0.014777005	0.027981669	0.068747764	84.02231111
M484	1A	540712899	0.053313793	0.494845361	99	-0.014777005	0.027979788	0.069050643	84.76428873
M1542	1B	545644656	0.053341284	0.154639175	99	-0.014777005	0.02796972	0.065602547	-76.51011838
M1993	1D	8463818	0.05352904	0.360824742	99	-0.014777005	0.027901109	0.06583215	77.04661288
M685	1A	370054619	0.053616546	0.494845361	99	-0.014777005	0.027869221	0.06761998	81.28820677
M659	1A	584598710	0.0536302	0.381443299	99	-0.014777005	0.02786425	0.085588722	-130.2298542
M11414	5B	233925191	0.053673074	0.484536082	99	-0.014777005	0.027848651	0.052947544	-49.83897676
M14142	7A	0	0.053731378	0.288659794	99	-0.014777005	0.027827459	0.062519496	69.48777629
M9165	4A	710830242	0.05376198	0.257731959	99	-0.014777005	0.027816347	0.067693757	81.46568455
M164	1A	0	0.053784035	0.443298969	99	-0.014777005	0.027808342	0.05648603	56.72305005
M77	1A	14189304	0.053814289	0.402061856	99	-0.014777005	0.027797366	0.081591453	-118.3496031
M12225	6A	17652529	0.05386502	0.340206186	99	-0.014777005	0.027778978	0.068004364	-82.2149948
M3560	2B	0	0.053896967	0.474226804	99	-0.014777005	0.027767408	0.055938365	55.62845708
M11326	5B	680487180	0.053910609	0.432989691	99	-0.014777005	0.02776247	0.063264947	-71.15472963
M11151	5B	519254488	0.054054555	0.144329897	99	-0.014777005	0.027710443	0.066397186	-78.37486816
M1298	1B	65947056	0.054100054	0.164948454	99	-0.014777005	0.027694029	0.066361317	78.29021213
M6619	3A	686200851	0.054585934	0.24742268	99	-0.014777005	0.027519669	0.070008186	87.13148519
M6472	3A	556260082	0.054657224	0.443298969	99	-0.014777005	0.027494228	0.066909597	79.58922872
M12700	6A	537865949	0.054729571	0.432989691	99	-0.014777005	0.027468445	0.057820714	59.43528899
M6523	3A	481067173	0.054871861	0.463917526	99	-0.014777005	0.027417844	0.0707009	-88.86430772
M3303	2A	0	0.054907882	0.484536082	99	-0.014777005	0.027405057	0.067256043	80.41556107
M9362	4A	734002470	0.055127204	0.103092784	99	-0.014777005	0.027327394	0.086269692	132.310397
M12694	6A	611545509	0.055209979	0.494845361	99	-0.014777005	0.027298169	0.064320609	-73.54916967
M3176	2A	0	0.055268229	0.350515464	99	-0.014777005	0.027277631	0.062724547	-69.94433307
M9218	4A	726716286	0.055333145	0.484536082	99	-0.014777005	0.027254772	0.05835583	-60.54049521
M14414	7A	33732604	0.055350079	0.134020619	99	-0.014777005	0.027248813	0.077361659	106.3969114
M4169	2B	217274916	0.055539778	0.319587629	99	-0.014777005	0.027182198	0.061292459	66.78694324
M6573	3A	417553440	0.05559516	0.474226804	99	-0.014777005	0.027162796	0.055840387	-55.43375725
M11449	5B	649843951	0.055610574	0.340206186	99	-0.014777005	0.0271574	0.062156386	68.68295693
M15280	7B	113767734	0.055651318	0.154639175	99	-0.014777005	0.027143144	0.064465764	-73.88150664
M14453	7A	38241544	0.055678782	0.350515464	99	-0.014777005	0.02713354	0.059196406	-62.29714675
M4208	2B	221486615	0.055776188	0.041237113	99	-0.014777005	0.027099522	0.082179177	120.0607491
M5040	2B	767024523	0.055874993	0.237113402	99	-0.014777005	0.027065081	0.061934029	-68.19242684
M2617	2A	355706503	0.055911591	0.432989691	99	-0.014777005	0.02705234	0.062077076	68.50779404
M11959	5D	545694488	0.055919329	0.319587629	99	-0.014777005	0.027049647	0.062242038	68.8723789
M14897	7A	693025273	0.05604754	0.443298969	99	-0.014777005	0.027005092	0.060333276	-64.71296355
M12461	6A	106663978	0.056143977	0.092783505	99	-0.014777005	0.026971651	0.074830982	-99.54979333
M15230	7B	59668032	0.056199102	0.278350515	99	-0.014777005	0.026952563	0.059801094	-63.57637099
M12463	6A	171029382	0.056281746	0.391752577	99	-0.014777005	0.026923984	0.083258446	123.235001
M12465	6A	113174438	0.056281746	0.391752577	99	-0.014777005	0.026923984	0.083258446	123.235001
M1604	1B	721298541	0.056328426	0.494845361	99	-0.014777005	0.026907862	0.054951532	-53.68303762
M314	1A	562808063	0.056344076	0.381443299	99	-0.014777005	0.02690246	0.062250861	68.89190656
M688	1A	0	0.056748544	0.134020619	99	-0.014777005	0.026763409	0.066711975	79.1197803
M10834	5B	417804694	0.056946891	0.082474227	99	-0.014777005	0.026695611	0.071583375	-91.09652665
M5292	2B	795769119	0.057083053	0.309278351	99	-0.014777005	0.026649216	0.059117136	-62.13041419
M7357	3B	120598030	0.057088121	0.18556701	99	-0.014777005	0.026647491	0.060368422	-64.78838012
M11763	5B	679745997	0.057091199	0.443298969	99	-0.014777005	0.026646444	0.066081985	-77.63251042
M10305	5A	727382944	0.057101588	0.443298969	99	-0.014777005	0.026642909	0.066459799	-78.52275464
M1199	1B	0	0.057193174	0.319587629	99	-0.014777005	0.026611781	0.079257729	-111.6762255
M12100	6A	9798353	0.057203378	0.268041237	99	-0.014777005	0.026608316	0.063803645	72.37164551
M408	1A	508184592	0.057233019	0.134020619	99	-0.014777005	0.026598255	0.064512443	73.98853851
M7900	3B	752274170	0.057322534	0.371134021	99	-0.014777005	0.026567906	0.082234814	-120.2233718
M7949	3B	0	0.057322534	0.371134021	99	-0.014777005	0.026567906	0.082234814	-120.2233718
M15548	7B	25684258	0.057342125	0.422680412	99	-0.014777005	0.02656127	0.07393543	97.18129415
M6948	3B	5857902	0.057363986	0.237113402	99	-0.014777005	0.026553869	0.065567233	76.42777081
M7785	3B	671011745	0.057531402	0.360824742	99	-0.014777005	0.026497288	0.089100286	141.1353057
M845	1B	17621853	0.057699895	0.443298969	99	-0.014777005	0.026440523	0.055198653	-54.16695548
M13192	6B	77434370	0.057841578	0.278350515	99	-0.014777005	0.026392929	0.059150524	62.20061383
M10564	5B	11085155	0.057841885	0.309278351	99	-0.014777005	0.026392826	0.094516489	-158.8154088
M11576	5B	4511373	0.057985112	0.144329897	99	-0.014777005	0.026344841	0.067265575	-80.43835666
M3973	2B	159604259	0.058004139	0.443298969	99	-0.014777005	0.026338477	0.070412535	88.14089087
M9010	4A	659089834	0.058083898	0.360824742	99	-0.014777005	0.02631182	0.063431555	-71.52999462
M9156	4A	353560638	0.058117242	0.051546392	99	-0.014777005	0.026300688	0.088486225	-139.1966574
M2697	2A	36391952	0.058122396	0.278350515	99	-0.014777005	0.026298968	0.064001662	-72.8215598
M7419	3B	367482313	0.058233582	0.072164948	99	-0.014777005	0.026261901	0.071715614	-91.43340894
M3860	2B	657158433	0.058330009	0.103092784	99	-0.014777005	0.026229815	0.065603596	-76.51256523
M760	1B	13027114	0.058488908	0.329896907	99	-0.014777005	0.026177069	0.058515422	-60.87208247
M14058	6D	682135943	0.058559307	0.463917526	99	-0.014777005	0.026153749	0.058242132	60.30481668
M3296	2A	31477695	0.058808658	0.216494845	99	-0.014777005	0.026071395	0.062007856	-68.35509715
M12627	6A	566632377	0.058847412	0.350515464	99	-0.014777005	0.026058629	0.059682693	63.3248679
M4227	2B	180559587	0.058878285	0.422680412	99	-0.014777005	0.026048466	0.054215269	-52.25413966
M11298	5B	180678878	0.058885288	0.453608247	99	-0.014777005	0.026046162	0.067006343	79.81955442
M822	1B	35453808	0.058965868	0.278350515	99	-0.014777005	0.026019666	0.065857934	77.10697752
M7693	3B	684619731	0.058970606	0.288659794	99	-0.014777005	0.02601811	0.067386389	-80.72756372
M3999	2B	213709998	0.059194262	0.298969072	99	-0.014777005	0.02594478	0.055024568	53.82583184
M1788	1B	608599570	0.059254638	0.309278351	99	-0.014777005	0.025925037	0.083264907	123.2541282
M3128	2A	751913366	0.059285358	0.494845361	99	-0.014777005	0.025914999	0.062267441	68.92860756
M2833	2A	177899477	0.059289968	0.12371134	99	-0.014777005	0.025913493	0.071617744	-91.18402277
M2016	1D	13713162	0.059356805	0.391752577	99	-0.014777005	0.025891676	0.059435079	-62.80050925
M4121	2B	305658684	0.059386939	0.463917526	99	-0.014777005	0.025881848	0.063298739	-71.23076144
M8674	4A	232125986	0.059435209	0.340206186	99	-0.014777005	0.025866117	0.058385981	-60.60307241
M10588	5B	576692587	0.059508288	0.06185567	99	-0.014777005	0.025842326	0.079782436	113.1597696
M3996	2B	0	0.059508417	0.443298969	99	-0.014777005	0.025842284	0.060896295	-65.92637835
M974	1B	0	0.059517637	0.278350515	99	-0.014777005	0.025839285	0.062476328	-69.39184936
M12556	6A	39131835	0.059517888	0.422680412	99	-0.014777005	0.025839203	0.066081772	77.63201022
M15225	7B	474475078	0.059523837	0.350515464	99	-0.014777005	0.025837269	0.061077257	-66.318779
M5265	2B	31477695	0.059579274	0.175257732	99	-0.014777005	0.025819247	0.062970649	70.49426941
M6637	3A	695160174	0.059599443	0.164948454	99	-0.014777005	0.025812696	0.065785124	-76.9365776
M7097	3B	22443954	0.059601749	0.298969072	99	-0.014777005	0.025811947	0.079375221	112.0075677
M70	1A	10423224	0.059671932	0.12371134	99	-0.014777005	0.025789167	0.065230831	75.64553469
M8551	4A	47132358	0.059678193	0.474226804	99	-0.014777005	0.025787137	0.069043256	84.74615512
M6784	3A	726107371	0.059771099	0.340206186	99	-0.014777005	0.02575703	0.086939393	-134.3725881
M83	1A	14718514	0.059926913	0.391752577	99	-0.014777005	0.025706652	0.059864156	63.71052801
M6756	3A	720367772	0.059972005	0.360824742	99	-0.014777005	0.025692099	0.065667923	-76.66268567
M11149	5B	421995258	0.060007589	0.18556701	99	-0.014777005	0.025680623	0.063692962	72.12077185
M12443	6A	67125239	0.060054211	0.402061856	99	-0.014777005	0.025665598	0.082197907	-120.1154827
M12451	6A	98982876	0.060054211	0.402061856	99	-0.014777005	0.025665598	0.082197907	-120.1154827
M12462	6A	106663978	0.060054211	0.402061856	99	-0.014777005	0.025665598	0.082197907	-120.1154827
M12495	6A	317631893	0.060054211	0.402061856	99	-0.014777005	0.025665598	0.082197907	-120.1154827
M12460	6A	98753506	0.060054211	0.402061856	99	-0.014777005	0.025665598	0.082197907	120.1154827
M3329	2A	765631505	0.06014208	0.432989691	99	-0.014777005	0.025637315	0.056224329	56.19867018
M4633	2B	194674315	0.060246683	0.453608247	99	-0.014777005	0.025603704	0.061300148	-66.80369927
M11515	5B	562373770	0.060288867	0.494845361	99	-0.014777005	0.025590168	0.066997591	-79.79870593
M7172	3B	41138847	0.060492183	0.237113402	99	-0.014777005	0.025525069	0.063369238	71.38951785
M6171	3A	234640908	0.060564207	0.371134021	99	-0.014777005	0.025502064	0.05340194	50.6980836
M6457	3A	570114845	0.060565427	0.257731959	99	-0.014777005	0.025501675	0.056315744	56.38156542
M1203	1B	116830677	0.060590331	0.24742268	99	-0.014777005	0.025493727	0.064602543	74.19535145
M6185	3A	320920365	0.060647214	0.329896907	99	-0.014777005	0.025475588	0.094728213	159.5277219
M2138	1D	15543975	0.060721649	0.309278351	99	-0.014777005	0.02545188	0.057392803	-58.55882448
M4783	2B	733180507	0.060816595	0.113402062	99	-0.014777005	0.025421684	0.065232797	-75.65009336
M9538	4B	529563926	0.060992633	0.443298969	99	-0.014777005	0.025365834	0.068077714	82.39244725
M8842	4A	441981603	0.061102098	0.412371134	99	-0.014777005	0.025331193	0.059279713	-62.47261024
M2431	2A	8804062	0.061150625	0.154639175	99	-0.014777005	0.025315857	0.085314576	-129.3969211
M2674	2A	0	0.061150625	0.154639175	99	-0.014777005	0.025315857	0.085314576	129.3969211
M10979	5B	487906623	0.061388546	0.278350515	99	-0.014777005	0.02524086	0.06451292	-73.98963361
M2494	2A	10263416	0.061435947	0.288659794	99	-0.014777005	0.025225957	0.063637542	71.99532111
M7382	3B	130186332	0.061456906	0.237113402	99	-0.014777005	0.02521937	0.058889644	61.65315883
M3825	2B	587422326	0.06160182	0.237113402	99	-0.014777005	0.0251739	0.059279033	-62.47117877
M2771	2A	432372670	0.061626234	0.463917526	99	-0.014777005	0.025166251	0.076366608	103.6774912
M5967	2D	644662016	0.061814438	0.226804124	99	-0.014777005	0.025107395	0.068006586	82.22036974
M11630	5B	25458537	0.061829412	0.422680412	99	-0.014777005	0.025102721	0.062574072	69.60914736
M9213	4A	14301407	0.061856389	0.288659794	99	-0.014777005	0.025094302	0.061948045	-68.22329362
M3476	2B	17493420	0.061952735	0.484536082	99	-0.014777005	0.02506427	0.063595009	-71.8991132
M13953	6D	95594839	0.061956038	0.010309278	99	-0.014777005	0.025063241	0.115401399	236.7552503
M2952	2A	691845663	0.061956038	0.010309278	99	-0.014777005	0.025063241	0.115401399	236.7552503
M829	1B	441543004	0.062035354	0.412371134	99	-0.014777005	0.025038556	0.069977618	87.05541327
M11381	5B	537784811	0.062100444	0.278350515	99	-0.014777005	0.025018324	0.061509493	-67.26076
M4304	2B	216469247	0.0621064	0.360824742	99	-0.014777005	0.025016474	0.054213752	52.25121591
M11978	5D	547236722	0.062140305	0.041237113	99	-0.014777005	0.025005946	0.080169596	114.2606952
M6057	3A	8862385	0.062219417	0.195876289	99	-0.014777005	0.024981404	0.059288166	-62.49042896
M3747	2B	82299774	0.062368325	0.06185567	99	-0.014777005	0.024935301	0.074603833	-98.94634485
M7344	3B	70108166	0.062389345	0.082474227	99	-0.014777005	0.024928803	0.074237715	-97.97756984
M6688	3A	420562185	0.062394486	0.350515464	99	-0.014777005	0.024927214	0.060447328	64.95785793
M9957	5A	74419583	0.06240086	0.371134021	99	-0.014777005	0.024925244	0.071332806	-90.45989614
M2363	2A	125507642	0.062446256	0.309278351	99	-0.014777005	0.024911221	0.062185184	68.74661543
M1412	1B	0	0.062481621	0.340206186	99	-0.014777005	0.024900304	0.060579596	-65.24244259
M3270	2A	766416023	0.062514221	0.402061856	99	-0.014777005	0.024890246	0.055494984	-54.75010263
M14553	7A	66446609	0.0625422	0.329896907	99	-0.014777005	0.024881619	0.068354677	83.06421017
M7871	3B	559218778	0.062619273	0.020618557	99	-0.014777005	0.024857875	0.0945963	159.0837333
M1946	1B	680984665	0.062624432	0.463917526	99	-0.014777005	0.024856287	0.056092203	55.93484858
M2524	2A	35952052	0.062717368	0.391752577	99	-0.014777005	0.024827701	0.06502274	75.16367449
M14595	7A	94404127	0.062766084	0.257731959	99	-0.014777005	0.024812735	0.058741072	61.34246368
M9678	4B	16804898	0.062802708	0.309278351	99	-0.014777005	0.024801492	0.056843336	57.44293043
M8742	4A	537445906	0.062928037	0.268041237	99	-0.014777005	0.024763072	0.05678724	57.32961111
M416	1A	515899450	0.062980543	0.072164948	99	-0.014777005	0.024747	0.070891805	89.34485401
M9073	4A	641838580	0.062998359	0.113402062	99	-0.014777005	0.02474155	0.067573078	81.17548163
M2156	1D	431046013	0.063009619	0.206185567	99	-0.014777005	0.024738107	0.070507628	88.37912101
M3135	2A	756929010	0.06304137	0.360824742	99	-0.014777005	0.0247284	0.077673452	107.2562685
M1578	1B	420600926	0.063118286	0.175257732	99	-0.014777005	0.024704908	0.061538362	67.32391094
M5924	2D	695112271	0.063163946	0.298969072	99	-0.014777005	0.024690977	0.076096726	102.9459866
M3713	2B	312640552	0.063165987	0.309278351	99	-0.014777005	0.024690354	0.055593453	-54.94456951
M6382	3A	56776160	0.063254411	0.494845361	99	-0.014777005	0.024663408	0.055547463	54.85370053
M6390	3A	521790629	0.063261192	0.484536082	99	-0.014777005	0.024661343	0.057857602	-59.51114778
M8558	4A	63814925	0.063314828	0.195876289	99	-0.014777005	0.02464502	0.064868371	-74.80720953
M1577	1B	420600926	0.063718004	0.257731959	99	-0.014777005	0.024522796	0.059588848	63.12588115
M12830	6A	0	0.063909245	0.402061856	99	-0.014777005	0.024465114	0.055860987	-55.47466401
M11407	5B	429304228	0.06393448	0.237113402	99	-0.014777005	0.024457517	0.060067461	64.1439986
M2549	2A	0	0.063934891	0.309278351	99	-0.014777005	0.024457393	0.057429467	58.6336661
M7616	3B	581268420	0.064055437	0.164948454	99	-0.014777005	0.024421146	0.069859487	86.76173982
M14404	7A	333433088	0.064089207	0.164948454	99	-0.014777005	0.024411005	0.073264264	95.42493065
M9100	4A	220162554	0.064357096	0.432989691	99	-0.014777005	0.024330764	0.070162803	-87.51678142
M15247	7B	70880591	0.064395534	0.432989691	99	-0.014777005	0.02431928	0.067387955	80.73131471
M5517	2D	212311734	0.064439606	0.144329897	99	-0.014777005	0.024306122	0.062636936	-69.74907921
M725	1B	3164636	0.064445169	0.195876289	99	-0.014777005	0.024304462	0.064605305	-74.20169747
M11166	5B	519005204	0.064677098	0.103092784	99	-0.014777005	0.024235386	0.07206958	92.33821136
M10276	5A	0	0.064732853	0.051546392	99	-0.014777005	0.024218821	0.080287103	114.5958915
M12221	6A	13902305	0.064759718	0.350515464	99	-0.014777005	0.024210844	0.057928604	59.65730041
M8596	4A	392658355	0.064808143	0.226804124	99	-0.014777005	0.024196475	0.062883307	70.29884896
M11579	5B	581759209	0.064865908	0.319587629	99	-0.014777005	0.024179351	0.060329953	64.70583452
M7170	3B	37403983	0.065100203	0.463917526	99	-0.014777005	0.024110062	0.059025412	61.93776425
M12017	5D	553072577	0.065118194	0.216494845	99	-0.014777005	0.024104752	0.057994067	59.79220908
M13272	6B	106985833	0.065181254	0.020618557	99	-0.014777005	0.024086155	0.096901263	166.9307505
M7337	3B	0	0.06526151	0.422680412	99	-0.014777005	0.024062515	0.059348549	62.6177823
M10779	5B	410537310	0.065322426	0.432989691	99	-0.014777005	0.024044593	0.062180163	68.73551518
M14512	7A	56245466	0.065344066	0.412371134	99	-0.014777005	0.02403823	0.076630097	-104.3941653
M2728	2A	493808292	0.06543544	0.329896907	99	-0.014777005	0.02401139	0.062096445	-68.55055096
M11144	5B	415769289	0.065534133	0.360824742	99	-0.014777005	0.023982446	0.077828885	107.6859627
M9114	4A	701293979	0.065535389	0.12371134	99	-0.014777005	0.023982078	0.066811849	79.35685644
M15181	7B	27599460	0.065564709	0.020618557	99	-0.014777005	0.023973489	0.096410521	165.244241
M9359	4A	4344591	0.065670145	0.206185567	99	-0.014777005	0.023942635	0.061533017	-67.31221608
M11998	5D	553338175	0.065733916	0.360824742	99	-0.014777005	0.023924	0.054185504	-52.19677944
M3273	2A	769032955	0.065764883	0.391752577	99	-0.014777005	0.023914958	0.057200425	-58.16690869
M2821	2A	477627488	0.065839748	0.072164948	99	-0.014777005	0.023893117	0.073035986	-94.83120565
M5987	2D	786225684	0.065937133	0.195876289	99	-0.014777005	0.023864746	0.063441876	71.55327378
M11146	5B	502377352	0.065960999	0.020618557	99	-0.014777005	0.023857801	0.096544561	165.7040406
M15398	7B	522729143	0.065980788	0.432989691	99	-0.014777005	0.023852043	0.06299294	-70.54418739
M6437	3A	526866497	0.065995738	0.257731959	99	-0.014777005	0.023847695	0.060154026	64.32900971
M2600	2A	81014769	0.066010839	0.298969072	99	-0.014777005	0.023843304	0.064843773	-74.75048675
M8353	3D	42679365	0.066193175	0.020618557	99	-0.014777005	0.023790372	0.095056573	-160.635591
M2268	1D	95949764	0.066213092	0.268041237	99	-0.014777005	0.0237846	0.061820011	-67.94157687
M11124	5B	698209017	0.06628914	0.402061856	99	-0.014777005	0.023762577	0.062243107	68.87474486
M3577	2B	33729208	0.066318077	0.134020619	99	-0.014777005	0.023754204	0.064454826	-73.85643827
M3502	2B	0	0.066388123	0.474226804	99	-0.014777005	0.023733953	0.05469125	-53.17569544
M2552	2A	158288081	0.066398294	0.381443299	99	-0.014777005	0.023731015	0.064341766	-73.59756257
M11039	5B	630923004	0.066524155	0.412371134	99	-0.014777005	0.023694692	0.069796932	86.60643069
M7427	3B	303590858	0.06653051	0.18556701	99	-0.014777005	0.02369286	0.058849858	-61.56988094
M3049	2A	498229618	0.066553231	0.020618557	99	-0.014777005	0.023686311	0.093137157	154.213866
M5437	2D	607996993	0.066618747	0.453608247	99	-0.014777005	0.023667442	0.060791188	-65.69899648
M2572	2A	71172019	0.066691958	0.113402062	99	-0.014777005	0.02364638	0.064716404	-74.45711844
M15028	7A	711324238	0.066753933	0.412371134	99	-0.014777005	0.023628571	0.056032247	55.81533702
M6539	3A	662527377	0.066759431	0.484536082	99	-0.014777005	0.023626992	0.067203654	-80.29033133
M9315	4A	336207656	0.066899126	0.484536082	99	-0.014777005	0.023586918	0.068231315	82.76466442
M8619	4A	107154792	0.066936812	0.412371134	99	-0.014777005	0.023576122	0.063043037	70.65643628
M8614	4A	475428443	0.066952	0.391752577	99	-0.014777005	0.023571773	0.063597881	71.90560922
M3734	2B	462272407	0.066958341	0.360824742	99	-0.014777005	0.023569958	0.056012291	-55.77558669
M11032	5B	487460716	0.067190171	0.309278351	99	-0.014777005	0.023503717	0.060256476	-64.5483175
M4701	2B	425264799	0.067253324	0.391752577	99	-0.014777005	0.023485715	0.066827868	79.39491338
M8912	4A	32202337	0.067274114	0.051546392	99	-0.014777005	0.023479793	0.074506327	98.6878716
M13737	6B	611901303	0.067332833	0.010309278	99	-0.014777005	0.023463077	0.113176344	-227.713509
M2194	1D	421863618	0.067332833	0.010309278	99	-0.014777005	0.023463077	0.113176344	-227.713509
M7814	3B	549104307	0.067332833	0.010309278	99	-0.014777005	0.023463077	0.113176344	-227.713509
M7826	3B	464837996	0.067332833	0.010309278	99	-0.014777005	0.023463077	0.113176344	-227.713509
M7828	3B	552530358	0.067332833	0.010309278	99	-0.014777005	0.023463077	0.113176344	-227.713509
M7838	3B	441570426	0.067332833	0.010309278	99	-0.014777005	0.023463077	0.113176344	-227.713509
M7853	3B	302427239	0.067332833	0.010309278	99	-0.014777005	0.023463077	0.113176344	227.713509
M10547	5B	6974088	0.067438946	0.402061856	99	-0.014777005	0.02343291	0.069642653	-86.22398511
M14693	7A	255900956	0.067601102	0.484536082	99	-0.014777005	0.02338691	0.059080971	62.05442078
M11567	5B	576916243	0.067648368	0.463917526	99	-0.014777005	0.023373524	0.065283147	75.76692026
M3767	2B	94165247	0.067674899	0.329896907	99	-0.014777005	0.023366014	0.080693845	-115.7599412
M6633	3A	292579611	0.067686563	0.24742268	99	-0.014777005	0.023362714	0.061297956	66.79892195
M14586	7A	85601206	0.067752329	0.381443299	99	-0.014777005	0.023344117	0.060094636	64.20204963
M6330	3A	457796953	0.067880026	0.422680412	99	-0.014777005	0.023308064	0.078989588	110.921866
M13543	6B	355769259	0.068002577	0.092783505	99	-0.014777005	0.023273533	0.069901086	-86.86509952
M4710	2B	711866548	0.068074682	0.494845361	99	-0.014777005	0.023253248	0.065024999	75.16889691
M4686	2B	704429363	0.06808018	0.494845361	99	-0.014777005	0.023251702	0.061266507	66.73039788
M6891	3B	7791132	0.068084231	0.412371134	99	-0.014777005	0.023250563	0.060325585	-64.69646645
M2039	1D	711983266	0.068129713	0.164948454	99	-0.014777005	0.023237782	0.0885064	-139.2601379
M2086	1D	608803869	0.068129713	0.164948454	99	-0.014777005	0.023237782	0.0885064	-139.2601379
M2322	2A	0	0.068129713	0.164948454	99	-0.014777005	0.023237782	0.0885064	-139.2601379
M2347	2A	10847132	0.068129713	0.164948454	99	-0.014777005	0.023237782	0.0885064	-139.2601379
M2438	2A	21005732	0.068129713	0.164948454	99	-0.014777005	0.023237782	0.0885064	-139.2601379
M2686	2A	283070572	0.068129713	0.164948454	99	-0.014777005	0.023237782	0.0885064	-139.2601379
M2724	2A	502634131	0.068129713	0.164948454	99	-0.014777005	0.023237782	0.0885064	-139.2601379
M2112	1D	358397196	0.068129713	0.164948454	99	-0.014777005	0.023237782	0.0885064	139.2601379
M2253	1D	480011666	0.068129713	0.164948454	99	-0.014777005	0.023237782	0.0885064	139.2601379
M2328	2A	4990266	0.068129713	0.164948454	99	-0.014777005	0.023237782	0.0885064	139.2601379
M2352	2A	14900108	0.068129713	0.164948454	99	-0.014777005	0.023237782	0.0885064	139.2601379
M2414	2A	21041554	0.068129713	0.164948454	99	-0.014777005	0.023237782	0.0885064	139.2601379
M2442	2A	16617232	0.068129713	0.164948454	99	-0.014777005	0.023237782	0.0885064	139.2601379
M2468	2A	21465723	0.068129713	0.164948454	99	-0.014777005	0.023237782	0.0885064	139.2601379
M2486	2A	20188063	0.068129713	0.164948454	99	-0.014777005	0.023237782	0.0885064	139.2601379
M2672	2A	0	0.068129713	0.164948454	99	-0.014777005	0.023237782	0.0885064	139.2601379
M2680	2A	14418775	0.068129713	0.164948454	99	-0.014777005	0.023237782	0.0885064	139.2601379
M2715	2A	349793065	0.068129713	0.164948454	99	-0.014777005	0.023237782	0.0885064	139.2601379
M2766	2A	495220330	0.068129713	0.164948454	99	-0.014777005	0.023237782	0.0885064	139.2601379
M12664	6A	543972128	0.068282296	0.103092784	99	-0.014777005	0.02319497	0.068509491	-83.44089603
M13105	6B	42378167	0.06830641	0.288659794	99	-0.014777005	0.023188214	0.057733643	-59.25641834
M4435	2B	620850327	0.068316019	0.24742268	99	-0.014777005	0.023185522	0.057434722	-58.64439578
M13406	6B	477699330	0.06832854	0.381443299	99	-0.014777005	0.023182016	0.058825978	61.5199225
M6312	3A	69361313	0.06843985	0.474226804	99	-0.014777005	0.023150873	0.060259401	-64.55458432
M5278	2B	0	0.068447855	0.113402062	99	-0.014777005	0.023148635	0.069011209	84.66750074
M5662	2D	738255354	0.06848135	0.412371134	99	-0.014777005	0.023139276	0.063578984	71.86288317
M1540	1B	571445284	0.068564846	0.195876289	99	-0.014777005	0.023115967	0.063121537	-70.83250608
M9667	4B	30330500	0.068817091	0.402061856	99	-0.014777005	0.023045735	0.066397211	-78.37492769
M698	1A	491804002	0.068923862	0.298969072	99	-0.014777005	0.023016092	0.060145125	64.30997367
M1437	1B	790223846	0.069089892	0.206185567	99	-0.014777005	0.022970095	0.059340699	62.60121905
M13574	6B	667201097	0.069098857	0.432989691	99	-0.014777005	0.022967615	0.05570159	-55.15852615
M9696	4B	562337110	0.069190917	0.432989691	99	-0.014777005	0.022942167	0.061738812	-67.76321547
M6969	3B	34156784	0.069259351	0.412371134	99	-0.014777005	0.022923273	0.053928118	-51.70207882
M4520	2B	680237252	0.069344654	0.432989691	99	-0.014777005	0.02289975	0.065203567	75.58231436
M14271	7A	9517687	0.069399027	0.463917526	99	-0.014777005	0.022884773	0.062476307	-69.39180437
M1637	1B	601383349	0.069437599	0.484536082	99	-0.014777005	0.022874156	0.057939427	59.67959456
M9203	4A	716265884	0.069461609	0.298969072	99	-0.014777005	0.022867551	0.063124294	70.8386932
M2340	2A	20343461	0.069480239	0.164948454	99	-0.014777005	0.022862427	0.077307177	-106.2471042
M8678	4A	374355718	0.069532364	0.484536082	99	-0.014777005	0.022848099	0.061942656	-68.21142568
M11463	5B	243695786	0.069532463	0.494845361	99	-0.014777005	0.022848072	0.060657931	-65.41128094
M6039	3A	0	0.069557833	0.041237113	99	-0.014777005	0.022841103	0.081632541	118.4688304
M1938	1B	398676269	0.06956894	0.474226804	99	-0.014777005	0.022838052	0.056004345	-55.75976304
M4509	2B	668683546	0.069586996	0.463917526	99	-0.014777005	0.022833095	0.068455119	-83.30850436
M6764	3A	780291542	0.069729494	0.412371134	99	-0.014777005	0.022794019	0.070262447	-87.76553793
M1662	1B	606635803	0.069752221	0.12371134	99	-0.014777005	0.022787795	0.065802602	-76.97746505
M11470	5B	159873308	0.069802537	0.484536082	99	-0.014777005	0.022774023	0.06235355	-69.11938236
M2621	2A	95275091	0.069808703	0.278350515	99	-0.014777005	0.022772336	0.062693714	-69.87558721
M432	1A	585075445	0.069935864	0.350515464	99	-0.014777005	0.022737583	0.054888261	53.55948882
M3241	2A	648639392	0.070056738	0.340206186	99	-0.014777005	0.022704611	0.056674656	-57.10251814
M11901	5D	175947785	0.070058378	0.134020619	99	-0.014777005	0.022704164	0.069264549	85.29027015
M13389	6B	263724280	0.070108833	0.288659794	99	-0.014777005	0.02269042	0.059713529	-63.39032134
M1716	1B	630932576	0.070124125	0.020618557	99	-0.014777005	0.022686256	0.096008897	-163.8703686
M13963	6D	26988617	0.070243756	0.164948454	99	-0.014777005	0.022653719	0.067547066	81.11299695
M7421	3B	434047988	0.070297236	0.402061856	99	-0.014777005	0.022639192	0.072199668	-92.67185867
M1202	1B	489902408	0.070302099	0.164948454	99	-0.014777005	0.022637872	0.062959856	70.47010517
M58	1A	362741398	0.070386503	0.144329897	99	-0.014777005	0.022614973	0.061784354	-67.86322562
M13494	6B	205902023	0.07041288	0.082474227	99	-0.014777005	0.022607822	0.069974899	87.04864858
M12612	6A	558795265	0.070431549	0.113402062	99	-0.014777005	0.022602764	0.06571222	-76.76614821
M11599	5B	683229885	0.07047612	0.216494845	99	-0.014777005	0.022590692	0.057061121	-57.88393827
M9527	4B	410992756	0.070479804	0.134020619	99	-0.014777005	0.022589694	0.063839473	72.4529475
M15334	7B	254067422	0.070658977	0.154639175	99	-0.014777005	0.022541252	0.062276915	-68.94958475
M833	1B	21523277	0.070734247	0.329896907	99	-0.014777005	0.022520942	0.078044185	108.2825741
M3752	2B	408490253	0.070756982	0.18556701	99	-0.014777005	0.022514812	0.063532517	71.75787841
M6881	3A	609286936	0.070780412	0.226804124	99	-0.014777005	0.022508496	0.057832535	-59.45959307
M12455	6A	115329227	0.070792391	0.381443299	99	-0.014777005	0.022505268	0.084163617	-125.9291447
M14255	7A	0	0.070827849	0.340206186	99	-0.014777005	0.022495717	0.110771435	-218.1388597
M6667	3A	704351428	0.070930785	0.474226804	99	-0.014777005	0.022468019	0.052789778	-49.54241126
M5909	2D	615707186	0.071013462	0.391752577	99	-0.014777005	0.022445805	0.08103121	-116.7299016
M14237	7A	64554044	0.071021486	0.463917526	99	-0.014777005	0.02244365	0.064434189	-73.80914939
M5745	2D	601206508	0.071469939	0.381443299	99	-0.014777005	0.022323657	0.058329813	60.48652529
M275	1A	397669794	0.071624224	0.371134021	99	-0.014777005	0.022282565	0.072537954	93.54230772
M779	1B	231095837	0.071644129	0.432989691	99	-0.014777005	0.02227727	0.069014413	-84.67536263
M5857	2D	603508254	0.07190803	0.319587629	99	-0.014777005	0.022207227	0.057322447	58.41534158
M11	1A	0	0.072073598	0.474226804	99	-0.014777005	0.022163426	0.060955488	66.0546048
M6409	3A	397200871	0.072078112	0.092783505	99	-0.014777005	0.022162233	0.078929056	-110.7519272
M9198	4A	713898148	0.072176672	0.278350515	99	-0.014777005	0.022136213	0.061366705	-66.94884453
M9735	4D	681466316	0.072200756	0.432989691	99	-0.014777005	0.02212986	0.068334046	-83.01407782
M373	1A	500074495	0.072279117	0.309278351	99	-0.014777005	0.022109208	0.065425232	76.09708353
M4613	2B	91473909	0.072299409	0.164948454	99	-0.014777005	0.022103863	0.060869669	-65.86873964
M11908	5D	254497566	0.072387349	0.175257732	99	-0.014777005	0.022080722	0.083347604	-123.4990765
M14300	7A	17197201	0.072419816	0.412371134	99	-0.014777005	0.022072186	0.064797987	74.64496298
M3613	2B	26497203	0.072448392	0.432989691	99	-0.014777005	0.022064677	0.061221938	-66.6333464
M12353	6A	50483728	0.07250284	0.494845361	99	-0.014777005	0.022050378	0.061926351	-68.17551972
M8504	3D	603669558	0.07254406	0.237113402	99	-0.014777005	0.02203956	0.060527505	65.13029062
M5811	2D	588737228	0.072585458	0.412371134	99	-0.014777005	0.022028703	0.062147551	68.66343278
M2708	2A	403212705	0.072679898	0.164948454	99	-0.014777005	0.022003959	0.07881745	110.4389419
M7591	3B	379343215	0.072758197	0.381443299	99	-0.014777005	0.021983471	0.076728503	-104.6624561
M2581	2A	57837047	0.072761574	0.484536082	99	-0.014777005	0.021982588	0.065487712	-76.24249591
M11508	5B	154278470	0.072775899	0.432989691	99	-0.014777005	0.021978842	0.068104842	-82.4581248
M15249	7B	64780940	0.072931778	0.268041237	99	-0.014777005	0.021938137	0.059208572	-62.32275638
M12942	6A	75182853	0.073055055	0.463917526	99	-0.014777005	0.021906012	0.066050355	-77.55821055
M4057	2B	344404616	0.073067395	0.309278351	99	-0.014777005	0.021902799	0.053196547	-50.30884614
M9319	4A	336207656	0.073211103	0.443298969	99	-0.014777005	0.021865432	0.067789014	81.69511783
M6335	3A	369293414	0.073254857	0.082474227	99	-0.014777005	0.021854071	0.067934824	-82.04693955
M6342	3A	108025232	0.073318025	0.494845361	99	-0.014777005	0.021837682	0.058927931	61.73335191
M11113	5B	531194944	0.073391386	0.381443299	99	-0.014777005	0.021818667	0.07802188	108.2206886
M1654	1B	584320517	0.073410655	0.030927835	99	-0.014777005	0.021813676	0.091165202	147.7527843
M4312	2B	456976627	0.073532652	0.237113402	99	-0.014777005	0.021782111	0.057383185	-58.53919759
M6529	3A	639700048	0.073627768	0.092783505	99	-0.014777005	0.02175754	0.067902618	81.9691658
M160	1A	15435331	0.073813393	0.340206186	99	-0.014777005	0.021709688	0.060619498	-65.3284185
M790	1B	634798060	0.073904432	0.371134021	99	-0.014777005	0.021686267	0.078051208	-108.3020643
M5291	2B	795769119	0.073958537	0.154639175	99	-0.014777005	0.021672363	0.06300416	70.56931785
M870	1B	9652067	0.074019875	0.340206186	99	-0.014777005	0.021656614	0.061414523	67.053221
M12772	6A	714489935	0.074150625	0.494845361	99	-0.014777005	0.021623089	0.060324865	64.69492084
M1800	1B	746101578	0.074190488	0.360824742	99	-0.014777005	0.021612881	0.053770715	51.40070792
M13587	6B	676372364	0.074315579	0.463917526	99	-0.014777005	0.021580886	0.05479555	53.37870686
M6851	3A	726993854	0.074324521	0.474226804	99	-0.014777005	0.021578602	0.051037851	46.30866121
M3735	2B	73002301	0.074380987	0.422680412	99	-0.014777005	0.021564181	0.056786607	-57.32833277
M7497	3B	381348475	0.074405699	0.072164948	99	-0.014777005	0.021557873	0.073926309	-97.15731767
M7592	3B	379343215	0.074514465	0.06185567	99	-0.014777005	0.021530138	0.073057027	-94.88585297
M7573	3B	364670841	0.074625301	0.391752577	99	-0.014777005	0.021501921	0.073602428	-96.30786613
M13676	6B	0	0.074714931	0.319587629	99	-0.014777005	0.021479136	0.055866553	-55.48572034
M12488	6A	358607782	0.074808254	0.072164948	99	-0.014777005	0.021455445	0.073915502	97.1289142
M4141	2B	108313448	0.074812871	0.350515464	99	-0.014777005	0.021454273	0.08120785	117.2393759
M13806	6B	0	0.074828122	0.082474227	99	-0.014777005	0.021450405	0.068558121	83.55939514
M15223	7B	60498476	0.074844728	0.391752577	99	-0.014777005	0.021446194	0.055999607	55.75032823
M13680	6B	705935137	0.07493093	0.463917526	99	-0.014777005	0.02142435	0.054030522	51.8986187
M15103	7A	731424299	0.075049556	0.443298969	99	-0.014777005	0.021394335	0.071285773	-90.34064845
M1989	1D	2053505	0.075067331	0.453608247	99	-0.014777005	0.021389842	0.055295094	54.35639894
M6527	3A	639700048	0.075079498	0.144329897	99	-0.014777005	0.021386767	0.06760885	-81.26145117
M3675	2B	6409896	0.075186112	0.484536082	99	-0.014777005	0.021359846	0.063137598	-70.86855622
M4557	2B	51589506	0.075258697	0.319587629	99	-0.014777005	0.021341543	0.057673765	59.13356656
M11517	5B	715223883	0.075272414	0.288659794	99	-0.014777005	0.021338086	0.062652543	69.78384367
M6722	3A	714455841	0.075329015	0.422680412	99	-0.014777005	0.021323829	0.057632232	-59.04843041
M10304	5A	727382944	0.075347648	0.474226804	99	-0.014777005	0.021319138	0.068559134	-83.56186477
M433	1A	585075445	0.07542559	0.432989691	99	-0.014777005	0.02129953	0.06306031	-70.69515934
M11591	5B	680236004	0.07559523	0.360824742	99	-0.014777005	0.02125693	0.055850575	55.45398676
M1828	1B	659387123	0.075704375	0.402061856	99	-0.014777005	0.021229576	0.052071999	48.20432064
M2350	2A	18058853	0.075883237	0.412371134	99	-0.014777005	0.021184844	0.065834512	77.05214231
M2032	1D	20698660	0.075960289	0.360824742	99	-0.014777005	0.021165609	0.06366736	72.06280361
M6319	3A	434822187	0.075987394	0.216494845	99	-0.014777005	0.021158848	0.059858036	-63.69750126
M8058	3B	0	0.076054813	0.051546392	99	-0.014777005	0.021142042	0.076764998	104.7620418
M115	1A	13940751	0.076094727	0.257731959	99	-0.014777005	0.0211321	0.057211883	58.19021478
M6316	3A	60005414	0.076252819	0.154639175	99	-0.014777005	0.021092778	0.058845362	61.5604739
M10368	5A	689204261	0.07631255	0.422680412	99	-0.014777005	0.021077944	0.060057454	64.1226273
M11375	5B	620654423	0.076318554	0.412371134	99	-0.014777005	0.021076453	0.069142819	-84.99074562
M12570	6A	531103684	0.076418833	0.443298969	99	-0.014777005	0.02105158	0.068028031	-82.27223016
M1383	1B	468389248	0.076569885	0.402061856	99	-0.014777005	0.021014181	0.056865274	57.48727807
M11993	5D	548685020	0.076575953	0.463917526	99	-0.014777005	0.02101268	0.054182333	52.19067134
M6862	3A	0	0.076588143	0.06185567	99	-0.014777005	0.021009666	0.074268882	-98.05985394
M6866	3A	739951852	0.076588143	0.06185567	99	-0.014777005	0.021009666	0.074268882	98.05985394
M8482	3D	577409526	0.076671571	0.24742268	99	-0.014777005	0.02098905	0.059656854	-63.27004759
M10315	5A	444140600	0.07668715	0.484536082	99	-0.014777005	0.020985203	0.068375012	83.11364114
M2828	2A	412255299	0.076751613	0.371134021	99	-0.014777005	0.020969294	0.058895484	61.66538749
M7774	3B	727794861	0.076940412	0.134020619	99	-0.014777005	0.020922782	0.062172191	-68.71789102
M1505	1B	57318239	0.077078092	0.443298969	99	-0.014777005	0.020888943	0.066392816	-78.36455178
M6926	3B	8262440	0.077136619	0.484536082	99	-0.014777005	0.020874578	0.059627322	63.20742352
M11136	5B	511056182	0.077148398	0.24742268	99	-0.014777005	0.020871689	0.062225285	68.83530896
M4340	2B	422190933	0.077193727	0.164948454	99	-0.014777005	0.020860573	0.060722934	-65.55155035
M1256	1B	510601562	0.077204751	0.164948454	99	-0.014777005	0.020857871	0.064276655	-73.44868123
M8319	3D	37969650	0.077220846	0.18556701	99	-0.014777005	0.020853926	0.059741558	-63.44984401
M13155	6B	0	0.077268916	0.350515464	99	-0.014777005	0.020842151	0.056378246	-56.50678458
M12453	6A	115329227	0.077271273	0.391752577	99	-0.014777005	0.020841574	0.082499877	120.9996395
M12490	6A	82038144	0.077271273	0.391752577	99	-0.014777005	0.020841574	0.082499877	120.9996395
M1289	1B	392530020	0.077316024	0.144329897	99	-0.014777005	0.020830619	0.060231565	-64.49495886
M9759	4D	300724319	0.077338958	0.24742268	99	-0.014777005	0.020825008	0.064026785	72.87874235
M1545	1B	564637524	0.07737697	0.432989691	99	-0.014777005	0.020815711	0.05429229	-52.40271652
M7185	3B	825539318	0.077405222	0.309278351	99	-0.014777005	0.020808805	0.056284802	56.31962533
M6180	3A	353247178	0.07743157	0.391752577	99	-0.014777005	0.020802366	0.068403202	-83.18218655
M1029	1B	206100463	0.077434512	0.092783505	99	-0.014777005	0.020801648	0.06912313	84.94234861
M11995	5D	548844664	0.077470982	0.391752577	99	-0.014777005	0.02079274	0.054055553	-51.94671572
M388	1A	511415495	0.077560803	0.402061856	99	-0.014777005	0.020770822	0.057580748	58.94297927
M12560	6A	520667467	0.077566322	0.412371134	99	-0.014777005	0.020769476	0.052852894	49.66094972
M14169	7A	11374457	0.077644953	0.329896907	99	-0.014777005	0.020750312	0.090794549	-146.5537813
M1318	1B	505491281	0.077658198	0.216494845	99	-0.014777005	0.020747086	0.058081131	59.97187163
M9178	4A	25353003	0.077692114	0.103092784	99	-0.014777005	0.020738828	0.075356506	100.9529411
M3291	2A	645613495	0.077705815	0.381443299	99	-0.014777005	0.020735493	0.061115243	-66.40129723
M9289	4A	11455079	0.077788145	0.175257732	99	-0.014777005	0.020715468	0.059706444	63.37527844
M4552	2B	565077064	0.077830217	0.309278351	99	-0.014777005	0.020705244	0.069604054	-86.12843212
M6898	3B	2259539	0.078011241	0.134020619	99	-0.014777005	0.020661321	0.064632145	-74.26336304
M15339	7B	254066318	0.078129575	0.226804124	99	-0.014777005	0.020632669	0.063415675	-71.49418381
M9308	4A	1131864	0.078376008	0.463917526	99	-0.014777005	0.020573152	0.053341162	50.58274705
M5340	2B	22348080	0.07840506	0.113402062	99	-0.014777005	0.020566149	0.064964626	75.02938055
M10092	5A	473321191	0.078451147	0.381443299	99	-0.014777005	0.020555046	0.06534515	75.9109089
M216	1A	288094235	0.078531749	0.030927835	99	-0.014777005	0.020535644	0.085361746	129.5400473
M11979	5D	68534792	0.07854283	0.402061856	99	-0.014777005	0.020532979	0.05270318	49.38000395
M14578	7A	0	0.078669233	0.412371134	99	-0.014777005	0.020502601	0.059511046	62.96114752
M7351	3B	124651375	0.078707163	0.391752577	99	-0.014777005	0.020493496	0.056884387	-57.52592876
M3834	2B	69275351	0.078766319	0.484536082	99	-0.014777005	0.020479306	0.06543939	76.13002332
M2518	2A	33343837	0.078779319	0.113402062	99	-0.014777005	0.020476189	0.0618404	-67.98640217
M10911	5B	369307760	0.079160728	0.319587629	99	-0.014777005	0.020384989	0.063620153	-71.95597921
M6470	3A	61285842	0.079207016	0.360824742	99	-0.014777005	0.020373954	0.082794201	-121.8645276
M5177	2B	0	0.079208881	0.268041237	99	-0.014777005	0.02037351	0.056030843	-55.8125402
M9152	4A	441240399	0.079477045	0.463917526	99	-0.014777005	0.020309719	0.066937329	-79.6552183
M4092	2B	445251666	0.079544371	0.237113402	99	-0.014777005	0.020293741	0.056652942	57.0587705
M10968	5B	393940604	0.079625657	0.340206186	99	-0.014777005	0.020274469	0.053997341	51.83489479
M11373	5B	620654423	0.079700365	0.082474227	99	-0.014777005	0.020256775	0.066401581	78.3852429
M2627	2A	102051868	0.079711557	0.391752577	99	-0.014777005	0.020254126	0.07612791	-103.0303774
M11361	5B	180679040	0.079775671	0.298969072	99	-0.014777005	0.020238959	0.068954647	84.52877128
M3928	2B	180555363	0.079839912	0.103092784	99	-0.014777005	0.020223775	0.064656429	74.31917874
M2803	2A	109064436	0.07991378	0.24742268	99	-0.014777005	0.020206332	0.054826173	53.43838708
M5233	2B	794002225	0.079918563	0.319587629	99	-0.014777005	0.020205203	0.06341649	71.49602108
M2337	2A	438585017	0.079953087	0.484536082	99	-0.014777005	0.020197057	0.083803379	-124.8534445
M2695	2A	227082704	0.079953087	0.484536082	99	-0.014777005	0.020197057	0.083803379	-124.8534445
M2723	2A	502634131	0.079953087	0.484536082	99	-0.014777005	0.020197057	0.083803379	-124.8534445
M2447	2A	10314254	0.079953087	0.484536082	99	-0.014777005	0.020197057	0.083803379	124.8534445
M2465	2A	20237416	0.079953087	0.484536082	99	-0.014777005	0.020197057	0.083803379	124.8534445
M13640	6B	696194020	0.080027033	0.443298969	99	-0.014777005	0.020179622	0.054084537	-52.00243783
M6285	3A	695818860	0.080146933	0.371134021	99	-0.014777005	0.020151391	0.078516139	-109.5961627
M633	1A	481012178	0.080197178	0.453608247	99	-0.014777005	0.020139574	0.062666153	69.81416318
M2781	2A	401601805	0.080203457	0.154639175	99	-0.014777005	0.020138098	0.075529713	101.4175562
M92	1A	26426298	0.080222026	0.06185567	99	-0.014777005	0.020133733	0.074019167	97.40154747
M7071	3B	15205844	0.080313148	0.072164948	99	-0.014777005	0.020112331	0.06882515	-84.21157751
M9028	4A	49368188	0.080405688	0.06185567	99	-0.014777005	0.020090622	0.080524045	-115.2732773
M9997	5A	69102517	0.080548599	0.371134021	99	-0.014777005	0.020057151	0.063641941	72.00527492
M4018	2B	535286874	0.080654331	0.360824742	99	-0.014777005	0.02003243	0.057727796	59.24441658
M8903	4A	674340235	0.080677784	0.226804124	99	-0.014777005	0.020026951	0.061792008	67.88003916
M2033	1D	21146599	0.08070661	0.402061856	99	-0.014777005	0.020020219	0.059266973	62.44576261
M2526	2A	36234739	0.080753179	0.402061856	99	-0.014777005	0.02000935	0.061010542	-66.17397798
M1556	1B	564574859	0.08088746	0.164948454	99	-0.014777005	0.019978047	0.063123911	-70.83783331
M2330	2A	14379378	0.080952564	0.412371134	99	-0.014777005	0.01996289	0.063986778	-72.78769388
M3275	2A	768676643	0.080956332	0.360824742	99	-0.014777005	0.019962013	0.061016582	-66.18708093
M628	1A	577986626	0.080964374	0.463917526	99	-0.014777005	0.019960142	0.051426056	-47.01580805
M15235	7B	0	0.080969165	0.092783505	99	-0.014777005	0.019959027	0.06630608	78.15993227
M617	1A	578933488	0.08115524	0.24742268	99	-0.014777005	0.019915792	0.068032852	-82.28389274
M13284	6B	460206599	0.08131026	0.453608247	99	-0.014777005	0.019879855	0.053520579	50.92359716
M6501	3A	169440485	0.081415214	0.422680412	99	-0.014777005	0.019855567	0.056923149	57.60435461
M11607	5B	587341324	0.081420341	0.06185567	99	-0.014777005	0.019854382	0.079442709	112.1981162
M12441	6A	67377724	0.081420341	0.06185567	99	-0.014777005	0.019854382	0.079442709	112.1981162
M1045	1B	94011977	0.08143792	0.329896907	99	-0.014777005	0.019850317	0.061392275	-67.00464663
M9320	4A	336207656	0.081550165	0.412371134	99	-0.014777005	0.019824388	0.052749906	49.46760187
M9340	4A	0	0.081559703	0.195876289	99	-0.014777005	0.019822187	0.059987067	-63.97241324
M2082	1D	52362168	0.081587308	0.175257732	99	-0.014777005	0.019815816	0.078864154	110.5698623
M13602	6B	79255016	0.081676635	0.113402062	99	-0.014777005	0.01979522	0.062114706	68.5908748
M2386	2A	0	0.081701692	0.484536082	99	-0.014777005	0.019789446	0.079932886	-113.5869551
M2725	2A	0	0.081701692	0.484536082	99	-0.014777005	0.019789446	0.079932886	-113.5869551
M9800	4D	482953875	0.081720326	0.18556701	99	-0.014777005	0.019785154	0.058999486	61.88336695
M13274	6B	196677969	0.081787636	0.432989691	99	-0.014777005	0.01976966	0.062346517	-69.10379066
M340	1A	0	0.081834577	0.030927835	99	-0.014777005	0.019758862	0.083475589	-123.878648
M14541	7A	64739187	0.081856054	0.072164948	99	-0.014777005	0.019753924	0.069163152	85.04073965
M1753	1B	636316329	0.081860788	0.051546392	99	-0.014777005	0.019752836	0.074865447	-99.64151272
M11072	5B	503323823	0.082100809	0.432989691	99	-0.014777005	0.019697751	0.064175885	-73.21856469
M5176	2B	0	0.082213197	0.474226804	99	-0.014777005	0.019672018	0.054739355	-53.26927986
M12478	6A	226020901	0.082238572	0.412371134	99	-0.014777005	0.019666214	0.07096148	-89.52056284
M861	1B	16897282	0.08225888	0.432989691	99	-0.014777005	0.01966157	0.068798759	-84.14700763
M6683	3A	294935009	0.082438465	0.381443299	99	-0.014777005	0.019620557	0.063324923	71.28970466
M111	1A	329686048	0.082472199	0.443298969	99	-0.014777005	0.019612864	0.055415347	-54.59307897
M6410	3A	397200871	0.082545265	0.206185567	99	-0.014777005	0.019596213	0.059390174	62.70564819
M13173	6B	102070380	0.082590953	0.340206186	99	-0.014777005	0.019585809	0.056234101	56.21820608
M449	1A	532773229	0.082649664	0.360824742	99	-0.014777005	0.019572449	0.059527519	62.99600846
M8011	3B	533130365	0.082686666	0.134020619	99	-0.014777005	0.019564035	0.062313185	69.02992054
M3864	2B	0	0.082691732	0.103092784	99	-0.014777005	0.019562883	0.067054707	79.93482224
M14917	7A	700180481	0.082707652	0.030927835	99	-0.014777005	0.019559264	0.08580153	-130.8782665
M14273	7A	12800907	0.082722838	0.278350515	99	-0.014777005	0.019555813	0.05332237	50.54711335
M6394	3A	363608529	0.0827523	0.453608247	99	-0.014777005	0.019549119	0.053462442	-50.81302677
M13653	6B	699020713	0.082866861	0.402061856	99	-0.014777005	0.019523116	0.059622755	63.19774113
M3614	2B	26497203	0.083056588	0.257731959	99	-0.014777005	0.019480138	0.061333185	-66.87572578
M3313	2A	763309825	0.083118268	0.443298969	99	-0.014777005	0.019466189	0.056457696	56.66615841
M3624	2B	24266934	0.083131034	0.020618557	99	-0.014777005	0.019463304	0.090839586	-146.6992069
M1628	1B	144111278	0.083182965	0.494845361	99	-0.014777005	0.019451571	0.060695849	-65.4930861
M1451	1B	45280118	0.083252043	0.257731959	99	-0.014777005	0.019435975	0.05944648	62.82460362
M13656	6B	700666990	0.083254754	0.237113402	99	-0.014777005	0.019435364	0.055427222	-54.61647954
M1623	1B	400908048	0.083315391	0.268041237	99	-0.014777005	0.019421686	0.058517014	60.87539443
M2174	1D	415773502	0.083323865	0.371134021	99	-0.014777005	0.019419776	0.060133776	64.28570796
M4521	2B	669052155	0.083412609	0.298969072	99	-0.014777005	0.019399781	0.063211999	-71.03567726
M11493	5B	481184562	0.083451533	0.12371134	99	-0.014777005	0.019391018	0.063823049	72.41567345
M1277	1B	379091249	0.083509652	0.06185567	99	-0.014777005	0.019377943	0.069609039	86.14076913
M3972	2B	128269909	0.083582752	0.443298969	99	-0.014777005	0.019361511	0.053561241	-51.00100516
M2452	2A	4351582	0.083699263	0.18556701	99	-0.014777005	0.019335354	0.069315331	85.41537934
M5127	2B	221893152	0.083739931	0.402061856	99	-0.014777005	0.019326233	0.063358015	71.3642331
M426	1A	507936918	0.083764575	0.257731959	99	-0.014777005	0.019320708	0.059100414	-62.09526978
M11162	5B	492257250	0.083860883	0.402061856	99	-0.014777005	0.019299135	0.070199244	-87.60771338
M1095	1B	342391060	0.083987511	0.350515464	99	-0.014777005	0.019270812	0.0938179	-156.4764156
M1359	1B	30505270	0.083987511	0.350515464	99	-0.014777005	0.019270812	0.0938179	-156.4764156
M2673	2A	0	0.08404233	0.474226804	99	-0.014777005	0.019258565	0.078923007	110.7349523
M2484	2A	347461965	0.084130462	0.412371134	99	-0.014777005	0.019238894	0.063661492	72.04952173
M82	1A	531630305	0.084330188	0.474226804	99	-0.014777005	0.019194399	0.060698833	-65.49952524
M9394	4A	0	0.084365678	0.134020619	99	-0.014777005	0.019186505	0.059113088	62.12190564
M14834	7A	663768828	0.08440345	0.329896907	99	-0.014777005	0.019178107	0.077499548	106.7765321
M7796	3B	508925402	0.084422826	0.206185567	99	-0.014777005	0.019173801	0.055942521	55.63672252
M6564	3A	650055169	0.084506024	0.092783505	99	-0.014777005	0.019155322	0.070524254	-88.42080738
M14185	7A	10270141	0.084608526	0.463917526	99	-0.014777005	0.019132584	0.062941582	-70.42920343
M7547	3B	498344378	0.084637473	0.350515464	99	-0.014777005	0.019126168	0.078140871	108.5510356
M363	1A	497201516	0.084687691	0.319587629	99	-0.014777005	0.019115043	0.073913897	-97.1246968
M9143	4A	304763961	0.084701616	0.319587629	99	-0.014777005	0.01911196	0.05785796	59.5118853
M6712	3A	715352220	0.084709155	0.484536082	99	-0.014777005	0.019110291	0.051977955	48.03036078
M4339	2B	422190933	0.084844889	0.494845361	99	-0.014777005	0.019080266	0.055426127	54.61432181
M5964	2D	57217895	0.084882189	0.154639175	99	-0.014777005	0.019072024	0.059851239	63.68303626
M8399	3D	294644099	0.084896532	0.319587629	99	-0.014777005	0.019068856	0.059329114	-62.57677743
M3618	2B	49906735	0.084981541	0.422680412	99	-0.014777005	0.019050092	0.05325461	-50.41872902
M15113	7A	623342327	0.085046778	0.113402062	99	-0.014777005	0.019035705	0.070494413	-88.34599583
M1312	1B	328983636	0.085059545	0.082474227	99	-0.014777005	0.019032891	0.07399475	-97.33729762
M11478	5B	580847772	0.085067537	0.092783505	99	-0.014777005	0.01903113	0.066564212	78.7696763
M11324	5B	0	0.085078391	0.412371134	99	-0.014777005	0.019028738	0.075479387	-101.2824506
M4128	2B	52218686	0.085161807	0.237113402	99	-0.014777005	0.019010368	0.055247326	-54.26252493
M701	1B	3572450	0.085166996	0.371134021	99	-0.014777005	0.019009226	0.057558994	-58.89844946
M10616	5B	20834940	0.085171021	0.381443299	99	-0.014777005	0.01900834	0.06514362	-75.44339861
M12945	6A	468839603	0.085217348	0.381443299	99	-0.014777005	0.018998148	0.065316307	75.84391126
M6487	3A	598916422	0.085326397	0.453608247	99	-0.014777005	0.01897418	0.055894683	55.54161005
M12689	6A	573692004	0.085519259	0.494845361	99	-0.014777005	0.018931873	0.062013771	68.36813816
M5249	2B	765677047	0.085670037	0.030927835	99	-0.014777005	0.018898871	0.084173154	-125.9576859
M11433	5B	156196818	0.085811535	0.371134021	99	-0.014777005	0.018867958	0.056916318	-57.59052989
M386	1A	197865491	0.085863845	0.402061856	99	-0.014777005	0.018856544	0.054088091	-52.0092731
M9313	4A	730004142	0.085982053	0.18556701	99	-0.014777005	0.01883078	0.059980599	63.9586183
M6837	3A	374475866	0.086014673	0.113402062	99	-0.014777005	0.018823677	0.062355187	69.12301121
M7603	3B	400339180	0.08604515	0.381443299	99	-0.014777005	0.018817043	0.069737472	86.45893237
M14081	6D	459549228	0.086045457	0.412371134	99	-0.014777005	0.018816976	0.062941575	-70.42918938
M11431	5B	654138408	0.086167354	0.371134021	99	-0.014777005	0.01879047	0.052829376	49.61676442
M677	1A	588018429	0.086185939	0.381443299	99	-0.014777005	0.018786432	0.08600991	131.5147491
M2667	2A	13835059	0.086226729	0.432989691	99	-0.014777005	0.018777574	0.064988068	-75.08353751
M2817	2A	477627488	0.086287968	0.288659794	99	-0.014777005	0.018764283	0.064814293	-74.68253417
M3377	2A	612169049	0.086324106	0.463917526	99	-0.014777005	0.018756445	0.05578583	55.3254894
M9982	5A	59566378	0.086496774	0.484536082	99	-0.014777005	0.018719044	0.061664048	67.59919702
M1281	1B	442620108	0.086509508	0.226804124	99	-0.014777005	0.018716289	0.062396215	69.21400263
M11334	5B	532933730	0.086532946	0.319587629	99	-0.014777005	0.018711219	0.056581111	56.91417103
M13154	6B	88747690	0.086616534	0.226804124	99	-0.014777005	0.018693151	0.05761458	59.01226286
M10324	5A	164201064	0.086641148	0.24742268	99	-0.014777005	0.018687834	0.05430858	52.43416666
M7793	3B	732431585	0.086641283	0.051546392	99	-0.014777005	0.018687805	0.076804056	-104.8686761
M7305	3B	537220619	0.086709081	0.371134021	99	-0.014777005	0.018673169	0.055611735	-54.980712
M15153	7A	739414265	0.086758991	0.412371134	99	-0.014777005	0.018662402	0.073887064	-97.05419
M9839	5A	4082305	0.086761584	0.422680412	99	-0.014777005	0.018661843	0.056957874	-57.67465706
M8052	3B	589410123	0.086852969	0.041237113	99	-0.014777005	0.018642148	0.07950999	112.3882389
M9330	4A	731504837	0.086919456	0.206185567	99	-0.014777005	0.018627834	0.057463722	-58.70363188
M6939	3B	0	0.086955825	0.463917526	99	-0.014777005	0.018620008	0.06621599	-77.94768586
M11473	5B	549562653	0.087173946	0.216494845	99	-0.014777005	0.018573152	0.054078792	51.99139182
M11033	5B	514824088	0.087340455	0.329896907	99	-0.014777005	0.01853747	0.05679937	-57.35410586
M8672	4A	195228281	0.087422649	0.371134021	99	-0.014777005	0.018519884	0.059553131	63.05022876
M9749	4D	95663405	0.087436134	0.103092784	99	-0.014777005	0.018517001	0.06317697	-70.95696921
M14250	7A	0	0.087492592	0.298969072	99	-0.014777005	0.018504934	0.056255829	-56.2616588
M4612	2B	0	0.087531155	0.340206186	99	-0.014777005	0.018496696	0.051669483	47.46196323
M6265	3A	0	0.087585193	0.092783505	99	-0.014777005	0.01848516	0.076243499	-103.343487
M113	1A	12427365	0.087647746	0.237113402	99	-0.014777005	0.018471816	0.05617116	56.09243142
M13529	6B	655890375	0.087672168	0.237113402	99	-0.014777005	0.018466609	0.065967451	77.36363753
M12452	6A	98982876	0.087697259	0.072164948	99	-0.014777005	0.018461261	0.078042153	-108.2769354
M12504	6A	16791756	0.087697259	0.072164948	99	-0.014777005	0.018461261	0.078042153	-108.2769354
M12464	6A	171029382	0.087697259	0.072164948	99	-0.014777005	0.018461261	0.078042153	108.2769354
M9343	4A	7773196	0.087759669	0.494845361	99	-0.014777005	0.018447966	0.056165617	-56.08136144
M6832	3A	320011979	0.087793414	0.412371134	99	-0.014777005	0.018440781	0.068981945	84.59571106
M7967	3B	760963408	0.087821285	0.494845361	99	-0.014777005	0.01843485	0.068775456	84.09001458
M9006	4A	668285271	0.08800924	0.206185567	99	-0.014777005	0.018394904	0.060436959	64.93557434
M4539	2B	670299111	0.088119367	0.453608247	99	-0.014777005	0.018371543	0.063411977	71.48584519
M14896	7A	694049602	0.08828592	0.484536082	99	-0.014777005	0.018336272	0.055949864	-55.65132957
M1935	1B	678465588	0.088424946	0.360824742	99	-0.014777005	0.018306887	0.082382549	-120.6557229
M3362	2A	0	0.088705985	0.484536082	99	-0.014777005	0.018247641	0.057316898	58.40403254
M9765	4D	394378216	0.088834401	0.092783505	99	-0.014777005	0.018220639	0.068276185	82.87355358
M9993	5A	110379087	0.088856413	0.381443299	99	-0.014777005	0.018216014	0.058171084	60.15777902
M4531	2B	673234348	0.089005577	0.216494845	99	-0.014777005	0.018184712	0.057578347	58.93806315
M9003	4A	297888928	0.08902864	0.350515464	99	-0.014777005	0.018179877	0.059054088	61.99796003
M8553	4A	6919003	0.089199002	0.494845361	99	-0.014777005	0.018144206	0.059830292	-63.63846905
M5982	2D	642441495	0.089350147	0.453608247	99	-0.014777005	0.018112622	0.068858623	-84.29351098
M12357	6A	25429158	0.08938097	0.391752577	99	-0.014777005	0.018106188	0.066476596	78.56244941
M13070	6B	17658870	0.089456621	0.154639175	99	-0.014777005	0.018090408	0.060372864	-64.79791518
M8533	4A	17017869	0.089462578	0.092783505	99	-0.014777005	0.018089166	0.066433251	78.46003203
M14504	7A	55923161	0.089659357	0.082474227	99	-0.014777005	0.018048191	0.067959485	-82.10651709
M14132	7A	4140180	0.089740812	0.319587629	99	-0.014777005	0.018031258	0.052517905	-49.03342859
M5408	2D	20432790	0.089829541	0.113402062	99	-0.014777005	0.018012833	0.062652749	69.78430115
M7948	3B	761498146	0.08991895	0.371134021	99	-0.014777005	0.017994287	0.079343423	-111.9178458
M4466	2B	613901739	0.089965049	0.474226804	99	-0.014777005	0.017984733	0.063296254	71.2251703
M11441	5B	546780922	0.090125898	0.402061856	99	-0.014777005	0.017951438	0.053268122	-50.44431597
M6101	3A	18171651	0.090213757	0.432989691	99	-0.014777005	0.017933279	0.059560702	63.06626139
M13651	6B	0	0.090219542	0.268041237	99	-0.014777005	0.017932084	0.058416428	60.66629401
M10764	5B	389160968	0.090311735	0.443298969	99	-0.014777005	0.017913052	0.066457599	78.51755601
M1364	1B	509798209	0.090375449	0.298969072	99	-0.014777005	0.017899912	0.057981111	-59.76549832
M10119	5A	340173231	0.090516172	0.278350515	99	-0.014777005	0.017870925	0.055184248	54.1386886
M4299	2B	522194839	0.090583314	0.412371134	99	-0.014777005	0.017857112	0.065374325	75.97870891
M13177	6B	0	0.090641352	0.443298969	99	-0.014777005	0.017845182	0.053362117	-50.62249812
M5027	2B	758922449	0.090859713	0.381443299	99	-0.014777005	0.01780037	0.055063623	-53.90226716
M5941	2D	625109798	0.090879828	0.340206186	99	-0.014777005	0.017796248	0.059195174	62.29455327
M8573	4A	211467606	0.09093171	0.134020619	99	-0.014777005	0.01778562	0.060166354	-64.3553811
M14683	7A	145828927	0.091022191	0.319587629	99	-0.014777005	0.017767103	0.054489827	-52.78473312
M8524	3D	612028308	0.091069282	0.237113402	99	-0.014777005	0.017757473	0.059466361	-62.86663358
M13685	6B	707207597	0.091107336	0.257731959	99	-0.014777005	0.017749696	0.058453633	60.74359579
M4344	2B	523028887	0.09123308	0.474226804	99	-0.014777005	0.017724022	0.056403049	56.55651461
M14171	7A	501554142	0.091247655	0.18556701	99	-0.014777005	0.017721048	0.062505454	69.45656508
M10621	5B	4826033	0.091266446	0.278350515	99	-0.014777005	0.017717215	0.055211505	-54.19218194
M10742	5B	356684358	0.091310981	0.319587629	99	-0.014777005	0.017708136	0.101675509	-183.7850497
M1975	1D	4243757	0.091317924	0.381443299	99	-0.014777005	0.01770672	0.057916612	-59.63260393
M7212	3B	0	0.091405919	0.422680412	99	-0.014777005	0.017688795	0.058503611	60.84751012
M1266	1B	328823086	0.091596717	0.453608247	99	-0.014777005	0.017649994	0.053912553	51.67223732
M38	1A	2276875	0.09163964	0.350515464	99	-0.014777005	0.017641277	0.06075297	65.61641615
M8087	3B	0	0.091663847	0.381443299	99	-0.014777005	0.017636363	0.076430998	-103.8524002
M8003	3B	0	0.091663847	0.381443299	99	-0.014777005	0.017636363	0.076430998	103.8524002
M8017	3B	771630784	0.091663847	0.381443299	99	-0.014777005	0.017636363	0.076430998	103.8524002
M8046	3B	355244568	0.091663847	0.381443299	99	-0.014777005	0.017636363	0.076430998	103.8524002
M8085	3B	796453795	0.091663847	0.381443299	99	-0.014777005	0.017636363	0.076430998	103.8524002
M6517	3A	640766125	0.091709429	0.463917526	99	-0.014777005	0.017627114	0.067516624	-81.03990199
M14689	7A	127293948	0.091721654	0.494845361	99	-0.014777005	0.017624635	0.053044931	-50.02248445
M428	1A	514770962	0.091791501	0.402061856	99	-0.014777005	0.017610474	0.062081487	-68.51753014
M6112	3A	30196842	0.091813114	0.443298969	99	-0.014777005	0.017606095	0.050840334	45.95092593
M2085	1D	608803869	0.09184925	0.494845361	99	-0.014777005	0.017598775	0.08652501	-133.0947076
M2178	1D	432331312	0.09184925	0.494845361	99	-0.014777005	0.017598775	0.08652501	-133.0947076
M2315	1D	0	0.09184925	0.494845361	99	-0.014777005	0.017598775	0.08652501	-133.0947076
M2393	2A	24002743	0.09184925	0.494845361	99	-0.014777005	0.017598775	0.08652501	-133.0947076
M2403	2A	3954847	0.09184925	0.494845361	99	-0.014777005	0.017598775	0.08652501	-133.0947076
M2420	2A	11768354	0.09184925	0.494845361	99	-0.014777005	0.017598775	0.08652501	-133.0947076
M2427	2A	21149223	0.09184925	0.494845361	99	-0.014777005	0.017598775	0.08652501	-133.0947076
M2479	2A	17830049	0.09184925	0.494845361	99	-0.014777005	0.017598775	0.08652501	-133.0947076
M2685	2A	283070572	0.09184925	0.494845361	99	-0.014777005	0.017598775	0.08652501	-133.0947076
M2777	2A	0	0.09184925	0.494845361	99	-0.014777005	0.017598775	0.08652501	-133.0947076
M2780	2A	458670664	0.09184925	0.494845361	99	-0.014777005	0.017598775	0.08652501	-133.0947076
M2323	2A	2810400	0.09184925	0.494845361	99	-0.014777005	0.017598775	0.08652501	133.0947076
M2327	2A	4990266	0.09184925	0.494845361	99	-0.014777005	0.017598775	0.08652501	133.0947076
M2351	2A	14900108	0.09184925	0.494845361	99	-0.014777005	0.017598775	0.08652501	133.0947076
M2383	2A	19836679	0.09184925	0.494845361	99	-0.014777005	0.017598775	0.08652501	133.0947076
M2402	2A	13475674	0.09184925	0.494845361	99	-0.014777005	0.017598775	0.08652501	133.0947076
M2405	2A	8543360	0.09184925	0.494845361	99	-0.014777005	0.017598775	0.08652501	133.0947076
M2413	2A	21041554	0.09184925	0.494845361	99	-0.014777005	0.017598775	0.08652501	133.0947076
M2423	2A	16730048	0.09184925	0.494845361	99	-0.014777005	0.017598775	0.08652501	133.0947076
M2488	2A	2944702	0.09184925	0.494845361	99	-0.014777005	0.017598775	0.08652501	133.0947076
M2493	2A	10263416	0.09184925	0.494845361	99	-0.014777005	0.017598775	0.08652501	133.0947076
M2677	2A	0	0.09184925	0.494845361	99	-0.014777005	0.017598775	0.08652501	133.0947076
M2679	2A	14418775	0.09184925	0.494845361	99	-0.014777005	0.017598775	0.08652501	133.0947076
M2681	2A	9016220	0.09184925	0.494845361	99	-0.014777005	0.017598775	0.08652501	133.0947076
M2699	2A	160196749	0.09184925	0.494845361	99	-0.014777005	0.017598775	0.08652501	133.0947076
M2707	2A	403212705	0.09184925	0.494845361	99	-0.014777005	0.017598775	0.08652501	133.0947076
M2721	2A	435472864	0.09184925	0.494845361	99	-0.014777005	0.017598775	0.08652501	133.0947076
M2731	2A	179992753	0.09184925	0.494845361	99	-0.014777005	0.017598775	0.08652501	133.0947076
M2769	2A	153448420	0.09184925	0.494845361	99	-0.014777005	0.017598775	0.08652501	133.0947076
M4575	2B	692104873	0.091861645	0.381443299	99	-0.014777005	0.017596265	0.058049703	-59.90698636
M4489	2B	643092677	0.0919083	0.474226804	99	-0.014777005	0.017586821	0.065776433	76.91625039
M8920	4A	654340945	0.091910535	0.391752577	99	-0.014777005	0.017586369	0.051584991	-47.30686825
M4576	2B	692104873	0.091979703	0.092783505	99	-0.014777005	0.017572377	0.063395229	71.4480899
M737	1B	0	0.091982368	0.12371134	99	-0.014777005	0.017571838	0.062648534	69.77491155
M4500	2B	663838688	0.091986865	0.298969072	99	-0.014777005	0.017570929	0.064377436	73.67918698
M11005	5B	481080959	0.091995295	0.432989691	99	-0.014777005	0.017569225	0.054390767	52.592988
M4758	2B	0	0.092038967	0.24742268	99	-0.014777005	0.017560399	0.056476575	-56.70406219
M7551	3B	473710563	0.092052882	0.113402062	99	-0.014777005	0.017557587	0.062594266	-69.65408297
M8885	4A	631976712	0.092070614	0.360824742	99	-0.014777005	0.017554006	0.058726753	61.31255964
M7477	3B	311762515	0.092250373	0.134020619	99	-0.014777005	0.017517738	0.062614444	-69.69899735
M6698	3A	711287701	0.092462833	0.381443299	99	-0.014777005	0.017474973	0.057168569	-58.10213923
M3975	2B	293250631	0.092498431	0.340206186	99	-0.014777005	0.017467818	0.071049269	89.74219766
M9338	4A	728781198	0.092563783	0.391752577	99	-0.014777005	0.017454691	0.060601503	65.28963911
M7640	3B	439813360	0.092616735	0.268041237	99	-0.014777005	0.017444062	0.055995572	55.7422945
M2684	2A	11201465	0.092690676	0.371134021	99	-0.014777005	0.017429232	0.060635751	65.36345427
M9336	4A	0	0.092699768	0.494845361	99	-0.014777005	0.017427409	0.056352764	56.45571608
M1541	1B	545644656	0.09274178	0.484536082	99	-0.014777005	0.01741899	0.060063316	-64.13514594
M2343	2A	7919418	0.092847063	0.360824742	99	-0.014777005	0.017397908	0.073652976	96.44019262
M1572	1B	724589345	0.092875965	0.381443299	99	-0.014777005	0.017392126	0.055676864	55.10956817
M6042	3A	0	0.092920063	0.24742268	99	-0.014777005	0.017383306	0.056287692	-56.32540917
M8166	3B	434275633	0.092951459	0.443298969	99	-0.014777005	0.01737703	0.063360524	-71.36988554
M12449	6A	431192916	0.092966719	0.391752577	99	-0.014777005	0.017373981	0.079791901	113.1866203
M13836	6B	0	0.093010429	0.278350515	99	-0.014777005	0.017365249	0.052727333	49.42527293
M15545	7B	641684991	0.093296384	0.474226804	99	-0.014777005	0.017308234	0.067969694	82.13118772
M13514	6B	517558592	0.093406745	0.041237113	99	-0.014777005	0.017286281	0.080021356	113.8385328
M7786	3B	671011745	0.093415076	0.24742268	99	-0.014777005	0.017284626	0.056247709	56.24541813
M1422	1B	531867322	0.093462547	0.154639175	99	-0.014777005	0.017275193	0.057155698	58.0759787
M33	1A	3982825	0.093463875	0.360824742	99	-0.014777005	0.017274929	0.068606514	-83.67740045
M6580	3A	659798154	0.093467311	0.226804124	99	-0.014777005	0.017274246	0.069281793	-85.33274424
M4280	2B	636461528	0.093489993	0.103092784	99	-0.014777005	0.017269741	0.064874751	-74.82192574
M14144	7A	4440321	0.093558083	0.278350515	99	-0.014777005	0.017256224	0.058443195	-60.72190199
M12267	6A	219188654	0.093677702	0.453608247	99	-0.014777005	0.017232505	0.060546054	65.17021588
M394	1A	623753947	0.093689563	0.257731959	99	-0.014777005	0.017230155	0.061603853	67.46728417
M14895	7A	694049602	0.093793553	0.340206186	99	-0.014777005	0.017209565	0.053855209	51.56237446
M9996	5A	55341971	0.0938008	0.06185567	99	-0.014777005	0.017208131	0.071681816	91.34724792
M9629	4B	653614624	0.093851801	0.268041237	99	-0.014777005	0.017198043	0.056841547	57.43931512
M1145	1B	37570116	0.093877021	0.288659794	99	-0.014777005	0.017193057	0.062874534	-70.27923511
M7409	3B	70909818	0.093911634	0.072164948	99	-0.014777005	0.017186216	0.067052779	-79.93022619
M7607	3B	434211602	0.093912764	0.391752577	99	-0.014777005	0.017185992	0.071375416	-90.5679992
M7629	3B	579446373	0.093912764	0.391752577	99	-0.014777005	0.017185992	0.071375416	-90.5679992
M7588	3B	523570235	0.093912764	0.391752577	99	-0.014777005	0.017185992	0.071375416	90.5679992
M7628	3B	580348846	0.093912764	0.391752577	99	-0.014777005	0.017185992	0.071375416	90.5679992
M7633	3B	0	0.093912764	0.391752577	99	-0.014777005	0.017185992	0.071375416	90.5679992
M11585	5B	686989852	0.093973293	0.412371134	99	-0.014777005	0.017174036	0.057708895	-59.20562677
M12599	6A	57659058	0.093984674	0.195876289	99	-0.014777005	0.017171789	0.060174959	64.37378915
M11658	5B	336655975	0.09400775	0.082474227	99	-0.014777005	0.017167233	0.06538978	76.01463616
M868	1B	5156091	0.094059983	0.432989691	99	-0.014777005	0.017156927	0.053222052	50.35709919
M3026	2A	721105596	0.094074465	0.216494845	99	-0.014777005	0.01715407	0.055925993	55.60385147
M9237	4A	727965119	0.094079625	0.051546392	99	-0.014777005	0.017153053	0.072040328	92.26326838
M10193	5A	3942824	0.094174664	0.226804124	99	-0.014777005	0.01713432	0.056207644	56.16532019
M8825	4A	537394269	0.094178766	0.371134021	99	-0.014777005	0.017133512	0.059828253	-63.63413018
M1809	1B	653681729	0.094318405	0.350515464	99	-0.014777005	0.017106028	0.057635325	59.05476873
M9799	4D	482953875	0.094435029	0.164948454	99	-0.014777005	0.017083108	0.060195838	-64.41846954
M13459	6B	50741757	0.094436696	0.309278351	99	-0.014777005	0.01708278	0.070877425	-89.30861129
M9406	4A	0	0.094612305	0.432989691	99	-0.014777005	0.017048328	0.061721574	67.72538045
M3587	2B	25050436	0.094646187	0.463917526	99	-0.014777005	0.017041689	0.051734355	47.58121764
M10783	5B	412238621	0.094777297	0.443298969	99	-0.014777005	0.017016023	0.066103154	-77.68225735
M13849	6B	715630902	0.094863235	0.195876289	99	-0.014777005	0.016999221	0.065916986	77.24531517
M15170	7B	66548049	0.09506128	0.18556701	99	-0.014777005	0.016960565	0.056123992	55.99826616
M8613	4A	475428443	0.095082826	0.226804124	99	-0.014777005	0.016956365	0.062024808	68.3924773
M11185	5B	513712343	0.095092816	0.134020619	99	-0.014777005	0.016954418	0.066877146	-79.5120465
M3042	2A	721963875	0.095109652	0.309278351	99	-0.014777005	0.016951137	0.05354463	50.96937629
M6590	3A	174036118	0.095242976	0.360824742	99	-0.014777005	0.016925178	0.05897092	61.82345636
M11154	5B	44575313	0.095273228	0.319587629	99	-0.014777005	0.016919294	0.058844743	-61.55917774
M3718	2B	77176639	0.095283581	0.329896907	99	-0.014777005	0.01691728	0.058052327	59.91240319
M7132	3B	24940760	0.095397852	0.278350515	99	-0.014777005	0.016895074	0.076139792	-103.0625411
M7610	3B	567001218	0.095472507	0.051546392	99	-0.014777005	0.016880582	0.073331593	-95.60040125
M7757	3B	703301297	0.095707617	0.092783505	99	-0.014777005	0.016835025	0.065716786	-76.77681749
M10461	5A	614408666	0.095724569	0.391752577	99	-0.014777005	0.016831745	0.054039769	51.91638364
M9525	4B	196094104	0.095851857	0.257731959	99	-0.014777005	0.016807137	0.052946302	-49.83663839
M8860	4A	49224781	0.095916245	0.494845361	99	-0.014777005	0.016794703	0.054427452	52.66395683
M4629	2B	427616803	0.095995193	0.453608247	99	-0.014777005	0.016779469	0.062140904	-68.64874499
M14312	7A	455466428	0.096047114	0.340206186	99	-0.014777005	0.016769459	0.063289549	71.21008124
M6915	3B	0	0.096059082	0.257731959	99	-0.014777005	0.016767152	0.062878241	-70.28752413
M3576	2B	33729208	0.096147088	0.288659794	99	-0.014777005	0.0167502	0.057178306	58.12193207
M6117	3A	15478548	0.096156627	0.474226804	99	-0.014777005	0.016748363	0.051496615	47.14491274
M2757	2A	415062138	0.096172176	0.381443299	99	-0.014777005	0.01674537	0.06001474	-64.03144927
M4815	2B	732342408	0.096329162	0.360824742	99	-0.014777005	0.016715182	0.08525228	-129.2080209
M9510	4B	481237158	0.096383395	0.288659794	99	-0.014777005	0.016704766	0.051234056	46.66539566
M4019	2B	678547100	0.096430378	0.268041237	99	-0.014777005	0.016695747	0.053526544	-50.93494939
M14718	7A	90552202	0.096430591	0.298969072	99	-0.014777005	0.016695706	0.0538369	-51.52732024
M8800	4A	602863944	0.096533889	0.030927835	99	-0.014777005	0.016675895	0.083214544	-123.1050733
M135	1A	20866783	0.096582805	0.381443299	99	-0.014777005	0.016666522	0.052972815	-49.88656176
M5831	2D	578880228	0.096645583	0.443298969	99	-0.014777005	0.0166545	0.064187503	73.24507633
M4069	2B	200573662	0.096710944	0.072164948	99	-0.014777005	0.016641993	0.06822537	-82.75024208
M6507	3A	614763369	0.09683106	0.443298969	99	-0.014777005	0.016619032	0.067636268	81.32737445
M1821	1B	658439447	0.096880361	0.371134021	99	-0.014777005	0.016609617	0.051236729	46.67026429
M15598	7B	241922776	0.097177853	0.319587629	99	-0.014777005	0.016552918	0.05654064	56.83278173
M4278	2B	547614694	0.097248088	0.113402062	99	-0.014777005	0.01653956	0.061695609	-67.66841277
M2546	2A	43370517	0.097255767	0.216494845	99	-0.014777005	0.0165381	0.059337501	-62.59447124
M7504	3B	414366969	0.097348602	0.082474227	99	-0.014777005	0.016520462	0.06764657	81.35214888
M14114	6D	0	0.097363427	0.134020619	99	-0.014777005	0.016517647	0.064255143	-73.39952673
M12044	6A	1033153	0.097487441	0.24742268	99	-0.014777005	0.016494118	0.058447052	-60.72991818
M10200	5A	0	0.097555303	0.072164948	99	-0.014777005	0.016481256	0.068956143	-84.53243874
M1844	1B	578815386	0.097562423	0.144329897	99	-0.014777005	0.016479907	0.06009427	64.20126646
M14630	7A	126783862	0.097670481	0.195876289	99	-0.014777005	0.01645945	0.056354557	56.45930853
M4871	2B	743417549	0.097756403	0.360824742	99	-0.014777005	0.016443201	0.05860626	-61.06122135
M8850	4A	163167984	0.097782811	0.391752577	99	-0.014777005	0.01643821	0.056885253	-57.52767983
M4182	2B	154255733	0.097789268	0.350515464	99	-0.014777005	0.01643699	0.053076126	-50.08133684
M579	1A	565296725	0.097816373	0.422680412	99	-0.014777005	0.016431869	0.056479461	-56.70985831
M136	1A	20866783	0.097928291	0.443298969	99	-0.014777005	0.016410742	0.05550482	54.76951097
M4139	2B	389136726	0.097938974	0.360824742	99	-0.014777005	0.016408727	0.078063094	108.3350513
M9418	4A	740144144	0.097945178	0.412371134	99	-0.014777005	0.016407557	0.070189077	-87.58233738
M9549	4B	29303212	0.098181637	0.371134021	99	-0.014777005	0.016363017	0.076903021	105.1391054
M1081	1B	85287651	0.098462836	0.175257732	99	-0.014777005	0.016310203	0.061396324	-67.01348724
M2445	2A	20323654	0.098484898	0.463917526	99	-0.014777005	0.016306067	0.07037377	-88.04386697
M14575	7A	82950722	0.098565282	0.474226804	99	-0.014777005	0.016291004	0.057469259	-58.71494658
M4601	2B	551450193	0.098570182	0.206185567	99	-0.014777005	0.016290086	0.05524707	54.26202302
M3604	2B	162967131	0.098579631	0.268041237	99	-0.014777005	0.016288317	0.059589723	63.12773532
M679	1A	590967815	0.098651189	0.360824742	99	-0.014777005	0.016274921	0.076347034	103.6243487
M6476	3A	595935042	0.098653751	0.082474227	99	-0.014777005	0.016274442	0.066681419	79.04731729
M6495	3A	625237502	0.098653751	0.082474227	99	-0.014777005	0.016274442	0.066681419	79.04731729
M13135	6B	55677178	0.098680105	0.216494845	99	-0.014777005	0.016269512	0.057329124	58.42895011
M9865	5A	18572611	0.098688737	0.175257732	99	-0.014777005	0.016267897	0.063156367	70.91069781
M15231	7B	41333729	0.098743532	0.309278351	99	-0.014777005	0.016257651	0.056596913	56.94596542
M10944	5B	576920050	0.098938736	0.412371134	99	-0.014777005	0.016221202	0.059408548	62.74445536
M1394	1B	526750495	0.099092328	0.020618557	99	-0.014777005	0.01619258	0.088815691	140.2351446
M2814	2A	275909182	0.099136974	0.12371134	99	-0.014777005	0.016184269	0.062333435	-69.07479413
M9754	4D	80836783	0.099157117	0.402061856	99	-0.014777005	0.016180521	0.079181784	-111.4623093
M7740	3B	689167710	0.099206637	0.082474227	99	-0.014777005	0.016171309	0.069054932	-84.77481994
M6694	3A	712196780	0.099317668	0.474226804	99	-0.014777005	0.016150675	0.051982611	-48.03896638
M6750	3A	0	0.099424591	0.257731959	99	-0.014777005	0.016130828	0.055466015	-54.69295588
M14486	7A	13379407	0.099439851	0.350515464	99	-0.014777005	0.016127998	0.089967714	143.8967048
M6310	3A	0	0.09951265	0.18556701	99	-0.014777005	0.016114501	0.060772553	65.65872393
M7997	3B	39655443	0.099583849	0.237113402	99	-0.014777005	0.016101311	0.063624088	71.96488194
M12370	6A	37394584	0.099715202	0.371134021	99	-0.014777005	0.016077006	0.054909137	-53.60023639
M3252	2A	759751315	0.099816221	0.154639175	99	-0.014777005	0.016058337	0.057417342	-58.60890859
M3145	2A	755740514	0.100035211	0.391752577	99	-0.014777005	0.016017939	0.057595394	58.97296732
M12000	5D	555036729	0.100097407	0.154639175	99	-0.014777005	0.016006483	0.059718675	-63.40124623
M12428	6A	0	0.100204552	0.360824742	99	-0.014777005	0.015986767	0.083577279	-124.1806491
M6348	3A	478681812	0.10020876	0.381443299	99	-0.014777005	0.015985994	0.054405513	-52.62150904
M7511	3B	422916679	0.100226632	0.391752577	99	-0.014777005	0.015982707	0.056942578	57.64368336
M15590	7B	648660809	0.100227913	0.092783505	99	-0.014777005	0.015982472	0.069626236	-86.18333728
M2682	2A	9016220	0.100251858	0.144329897	99	-0.014777005	0.01597807	0.077586305	107.0157287
M8493	3D	597052081	0.10027538	0.164948454	99	-0.014777005	0.015973747	0.064639429	-74.2801018
M11024	5B	494739791	0.100408028	0.18556701	99	-0.014777005	0.01594939	0.061111265	-66.39265352
M5500	2D	74936166	0.100428438	0.360824742	99	-0.014777005	0.015945645	0.056004574	55.76021804
M1469	1B	42142948	0.100486014	0.082474227	99	-0.014777005	0.015935086	0.065137903	-75.43015781
M11178	5B	0	0.100513278	0.113402062	99	-0.014777005	0.015930088	0.062651361	-69.78120867
M7675	3B	154191322	0.100524319	0.453608247	99	-0.014777005	0.015928065	0.061604468	67.46863113
M13886	6D	6944619	0.100640228	0.154639175	99	-0.014777005	0.015906838	0.06170108	67.68041437
M14474	7A	49648308	0.100683376	0.12371134	99	-0.014777005	0.015898943	0.071501159	90.88739089
M784	1B	530442292	0.10076704	0.041237113	99	-0.014777005	0.015883645	0.07893577	-110.7707689
M4592	2B	655520301	0.100833488	0.360824742	99	-0.014777005	0.015871505	0.053402024	-50.69824336
M10303	5A	727382944	0.100886657	0.154639175	99	-0.014777005	0.015861797	0.065594071	-76.49035024
M1958	1B	0	0.1009423	0.350515464	99	-0.014777005	0.015851644	0.060190733	-64.40754477
M6863	3A	0	0.101028784	0.391752577	99	-0.014777005	0.015835876	0.071671375	-91.32063957
M6835	3A	33345150	0.101028784	0.391752577	99	-0.014777005	0.015835876	0.071671375	91.32063957
M7360	3B	143666791	0.101100526	0.216494845	99	-0.014777005	0.015822807	0.057350971	-58.47349118
M1340	1B	370842543	0.101120866	0.484536082	99	-0.014777005	0.015819104	0.05141583	46.99711303
M412	1A	509033606	0.101152923	0.072164948	99	-0.014777005	0.015813268	0.066655558	-78.98601565
M8005	3B	0	0.10119897	0.072164948	99	-0.014777005	0.01580489	0.067175009	80.22189906
M734	1B	0	0.101449153	0.206185567	99	-0.014777005	0.015759445	0.060351238	-64.75150087
M987	1B	577431009	0.101566251	0.195876289	99	-0.014777005	0.015738217	0.055670013	-55.09600585
M5271	2B	384628356	0.101603521	0.134020619	99	-0.014777005	0.015731466	0.061139581	66.45419334
M9638	4B	657180139	0.101664378	0.463917526	99	-0.014777005	0.015720449	0.057879187	59.55556069
M2282	1D	494063368	0.10171101	0.432989691	99	-0.014777005	0.015712012	0.062659973	-69.80039442
M11928	5D	494878765	0.101752079	0.381443299	99	-0.014777005	0.015704585	0.052043754	48.15204215
M2106	1D	272756814	0.101808973	0.412371134	99	-0.014777005	0.015694302	0.059906899	-63.80153965
M10047	5A	475372989	0.101872171	0.391752577	99	-0.014777005	0.015682887	0.059637409	63.22881036
M2713	2A	133353425	0.102017478	0.463917526	99	-0.014777005	0.01565667	0.072109867	-92.44147317
M9954	5A	78242526	0.102045608	0.226804124	99	-0.014777005	0.0156516	0.055884588	-55.52155079
M627	1A	577986626	0.102103017	0.298969072	99	-0.014777005	0.015641257	0.05415757	52.14297626
M1014	1B	4821459	0.102142589	0.051546392	99	-0.014777005	0.015634131	0.074303121	98.15028856
M6456	3A	569891580	0.102182899	0.195876289	99	-0.014777005	0.015626876	0.061619285	-67.50108953
M11837	5B	703289576	0.102191984	0.288659794	99	-0.014777005	0.015625241	0.059604581	63.15921995
M13430	6B	515186463	0.102249711	0.164948454	99	-0.014777005	0.015614857	0.060043752	64.09337243
M12800	6A	599927110	0.102366975	0.402061856	99	-0.014777005	0.015593784	0.056950185	-57.65908643
M14627	7A	124069487	0.102387845	0.484536082	99	-0.014777005	0.015590036	0.064997046	-75.10428534
M475	1A	540664662	0.102394298	0.474226804	99	-0.014777005	0.015588877	0.061650706	67.56994799
M4424	2B	544170551	0.102404376	0.051546392	99	-0.014777005	0.015587068	0.074226378	-97.94764824
M14521	7A	56203202	0.102553762	0.474226804	99	-0.014777005	0.015560272	0.057153657	58.07183027
M6484	3A	598916422	0.102622235	0.350515464	99	-0.014777005	0.015548004	0.057206504	-58.17927302
M14136	7A	4013265	0.102640861	0.484536082	99	-0.014777005	0.015544669	0.051030689	-46.29566595
M1551	1B	581199944	0.102679592	0.113402062	99	-0.014777005	0.015537735	0.063557764	71.81492124
M427	1A	514770962	0.102692003	0.268041237	99	-0.014777005	0.015535513	0.058724014	-61.30684032
M9027	4A	49368188	0.102805675	0.391752577	99	-0.014777005	0.015515183	0.072589375	-93.67497504
M13100	6B	26841451	0.102866562	0.12371134	99	-0.014777005	0.015504304	0.060401415	64.85921738
M10924	5B	769502023	0.10288374	0.12371134	99	-0.014777005	0.015501236	0.060619447	65.32830954
M13690	6B	708010088	0.10306057	0.175257732	99	-0.014777005	0.015469685	0.059845668	63.67118246
M5463	2D	61772523	0.103091989	0.494845361	99	-0.014777005	0.015464086	0.061076906	-66.31801779
M10988	5B	476806091	0.103169812	0.371134021	99	-0.014777005	0.015450224	0.069835003	86.70093709
M1324	1B	30723633	0.103249559	0.134020619	99	-0.014777005	0.015436032	0.063199432	71.00743576
M12604	6A	532659325	0.103259108	0.103092784	99	-0.014777005	0.015434334	0.065011768	-75.1383104
M3443	2B	564075186	0.103365483	0.402061856	99	-0.014777005	0.015415424	0.051082512	46.38974235
M3875	2B	730608229	0.103393201	0.463917526	99	-0.014777005	0.0154105	0.05909383	-62.08143483
M3678	2B	38442340	0.103568767	0.474226804	99	-0.014777005	0.015379347	0.049892687	44.25386976
M10590	5B	576692587	0.103713039	0.360824742	99	-0.014777005	0.01535379	0.062854772	-70.23506344
M7992	3B	816555648	0.103733761	0.329896907	99	-0.014777005	0.015350123	0.055215756	-54.2005273
M7769	3B	710167838	0.103763693	0.103092784	99	-0.014777005	0.015344827	0.06245373	69.34166098
M1619	1B	603262258	0.103805039	0.494845361	99	-0.014777005	0.015337514	0.059345058	62.61041721
M1303	1B	399336171	0.103857899	0.103092784	99	-0.014777005	0.01532817	0.06112348	66.41919671
M6799	3A	729897788	0.103891912	0.051546392	99	-0.014777005	0.01532216	0.072657955	93.85206027
M11922	5D	363181276	0.103935966	0.041237113	99	-0.014777005	0.015314379	0.077322379	-106.2888939
M10	1A	0	0.103967857	0.154639175	99	-0.014777005	0.015308748	0.060209013	-64.44667145
M12143	6A	6562899	0.104162929	0.175257732	99	-0.014777005	0.01527435	0.059698624	63.35867868
M691	1A	491632757	0.104268656	0.391752577	99	-0.014777005	0.015255736	0.055331899	54.42878382
M12890	6A	467313559	0.104344933	0.298969072	99	-0.014777005	0.015242321	0.057998454	-59.80125659
M5902	2D	606129207	0.104389289	0.463917526	99	-0.014777005	0.015234524	0.060461298	-64.98788639
M10438	5A	591433518	0.104415598	0.340206186	99	-0.014777005	0.015229902	0.109739172	-214.0921949
M11247	5B	513202029	0.104415598	0.340206186	99	-0.014777005	0.015229902	0.109739172	-214.0921949
M13895	6D	7886166	0.104415598	0.340206186	99	-0.014777005	0.015229902	0.109739172	-214.0921949
M5063	2B	367190446	0.104415598	0.340206186	99	-0.014777005	0.015229902	0.109739172	-214.0921949
M5330	2B	124709688	0.104415598	0.340206186	99	-0.014777005	0.015229902	0.109739172	-214.0921949
M5363	2D	9629424	0.104415598	0.340206186	99	-0.014777005	0.015229902	0.109739172	-214.0921949
M7837	3B	441570426	0.104415598	0.340206186	99	-0.014777005	0.015229902	0.109739172	-214.0921949
M8869	4A	542592144	0.104415598	0.340206186	99	-0.014777005	0.015229902	0.109739172	-214.0921949
M9481	4B	65601308	0.104415598	0.340206186	99	-0.014777005	0.015229902	0.109739172	-214.0921949
M349	1A	490785150	0.104415598	0.340206186	99	-0.014777005	0.015229902	0.109739172	214.0921949
M5051	2B	766178940	0.104415598	0.340206186	99	-0.014777005	0.015229902	0.109739172	214.0921949
M9204	4A	716265884	0.104415598	0.340206186	99	-0.014777005	0.015229902	0.109739172	214.0921949
M995	1B	344338837	0.104430202	0.319587629	99	-0.014777005	0.015227336	0.056624117	-57.0007215
M4689	2B	713880693	0.104477145	0.474226804	99	-0.014777005	0.015219093	0.058539221	60.92160686
M2837	2A	137932218	0.104604301	0.371134021	99	-0.014777005	0.015196784	0.054465324	-52.73727059
M5720	2D	0	0.104683389	0.494845361	99	-0.014777005	0.015182924	0.064081015	73.00224953
M7134	3B	23945411	0.104732617	0.24742268	99	-0.014777005	0.015174302	0.05749112	58.75962368
M6403	3A	512326769	0.104747053	0.360824742	99	-0.014777005	0.015171775	0.08103849	-116.7508784
M10108	5A	473093367	0.104797964	0.288659794	99	-0.014777005	0.015162865	0.063313893	-71.26487281
M3114	2A	747610057	0.104819924	0.24742268	99	-0.014777005	0.015159023	0.053242276	50.39537746
M10624	5B	470106533	0.104937892	0.453608247	99	-0.014777005	0.015138401	0.057438754	58.65263011
M3279	2A	766594412	0.105052219	0.278350515	99	-0.014777005	0.015118439	0.054208681	-52.24144143
M3872	2B	106962921	0.105153863	0.103092784	99	-0.014777005	0.015100713	0.065500834	76.27305372
M2813	2A	275909182	0.105272474	0.432989691	99	-0.014777005	0.015080051	0.065444579	76.14209559
M4292	2B	143000173	0.105419701	0.484536082	99	-0.014777005	0.015054441	0.057784412	-59.36068072
M6366	3A	390075139	0.105483341	0.484536082	99	-0.014777005	0.015043383	0.050936325	46.12460783
M2317	1D	487954965	0.105643341	0.24742268	99	-0.014777005	0.015015614	0.058621495	-61.09297108
M5028	2B	758922449	0.105655129	0.422680412	99	-0.014777005	0.01501357	0.063617421	71.94980016
M1600	1B	536709124	0.105655925	0.329896907	99	-0.014777005	0.015013432	0.056881542	-57.52017425
M14061	6D	450169167	0.105670019	0.12371134	99	-0.014777005	0.015010989	0.059125609	-62.1482243
M1618	1B	628627682	0.105698813	0.474226804	99	-0.014777005	0.015005998	0.05570849	55.17219289
M6473	3A	595935042	0.105821613	0.06185567	99	-0.014777005	0.01498473	0.069035341	-84.72672632
M12958	6B	732212	0.105830878	0.082474227	99	-0.014777005	0.014983126	0.066871193	-79.49789168
M6914	3B	3064404	0.105844239	0.298969072	99	-0.014777005	0.014980814	0.062139572	68.64580209
M9314	4A	730004142	0.105860637	0.474226804	99	-0.014777005	0.014977977	0.058327838	60.48242916
M9322	4A	730754928	0.105945484	0.206185567	99	-0.014777005	0.014963304	0.056156669	56.06349322
M13998	6D	134699294	0.105966771	0.309278351	99	-0.014777005	0.014959625	0.061191644	-66.56741799
M3890	2B	110963593	0.105992745	0.18556701	99	-0.014777005	0.014955137	0.058268705	60.35985644
M10472	5A	611631186	0.106162689	0.175257732	99	-0.014777005	0.014925802	0.061376377	-66.96994964
M2036	1D	21254198	0.106200753	0.412371134	99	-0.014777005	0.014919239	0.055323304	-54.41187417
M9420	4A	739759017	0.106295341	0.134020619	99	-0.014777005	0.01490294	0.064949841	74.99523304
M1548	1B	0	0.106299713	0.06185567	99	-0.014777005	0.014902188	0.06776352	-81.63368359
M3647	2B	46670271	0.106702667	0.443298969	99	-0.014777005	0.01483294	0.059464469	-62.86263195
M11180	5B	0	0.106761554	0.340206186	99	-0.014777005	0.014822844	0.080567444	-115.3975642
M8286	3D	9312378	0.10689996	0.360824742	99	-0.014777005	0.014799141	0.079439403	-112.1887787
M12666	6A	194187915	0.106900016	0.391752577	99	-0.014777005	0.014799131	0.052230325	-48.49789866
M14826	7A	644848734	0.107010758	0.144329897	99	-0.014777005	0.01478019	0.059551518	-63.04681463
M15514	7B	611339700	0.107033044	0.494845361	99	-0.014777005	0.014776381	0.062151671	68.67253653
M11638	5B	598146738	0.107081533	0.371134021	99	-0.014777005	0.014768097	0.05324198	50.39481602
M1078	1B	484923519	0.107229163	0.484536082	99	-0.014777005	0.014742899	0.063857813	72.49458275
M10190	5A	503430449	0.107229403	0.237113402	99	-0.014777005	0.014742858	0.054652905	53.10115513
M8788	4A	599469214	0.107431876	0.381443299	99	-0.014777005	0.014708363	0.05319468	-50.3053144
M11795	5B	625779199	0.107456614	0.051546392	99	-0.014777005	0.014704153	0.072344304	93.04352455
M9388	4A	739874789	0.107556201	0.113402062	99	-0.014777005	0.014687217	0.063428458	71.52300973
M11594	5B	586531672	0.107559962	0.206185567	99	-0.014777005	0.014686578	0.053857465	51.56669352
M1586	1B	573040772	0.107598319	0.24742268	99	-0.014777005	0.01468006	0.057629177	-59.04216969
M3187	2A	97002725	0.107663136	0.350515464	99	-0.014777005	0.014669051	0.094172041	-157.6599683
M3211	2A	759463295	0.107663136	0.350515464	99	-0.014777005	0.014669051	0.094172041	-157.6599683
M5270	2B	800955579	0.107663136	0.350515464	99	-0.014777005	0.014669051	0.094172041	-157.6599683
M5286	2B	767327932	0.107663136	0.350515464	99	-0.014777005	0.014669051	0.094172041	-157.6599683
M5313	2B	641868694	0.107663136	0.350515464	99	-0.014777005	0.014669051	0.094172041	-157.6599683
M3226	2A	726714473	0.107663136	0.350515464	99	-0.014777005	0.014669051	0.094172041	157.6599683
M3259	2A	0	0.107663136	0.350515464	99	-0.014777005	0.014669051	0.094172041	157.6599683
M5298	2B	797110790	0.107663136	0.350515464	99	-0.014777005	0.014669051	0.094172041	157.6599683
M5361	2D	55920605	0.107663136	0.350515464	99	-0.014777005	0.014669051	0.094172041	157.6599683
M7836	3B	441570426	0.107663136	0.350515464	99	-0.014777005	0.014669051	0.094172041	157.6599683
M8162	3B	817331152	0.107666794	0.453608247	99	-0.014777005	0.01466843	0.052465728	48.93604733
M12433	6A	61874990	0.107691414	0.082474227	99	-0.014777005	0.014664251	0.072327693	-93.00080239
M15397	7B	522729143	0.107713529	0.432989691	99	-0.014777005	0.014660498	0.057400429	58.57438608
M5708	2D	589246120	0.107766649	0.288659794	99	-0.014777005	0.014651486	0.064570916	74.12272315
M8568	4A	47737658	0.107873661	0.371134021	99	-0.014777005	0.014633347	0.068013058	82.23601967
M9399	4A	5381823	0.107935784	0.391752577	99	-0.014777005	0.014622825	0.054158436	-52.14464432
M901	1B	148477798	0.107975552	0.051546392	99	-0.014777005	0.014616094	0.07214557	-92.53303693
M5865	2D	601604653	0.108035411	0.360824742	99	-0.014777005	0.014605967	0.059443914	62.81918149
M13565	6B	438806491	0.108195318	0.432989691	99	-0.014777005	0.014578944	0.051857835	47.80862353
M5262	2B	765884956	0.108211397	0.24742268	99	-0.014777005	0.014576229	0.05712327	-58.01009759
M3627	2B	419250140	0.108214387	0.402061856	99	-0.014777005	0.014575724	0.073000473	94.73900486
M5620	2D	561930556	0.108344305	0.453608247	99	-0.014777005	0.014553806	0.060376052	64.80475808
M8555	4A	137524931	0.108445209	0.494845361	99	-0.014777005	0.014536803	0.060452685	64.96937058
M9804	4D	675631336	0.108499842	0.18556701	99	-0.014777005	0.014527605	0.057535911	-58.85121881
M9582	4B	555219147	0.108542844	0.216494845	99	-0.014777005	0.014520368	0.059692725	-63.34615931
M13028	6B	21092440	0.108558962	0.072164948	99	-0.014777005	0.014517656	0.073006268	94.75404803
M5397	2D	15630222	0.108568164	0.309278351	99	-0.014777005	0.014516109	0.057421827	-58.61806707
M1594	1B	587138312	0.108583668	0.453608247	99	-0.014777005	0.014513501	0.052618279	-49.22103593
M8622	4A	127984307	0.108584964	0.474226804	99	-0.014777005	0.014513283	0.058582503	-61.01172726
M3151	2A	0	0.108661121	0.360824742	99	-0.014777005	0.01450048	0.051227426	46.65331939
M9450	4B	18450356	0.108775653	0.257731959	99	-0.014777005	0.014481245	0.057745006	59.27974645
M8074	3B	790541416	0.108797617	0.360824742	99	-0.014777005	0.014477559	0.054666114	-53.12682678
M8828	4A	138660384	0.108801168	0.12371134	99	-0.014777005	0.014476963	0.062411378	-69.24764667
M8572	4A	45872485	0.108814053	0.278350515	99	-0.014777005	0.014474801	0.058285738	-60.39515136
M15203	7B	55840771	0.108966114	0.24742268	99	-0.014777005	0.014449308	0.053271727	-50.45114404
M12713	6A	583292509	0.109108598	0.494845361	99	-0.014777005	0.014425456	0.055875578	-55.50364751
M2192	1D	13863738	0.10922903	0.494845361	99	-0.014777005	0.014405324	0.073508639	96.06257916
M10839	5B	454180549	0.109299155	0.391752577	99	-0.014777005	0.014393612	0.071287606	90.34529286
M7516	3B	74352754	0.109362916	0.164948454	99	-0.014777005	0.01438297	0.061061116	-66.28373157
M105	1A	16914186	0.109486638	0.298969072	99	-0.014777005	0.014362342	0.050442693	-45.2349381
M6820	3A	727518767	0.109547457	0.092783505	99	-0.014777005	0.01435221	0.061842463	-67.99093659
M7541	3B	492105153	0.109645269	0.412371134	99	-0.014777005	0.01433593	0.05048658	45.31368433
M1409	1B	512275631	0.1097291	0.360824742	99	-0.014777005	0.01432199	0.05215327	-48.35490778
M2822	2A	477627488	0.109790578	0.402061856	99	-0.014777005	0.014311774	0.068153477	-82.57593654
M6396	3A	473708936	0.110043145	0.484536082	99	-0.014777005	0.014269873	0.059366365	62.65538218
M6210	3A	577683980	0.110119636	0.082474227	99	-0.014777005	0.014257204	0.063412836	-71.48778238
M12233	6A	0	0.110215326	0.402061856	99	-0.014777005	0.014241369	0.065809296	76.99312792
M4625	2B	599925082	0.110289237	0.453608247	99	-0.014777005	0.014229149	0.06128355	-66.76752819
M13232	6B	153547588	0.110531572	0.18556701	99	-0.014777005	0.014189146	0.055895404	-55.54304416
M7762	3B	103111486	0.110687518	0.175257732	99	-0.014777005	0.014163455	0.05593328	55.61834381
M6975	3B	9094032	0.110717556	0.350515464	99	-0.014777005	0.014158511	0.054354514	-52.52290201
M8607	4A	63826057	0.110734972	0.278350515	99	-0.014777005	0.014155645	0.055346825	-54.45815213
M8189	3B	0	0.110764312	0.164948454	99	-0.014777005	0.014150818	0.058213406	60.2453449
M7534	3B	488191801	0.110798706	0.350515464	99	-0.014777005	0.014145162	0.06506825	-75.26892825
M6785	3A	595019227	0.110950868	0.402061856	99	-0.014777005	0.014120162	0.063664024	72.05525261
M1204	1B	116830677	0.110993861	0.237113402	99	-0.014777005	0.014113105	0.059288534	-62.49120449
M15335	7B	229832873	0.111035758	0.144329897	99	-0.014777005	0.014106231	0.0596914	-63.34334604
M618	1A	578933488	0.111042288	0.216494845	99	-0.014777005	0.01410516	0.054627254	53.05132187
M671	1A	589055554	0.111077613	0.371134021	99	-0.014777005	0.014099366	0.055662793	-55.08171674
M4757	2B	0	0.111090496	0.360824742	99	-0.014777005	0.014097254	0.052861585	49.67728319
M6875	3A	749184747	0.111125161	0.381443299	99	-0.014777005	0.014091572	0.07279892	-94.21658257
M1263	1B	418051065	0.111158193	0.350515464	99	-0.014777005	0.014086159	0.058344778	-60.51756705
M1632	1B	587501291	0.111194716	0.206185567	99	-0.014777005	0.014080177	0.054539355	52.88073319
M2924	2A	691480240	0.111201126	0.144329897	99	-0.014777005	0.014079127	0.058614881	-61.07918749
M6430	3A	517095336	0.111281921	0.103092784	99	-0.014777005	0.014065901	0.073725093	-96.62914491
M12596	6A	550966287	0.111320646	0.12371134	99	-0.014777005	0.014059566	0.062082323	-68.51937386
M14407	7A	31106605	0.111513952	0.494845361	99	-0.014777005	0.014027978	0.066853678	-79.45625455
M14405	7A	31432978	0.111513952	0.494845361	99	-0.014777005	0.014027978	0.066853678	79.45625455
M14225	7A	8530345	0.111587777	0.412371134	99	-0.014777005	0.014015931	0.054976575	-53.73197794
M12582	6A	525799703	0.111804514	0.350515464	99	-0.014777005	0.013980613	0.053564859	51.00789504
M4693	2B	723159590	0.111840558	0.371134021	99	-0.014777005	0.013974747	0.056559034	56.86976629
M8556	4A	137524931	0.111965887	0.237113402	99	-0.014777005	0.013954367	0.054073258	51.98075108
M10290	5A	0	0.112049036	0.195876289	99	-0.014777005	0.01394086	0.056469067	-56.68898683
M11676	5B	498302382	0.112078352	0.391752577	99	-0.014777005	0.013936101	0.065676176	76.68195767
M8169	3B	815282731	0.112079723	0.443298969	99	-0.014777005	0.013935878	0.056518185	-56.78764859
M12040	6A	49592914	0.112084677	0.164948454	99	-0.014777005	0.013935074	0.05923739	-62.38343752
M371	1A	499864136	0.112242252	0.422680412	99	-0.014777005	0.013909517	0.051060996	46.35067164
M3085	2A	606133132	0.112268141	0.494845361	99	-0.014777005	0.013905321	0.060405307	-64.86757603
M15264	7B	132741570	0.112299205	0.484536082	99	-0.014777005	0.013900289	0.051759139	47.62681691
M11469	5B	159873308	0.112326971	0.12371134	99	-0.014777005	0.013895792	0.059549343	-63.04220865
M13769	6B	719883685	0.112340319	0.278350515	99	-0.014777005	0.013893631	0.054520971	52.84508913
M4442	2B	640489568	0.112354465	0.371134021	99	-0.014777005	0.013891341	0.074227193	97.94979832
M10867	5B	14901284	0.112355178	0.319587629	99	-0.014777005	0.013891225	0.057105372	57.9737513
M3593	2B	506395762	0.112430543	0.432989691	99	-0.014777005	0.01387903	0.049348837	-43.29436013
M5174	2B	0	0.112600195	0.288659794	99	-0.014777005	0.01385161	0.051192718	-46.59012295
M12250	6A	16598099	0.112634046	0.154639175	99	-0.014777005	0.013846144	0.059730787	63.42696705
M11147	5B	529048297	0.112837052	0.257731959	99	-0.014777005	0.013813405	0.05441285	-52.63570225
M1997	1D	11496996	0.11283736	0.329896907	99	-0.014777005	0.013813356	0.057104184	-57.97133845
M442	1A	531561531	0.112887206	0.288659794	99	-0.014777005	0.013805327	0.053835977	-51.52555344
M588	1A	398246596	0.112954498	0.18556701	99	-0.014777005	0.013794495	0.059891975	63.76975408
M13503	6B	634330557	0.112955586	0.391752577	99	-0.014777005	0.01379432	0.054075783	-51.98560502
M1883	1B	480971976	0.11297641	0.443298969	99	-0.014777005	0.013790969	0.063863052	-72.50647908
M264	1A	293594017	0.11298841	0.06185567	99	-0.014777005	0.013789038	0.069054492	84.7737397
M9733	4D	16502547	0.113002952	0.288659794	99	-0.014777005	0.013786699	0.051461032	47.07978399
M9331	4A	732349694	0.113142443	0.422680412	99	-0.014777005	0.013764279	0.075624988	-101.6735787
M902	1B	148477798	0.113198663	0.041237113	99	-0.014777005	0.013755251	0.075785561	102.1057991
M1354	1B	156837503	0.113203739	0.092783505	99	-0.014777005	0.013754436	0.063641777	72.00490382
M2737	2A	628368389	0.113223949	0.402061856	99	-0.014777005	0.013751192	0.05596062	-55.67272883
M9792	4D	465185311	0.11339208	0.237113402	99	-0.014777005	0.013724231	0.0557917	55.33713343
M9295	4A	312603570	0.113402671	0.474226804	99	-0.014777005	0.013722534	0.048713058	-42.18599165
M5826	2D	588434693	0.113516505	0.443298969	99	-0.014777005	0.013704307	0.063476658	-71.63175419
M15204	7B	55840771	0.113644526	0.463917526	99	-0.014777005	0.013683833	0.05858228	-61.01126264
M10884	5B	520209151	0.113789681	0.309278351	99	-0.014777005	0.013660649	0.055392713	-54.54849168
M12130	6A	610761	0.11379976	0.24742268	99	-0.014777005	0.013659041	0.056562156	56.87604488
M7972	3B	146553872	0.113893104	0.494845361	99	-0.014777005	0.013644151	0.054879982	53.54333252
M9748	4D	65113876	0.114034054	0.309278351	99	-0.014777005	0.013621694	0.066298464	78.14197889
M6962	3B	7019221	0.114063306	0.12371134	99	-0.014777005	0.013617038	0.064744286	-74.52129125
M1963	1D	7734813	0.114094698	0.350515464	99	-0.014777005	0.013612042	0.061410644	67.04474993
M12496	6A	317631893	0.11412707	0.206185567	99	-0.014777005	0.013606891	0.055155904	-54.08308976
M2462	2A	448401210	0.1141554	0.175257732	99	-0.014777005	0.013602386	0.075010708	-100.0285578
M9012	4A	77494178	0.11416588	0.350515464	99	-0.014777005	0.013600719	0.088161658	-138.1773841
M14509	7A	56245466	0.114188928	0.463917526	99	-0.014777005	0.013597055	0.056557086	56.86584757
M5226	2B	643330937	0.114213432	0.164948454	99	-0.014777005	0.01359316	0.067892939	-81.94579797
M15222	7B	36484341	0.11422748	0.257731959	99	-0.014777005	0.013590927	0.053948541	-51.74124506
M761	1B	25945971	0.114388102	0.443298969	99	-0.014777005	0.013565422	0.05228203	-48.59396735
M3580	2B	40893976	0.114509311	0.24742268	99	-0.014777005	0.013546202	0.056758536	-57.27166988
M5666	2D	0	0.11454973	0.494845361	99	-0.014777005	0.013539798	0.053466766	50.82124498
M15099	7A	720585870	0.114577836	0.164948454	99	-0.014777005	0.013535346	0.062393653	69.20831943
M8063	3B	748377632	0.11458393	0.432989691	99	-0.014777005	0.013534381	0.065560547	-76.41218319
M11260	5B	635769576	0.114711623	0.041237113	99	-0.014777005	0.013514172	0.07492424	99.79807655
M5204	2B	124972475	0.114831644	0.113402062	99	-0.014777005	0.0134952	0.060901005	65.93657521
M1333	1B	470907649	0.114881734	0.360824742	99	-0.014777005	0.013487289	0.065224371	-75.63055346
M3544	2B	28014544	0.114918862	0.309278351	99	-0.014777005	0.013481427	0.065656636	76.63633529
M11349	5B	437988379	0.115164261	0.154639175	99	-0.014777005	0.013442739	0.068821081	-84.20162106
M2153	1D	418529908	0.115291633	0.371134021	99	-0.014777005	0.013422695	0.051178883	-46.56494271
M158	1A	748472420	0.115366041	0.381443299	99	-0.014777005	0.013410997	0.055653318	55.06296535
M6195	3A	22831857	0.115502602	0.082474227	99	-0.014777005	0.013389549	0.064702817	-74.42585727
M9157	4A	0	0.115580154	0.195876289	99	-0.014777005	0.013377382	0.059215943	-62.33827325
M7867	3B	423975549	0.115596356	0.371134021	99	-0.014777005	0.013374841	0.076108075	102.9766944
M7991	3B	816555648	0.115618769	0.309278351	99	-0.014777005	0.013371327	0.056626914	-57.00635374
M9055	4A	687327397	0.115702849	0.391752577	99	-0.014777005	0.013358151	0.0802023	-114.3539371
M642	1A	580452752	0.115714154	0.329896907	99	-0.014777005	0.01335638	0.05057103	45.46540629
M7548	3B	498344378	0.115734994	0.030927835	99	-0.014777005	0.013353117	0.078522173	-109.6130083
M7338	3B	0	0.115736212	0.463917526	99	-0.014777005	0.013352926	0.055917112	55.58619358
M2389	2A	24002743	0.115816132	0.412371134	99	-0.014777005	0.013340416	0.06133972	66.88997723
M14619	7A	116005684	0.115941164	0.329896907	99	-0.014777005	0.013320863	0.05420961	52.24323138
M2568	2A	59120189	0.116133706	0.412371134	99	-0.014777005	0.0132908	0.051683271	47.487297
M8789	4A	597076028	0.116210622	0.226804124	99	-0.014777005	0.013278806	0.051844905	-47.78478525
M11931	5D	424046570	0.116225855	0.371134021	99	-0.014777005	0.013276432	0.077961063	-108.052042
M4194	2B	674740371	0.11625387	0.144329897	99	-0.014777005	0.013272066	0.061719347	-67.72049487
M4027	2B	392038009	0.116444562	0.360824742	99	-0.014777005	0.013242381	0.063412963	71.48806927
M14539	7A	65604949	0.116562926	0.360824742	99	-0.014777005	0.013223983	0.081398689	-117.7910509
M2281	1D	494063368	0.11660417	0.360824742	99	-0.014777005	0.013217577	0.079675433	-112.8564369
M2289	1D	589475153	0.11660417	0.360824742	99	-0.014777005	0.013217577	0.079675433	-112.8564369
M2047	1D	10650564	0.116742774	0.268041237	99	-0.014777005	0.013196068	0.064683983	74.38253596
M13185	6B	0	0.116849559	0.463917526	99	-0.014777005	0.013179516	0.059932218	63.85547973
M9119	4A	25288905	0.116867721	0.371134021	99	-0.014777005	0.013176703	0.077069758	-105.5955126
M12372	6A	305511739	0.117003371	0.154639175	99	-0.014777005	0.013155705	0.059093734	-62.08123312
M4381	2B	544259861	0.117017424	0.484536082	99	-0.014777005	0.013153531	0.051485887	-47.12527175
M15568	7B	672025248	0.117065268	0.154639175	99	-0.014777005	0.013146133	0.055038621	-53.85333038
M5619	2D	561930556	0.117066799	0.206185567	99	-0.014777005	0.013145896	0.058908187	-61.69199036
M7408	3B	73443935	0.117253467	0.113402062	99	-0.014777005	0.013117063	0.061685836	67.64697536
M10963	5B	567730502	0.117316631	0.391752577	99	-0.014777005	0.013107318	0.058408734	60.65031467
M142	1A	159684705	0.117372629	0.18556701	99	-0.014777005	0.013098684	0.054809346	53.40558915
M10056	5A	473024901	0.117422203	0.350515464	99	-0.014777005	0.013091044	0.055173198	-54.11700853
M14471	7A	263797478	0.11746272	0.494845361	99	-0.014777005	0.013084803	0.058334723	-60.49670865
M385	1A	197865491	0.117508398	0.443298969	99	-0.014777005	0.013077769	0.051108307	46.43660456
M5138	2B	780857763	0.117637798	0.154639175	99	-0.014777005	0.013057861	0.05639146	56.53327611
M3209	2A	778811091	0.117657387	0.494845361	99	-0.014777005	0.013054849	0.060344701	-64.73747525
M1307	1B	578521082	0.117757733	0.484536082	99	-0.014777005	0.013039431	0.063552756	71.8036049
M3247	2A	757987598	0.11777809	0.319587629	99	-0.014777005	0.013036305	0.05133749	-46.85400738
M10828	5B	70736757	0.117846497	0.474226804	99	-0.014777005	0.013025804	0.060042179	-64.09001391
M3751	2B	408490253	0.117863558	0.329896907	99	-0.014777005	0.013023186	0.056137008	-56.02424344
M7375	3B	79421097	0.117927814	0.288659794	99	-0.014777005	0.013013331	0.052478905	-48.96063119
M2006	1D	495342360	0.118072498	0.309278351	99	-0.014777005	0.012991161	0.057448604	58.67274851
M6946	3B	685069835	0.118212729	0.360824742	99	-0.014777005	0.012969703	0.058659661	61.17254739
M468	1A	422061458	0.118312676	0.453608247	99	-0.014777005	0.012954427	0.056190624	-56.13131069
M5005	2B	0	0.118323376	0.154639175	99	-0.014777005	0.012952792	0.05706183	-57.88537602
M13203	6B	65496487	0.118345681	0.371134021	99	-0.014777005	0.012949385	0.077453792	-106.6504858
M9539	4B	551047829	0.118442376	0.340206186	99	-0.014777005	0.012934624	0.057325922	-58.4224232
M13276	6B	507595411	0.118511651	0.298969072	99	-0.014777005	0.012924058	0.055971248	-55.6938768
M11570	5B	685970589	0.118551247	0.164948454	99	-0.014777005	0.012918021	0.059176655	-62.25558177
M9813	4D	507006414	0.118697878	0.257731959	99	-0.014777005	0.012895686	0.058036343	59.87941507
M3198	2A	63536670	0.118857191	0.340206186	99	-0.014777005	0.012871454	0.057616928	-59.01707451
M2164	1D	426987465	0.119017798	0.402061856	99	-0.014777005	0.012847063	0.05724329	58.25412061
M3086	2A	606133132	0.11906157	0.195876289	99	-0.014777005	0.012840422	0.057863094	-59.52244703
M1349	1B	384300574	0.119079356	0.226804124	99	-0.014777005	0.012837724	0.056653314	57.05951924
M773	1B	89404769	0.11929894	0.195876289	99	-0.014777005	0.012804454	0.05709388	57.95042011
M12007	5D	553479783	0.119370377	0.391752577	99	-0.014777005	0.012793646	0.052470885	-48.94566736
M7059	3B	13505109	0.119375418	0.309278351	99	-0.014777005	0.012792883	0.087207107	135.2014129
M12132	6A	5480626	0.11940558	0.237113402	99	-0.014777005	0.012788322	0.056847619	-57.45158719
M6620	3A	686200851	0.11940737	0.18556701	99	-0.014777005	0.012788052	0.055940029	-55.63176518
M11741	5B	0	0.119461807	0.381443299	99	-0.014777005	0.012779823	0.071380169	-90.58006285
M12792	6A	599680412	0.119482476	0.329896907	99	-0.014777005	0.0127767	0.053827189	-51.50873299
M1801	1B	653681729	0.119493012	0.154639175	99	-0.014777005	0.012775108	0.056714963	-57.18376942
M10375	5A	572043684	0.119577151	0.216494845	99	-0.014777005	0.012762401	0.057405779	-58.58530692
M8015	3B	10930676	0.11976998	0.371134021	99	-0.014777005	0.012733319	0.076344431	-103.617282
M8018	3B	771630784	0.11976998	0.371134021	99	-0.014777005	0.012733319	0.076344431	-103.617282
M8078	3B	793010867	0.11976998	0.371134021	99	-0.014777005	0.012733319	0.076344431	-103.617282
M8086	3B	796453795	0.11976998	0.371134021	99	-0.014777005	0.012733319	0.076344431	-103.617282
M8083	3B	49383194	0.11976998	0.371134021	99	-0.014777005	0.012733319	0.076344431	103.617282
M6854	3A	745517190	0.119823565	0.412371134	99	-0.014777005	0.012725246	0.060507872	65.08804586
M10984	5B	476248249	0.119852625	0.422680412	99	-0.014777005	0.01272087	0.057437829	58.65074098
M6224	3A	25036353	0.119924753	0.216494845	99	-0.014777005	0.012710014	0.053749919	-51.3609554
M8156	3B	75766790	0.119937563	0.432989691	99	-0.014777005	0.012708086	0.055507699	54.77519446
M11615	5B	592839477	0.119944132	0.484536082	99	-0.014777005	0.012707098	0.058936531	61.75137137
M11726	5B	664683778	0.120017766	0.103092784	99	-0.014777005	0.012696024	0.060838564	65.80143719
M404	1A	508571576	0.120072188	0.402061856	99	-0.014777005	0.012687845	0.051540767	-47.22578897
M11588	5B	8998565	0.120133929	0.484536082	99	-0.014777005	0.012678571	0.058506486	60.85349196
M15362	7B	159301016	0.120152118	0.144329897	99	-0.014777005	0.012675839	0.060667054	-65.43095847
M10782	5B	410537310	0.120152118	0.144329897	99	-0.014777005	0.012675839	0.060667054	65.43095847
M163	1A	0	0.120154052	0.484536082	99	-0.014777005	0.012675549	0.050709803	-45.7152725
M6168	3A	19975582	0.120241992	0.340206186	99	-0.014777005	0.012662351	0.055604499	-54.9664064
M15241	7B	81639841	0.120270529	0.381443299	99	-0.014777005	0.01265807	0.052049981	48.16356543
M7464	3B	415924572	0.120308374	0.453608247	99	-0.014777005	0.012652395	0.051100734	46.42284541
M13557	6B	660491055	0.120341246	0.422680412	99	-0.014777005	0.012647468	0.061012126	66.17741373
M622	1A	478032314	0.120428371	0.340206186	99	-0.014777005	0.012634415	0.050017707	44.47592895
M2158	1D	521259456	0.120445545	0.278350515	99	-0.014777005	0.012631843	0.055200712	54.17099728
M11518	5B	715223883	0.120492929	0.494845361	99	-0.014777005	0.012624749	0.058463256	60.76359647
M3548	2B	0	0.120510321	0.474226804	99	-0.014777005	0.012622147	0.055965562	55.6825632
M3253	2A	759751315	0.120590155	0.391752577	99	-0.014777005	0.012610204	0.058881053	-61.63517148
M818	1B	21249692	0.120637565	0.134020619	99	-0.014777005	0.012603116	0.059085398	62.06372066
M3591	2B	33729356	0.120665701	0.443298969	99	-0.014777005	0.012598912	0.065060992	75.25213703
M15544	7B	92684193	0.120745996	0.474226804	99	-0.014777005	0.012586918	0.052223957	-48.48607433
M5458	2D	577330597	0.120782408	0.226804124	99	-0.014777005	0.012581482	0.054946264	-53.67274516
M14811	7A	634973919	0.120799234	0.453608247	99	-0.014777005	0.012578971	0.059925415	-63.84098487
M2394	2A	24002743	0.120878299	0.154639175	99	-0.014777005	0.012567175	0.07720216	-105.9586412
M2419	2A	11768354	0.120878299	0.154639175	99	-0.014777005	0.012567175	0.07720216	-105.9586412
M2401	2A	13475674	0.120878299	0.154639175	99	-0.014777005	0.012567175	0.07720216	105.9586412
M2489	2A	29263722	0.120878299	0.154639175	99	-0.014777005	0.012567175	0.07720216	105.9586412
M2722	2A	435472864	0.120878299	0.154639175	99	-0.014777005	0.012567175	0.07720216	105.9586412
M4568	2B	545270114	0.120901211	0.226804124	99	-0.014777005	0.012563759	0.051709778	47.53601985
M9563	4B	526967219	0.120916874	0.18556701	99	-0.014777005	0.012561424	0.059384485	62.69363586
M12347	6A	28413205	0.120952748	0.226804124	99	-0.014777005	0.012556076	0.055718109	-55.19124666
M3504	2B	24847422	0.121019454	0.484536082	99	-0.014777005	0.012546138	0.049789157	-44.0704019
M12263	6A	14388750	0.121094024	0.494845361	99	-0.014777005	0.012535036	0.058727833	61.31481644
M2061	1D	41581295	0.12125641	0.154639175	99	-0.014777005	0.012510886	0.078275177	-108.9245045
M2137	1D	15543975	0.12125641	0.154639175	99	-0.014777005	0.012510886	0.078275177	-108.9245045
M2412	2A	4637076	0.12125641	0.154639175	99	-0.014777005	0.012510886	0.078275177	-108.9245045
M2428	2A	21149223	0.12125641	0.154639175	99	-0.014777005	0.012510886	0.078275177	-108.9245045
M2424	2A	16730048	0.12125641	0.154639175	99	-0.014777005	0.012510886	0.078275177	108.9245045
M2466	2A	20237416	0.12125641	0.154639175	99	-0.014777005	0.012510886	0.078275177	108.9245045
M1191	1B	143362254	0.12127235	0.18556701	99	-0.014777005	0.012508517	0.055881202	-55.51482105
M4935	2B	752843256	0.121549517	0.443298969	99	-0.014777005	0.012467387	0.051455548	47.06975037
M2227	1D	545033351	0.121578008	0.020618557	99	-0.014777005	0.012463165	0.086558309	-133.1971695
M84	1A	14718514	0.121689394	0.463917526	99	-0.014777005	0.01244667	0.049240937	-43.10524191
M998	1B	41982366	0.12173781	0.154639175	99	-0.014777005	0.012439505	0.055815054	-55.38347169
M3354	2A	766445675	0.12178781	0.494845361	99	-0.014777005	0.01243211	0.049500237	43.56041691
M9684	4B	665957105	0.12195205	0.134020619	99	-0.014777005	0.012407841	0.059063682	62.01810772
M14408	7A	31106605	0.122244836	0.494845361	99	-0.014777005	0.012364668	0.067218895	80.32675258
M1597	1B	400016805	0.122297474	0.484536082	99	-0.014777005	0.012356918	0.051338944	46.85666164
M15064	7A	715784906	0.122317078	0.06185567	99	-0.014777005	0.012354033	0.070686087	88.82707432
M6407	3A	535727949	0.122346705	0.113402062	99	-0.014777005	0.012349674	0.070726863	88.92958614
M13074	6B	39341325	0.122360723	0.154639175	99	-0.014777005	0.012347612	0.058331101	60.48919652
M10706	5B	53795921	0.122421842	0.381443299	99	-0.014777005	0.012338624	0.055053448	-53.88234869
M8580	4A	54405419	0.122443908	0.041237113	99	-0.014777005	0.01233538	0.074318545	-98.19104109
M8581	4A	45140360	0.122443908	0.041237113	99	-0.014777005	0.01233538	0.074318545	98.19104109
M2002	1D	10935924	0.122489601	0.371134021	99	-0.014777005	0.012328665	0.05421439	52.25244616
M3032	2A	583234088	0.122501231	0.257731959	99	-0.014777005	0.012326956	0.050258106	44.90448433
M8340	3D	37969599	0.122512359	0.092783505	99	-0.014777005	0.012325322	0.061697979	-67.6736098
M3078	2A	736308932	0.122587721	0.484536082	99	-0.014777005	0.012314255	0.05023837	-44.86922269
M3168	2A	512149585	0.122658882	0.381443299	99	-0.014777005	0.012303813	0.054685147	-53.1638272
M1772	1B	43291466	0.122753272	0.422680412	99	-0.014777005	0.012289972	0.048707864	-42.1769965
M4804	2B	127668612	0.122819042	0.412371134	99	-0.014777005	0.012280335	0.053165189	-50.24955282
M13198	6B	0	0.122846239	0.082474227	99	-0.014777005	0.012276352	0.066139304	77.76724495
M14004	6D	97915028	0.122911104	0.360824742	99	-0.014777005	0.012266856	0.054309965	-52.43684052
M181	1A	344675281	0.122945343	0.412371134	99	-0.014777005	0.012261845	0.050858032	-45.98292251
M8388	3D	184366461	0.122986262	0.226804124	99	-0.014777005	0.012255859	0.057385595	-58.54411559
M7926	3B	552736382	0.122993703	0.072164948	99	-0.014777005	0.012254771	0.066388536	78.35444805
M8013	3B	513332084	0.123033441	0.360824742	99	-0.014777005	0.012248961	0.081459446	117.9669559
M3432	2B	172205833	0.123068391	0.072164948	99	-0.014777005	0.012243852	0.064399064	-73.72870205
M7672	3B	636444735	0.12309783	0.484536082	99	-0.014777005	0.01223955	0.056760243	57.27511389
M8024	3B	773526329	0.123119003	0.360824742	99	-0.014777005	0.012236457	0.082514924	121.0437808
M12829	6A	0	0.123287882	0.443298969	99	-0.014777005	0.012211806	0.051004125	46.24748061
M5381	2D	16719597	0.123481261	0.268041237	99	-0.014777005	0.012183626	0.064302002	-73.50662224
M4181	2B	154255733	0.123533856	0.257731959	99	-0.014777005	0.012175971	0.053940932	51.72665097
M4409	2B	124973674	0.123543786	0.402061856	99	-0.014777005	0.012174525	0.05127402	-46.73822435
M1737	1B	637527763	0.123597003	0.134020619	99	-0.014777005	0.012166784	0.058368843	-60.56750004
M4210	2B	144565791	0.123603104	0.24742268	99	-0.014777005	0.012165896	0.05927242	-62.45724007
M8994	4A	637896815	0.123610618	0.278350515	99	-0.014777005	0.012164804	0.052764703	-49.49535867
M13158	6B	75943589	0.123674695	0.206185567	99	-0.014777005	0.012155488	0.057527571	-58.83415868
M12192	6A	9372486	0.12367746	0.237113402	99	-0.014777005	0.012155086	0.054068992	51.97254934
M12338	6A	26726508	0.123690101	0.391752577	99	-0.014777005	0.012153249	0.060724484	-65.55489711
M5398	2D	15630222	0.123835778	0.154639175	99	-0.014777005	0.012132093	0.055642942	55.04243488
M12052	6A	0	0.123864506	0.134020619	99	-0.014777005	0.012127925	0.061030854	66.21804688
M2619	2A	104921223	0.123889513	0.309278351	99	-0.014777005	0.012124297	0.057336194	-58.4433621
M10091	5A	473321191	0.123901022	0.391752577	99	-0.014777005	0.012122628	0.050696091	45.69055292
M9169	4A	709851770	0.124007971	0.24742268	99	-0.014777005	0.012107123	0.053299198	-50.50319087
M650	1A	132445223	0.124062941	0.453608247	99	-0.014777005	0.01209916	0.06174815	67.78371606
M11370	5B	435250357	0.124095002	0.381443299	99	-0.014777005	0.012094517	0.052790533	49.54382884
M2441	2A	16617232	0.124131767	0.474226804	99	-0.014777005	0.012089195	0.0754867	101.3020783
M2185	1D	423927982	0.124138229	0.237113402	99	-0.014777005	0.01208826	0.059765606	63.50093637
M15325	7B	200352412	0.124140586	0.18556701	99	-0.014777005	0.012087919	0.056867862	57.49251015
M5999	2D	37152237	0.124215772	0.484536082	99	-0.014777005	0.012077041	0.05732787	-58.42639427
M6028	3A	192145005	0.124342007	0.463917526	99	-0.014777005	0.012058795	0.061053886	-66.26803589
M6884	3B	35796740	0.12442399	0.474226804	99	-0.014777005	0.012046956	0.058539452	60.92208757
M6095	3A	140700735	0.124666285	0.402061856	99	-0.014777005	0.012012019	0.05656607	-56.88391601
M7163	3B	244662945	0.124681742	0.453608247	99	-0.014777005	0.012009792	0.051113809	46.44660319
M12371	6A	305511739	0.124701889	0.412371134	99	-0.014777005	0.012006891	0.058054317	59.9165099
M8208	3B	828627115	0.124813631	0.340206186	99	-0.014777005	0.01199081	0.051806787	47.71454481
M4327	2B	145518027	0.124946422	0.463917526	99	-0.014777005	0.01197172	0.058381826	60.59444665
M2295	1D	1663783	0.125114016	0.474226804	99	-0.014777005	0.011947659	0.058651467	61.15546002
M15502	7B	0	0.125114213	0.278350515	99	-0.014777005	0.011947631	0.051043217	46.31839993
M8627	4A	428572127	0.12520345	0.453608247	99	-0.014777005	0.011934835	0.054838202	-53.46183797
M3802	2B	456534362	0.125282622	0.206185567	99	-0.014777005	0.01192349	0.056575222	-56.90232415
M34	1A	3982825	0.125302643	0.082474227	99	-0.014777005	0.011920623	0.062062008	68.47454019
M4705	2B	711319990	0.12544723	0.226804124	99	-0.014777005	0.01189993	0.053702298	-51.26998808
M14930	7A	700509978	0.125448132	0.113402062	99	-0.014777005	0.011899801	0.063008062	70.57806018
M2509	2A	51108076	0.125466647	0.474226804	99	-0.014777005	0.011897153	0.052999109	-49.93609822
M9938	5A	79264462	0.125519724	0.453608247	99	-0.014777005	0.011889565	0.062599799	69.66639714
M8889	4A	747299239	0.125524708	0.484536082	99	-0.014777005	0.011888852	0.057307308	58.38448903
M8775	4A	584388334	0.125539757	0.082474227	99	-0.014777005	0.011886702	0.062970586	70.49412829
M14964	7A	477189698	0.125542801	0.24742268	99	-0.014777005	0.011886267	0.059756148	63.48083877
M15393	7B	500789093	0.125617884	0.041237113	99	-0.014777005	0.011875541	0.084161212	-125.9219474
[truncated: 13,601 more rows]
