# Supplementary material for: Genome-wide association study of drought tolerance and biomass allocation in wheat
Source: PLoS One. 2019 Dec 4;14(12):e0225383. doi: 10.1371/journal.pone.0225383 (PMC6892492; doi:10.1371/journal.pone.0225383)
Supplement: S12 Table — (CSV) [file pone.0225383.s012.csv]

SNP	Chromosome	Position	P.value	maf	nobs	Rsquare.of.Model.without.SNP	Rsquare.of.Model.with.SNP	FDR_Adjusted_P-values	effect
M7970	3B	95564668	5.11E-05	0.453608247	99	0.18692084	0.348682704	0.042897029	115.7751045
M7199	2B	157603272	0.000106819	0.12371134	99	0.18692084	0.333760336	0.042897029	-157.6431379
M7089	3B	22917259	0.000176989	0.103092784	99	0.18692084	0.323707064	0.042897029	181.6598638
M11177	5B	0	0.000187102	0.06185567	99	0.18692084	0.322609451	0.042897029	226.4213045
M15111	7A	718204695	0.000196631	0.257731959	99	0.18692084	0.32162968	0.042897029	123.9894011
M1785	1B	646178482	0.000377459	0.268041237	99	0.18692084	0.308895755	0.056049282	108.6847194
M3123	2A	748451453	0.000380298	0.268041237	99	0.18692084	0.308750833	0.056049282	141.4389111
M4551	2B	565077064	0.000411069	0.268041237	99	0.18692084	0.307248004	0.056049282	161.9755795
M7428	3B	303590858	0.000673593	0.154639175	99	0.18692084	0.297790327	0.050946816	114.6303357
M774	1B	89404769	0.000704625	0.237113402	99	0.18692084	0.296934866	0.070157152	-157.8535911
M5233	2B	794002225	0.000744536	0.319587629	99	0.18692084	0.295890034	0.062306657	140.189979
M7173	3B	41138847	0.001132667	0.432989691	99	0.18692084	0.287992396	0.041420089	93.19520021
M3717	2B	77176639	0.001159628	0.402061856	99	0.18692084	0.287552705	0.031246757	182.8952034
M7090	3B	22917259	0.001314694	0.06185567	99	0.18692084	0.285212639	0.043197822	-187.1950995
M11820	5B	212365503	0.001422329	0.309278351	99	0.18692084	0.283750307	0.04972261	-111.8758734
M1357	1B	7319459	0.001508021	0.164948454	99	0.18692084	0.282665626	0.051913854	-116.8061723
M9428	4A	733792535	0.001509725	0.329896907	99	0.18692084	0.282644704	0.050422046	113.4496024
M1476	1B	544133182	0.001686977	0.257731959	99	0.18692084	0.280592346	0.056557351	147.7254039
M5291	2B	795769119	0.001801227	0.154639175	99	0.18692084	0.279384432	0.050772886	114.2389924
M14316	7A	18084583	0.001880838	0.092783505	99	0.18692084	0.278588679	0.061290251	-137.9030638
M6724	3A	715199344	0.001910592	0.443298969	99	0.18692084	0.278300181	1	-87.25548716
M13418	6B	574666443	0.001948932	0.257731959	99	0.18692084	0.27793521	1	-112.1459372
M11513	5B	559992958	0.00195658	0.195876289	99	0.18692084	0.277863301	1	115.1063496
M4368	2B	459249657	0.002046864	0.103092784	99	0.18692084	0.277035671	1	-167.0256434
M6620	3A	686200851	0.002120108	0.18556701	99	0.18692084	0.276391535	1	-108.362742
M6193	3A	220131274	0.002163395	0.051546392	99	0.18692084	0.276021589	1	153.3631982
M4110	2B	384320443	0.002278428	0.082474227	99	0.18692084	0.275074514	1	159.9145577
M4459	2B	649949245	0.002295727	0.412371134	99	0.18692084	0.274936382	1	-134.8637221
M5641	2D	587305772	0.0023478	0.134020619	99	0.18692084	0.274526999	1	109.0645657
M5706	2D	591603469	0.002372613	0.371134021	99	0.18692084	0.274335227	1	145.1636997
M1559	1B	685243263	0.002442801	0.371134021	99	0.18692084	0.273803786	1	-135.4575049
M9427	4A	733792535	0.002505427	0.432989691	99	0.18692084	0.273342777	1	-92.2934908
M12225	6A	17652529	0.002574117	0.340206186	99	0.18692084	0.27285066	1	-127.1021778
M4754	2B	600038125	0.002594239	0.360824742	99	0.18692084	0.272709072	1	-111.1590878
M2904	2A	502932671	0.002746405	0.402061856	99	0.18692084	0.271673814	1	-93.00157639
M10863	5B	422121027	0.003185006	0.309278351	99	0.18692084	0.268992727	1	-113.9760413
M976	1B	94373668	0.003226684	0.298969072	99	0.18692084	0.268758158	1	-136.7070659
M14380	7A	0	0.003235144	0.494845361	99	0.18692084	0.268710927	1	120.6482657
M14665	7A	112180967	0.003451671	0.154639175	99	0.18692084	0.267543794	1	102.4113742
M5663	2D	725913205	0.003559202	0.494845361	99	0.18692084	0.266992093	1	101.0624791
M7427	3B	303590858	0.003609179	0.18556701	99	0.18692084	0.266741539	1	-89.71806552
M14468	7A	60679438	0.003656819	0.278350515	99	0.18692084	0.266506025	1	135.5942658
M3987	2B	159210768	0.003710408	0.329896907	99	0.18692084	0.266244878	1	-147.9929399
M10879	5B	0	0.004067376	0.360824742	99	0.18692084	0.264599293	1	86.18509246
M1798	1B	646777010	0.004079029	0.020618557	99	0.18692084	0.264548129	1	-224.6518492
M5903	2D	612184445	0.004093756	0.402061856	99	0.18692084	0.264483692	1	-148.434163
M1565	1B	592833254	0.004127909	0.474226804	99	0.18692084	0.264335171	1	-76.02983205
M9309	4A	719934001	0.004339769	0.350515464	99	0.18692084	0.263441436	1	-97.46146092
M12100	6A	9798353	0.00434231	0.268041237	99	0.18692084	0.263430996	1	102.5834294
M5909	2D	615707186	0.004383733	0.391752577	99	0.18692084	0.263261656	1	-189.8294893
M14114	6D	0	0.004545438	0.134020619	99	0.18692084	0.26261614	1	-119.3008387
M2298	1D	488579573	0.00461962	0.329896907	99	0.18692084	0.262327946	1	-90.52995017
M7039	3B	17613543	0.004717559	0.206185567	99	0.18692084	0.261954737	1	107.5679004
M8718	4A	514257276	0.004737127	0.474226804	99	0.18692084	0.261881136	1	83.40244961
M10831	5B	37974769	0.00490935	0.154639175	99	0.18692084	0.261246655	1	105.3976037
M1626	1B	614701448	0.004911257	0.144329897	99	0.18692084	0.261239758	1	106.3900425
M3664	2B	59764104	0.005053922	0.051546392	99	0.18692084	0.260731645	1	-176.9860816
M6323	3A	238337704	0.005067728	0.309278351	99	0.18692084	0.260683267	1	90.96080039
M3137	2A	0	0.005093206	0.422680412	99	0.18692084	0.260594347	1	-84.44460431
M14440	7A	36512654	0.005374728	0.484536082	99	0.18692084	0.259641512	1	-157.1734795
M4601	2B	551450193	0.005447453	0.206185567	99	0.18692084	0.259403796	1	92.1863264
M2869	2A	553276886	0.005461338	0.381443299	99	0.18692084	0.259358786	1	-176.4173699
M12620	6A	563126991	0.005508292	0.412371134	99	0.18692084	0.259207451	1	81.23004828
M10917	5B	455741036	0.005519733	0.278350515	99	0.18692084	0.25917078	1	128.8646178
M1566	1B	592833254	0.005538393	0.371134021	99	0.18692084	0.259111139	1	75.18805004
M2168	1D	423928525	0.005561594	0.371134021	99	0.18692084	0.259037277	1	86.17680473
M6519	3A	633055334	0.005599767	0.134020619	99	0.18692084	0.258916443	1	110.0909377
M14443	7A	352533828	0.005616696	0.474226804	99	0.18692084	0.25886313	1	155.5999592
M11081	5B	529496598	0.005732097	0.226804124	99	0.18692084	0.258504094	1	105.6627208
M5337	2B	789493633	0.005904421	0.371134021	99	0.18692084	0.25798172	1	-153.3928811
M10884	5B	520209151	0.006000422	0.309278351	99	0.18692084	0.257697542	1	-94.03083678
M5500	2D	74936166	0.006092403	0.360824742	99	0.18692084	0.257429671	1	90.01874219
M5519	2D	74929509	0.006176617	0.402061856	99	0.18692084	0.25718808	1	-87.54106781
M14016	6D	306139692	0.006188983	0.422680412	99	0.18692084	0.257152895	1	137.2445439
M3384	2A	585501135	0.006541081	0.268041237	99	0.18692084	0.256180608	1	-71.7137283
M9437	4B	2213400	0.006611761	0.381443299	99	0.18692084	0.255992009	1	-80.23315356
M6571	3A	655669363	0.006747409	0.371134021	99	0.18692084	0.25563586	1	84.31134258
M9941	5A	52738363	0.006747848	0.484536082	99	0.18692084	0.255634718	1	-86.46240842
M4262	2B	553279131	0.006753293	0.226804124	99	0.18692084	0.255620579	1	-78.190031
M14627	7A	124069487	0.006760485	0.484536082	99	0.18692084	0.255601923	1	-121.330997
M2116	1D	472550886	0.006884455	0.340206186	99	0.18692084	0.255283531	1	-97.39066099
M6619	3A	686200851	0.007034956	0.24742268	99	0.18692084	0.25490493	1	122.9617183
M5127	2B	221893152	0.007062618	0.402061856	99	0.18692084	0.254836263	1	112.7445226
M3851	2B	92221173	0.007130119	0.402061856	99	0.18692084	0.254669866	1	-152.2134451
M12311	6A	23587868	0.007236878	0.443298969	99	0.18692084	0.254410021	1	91.81527783
M2096	1D	366012746	0.007389856	0.443298969	99	0.18692084	0.254044557	1	-141.8346671
M10967	5B	393940604	0.007448345	0.463917526	99	0.18692084	0.253906907	1	-79.25635457
M13438	6B	617644199	0.007594676	0.443298969	99	0.18692084	0.253567401	1	99.64577881
M7463	3B	415924572	0.007600586	0.432989691	99	0.18692084	0.253553831	1	-93.17550186
M14423	7A	35387463	0.00761147	0.154639175	99	0.18692084	0.253528873	1	150.9119874
M3693	2B	68579934	0.007665337	0.319587629	99	0.18692084	0.253405891	1	122.0920856
M7787	3B	722479372	0.007813533	0.082474227	99	0.18692084	0.253072143	1	-124.2635321
M6573	3A	417553440	0.008013275	0.474226804	99	0.18692084	0.252632605	1	-73.73943827
M11817	5B	691998063	0.008075702	0.340206186	99	0.18692084	0.252497573	1	-119.1774922
M60	1A	150793813	0.008099041	0.288659794	99	0.18692084	0.252447367	1	-94.45128059
M5282	2B	549670301	0.008127935	0.350515464	99	0.18692084	0.252385424	1	-150.9864587
M1632	1B	587501291	0.008210138	0.206185567	99	0.18692084	0.252210441	1	88.40753559
M1358	1B	7319459	0.008237901	0.309278351	99	0.18692084	0.252151755	1	80.07022523
M2612	2A	0	0.00826353	0.360824742	99	0.18692084	0.252097762	1	-83.16993465
M13312	6B	0	0.008294969	0.24742268	99	0.18692084	0.252031768	1	-113.2461493
M12190	6A	9461899	0.008317593	0.360824742	99	0.18692084	0.251984439	1	-105.4068196
M6632	3A	691041856	0.008392432	0.268041237	99	0.18692084	0.251828829	1	-78.92531202
M9383	4A	739304166	0.008498339	0.288659794	99	0.18692084	0.251611076	1	81.88416537
M12011	5D	552080511	0.00854606	0.484536082	99	0.18692084	0.251513881	1	-97.94383861
M5042	2B	749345224	0.008712425	0.494845361	99	0.18692084	0.251179415	1	-79.10509787
M7193	3B	35451949	0.008852421	0.350515464	99	0.18692084	0.250903086	1	-70.37981056
M11941	5D	490937616	0.008858417	0.484536082	99	0.18692084	0.250891352	1	91.79917607
M4203	2B	677048859	0.008895489	0.154639175	99	0.18692084	0.250818992	1	94.23735448
M7540	3B	513663423	0.008911439	0.288659794	99	0.18692084	0.250787958	1	80.91365991
M7883	3B	749763064	0.008931207	0.340206186	99	0.18692084	0.250749573	1	103.6877354
M5988	2D	786225684	0.009043247	0.164948454	99	0.18692084	0.250533683	1	-82.54393404
M8011	3B	533130365	0.009119877	0.134020619	99	0.18692084	0.250387626	1	104.0987743
M3703	2B	66559474	0.009276995	0.319587629	99	0.18692084	0.250092126	1	-112.0672161
M11080	5B	505694656	0.00930135	0.340206186	99	0.18692084	0.250046787	1	76.35541294
M15186	7B	33652142	0.009529218	0.154639175	99	0.18692084	0.249628512	1	-101.9297098
M6545	3A	0	0.00966326	0.216494845	99	0.18692084	0.249387316	1	-92.56116343
M9939	5A	2861753	0.009907735	0.206185567	99	0.18692084	0.248956273	1	-91.93107456
M14438	7A	37098983	0.009917068	0.144329897	99	0.18692084	0.248940039	1	134.2777542
M6658	3A	696239384	0.009970002	0.072164948	99	0.18692084	0.248848263	1	-126.3021525
M7106	3B	21863643	0.01006922	0.24742268	99	0.18692084	0.248677603	1	122.2931562
M4460	2B	649949245	0.010189382	0.164948454	99	0.18692084	0.248473257	1	97.29351204
M11146	5B	502377352	0.010201241	0.020618557	99	0.18692084	0.248453226	1	219.3856325
M11865	5B	696578657	0.010453603	0.092783505	99	0.18692084	0.248032645	1	-105.8135879
M13416	6B	489437050	0.010567164	0.144329897	99	0.18692084	0.247846837	1	-104.7044196
M345	1A	486815863	0.010612526	0.278350515	99	0.18692084	0.247773197	1	-177.9874533
M10848	5B	420193748	0.010636758	0.175257732	99	0.18692084	0.247733995	1	89.72837838
M4708	2B	711319990	0.010684667	0.350515464	99	0.18692084	0.247656762	1	-234.5798275
M13471	6B	0	0.010684667	0.350515464	99	0.18692084	0.247656762	1	234.5798275
M9067	4A	686897296	0.010686696	0.12371134	99	0.18692084	0.247653499	1	-90.9205153
M10024	5A	423174439	0.010701633	0.381443299	99	0.18692084	0.247629499	1	-159.5257998
M9506	4B	449189961	0.010748481	0.371134021	99	0.18692084	0.24755445	1	-64.65982344
M69	1A	10423224	0.010829383	0.360824742	99	0.18692084	0.24742565	1	-116.9408435
M14410	7A	31106605	0.010888719	0.371134021	99	0.18692084	0.247331823	1	159.5369366
M4246	2B	165245434	0.011117099	0.443298969	99	0.18692084	0.246975607	1	104.9723912
M13310	6B	262401776	0.011183691	0.484536082	99	0.18692084	0.24687318	1	88.91311553
M719	1B	6072803	0.011214127	0.422680412	99	0.18692084	0.246826579	1	-85.04060931
M10554	5B	9044910	0.011245165	0.340206186	99	0.18692084	0.246779191	1	74.25233234
M4539	2B	670299111	0.011270772	0.453608247	99	0.18692084	0.246740198	1	106.1177316
M1287	1B	462987278	0.011306738	0.350515464	99	0.18692084	0.246685588	1	-204.1762796
M2911	2A	676994096	0.01147422	0.298969072	99	0.18692084	0.246433654	1	233.6356734
M805	1B	2784530	0.011481331	0.329896907	99	0.18692084	0.246423043	1	156.0543179
M7300	3B	19380506	0.011590904	0.24742268	99	0.18692084	0.246260395	1	88.42630938
M10054	5A	0	0.011597499	0.288659794	99	0.18692084	0.246250658	1	128.3963049
M2867	2A	435071770	0.011650094	0.360824742	99	0.18692084	0.246173203	1	195.6007821
M14899	7A	693025273	0.011651408	0.257731959	99	0.18692084	0.246171273	1	-80.86126589
M4339	2B	422190933	0.011661827	0.494845361	99	0.18692084	0.246155975	1	75.4446002
M13002	6B	14333860	0.011685992	0.360824742	99	0.18692084	0.246120548	1	-83.60217453
M12289	6A	14388578	0.011748327	0.381443299	99	0.18692084	0.246029516	1	96.07989257
M10883	5B	520209151	0.011858878	0.340206186	99	0.18692084	0.245869307	1	71.88416177
M8732	4A	521608777	0.01191515	0.051546392	99	0.18692084	0.245788358	1	116.8245721
M5842	2D	579196310	0.01194285	0.329896907	99	0.18692084	0.245748657	1	-71.85627139
M3997	2B	0	0.011986803	0.319587629	99	0.18692084	0.245685861	1	-143.5656332
M825	1B	28701051	0.012024345	0.474226804	99	0.18692084	0.245632413	1	-87.23665311
M7132	3B	24940760	0.012035988	0.278350515	99	0.18692084	0.245615872	1	-145.5452847
M136	1A	20866783	0.012110519	0.443298969	99	0.18692084	0.245510388	1	82.01284308
M11740	5B	676094493	0.012220425	0.371134021	99	0.18692084	0.245356068	1	178.9479927
M812	1B	0	0.012284818	0.278350515	99	0.18692084	0.245266328	1	-104.2170144
M6559	3A	651994615	0.012359777	0.134020619	99	0.18692084	0.245162482	1	97.20203781
M4675	2B	595508003	0.012373028	0.371134021	99	0.18692084	0.245144192	1	77.20297587
M4552	2B	565077064	0.012376087	0.309278351	99	0.18692084	0.245139972	1	-123.9855552
M3989	2B	126899677	0.012379954	0.350515464	99	0.18692084	0.24513464	1	-155.8745044
M72	1A	10132748	0.012490067	0.154639175	99	0.18692084	0.244983539	1	113.0917142
M10950	5B	526866057	0.012505695	0.463917526	99	0.18692084	0.244962207	1	-69.92281386
M14391	7A	29138301	0.012555583	0.463917526	99	0.18692084	0.244894295	1	84.10385792
M10478	5A	613546871	0.01261744	0.453608247	99	0.18692084	0.244810482	1	-74.71547317
M8220	3B	825858484	0.012640393	0.103092784	99	0.18692084	0.244779492	1	-110.3893997
M6631	3A	691041856	0.012654173	0.237113402	99	0.18692084	0.244760915	1	91.44334135
M8035	3B	768723678	0.01270466	0.164948454	99	0.18692084	0.244693032	1	90.04105254
M4568	2B	545270114	0.012928031	0.226804124	99	0.18692084	0.244396052	1	75.6627172
M13528	6B	29569629	0.012952063	0.06185567	99	0.18692084	0.244364421	1	-156.6372265
M4513	2B	299291476	0.013001585	0.340206186	99	0.18692084	0.244299434	1	117.1838332
M4566	2B	692625689	0.013187259	0.494845361	99	0.18692084	0.244058064	1	-91.07496987
M11867	5B	552916735	0.013268273	0.092783505	99	0.18692084	0.243953862	1	104.0740938
M3993	2B	543306948	0.013314066	0.391752577	99	0.18692084	0.243895258	1	-146.9255277
M7517	3B	426296060	0.013420245	0.319587629	99	0.18692084	0.24376018	1	-102.4968745
M12034	5D	561671414	0.013457249	0.443298969	99	0.18692084	0.243713367	1	77.80637503
M3807	2B	157603272	0.013490506	0.268041237	99	0.18692084	0.243671411	1	92.112654
M1549	1B	566170601	0.013493247	0.350515464	99	0.18692084	0.243667958	1	-202.5081772
M10864	5B	422121027	0.013700178	0.360824742	99	0.18692084	0.243409358	1	176.5006759
M9740	4D	663571979	0.013820762	0.402061856	99	0.18692084	0.243260547	1	117.8978375
M8436	3D	523552116	0.013857014	0.412371134	99	0.18692084	0.243216076	1	-75.23260202
M750	1B	12374383	0.014000813	0.350515464	99	0.18692084	0.243040865	1	-82.10186086
M4547	2B	37117645	0.0140768	0.288659794	99	0.18692084	0.24294904	1	87.2164797
M1658	1B	73116851	0.014101572	0.278350515	99	0.18692084	0.242919217	1	-101.4845469
M14320	7A	0	0.014147443	0.371134021	99	0.18692084	0.242864137	1	-71.80697497
M4192	2B	704873966	0.014174691	0.422680412	99	0.18692084	0.242831507	1	-83.14766741
M39	1A	2236676	0.014236556	0.268041237	99	0.18692084	0.242757669	1	111.6427235
M1918	1B	679383844	0.014279205	0.298969072	99	0.18692084	0.24270696	1	-184.7622074
M283	1A	403145168	0.014279205	0.298969072	99	0.18692084	0.24270696	1	-184.7622074
M6009	2D	761851219	0.014279205	0.298969072	99	0.18692084	0.24270696	1	184.7622074
M1378	1B	471174490	0.014481252	0.360824742	99	0.18692084	0.242468871	1	70.23315804
M1784	1B	557155175	0.014488839	0.268041237	99	0.18692084	0.242459999	1	66.60057107
M4202	2B	562512178	0.014619935	0.103092784	99	0.18692084	0.242307459	1	105.4354033
M9778	4D	450148197	0.014703678	0.072164948	99	0.18692084	0.242210766	1	-120.4938905
M12314	6A	0	0.014707646	0.443298969	99	0.18692084	0.242206199	1	-77.33092114
M11075	5B	592867962	0.014720278	0.06185567	99	0.18692084	0.242191667	1	130.3620467
M1464	1B	557465111	0.014781053	0.237113402	99	0.18692084	0.242121938	1	73.17450413
M12238	6A	71414592	0.014884013	0.298969072	99	0.18692084	0.242004492	1	116.1477259
M11795	5B	625779199	0.014996798	0.051546392	99	0.18692084	0.241876813	1	140.6836611
M11544	5B	194318754	0.014998868	0.298969072	99	0.18692084	0.24187448	1	119.4334137
M5517	2D	212311734	0.015015534	0.144329897	99	0.18692084	0.241855701	1	-86.94830736
M10270	5A	434483981	0.015071611	0.164948454	99	0.18692084	0.241792675	1	-95.78099246
M3680	2B	38442340	0.015074281	0.082474227	99	0.18692084	0.241789681	1	138.2292841
M3857	2B	127151364	0.015075703	0.288659794	99	0.18692084	0.241788086	1	-103.3477195
M4837	2B	745683074	0.015159229	0.453608247	99	0.18692084	0.241694692	1	90.15989809
M2216	1D	435046048	0.015292952	0.154639175	99	0.18692084	0.24154629	1	80.83488802
M14514	7A	55205086	0.015311427	0.402061856	99	0.18692084	0.241525893	1	80.80477298
M7927	3B	402859187	0.01542619	0.092783505	99	0.18692084	0.241399774	1	105.8061947
M14506	7A	55923161	0.015437495	0.278350515	99	0.18692084	0.241387403	1	81.38272535
M10898	5B	525773748	0.015458105	0.082474227	99	0.18692084	0.241364876	1	114.1994908
M13333	6B	218963791	0.015529577	0.432989691	99	0.18692084	0.241286996	1	-96.77762462
M12906	6A	614446534	0.015606996	0.206185567	99	0.18692084	0.241203061	1	-76.01194918
M6986	3B	680113396	0.015664787	0.144329897	99	0.18692084	0.241140689	1	82.84575733
M4007	2B	184494452	0.015719867	0.381443299	99	0.18692084	0.241081468	1	-157.5507625
M9987	5A	333414537	0.015757009	0.24742268	99	0.18692084	0.241041657	1	-68.46828845
M8660	4A	321099074	0.015829258	0.082474227	99	0.18692084	0.240964497	1	-99.09561701
M3876	2B	730608229	0.015844568	0.350515464	99	0.18692084	0.240948194	1	96.77316671
M7453	3B	429463062	0.015935187	0.402061856	99	0.18692084	0.240852034	1	93.95699033
M8873	4A	45129083	0.016057132	0.381443299	99	0.18692084	0.240723535	1	-99.9219458
M9917	5A	39747060	0.016145301	0.350515464	99	0.18692084	0.240631264	1	-61.53969814
M13870	6D	3617227	0.016245628	0.257731959	99	0.18692084	0.240526911	1	112.4901431
M11648	5B	609144429	0.016273661	0.257731959	99	0.18692084	0.240497874	1	93.00794073
M9874	5A	27509864	0.016348559	0.422680412	99	0.18692084	0.240420551	1	-67.7914735
M216	1A	288094235	0.016501678	0.030927835	99	0.18692084	0.240263625	1	168.3467774
M388	1A	511415495	0.016540889	0.402061856	99	0.18692084	0.240223685	1	76.82483765
M10372	5A	572020800	0.016694977	0.257731959	99	0.18692084	0.240067691	1	84.03368141
M4066	2B	296109009	0.016734144	0.474226804	99	0.18692084	0.240028282	1	-86.43126752
M2173	1D	415773502	0.016814678	0.402061856	99	0.18692084	0.239947551	1	-104.3529356
M12957	6B	732212	0.016834422	0.484536082	99	0.18692084	0.239927821	1	82.79015528
M10662	5B	71300457	0.016915211	0.195876289	99	0.18692084	0.239847341	1	-92.64134467
M4031	2B	572862830	0.016993326	0.06185567	99	0.18692084	0.239769908	1	-133.4545659
M11743	5B	680852435	0.017210109	0.381443299	99	0.18692084	0.239556963	1	150.4909529
M11770	5B	683000490	0.017210109	0.381443299	99	0.18692084	0.239556963	1	-150.4909529
M4791	2B	724734789	0.017366998	0.092783505	99	0.18692084	0.239404604	1	-112.8052811
M4162	2B	680760736	0.017405255	0.195876289	99	0.18692084	0.23936767	1	-88.1802947
M3219	2A	0	0.017427803	0.103092784	99	0.18692084	0.239345942	1	110.6756117
M3794	2B	96381383	0.017565941	0.484536082	99	0.18692084	0.239213471	1	-101.5016695
M7900	3B	752274170	0.017678741	0.371134021	99	0.18692084	0.239106109	1	-142.6206873
M7949	3B	0	0.017678741	0.371134021	99	0.18692084	0.239106109	1	-142.6206873
M11726	5B	664683778	0.0178193	0.103092784	99	0.18692084	0.23897333	1	97.03611883
M4995	2B	528759744	0.01786353	0.216494845	99	0.18692084	0.238931775	1	-81.38422274
M6699	3A	505333325	0.018005357	0.381443299	99	0.18692084	0.238799254	1	80.33660364
M10140	5A	482358282	0.018027239	0.319587629	99	0.18692084	0.238778906	1	-63.94151176
M14136	7A	4013265	0.01806449	0.484536082	99	0.18692084	0.238744326	1	-64.57856097
M9083	4A	690887990	0.018113184	0.082474227	99	0.18692084	0.238699235	1	92.96211506
M7465	3B	206291923	0.018127786	0.195876289	99	0.18692084	0.238685739	1	-73.91566112
M4179	2B	75627521	0.018184719	0.360824742	99	0.18692084	0.238633225	1	-114.170933
M3696	2B	69066012	0.018193908	0.103092784	99	0.18692084	0.238624766	1	114.9092091
M11454	5B	651409879	0.018211726	0.134020619	99	0.18692084	0.238608376	1	-85.68085836
M816	1B	183264864	0.018322009	0.494845361	99	0.18692084	0.238507301	1	76.57246893
M4107	2B	277093048	0.018457075	0.381443299	99	0.18692084	0.238384381	1	147.9045753
M5070	2B	766233155	0.01852168	0.195876289	99	0.18692084	0.238325921	1	73.36877049
M9152	4A	441240399	0.018529013	0.463917526	99	0.18692084	0.238319299	1	-104.0118939
M13717	6B	0	0.018563107	0.103092784	99	0.18692084	0.238288546	1	97.96500346
M13356	6B	200818275	0.018592791	0.432989691	99	0.18692084	0.238261821	1	106.748136
M3267	2A	770146684	0.018600866	0.402061856	99	0.18692084	0.238254558	1	89.18415816
M9259	4A	724783161	0.018627138	0.072164948	99	0.18692084	0.238230952	1	128.317242
M2317	1D	487954965	0.018677513	0.24742268	99	0.18692084	0.238185787	1	-83.12095074
M1015	1B	50019841	0.018757289	0.06185567	99	0.18692084	0.238114523	1	131.456337
M5918	2D	560626965	0.018902671	0.12371134	99	0.18692084	0.23798547	1	-123.2349549
M12483	6A	241374244	0.018965222	0.453608247	99	0.18692084	0.237930267	1	101.9148342
M83	1A	14718514	0.019043783	0.391752577	99	0.18692084	0.237861204	1	78.77769131
M15459	7B	583544299	0.019111832	0.371134021	99	0.18692084	0.237801625	1	-71.03105395
M13465	6B	326519277	0.019210698	0.020618557	99	0.18692084	0.23771546	1	213.7766973
M14202	7A	556299936	0.019403524	0.268041237	99	0.18692084	0.237548743	1	-72.04398728
M10461	5A	614408666	0.019555509	0.391752577	99	0.18692084	0.237418561	1	69.53413193
M12090	6A	0	0.019598465	0.443298969	99	0.18692084	0.237381961	1	-79.09301281
M6394	3A	363608529	0.019722507	0.453608247	99	0.18692084	0.237276744	1	-66.85125036
M6542	3A	501061731	0.019752238	0.175257732	99	0.18692084	0.237251629	1	73.07722298
M4161	2B	680760736	0.019757529	0.484536082	99	0.18692084	0.237247163	1	86.17217515
M4951	2B	762073843	0.019864104	0.134020619	99	0.18692084	0.237157485	1	-89.28276055
M14896	7A	694049602	0.019873046	0.484536082	99	0.18692084	0.237149983	1	-74.67247827
M1110	1B	744753328	0.020010857	0.226804124	99	0.18692084	0.237034825	1	-92.82857458
M8900	4A	668854110	0.020014385	0.268041237	99	0.18692084	0.237031887	1	106.8259908
M5316	2B	0	0.020014556	0.113402062	99	0.18692084	0.237031745	1	97.74656789
M8123	3B	322735845	0.020032588	0.381443299	99	0.18692084	0.237016742	1	160.8244484
M8828	4A	138660384	0.0200567	0.12371134	99	0.18692084	0.236996702	1	-101.8144657
M13289	6B	230607608	0.020171574	0.422680412	99	0.18692084	0.236901576	1	-94.25596642
M10515	5A	684647811	0.020183539	0.206185567	99	0.18692084	0.2368917	1	-78.24134259
M4364	2B	540660555	0.020185552	0.463917526	99	0.18692084	0.236890039	1	-67.87330063
M4287	2B	159563563	0.020208532	0.463917526	99	0.18692084	0.236871092	1	95.06513165
M8688	4A	478992616	0.02037585	0.082474227	99	0.18692084	0.236733818	1	102.5752362
M4628	2B	689711741	0.020418172	0.412371134	99	0.18692084	0.236699283	1	-69.89962878
M13155	6B	0	0.020418384	0.350515464	99	0.18692084	0.23669911	1	-75.76320268
M6718	3A	714450654	0.020424073	0.371134021	99	0.18692084	0.236694474	1	-78.52916306
M13	1A	0	0.020451853	0.432989691	99	0.18692084	0.236671853	1	58.10382494
M10970	5B	472662963	0.020458266	0.391752577	99	0.18692084	0.236666637	1	62.17867842
M4474	2B	638230965	0.020499138	0.278350515	99	0.18692084	0.236633425	1	75.49173017
M3627	2B	419250140	0.020504758	0.402061856	99	0.18692084	0.236628864	1	134.6433961
M14479	7A	49592914	0.020591184	0.381443299	99	0.18692084	0.236558887	1	139.0028287
M3435	2B	15951770	0.020639158	0.329896907	99	0.18692084	0.236520177	1	-80.84146719
M9153	4A	708632121	0.020708533	0.226804124	99	0.18692084	0.236464366	1	77.46663341
M10368	5A	689204261	0.020734419	0.422680412	99	0.18692084	0.236443592	1	86.50648075
M10564	5B	11085155	0.020768698	0.309278351	99	0.18692084	0.236416124	1	-161.7206788
M13260	6B	215650786	0.020911472	0.113402062	99	0.18692084	0.23630223	1	-93.39008276
M12823	6A	605225151	0.021127939	0.432989691	99	0.18692084	0.236131105	1	127.2531936
M7064	3B	54351100	0.021231486	0.092783505	99	0.18692084	0.2360499	1	101.9915853
M10850	5B	664263082	0.021391594	0.030927835	99	0.18692084	0.235925156	1	164.037032
M10110	5A	351863234	0.02144547	0.051546392	99	0.18692084	0.235883402	1	-152.7829611
M11901	5D	175947785	0.02144921	0.134020619	99	0.18692084	0.235880507	1	109.5743391
M3676	2B	6409896	0.021492876	0.484536082	99	0.18692084	0.235846752	1	66.71971243
M5865	2D	601604653	0.021521187	0.360824742	99	0.18692084	0.235824906	1	82.8464769
M4625	2B	599925082	0.021669907	0.453608247	99	0.18692084	0.235710642	1	-95.47535732
M3559	2B	0	0.021872	0.360824742	99	0.18692084	0.235556689	1	-72.98340943
M14439	7A	36512654	0.021973833	0.12371134	99	0.18692084	0.235479682	1	-128.2775834
M4106	2B	510796274	0.022036379	0.041237113	99	0.18692084	0.235432569	1	-155.1479226
M11860	5B	703899766	0.022227393	0.216494845	99	0.18692084	0.235289559	1	108.6544531
M10563	5B	11085155	0.022348401	0.463917526	99	0.18692084	0.235199631	1	90.7858407
M4915	2B	759189621	0.022463657	0.463917526	99	0.18692084	0.235114455	1	82.50167064
M733	1B	0	0.022474956	0.360824742	99	0.18692084	0.23510613	1	72.68784082
M6136	3A	455701026	0.022636336	0.381443299	99	0.18692084	0.234987701	1	78.83516592
M14895	7A	694049602	0.022724605	0.340206186	99	0.18692084	0.234923302	1	68.35228284
M4629	2B	427616803	0.022861742	0.453608247	99	0.18692084	0.234823771	1	-90.53509536
M11753	5B	678708672	0.022870323	0.371134021	99	0.18692084	0.234817564	1	-154.5373883
M11794	5B	656472011	0.022870323	0.371134021	99	0.18692084	0.234817564	1	-154.5373883
M11761	5B	681979338	0.022870323	0.371134021	99	0.18692084	0.234817564	1	154.5373883
M11787	5B	688224445	0.022870323	0.371134021	99	0.18692084	0.234817564	1	154.5373883
M5159	2B	782126877	0.02295814	0.278350515	99	0.18692084	0.234754184	1	-71.18004005
M9936	5A	79280510	0.023118243	0.402061856	99	0.18692084	0.23463929	1	117.6117774
M14755	7A	592045757	0.023201381	0.412371134	99	0.18692084	0.234579959	1	-114.5266677
M744	1B	2431679	0.023311969	0.443298969	99	0.18692084	0.234501385	1	-68.36534439
M3781	2B	59124498	0.02337837	0.463917526	99	0.18692084	0.234454395	1	-96.82824739
M5902	2D	606129207	0.023391331	0.463917526	99	0.18692084	0.23444524	1	-91.34040131
M5767	2D	26003239	0.023551765	0.453608247	99	0.18692084	0.234332352	1	-70.40523562
M7948	3B	761498146	0.023610297	0.371134021	99	0.18692084	0.234291368	1	-141.8719841
M11737	5B	672858608	0.023844436	0.154639175	99	0.18692084	0.234128494	1	-107.9960332
M5905	2D	755037267	0.023881153	0.340206186	99	0.18692084	0.234103105	1	66.94754515
M3958	2B	705800767	0.02390498	0.082474227	99	0.18692084	0.234086653	1	-99.66411759
M6576	3A	660003685	0.02390841	0.309278351	99	0.18692084	0.234084285	1	-83.76191877
M5697	2D	612367311	0.023944887	0.175257732	99	0.18692084	0.234059134	1	-71.63906988
M6409	3A	397200871	0.024502372	0.092783505	99	0.18692084	0.233679705	1	-147.1656911
M5898	2D	608405941	0.02454771	0.422680412	99	0.18692084	0.23364925	1	57.09690004
M5740	2D	607144225	0.024572258	0.257731959	99	0.18692084	0.233632785	1	-77.23558277
M4527	2B	547273650	0.024593909	0.237113402	99	0.18692084	0.233618278	1	-72.7675809
M6709	3A	614087671	0.024608759	0.360824742	99	0.18692084	0.233608335	1	-83.60008464
M2914	2A	15809369	0.024781832	0.329896907	99	0.18692084	0.233492923	1	69.24340901
M9536	4B	506277438	0.024875802	0.144329897	99	0.18692084	0.233430615	1	78.4381716
M12306	6A	0	0.024959653	0.12371134	99	0.18692084	0.233375228	1	74.44178219
M7323	3B	44296856	0.025186338	0.360824742	99	0.18692084	0.23322647	1	76.28096063
M12446	6A	74106762	0.025249464	0.072164948	99	0.18692084	0.233185297	1	-107.8302771
M3294	2A	706493326	0.025256095	0.329896907	99	0.18692084	0.233180978	1	-79.82491345
M11503	5B	142781109	0.025452349	0.237113402	99	0.18692084	0.233053701	1	-79.67236737
M2314	1D	489968994	0.025457616	0.474226804	99	0.18692084	0.2330503	1	-79.07013084
M15397	7B	522729143	0.025520923	0.432989691	99	0.18692084	0.233009474	1	78.86511123
M5880	2D	605350061	0.025584011	0.206185567	99	0.18692084	0.232968895	1	72.82533472
M4957	2B	761846794	0.025593629	0.216494845	99	0.18692084	0.232962718	1	87.64684994
M14060	6D	450169167	0.025914187	0.371134021	99	0.18692084	0.232758236	1	-78.34810671
M4854	2B	748703470	0.026004863	0.474226804	99	0.18692084	0.23270088	1	73.90899798
M11995	5D	548844664	0.02605241	0.391752577	99	0.18692084	0.232670889	1	-65.70603579
M2233	1D	583819101	0.02606351	0.309278351	99	0.18692084	0.232663895	1	72.12836875
M1687	1B	453210400	0.026068254	0.298969072	99	0.18692084	0.232660908	1	-64.24556484
M8342	3D	37969599	0.026083684	0.154639175	99	0.18692084	0.232651194	1	94.38519273
M1659	1B	164887594	0.026134589	0.309278351	99	0.18692084	0.232619189	1	100.5162113
M3965	2B	165049205	0.026171584	0.443298969	99	0.18692084	0.232595972	1	-116.3453142
M5585	2D	459879715	0.026178044	0.432989691	99	0.18692084	0.232591921	1	63.29386174
M4834	2B	733169296	0.02620496	0.24742268	99	0.18692084	0.232575056	1	-74.80784047
M4700	2B	728611163	0.02622159	0.257731959	99	0.18692084	0.232564644	1	-64.30418532
M6732	3A	717015565	0.026330403	0.06185567	99	0.18692084	0.232496693	1	-117.8678487
M14956	7A	710959153	0.026472977	0.154639175	99	0.18692084	0.232408106	1	-94.111754
M7257	3B	38722483	0.026560068	0.381443299	99	0.18692084	0.232354242	1	-79.35401057
M4340	2B	422190933	0.026568605	0.164948454	99	0.18692084	0.232348972	1	-71.02020405
M6209	3A	577683980	0.02661348	0.381443299	99	0.18692084	0.2323213	1	-127.1328675
M7416	3B	275636381	0.02661348	0.381443299	99	0.18692084	0.2323213	1	-127.1328675
M7881	3B	740106785	0.02661348	0.381443299	99	0.18692084	0.2323213	1	-127.1328675
M6158	3A	575259106	0.02661348	0.381443299	99	0.18692084	0.2323213	1	127.1328675
M1678	1B	599251551	0.026643953	0.360824742	99	0.18692084	0.232302537	1	150.5508963
M4439	2B	658617299	0.026671179	0.360824742	99	0.18692084	0.232285792	1	65.79358282
M865	1B	496978998	0.026685931	0.474226804	99	0.18692084	0.232276727	1	91.45729829
M15457	7B	0	0.02682244	0.319587629	99	0.18692084	0.232193092	1	-67.39863749
M5281	2B	549670301	0.0268355	0.051546392	99	0.18692084	0.232185114	1	149.0989928
M5849	2D	580188957	0.026988148	0.216494845	99	0.18692084	0.232092171	1	-83.70953115
M9736	4D	681466316	0.027020206	0.082474227	99	0.18692084	0.232072723	1	113.6840336
M9439	4B	7775094	0.027124176	0.340206186	99	0.18692084	0.232009816	1	82.63098495
M14146	7A	738781676	0.027144724	0.309278351	99	0.18692084	0.231997413	1	-82.32804659
M12423	6A	54772476	0.027214672	0.12371134	99	0.18692084	0.231955268	1	109.635704
M10865	5B	128642164	0.027305701	0.082474227	99	0.18692084	0.231900593	1	97.94758657
M820	1B	500146991	0.027378635	0.422680412	99	0.18692084	0.231856926	1	-63.06612522
M14533	7A	68211926	0.02745144	0.381443299	99	0.18692084	0.231813458	1	-113.2149495
M2278	1D	486387816	0.027486284	0.381443299	99	0.18692084	0.231792698	1	67.05763221
M13218	6B	140452382	0.027488155	0.381443299	99	0.18692084	0.231791584	1	-78.26697214
M13742	6B	0	0.027619498	0.309278351	99	0.18692084	0.231713586	1	64.35096786
M6683	3A	294935009	0.027634026	0.381443299	99	0.18692084	0.231704982	1	87.51982597
M10503	5A	680669676	0.027694722	0.309278351	99	0.18692084	0.23166909	1	-100.5658644
M5435	2D	33564182	0.027841447	0.113402062	99	0.18692084	0.231582669	1	81.92609861
M6687	3A	420562185	0.027853722	0.381443299	99	0.18692084	0.231575461	1	82.50161956
M12416	6A	60075194	0.028206066	0.432989691	99	0.18692084	0.231369981	1	-96.11834666
M6845	3A	329077007	0.028243671	0.463917526	99	0.18692084	0.231348211	1	-67.34933296
M6706	3A	711688019	0.02827711	0.319587629	99	0.18692084	0.231328879	1	-83.12141632
M5410	2D	20358088	0.028288666	0.237113402	99	0.18692084	0.231322204	1	74.4810094
M13587	6B	676372364	0.028332822	0.463917526	99	0.18692084	0.231296724	1	63.07047595
M11784	5B	682399214	0.028341599	0.051546392	99	0.18692084	0.231291664	1	-135.0894999
M11076	5B	592867962	0.028343461	0.371134021	99	0.18692084	0.231290591	1	88.03163398
M9935	5A	79280510	0.02857072	0.113402062	99	0.18692084	0.231160167	1	91.34939442
M13164	6B	93330869	0.028601895	0.371134021	99	0.18692084	0.231142362	1	-63.23835367
M5109	2B	746974042	0.028883548	0.24742268	99	0.18692084	0.230982424	1	67.81672246
M12673	6A	125507757	0.02892059	0.134020619	99	0.18692084	0.230961512	1	-79.86277221
M313	1A	562808063	0.029186535	0.350515464	99	0.18692084	0.230812206	1	204.3040851
M5581	2D	312751968	0.029186535	0.350515464	99	0.18692084	0.230812206	1	204.3040851
M11768	5B	683514701	0.029216754	0.309278351	99	0.18692084	0.230795332	1	73.99632242
M9799	4D	482953875	0.029273591	0.164948454	99	0.18692084	0.230763645	1	-84.08786313
M10968	5B	393940604	0.029342953	0.340206186	99	0.18692084	0.230725064	1	62.4607242
M4557	2B	51589506	0.029364682	0.319587629	99	0.18692084	0.230712997	1	71.88983159
M1788	1B	608599570	0.029407493	0.309278351	99	0.18692084	0.23068925	1	136.2817264
M1668	1B	615019866	0.029414912	0.463917526	99	0.18692084	0.230685139	1	76.84110598
M4975	2B	675190488	0.029475015	0.319587629	99	0.18692084	0.230651872	1	137.9364601
M2510	2A	51108076	0.029536841	0.412371134	99	0.18692084	0.230617727	1	68.07319576
M15458	7B	0	0.029572264	0.268041237	99	0.18692084	0.230598197	1	-68.68779159
M10747	5B	228277789	0.029588137	0.175257732	99	0.18692084	0.230589454	1	-65.77665588
M4604	2B	688434312	0.029599259	0.484536082	99	0.18692084	0.230583331	1	-58.6101335
M6565	3A	651997752	0.029718121	0.360824742	99	0.18692084	0.230518044	1	80.47360696
M11789	5B	687326007	0.029891457	0.381443299	99	0.18692084	0.230423331	1	-124.9666002
M10876	5B	524047080	0.029965531	0.288659794	99	0.18692084	0.230383034	1	80.95860417
M11119	5B	540054438	0.029973172	0.020618557	99	0.18692084	0.230378882	1	193.8441352
M3650	2B	46670271	0.029973172	0.020618557	99	0.18692084	0.230378882	1	193.8441352
M5197	2B	647814104	0.03006114	0.051546392	99	0.18692084	0.230331177	1	-131.6977667
M3741	2B	48838344	0.030155697	0.360824742	99	0.18692084	0.230280062	1	-118.0607261
M2501	2A	36404881	0.030210434	0.402061856	99	0.18692084	0.230250551	1	102.6920846
M4508	2B	690747730	0.030257459	0.340206186	99	0.18692084	0.230225243	1	-65.49754303
M4933	2B	746932893	0.030346069	0.422680412	99	0.18692084	0.230177668	1	65.07220458
M6575	3A	660003685	0.030366991	0.453608247	99	0.18692084	0.230166456	1	81.56419986
M2163	1D	426987465	0.030614423	0.402061856	99	0.18692084	0.230034481	1	-94.91887283
M911	1B	137436650	0.030622907	0.350515464	99	0.18692084	0.230029976	1	-195.4927185
M803	1B	19233594	0.030622907	0.350515464	99	0.18692084	0.230029976	1	195.4927185
M1560	1B	685243263	0.030706635	0.051546392	99	0.18692084	0.229985587	1	141.954096
M3651	2B	53458522	0.030754563	0.453608247	99	0.18692084	0.229960235	1	60.22863398
M14718	7A	90552202	0.030903438	0.298969072	99	0.18692084	0.229881754	1	-64.54307777
M7526	3B	536049099	0.030954321	0.103092784	99	0.18692084	0.229855022	1	-86.34747608
M14365	7A	20403281	0.030971347	0.072164948	99	0.18692084	0.229846088	1	-107.815776
M14543	7A	69893167	0.030979439	0.144329897	99	0.18692084	0.229841844	1	75.34359271
M4073	2B	236592763	0.030985178	0.24742268	99	0.18692084	0.229838834	1	94.90903459
M13906	6D	10735296	0.030987929	0.463917526	99	0.18692084	0.229837391	1	58.87170862
M1925	1B	687334524	0.031050281	0.319587629	99	0.18692084	0.229804736	1	71.42363113
M1557	1B	564574859	0.031087893	0.422680412	99	0.18692084	0.229785071	1	-79.62445818
M14383	7A	0	0.031117635	0.340206186	99	0.18692084	0.229769539	1	-254.6677939
M14415	7A	33761756	0.031117635	0.340206186	99	0.18692084	0.229769539	1	-254.6677939
M14327	7A	0	0.031117635	0.340206186	99	0.18692084	0.229769539	1	254.6677939
M9200	4A	50748255	0.031214032	0.010309278	99	0.18692084	0.229719305	1	-225.8531126
M10777	5B	398715853	0.031294665	0.402061856	99	0.18692084	0.229677412	1	-74.69942998
M15381	7B	470836213	0.031425857	0.164948454	99	0.18692084	0.229609496	1	-88.23171383
M9755	4D	220375714	0.031457524	0.402061856	99	0.18692084	0.229593148	1	-124.4758818
M3755	2B	392096989	0.031494649	0.432989691	99	0.18692084	0.229574004	1	-96.79029334
M7303	3B	538369580	0.031560671	0.06185567	99	0.18692084	0.229540018	1	104.1075576
M12488	6A	358607782	0.031567707	0.072164948	99	0.18692084	0.229536401	1	111.8790481
M6665	3A	701939041	0.031628725	0.412371134	99	0.18692084	0.229505066	1	127.5592575
M5509	2D	0	0.031643374	0.164948454	99	0.18692084	0.229497552	1	-87.7018646
M3492	2B	22617958	0.031743534	0.494845361	99	0.18692084	0.22944628	1	57.24859922
M4245	2B	165245434	0.03195872	0.134020619	99	0.18692084	0.229336705	1	83.66895405
M10944	5B	576920050	0.032017614	0.412371134	99	0.18692084	0.229306852	1	78.12533426
M5129	2B	221893152	0.032090251	0.278350515	99	0.18692084	0.229270113	1	-57.9562464
M6892	3B	7791132	0.03209954	0.18556701	99	0.18692084	0.229265421	1	66.0105673
M13382	6B	449771887	0.032141691	0.24742268	99	0.18692084	0.229244148	1	62.77871789
M3793	2B	96381383	0.03218262	0.164948454	99	0.18692084	0.229223521	1	-86.52106851
M7250	3B	38671387	0.032242259	0.226804124	99	0.18692084	0.229193514	1	78.28861844
M14511	7A	56245466	0.032323193	0.268041237	99	0.18692084	0.229152887	1	-73.20016318
M11147	5B	529048297	0.032342898	0.257731959	99	0.18692084	0.229143012	1	-69.23969601
M1475	1B	544133182	0.032429691	0.432989691	99	0.18692084	0.229099592	1	-61.63430223
M13569	6B	572539293	0.032551693	0.18556701	99	0.18692084	0.229038766	1	-78.61187287
M3723	2B	149684945	0.032621082	0.371134021	99	0.18692084	0.229004279	1	-148.6236542
M4135	2B	347472378	0.032621082	0.371134021	99	0.18692084	0.229004279	1	-148.6236542
M7434	3B	199675977	0.032726656	0.103092784	99	0.18692084	0.228951957	1	-90.83438286
M10196	5A	503430449	0.032801059	0.391752577	99	0.18692084	0.228915192	1	60.0862098
M6360	3A	480442075	0.032860532	0.432989691	99	0.18692084	0.228885867	1	-75.81054586
M4209	2B	144565791	0.033016823	0.24742268	99	0.18692084	0.228809072	1	-72.73344334
M10969	5B	472662963	0.033109571	0.484536082	99	0.18692084	0.228763682	1	94.26885964
M15285	7B	115401524	0.033215731	0.144329897	99	0.18692084	0.228711894	1	79.70939262
M704	1B	3572450	0.03323354	0.484536082	99	0.18692084	0.228703223	1	-70.99215923
M9325	4A	650837952	0.033249212	0.134020619	99	0.18692084	0.228695598	1	-83.75911001
M4078	2B	296004626	0.033254911	0.041237113	99	0.18692084	0.228692825	1	147.7963925
M5746	2D	601206508	0.033469942	0.319587629	99	0.18692084	0.228588594	1	-91.37819262
M4676	2B	595508003	0.033555974	0.484536082	99	0.18692084	0.228547092	1	-61.75064672
M3560	2B	0	0.033584557	0.474226804	99	0.18692084	0.228533329	1	59.88387178
M4742	2B	730086784	0.033638997	0.195876289	99	0.18692084	0.228507148	1	-65.4947485
M12999	6B	14333860	0.033746935	0.371134021	99	0.18692084	0.228455374	1	72.389638
M14797	7A	626324494	0.03388353	0.051546392	99	0.18692084	0.228390106	1	-131.7210028
M5057	2B	764073687	0.034328773	0.278350515	99	0.18692084	0.228179287	1	76.73206207
M5338	2B	789493633	0.034609906	0.030927835	99	0.18692084	0.228047667	1	135.400589
M10731	5B	264879872	0.034800433	0.103092784	99	0.18692084	0.227959111	1	-95.16930707
M2080	1D	40222148	0.035216846	0.360824742	99	0.18692084	0.22776735	1	-81.57186969
M14544	7A	69893167	0.035244454	0.463917526	99	0.18692084	0.227754722	1	72.62962704
M4006	2B	231660916	0.035258115	0.18556701	99	0.18692084	0.227748477	1	74.47701895
M5265	2B	31477695	0.035373563	0.175257732	99	0.18692084	0.227695806	1	74.14111325
M9426	4A	1736032	0.035454005	0.340206186	99	0.18692084	0.227659213	1	68.05447215
M9922	5A	39746104	0.035469345	0.474226804	99	0.18692084	0.227652245	1	-74.61292416
M13905	6D	10735296	0.035476726	0.329896907	99	0.18692084	0.227648893	1	76.95552209
M3930	2B	144247105	0.035508661	0.103092784	99	0.18692084	0.227634401	1	-90.90684424
M13290	6B	230607608	0.035592752	0.288659794	99	0.18692084	0.227596306	1	-73.75604879
M628	1A	577986626	0.035612837	0.463917526	99	0.18692084	0.22758722	1	-55.63276905
M5562	2D	432854196	0.035750843	0.103092784	99	0.18692084	0.227524945	1	-81.93098745
M2943	2A	691753703	0.035754561	0.463917526	99	0.18692084	0.227523271	1	-54.73388995
M11536	5B	571473581	0.035778796	0.309278351	99	0.18692084	0.227512362	1	-62.15182018
M1720	1B	629678307	0.035842815	0.474226804	99	0.18692084	0.227483584	1	67.74872798
M14778	7A	597566121	0.03586086	0.051546392	99	0.18692084	0.227475482	1	-120.7692792
M7415	3B	275636381	0.03586086	0.051546392	99	0.18692084	0.227475482	1	-120.7692792
M7898	3B	745290131	0.03586086	0.051546392	99	0.18692084	0.227475482	1	-120.7692792
M6143	3A	20335431	0.035989798	0.18556701	99	0.18692084	0.227417719	1	78.59404252
M3297	2A	31477695	0.036100583	0.257731959	99	0.18692084	0.227368264	1	55.27204965
M1778	1B	642986028	0.036248995	0.12371134	99	0.18692084	0.227302264	1	74.66328235
M15465	7B	592345454	0.036266041	0.371134021	99	0.18692084	0.227294702	1	66.14197395
M13390	6B	263724280	0.036442976	0.463917526	99	0.18692084	0.227216432	1	-88.90718914
M4186	2B	704118285	0.036444072	0.412371134	99	0.18692084	0.227215949	1	-80.46163088
M4784	2B	733180507	0.036447384	0.412371134	99	0.18692084	0.227214487	1	83.35672576
M1232	1B	86102631	0.036471078	0.257731959	99	0.18692084	0.227204038	1	85.59067256
M11793	5B	656472011	0.036568442	0.041237113	99	0.18692084	0.227161176	1	-139.4191506
M11744	5B	680852435	0.036568442	0.041237113	99	0.18692084	0.227161176	1	139.4191506
M11776	5B	684700913	0.036568442	0.041237113	99	0.18692084	0.227161176	1	139.4191506
M5852	2D	613237565	0.036764575	0.360824742	99	0.18692084	0.227075201	1	-64.92325507
M1859	1B	478429415	0.036784999	0.329896907	99	0.18692084	0.227066276	1	62.69668188
M6589	3A	174036118	0.036804006	0.319587629	99	0.18692084	0.227057975	1	76.70900026
M6528	3A	639700048	0.036829368	0.268041237	99	0.18692084	0.227046906	1	74.15098757
M10684	5B	0	0.03695526	0.350515464	99	0.18692084	0.226992081	1	164.2313478
M14473	7A	49648308	0.03695526	0.350515464	99	0.18692084	0.226992081	1	164.2313478
M14529	7A	62883363	0.03695526	0.350515464	99	0.18692084	0.226992081	1	164.2313478
M2535	2A	45084253	0.03695526	0.350515464	99	0.18692084	0.226992081	1	164.2313478
M10748	5B	228277789	0.036959286	0.319587629	99	0.18692084	0.226990331	1	124.5780047
M6142	3A	538313651	0.036970022	0.494845361	99	0.18692084	0.226985666	1	-72.5814432
M3193	2A	66819913	0.037000068	0.371134021	99	0.18692084	0.226972616	1	69.55498929
M9825	5A	0	0.037089665	0.412371134	99	0.18692084	0.226933769	1	70.31459594
M10611	5B	316546278	0.037134173	0.494845361	99	0.18692084	0.226914508	1	87.82340513
M3653	2B	53458522	0.037212505	0.453608247	99	0.18692084	0.22688067	1	-60.89330616
M5278	2B	0	0.037234528	0.113402062	99	0.18692084	0.22687117	1	93.13866101
M7335	3B	65705367	0.037263717	0.443298969	99	0.18692084	0.226858589	1	76.23576367
M3340	2A	766578300	0.037275269	0.06185567	99	0.18692084	0.226853612	1	-92.14343148
M5948	2D	651419153	0.037314193	0.237113402	99	0.18692084	0.226836856	1	-82.22669938
M9803	4D	675631336	0.037470586	0.278350515	99	0.18692084	0.226769719	1	58.15072729
M12515	6A	143013871	0.03765332	0.381443299	99	0.18692084	0.226691652	1	117.8379437
M7433	3B	199675977	0.037711843	0.494845361	99	0.18692084	0.226666736	1	56.60633576
M9540	4B	551047829	0.037742296	0.391752577	99	0.18692084	0.226653786	1	-110.4614824
M5111	2B	450656765	0.037752712	0.412371134	99	0.18692084	0.22664936	1	88.18283972
M14502	7A	62750954	0.037830637	0.340206186	99	0.18692084	0.226616285	1	-103.9436765
M9955	5A	52357838	0.037839623	0.24742268	99	0.18692084	0.226612476	1	-72.5330225
M7131	3B	24940760	0.037887628	0.144329897	99	0.18692084	0.226592141	1	74.33418564
M3057	2A	729494667	0.037918684	0.463917526	99	0.18692084	0.226579001	1	68.87766903
M906	1B	210395910	0.037932946	0.422680412	99	0.18692084	0.22657297	1	-61.46585738
M5964	2D	57217895	0.03793477	0.154639175	99	0.18692084	0.226572199	1	70.58058133
M1009	1B	39514123	0.037951486	0.020618557	99	0.18692084	0.226565135	1	200.2635579
M1224	1B	0	0.037951486	0.020618557	99	0.18692084	0.226565135	1	200.2635579
M6851	3A	726993854	0.038069546	0.474226804	99	0.18692084	0.226515332	1	49.36378612
M5915	2D	606198497	0.038172276	0.144329897	99	0.18692084	0.22647213	1	-76.86499083
M3130	2A	751661898	0.038245189	0.154639175	99	0.18692084	0.226441543	1	76.06978412
M9435	4A	0	0.038291968	0.340206186	99	0.18692084	0.226421952	1	72.91417918
M10707	5B	119188411	0.038382359	0.030927835	99	0.18692084	0.226384168	1	137.8912181
M1954	1B	260327837	0.038439053	0.195876289	99	0.18692084	0.226360518	1	60.71076733
M7694	3B	684619731	0.038461409	0.134020619	99	0.18692084	0.226351202	1	76.18770272
M1926	1B	687334524	0.038487443	0.134020619	99	0.18692084	0.226340361	1	-79.51972722
M4846	2B	0	0.038579301	0.113402062	99	0.18692084	0.226302173	1	-91.37220676
M12127	6A	2136438	0.038693893	0.443298969	99	0.18692084	0.226254669	1	83.1407015
M6163	3A	403940047	0.038761775	0.350515464	99	0.18692084	0.226226599	1	-65.21203828
M792	1B	179842147	0.038800593	0.494845361	99	0.18692084	0.226210572	1	-68.03992962
M12049	6A	5124270	0.0388674	0.195876289	99	0.18692084	0.226183027	1	-81.60168024
M6073	3A	13376403	0.038895591	0.412371134	99	0.18692084	0.226171419	1	91.22132102
M4612	2B	0	0.039048954	0.340206186	99	0.18692084	0.226108427	1	53.61200779
M8257	3D	6677623	0.03910159	0.092783505	99	0.18692084	0.226086869	1	76.33143827
M1618	1B	628627682	0.039258203	0.474226804	99	0.18692084	0.226022905	1	67.65892625
M1901	1B	602910762	0.039265558	0.463917526	99	0.18692084	0.226019908	1	66.73743333
M6341	3A	108025232	0.039334278	0.103092784	99	0.18692084	0.225991934	1	-77.25995347
M12378	6A	64324098	0.039353936	0.298969072	99	0.18692084	0.225983941	1	63.88610537
M12964	6B	0	0.039555719	0.175257732	99	0.18692084	0.225902143	1	69.76537844
M834	1B	21523277	0.039573546	0.237113402	99	0.18692084	0.225894938	1	-62.05974209
M6481	3A	568024952	0.039612251	0.422680412	99	0.18692084	0.225879306	1	-88.0507916
M10510	5A	680512404	0.039685076	0.175257732	99	0.18692084	0.225849939	1	-84.90120802
M4188	2B	374802883	0.039690265	0.422680412	99	0.18692084	0.225847848	1	80.43998846
M3022	2A	717007485	0.039810568	0.268041237	99	0.18692084	0.225799468	1	59.69518388
M4934	2B	746932893	0.039868531	0.412371134	99	0.18692084	0.225776213	1	-60.76271889
M1231	1B	86102631	0.039990015	0.288659794	99	0.18692084	0.225727591	1	-59.68973998
M1317	1B	505491281	0.040065914	0.402061856	99	0.18692084	0.225697294	1	64.12437221
M13070	6B	17658870	0.040164116	0.154639175	99	0.18692084	0.225658185	1	-76.94400982
M7239	3B	42562343	0.040184416	0.371134021	99	0.18692084	0.225650113	1	-70.96524183
M14387	7A	702331405	0.040207772	0.484536082	99	0.18692084	0.225640832	1	86.55287572
M6042	3A	0	0.040208006	0.24742268	99	0.18692084	0.225640739	1	-68.23176964
M6540	3A	662527377	0.040355853	0.288659794	99	0.18692084	0.225582119	1	-57.56196305
M14510	7A	56245466	0.040370737	0.24742268	99	0.18692084	0.22557623	1	-55.85173414
M11700	5B	626337103	0.040411253	0.360824742	99	0.18692084	0.225560212	1	101.7567082
M4435	2B	620850327	0.0404117	0.24742268	99	0.18692084	0.225560036	1	-64.40582947
M6490	3A	568024769	0.040479294	0.340206186	99	0.18692084	0.225533351	1	74.53775643
M15118	7A	0	0.040691878	0.402061856	99	0.18692084	0.225449738	1	60.73068423
M927	1B	198637739	0.040719498	0.216494845	99	0.18692084	0.225438909	1	-90.43217651
M10847	5B	420193748	0.040726144	0.288659794	99	0.18692084	0.225436304	1	91.60371366
M7411	3B	379344423	0.040777084	0.030927835	99	0.18692084	0.225416355	1	-155.5973545
M11550	5B	563543624	0.040783978	0.432989691	99	0.18692084	0.225413657	1	58.45979076
M5409	2D	20358088	0.040792811	0.257731959	99	0.18692084	0.225410202	1	-67.42117021
M14368	7A	20403281	0.040841398	0.340206186	99	0.18692084	0.225391207	1	-101.3946444
M5054	2B	0	0.040992239	0.474226804	99	0.18692084	0.225332392	1	-108.8069705
M11521	5B	563781408	0.041013101	0.484536082	99	0.18692084	0.225324276	1	-77.56654974
M10127	5A	461008994	0.04102155	0.020618557	99	0.18692084	0.22532099	1	182.4550378
M3600	2B	298962243	0.04102155	0.020618557	99	0.18692084	0.22532099	1	182.4550378
M3760	2B	434731139	0.04102155	0.020618557	99	0.18692084	0.22532099	1	182.4550378
M9099	4A	220162554	0.04102155	0.020618557	99	0.18692084	0.22532099	1	182.4550378
M9125	4A	236257343	0.04102155	0.020618557	99	0.18692084	0.22532099	1	182.4550378
M9130	4A	702149172	0.04102155	0.020618557	99	0.18692084	0.22532099	1	182.4550378
M9066	4A	590854832	0.04102155	0.020618557	99	0.18692084	0.22532099	1	-182.4550378
M9079	4A	692084397	0.04102155	0.020618557	99	0.18692084	0.22532099	1	-182.4550378
M9086	4A	690887990	0.04102155	0.020618557	99	0.18692084	0.22532099	1	-182.4550378
M9132	4A	236257089	0.04102155	0.020618557	99	0.18692084	0.22532099	1	-182.4550378
M14121	6D	471828189	0.041204008	0.484536082	99	0.18692084	0.225250209	1	-59.55149102
M11859	5B	703899766	0.041318613	0.474226804	99	0.18692084	0.225205921	1	83.27677049
M849	1B	207966086	0.041464439	0.422680412	99	0.18692084	0.225149758	1	-79.09803153
M7985	3B	760719226	0.041540967	0.030927835	99	0.18692084	0.225120368	1	-143.2323269
M8090	3B	795540049	0.041570492	0.443298969	99	0.18692084	0.225109045	1	84.22817054
M13565	6B	438806491	0.041629225	0.432989691	99	0.18692084	0.225086546	1	57.95183685
M12004	5D	552729543	0.041639797	0.474226804	99	0.18692084	0.2250825	1	55.96853177
M1619	1B	603262258	0.041731602	0.494845361	99	0.18692084	0.225047409	1	77.7142033
M7160	3B	27998611	0.041865893	0.268041237	99	0.18692084	0.224996227	1	-77.70347876
M1229	1B	445449025	0.041877446	0.412371134	99	0.18692084	0.224991832	1	66.13004094
M9121	4A	701045149	0.041943076	0.360824742	99	0.18692084	0.22496689	1	-154.7178512
M9118	4A	25288905	0.041943076	0.360824742	99	0.18692084	0.22496689	1	154.7178512
M4223	2B	208215441	0.041961571	0.268041237	99	0.18692084	0.224959869	1	-74.97662735
M14862	7A	679816918	0.042009859	0.134020619	99	0.18692084	0.224941553	1	83.66698008
M1719	1B	629678307	0.042065557	0.371134021	99	0.18692084	0.224920454	1	-63.23671303
M13793	6B	467011945	0.042077966	0.24742268	99	0.18692084	0.224915757	1	-69.80476315
M5573	2D	476041769	0.042223295	0.06185567	99	0.18692084	0.224860863	1	-96.56194734
M2102	1D	270824622	0.042383883	0.309278351	99	0.18692084	0.22480044	1	72.94901982
M14376	7A	25877101	0.042429375	0.309278351	99	0.18692084	0.224783367	1	85.14630862
M12126	6A	5129543	0.042516404	0.494845361	99	0.18692084	0.224750761	1	60.25539841
M13640	6B	696194020	0.042629115	0.443298969	99	0.18692084	0.224708639	1	-56.62240718
M12050	6A	5124270	0.042808191	0.041237113	99	0.18692084	0.22464196	1	126.4983913
M7052	3B	447667963	0.042883926	0.06185567	99	0.18692084	0.224613849	1	-118.840693
M10954	5B	518835133	0.043019997	0.463917526	99	0.18692084	0.224563478	1	-59.13506236
M9804	4D	675631336	0.043091601	0.18556701	99	0.18692084	0.224537039	1	-72.78603408
M6574	3A	417553440	0.043388358	0.432989691	99	0.18692084	0.224427967	1	70.96069515
M13003	6B	17701756	0.043401847	0.381443299	99	0.18692084	0.224423028	1	-115.0120055
M12734	6A	594854466	0.043409408	0.319587629	99	0.18692084	0.22442026	1	65.66530604
M13529	6B	655890375	0.043539801	0.237113402	99	0.18692084	0.224372611	1	94.13137298
M858	1B	36034202	0.04372611	0.288659794	99	0.18692084	0.224304794	1	-74.46515509
M5720	2D	0	0.043915963	0.494845361	99	0.18692084	0.224236004	1	88.10274458
M6590	3A	174036118	0.043929695	0.360824742	99	0.18692084	0.224231041	1	73.65135041
M7496	3B	335094862	0.044129033	0.216494845	99	0.18692084	0.224159181	1	-67.20238637
M5580	2D	420567713	0.044211527	0.020618557	99	0.18692084	0.224129544	1	192.2673724
M5930	2D	619962487	0.044231813	0.463917526	99	0.18692084	0.224122265	1	75.16075314
M1704	1B	622071195	0.044268743	0.298969072	99	0.18692084	0.224109023	1	-59.09966583
M4185	2B	704118285	0.044432822	0.402061856	99	0.18692084	0.224050332	1	109.7304605
M15161	7B	673044	0.044455453	0.144329897	99	0.18692084	0.224042255	1	-73.51205821
M15020	7A	712493182	0.044469375	0.206185567	99	0.18692084	0.224037289	1	68.7462038
M2926	2A	48402596	0.04460299	0.134020619	99	0.18692084	0.223989709	1	80.62785312
M12040	6A	49592914	0.04469844	0.164948454	99	0.18692084	0.223955812	1	-77.81793823
M2989	2A	715223908	0.044744828	0.350515464	99	0.18692084	0.223939366	1	-59.41875285
M4758	2B	0	0.044808751	0.24742268	99	0.18692084	0.223916734	1	-63.96789695
M15388	7B	446996734	0.044844604	0.103092784	99	0.18692084	0.223904056	1	90.61579215
M3927	2B	180555363	0.044929004	0.319587629	99	0.18692084	0.223874252	1	-75.91236203
M3220	2A	0	0.045007951	0.340206186	99	0.18692084	0.223846429	1	238.4788803
M8151	3B	818871534	0.045007951	0.340206186	99	0.18692084	0.223846429	1	-238.4788803
M13340	6B	239326408	0.045145666	0.412371134	99	0.18692084	0.223798018	1	-86.10944115
M851	1B	0	0.04520147	0.319587629	99	0.18692084	0.223778447	1	-56.23243097
M181	1A	344675281	0.045219053	0.412371134	99	0.18692084	0.223772286	1	-57.86587951
M10757	5B	429171723	0.045232737	0.051546392	99	0.18692084	0.223767492	1	99.81845774
M3353	2A	766445675	0.045232803	0.350515464	99	0.18692084	0.223767469	1	-184.8649094
M3887	2B	0	0.045232803	0.350515464	99	0.18692084	0.223767469	1	-184.8649094
M9734	4D	16502547	0.045257709	0.24742268	99	0.18692084	0.223758749	1	-92.78782001
M796	1B	30846941	0.045289067	0.381443299	99	0.18692084	0.223747777	1	65.5512117
M8075	3B	590943948	0.045304851	0.391752577	99	0.18692084	0.223742257	1	68.52111148
M10570	5B	13171598	0.045320227	0.24742268	99	0.18692084	0.223736882	1	67.77249963
M9757	4D	336833285	0.045348096	0.484536082	99	0.18692084	0.223727145	1	-72.62685228
M9298	4A	718920407	0.045363701	0.257731959	99	0.18692084	0.223721696	1	-75.46557522
M8969	4A	649885889	0.045378923	0.422680412	99	0.18692084	0.223716382	1	56.35105432
M12466	6A	113174438	0.045467573	0.082474227	99	0.18692084	0.223685474	1	91.75326103
M1787	1B	608599570	0.045525413	0.041237113	99	0.18692084	0.223665343	1	-120.8637872
M284	1A	403145168	0.045650687	0.06185567	99	0.18692084	0.223621835	1	92.93059285
M7245	3B	0	0.045725797	0.24742268	99	0.18692084	0.223595811	1	-69.19353219
M10649	5B	8959204	0.045783472	0.164948454	99	0.18692084	0.223575858	1	-88.27632875
M9212	4A	9824444	0.045889672	0.103092784	99	0.18692084	0.223539189	1	-85.31836114
M9058	4A	687328692	0.046066349	0.412371134	99	0.18692084	0.223478387	1	-89.15596177
M4987	2B	23162815	0.046100573	0.371134021	99	0.18692084	0.223466638	1	102.1749221
M7281	3B	48788274	0.046181539	0.340206186	99	0.18692084	0.22343888	1	69.05447546
M11786	5B	686537919	0.04632525	0.195876289	99	0.18692084	0.223389738	1	-70.15411952
M10984	5B	476248249	0.046339778	0.422680412	99	0.18692084	0.223384779	1	71.24959743
M5873	2D	601406100	0.046369858	0.144329897	99	0.18692084	0.223374518	1	80.01805224
M14408	7A	31106605	0.046382553	0.494845361	99	0.18692084	0.223370189	1	105.63441
M936	1B	17537164	0.046398324	0.278350515	99	0.18692084	0.223364814	1	60.76085527
M12291	6A	17317261	0.046436405	0.381443299	99	0.18692084	0.223351841	1	76.92589554
M1146	1B	37570116	0.046487455	0.175257732	99	0.18692084	0.223334469	1	73.28632897
M4856	2B	746141190	0.0465344	0.175257732	99	0.18692084	0.223318511	1	-75.30635619
M14813	7A	635682971	0.046544564	0.484536082	99	0.18692084	0.223315059	1	-79.82008426
M14474	7A	49648308	0.046558193	0.12371134	99	0.18692084	0.223310431	1	105.8669575
M6644	3A	420552380	0.046639894	0.340206186	99	0.18692084	0.223282715	1	-59.23751144
M14422	7A	35630453	0.046694952	0.474226804	99	0.18692084	0.223264068	1	-100.7655553
M10288	5A	0	0.046924171	0.041237113	99	0.18692084	0.223186686	1	-105.092665
M5527	2D	588540369	0.046956167	0.443298969	99	0.18692084	0.223175917	1	75.51193653
M1808	1B	500473353	0.046978524	0.206185567	99	0.18692084	0.223168396	1	63.98463533
M3414	2B	6525683	0.04703145	0.216494845	99	0.18692084	0.223150609	1	74.00189577
M13889	6D	6268088	0.047170007	0.494845361	99	0.18692084	0.223104144	1	-64.61153592
M9297	4A	718920407	0.04720034	0.268041237	99	0.18692084	0.223093991	1	69.11227964
M6561	3A	655669429	0.047312039	0.340206186	99	0.18692084	0.223056665	1	65.33952477
M15048	7A	714340795	0.047346856	0.422680412	99	0.18692084	0.22304505	1	56.0309757
M12058	6A	7901769	0.047359353	0.268041237	99	0.18692084	0.223040883	1	61.51355381
M9077	4A	691165574	0.047361258	0.288659794	99	0.18692084	0.223040248	1	150.5698915
M11840	5B	621241019	0.047382829	0.288659794	99	0.18692084	0.223033059	1	-80.05450109
M9929	5A	81414626	0.047387767	0.371134021	99	0.18692084	0.223031413	1	-51.16959248
M7467	3B	179536207	0.047436814	0.144329897	99	0.18692084	0.223015081	1	-74.0776071
M14670	7A	148468027	0.047594403	0.463917526	99	0.18692084	0.222962729	1	71.35884197
M7293	3B	50790384	0.047699015	0.195876289	99	0.18692084	0.222928079	1	-71.03459118
M5124	2B	777295189	0.047713134	0.402061856	99	0.18692084	0.222923409	1	-102.0981692
M15384	7B	451187047	0.047862902	0.020618557	99	0.18692084	0.222873959	1	180.4806467
M2140	1D	688816452	0.047862902	0.020618557	99	0.18692084	0.222873959	1	180.4806467
M15430	7B	535456944	0.047862902	0.020618557	99	0.18692084	0.222873959	1	-180.4806467
M4329	2B	361487889	0.048232574	0.381443299	99	0.18692084	0.22275261	1	55.9472241
M6057	3A	8862385	0.048316922	0.195876289	99	0.18692084	0.222725062	1	-63.37636746
M9447	4B	4892979	0.048397154	0.494845361	99	0.18692084	0.222698906	1	91.64638656
M2770	2A	153448420	0.048445165	0.216494845	99	0.18692084	0.222683277	1	74.98844479
M6564	3A	650055169	0.048494074	0.092783505	99	0.18692084	0.222667372	1	-100.139621
M14135	7A	4013265	0.048613683	0.422680412	99	0.18692084	0.222628549	1	52.59599239
M7130	3B	25803087	0.048714762	0.257731959	99	0.18692084	0.222595821	1	66.38104715
M2713	2A	133353425	0.048780596	0.463917526	99	0.18692084	0.222574543	1	-121.4606508
M3898	2B	137802366	0.048783538	0.164948454	99	0.18692084	0.222573593	1	-76.41250031
M9920	5A	40170718	0.048863519	0.206185567	99	0.18692084	0.222547786	1	-59.58873645
M14389	7A	29550908	0.048897694	0.494845361	99	0.18692084	0.222536774	1	58.75219429
M12624	6A	552763700	0.048937967	0.329896907	99	0.18692084	0.222523806	1	-111.4216656
M9311	4A	0	0.049021108	0.309278351	99	0.18692084	0.222497072	1	-73.81157113
M2015	1D	13713162	0.049078578	0.432989691	99	0.18692084	0.22247862	1	67.65617694
M1048	1B	106960955	0.049146836	0.144329897	99	0.18692084	0.222456736	1	88.52417289
M13344	6B	355137498	0.04916823	0.443298969	99	0.18692084	0.222449883	1	67.08374739
M9072	4A	689130935	0.049442388	0.020618557	99	0.18692084	0.222362352	1	167.4680354
M4613	2B	91473909	0.049453157	0.164948454	99	0.18692084	0.222358925	1	-69.9790724
M3624	2B	24266934	0.049463196	0.020618557	99	0.18692084	0.22235573	1	-155.8331134
M10760	5B	383204555	0.049503594	0.216494845	99	0.18692084	0.222342882	1	-75.83115618
M6369	3A	482936809	0.049504008	0.412371134	99	0.18692084	0.22234275	1	93.06553013
M5320	2B	799056714	0.049588735	0.06185567	99	0.18692084	0.222315841	1	-152.0233262
M11178	5B	0	0.049589096	0.113402062	99	0.18692084	0.222315727	1	-82.72973773
M6651	3A	506259895	0.049775155	0.309278351	99	0.18692084	0.222256807	1	-71.10854564
M10942	5B	450372760	0.049810419	0.381443299	99	0.18692084	0.222245667	1	57.87748772
M5328	2B	643640677	0.049891925	0.18556701	99	0.18692084	0.222219951	1	-70.82477222
M2068	1D	52680610	0.049922573	0.474226804	99	0.18692084	0.222210293	1	-113.5739468
M13110	6B	39809227	0.049948944	0.422680412	99	0.18692084	0.222201987	1	-57.55434345
M9301	4A	0	0.050057393	0.164948454	99	0.18692084	0.222167882	1	-66.26319593
M3855	2B	69509022	0.050067905	0.309278351	99	0.18692084	0.22216458	1	65.80643046
M13858	6D	1372781	0.050197547	0.257731959	99	0.18692084	0.222123923	1	68.70224777
M4065	2B	296109009	0.050248775	0.391752577	99	0.18692084	0.222107889	1	82.75616317
M8706	4A	25985745	0.050283004	0.051546392	99	0.18692084	0.222097185	1	-106.693346
M11489	5B	550320578	0.050335093	0.463917526	99	0.18692084	0.222080911	1	67.34515357
M12019	5D	704165878	0.050457018	0.257731959	99	0.18692084	0.222042889	1	63.18401645
M14532	7A	69893107	0.050616272	0.402061856	99	0.18692084	0.221993375	1	-87.08329567
M14535	7A	65600063	0.050616272	0.402061856	99	0.18692084	0.221993375	1	-87.08329567
M11124	5B	698209017	0.050621011	0.402061856	99	0.18692084	0.221991904	1	71.09659181
M9738	4D	681466316	0.050678825	0.072164948	99	0.18692084	0.221973972	1	-85.62833016
M10750	5B	400097283	0.050705083	0.103092784	99	0.18692084	0.221965835	1	91.79800888
M636	1A	578785363	0.050942916	0.24742268	99	0.18692084	0.221892338	1	-60.62753674
M13198	6B	0	0.051011794	0.082474227	99	0.18692084	0.221871123	1	96.29007222
M9771	4D	419686606	0.051029079	0.402061856	99	0.18692084	0.221865803	1	-50.74724786
M2115	1D	472550886	0.05105797	0.412371134	99	0.18692084	0.221856917	1	64.17331993
M6427	3A	517095336	0.051067958	0.103092784	99	0.18692084	0.221853846	1	-97.3216281
M4681	2B	706398142	0.051180395	0.484536082	99	0.18692084	0.221819319	1	-50.12135828
M4818	2B	606156145	0.051197878	0.340206186	99	0.18692084	0.221813958	1	64.58170202
M2857	2A	52393884	0.051211225	0.288659794	99	0.18692084	0.221809867	1	67.19744783
M6319	3A	434822187	0.051237641	0.216494845	99	0.18692084	0.221801772	1	-69.56351784
M11996	5D	548844664	0.051250109	0.381443299	99	0.18692084	0.221797953	1	-50.25055703
M5922	2D	695112271	0.051292184	0.432989691	99	0.18692084	0.221785073	1	-88.3440853
M13317	6B	190122609	0.051299711	0.412371134	99	0.18692084	0.22178277	1	-64.75268065
M4930	2B	750017811	0.051358487	0.24742268	99	0.18692084	0.221764799	1	-74.01114659
M9754	4D	80836783	0.051534194	0.402061856	99	0.18692084	0.221711208	1	-134.7251318
M2408	2A	9684465	0.051543075	0.154639175	99	0.18692084	0.221708505	1	-118.2379571
M12982	6B	6682335	0.051704223	0.154639175	99	0.18692084	0.221659536	1	-63.85445664
M10403	5A	600359375	0.051811189	0.226804124	99	0.18692084	0.221627122	1	-58.95386168
M11003	5B	408219618	0.051918388	0.391752577	99	0.18692084	0.22159471	1	-84.04166012
M979	1B	6341226	0.051973728	0.257731959	99	0.18692084	0.221578006	1	-96.57018745
M6556	3A	648107739	0.051992056	0.113402062	99	0.18692084	0.221572478	1	80.47135686
M13375	6B	460540816	0.052056759	0.443298969	99	0.18692084	0.221552979	1	88.6193755
M3899	2B	556366289	0.052130118	0.474226804	99	0.18692084	0.221530904	1	78.84635664
M10411	5A	575237635	0.052218177	0.371134021	99	0.18692084	0.221504448	1	56.37624126
M3339	2A	766578300	0.052526228	0.319587629	99	0.18692084	0.221412279	1	96.59966493
M1338	1B	380472532	0.052618005	0.402061856	99	0.18692084	0.221384932	1	64.8946547
M14393	7A	29138301	0.052630584	0.371134021	99	0.18692084	0.221381188	1	113.5974895
M1045	1B	94011977	0.052651245	0.329896907	99	0.18692084	0.22137504	1	-72.78610033
M3726	2B	72918645	0.052713645	0.041237113	99	0.18692084	0.221356488	1	131.5107237
M4261	2B	553279131	0.052731083	0.494845361	99	0.18692084	0.221351308	1	65.76555068
M7631	3B	437778419	0.052811105	0.072164948	99	0.18692084	0.22132756	1	85.53952201
M11819	5B	212365503	0.052847282	0.175257732	99	0.18692084	0.221316837	1	76.22881651
M10550	5B	17888082	0.052896695	0.432989691	99	0.18692084	0.221302203	1	65.81222765
M3700	2B	568415591	0.052944172	0.391752577	99	0.18692084	0.221288156	1	135.8185009
M3725	2B	72918645	0.052944172	0.391752577	99	0.18692084	0.221288156	1	135.8185009
M3014	2A	706928677	0.052966482	0.494845361	99	0.18692084	0.22128156	1	-65.79491328
M10046	5A	454808313	0.052985595	0.402061856	99	0.18692084	0.221275911	1	104.2553808
M3080	2A	736066326	0.052997359	0.350515464	99	0.18692084	0.221272436	1	57.59467679
M833	1B	21523277	0.053184403	0.329896907	99	0.18692084	0.221217288	1	110.6014235
M6557	3A	657422205	0.053187112	0.134020619	99	0.18692084	0.221216491	1	-74.29046444
M13728	6B	708271328	0.053280575	0.092783505	99	0.18692084	0.221189014	1	-85.66491075
M7387	3B	714302155	0.053363803	0.164948454	99	0.18692084	0.221164589	1	62.31093436
M3673	2B	66667038	0.053442216	0.371134021	99	0.18692084	0.221141616	1	-53.68743342
M759	1B	13027114	0.05349035	0.381443299	99	0.18692084	0.221127531	1	-66.70372305
M11883	5D	6459997	0.053590574	0.041237113	99	0.18692084	0.221098248	1	121.8758467
M9844	5A	6448975	0.053635976	0.371134021	99	0.18692084	0.221085002	1	-64.53740701
M6432	3A	509564298	0.053853035	0.020618557	99	0.18692084	0.221021843	1	-153.135637
M7982	3B	763454895	0.053853035	0.020618557	99	0.18692084	0.221021843	1	153.135637
M12745	6A	609814795	0.053882391	0.494845361	99	0.18692084	0.221013322	1	-63.52393057
M13082	6B	14792085	0.054007909	0.237113402	99	0.18692084	0.220976946	1	75.01415172
M6418	3A	512556910	0.054021032	0.12371134	99	0.18692084	0.220973148	1	85.00901314
M13959	6D	51427536	0.054085039	0.051546392	99	0.18692084	0.220954638	1	-96.75331555
M755	1B	2358221	0.054109322	0.494845361	99	0.18692084	0.220947622	1	85.68553912
M8062	3B	785499330	0.054213418	0.24742268	99	0.18692084	0.220917583	1	57.64824004
M9508	4B	449269878	0.05425026	0.340206186	99	0.18692084	0.220906967	1	50.73006474
M5515	2D	139037649	0.054257559	0.350515464	99	0.18692084	0.220904864	1	-170.9034139
M4792	2B	724734789	0.054421253	0.319587629	99	0.18692084	0.220857795	1	126.6161281
M1628	1B	144111278	0.054559495	0.494845361	99	0.18692084	0.220818163	1	-72.48497788
M3007	2A	683749636	0.054575409	0.463917526	99	0.18692084	0.220813607	1	-47.43375269
M4587	2B	0	0.054646921	0.309278351	99	0.18692084	0.220793155	1	73.13965825
M10619	5B	63922089	0.05464996	0.484536082	99	0.18692084	0.220792286	1	-75.30192842
M135	1A	20866783	0.054874079	0.381443299	99	0.18692084	0.220728378	1	-54.75760205
M2286	1D	0	0.055110958	0.474226804	99	0.18692084	0.220661137	1	69.7175843
M1249	1B	452770206	0.055215781	0.422680412	99	0.18692084	0.220631481	1	75.39681504
M5914	2D	606124230	0.055286985	0.134020619	99	0.18692084	0.220611371	1	85.28736167
M10609	5B	0	0.055354533	0.494845361	99	0.18692084	0.220592319	1	-82.89456476
M5775	2D	590146863	0.055545757	0.494845361	99	0.18692084	0.22053852	1	-66.07255861
M736	1B	716071071	0.0555498	0.113402062	99	0.18692084	0.220537385	1	-72.57411362
M8615	4A	125790560	0.055622121	0.432989691	99	0.18692084	0.220517092	1	-50.0692327
M5262	2B	765884956	0.055638743	0.24742268	99	0.18692084	0.220512432	1	-64.51584579
M6591	3A	174031646	0.055656641	0.329896907	99	0.18692084	0.220507416	1	-67.59875771
M5927	2D	618309251	0.055665802	0.134020619	99	0.18692084	0.220504849	1	-83.16946369
M3643	2B	50713994	0.055805323	0.340206186	99	0.18692084	0.220465814	1	55.81811599
M8668	4A	146943997	0.055812782	0.453608247	99	0.18692084	0.22046373	1	81.5312537
M4796	2B	732056365	0.055839027	0.06185567	99	0.18692084	0.2204564	1	88.84719875
M4068	2B	142668064	0.055854504	0.195876289	99	0.18692084	0.220452079	1	59.13757752
M4144	2B	380453000	0.05586446	0.072164948	99	0.18692084	0.2204493	1	-97.45006021
M32	1A	7078505	0.055920592	0.072164948	99	0.18692084	0.220433643	1	96.96990811
M6079	3A	0	0.056027884	0.412371134	99	0.18692084	0.220403763	1	93.18020198
M5719	2D	0	0.056124762	0.12371134	99	0.18692084	0.220376836	1	70.72672234
M9641	4B	509511919	0.056157974	0.051546392	99	0.18692084	0.220367616	1	113.9975665
M5105	2B	772149581	0.056224592	0.113402062	99	0.18692084	0.220349141	1	-85.0970223
M4404	2B	614349634	0.056372789	0.237113402	99	0.18692084	0.220308125	1	64.59619453
M7283	3B	48788274	0.056497607	0.237113402	99	0.18692084	0.220273671	1	69.30139254
M14294	7A	0	0.056523395	0.360824742	99	0.18692084	0.220266562	1	-135.3366695
M13812	6B	715980875	0.056579034	0.298969072	99	0.18692084	0.220251238	1	-112.0367546
M4067	2B	142668064	0.056628088	0.278350515	99	0.18692084	0.22023774	1	-79.20786276
M14057	6D	682135943	0.056724779	0.24742268	99	0.18692084	0.220211172	1	59.26264648
M5275	2B	792988297	0.05674692	0.216494845	99	0.18692084	0.220205096	1	-78.26683011
M14169	7A	11374457	0.056777294	0.329896907	99	0.18692084	0.220196763	1	-135.6014499
M2961	2A	700374249	0.056799274	0.381443299	99	0.18692084	0.220190737	1	119.0910137
M6586	3A	662913097	0.05687155	0.391752577	99	0.18692084	0.220170937	1	60.62372277
M11985	5D	548463362	0.056885481	0.06185567	99	0.18692084	0.220167124	1	-108.5705159
M447	1A	532487758	0.056899322	0.319587629	99	0.18692084	0.220163337	1	162.9154543
M10116	5A	357980231	0.056935826	0.494845361	99	0.18692084	0.220153352	1	59.02267435
M1697	1B	614393199	0.05698017	0.154639175	99	0.18692084	0.220141233	1	-70.97469319
M6192	3A	312266867	0.057013828	0.103092784	99	0.18692084	0.220132041	1	84.79998895
M10580	5B	0	0.057147934	0.195876289	99	0.18692084	0.220095474	1	-65.5217049
M11114	5B	531194944	0.057236021	0.257731959	99	0.18692084	0.220071506	1	-57.53616076
M7485	3B	495521725	0.057318272	0.051546392	99	0.18692084	0.220049162	1	100.4635502
M848	1B	17621853	0.057413734	0.298969072	99	0.18692084	0.220023272	1	-70.34760854
M797	1B	247051054	0.057509662	0.391752577	99	0.18692084	0.219997302	1	98.30981085
M5022	2B	593348369	0.057576714	0.309278351	99	0.18692084	0.219979178	1	-76.57916906
M9565	4B	607638063	0.057611184	0.453608247	99	0.18692084	0.21996987	1	75.18240818
M4531	2B	673234348	0.057822305	0.216494845	99	0.18692084	0.219912988	1	63.27896554
M11547	5B	332444025	0.058027492	0.309278351	99	0.18692084	0.21985792	1	68.76315417
M9025	4A	685816847	0.05811758	0.257731959	99	0.18692084	0.219833809	1	65.56274538
M13719	6B	0	0.058166769	0.494845361	99	0.18692084	0.219820661	1	-75.9583765
M5130	2B	221893152	0.05817647	0.298969072	99	0.18692084	0.219818069	1	56.81572003
M12553	6A	39131835	0.05822724	0.432989691	99	0.18692084	0.219804514	1	53.00154211
M13251	6B	128193460	0.058251844	0.422680412	99	0.18692084	0.219797949	1	60.42209412
M14180	7A	8931917	0.058328068	0.103092784	99	0.18692084	0.219777631	1	73.40689733
M14343	7A	17252435	0.058402458	0.010309278	99	0.18692084	0.219757829	1	223.4635439
M3920	2B	158649496	0.058402458	0.010309278	99	0.18692084	0.219757829	1	-223.4635439
M581	1A	0	0.058444824	0.195876289	99	0.18692084	0.219746564	1	69.50239366
M6306	3A	52962542	0.058479737	0.391752577	99	0.18692084	0.219737287	1	-93.19064933
M15031	7A	714618306	0.058539791	0.402061856	99	0.18692084	0.219721344	1	50.28150376
M4732	2B	712361439	0.058778514	0.484536082	99	0.18692084	0.219658142	1	62.43320013
M11788	5B	688224445	0.058864357	0.422680412	99	0.18692084	0.219635483	1	-56.83495763
M9151	4A	441240399	0.059049201	0.12371134	99	0.18692084	0.219586812	1	75.9075965
M14571	7A	83070191	0.059267898	0.329896907	99	0.18692084	0.219529441	1	-60.66161966
M9823	5A	1243651	0.059305754	0.494845361	99	0.18692084	0.219519533	1	55.32899696
M14442	7A	36312068	0.059366693	0.051546392	99	0.18692084	0.219503599	1	-93.25848598
M4627	2B	689711741	0.059430515	0.309278351	99	0.18692084	0.219486929	1	53.88041116
M4105	2B	510796274	0.059476971	0.371134021	99	0.18692084	0.219474808	1	-126.526057
M641	1A	580452752	0.059678683	0.443298969	99	0.18692084	0.219422295	1	-69.00599185
M3113	2A	747610057	0.059679377	0.453608247	99	0.18692084	0.219422114	1	-61.00490357
M1115	1B	574486838	0.059722011	0.226804124	99	0.18692084	0.21941104	1	-64.02932199
M5722	2D	0	0.059844301	0.020618557	99	0.18692084	0.219379322	1	-137.3940098
M404	1A	508571576	0.059845935	0.402061856	99	0.18692084	0.219378898	1	-56.60735118
M1268	1B	16380140	0.059852281	0.164948454	99	0.18692084	0.219377254	1	75.02275406
M892	1B	12505139	0.059905268	0.319587629	99	0.18692084	0.219363535	1	-128.8532226
M974	1B	0	0.059932788	0.278350515	99	0.18692084	0.219356415	1	-68.52295571
M681	1A	30141081	0.059948262	0.226804124	99	0.18692084	0.219352413	1	-62.80092349
M14804	7A	634800683	0.060082024	0.06185567	99	0.18692084	0.219317864	1	100.6432574
M10434	5A	490330792	0.06028	0.164948454	99	0.18692084	0.219266882	1	-72.79522979
M11485	5B	197611596	0.060460163	0.298969072	99	0.18692084	0.219220645	1	-81.11281233
M1637	1B	601383349	0.060483242	0.484536082	99	0.18692084	0.219214733	1	59.51544354
M8358	3D	48269637	0.06052079	0.350515464	99	0.18692084	0.219205119	1	65.10484959
M9831	5A	6609542	0.060586006	0.340206186	99	0.18692084	0.219188437	1	-53.81199121
M198	1A	50833300	0.060597174	0.020618557	99	0.18692084	0.219185582	1	-123.955225
M8161	3B	817331152	0.060735062	0.422680412	99	0.18692084	0.219150381	1	-88.12465467
M13461	6B	616311748	0.060831577	0.030927835	99	0.18692084	0.219125793	1	-122.9129152
M13530	6B	655890375	0.060871287	0.103092784	99	0.18692084	0.219115689	1	-77.23992749
M1212	1B	118849938	0.060876521	0.309278351	99	0.18692084	0.219114358	1	-141.873915
M8860	4A	49224781	0.060906652	0.494845361	99	0.18692084	0.219106697	1	57.34797215
M13727	6B	708271328	0.060919698	0.319587629	99	0.18692084	0.219103381	1	61.44649827
M8851	4A	111059555	0.06095284	0.298969072	99	0.18692084	0.219094961	1	-60.56823588
M6391	3A	363608529	0.060983009	0.432989691	99	0.18692084	0.219087301	1	-74.72636699
M8213	3B	823913888	0.060983199	0.288659794	99	0.18692084	0.219087252	1	-72.57561371
M15010	7A	736526737	0.061084123	0.082474227	99	0.18692084	0.219061656	1	94.39130062
M7065	3B	15124529	0.061172308	0.371134021	99	0.18692084	0.219039328	1	-55.79450662
M9399	4A	5381823	0.061192883	0.391752577	99	0.18692084	0.219034123	1	-57.39726722
M3889	2B	110963593	0.061261854	0.453608247	99	0.18692084	0.219016691	1	50.3073753
M6660	3A	699467553	0.061278618	0.391752577	99	0.18692084	0.219012457	1	125.1053003
M3380	2A	612169049	0.06128325	0.350515464	99	0.18692084	0.219011287	1	-53.62884226
M2790	2A	497439858	0.061339212	0.12371134	99	0.18692084	0.218997163	1	-73.16774883
M14654	7A	143134133	0.061362187	0.268041237	99	0.18692084	0.218991369	1	-65.3072727
M5279	2B	549670301	0.061363242	0.216494845	99	0.18692084	0.218991103	1	72.32810872
M6378	3A	45033405	0.061402014	0.402061856	99	0.18692084	0.21898133	1	74.50507038
M1050	1B	111514140	0.061441489	0.082474227	99	0.18692084	0.218971387	1	101.9894931
M7376	3B	79421097	0.061483306	0.072164948	99	0.18692084	0.218960861	1	99.7648719
M2903	2A	502932671	0.061728456	0.412371134	99	0.18692084	0.218899311	1	53.91481256
M14418	7A	33369174	0.061804175	0.350515464	99	0.18692084	0.218880354	1	63.38318469
M1130	1B	75840479	0.061939283	0.309278351	99	0.18692084	0.21884659	1	87.52097264
M14522	7A	56203202	0.062012769	0.164948454	99	0.18692084	0.218828259	1	-55.47541576
M4157	2B	508332601	0.06201629	0.371134021	99	0.18692084	0.218827381	1	125.5388538
M4212	2B	202596151	0.06201629	0.371134021	99	0.18692084	0.218827381	1	-125.5388538
M7461	3B	282944591	0.062054718	0.237113402	99	0.18692084	0.218817806	1	-58.01461342
M3792	2B	77236275	0.062144749	0.092783505	99	0.18692084	0.218795396	1	-79.92153509
M3628	2B	419250140	0.062296683	0.278350515	99	0.18692084	0.218757658	1	62.98892429
M9827	5A	2104451	0.06231297	0.319587629	99	0.18692084	0.218753618	1	-59.35913707
M1841	1B	666942323	0.062528058	0.484536082	99	0.18692084	0.218700379	1	-65.24689612
M4578	2B	0	0.062567244	0.298969072	99	0.18692084	0.218690701	1	-65.96479379
M526	1A	549851141	0.062568488	0.371134021	99	0.18692084	0.218690394	1	-53.55002861
M10732	5B	264879872	0.06260248	0.422680412	99	0.18692084	0.218682004	1	57.33749808
M12775	6A	251320214	0.062602862	0.412371134	99	0.18692084	0.21868191	1	52.27913583
M7279	3B	0	0.06260741	0.319587629	99	0.18692084	0.218680788	1	131.3356469
M2091	1D	612756863	0.06261275	0.226804124	99	0.18692084	0.21867947	1	90.25640966
M731	1B	0	0.062751436	0.288659794	99	0.18692084	0.218645298	1	63.71644195
M7896	3B	211212780	0.062825323	0.319587629	99	0.18692084	0.218627125	1	168.7152586
M11725	5B	664683778	0.062830199	0.391752577	99	0.18692084	0.218625927	1	107.7228913
M11727	5B	665685766	0.062830199	0.391752577	99	0.18692084	0.218625927	1	107.7228913
M9942	5A	52738363	0.062867339	0.030927835	99	0.18692084	0.218616802	1	127.5152194
M12029	5D	561671357	0.062927992	0.494845361	99	0.18692084	0.218601912	1	73.38588134
M9794	4D	403180673	0.063002775	0.278350515	99	0.18692084	0.218583575	1	65.56461342
M4561	2B	306065006	0.063039249	0.06185567	99	0.18692084	0.21857464	1	109.9465186
M9718	4D	3356525	0.06310386	0.12371134	99	0.18692084	0.218558826	1	-79.82324818
M630	1A	481552064	0.063122743	0.268041237	99	0.18692084	0.218554208	1	55.69396572
M12665	6A	194187915	0.063127823	0.268041237	99	0.18692084	0.218552966	1	-66.37056804
M1346	1B	214068731	0.06315071	0.12371134	99	0.18692084	0.218547371	1	-69.48721568
M3180	2A	779809063	0.063176395	0.443298969	99	0.18692084	0.218541094	1	60.13660057
M2656	2A	131906134	0.063178369	0.402061856	99	0.18692084	0.218540612	1	114.4614356
M6562	3A	655669429	0.063268836	0.432989691	99	0.18692084	0.218518527	1	84.8354532
M3933	2B	657506318	0.063279152	0.360824742	99	0.18692084	0.218516011	1	-58.41264621
M14446	7A	37283874	0.063329836	0.154639175	99	0.18692084	0.218503656	1	106.4333709
M14459	7A	46522324	0.063329836	0.154639175	99	0.18692084	0.218503656	1	106.4333709
M14424	7A	35387463	0.063557816	0.463917526	99	0.18692084	0.218448211	1	68.73134008
M10916	5B	452129331	0.063676032	0.164948454	99	0.18692084	0.218419546	1	-63.78504473
M10855	5B	536909476	0.063781013	0.412371134	99	0.18692084	0.218394139	1	-82.61454464
M7569	3B	0	0.063791411	0.484536082	99	0.18692084	0.218391625	1	66.4439175
M14884	7A	674759987	0.063801075	0.020618557	99	0.18692084	0.218389289	1	131.4921858
M6541	3A	501061731	0.063849925	0.175257732	99	0.18692084	0.218377486	1	-57.67793077
M7423	3B	237976322	0.063954305	0.298969072	99	0.18692084	0.218352298	1	67.2285227
M3970	2B	227089235	0.063966421	0.391752577	99	0.18692084	0.218349377	1	74.04770943
M13373	6B	159138986	0.063975797	0.422680412	99	0.18692084	0.218347118	1	92.28816199
M13285	6B	217195685	0.064227925	0.402061856	99	0.18692084	0.218286483	1	-78.04875154
M13336	6B	0	0.064227925	0.402061856	99	0.18692084	0.218286483	1	78.04875154
M2259	1D	471927480	0.064265006	0.474226804	99	0.18692084	0.218277587	1	49.22603263
M9117	4A	25288905	0.064280312	0.030927835	99	0.18692084	0.218273917	1	139.5962192
M12656	6A	512346041	0.064464582	0.422680412	99	0.18692084	0.218229804	1	-56.73997898
M8757	4A	595433064	0.064465697	0.350515464	99	0.18692084	0.218229538	1	-53.68979534
M9391	4A	732814470	0.064509451	0.24742268	99	0.18692084	0.218219083	1	-52.34982026
M9750	4D	95663405	0.064525004	0.092783505	99	0.18692084	0.218215369	1	78.11212264
M1961	1D	585308022	0.064632255	0.381443299	99	0.18692084	0.218189783	1	-64.77667808
M4842	2B	601567299	0.064967026	0.226804124	99	0.18692084	0.218110214	1	-64.52916639
M11716	5B	658542155	0.065100199	0.072164948	99	0.18692084	0.218078685	1	99.59685241
M1291	1B	394858638	0.065122475	0.340206186	99	0.18692084	0.218073418	1	195.7051104
M773	1B	89404769	0.065301924	0.195876289	99	0.18692084	0.218031059	1	64.29037264
M2355	2A	7028915	0.065366027	0.329896907	99	0.18692084	0.218015958	1	-66.63152074
M8921	4A	651777951	0.0655921	0.329896907	99	0.18692084	0.21796283	1	-98.56365895
M4779	2B	730646260	0.065673475	0.030927835	99	0.18692084	0.217943755	1	135.5814985
M7264	3B	47202036	0.065706071	0.268041237	99	0.18692084	0.217936121	1	-60.4450681
M3509	2B	0	0.065789147	0.257731959	99	0.18692084	0.217916685	1	-68.76466382
M14456	7A	38951100	0.065841885	0.402061856	99	0.18692084	0.21790436	1	-67.09630982
M2829	2A	579584012	0.065906841	0.319587629	99	0.18692084	0.217889194	1	-54.42961662
M1199	1B	0	0.065960515	0.319587629	99	0.18692084	0.217876675	1	-96.73779085
M1671	1B	628033554	0.065966068	0.350515464	99	0.18692084	0.21787538	1	-175.2280212
M1056	1B	3440095	0.066015621	0.030927835	99	0.18692084	0.217863833	1	-138.9214416
M4301	2B	586890691	0.066028591	0.402061856	99	0.18692084	0.217860813	1	-80.20159048
M9119	4A	25288905	0.066194177	0.371134021	99	0.18692084	0.217822303	1	-125.775721
M7287	3B	50022030	0.066301788	0.443298969	99	0.18692084	0.217797333	1	-64.07993681
M12568	6A	537944558	0.066330764	0.072164948	99	0.18692084	0.217790617	1	87.73081818
M10679	5B	364697637	0.066334523	0.103092784	99	0.18692084	0.217789745	1	-99.40190691
M10446	5A	591976445	0.066346716	0.24742268	99	0.18692084	0.217786921	1	-59.43719179
M4159	2B	154633225	0.066546061	0.494845361	99	0.18692084	0.217740814	1	73.88171232
M5882	2D	601401117	0.0666654	0.195876289	99	0.18692084	0.217713283	1	-70.74206276
M15338	7B	382617987	0.066763656	0.360824742	99	0.18692084	0.217690657	1	-56.14185683
M455	1A	534938821	0.066764525	0.432989691	99	0.18692084	0.217690457	1	59.11342043
M8462	3D	150762205	0.066803725	0.144329897	99	0.18692084	0.21768144	1	72.51177231
M5050	2B	442156608	0.066881101	0.402061856	99	0.18692084	0.217663659	1	69.36283127
M90	1A	14520409	0.066889652	0.381443299	99	0.18692084	0.217661695	1	-69.62272324
M5595	2D	88591365	0.066905922	0.432989691	99	0.18692084	0.21765796	1	-83.40351351
M3273	2A	769032955	0.066914031	0.391752577	99	0.18692084	0.217656099	1	-58.7268238
M4585	2B	710353117	0.067067094	0.371134021	99	0.18692084	0.217621009	1	71.26572108
M11137	5B	44882805	0.06709862	0.082474227	99	0.18692084	0.217613792	1	86.4922858
M3785	2B	0	0.067139811	0.453608247	99	0.18692084	0.217604369	1	-65.26230361
M2619	2A	104921223	0.067184111	0.309278351	99	0.18692084	0.217594241	1	-68.35216812
M4764	2B	739389137	0.06718561	0.309278351	99	0.18692084	0.217593899	1	59.83074019
M6918	3B	0	0.067258823	0.309278351	99	0.18692084	0.217577178	1	50.98079072
M12746	6A	609814795	0.067306138	0.24742268	99	0.18692084	0.217566382	1	54.04579204
M4808	2B	736110500	0.067383414	0.443298969	99	0.18692084	0.217548768	1	-81.13456585
M14534	7A	68211926	0.06746401	0.144329897	99	0.18692084	0.21753042	1	-60.13220406
M5597	2D	549857496	0.067560033	0.350515464	99	0.18692084	0.217508592	1	102.1557039
M6170	3A	21325529	0.067565146	0.051546392	99	0.18692084	0.21750743	1	-150.4974895
M13167	6B	89695899	0.067595343	0.463917526	99	0.18692084	0.217500573	1	-51.86530729
M3995	2B	0	0.067662436	0.381443299	99	0.18692084	0.21748535	1	119.2781139
M10758	5B	429171723	0.067679104	0.103092784	99	0.18692084	0.217481571	1	-99.84061123
M2184	1D	423927982	0.067765676	0.288659794	99	0.18692084	0.217461957	1	-68.11549527
M6382	3A	56776160	0.067782223	0.494845361	99	0.18692084	0.217458211	1	51.55155311
M14330	7A	16886742	0.067817329	0.360824742	99	0.18692084	0.217450268	1	-116.5973785
M3310	2A	765401712	0.067910985	0.412371134	99	0.18692084	0.217429097	1	46.25482213
M9236	4A	716789227	0.067911115	0.443298969	99	0.18692084	0.217429068	1	43.565199
M4075	2B	236592763	0.068027166	0.463917526	99	0.18692084	0.21740288	1	82.7722089
M14736	7A	66595158	0.068053555	0.402061856	99	0.18692084	0.217396931	1	-49.14240447
M8922	4A	651777951	0.068053904	0.195876289	99	0.18692084	0.217396853	1	63.20187355
M13393	6B	612219213	0.068109617	0.422680412	99	0.18692084	0.217384303	1	-79.24245649
M7506	3B	130253586	0.068137016	0.257731959	99	0.18692084	0.217378135	1	-60.91467141
M6622	3A	547633295	0.068137864	0.164948454	99	0.18692084	0.217377944	1	-64.39313334
M12076	6A	5480595	0.068157846	0.144329897	99	0.18692084	0.217373448	1	75.38730749
M12883	6A	0	0.068259767	0.340206186	99	0.18692084	0.217350536	1	53.42930285
M9433	4A	743768873	0.068347803	0.257731959	99	0.18692084	0.217330775	1	-67.18686039
M4344	2B	523028887	0.068352102	0.474226804	99	0.18692084	0.217329811	1	63.31879277
M13563	6B	663760681	0.068393618	0.041237113	99	0.18692084	0.217320503	1	-123.7550443
M10227	5A	420625497	0.068522074	0.381443299	99	0.18692084	0.21729174	1	96.88678652
M6056	3A	0	0.068567423	0.278350515	99	0.18692084	0.2172816	1	48.88576575
M3519	2B	0	0.068595097	0.134020619	99	0.18692084	0.217275415	1	-65.74743709
M35	1A	2185082	0.068697951	0.030927835	99	0.18692084	0.217252454	1	-128.155336
M6435	3A	535005885	0.068724503	0.144329897	99	0.18692084	0.217246533	1	-92.69838305
M1191	1B	143362254	0.068792759	0.18556701	99	0.18692084	0.217231322	1	-62.29740571
M710	1B	3569552	0.068971116	0.216494845	99	0.18692084	0.217191653	1	67.85845375
M5031	2B	562205678	0.069086785	0.484536082	99	0.18692084	0.217165987	1	52.06290663
M5556	2D	420984237	0.069183773	0.278350515	99	0.18692084	0.217144502	1	-51.79452833
M9362	4A	734002470	0.0691977	0.103092784	99	0.18692084	0.217141419	1	124.0691104
M5032	2B	562205678	0.069203508	0.268041237	99	0.18692084	0.217140134	1	-57.64697419
M5133	2B	779248164	0.069223147	0.381443299	99	0.18692084	0.217135789	1	-89.48880435
M6493	3A	621586722	0.069225973	0.092783505	99	0.18692084	0.217135163	1	76.84768669
M13297	6B	0	0.069290602	0.443298969	99	0.18692084	0.217120874	1	83.2486561
M6361	3A	357806111	0.069330941	0.298969072	99	0.18692084	0.217111963	1	-68.74582413
M746	1B	2431679	0.069339243	0.360824742	99	0.18692084	0.217110129	1	-67.16146891
M947	1B	711939962	0.069339243	0.360824742	99	0.18692084	0.217110129	1	-67.16146891
M9923	5A	43492598	0.069460748	0.381443299	99	0.18692084	0.217083325	1	105.4847718
M8113	3B	720851922	0.069465913	0.443298969	99	0.18692084	0.217082187	1	-75.01762026
M13128	6B	76722170	0.069556305	0.329896907	99	0.18692084	0.21706228	1	-63.38218501
M3775	2B	0	0.069558872	0.298969072	99	0.18692084	0.217061715	1	57.49245149
M13425	6B	581550867	0.069591244	0.463917526	99	0.18692084	0.217054594	1	78.4906438
M13428	6B	531523075	0.069666807	0.309278351	99	0.18692084	0.217037984	1	56.41511478
M12611	6A	558795265	0.069753901	0.484536082	99	0.18692084	0.217018863	1	78.00217672
M9095	4A	640249155	0.069758688	0.350515464	99	0.18692084	0.217017813	1	-159.111962
M3765	2B	91631796	0.069758688	0.350515464	99	0.18692084	0.217017813	1	159.111962
M9109	4A	142667251	0.069758688	0.350515464	99	0.18692084	0.217017813	1	159.111962
M11868	5B	552916735	0.069774127	0.371134021	99	0.18692084	0.217014427	1	-63.8129755
M5228	2B	643330937	0.069862428	0.402061856	99	0.18692084	0.216995074	1	-57.21077243
M5736	2D	593851647	0.069896423	0.422680412	99	0.18692084	0.216987631	1	85.80462715
M829	1B	441543004	0.069899151	0.412371134	99	0.18692084	0.216987034	1	83.63014443
M9149	4A	22270015	0.069906242	0.175257732	99	0.18692084	0.216985481	1	-73.40010822
M5539	2D	406151871	0.069972592	0.041237113	99	0.18692084	0.216970967	1	115.7951656
M3692	2B	68579934	0.070187661	0.24742268	99	0.18692084	0.216924023	1	-71.48155473
M11398	5B	605874657	0.070189815	0.24742268	99	0.18692084	0.216923554	1	-58.21781923
M7232	3B	22276588	0.070199903	0.329896907	99	0.18692084	0.216921356	1	63.18561165
M5701	2D	591603469	0.070291663	0.041237113	99	0.18692084	0.216901378	1	-106.2961936
M6680	3A	709595134	0.070320676	0.113402062	99	0.18692084	0.216895067	1	-67.97393247
M6943	3B	685866256	0.070382646	0.092783505	99	0.18692084	0.216881598	1	76.84413998
M13296	6B	199924345	0.07043864	0.474226804	99	0.18692084	0.216869438	1	-48.41451718
M1621	1B	589768769	0.070448393	0.463917526	99	0.18692084	0.216867321	1	76.46338938
M12809	6A	603365682	0.070457625	0.082474227	99	0.18692084	0.216865318	1	87.82118157
M14637	7A	122751126	0.07046199	0.391752577	99	0.18692084	0.216864371	1	-95.71398205
M2817	2A	477627488	0.070465886	0.288659794	99	0.18692084	0.216863525	1	-75.66294933
M10907	5B	369307760	0.070507387	0.412371134	99	0.18692084	0.216854523	1	-94.82264278
M2861	2A	562636225	0.070598156	0.453608247	99	0.18692084	0.216834856	1	-54.79821264
M745	1B	2431679	0.070658117	0.288659794	99	0.18692084	0.216821878	1	-68.8478831
M4724	2B	721110923	0.070677803	0.144329897	99	0.18692084	0.21681762	1	75.04827205
M13792	6B	472897480	0.070783316	0.432989691	99	0.18692084	0.21679482	1	68.01611901
M2786	2A	566856432	0.07081881	0.195876289	99	0.18692084	0.216787158	1	59.90801654
M4454	2B	615886571	0.070825472	0.268041237	99	0.18692084	0.216785721	1	-58.10953488
M4986	2B	763445925	0.070883498	0.06185567	99	0.18692084	0.216773206	1	125.1542985
M14829	7A	651721988	0.070930456	0.463917526	99	0.18692084	0.216763086	1	77.93744675
M14310	7A	17286301	0.070990391	0.092783505	99	0.18692084	0.21675018	1	86.72148339
M1060	1B	35143791	0.071205232	0.309278351	99	0.18692084	0.216704017	1	62.04824393
M118	1A	112441140	0.071207991	0.195876289	99	0.18692084	0.216703425	1	54.02130345
M3296	2A	31477695	0.071293973	0.216494845	99	0.18692084	0.216684993	1	-64.40679019
M5931	2D	619962487	0.071299934	0.18556701	99	0.18692084	0.216683716	1	73.00977181
M4443	2B	661444855	0.071528228	0.309278351	99	0.18692084	0.216634898	1	69.42685002
M12946	6A	468839603	0.071576982	0.134020619	99	0.18692084	0.216624495	1	-70.84279165
M3415	2B	576927862	0.071583285	0.18556701	99	0.18692084	0.216623151	1	72.90081138
M4793	2B	724734789	0.071605299	0.051546392	99	0.18692084	0.216618456	1	-96.82798286
M12826	6A	605151507	0.071613717	0.371134021	99	0.18692084	0.216616662	1	54.02554348
M9122	4A	701045149	0.071651343	0.082474227	99	0.18692084	0.216608642	1	-85.91760279
M3791	2B	77236275	0.071764409	0.103092784	99	0.18692084	0.216584573	1	86.04372205
M868	1B	5156091	0.071831783	0.432989691	99	0.18692084	0.21657025	1	53.83162254
M3826	2B	587422326	0.071859488	0.175257732	99	0.18692084	0.216564364	1	-63.89254061
M4151	2B	95129435	0.071946971	0.103092784	99	0.18692084	0.216545796	1	85.37490746
M4171	2B	223152424	0.072246637	0.432989691	99	0.18692084	0.216482377	1	-74.19861601
M7158	3B	27995650	0.072315984	0.309278351	99	0.18692084	0.216467742	1	-46.15935235
M6714	3A	669396058	0.072330664	0.371134021	99	0.18692084	0.216464646	1	-71.86184369
M9114	4A	701293979	0.072488926	0.12371134	99	0.18692084	0.216431311	1	80.62985824
M6277	3A	41376359	0.072851632	0.381443299	99	0.18692084	0.216355212	1	-52.75270115
M4001	2B	213709998	0.07294421	0.195876289	99	0.18692084	0.216335854	1	62.70607289
M10040	5A	441478599	0.073176489	0.226804124	99	0.18692084	0.216287404	1	70.30916459
M9781	4D	446124259	0.073224914	0.340206186	99	0.18692084	0.216277324	1	-102.2914837
M5088	2B	770053999	0.073247677	0.051546392	99	0.18692084	0.216272589	1	-113.7179937
M13414	6B	392948564	0.073267993	0.319587629	99	0.18692084	0.216268363	1	53.41997806
M1627	1B	144111278	0.073552044	0.432989691	99	0.18692084	0.216209422	1	84.26395282
M5836	2D	587202661	0.073556355	0.422680412	99	0.18692084	0.216208529	1	-52.81206126
M10660	5B	239258742	0.073576136	0.484536082	99	0.18692084	0.216204434	1	-67.35367895
M7034	3B	18992985	0.073635357	0.288659794	99	0.18692084	0.216192181	1	61.57310853
M1558	1B	564574859	0.073696895	0.350515464	99	0.18692084	0.216179461	1	58.98098073
M1813	1B	656450092	0.073801443	0.12371134	99	0.18692084	0.216157875	1	86.78822549
M14906	7A	693636591	0.073899477	0.12371134	99	0.18692084	0.216137665	1	80.13474867
M3591	2B	33729356	0.073956925	0.443298969	99	0.18692084	0.216125836	1	86.64334581
M14433	7A	35176915	0.074032497	0.443298969	99	0.18692084	0.21611029	1	-65.94508835
M10858	5B	43702204	0.074128667	0.154639175	99	0.18692084	0.216090531	1	63.75591615
M4244	2B	216955924	0.07437148	0.195876289	99	0.18692084	0.216040769	1	-58.82916636
M10001	5A	394754024	0.074505252	0.288659794	99	0.18692084	0.216013429	1	45.34175472
M700	1A	590240846	0.074535026	0.051546392	99	0.18692084	0.216007351	1	-96.49252814
M4857	2B	748574967	0.074734975	0.340206186	99	0.18692084	0.215966604	1	82.3901382
M13151	6B	100895291	0.074793706	0.412371134	99	0.18692084	0.215954658	1	93.22630377
M2950	2A	549728944	0.074833831	0.463917526	99	0.18692084	0.215946502	1	48.03836909
M13513	6B	517558592	0.074945261	0.092783505	99	0.18692084	0.215923879	1	-86.6921441
M5312	2B	640982600	0.075002268	0.474226804	99	0.18692084	0.215912319	1	62.6511256
M3910	2B	976743	0.075006909	0.494845361	99	0.18692084	0.215911378	1	56.27025716
M15102	7A	720585870	0.075011844	0.041237113	99	0.18692084	0.215910378	1	111.0609556
M6485	3A	598916422	0.075030715	0.257731959	99	0.18692084	0.215906554	1	-51.29469424
M2828	2A	412255299	0.075052365	0.371134021	99	0.18692084	0.215902168	1	55.55657787
M9533	4B	553915738	0.075161351	0.391752577	99	0.18692084	0.21588011	1	70.27154852
M8139	3B	811421481	0.075213609	0.484536082	99	0.18692084	0.215869546	1	66.12189885
M13953	6D	95594839	0.075221161	0.010309278	99	0.18692084	0.21586802	1	216.7836161
M2952	2A	691845663	0.075221161	0.010309278	99	0.18692084	0.21586802	1	216.7836161
M4771	2B	731476082	0.075253847	0.144329897	99	0.18692084	0.215861417	1	-68.92630798
M5538	2D	403467899	0.075403525	0.453608247	99	0.18692084	0.215831221	1	73.09072647
M6402	3A	407747638	0.07541768	0.216494845	99	0.18692084	0.215828369	1	-61.66119797
M1868	1B	478156609	0.075474317	0.329896907	99	0.18692084	0.215816963	1	-58.99760734
M4117	2B	0	0.075527275	0.020618557	99	0.18692084	0.215806306	1	-162.2698535
M5657	2D	579761048	0.075540475	0.381443299	99	0.18692084	0.215803651	1	-71.24068838
M14737	7A	542907733	0.075659797	0.329896907	99	0.18692084	0.215779673	1	51.51246156
M34	1A	3982825	0.075776444	0.082474227	99	0.18692084	0.215756273	1	72.4503395
M3005	2A	709730810	0.075846253	0.432989691	99	0.18692084	0.215742288	1	52.99104291
M13712	6B	464521037	0.075880464	0.453608247	99	0.18692084	0.21573544	1	77.09442188
M12132	6A	5480626	0.07597952	0.237113402	99	0.18692084	0.215715629	1	-65.82967242
M8399	3D	294644099	0.075986	0.319587629	99	0.18692084	0.215714334	1	-59.27106435
M5136	2B	473056696	0.076023508	0.082474227	99	0.18692084	0.215706841	1	92.68205358
M12439	6A	243916466	0.076032198	0.072164948	99	0.18692084	0.215705105	1	87.82600515
M8365	3D	436621773	0.076042337	0.051546392	99	0.18692084	0.215703081	1	94.95579669
M7143	3B	640905058	0.076085064	0.18556701	99	0.18692084	0.215694552	1	69.40803972
M14436	7A	34520428	0.076218036	0.463917526	99	0.18692084	0.215668043	1	74.93076845
M12617	6A	552827957	0.076279212	0.340206186	99	0.18692084	0.215655864	1	71.46807641
M9861	5A	14849690	0.076416516	0.391752577	99	0.18692084	0.215628569	1	86.90704701
M14318	7A	19151787	0.076418094	0.298969072	99	0.18692084	0.215628255	1	49.86282271
M6176	3A	20238715	0.076464039	0.453608247	99	0.18692084	0.215619134	1	53.14100421
M10947	5B	526239910	0.076482882	0.371134021	99	0.18692084	0.215615395	1	-55.51811533
M13574	6B	667201097	0.076510704	0.432989691	99	0.18692084	0.215609875	1	-52.61858173
M6569	3A	655669363	0.076607357	0.371134021	99	0.18692084	0.215590719	1	-63.94075467
M14337	7A	21081193	0.076712589	0.371134021	99	0.18692084	0.215569893	1	107.3499905
M11413	5B	233925191	0.076774545	0.206185567	99	0.18692084	0.215557645	1	-51.92848138
M4969	2B	765063142	0.076820565	0.391752577	99	0.18692084	0.215548555	1	95.2572171
M7492	3B	450294756	0.07683468	0.082474227	99	0.18692084	0.215545768	1	-84.11414031
M897	1B	32775858	0.07692623	0.340206186	99	0.18692084	0.215527706	1	-47.58742435
M15405	7B	509576259	0.076964885	0.12371134	99	0.18692084	0.215520087	1	-81.2266346
M15356	7B	286275361	0.076964885	0.12371134	99	0.18692084	0.215520087	1	81.2266346
M5367	2D	14379312	0.077048503	0.391752577	99	0.18692084	0.21550362	1	-135.1313903
M5239	2B	31519188	0.077048503	0.391752577	99	0.18692084	0.21550362	1	135.1313903
M5266	2B	31477695	0.077048503	0.391752577	99	0.18692084	0.21550362	1	135.1313903
M5326	2B	644096629	0.077048503	0.391752577	99	0.18692084	0.21550362	1	135.1313903
M4438	2B	658484745	0.077057259	0.422680412	99	0.18692084	0.215501896	1	55.0252429
M5391	2D	0	0.077161214	0.340206186	99	0.18692084	0.215481453	1	79.13420803
M4005	2B	231660916	0.077174651	0.391752577	99	0.18692084	0.215478813	1	-50.49747404
M4139	2B	389136726	0.07717598	0.360824742	99	0.18692084	0.215478552	1	109.8894164
M6014	2D	0	0.077231459	0.092783505	99	0.18692084	0.215467657	1	68.7514814
M4411	2B	630595485	0.077239238	0.371134021	99	0.18692084	0.21546613	1	75.79479854
M5276	2B	792988297	0.077255245	0.164948454	99	0.18692084	0.215462988	1	68.2921781
M9646	4B	660656439	0.077285939	0.164948454	99	0.18692084	0.215456966	1	-63.97430649
M2083	1D	52602336	0.07745448	0.453608247	99	0.18692084	0.215423944	1	-99.10019495
M9008	4A	666991274	0.07747685	0.092783505	99	0.18692084	0.215419568	1	-78.93411174
M4835	2B	746680541	0.07751027	0.474226804	99	0.18692084	0.215413031	1	-51.62475334
M10230	5A	534063683	0.077589751	0.381443299	99	0.18692084	0.215397498	1	59.60848313
M1046	1B	94011977	0.077615205	0.134020619	99	0.18692084	0.215392528	1	69.01139631
M7477	3B	311762515	0.077690124	0.134020619	99	0.18692084	0.215377907	1	-73.99309438
M4502	2B	666474631	0.077821441	0.154639175	99	0.18692084	0.215352319	1	-66.74464134
M13320	6B	442429891	0.077881123	0.463917526	99	0.18692084	0.215340705	1	-77.33702464
M6499	3A	533037386	0.077953903	0.484536082	99	0.18692084	0.215326555	1	56.78338989
M10150	5A	458524672	0.077969536	0.360824742	99	0.18692084	0.215323517	1	49.4919158
M14843	7A	316013593	0.078053932	0.175257732	99	0.18692084	0.215307131	1	-64.94222134
M14848	7A	677609350	0.078053932	0.175257732	99	0.18692084	0.215307131	1	-64.94222134
M5112	2B	450656765	0.078069616	0.463917526	99	0.18692084	0.215304087	1	-64.01267869
M3783	2B	91146822	0.07813987	0.257731959	99	0.18692084	0.215290464	1	56.94768544
M3104	2A	744493388	0.078302602	0.237113402	99	0.18692084	0.215258961	1	-57.03041183
M3424	2B	11189847	0.078314789	0.463917526	99	0.18692084	0.215256604	1	70.24904787
M3462	2B	8479321	0.078415886	0.474226804	99	0.18692084	0.215237072	1	-46.64617574
M7701	3B	675030662	0.07844051	0.381443299	99	0.18692084	0.215232319	1	-101.3702702
M5910	2D	615707186	0.078596407	0.144329897	99	0.18692084	0.215202263	1	-69.61089769
M7877	3B	586524432	0.078880805	0.350515464	99	0.18692084	0.215147601	1	-158.5309765
M13681	6B	0	0.078947345	0.432989691	99	0.18692084	0.215134843	1	70.53369707
M904	1B	5549025	0.079102529	0.443298969	99	0.18692084	0.215105135	1	-51.80475331
M3772	2B	600752746	0.079109434	0.329896907	99	0.18692084	0.215103815	1	66.24492486
M3536	2B	717098488	0.079373372	0.484536082	99	0.18692084	0.215053438	1	-53.23525215
M6429	3A	517095336	0.079420313	0.381443299	99	0.18692084	0.215044497	1	122.4795601
M12221	6A	13902305	0.079537617	0.350515464	99	0.18692084	0.215022181	1	53.66695144
M9103	4A	694752965	0.080082015	0.371134021	99	0.18692084	0.214919084	1	-119.8389295
M3018	2A	696839554	0.080099001	0.092783505	99	0.18692084	0.21491588	1	77.42469485
M7247	3B	658078022	0.080124963	0.278350515	99	0.18692084	0.214910983	1	58.7911043
M15481	7B	0	0.080145741	0.175257732	99	0.18692084	0.214907066	1	55.09325769
M2331	2A	441309055	0.080335521	0.443298969	99	0.18692084	0.214871338	1	-86.68268263
M15528	7B	531935983	0.080437133	0.18556701	99	0.18692084	0.214852246	1	-76.32360375
M5647	2D	613045526	0.080440409	0.144329897	99	0.18692084	0.214851631	1	62.54495995
M84	1A	14718514	0.080481263	0.463917526	99	0.18692084	0.214843962	1	-46.59695047
M1672	1B	628033554	0.080520568	0.18556701	99	0.18692084	0.214836589	1	64.83624691
M13276	6B	507595411	0.080577196	0.298969072	99	0.18692084	0.214825973	1	-61.92598693
M2569	2A	71547471	0.080636045	0.474226804	99	0.18692084	0.214814949	1	-51.55593778
M623	1A	578299651	0.080658888	0.474226804	99	0.18692084	0.214810672	1	62.86959303
M3928	2B	180555363	0.080741336	0.103092784	99	0.18692084	0.214795247	1	69.6316579
M2912	2A	676994096	0.080848721	0.340206186	99	0.18692084	0.214775182	1	-75.94303652
M10073	5A	464661923	0.080893531	0.12371134	99	0.18692084	0.214766818	1	74.63991201
M6698	3A	711287701	0.08099916	0.381443299	99	0.18692084	0.214747122	1	-57.98905292
M10686	5B	429836734	0.081024884	0.432989691	99	0.18692084	0.21474233	1	96.18867651
M12485	6A	317623793	0.081026109	0.329896907	99	0.18692084	0.214742102	1	68.10950115
M7294	3B	50790384	0.081107259	0.443298969	99	0.18692084	0.214726995	1	-75.61498481
M8069	3B	788195824	0.081170932	0.12371134	99	0.18692084	0.214715153	1	-71.15326446
M15545	7B	641684991	0.081270835	0.474226804	99	0.18692084	0.214696593	1	83.43961579
M11714	5B	0	0.081271321	0.391752577	99	0.18692084	0.214696503	1	-104.3047563
M11696	5B	0	0.081271321	0.391752577	99	0.18692084	0.214696503	1	104.3047563
M13938	6D	24914334	0.081294844	0.298969072	99	0.18692084	0.214692137	1	-60.7078523
M14786	7A	89214940	0.081389238	0.402061856	99	0.18692084	0.21467463	1	111.2399898
M6431	3A	509564298	0.081407884	0.412371134	99	0.18692084	0.214671174	1	-86.20703111
M15057	7A	708435522	0.081522959	0.237113402	99	0.18692084	0.214649867	1	60.60919775
M1548	1B	0	0.08153894	0.06185567	99	0.18692084	0.21464691	1	-79.5180555
M6638	3A	695160174	0.081676082	0.06185567	99	0.18692084	0.214621565	1	117.7706076
M1192	1B	143362254	0.081697769	0.288659794	99	0.18692084	0.214617561	1	69.3430716
M11693	5B	0	0.081808395	0.432989691	99	0.18692084	0.214597157	1	-84.34946101
M4168	2B	162156739	0.081830905	0.371134021	99	0.18692084	0.214593008	1	-56.31254296
M2664	2A	120722528	0.081883308	0.278350515	99	0.18692084	0.214583356	1	-61.53432718
M14615	7A	0	0.081901819	0.175257732	99	0.18692084	0.214579949	1	-63.17442181
M5454	2D	58726921	0.081935009	0.329896907	99	0.18692084	0.21457384	1	-80.01254099
M3940	2B	503351516	0.081970883	0.402061856	99	0.18692084	0.214567241	1	70.04811617
M5780	2D	586846415	0.082169795	0.412371134	99	0.18692084	0.214530708	1	54.74921973
M12391	6A	149927104	0.082237866	0.268041237	99	0.18692084	0.214518228	1	65.56814002
M6705	3A	711688019	0.082360522	0.319587629	99	0.18692084	0.214495769	1	-62.393736
M9434	4A	743768873	0.082368144	0.412371134	99	0.18692084	0.214494375	1	-63.92979397
M7071	3B	15205844	0.082578242	0.072164948	99	0.18692084	0.214455994	1	78.31631931
M8019	3B	765843802	0.082667875	0.113402062	99	0.18692084	0.214439652	1	70.72093609
M3423	2B	11189847	0.082846776	0.020618557	99	0.18692084	0.214407093	1	-140.6200852
M14019	6D	9514548	0.082877765	0.443298969	99	0.18692084	0.214401461	1	-71.25144185
M867	1B	5156091	0.082886164	0.432989691	99	0.18692084	0.214399936	1	46.31220734
M12763	6A	391337338	0.082923738	0.453608247	99	0.18692084	0.214393111	1	-76.86827972
M1038	1B	92259228	0.08294838	0.072164948	99	0.18692084	0.214388637	1	-76.47375602
M12084	6A	0	0.082982363	0.474226804	99	0.18692084	0.214382469	1	-48.63955648
M3896	2B	118063648	0.083077624	0.175257732	99	0.18692084	0.214365195	1	-59.13871744
M331	1A	474702375	0.083097212	0.319587629	99	0.18692084	0.214361645	1	181.1923924
M4100	2B	419320938	0.083107466	0.474226804	99	0.18692084	0.214359788	1	70.5600569
M5839	2D	571920602	0.083116923	0.474226804	99	0.18692084	0.214358075	1	-65.72856686
M11888	5D	27437516	0.083298772	0.206185567	99	0.18692084	0.214325176	1	50.5160758
M4290	2B	143000173	0.083327446	0.175257732	99	0.18692084	0.214319996	1	64.24498667
M13459	6B	50741757	0.083518116	0.309278351	99	0.18692084	0.214285599	1	-90.26986446
M1204	1B	116830677	0.083543467	0.237113402	99	0.18692084	0.214281033	1	-64.29152294
M13677	6B	705232815	0.083572171	0.041237113	99	0.18692084	0.214275863	1	103.8991016
M3252	2A	759751315	0.083637626	0.154639175	99	0.18692084	0.214264084	1	-56.99214995
M6366	3A	390075139	0.083705531	0.484536082	99	0.18692084	0.214251874	1	47.48810265
M2345	2A	15529824	0.083812017	0.18556701	99	0.18692084	0.214232748	1	100.5574176
M11057	5B	0	0.083915869	0.020618557	99	0.18692084	0.214214122	1	-137.2355304
M1122	1B	39854453	0.084064474	0.371134021	99	0.18692084	0.214187512	1	44.31210641
M6071	3A	12868494	0.084197797	0.402061856	99	0.18692084	0.214163683	1	-57.03505224
M4506	2B	548631440	0.084288695	0.268041237	99	0.18692084	0.214147461	1	60.35284157
M5777	2D	590146863	0.084360315	0.371134021	99	0.18692084	0.214134693	1	-106.0581098
M8146	3B	810657303	0.084398433	0.432989691	99	0.18692084	0.214127902	1	44.91293905
M12984	6B	0	0.084418379	0.278350515	99	0.18692084	0.214124349	1	56.52832325
M10441	5A	275637188	0.084518973	0.463917526	99	0.18692084	0.214106449	1	-63.31338495
M11723	5B	233418958	0.084583071	0.360824742	99	0.18692084	0.214095055	1	-68.47134655
M11289	5B	635677372	0.084584464	0.195876289	99	0.18692084	0.214094808	1	48.81220486
M11104	5B	423757647	0.084600086	0.422680412	99	0.18692084	0.214092032	1	-58.18816595
M7175	3B	28804833	0.084695654	0.412371134	99	0.18692084	0.214075066	1	-43.48064695
M6897	3B	2259539	0.084740037	0.030927835	99	0.18692084	0.214067194	1	-96.50628631
M4365	2B	135437600	0.084760536	0.072164948	99	0.18692084	0.214063559	1	92.59395178
M506	1A	546799796	0.084944617	0.381443299	99	0.18692084	0.214030966	1	48.71861257
M14278	7A	6849511	0.084989151	0.432989691	99	0.18692084	0.214023092	1	-67.67630409
M8182	3B	38722483	0.085023444	0.340206186	99	0.18692084	0.214017032	1	-110.1910657
M182	1A	344675281	0.085029508	0.412371134	99	0.18692084	0.214015961	1	49.16281301
M6186	3A	320920365	0.085054882	0.402061856	99	0.18692084	0.214011479	1	-89.05398388
M6597	3A	664732458	0.085095071	0.309278351	99	0.18692084	0.214004384	1	60.69528325
M15598	7B	241922776	0.085102724	0.319587629	99	0.18692084	0.214003033	1	53.80532688
M11830	5B	692755670	0.085119809	0.360824742	99	0.18692084	0.214000018	1	-102.8134339
M9503	4B	558148549	0.085136634	0.371134021	99	0.18692084	0.213997049	1	117.8256032
M14109	6D	471189232	0.085183935	0.494845361	99	0.18692084	0.213988707	1	-72.70640686
M13045	6B	27984992	0.085219307	0.360824742	99	0.18692084	0.213982473	1	56.90725076
M6189	3A	425085428	0.085261329	0.226804124	99	0.18692084	0.213975069	1	63.60093779
M14444	7A	352533828	0.0854668	0.237113402	99	0.18692084	0.213938928	1	63.44557345
M13541	6B	657260591	0.085472355	0.340206186	99	0.18692084	0.213937952	1	-51.14205591
M10962	5B	552556292	0.085478016	0.371134021	99	0.18692084	0.213936958	1	55.76599187
M8400	3D	294644099	0.085646236	0.484536082	99	0.18692084	0.213907444	1	49.13190245
M14788	7A	89214940	0.085656257	0.18556701	99	0.18692084	0.213905688	1	-62.97569923
M12588	6A	529560822	0.085715581	0.391752577	99	0.18692084	0.213895296	1	92.57199326
M5498	2D	74936166	0.085871551	0.298969072	99	0.18692084	0.213868013	1	48.68268368
M13715	6B	0	0.085873234	0.453608247	99	0.18692084	0.213867719	1	-67.85789077
M5237	2B	642478723	0.085920781	0.319587629	99	0.18692084	0.213859412	1	60.62930738
M4526	2B	547273650	0.085948774	0.402061856	99	0.18692084	0.213854524	1	55.27470826
M1553	1B	47996789	0.086282091	0.402061856	99	0.18692084	0.213796458	1	57.90067907
M7380	3B	239302628	0.086499704	0.051546392	99	0.18692084	0.213758681	1	-87.86311597
M14817	7A	637874688	0.086526309	0.154639175	99	0.18692084	0.213754069	1	-67.36825692
M3912	2B	63622881	0.086585257	0.12371134	99	0.18692084	0.213743858	1	-66.96045979
M723	1B	3569604	0.08669499	0.257731959	99	0.18692084	0.213724869	1	53.53314866
M788	1B	81660700	0.086721124	0.298969072	99	0.18692084	0.21372035	1	51.83560737
M2712	2A	133353425	0.086813611	0.371134021	99	0.18692084	0.213704371	1	-86.97372116
M2377	2A	0	0.086978038	0.494845361	99	0.18692084	0.21367601	1	-65.52984211
M584	1A	0	0.087001042	0.340206186	99	0.18692084	0.213672046	1	182.3642469
M4229	2B	219214772	0.087096772	0.350515464	99	0.18692084	0.213655566	1	-143.3361958
M10843	5B	0	0.087182899	0.371134021	99	0.18692084	0.213640756	1	107.0046423
M9956	5A	52357838	0.087185045	0.474226804	99	0.18692084	0.213640387	1	61.22368035
M871	1B	2431679	0.087186954	0.144329897	99	0.18692084	0.213640059	1	69.9757987
M913	1B	309086631	0.087237194	0.463917526	99	0.18692084	0.213631428	1	-64.78948897
M6477	3A	568024952	0.087239539	0.175257732	99	0.18692084	0.213631025	1	57.32432373
M6691	3A	711365579	0.087457994	0.319587629	99	0.18692084	0.213593559	1	-61.34847258
M7386	3B	48000913	0.087630712	0.453608247	99	0.18692084	0.213564011	1	68.83253518
M3405	2B	798223	0.087638827	0.360824742	99	0.18692084	0.213562624	1	-71.03478326
M11106	5B	511603033	0.087650612	0.371134021	99	0.18692084	0.21356061	1	-67.09368578
M14826	7A	644848734	0.087659107	0.144329897	99	0.18692084	0.213559159	1	-65.48735498
M4218	2B	34735773	0.087736639	0.164948454	99	0.18692084	0.21354592	1	-74.10431367
M7005	3B	15132520	0.0877435	0.072164948	99	0.18692084	0.213544749	1	74.11589044
M4925	2B	370533021	0.087757426	0.18556701	99	0.18692084	0.213542373	1	55.66029587
M15367	7B	158543054	0.087943124	0.154639175	99	0.18692084	0.213510725	1	-69.95228771
M13484	6B	631806635	0.088078904	0.453608247	99	0.18692084	0.213487632	1	80.04459374
M7546	3B	522161250	0.0880807	0.381443299	99	0.18692084	0.213487326	1	48.61309935
M14171	7A	501554142	0.088116604	0.18556701	99	0.18692084	0.213481226	1	-66.39383003
M12532	6A	623438271	0.088172468	0.453608247	99	0.18692084	0.213471741	1	60.62785879
M8061	3B	785499330	0.088346553	0.144329897	99	0.18692084	0.213442224	1	-60.3497811
M10670	5B	68195286	0.088404143	0.391752577	99	0.18692084	0.213432473	1	50.0161709
M12797	6A	599245307	0.088714956	0.340206186	99	0.18692084	0.21337997	1	55.17751983
M3365	2A	463132687	0.088739356	0.494845361	99	0.18692084	0.213375857	1	44.42005325
M1799	1B	746101578	0.088812597	0.329896907	99	0.18692084	0.213363518	1	-100.3232756
M3001	2A	715387158	0.089084022	0.257731959	99	0.18692084	0.213317889	1	77.05273119
M9471	4B	26933807	0.089098394	0.319587629	99	0.18692084	0.213315477	1	64.00274447
M10301	5A	554978654	0.08910475	0.278350515	99	0.18692084	0.213314411	1	-54.80509504
M4691	2B	717237714	0.089128253	0.484536082	99	0.18692084	0.213310468	1	62.96020948
M10813	5B	412452755	0.089238637	0.443298969	99	0.18692084	0.213291965	1	75.37350167
M9133	4A	236257089	0.089355431	0.443298969	99	0.18692084	0.213272416	1	-84.10225622
M2043	1D	33589188	0.089571062	0.319587629	99	0.18692084	0.213236396	1	-97.67391294
M128	1A	16933203	0.089571476	0.226804124	99	0.18692084	0.213236327	1	55.05091714
M13337	6B	166116976	0.089611852	0.432989691	99	0.18692084	0.213229593	1	-67.81922844
M12470	6A	101318939	0.089650722	0.12371134	99	0.18692084	0.213223114	1	-74.91586854
M14712	7A	519254464	0.089662999	0.453608247	99	0.18692084	0.213221068	1	-51.88286222
M4580	2B	0	0.089670462	0.288659794	99	0.18692084	0.213219824	1	-49.61422909
M9919	5A	40170718	0.089719785	0.484536082	99	0.18692084	0.213211609	1	67.79130154
M5778	2D	590146863	0.089922453	0.134020619	99	0.18692084	0.213177903	1	73.26968029
M12625	6A	570488216	0.089924051	0.329896907	99	0.18692084	0.213177638	1	124.3562118
M4440	2B	658617299	0.089973064	0.484536082	99	0.18692084	0.213169499	1	-46.36777231
M2122	1D	4811197	0.090146434	0.195876289	99	0.18692084	0.213140751	1	-67.9976723
M9930	5A	81414626	0.090183238	0.237113402	99	0.18692084	0.213134656	1	56.51113521
M10272	5A	548999062	0.090212416	0.319587629	99	0.18692084	0.213129825	1	-64.71196132
M9367	4A	9881884	0.090318598	0.278350515	99	0.18692084	0.213112262	1	62.39676843
M14475	7A	49592914	0.090322009	0.154639175	99	0.18692084	0.213111698	1	-66.96045594
M13342	6B	203297457	0.090383535	0.453608247	99	0.18692084	0.213101532	1	-75.38417918
M14090	6D	460856196	0.090396485	0.350515464	99	0.18692084	0.213099394	1	-100.025653
M4055	2B	0	0.09043798	0.195876289	99	0.18692084	0.213092543	1	57.08586963
M6587	3A	496490823	0.090584552	0.432989691	99	0.18692084	0.213068372	1	-46.7597968
M9386	4A	739304166	0.090595862	0.371134021	99	0.18692084	0.213066508	1	53.10770578
M14431	7A	0	0.090630636	0.206185567	99	0.18692084	0.213060781	1	67.91915918
M15342	7B	354961752	0.090653321	0.134020619	99	0.18692084	0.213057046	1	-71.95406482
M12287	6A	14388578	0.090682064	0.371134021	99	0.18692084	0.213052315	1	-68.92530791
M15540	7B	642273695	0.090763748	0.164948454	99	0.18692084	0.213038879	1	-58.76606523
M5724	2D	723511239	0.090774409	0.371134021	99	0.18692084	0.213037126	1	70.55038353
M1253	1B	380772381	0.09090454	0.340206186	99	0.18692084	0.213015752	1	87.67516835
M4432	2B	0	0.090907549	0.422680412	99	0.18692084	0.213015258	1	-58.06512328
M8305	3D	19553185	0.090964148	0.422680412	99	0.18692084	0.213005972	1	96.06296728
M11411	5B	368680383	0.091150473	0.216494845	99	0.18692084	0.212975448	1	49.62033041
M5923	2D	695112271	0.091292615	0.494845361	99	0.18692084	0.212952209	1	53.40675588
M3177	2A	758417987	0.091403213	0.402061856	99	0.18692084	0.212934154	1	55.69822477
M13188	6B	124898676	0.091405852	0.134020619	99	0.18692084	0.212933724	1	-68.60322209
M13907	6D	10760515	0.091444238	0.360824742	99	0.18692084	0.212927464	1	51.33146518
M7077	3B	20999249	0.091452476	0.257731959	99	0.18692084	0.21292612	1	52.31448958
M10491	5A	662956259	0.091454616	0.164948454	99	0.18692084	0.212925771	1	-73.07393113
M15396	7B	536555149	0.091574161	0.164948454	99	0.18692084	0.212906296	1	67.5962619
M2033	1D	21146599	0.091957192	0.402061856	99	0.18692084	0.212844082	1	-59.86271328
M14852	7A	676966338	0.091991961	0.195876289	99	0.18692084	0.212838449	1	54.10931284
M894	1B	178656968	0.092000871	0.443298969	99	0.18692084	0.212837006	1	-58.0639434
M781	1B	344369943	0.092022927	0.319587629	99	0.18692084	0.212833434	1	-63.96829298
M5974	2D	640265844	0.092239421	0.432989691	99	0.18692084	0.212798424	1	64.97644905
M4155	2B	107028709	0.092263513	0.381443299	99	0.18692084	0.212794533	1	97.99180068
M6720	3A	714455841	0.092315451	0.319587629	99	0.18692084	0.21278615	1	-50.01347423
M11190	5B	425653407	0.092421604	0.350515464	99	0.18692084	0.212769033	1	91.3154388
M8829	4A	134596051	0.092517737	0.453608247	99	0.18692084	0.21275355	1	-81.02845333
M14476	7A	49592914	0.092537043	0.309278351	99	0.18692084	0.212750442	1	54.49425243
M3457	2B	563859723	0.092541502	0.474226804	99	0.18692084	0.212749725	1	-61.78263629
M14738	7A	542907733	0.092841032	0.422680412	99	0.18692084	0.21270161	1	-47.76070574
M11151	5B	519254488	0.092859429	0.144329897	99	0.18692084	0.21269866	1	-66.59036907
M15317	7B	162339083	0.092874266	0.432989691	99	0.18692084	0.212696282	1	-85.97054761
M3253	2A	759751315	0.092950206	0.391752577	99	0.18692084	0.212684116	1	-63.5969797
M12641	6A	558040487	0.092954575	0.195876289	99	0.18692084	0.212683416	1	53.01781856
M12578	6A	522199017	0.093030192	0.474226804	99	0.18692084	0.212671313	1	56.65229575
M5250	2B	765677047	0.093060386	0.360824742	99	0.18692084	0.212666483	1	86.4656518
M14298	7A	15997601	0.093061887	0.092783505	99	0.18692084	0.212666243	1	83.2222395
M11180	5B	0	0.093090521	0.340206186	99	0.18692084	0.212661664	1	-114.5607577
M7509	3B	485581903	0.093162182	0.350515464	99	0.18692084	0.212650212	1	-61.29868097
M15076	7A	717597472	0.09331961	0.298969072	99	0.18692084	0.212625089	1	58.1938116
M7336	3B	65705367	0.093326425	0.113402062	99	0.18692084	0.212624002	1	79.51140082
M13595	6B	47980535	0.093331766	0.391752577	99	0.18692084	0.212623151	1	59.33802099
M11975	5D	546924756	0.093393995	0.381443299	99	0.18692084	0.212613234	1	-49.74612528
M15445	7B	541509916	0.093397273	0.350515464	99	0.18692084	0.212612712	1	48.89991183
M8405	3D	305622118	0.093439465	0.381443299	99	0.18692084	0.212605993	1	81.85284313
M14568	7A	83158962	0.093463644	0.463917526	99	0.18692084	0.212602144	1	-63.10919125
M11792	5B	656472011	0.093552311	0.237113402	99	0.18692084	0.212588038	1	-56.49264712
M7242	3B	43051220	0.093624051	0.237113402	99	0.18692084	0.212576636	1	-57.46907272
M12269	6A	219188654	0.093673548	0.422680412	99	0.18692084	0.212568775	1	-80.82212546
M12182	6A	7997688	0.093743562	0.402061856	99	0.18692084	0.212557664	1	51.26460218
M6652	3A	506259895	0.093932745	0.072164948	99	0.18692084	0.212527684	1	85.03176129
M11149	5B	421995258	0.093934288	0.18556701	99	0.18692084	0.21252744	1	62.60113388
M5085	2B	757936127	0.09397255	0.432989691	99	0.18692084	0.212521385	1	53.0448916
M6664	3A	702562913	0.093986882	0.278350515	99	0.18692084	0.212519118	1	-61.54822985
M1592	1B	0	0.094064804	0.082474227	99	0.18692084	0.212506797	1	-74.40365852
M8254	3D	16234201	0.094135707	0.226804124	99	0.18692084	0.212495596	1	-69.75219642
M8287	3D	9312378	0.094135707	0.226804124	99	0.18692084	0.212495596	1	69.75219642
M7408	3B	73443935	0.094142077	0.113402062	99	0.18692084	0.21249459	1	70.71552456
M14864	7A	234008363	0.094163353	0.164948454	99	0.18692084	0.212491231	1	-62.47465289
M10868	5B	14901284	0.094218227	0.402061856	99	0.18692084	0.212482571	1	-53.54588395
M6568	3A	658048755	0.094237033	0.350515464	99	0.18692084	0.212479605	1	-64.95597977
M12575	6A	524836376	0.094330829	0.391752577	99	0.18692084	0.212464819	1	-87.28102316
M15395	7B	536555149	0.094355106	0.134020619	99	0.18692084	0.212460995	1	-67.38259318
M11248	5B	513202029	0.094389419	0.092783505	99	0.18692084	0.212455592	1	76.06423367
M4437	2B	658484745	0.094514223	0.309278351	99	0.18692084	0.212435956	1	-47.41488127
M11320	5B	472227636	0.094724877	0.164948454	99	0.18692084	0.21240288	1	-53.15960626
M4049	2B	574509277	0.094742128	0.412371134	99	0.18692084	0.212400175	1	-46.36002907
M9998	5A	69102517	0.094743125	0.154639175	99	0.18692084	0.212400018	1	-55.87903699
M13345	6B	486549528	0.094748059	0.278350515	99	0.18692084	0.212399245	1	52.74190959
M12055	6A	1338546	0.094844015	0.494845361	99	0.18692084	0.212384209	1	65.66852733
M10637	5B	47286882	0.094872961	0.092783505	99	0.18692084	0.212379676	1	-99.22586106
M6034	3A	35214169	0.095386659	0.432989691	99	0.18692084	0.212299494	1	44.06419951
M2389	2A	24002743	0.095410257	0.412371134	99	0.18692084	0.212295822	1	68.78262268
M15455	7B	584314006	0.095435637	0.319587629	99	0.18692084	0.212291874	1	53.72915498
M12664	6A	543972128	0.095523022	0.103092784	99	0.18692084	0.21227829	1	-74.71288086
M12800	6A	599927110	0.095612205	0.402061856	99	0.18692084	0.21226444	1	-60.04638418
M7255	3B	45197552	0.095635299	0.422680412	99	0.18692084	0.212260856	1	56.12810622
M346	1A	486815863	0.095667249	0.12371134	99	0.18692084	0.212255899	1	70.05824472
M4172	2B	223152424	0.095696705	0.072164948	99	0.18692084	0.212251331	1	83.81827976
M9975	5A	593667669	0.095714217	0.257731959	99	0.18692084	0.212248615	1	49.2689525
M423	1A	506671585	0.095758133	0.443298969	99	0.18692084	0.212241809	1	56.42898982
M13577	6B	668513674	0.095850092	0.092783505	99	0.18692084	0.212227567	1	-85.08547591
M2896	2A	0	0.09608774	0.391752577	99	0.18692084	0.212190832	1	44.44819993
M13586	6B	664709293	0.096275462	0.072164948	99	0.18692084	0.212161885	1	78.19642337
M15149	7A	734102612	0.09630125	0.453608247	99	0.18692084	0.212157913	1	-57.58228509
M2169	1D	423928525	0.096345094	0.381443299	99	0.18692084	0.212151164	1	56.32232631
M11959	5D	545694488	0.096457512	0.319587629	99	0.18692084	0.212133873	1	57.79750024
M7256	3B	45197552	0.096462234	0.298969072	99	0.18692084	0.212133147	1	58.34479582
M10659	5B	239258742	0.096567993	0.164948454	99	0.18692084	0.212116901	1	-61.63310824
M10744	5B	360428929	0.096654518	0.092783505	99	0.18692084	0.212103625	1	68.45115156
M12976	6B	2439812	0.096661286	0.340206186	99	0.18692084	0.212102587	1	46.29490958
M5274	2B	799057190	0.096728751	0.381443299	99	0.18692084	0.212092245	1	124.0496667
M5235	2B	794002225	0.096728751	0.381443299	99	0.18692084	0.212092245	1	-124.0496667
M10558	5B	9075119	0.096773431	0.18556701	99	0.18692084	0.2120854	1	70.11376234
M645	1A	584104138	0.096840168	0.340206186	99	0.18692084	0.212075183	1	-41.30405785
M11731	5B	668828491	0.096912135	0.402061856	99	0.18692084	0.212064174	1	-77.08271504
M3584	2B	40945523	0.09694917	0.360824742	99	0.18692084	0.212058512	1	59.39706996
M15491	7B	206170311	0.09705746	0.206185567	99	0.18692084	0.21204197	1	-64.04467849
M11998	5D	553338175	0.097117591	0.360824742	99	0.18692084	0.212032794	1	-44.23101836
M794	1B	0	0.097122567	0.474226804	99	0.18692084	0.212032035	1	-53.58914996
M15484	7B	0	0.097127027	0.381443299	99	0.18692084	0.212031355	1	100.0928852
M13436	6B	126997677	0.097416929	0.257731959	99	0.18692084	0.211987207	1	65.7335596
M10522	5A	691820950	0.097505971	0.237113402	99	0.18692084	0.211973676	1	-53.68035703
M13790	6B	469537832	0.097564677	0.329896907	99	0.18692084	0.211964763	1	-101.5492473
M13821	6B	0	0.097575025	0.381443299	99	0.18692084	0.211963192	1	62.59682602
M4632	2B	719966802	0.097645702	0.113402062	99	0.18692084	0.21195247	1	-80.5099055
M4488	2B	577540966	0.09771675	0.134020619	99	0.18692084	0.211941701	1	-73.04267814
M4436	2B	620850327	0.098016079	0.463917526	99	0.18692084	0.211896424	1	50.64260259
M6296	3A	59429672	0.098056248	0.237113402	99	0.18692084	0.21189036	1	46.33211935
M8179	3B	822819663	0.098111287	0.402061856	99	0.18692084	0.211882055	1	51.07440047
M1547	1B	0	0.098207636	0.340206186	99	0.18692084	0.211867529	1	-78.30056256
M4588	2B	0	0.098291062	0.350515464	99	0.18692084	0.211854965	1	63.76196348
M6594	3A	653961703	0.098339204	0.319587629	99	0.18692084	0.211847719	1	55.97851614
M12512	6A	454707090	0.098460609	0.329896907	99	0.18692084	0.211829466	1	96.21447888
M6728	3A	715967941	0.098571158	0.340206186	99	0.18692084	0.211812866	1	-169.8932347
M8409	3D	380816249	0.098571158	0.340206186	99	0.18692084	0.211812866	1	-169.8932347
M13974	6D	85804139	0.098679839	0.463917526	99	0.18692084	0.211796567	1	-68.57014956
M6516	3A	481213917	0.098720031	0.371134021	99	0.18692084	0.211790545	1	-48.11661946
M975	1B	94373668	0.098762084	0.24742268	99	0.18692084	0.211784246	1	54.12476479
M4586	2B	710353117	0.09882075	0.463917526	99	0.18692084	0.211775464	1	-63.69890555
M6178	3A	348215507	0.09885712	0.12371134	99	0.18692084	0.211770023	1	84.72756931
M7518	3B	426296060	0.098890226	0.103092784	99	0.18692084	0.211765072	1	63.33312405
M11710	5B	656933443	0.099112853	0.350515464	99	0.18692084	0.211731825	1	-85.83252385
M6195	3A	22831857	0.099112861	0.082474227	99	0.18692084	0.211731824	1	-68.36442921
M8516	3D	614023013	0.099244885	0.371134021	99	0.18692084	0.211712146	1	56.94997063
M14280	7A	13884507	0.099265127	0.402061856	99	0.18692084	0.211709132	1	74.64904409
M701	1B	3572450	0.099328483	0.371134021	99	0.18692084	0.211699702	1	-55.81523014
M12581	6A	525799703	0.099414539	0.432989691	99	0.18692084	0.211686903	1	-57.20168532
M2519	2A	34350090	0.099580927	0.371134021	99	0.18692084	0.211662192	1	-49.06755321
M5841	2D	579196310	0.099583381	0.298969072	99	0.18692084	0.211661828	1	46.25266563
M3456	2B	0	0.099593811	0.474226804	99	0.18692084	0.211660281	1	-65.53939281
M3323	2A	0	0.099595774	0.360824742	99	0.18692084	0.21165999	1	-115.5389777
M3307	2A	244963962	0.099595774	0.360824742	99	0.18692084	0.21165999	1	115.5389777
M1002	1B	95344234	0.099597379	0.257731959	99	0.18692084	0.211659751	1	59.67122579
M13548	6B	479212545	0.099684451	0.206185567	99	0.18692084	0.211646841	1	-54.81190833
M7459	3B	168137999	0.099699253	0.144329897	99	0.18692084	0.211644647	1	62.50763364
M10512	5A	679723058	0.099764786	0.474226804	99	0.18692084	0.21163494	1	-64.45621691
M7246	3B	0	0.09985766	0.432989691	99	0.18692084	0.211621195	1	-58.15331473
M6371	3A	202000975	0.099899708	0.474226804	99	0.18692084	0.211614977	1	-67.3838567
M2472	2A	19484111	0.09996977	0.319587629	99	0.18692084	0.211604622	1	61.25833832
M5113	2B	622858890	0.100037328	0.278350515	99	0.18692084	0.211594645	1	-54.42392614
M5436	2D	33564182	0.100045269	0.350515464	99	0.18692084	0.211593473	1	-73.70456546
M5318	2B	31519188	0.100206951	0.288659794	99	0.18692084	0.211569628	1	-75.79793283
M5118	2B	510095712	0.100223027	0.422680412	99	0.18692084	0.21156726	1	-80.66830616
M4548	2B	37117645	0.100344913	0.226804124	99	0.18692084	0.211549315	1	-57.4083167
M8680	4A	157557592	0.100458335	0.24742268	99	0.18692084	0.211532639	1	55.88586947
M4146	2B	184403011	0.100474509	0.164948454	99	0.18692084	0.211530263	1	76.98165234
M7196	3B	0	0.100521219	0.216494845	99	0.18692084	0.211523402	1	-58.50352796
M6185	3A	320920365	0.100620803	0.329896907	99	0.18692084	0.211508788	1	123.8562385
M14599	7A	108215582	0.100632715	0.391752577	99	0.18692084	0.211507041	1	-61.06564547
M3814	2B	99767221	0.100803491	0.12371134	99	0.18692084	0.211482019	1	65.16554958
M9634	4B	0	0.100891219	0.350515464	99	0.18692084	0.211469184	1	57.06978221
M15411	7B	517623844	0.100909869	0.113402062	99	0.18692084	0.211466457	1	61.55077601
M6413	3A	509564298	0.100910206	0.391752577	99	0.18692084	0.211466407	1	67.09933649
M7396	3B	116111200	0.100926306	0.443298969	99	0.18692084	0.211464053	1	68.04604278
M2966	2A	705340913	0.100940817	0.072164948	99	0.18692084	0.211461932	1	72.38875883
M7086	3B	702849155	0.100982072	0.329896907	99	0.18692084	0.211455904	1	-49.02036686
M716	1B	0	0.101086509	0.309278351	99	0.18692084	0.211440655	1	51.19537279
M1782	1B	644598781	0.101154696	0.226804124	99	0.18692084	0.211430709	1	47.03903517
M1657	1B	73116851	0.101238384	0.113402062	99	0.18692084	0.211418512	1	61.00372718
M6072	3A	12868494	0.101286953	0.24742268	99	0.18692084	0.211411438	1	44.71729445
M5496	2D	77122284	0.101310678	0.288659794	99	0.18692084	0.211407984	1	56.70615034
M13152	6B	100895291	0.101367267	0.484536082	99	0.18692084	0.211399749	1	-55.64085022
M14941	7A	701052545	0.101537791	0.422680412	99	0.18692084	0.211374965	1	-46.30743251
M5566	2D	375935762	0.101619209	0.484536082	99	0.18692084	0.211363148	1	49.01137799
M11809	5B	547969854	0.101655454	0.216494845	99	0.18692084	0.211357891	1	-61.02981688
M9765	4D	394378216	0.101897228	0.092783505	99	0.18692084	0.211322876	1	74.5442651
M6637	3A	695160174	0.101915412	0.164948454	99	0.18692084	0.211320246	1	-65.98802727
M11732	5B	668828491	0.101941647	0.06185567	99	0.18692084	0.211316453	1	-101.8878383
M3990	2B	126899677	0.101968153	0.12371134	99	0.18692084	0.211312622	1	66.20208374
M478	1A	540665432	0.101976762	0.319587629	99	0.18692084	0.211311378	1	-48.53424587
M255	1A	381273827	0.102021514	0.195876289	99	0.18692084	0.211304912	1	-66.4435321
M3243	2A	759767692	0.102122925	0.072164948	99	0.18692084	0.211290272	1	81.48723944
M4947	2B	760119516	0.102208266	0.391752577	99	0.18692084	0.211277965	1	45.78089961
M9052	4A	655256201	0.102229048	0.175257732	99	0.18692084	0.21127497	1	-76.17232984
M10877	5B	540056844	0.102293477	0.402061856	99	0.18692084	0.211265688	1	48.31687857
M3295	2A	31477695	0.102411002	0.422680412	99	0.18692084	0.211248774	1	73.47783793
M811	1B	0	0.102435415	0.443298969	99	0.18692084	0.211245263	1	53.74538473
M670	1A	583895706	0.102437476	0.350515464	99	0.18692084	0.211244967	1	43.9318781
M6497	3A	625237502	0.102462594	0.494845361	99	0.18692084	0.211241355	1	-52.50801292
M1638	1B	601383349	0.102465034	0.103092784	99	0.18692084	0.211241005	1	-62.9499475
M11077	5B	502152339	0.102544575	0.268041237	99	0.18692084	0.211229576	1	54.13175876
M5583	2D	492520823	0.10254465	0.360824742	99	0.18692084	0.211229565	1	116.3844289
M4735	2B	712959228	0.10255631	0.402061856	99	0.18692084	0.211227891	1	-76.92581794
M471	1A	520328681	0.102586962	0.206185567	99	0.18692084	0.21122349	1	59.71404556
M14350	7A	26240264	0.102612247	0.278350515	99	0.18692084	0.211219861	1	73.05634827
M12475	6A	113852300	0.102630457	0.154639175	99	0.18692084	0.211217247	1	55.91322761
M11259	5B	635769576	0.102654065	0.051546392	99	0.18692084	0.21121386	1	-87.39034237
M2066	1D	26257862	0.102667035	0.443298969	99	0.18692084	0.211212	1	70.03207982
M3929	2B	144247105	0.102738756	0.113402062	99	0.18692084	0.211201717	1	-63.49992284
M1576	1B	420600926	0.102743085	0.381443299	99	0.18692084	0.211201097	1	-114.2570605
M3096	2A	610377425	0.102804416	0.360824742	99	0.18692084	0.21119231	1	-45.46086177
M8621	4A	127984307	0.102860809	0.020618557	99	0.18692084	0.211184236	1	-127.1725127
M13775	6B	0	0.102920049	0.494845361	99	0.18692084	0.21117576	1	-51.76496808
M5280	2B	549670301	0.102963165	0.164948454	99	0.18692084	0.211169594	1	-65.0073098
M7076	3B	10249151	0.103260413	0.463917526	99	0.18692084	0.211127164	1	49.57151019
M2304	1D	0	0.103389323	0.103092784	99	0.18692084	0.211108806	1	-80.50615414
M4062	2B	0	0.103477809	0.278350515	99	0.18692084	0.211096219	1	47.8642043
M6022	3A	8232937	0.103503515	0.113402062	99	0.18692084	0.211092564	1	58.95793598
M13711	6B	464521037	0.103629349	0.092783505	99	0.18692084	0.21107469	1	85.95459987
M10661	5B	71300457	0.103639783	0.18556701	99	0.18692084	0.211073209	1	61.0708371
M12478	6A	226020901	0.103703284	0.412371134	99	0.18692084	0.211064199	1	-80.55395434
M12042	6A	0	0.10376144	0.216494845	99	0.18692084	0.211055953	1	-57.75298892
M6741	3A	716528015	0.103909615	0.402061856	99	0.18692084	0.211034966	1	-61.06652169
M12425	6A	53499702	0.104037496	0.164948454	99	0.18692084	0.21101688	1	-57.91883799
M12647	6A	592875661	0.104063262	0.463917526	99	0.18692084	0.211013239	1	70.30298586
M8515	3D	614023013	0.104169852	0.391752577	99	0.18692084	0.210998188	1	-65.68148658
M14820	7A	636900029	0.104183315	0.18556701	99	0.18692084	0.210996288	1	-57.31063907
M3782	2B	59124498	0.104213626	0.391752577	99	0.18692084	0.210992011	1	65.51170131
M5497	2D	74936166	0.104290943	0.484536082	99	0.18692084	0.210981109	1	-48.67524295
M6592	3A	174031646	0.104432038	0.340206186	99	0.18692084	0.210961237	1	-58.92579438
M819	1B	500146991	0.104736659	0.412371134	99	0.18692084	0.210918436	1	52.64023159
M1769	1B	64478551	0.104774056	0.12371134	99	0.18692084	0.210913191	1	59.00918921
M5210	2B	800780319	0.104804795	0.082474227	99	0.18692084	0.210908881	1	72.45184362
M1776	1B	641140613	0.104880563	0.206185567	99	0.18692084	0.210898264	1	53.39277381
M1669	1B	656111729	0.104910246	0.422680412	99	0.18692084	0.210894107	1	-49.48569316
M13311	6B	0	0.104911044	0.422680412	99	0.18692084	0.210893996	1	-68.11950896
M3843	2B	136811320	0.104916651	0.175257732	99	0.18692084	0.210893211	1	70.73761905
M6102	3A	18171651	0.105022834	0.24742268	99	0.18692084	0.210878352	1	-50.24744069
M14591	7A	94495522	0.105029003	0.474226804	99	0.18692084	0.210877489	1	58.97183848
M2506	2A	419266894	0.105091407	0.494845361	99	0.18692084	0.210868765	1	51.6305001
M2812	2A	166864123	0.10524213	0.041237113	99	0.18692084	0.210847718	1	102.2392487
M1996	1D	8818793	0.105346048	0.371134021	99	0.18692084	0.210833226	1	57.7837459
M13027	6B	21092440	0.105362065	0.329896907	99	0.18692084	0.210830994	1	56.57976589
M6329	3A	457796953	0.105425061	0.113402062	99	0.18692084	0.210822218	1	-60.82259476
M12511	6A	454707090	0.1054505	0.391752577	99	0.18692084	0.210818676	1	-66.11752529
M4206	2B	195059364	0.105535906	0.24742268	99	0.18692084	0.210806791	1	-62.22687571
M14257	7A	0	0.105706137	0.319587629	99	0.18692084	0.210783134	1	-46.14528517
M2128	1D	413406127	0.105709155	0.092783505	99	0.18692084	0.210782715	1	-63.83154789
M10889	5B	367689148	0.105736246	0.226804124	99	0.18692084	0.210778954	1	60.06706764
M15379	7B	458724766	0.10575183	0.278350515	99	0.18692084	0.210776791	1	56.52739817
M6272	3A	52210548	0.105954803	0.453608247	99	0.18692084	0.210748652	1	-75.93400025
M8827	4A	138660384	0.10598164	0.484536082	99	0.18692084	0.210744936	1	-61.53269772
M8590	4A	85574825	0.106126819	0.422680412	99	0.18692084	0.210724852	1	81.51565988
M13274	6B	196677969	0.10613306	0.432989691	99	0.18692084	0.210723989	1	-66.95581067
M3386	2A	588436341	0.106171239	0.340206186	99	0.18692084	0.210718713	1	42.652537
M7656	3B	593933727	0.106439868	0.226804124	99	0.18692084	0.210681649	1	-62.88541994
M15362	7B	159301016	0.106471519	0.144329897	99	0.18692084	0.210677288	1	-67.42728157
M10782	5B	410537310	0.106471519	0.144329897	99	0.18692084	0.210677288	1	67.42728157
M4942	2B	762091833	0.106522639	0.041237113	99	0.18692084	0.210670249	1	-93.78881116
M13572	6B	561062316	0.106535767	0.216494845	99	0.18692084	0.210668442	1	-50.62416672
M6229	3A	563120760	0.106555455	0.443298969	99	0.18692084	0.210665733	1	58.82410802
M2858	2A	52393884	0.106624132	0.422680412	99	0.18692084	0.210656285	1	-51.69908685
M1424	1B	418720052	0.106755705	0.350515464	99	0.18692084	0.210638204	1	-43.11762396
M4275	2B	552907148	0.106785055	0.391752577	99	0.18692084	0.210634174	1	-44.20689538
M7241	3B	43051220	0.106814592	0.412371134	99	0.18692084	0.21063012	1	-54.66980718
M6270	3A	52210548	0.106845559	0.463917526	99	0.18692084	0.21062587	1	54.2837882
M13242	6B	216629004	0.106848409	0.391752577	99	0.18692084	0.210625479	1	-45.2216503
M4535	2B	671040940	0.106909671	0.484536082	99	0.18692084	0.210617077	1	62.08754633
M13266	6B	203292178	0.106928314	0.484536082	99	0.18692084	0.210614521	1	-66.90898357
M11801	5B	769192822	0.106972986	0.494845361	99	0.18692084	0.210608399	1	-72.6206199
M9958	5A	74419583	0.1070405	0.164948454	99	0.18692084	0.210599152	1	56.16744724
M13897	6D	7716534	0.107142574	0.319587629	99	0.18692084	0.210585183	1	54.95913325
M5314	2B	641868694	0.107168999	0.18556701	99	0.18692084	0.21058157	1	52.5466476
M9148	4A	22270015	0.107174557	0.164948454	99	0.18692084	0.210580809	1	-73.33960582
M38	1A	2276875	0.107190204	0.350515464	99	0.18692084	0.21057867	1	-58.24863943
M5114	2B	622858890	0.10723223	0.494845361	99	0.18692084	0.210572926	1	47.29224265
M1690	1B	612865939	0.10723923	0.494845361	99	0.18692084	0.21057197	1	50.71421769
M3606	2B	163007189	0.107273033	0.463917526	99	0.18692084	0.210567352	1	-44.49518424
M3776	2B	0	0.107314268	0.257731959	99	0.18692084	0.210561721	1	-85.89332179
M817	1B	21249692	0.107349004	0.298969072	99	0.18692084	0.210556979	1	53.21134403
M910	1B	157936646	0.10740458	0.494845361	99	0.18692084	0.210549396	1	71.09619161
M5121	2B	779147544	0.107506258	0.412371134	99	0.18692084	0.210535534	1	72.17739338
M15417	7B	538125772	0.107614796	0.371134021	99	0.18692084	0.210520753	1	-54.39865929
M14191	7A	13842196	0.107636506	0.06185567	99	0.18692084	0.210517799	1	-79.189494
M11079	5B	505694656	0.107664396	0.288659794	99	0.18692084	0.210514004	1	-62.52487893
M14097	6D	461702450	0.107688866	0.020618557	99	0.18692084	0.210510676	1	146.2130851
M14162	7A	150861541	0.107688866	0.020618557	99	0.18692084	0.210510676	1	146.2130851
M9237	4A	727965119	0.107742269	0.051546392	99	0.18692084	0.210503415	1	79.9258384
M13853	6D	1414317	0.107765248	0.412371134	99	0.18692084	0.210500292	1	-51.12164888
M8763	4A	595543015	0.108090417	0.06185567	99	0.18692084	0.210456178	1	-78.2254648
M5802	2D	729134384	0.108215047	0.402061856	99	0.18692084	0.210439309	1	-59.65899689
M4664	2B	0	0.108285094	0.329896907	99	0.18692084	0.210429838	1	-57.41837112
M3847	2B	78508701	0.108304105	0.422680412	99	0.18692084	0.210427268	1	-47.26238918
M22	1A	2276875	0.108332127	0.278350515	99	0.18692084	0.210423482	1	-45.25480122
M4215	2B	556692090	0.108510291	0.474226804	99	0.18692084	0.210399434	1	81.58991182
M8801	4A	603746204	0.108533638	0.216494845	99	0.18692084	0.210396286	1	51.43045041
M9414	4A	743748313	0.108639348	0.381443299	99	0.18692084	0.210382042	1	70.26510948
M4693	2B	723159590	0.108695681	0.371134021	99	0.18692084	0.210374457	1	56.50708993
M10667	5B	67969342	0.108746377	0.402061856	99	0.18692084	0.210367636	1	-91.91421215
M5676	2D	461273161	0.108749289	0.484536082	99	0.18692084	0.210367244	1	46.91245219
M14728	7A	495536855	0.108786557	0.340206186	99	0.18692084	0.210362232	1	-55.16746002
M4826	2B	749922381	0.108847683	0.268041237	99	0.18692084	0.210354015	1	-56.64331159
M5304	2B	638876490	0.108852545	0.144329897	99	0.18692084	0.210353361	1	61.31862758
M619	1A	579302653	0.108879767	0.154639175	99	0.18692084	0.210349704	1	58.21530276
M15329	7B	147686272	0.108886168	0.12371134	99	0.18692084	0.210348844	1	-65.90167693
M5308	2B	799254327	0.109005577	0.278350515	99	0.18692084	0.210332813	1	-71.17805505
M7772	3B	717363505	0.109040552	0.051546392	99	0.18692084	0.210328121	1	90.15145867
M9451	4B	13088435	0.109230755	0.298969072	99	0.18692084	0.210302636	1	57.49438515
M3444	2B	564075186	0.109263197	0.371134021	99	0.18692084	0.210298294	1	-43.57736482
M815	1B	183264864	0.109396064	0.134020619	99	0.18692084	0.210280526	1	-70.65569075
M4686	2B	704429363	0.109509866	0.494845361	99	0.18692084	0.210265327	1	55.96845543
M4576	2B	692104873	0.109536586	0.092783505	99	0.18692084	0.210261761	1	62.28026191
M13801	6B	466953416	0.109655985	0.474226804	99	0.18692084	0.210245838	1	51.45981717
M7911	3B	289065738	0.109678134	0.474226804	99	0.18692084	0.210242886	1	59.24500852
M761	1B	25945971	0.109742305	0.443298969	99	0.18692084	0.210234338	1	-45.73137848
M14305	7A	6803153	0.109880012	0.195876289	99	0.18692084	0.210216013	1	52.01414475
M5183	2B	781773910	0.109987235	0.371134021	99	0.18692084	0.210201763	1	47.73570369
M10587	5B	576692587	0.110008786	0.484536082	99	0.18692084	0.2101989	1	-63.605487
M13169	6B	85384559	0.110017626	0.340206186	99	0.18692084	0.210197727	1	-45.35300162
M13849	6B	715630902	0.110083183	0.195876289	99	0.18692084	0.210189024	1	73.7662136
M2095	1D	366012746	0.110112871	0.237113402	99	0.18692084	0.210185085	1	74.66155667
M6645	3A	695611858	0.110173027	0.329896907	99	0.18692084	0.210177107	1	74.4967424
M715	1B	0	0.110185712	0.463917526	99	0.18692084	0.210175425	1	-50.45272901
M4422	2B	619000495	0.110190963	0.360824742	99	0.18692084	0.210174729	1	-44.80644355
M269	1A	479742741	0.110366783	0.226804124	99	0.18692084	0.210151444	1	57.36345729
M9521	4B	521574122	0.110388117	0.412371134	99	0.18692084	0.210148621	1	-45.7742731
M785	1B	0	0.110533256	0.474226804	99	0.18692084	0.210129434	1	42.33404378
M5594	2D	708346816	0.110589387	0.329896907	99	0.18692084	0.210122021	1	-49.66105468
M14024	6D	357593819	0.110983413	0.484536082	99	0.18692084	0.210070104	1	62.84725283
M14640	7A	131108912	0.110986576	0.391752577	99	0.18692084	0.210069688	1	-84.90093331
M10581	5B	21538502	0.111125428	0.257731959	99	0.18692084	0.210051442	1	50.23987199
M3818	2B	99966648	0.1111776	0.24742268	99	0.18692084	0.210044593	1	-57.88647977
M10347	5A	565612395	0.11118948	0.257731959	99	0.18692084	0.210043034	1	-52.74160632
M8337	3D	48663994	0.111226721	0.463917526	99	0.18692084	0.210038147	1	43.4400865
M5167	2B	779863093	0.111305889	0.041237113	99	0.18692084	0.210027766	1	-109.828107
M3669	2B	598294949	0.111457139	0.319587629	99	0.18692084	0.210007956	1	-54.57634847
M5310	2B	795281951	0.111464994	0.072164948	99	0.18692084	0.210006928	1	85.80553844
M10773	5B	373077326	0.111475364	0.12371134	99	0.18692084	0.210005571	1	63.91650781
M14971	7A	621160098	0.111515563	0.072164948	99	0.18692084	0.210000312	1	-71.5266975
M2732	2A	179992753	0.111898544	0.134020619	99	0.18692084	0.209950315	1	98.98094352
M3909	2B	976743	0.111958698	0.278350515	99	0.18692084	0.209942479	1	-71.67660337
M8901	4A	668789773	0.11202486	0.340206186	99	0.18692084	0.209933866	1	-53.96755488
M4373	2B	446932626	0.112030084	0.340206186	99	0.18692084	0.209933186	1	-49.26117117
M8548	4A	381110396	0.112051349	0.237113402	99	0.18692084	0.20993042	1	47.39048788
M4156	2B	107028709	0.112069663	0.257731959	99	0.18692084	0.209928037	1	-51.48255859
M4493	2B	655597649	0.112079619	0.453608247	99	0.18692084	0.209926742	1	-76.88968304
M9425	4A	1736032	0.11213271	0.206185567	99	0.18692084	0.209919839	1	-52.0629188
M3425	2B	4472312	0.112233762	0.226804124	99	0.18692084	0.209906709	1	56.70003113
M7973	3B	113713782	0.112247033	0.443298969	99	0.18692084	0.209904986	1	-55.34640923
M8912	4A	32202337	0.112263251	0.051546392	99	0.18692084	0.20990288	1	73.2408413
M7809	3B	544414886	0.112280334	0.072164948	99	0.18692084	0.209900663	1	82.14750042
M7721	3B	675281060	0.112321021	0.319587629	99	0.18692084	0.209895382	1	-78.9495516
M5207	2B	776263331	0.112323659	0.319587629	99	0.18692084	0.20989504	1	45.50201128
M7693	3B	684619731	0.112376248	0.288659794	99	0.18692084	0.209888219	1	-66.37065313
M11623	5B	595052151	0.112478216	0.350515464	99	0.18692084	0.209875002	1	-139.629505
M9061	4A	4271248	0.112595963	0.206185567	99	0.18692084	0.209859757	1	48.72822759
M12528	6A	0	0.112693761	0.144329897	99	0.18692084	0.209847109	1	62.07920154
M2154	1D	418529908	0.112760014	0.432989691	99	0.18692084	0.209838547	1	67.60081594
M14312	7A	455466428	0.112789092	0.340206186	99	0.18692084	0.209834791	1	64.57681292
M7978	3B	762845618	0.112847886	0.030927835	99	0.18692084	0.2098272	1	-101.842346
M10366	5A	568062464	0.113007374	0.175257732	99	0.18692084	0.209806631	1	67.24024229
M1825	1B	0	0.113020629	0.329896907	99	0.18692084	0.209804923	1	53.51588785
M13343	6B	355137498	0.113067571	0.340206186	99	0.18692084	0.209798876	1	47.95083677
M9090	4A	692078422	0.113067809	0.175257732	99	0.18692084	0.209798845	1	-57.94259611
M4611	2B	0	0.113094629	0.298969072	99	0.18692084	0.209795391	1	-51.11320615
M9743	4D	136675461	0.113143542	0.082474227	99	0.18692084	0.209789095	1	-73.12745389
M10741	5B	356684358	0.113195566	0.144329897	99	0.18692084	0.209782401	1	56.95461947
M783	1B	530442292	0.113212752	0.402061856	99	0.18692084	0.209780191	1	-67.94483637
M6531	3A	640751875	0.113247505	0.175257732	99	0.18692084	0.209775722	1	61.70214101
M8121	3B	322735845	0.113416809	0.391752577	99	0.18692084	0.209753974	1	-66.2991778
M9904	5A	36740586	0.113485784	0.422680412	99	0.18692084	0.209745124	1	62.34057454
M9436	4A	0	0.1135719	0.494845361	99	0.18692084	0.209734084	1	-43.47687057
M5937	2D	747238713	0.113706958	0.237113402	99	0.18692084	0.209716787	1	-58.12630549
M6127	3A	19895266	0.113824355	0.288659794	99	0.18692084	0.209701771	1	-42.71766626
M4833	2B	733169296	0.113833915	0.226804124	99	0.18692084	0.209700549	1	58.55363299
M8353	3D	42679365	0.113905552	0.020618557	99	0.18692084	0.209691396	1	-134.0543724
M15404	7B	512354134	0.113905881	0.360824742	99	0.18692084	0.209691354	1	113.4585953
M1400	1B	520682469	0.113929271	0.381443299	99	0.18692084	0.209688366	1	42.73575882
M7460	3B	168137999	0.113971355	0.474226804	99	0.18692084	0.209682993	1	60.82479358
M866	1B	496978998	0.114158748	0.360824742	99	0.18692084	0.209659095	1	42.6392187
M6005	2D	642133932	0.114209765	0.350515464	99	0.18692084	0.209652596	1	-58.36881633
M6539	3A	662527377	0.114242498	0.484536082	99	0.18692084	0.209648428	1	-66.6414956
M7346	3B	73851126	0.114260726	0.113402062	99	0.18692084	0.209646108	1	61.70633707
M13872	6D	4373922	0.114293121	0.24742268	99	0.18692084	0.209641985	1	68.76126196
M475	1A	540664662	0.114585683	0.474226804	99	0.18692084	0.209604811	1	62.0670246
M3790	2B	16256106	0.114626935	0.154639175	99	0.18692084	0.209599578	1	62.90930952
M6601	3A	532690272	0.114678882	0.175257732	99	0.18692084	0.209592991	1	-54.97278407
M7682	3B	490515716	0.114834585	0.24742268	99	0.18692084	0.209573268	1	-45.43503455
M2830	2A	579584012	0.114839285	0.350515464	99	0.18692084	0.209572673	1	53.17258985
M10126	5A	480507460	0.114845719	0.340206186	99	0.18692084	0.209571859	1	94.90720227
M9672	4B	666331476	0.114890548	0.319587629	99	0.18692084	0.209566186	1	-44.56491979
M11556	5B	625701808	0.114909339	0.237113402	99	0.18692084	0.209563809	1	-48.612464
M9062	4A	4271248	0.114919475	0.453608247	99	0.18692084	0.209562527	1	-75.20803724
M10754	5B	388587448	0.114995883	0.237113402	99	0.18692084	0.209552868	1	60.13433316
M11422	5B	440938538	0.115003931	0.134020619	99	0.18692084	0.209551851	1	62.11191389
M5293	2B	795769053	0.115030461	0.257731959	99	0.18692084	0.209548499	1	-54.75774166
M1345	1B	214068731	0.115064109	0.226804124	99	0.18692084	0.209544248	1	51.06017729
M2421	2A	6320742	0.115069435	0.463917526	99	0.18692084	0.209543576	1	82.2180625
M6260	3A	35421181	0.11507205	0.226804124	99	0.18692084	0.209543246	1	55.90100493
M51	1A	1886980	0.115145155	0.360824742	99	0.18692084	0.209534017	1	-68.27094376
M14291	7A	16302848	0.115154204	0.453608247	99	0.18692084	0.209532875	1	-56.9413191
M944	1B	63461211	0.115321856	0.402061856	99	0.18692084	0.209511738	1	56.76397836
M2663	2A	120722528	0.115330295	0.360824742	99	0.18692084	0.209510675	1	57.5938671
M5855	2D	593510796	0.115354742	0.278350515	99	0.18692084	0.209507596	1	44.33426125
M93	1A	10241942	0.115440478	0.12371134	99	0.18692084	0.209496803	1	59.11038842
M11719	5B	658559745	0.115505854	0.381443299	99	0.18692084	0.20948858	1	-99.651425
M4514	2B	299291476	0.11557518	0.268041237	99	0.18692084	0.209479865	1	-60.85611794
M7159	3B	27998611	0.11558795	0.309278351	99	0.18692084	0.20947826	1	43.61963164
M4886	2B	337709850	0.115598006	0.309278351	99	0.18692084	0.209476997	1	80.04325058
M13377	6B	359069615	0.115601205	0.381443299	99	0.18692084	0.209476595	1	-56.71361136
M5251	2B	790887920	0.11560154	0.340206186	99	0.18692084	0.209476553	1	-68.69467105
M11969	5D	703088649	0.115670746	0.340206186	99	0.18692084	0.209467861	1	-56.15272766
M12678	6A	584911912	0.115773733	0.494845361	99	0.18692084	0.209454937	1	46.61879042
M3784	2B	91146822	0.11579952	0.144329897	99	0.18692084	0.209451704	1	-59.10683669
M470	1A	410991937	0.115843683	0.422680412	99	0.18692084	0.209446167	1	49.37084791
M758	1B	2358221	0.115863781	0.288659794	99	0.18692084	0.209443648	1	58.89628242
M6954	3B	10562725	0.116016062	0.268041237	99	0.18692084	0.209424579	1	-55.678252
M5004	2B	758802626	0.116031384	0.041237113	99	0.18692084	0.209422662	1	103.9152845
M4768	2B	729134454	0.116094314	0.494845361	99	0.18692084	0.209414791	1	40.00169726
M14138	7A	15781856	0.116241488	0.06185567	99	0.18692084	0.209396402	1	-78.05468851
M718	1B	5001690	0.116276971	0.268041237	99	0.18692084	0.209391973	1	75.37807213
M1890	1B	673741635	0.116478069	0.175257732	99	0.18692084	0.209366897	1	-63.47543651
M12605	6A	532657424	0.116545653	0.453608247	99	0.18692084	0.20935848	1	-46.15540566
M13912	6D	12019181	0.116567776	0.494845361	99	0.18692084	0.209355727	1	-57.04667178
M5983	2D	646478908	0.116610662	0.154639175	99	0.18692084	0.20935039	1	65.20485418
M11694	5B	0	0.116785389	0.06185567	99	0.18692084	0.20932867	1	-91.46588071
M2963	2A	0	0.116793947	0.474226804	99	0.18692084	0.209327607	1	-43.61683142
M3697	2B	68756048	0.116857791	0.103092784	99	0.18692084	0.20931968	1	61.89977896
M14201	7A	556299936	0.117054357	0.268041237	99	0.18692084	0.209295305	1	51.69494972
M666	1A	589629264	0.117111	0.175257732	99	0.18692084	0.20928829	1	-53.13183499
M9222	4A	720689979	0.117249564	0.278350515	99	0.18692084	0.209271145	1	44.27474917
M7524	3B	60366248	0.117322277	0.494845361	99	0.18692084	0.209262156	1	60.71968462
M14070	6D	451938140	0.117438387	0.298969072	99	0.18692084	0.209247817	1	52.8558438
M6621	3A	547633295	0.117483137	0.350515464	99	0.18692084	0.209242295	1	68.1904834
M9165	4A	710830242	0.117506382	0.257731959	99	0.18692084	0.209239427	1	61.8448504
M6157	3A	575259106	0.117603858	0.309278351	99	0.18692084	0.209227409	1	-52.13782376
M727	1B	3164636	0.117719931	0.494845361	99	0.18692084	0.209213112	1	63.71142376
M13332	6B	152196806	0.117758774	0.463917526	99	0.18692084	0.209208332	1	43.22051995
M3155	2A	757979334	0.117796356	0.484536082	99	0.18692084	0.209203708	1	55.49128521
M10851	5B	126862058	0.11780806	0.175257732	99	0.18692084	0.209202268	1	-54.48540689
M2710	2A	563950254	0.117840358	0.371134021	99	0.18692084	0.209198296	1	58.24931349
M6701	3A	712285937	0.11790397	0.319587629	99	0.18692084	0.209190477	1	-56.61798075
M7458	3B	257283671	0.118032575	0.226804124	99	0.18692084	0.209174683	1	57.53641392
M6959	3B	34156850	0.118127511	0.319587629	99	0.18692084	0.209163037	1	-57.24715706
M4	1A	6341226	0.118189882	0.216494845	99	0.18692084	0.209155391	1	-55.06101066
M10123	5A	480507460	0.118267485	0.381443299	99	0.18692084	0.209145884	1	62.24275858
M4492	2B	636565968	0.118313449	0.206185567	99	0.18692084	0.209140257	1	68.47403325
M4061	2B	0	0.118388512	0.319587629	99	0.18692084	0.209131072	1	-49.76857321
M6210	3A	577683980	0.118415557	0.082474227	99	0.18692084	0.209127764	1	-65.53582654
M1802	1B	653681729	0.118425638	0.18556701	99	0.18692084	0.209126531	1	57.68518431
M12903	6A	615775115	0.118461765	0.371134021	99	0.18692084	0.209122115	1	-39.73744853
M3739	2B	72162639	0.118501491	0.391752577	99	0.18692084	0.20911726	1	50.32190502
M8909	4A	651825178	0.118535952	0.268041237	99	0.18692084	0.20911305	1	63.72881245
M14601	7A	102061623	0.118544812	0.350515464	99	0.18692084	0.209111968	1	76.20693097
M14505	7A	55923161	0.118558249	0.360824742	99	0.18692084	0.209110326	1	-97.76015824
M8097	3B	702728099	0.118634298	0.453608247	99	0.18692084	0.209101042	1	54.39449353
M2509	2A	51108076	0.118678575	0.474226804	99	0.18692084	0.20909564	1	-50.67577823
M8231	3B	825992735	0.118783137	0.24742268	99	0.18692084	0.209082892	1	63.80736549
M6025	3A	7314381	0.118918744	0.309278351	99	0.18692084	0.209066377	1	-53.81069119
M4142	2B	108313448	0.118980174	0.18556701	99	0.18692084	0.209058903	1	50.16511376
M4747	2B	147968189	0.11898282	0.484536082	99	0.18692084	0.209058581	1	-61.01876241
M9138	4A	23511186	0.119179367	0.092783505	99	0.18692084	0.209034697	1	77.73662479
M11697	5B	626337103	0.119184008	0.020618557	99	0.18692084	0.209034133	1	141.0787389
M13192	6B	77434370	0.119298257	0.278350515	99	0.18692084	0.209020271	1	50.3726665
M15152	7A	711324304	0.119308462	0.484536082	99	0.18692084	0.209019033	1	50.21936504
M12113	6A	0	0.119433343	0.474226804	99	0.18692084	0.209003899	1	-43.51362628
M5817	2D	606164081	0.119547769	0.463917526	99	0.18692084	0.208990047	1	-63.46603045
M2308	1D	683382396	0.11960134	0.268041237	99	0.18692084	0.208983568	1	-48.69927395
M3767	2B	94165247	0.119607024	0.329896907	99	0.18692084	0.20898288	1	-90.09354231
M2986	2A	568886852	0.119648803	0.432989691	99	0.18692084	0.208977829	1	-54.07535056
M3156	2A	757979334	0.119657633	0.278350515	99	0.18692084	0.208976762	1	-69.04443986
M9145	4A	364049164	0.119755304	0.443298969	99	0.18692084	0.208964963	1	-70.79808473
M10685	5B	429836734	0.119781891	0.113402062	99	0.18692084	0.208961753	1	68.31832661
M310	1A	362317345	0.119857224	0.195876289	99	0.18692084	0.208952662	1	61.05548189
M6137	3A	286518666	0.119913253	0.072164948	99	0.18692084	0.208945904	1	-64.52842377
M3986	2B	182512821	0.119961137	0.402061856	99	0.18692084	0.208940132	1	79.1168091
M4590	2B	0	0.120051799	0.298969072	99	0.18692084	0.20892921	1	-58.5724371
M12728	6A	0	0.120056081	0.391752577	99	0.18692084	0.208928695	1	-52.21981898
M673	1A	0	0.120211443	0.329896907	99	0.18692084	0.208910001	1	-43.34044807
M9029	4A	48707567	0.120231804	0.350515464	99	0.18692084	0.208907553	1	140.9591196
M2973	2A	541992663	0.120301595	0.463917526	99	0.18692084	0.208899166	1	-44.6331769
M2859	2A	565262524	0.120341475	0.391752577	99	0.18692084	0.208894376	1	38.78662324
M13546	6B	479212545	0.120363735	0.144329897	99	0.18692084	0.208891703	1	57.00741286
M5074	2B	769895997	0.120383962	0.484536082	99	0.18692084	0.208889275	1	-46.85578625
M12963	6B	0	0.120427827	0.494845361	99	0.18692084	0.20888401	1	-63.04923983
M11759	5B	681127665	0.120503807	0.494845361	99	0.18692084	0.208874896	1	68.11277812
M10921	5B	455980608	0.120525667	0.092783505	99	0.18692084	0.208872276	1	-75.07631063
M5382	2D	16719597	0.120549404	0.103092784	99	0.18692084	0.20886943	1	-65.41603684
M9091	4A	690936373	0.120560055	0.309278351	99	0.18692084	0.208868154	1	-73.93496246
M4242	2B	222586269	0.12056105	0.06185567	99	0.18692084	0.208868034	1	83.95253276
M13427	6B	531523075	0.120617227	0.453608247	99	0.18692084	0.208861304	1	66.03704384
M6162	3A	15976105	0.120728302	0.494845361	99	0.18692084	0.208848006	1	-61.95866095
M6338	3A	345660743	0.120739043	0.195876289	99	0.18692084	0.208846721	1	-55.44572668
M4141	2B	108313448	0.120752964	0.350515464	99	0.18692084	0.208845055	1	-95.66776751
M14857	7A	675060109	0.120756871	0.24742268	99	0.18692084	0.208844588	1	-51.62736922
M13374	6B	159138986	0.120848623	0.237113402	99	0.18692084	0.208833617	1	-66.52132979
M6771	3A	0	0.120924163	0.154639175	99	0.18692084	0.208824591	1	-59.9378526
M3998	2B	0	0.121004595	0.134020619	99	0.18692084	0.208814988	1	62.99776291
M403	1A	508571576	0.121240345	0.237113402	99	0.18692084	0.208786882	1	56.96380239
M5184	2B	781773910	0.121363538	0.422680412	99	0.18692084	0.20877222	1	-48.34949023
M2445	2A	20323654	0.121381647	0.463917526	99	0.18692084	0.208770066	1	-79.96867522
M14914	7A	699146276	0.121432677	0.134020619	99	0.18692084	0.208763998	1	-61.41192654
M14353	7A	23895115	0.121502152	0.06185567	99	0.18692084	0.208755742	1	-80.85983962
M11193	5B	423502194	0.121518746	0.453608247	99	0.18692084	0.20875377	1	40.95517133
M6348	3A	478681812	0.121557427	0.381443299	99	0.18692084	0.208749177	1	-46.30865635
M6448	3A	523316233	0.121622739	0.24742268	99	0.18692084	0.208741424	1	47.35744599
M13518	6B	635173407	0.121655249	0.381443299	99	0.18692084	0.208737567	1	53.35054148
M6636	3A	292579611	0.121810607	0.381443299	99	0.18692084	0.208719149	1	97.53227681
M7422	3B	434047988	0.121828134	0.381443299	99	0.18692084	0.208717073	1	85.63341253
M12447	6A	0	0.121968921	0.391752577	99	0.18692084	0.208700409	1	87.41380546
M1283	1B	392145668	0.121970246	0.360824742	99	0.18692084	0.208700252	1	-60.43349509
M13910	6D	10760221	0.121989557	0.350515464	99	0.18692084	0.208697968	1	52.54510085
M485	1A	339729738	0.12203925	0.195876289	99	0.18692084	0.208692093	1	69.57046604
M66	1A	542326485	0.122187677	0.381443299	99	0.18692084	0.208674559	1	-98.74004712
M10222	5A	503872534	0.122241365	0.041237113	99	0.18692084	0.208668223	1	75.29703777
M15447	7B	582709177	0.122317583	0.340206186	99	0.18692084	0.208659233	1	52.1148712
M2195	1D	420566675	0.122396613	0.360824742	99	0.18692084	0.208649918	1	-73.30905787
M5968	2D	644662016	0.122489595	0.041237113	99	0.18692084	0.208638967	1	94.95576609
M5866	2D	601604653	0.122497509	0.144329897	99	0.18692084	0.208638036	1	-50.53991102
M4519	2B	680237252	0.122546661	0.154639175	99	0.18692084	0.208632251	1	-56.28686649
M6917	3B	0	0.122547392	0.484536082	99	0.18692084	0.208632165	1	69.53866156
M13882	6D	452928272	0.12263745	0.226804124	99	0.18692084	0.208621573	1	73.59568695
M11862	5B	700001961	0.122784172	0.216494845	99	0.18692084	0.208604336	1	-70.0372594
M11873	5B	345216433	0.122903788	0.226804124	99	0.18692084	0.2085903	1	73.37076715
M4950	2B	753792974	0.123021024	0.12371134	99	0.18692084	0.208576559	1	-70.49704036
M11642	5B	486192860	0.123050753	0.463917526	99	0.18692084	0.208573077	1	-63.41576802
M4558	2B	51589506	0.123090562	0.309278351	99	0.18692084	0.208568415	1	-46.02229138
M77	1A	14189304	0.123155195	0.402061856	99	0.18692084	0.20856085	1	-88.78846702
M9172	4A	709851770	0.12318609	0.18556701	99	0.18692084	0.208557236	1	-60.75309871
M14108	6D	463784578	0.123229843	0.484536082	99	0.18692084	0.208552119	1	58.51889252
M15138	7A	736378833	0.123236155	0.329896907	99	0.18692084	0.208551381	1	86.52653855
M5790	2D	595557034	0.123288668	0.391752577	99	0.18692084	0.208545243	1	61.58479722
M13272	6B	106985833	0.123324601	0.020618557	99	0.18692084	0.208541044	1	134.3634197
M1610	1B	585076021	0.123532625	0.030927835	99	0.18692084	0.208516765	1	-98.65445676
M13927	6D	14510861	0.123557225	0.340206186	99	0.18692084	0.208513897	1	63.36237922
M9915	5A	42684379	0.1236406	0.484536082	99	0.18692084	0.208504181	1	-45.7854978
M9568	4B	441057932	0.123836206	0.422680412	99	0.18692084	0.208481416	1	-43.08697999
M3333	2A	794426530	0.123841049	0.298969072	99	0.18692084	0.208480853	1	-47.65337286
M6523	3A	481067173	0.124026356	0.463917526	99	0.18692084	0.208459324	1	-66.44333456
M12305	6A	0	0.124084478	0.134020619	99	0.18692084	0.208452579	1	-55.74663841
M3287	2A	642478723	0.124111901	0.412371134	99	0.18692084	0.208449398	1	68.5807505
M10742	5B	356684358	0.124223466	0.319587629	99	0.18692084	0.208436464	1	-147.060249
M1564	1B	429473737	0.124237141	0.24742268	99	0.18692084	0.20843488	1	52.20796791
M12142	6A	6562899	0.124422969	0.041237113	99	0.18692084	0.208413368	1	99.19562917
M11083	5B	0	0.124453987	0.051546392	99	0.18692084	0.208409781	1	92.93644474
M2746	2A	202049821	0.12450941	0.175257732	99	0.18692084	0.208403374	1	-81.09345321
M6578	3A	660003685	0.124615536	0.381443299	99	0.18692084	0.208391115	1	-51.48250679
M15263	7B	132741570	0.124617702	0.319587629	99	0.18692084	0.208390865	1	42.50948182
M13331	6B	152196806	0.124646837	0.350515464	99	0.18692084	0.208387502	1	43.24947351
M7284	3B	48788274	0.124871993	0.402061856	99	0.18692084	0.208361539	1	-54.78566151
M1368	1B	392431722	0.124892837	0.041237113	99	0.18692084	0.208359138	1	-90.38708392
M6389	3A	521790629	0.124896629	0.113402062	99	0.18692084	0.208358701	1	-56.04791892
M14832	7A	664701768	0.124970962	0.06185567	99	0.18692084	0.208350143	1	68.67025572
M14833	7A	663768828	0.124970962	0.06185567	99	0.18692084	0.208350143	1	68.67025572
M12433	6A	61874990	0.124990621	0.082474227	99	0.18692084	0.208347881	1	-83.68484144
M5456	2D	58726921	0.125029859	0.154639175	99	0.18692084	0.208343367	1	58.24931969
M1103	1B	262341897	0.125049504	0.298969072	99	0.18692084	0.208341107	1	101.0026868
M12370	6A	37394584	0.125131394	0.371134021	99	0.18692084	0.208331692	1	-49.11098657
M14516	7A	57742411	0.125133267	0.391752577	99	0.18692084	0.208331477	1	41.59288565
M4780	2B	730646260	0.1251831	0.371134021	99	0.18692084	0.208325752	1	96.09465977
M9835	5A	5650428	0.12527248	0.340206186	99	0.18692084	0.208315489	1	50.44990341
M7299	3B	19380506	0.125298538	0.010309278	99	0.18692084	0.208312498	1	-135.6970793
M10840	5B	454180549	0.125357115	0.030927835	99	0.18692084	0.208305778	1	-94.45719065
M309	1A	362317345	0.125399458	0.216494845	99	0.18692084	0.208300923	1	-55.96799934
M5102	2B	0	0.125466435	0.06185567	99	0.18692084	0.208293246	1	73.63935332
M4976	2B	675190488	0.125472856	0.206185567	99	0.18692084	0.208292511	1	-56.77114478
M945	1B	142510802	0.125525467	0.082474227	99	0.18692084	0.208286484	1	-69.23771943
M3721	2B	49874133	0.125663	0.041237113	99	0.18692084	0.208270744	1	90.59713201
M9896	5A	82132019	0.125668877	0.051546392	99	0.18692084	0.208270072	1	78.00570276
M4990	2B	620271002	0.125670907	0.051546392	99	0.18692084	0.20826984	1	-91.34424081
M14149	7A	455502	0.125696501	0.422680412	99	0.18692084	0.208266913	1	-63.7339076
M878	1B	22152407	0.125753295	0.329896907	99	0.18692084	0.208260421	1	-53.74597575
M3737	2B	44609696	0.125842137	0.010309278	99	0.18692084	0.208250272	1	170.1137096
M5107	2B	0	0.125842137	0.010309278	99	0.18692084	0.208250272	1	-170.1137096
M7114	3B	22453000	0.125875759	0.422680412	99	0.18692084	0.208246433	1	47.65765335
M10849	5B	664263082	0.125954327	0.24742268	99	0.18692084	0.208237467	1	51.21750076
M9705	4B	86304081	0.126031942	0.350515464	99	0.18692084	0.208228616	1	68.44599579
M12440	6A	243916466	0.126075847	0.113402062	99	0.18692084	0.208223612	1	-62.1046328
M2562	2A	449058373	0.1262262	0.340206186	99	0.18692084	0.208206491	1	54.77201991
M4759	2B	0	0.126252718	0.432989691	99	0.18692084	0.208203473	1	-67.9658677
M13247	6B	178019384	0.126261555	0.381443299	99	0.18692084	0.208202468	1	-45.81579355
M5592	2D	739690772	0.126469555	0.494845361	99	0.18692084	0.208178827	1	47.93911253
M4381	2B	544259861	0.126676994	0.484536082	99	0.18692084	0.208155294	1	-44.96988362
M15398	7B	522729143	0.127026997	0.432989691	99	0.18692084	0.208115686	1	-53.70265272
M2910	2A	677497860	0.127062757	0.175257732	99	0.18692084	0.208111646	1	56.16233855
M8845	4A	618529609	0.127122643	0.298969072	99	0.18692084	0.208104883	1	79.28654412
M7280	3B	0	0.127145691	0.319587629	99	0.18692084	0.208102282	1	-105.3989174
M31	1A	7078505	0.127245888	0.092783505	99	0.18692084	0.208090977	1	-70.43235684
M5219	2B	0	0.127321058	0.381443299	99	0.18692084	0.208082503	1	45.97076213
M890	1B	630581864	0.127330853	0.402061856	99	0.18692084	0.2080814	1	-68.88991963
M14430	7A	0	0.127342715	0.226804124	99	0.18692084	0.208080063	1	42.98816611
M12713	6A	583292509	0.127359527	0.494845361	99	0.18692084	0.208078169	1	-54.56368544
M12326	6A	0	0.127462249	0.474226804	99	0.18692084	0.208066602	1	45.37041732
M8882	4A	632945628	0.127518969	0.072164948	99	0.18692084	0.208060219	1	-75.33201683
M14319	7A	0	0.127538677	0.278350515	99	0.18692084	0.208058003	1	49.48103518
M5141	2B	785074409	0.127629366	0.422680412	99	0.18692084	0.208047806	1	-80.36303411
M1666	1B	588503113	0.127837983	0.422680412	99	0.18692084	0.208024382	1	-38.4818346
M328	1A	480826950	0.127852807	0.051546392	99	0.18692084	0.208022719	1	74.12000461
M8059	3B	781113311	0.128042672	0.134020619	99	0.18692084	0.208001441	1	-65.0530324
M8666	4A	125344732	0.128145888	0.329896907	99	0.18692084	0.207989888	1	112.5795897
M10507	5A	680532072	0.12815067	0.422680412	99	0.18692084	0.207989353	1	50.64509322
M9968	5A	283796742	0.128248618	0.144329897	99	0.18692084	0.207978401	1	-57.00290925
M7731	3B	696333527	0.128274347	0.268041237	99	0.18692084	0.207975525	1	64.99340573
M4885	2B	337709850	0.128279055	0.432989691	99	0.18692084	0.207974999	1	-44.01908519
M5709	2D	0	0.128317478	0.309278351	99	0.18692084	0.207970706	1	65.04241304
M7244	3B	0	0.128322259	0.453608247	99	0.18692084	0.207970172	1	40.91282642
M5067	2B	706995991	0.128360804	0.474226804	99	0.18692084	0.207965867	1	-59.59667232
M7926	3B	552736382	0.128424933	0.072164948	99	0.18692084	0.207958709	1	75.21499581
M194	1A	489600357	0.128448265	0.484536082	99	0.18692084	0.207956105	1	50.88606452
M9826	5A	0	0.128702108	0.329896907	99	0.18692084	0.207927814	1	51.15177439
M14639	7A	131108912	0.128847144	0.051546392	99	0.18692084	0.207911677	1	-89.96909386
M1036	1B	46096564	0.128858995	0.030927835	99	0.18692084	0.20791036	1	116.1050636
M14997	7A	83521448	0.128929511	0.432989691	99	0.18692084	0.207902523	1	44.74951119
M13313	6B	452530948	0.12896524	0.494845361	99	0.18692084	0.207898553	1	-60.75458373
M5145	2B	781107698	0.129080428	0.412371134	99	0.18692084	0.207885766	1	-79.64862752
M1168	1B	34945936	0.129139866	0.082474227	99	0.18692084	0.207879172	1	67.49859603
M9928	5A	346214767	0.129144506	0.237113402	99	0.18692084	0.207878658	1	-47.35755969
M9598	4B	581078619	0.129172605	0.175257732	99	0.18692084	0.207875542	1	61.01231328
M7402	3B	592199044	0.129207604	0.12371134	99	0.18692084	0.207871662	1	53.5296692
M3647	2B	46670271	0.129228943	0.443298969	99	0.18692084	0.207869297	1	-57.95412209
M2969	2A	703879878	0.129304941	0.051546392	99	0.18692084	0.207860879	1	81.74353788
M13617	6B	683559271	0.129522327	0.381443299	99	0.18692084	0.207836828	1	58.9021532
M11876	5B	707477330	0.129603837	0.340206186	99	0.18692084	0.207827822	1	186.7227597
M3469	2B	20273047	0.129603837	0.340206186	99	0.18692084	0.207827822	1	186.7227597
M6951	3B	10046792	0.129603837	0.340206186	99	0.18692084	0.207827822	1	186.7227597
M12453	6A	115329227	0.129790231	0.391752577	99	0.18692084	0.207807251	1	100.7223002
M12490	6A	82038144	0.129790231	0.391752577	99	0.18692084	0.207807251	1	100.7223002
M5714	2D	610403424	0.129901277	0.195876289	99	0.18692084	0.207795011	1	-53.56667594
M12497	6A	421534410	0.129918355	0.371134021	99	0.18692084	0.20779313	1	-51.09290756
M9417	4A	740144144	0.130052686	0.18556701	99	0.18692084	0.207778342	1	-67.14850793
M8822	4A	132119668	0.130054533	0.206185567	99	0.18692084	0.207778139	1	50.6371074
M10717	5B	75319717	0.130084727	0.360824742	99	0.18692084	0.207774818	1	-79.06225107
M9430	4A	439294228	0.130130636	0.226804124	99	0.18692084	0.207769769	1	-64.94785938
M13829	6B	470111441	0.130275853	0.226804124	99	0.18692084	0.207753813	1	53.54144843
M3361	2A	0	0.130306009	0.412371134	99	0.18692084	0.207750502	1	75.49804696
M2846	2A	542687135	0.130374401	0.288659794	99	0.18692084	0.207742996	1	-41.11957908
M14254	7A	0	0.130418129	0.103092784	99	0.18692084	0.2077382	1	-78.60074409
M11317	5B	373116658	0.130597786	0.226804124	99	0.18692084	0.207718512	1	-48.02458033
M14926	7A	699922650	0.130708785	0.298969072	99	0.18692084	0.207706363	1	47.3845805
M6996	3B	0	0.130912765	0.298969072	99	0.18692084	0.207684068	1	-51.27495707
M15163	7B	1747393	0.131248892	0.175257732	99	0.18692084	0.207647416	1	-51.92386569
M13121	6B	52077541	0.131276284	0.134020619	99	0.18692084	0.207644434	1	55.65192512
M13308	6B	437468761	0.131281342	0.432989691	99	0.18692084	0.207643883	1	-47.33118632
M10098	5A	471711764	0.131393276	0.391752577	99	0.18692084	0.207631704	1	41.10493504
M4909	2B	64103817	0.131442493	0.371134021	99	0.18692084	0.207626353	1	-65.28190139
M7419	3B	367482313	0.131552399	0.072164948	99	0.18692084	0.207614411	1	-68.08657007
M13097	6B	26841451	0.131649793	0.298969072	99	0.18692084	0.207603839	1	-65.39512633
M5947	2D	651419153	0.131661423	0.350515464	99	0.18692084	0.207602577	1	50.08722157
M12260	6A	16376378	0.131689663	0.092783505	99	0.18692084	0.207599513	1	-81.0973202
M9933	5A	139519642	0.131699022	0.329896907	99	0.18692084	0.207598498	1	-41.80830711
M5800	2D	732568622	0.131737983	0.412371134	99	0.18692084	0.207594273	1	51.74018398
M1655	1B	589090638	0.1318328	0.288659794	99	0.18692084	0.207583996	1	63.37662135
M13445	6B	12671031	0.131860972	0.371134021	99	0.18692084	0.207580944	1	49.21443749
M14485	7A	13379407	0.131871004	0.082474227	99	0.18692084	0.207579858	1	-69.40258307
M2300	1D	485043556	0.131902383	0.432989691	99	0.18692084	0.20757646	1	-53.43594694
M15361	7B	159301016	0.131935321	0.474226804	99	0.18692084	0.207572894	1	-62.3892823
M9950	5A	69140651	0.131978233	0.175257732	99	0.18692084	0.20756825	1	-45.67836884
M8705	4A	25985745	0.131993579	0.422680412	99	0.18692084	0.20756659	1	56.73784916
M2243	1D	462948307	0.132004335	0.463917526	99	0.18692084	0.207565426	1	-92.86174662
M12135	6A	5480626	0.132125398	0.484536082	99	0.18692084	0.207552336	1	-55.26196137
M5651	2D	694059807	0.132177269	0.216494845	99	0.18692084	0.207546732	1	-44.37541265
M2899	2A	49655671	0.132192056	0.432989691	99	0.18692084	0.207545135	1	48.79705009
M2543	2A	43291957	0.132235378	0.340206186	99	0.18692084	0.207540457	1	-66.01658092
M13074	6B	39341325	0.132391117	0.154639175	99	0.18692084	0.207523653	1	57.55285754
M14632	7A	128909455	0.132413363	0.144329897	99	0.18692084	0.207521255	1	-65.62265502
M12654	6A	467438683	0.132415135	0.432989691	99	0.18692084	0.207521064	1	41.09119133
M5513	2D	82867197	0.132579249	0.350515464	99	0.18692084	0.207503385	1	-72.9144849
M4616	2B	91473909	0.132795888	0.216494845	99	0.18692084	0.207480086	1	47.95792287
M2635	2A	521507148	0.132818343	0.195876289	99	0.18692084	0.207477673	1	57.76658032
M11752	5B	679651559	0.13320097	0.391752577	99	0.18692084	0.207436635	1	-68.05359423
M3593	2B	506395762	0.133263498	0.432989691	99	0.18692084	0.207429942	1	-40.36993083
M6811	3A	600135047	0.13326426	0.402061856	99	0.18692084	0.20742986	1	-74.05751801
M12573	6A	524836376	0.133289176	0.350515464	99	0.18692084	0.207427194	1	48.54810145
M12063	6A	62362905	0.133499832	0.237113402	99	0.18692084	0.207404674	1	61.83906687
M8846	4A	618529609	0.133912731	0.443298969	99	0.18692084	0.207360651	1	-47.99660089
M11390	5B	437451308	0.134034191	0.154639175	99	0.18692084	0.207347731	1	56.40744192
M6293	3A	53554917	0.134120775	0.402061856	99	0.18692084	0.207338528	1	-76.08299183
M1819	1B	346227510	0.134203	0.463917526	99	0.18692084	0.207329795	1	78.26371205
M7167	3B	12472891	0.134221742	0.309278351	99	0.18692084	0.207327805	1	-44.2110425
M8133	3B	303789579	0.134250683	0.371134021	99	0.18692084	0.207324734	1	-50.6423781
M6719	3A	714455841	0.134259271	0.371134021	99	0.18692084	0.207323822	1	-44.01820365
M111	1A	329686048	0.134328144	0.443298969	99	0.18692084	0.207316516	1	-45.26418745
M14458	7A	38327804	0.134349037	0.443298969	99	0.18692084	0.2073143	1	-54.50488171
M13319	6B	442429891	0.134393155	0.154639175	99	0.18692084	0.207309622	1	-61.26245625
M10354	5A	513747652	0.1344063	0.18556701	99	0.18692084	0.207308229	1	61.40393322
M13940	6D	18528639	0.134487678	0.298969072	99	0.18692084	0.207299607	1	-49.37453822
[truncated: 13,601 more rows]
