# Supplementary material for: Genome-wide association study of drought tolerance and biomass allocation in wheat
Source: PLoS One. 2019 Dec 4;14(12):e0225383. doi: 10.1371/journal.pone.0225383 (PMC6892492; doi:10.1371/journal.pone.0225383)
Supplement: S13 Table — (CSV) [file pone.0225383.s013.csv]

SNP	Chromosome	Position	P.value	maf	nobs	Rsquare.of.Model.without.SNP	Rsquare.of.Model.with.SNP	FDR_Adjusted_P-values	effect
M9776	4D	442739513	3.55E-05	0.298969072	99	0.029485141	0.231523329	0.050640762	-72.26218454
M9759	4D	300724319	0.000339873	0.24742268	99	0.029485141	0.177503293	0.030369367	70.42633118
M9164	4A	348257403	0.000479565	0.103092784	99	0.029485141	0.169570171	0.023720974	72.5734842
M9806	4D	250840711	0.000498172	0.402061856	99	0.029485141	0.168698086	0.029153433	-60.11717618
M1278	1B	379091249	0.000545118	0.340206186	99	0.029485141	0.166638879	0.013464437	-130.4008488
M9769	4D	417815115	0.000553918	0.134020619	99	0.029485141	0.166273324	0.038557148	74.69254929
M440	1A	530199695	0.000570656	0.494845361	99	0.029485141	0.165594192	0.048881681	45.94830295
M9808	4D	328559907	0.000712993	0.422680412	99	0.029485141	0.160533659	0.01021339	-50.15287726
M11851	5B	697526370	0.000967209	0.309278351	99	0.029485141	0.153660393	0.018381841	65.84758697
M9813	4D	507006414	0.001423655	0.257731959	99	0.029485141	0.145042972	0.009653941	58.01423642
M1468	1B	0	0.00163277	0.164948454	99	0.029485141	0.142013959	0.019076592	-61.03030508
M3662	2B	56189523	0.001634433	0.268041237	99	0.029485141	0.141991511	0.052445655	50.55723699
M9068	4A	686897296	0.001658636	0.278350515	99	0.029485141	0.141667471	0.063198014	77.27888078
M11936	5D	472425065	0.001694174	0.092783505	99	0.029485141	0.141200412	0.085570061	72.18180353
M9756	4D	220375714	0.001698629	0.092783505	99	0.029485141	0.141142578	0.064339855	75.3203812
M667	1A	583451068	0.001969568	0.18556701	99	0.029485141	0.137891715	0.055741611	-51.84683319
M15078	7A	712982088	0.002023803	0.371134021	99	0.029485141	0.137296795	0.043601127	-68.60487164
M14662	7A	134621823	0.002120574	0.298969072	99	0.029485141	0.136275152	0.049366523	-45.76716437
M3911	2B	63622881	0.002170377	0.360824742	99	0.029485141	0.135768011	0.053291119	67.32218529
M1908	1B	677573018	0.002280677	0.298969072	99	0.029485141	0.134686418	0.07124817	42.78574101
M13346	6B	486549528	0.002448755	0.350515464	99	0.029485141	0.133138204	0.047843549	44.40840428
M426	1A	507936918	0.002498584	0.257731959	99	0.029485141	0.1327003	0.090244854	-51.06694857
M7547	3B	498344378	0.002531644	0.350515464	99	0.029485141	0.132414732	0.06417197	91.90920662
M9061	4A	4271248	0.00265088	0.206185567	99	0.029485141	0.131415929	0.062243606	48.26970526
M12831	6A	604445823	0.002728719	0.309278351	99	0.029485141	0.130788683	0.046478444	95.3829618
M9784	4D	64192874	0.00284563	0.371134021	99	0.029485141	0.129880588	0.044582599	-52.4456548
M9251	4A	14922497	0.002866452	0.371134021	99	0.029485141	0.129722912	0.105652255	63.198014
M4525	2B	547273650	0.002870322	0.350515464	99	0.029485141	0.129693741	0.105652255	85.57006139
M11862	5B	700001961	0.00288579	0.216494845	99	0.029485141	0.129577537	0.11005093	64.3398552
M14621	7A	115321592	0.002891483	0.463917526	99	0.029485141	0.129534932	0.113674515	-55.74161083
M431	1A	585075445	0.002892741	0.463917526	99	0.029485141	0.12952553	0.084332633	43.60112674
M9724	4D	1206063	0.002903807	0.309278351	99	0.029485141	0.129442997	0.088163997	-49.36652317
M1097	1B	102154959	0.002985892	0.494845361	99	0.029485141	0.128840795	0.081733115	53.29111924
M6427	3A	517095336	0.003194679	0.103092784	99	0.029485141	0.127383206	0.10789843	-71.24817048
M14715	7A	218119745	0.003242074	0.329896907	99	0.029485141	0.12706609	0.095460309	47.84354893
M13166	6B	109155311	0.003573257	0.041237113	99	0.029485141	0.124975968	0.083811808	90.24485404
M13598	6B	675620421	0.003859339	0.082474227	99	0.029485141	0.12332625	0.067057593	-64.17197037
M1658	1B	73116851	0.004002946	0.278350515	99	0.029485141	0.122545347	0.109717716	-62.24360565
M3057	2A	729494667	0.004278901	0.463917526	99	0.029485141	0.121123202	0.082203214	-46.47844378
M9827	5A	2104451	0.00429602	0.319587629	99	0.029485141	0.121038139	0.075328044	-44.58259919
M991	1B	105260223	0.004456772	0.350515464	99	0.029485141	0.120256136	0.071883264	105.6522549
M996	1B	344338837	0.004456772	0.350515464	99	0.029485141	0.120256136	0.085847492	-105.6522549
M1044	1B	608745963	0.00450366	0.391752577	99	0.029485141	0.120033552	0.086722861	-66.03055773
M13985	6D	220740379	0.004508606	0.206185567	99	0.029485141	0.120010213	0.120155462	-68.20470927
M2819	2A	559553702	0.004594629	0.134020619	99	0.029485141	0.119608492	0.117390886	50.59957979
M474	1A	544077560	0.004676813	0.134020619	99	0.029485141	0.11923193	0.079413649	52.89839805
M1053	1B	3440095	0.004696831	0.484536082	99	0.029485141	0.119141249	0.102956584	-49.03986919
M5006	2B	0	0.004722302	0.350515464	99	0.029485141	0.119026448	0.129926003	64.73905826
M12981	6B	6682335	0.005015421	0.443298969	99	0.029485141	0.117749767	0.079997569	57.27618567
M9757	4D	336833285	0.005021278	0.484536082	99	0.029485141	0.117725053	0.065040653	50.28708478
M1382	1B	458326189	0.005073008	0.432989691	99	0.029485141	0.117508071	0.064553324	40.23455604
M6757	3A	338240084	0.005098628	0.381443299	99	0.029485141	0.117401462	0.07893636	65.83062934
M9783	4D	64192874	0.005172084	0.371134021	99	0.029485141	0.11709885	0.107724684	49.32192857
M9826	5A	0	0.005220057	0.329896907	99	0.029485141	0.116903622	0.136326523	45.19682668
M9305	4A	729822223	0.005239613	0.402061856	99	0.029485141	0.11682457	0.069307016	43.12995811
M5208	2B	776263331	0.005504241	0.154639175	99	0.029485141	0.115784057	0.120436974	-51.50849529
M9092	4A	690936373	0.005643967	0.144329897	99	0.029485141	0.115255446	0.117377219	-52.03371675
M2263	1D	472374775	0.005679979	0.443298969	99	0.029485141	0.115121413	0.120955807	72.09327709
M1064	1B	383910913	0.005683508	0.06185567	99	0.029485141	0.115108326	0.100195294	70.43453186
M14617	7A	116622717	0.005876014	0.288659794	99	0.029485141	0.114406937	0.217334748	47.64818953
M2729	2A	179992753	0.006212882	0.18556701	99	0.029485141	0.113235234	0.124487582	61.77395019
M6038	3A	488385956	0.006275449	0.051546392	99	0.029485141	0.113024908	0.076580505	-77.95560158
M5926	2D	608375215	0.006289222	0.18556701	99	0.029485141	0.112978899	0.083588129	47.99854149
M13994	6D	125238328	0.006298922	0.371134021	99	0.029485141	0.112946563	0.109745978	39.02439202
M14767	7A	620199584	0.00631684	0.391752577	99	0.029485141	0.112886962	0.096690394	38.73199444
M4164	2B	680760736	0.00644073	0.175257732	99	0.029485141	0.112479622	0.101717175	47.36181601
M3722	2B	49874133	0.006559083	0.072164948	99	0.029485141	0.112098032	0.084262062	64.63481065
M11878	5B	712050597	0.006735392	0.06185567	99	0.029485141	0.11154268	0.128798135	-81.79591379
M13893	6D	7194101	0.006861503	0.391752577	99	0.029485141	0.111154651	0.120303006	-41.58420941
M7647	3B	597784664	0.006894511	0.216494845	99	0.029485141	0.111054317	0.091696034	55.01762013
M5976	2D	0	0.006939663	0.443298969	99	0.029485141	0.110917874	0.107243032	64.3458191
M10623	5B	470106533	0.007137815	0.113402062	99	0.029485141	0.110329823	0.09461104	56.76662406
M4438	2B	658484745	0.007203826	0.422680412	99	0.029485141	0.110137694	0.064077416	-38.44644989
M2215	1D	435046048	0.007345933	0.412371134	99	0.029485141	0.109730236	0.072010492	-43.20629492
M6128	3A	19895266	0.007419992	0.443298969	99	0.029485141	0.10952113	0.080550355	48.33021293
M14710	7A	306628299	0.007621465	0.360824742	99	0.029485141	0.108963099	0.073688243	-44.21294602
M9982	5A	59566378	0.00767703	0.484536082	99	0.029485141	0.108811902	0.082674834	49.60490023
M1257	1B	390280239	0.007694494	0.371134021	99	0.029485141	0.108764615	0.140186318	-84.11179052
M13102	6B	34162206	0.007858619	0.412371134	99	0.029485141	0.108325618	0.119163687	71.49821196
M14008	6D	89723576	0.007879619	0.340206186	99	0.029485141	0.108270138	0.265700537	159.420322
M14190	7A	20772971	0.007879619	0.340206186	99	0.029485141	0.108270138	0.265700537	-159.420322
M11833	5B	113768715	0.007920823	0.422680412	99	0.029485141	0.108161728	0.09275342	55.6520519
M9751	4D	64710758	0.007954876	0.484536082	99	0.029485141	0.108072576	0.089024135	-53.4144812
M14731	7A	516152042	0.007963373	0.206185567	99	0.029485141	0.108050393	0.079648551	47.78913031
M3652	2B	53458522	0.008089327	0.309278351	99	0.029485141	0.107724425	0.060038156	-36.0228935
M4682	2B	706398142	0.008175647	0.288659794	99	0.029485141	0.10750407	0.065949293	39.56957608
M10014	5A	329278691	0.008286122	0.206185567	99	0.029485141	0.107225567	0.065785823	39.4714935
M6753	3A	464718567	0.00829205	0.113402062	99	0.029485141	0.107210734	0.082502215	-49.50132884
M12942	6A	75182853	0.008332391	0.463917526	99	0.029485141	0.107110075	0.091034332	-54.62059911
M6021	3A	8232937	0.008334782	0.360824742	99	0.029485141	0.107104124	0.141040409	84.62424554
M6843	3A	805255592	0.008368867	0.319587629	99	0.029485141	0.107019496	0.079787921	47.87275278
M6789	3A	722406355	0.00843748	0.371134021	99	0.029485141	0.106850227	0.112619444	-67.5716666
M10621	5B	4826033	0.008492476	0.278350515	99	0.029485141	0.106715583	0.067168303	-40.30098185
M9794	4D	403180673	0.008633748	0.278350515	99	0.029485141	0.106373841	0.076029944	45.61796636
M8351	3D	42633957	0.008647259	0.494845361	99	0.029485141	0.106341464	0.072144314	-43.28658832
M5660	2D	620224144	0.008679102	0.309278351	99	0.029485141	0.106265364	0.05943456	35.66073576
M5246	2B	796600262	0.008697403	0.051546392	99	0.029485141	0.10622176	0.119280718	71.56843104
M5288	2B	0	0.008697403	0.051546392	99	0.029485141	0.10622176	0.119280718	71.56843104
M7488	3B	518153058	0.008874663	0.103092784	99	0.029485141	0.105804303	0.086504282	51.90256929
M7169	3B	37403983	0.008909876	0.329896907	99	0.029485141	0.105722411	0.178650167	107.1901002
M10053	5A	0	0.009003114	0.484536082	99	0.029485141	0.105507196	0.061164259	36.69855518
M11011	5B	487440576	0.009030952	0.18556701	99	0.029485141	0.10544339	0.088362055	-53.01723306
M1036	1B	46096564	0.009319642	0.030927835	99	0.029485141	0.104793556	0.169507895	101.7047371
M10091	5A	473321191	0.009495778	0.391752577	99	0.029485141	0.10440732	0.061872949	37.12376954
M13966	6D	27046183	0.009586155	0.206185567	99	0.029485141	0.104212034	0.092915901	-55.74954043
M9971	5A	63268470	0.009982304	0.484536082	99	0.029485141	0.103378137	0.080648397	-48.3890381
M14361	7A	669206467	0.010006389	0.010309278	99	0.029485141	0.103328557	0.249246188	149.5477126
M360	1A	641985039	0.010006389	0.010309278	99	0.029485141	0.103328557	0.249246188	149.5477126
M7803	3B	720217864	0.010006389	0.010309278	99	0.029485141	0.103328557	0.249246188	149.5477126
M11777	5B	683352064	0.010149067	0.134020619	99	0.029485141	0.103037388	0.098214635	58.92878104
M11253	5B	624609798	0.010197482	0.06185567	99	0.029485141	0.102939558	0.114697865	68.81871875
M12499	6A	127787324	0.010302508	0.216494845	99	0.029485141	0.10272899	0.068219243	40.9315458
M10622	5B	4826033	0.010364307	0.134020619	99	0.029485141	0.102606135	0.087235797	52.34147818
M3570	2B	31382129	0.010487872	0.24742268	99	0.029485141	0.102362771	0.07170096	43.02057626
M3634	2B	31910530	0.010529222	0.474226804	99	0.029485141	0.102282	0.058183063	34.9098381
M3623	2B	24266934	0.010799778	0.381443299	99	0.029485141	0.101761555	0.120561503	-72.3369017
M11096	5B	593066036	0.010812334	0.463917526	99	0.029485141	0.101737735	0.099464623	59.6787741
M3235	2A	0	0.010844292	0.134020619	99	0.029485141	0.101677236	0.093572955	-56.14377308
M1355	1B	7319459	0.011002379	0.402061856	99	0.029485141	0.101380679	0.099746288	-59.84777288
M3988	2B	159210768	0.011092627	0.072164948	99	0.029485141	0.101213375	0.099320468	59.59228104
M4718	2B	717090293	0.01129016	0.103092784	99	0.029485141	0.100852096	0.092572954	55.54377246
M8410	3D	380816249	0.011305513	0.06185567	99	0.029485141	0.100824294	0.107571031	64.54261857
M13909	6D	10760221	0.011322691	0.309278351	99	0.029485141	0.100793232	0.078925068	-47.35504103
M11216	5B	495473264	0.011343715	0.432989691	99	0.029485141	0.100755284	0.083277497	49.96649834
M12080	6A	4290482	0.011358504	0.268041237	99	0.029485141	0.100728636	0.070652149	-42.39128944
M259	1A	387811947	0.011416073	0.319587629	99	0.029485141	0.10062524	0.238165782	142.8994695
M9823	5A	1243651	0.011493728	0.494845361	99	0.029485141	0.100486633	0.065479872	39.28792319
M9427	4A	733792535	0.011614463	0.432989691	99	0.029485141	0.100273064	0.063507187	38.10431209
M12954	6A	611314636	0.011699496	0.391752577	99	0.029485141	0.100124039	0.110019617	66.01177011
M9801	4D	675631336	0.011703978	0.494845361	99	0.029485141	0.100116215	0.075857086	-45.51425169
M997	1B	41982366	0.011870907	0.237113402	99	0.029485141	0.099827045	0.081921849	-49.15310932
M3661	2B	56189523	0.011910411	0.360824742	99	0.029485141	0.099759237	0.068578374	-41.14702438
M419	1A	235956432	0.011940484	0.391752577	99	0.029485141	0.099707773	0.064478179	38.68690744
M15534	7B	633224854	0.012125034	0.144329897	99	0.029485141	0.099394897	0.098167233	-58.90033985
M993	1B	658570786	0.012140218	0.381443299	99	0.029485141	0.099369376	0.137802584	-82.68155045
M9812	4D	502639106	0.012157665	0.484536082	99	0.029485141	0.099340094	0.074288702	-44.57322134
M5895	2D	608405941	0.012187767	0.402061856	99	0.029485141	0.099289676	0.106829375	64.09762492
M1374	1B	291083356	0.012208614	0.381443299	99	0.029485141	0.099254835	0.075127693	-45.07661603
M13897	6D	7716534	0.012224651	0.319587629	99	0.029485141	0.099228075	0.064728732	-38.83723921
M14791	7A	618115880	0.012496305	0.298969072	99	0.029485141	0.098780294	0.076012936	45.60776155
M9357	4A	729926047	0.012588454	0.391752577	99	0.029485141	0.098630712	0.07249666	-43.49799616
M9069	4A	687808511	0.012716063	0.257731959	99	0.029485141	0.098425451	0.062521894	37.51313613
M9135	4A	432988616	0.012852843	0.422680412	99	0.029485141	0.098207821	0.095902142	-57.54128532
M1445	1B	406770303	0.012877159	0.350515464	99	0.029485141	0.098169386	0.130146431	-78.08785859
M10683	5B	0	0.012961584	0.06185567	99	0.029485141	0.098036526	0.102373084	-61.42385039
M3629	2B	47668010	0.01296301	0.453608247	99	0.029485141	0.098034291	0.056493482	33.89608934
M14802	7A	577687730	0.013016913	0.288659794	99	0.029485141	0.097949948	0.094647927	-56.78875634
M425	1A	507936918	0.013036737	0.237113402	99	0.029485141	0.097919019	0.077231621	46.33897281
M14089	6D	460856196	0.013188672	0.030927835	99	0.029485141	0.097683612	0.140268073	84.16084389
M4936	2B	752843256	0.013340754	0.463917526	99	0.029485141	0.097450805	0.058809475	-35.28568473
M9339	4A	0	0.013342512	0.484536082	99	0.029485141	0.097448131	0.075023461	-45.01407651
M1072	1B	21849576	0.013477428	0.113402062	99	0.029485141	0.097243946	0.078266973	46.96018403
M1236	1B	86102631	0.013507604	0.041237113	99	0.029485141	0.09719857	0.136406591	81.84395466
M1062	1B	168149961	0.013507604	0.041237113	99	0.029485141	0.09719857	0.136406591	-81.84395466
M977	1B	714373153	0.01355251	0.268041237	99	0.029485141	0.097131241	0.087674562	52.60473698
M7591	3B	379343215	0.013567356	0.381443299	99	0.029485141	0.097109032	0.113613789	-68.16827331
M14769	7A	540857216	0.013611909	0.391752577	99	0.029485141	0.097042539	0.053120874	-31.8725243
M1449	1B	45280100	0.013688235	0.195876289	99	0.029485141	0.096929156	0.075571163	45.34269776
M14761	7A	611894565	0.013766926	0.237113402	99	0.029485141	0.096812951	0.073666448	-44.19986892
M14774	7A	617608282	0.013771069	0.422680412	99	0.029485141	0.096806852	0.073062112	43.83726705
M1040	1B	186525506	0.013864916	0.412371134	99	0.029485141	0.096669216	0.107537649	-64.52258954
M983	1B	8925568	0.013966536	0.103092784	99	0.029485141	0.096521276	0.088933033	-53.35981967
M7895	3B	211212780	0.014027599	0.298969072	99	0.029485141	0.096432922	0.057670579	-34.60234763
M1216	1B	29514277	0.014054454	0.412371134	99	0.029485141	0.096394192	0.062015963	-37.2095777
M5733	2D	584768696	0.014310786	0.288659794	99	0.029485141	0.096028374	0.070640575	42.38434507
M10156	5A	268836139	0.014398709	0.381443299	99	0.029485141	0.095904478	0.057016664	-34.20999833
M575	1A	45100852	0.014405285	0.298969072	99	0.029485141	0.095895242	0.085687561	51.41253656
M4468	2B	636117660	0.014420393	0.278350515	99	0.029485141	0.095874043	0.058179186	34.90751157
M15428	7B	539790379	0.014512476	0.030927835	99	0.029485141	0.095745336	0.151342336	-90.80540135
M15452	7B	583551258	0.014697201	0.329896907	99	0.029485141	0.095489702	0.056816023	-34.0896139
M965	1B	50203925	0.014701701	0.402061856	99	0.029485141	0.095483516	0.109460312	-65.67618742
M7494	3B	332877259	0.014703672	0.329896907	99	0.029485141	0.095480808	0.071764505	-43.05870299
M14502	7A	62750954	0.01471012	0.340206186	99	0.029485141	0.095471949	0.108593385	-65.15603071
M13506	6B	643559602	0.014849273	0.041237113	99	0.029485141	0.095281772	0.121132967	-72.67978041
M1009	1B	39514123	0.015075135	0.020618557	99	0.029485141	0.094977037	0.197044287	118.2265722
M1224	1B	0	0.015075135	0.020618557	99	0.029485141	0.094977037	0.197044287	118.2265722
M6361	3A	357806111	0.015118921	0.298969072	99	0.029485141	0.094918515	0.07545054	-45.27032391
M1067	1B	174663837	0.015126516	0.113402062	99	0.029485141	0.094908382	0.080046148	48.02768872
M4080	2B	138508909	0.015312805	0.226804124	99	0.029485141	0.094661501	0.060368138	-36.22088253
M13908	6D	10760515	0.015523581	0.381443299	99	0.029485141	0.094385943	0.055140775	-33.08446507
M5776	2D	590146863	0.015636963	0.206185567	99	0.029485141	0.094239333	0.068892037	-41.33522198
M6837	3A	374475866	0.01571798	0.113402062	99	0.029485141	0.094135254	0.076351042	45.81062522
M1389	1B	0	0.015721979	0.412371134	99	0.029485141	0.094130133	0.07389782	44.33869199
M5765	2D	266394528	0.015773365	0.484536082	99	0.029485141	0.094064428	0.074330313	-44.5981881
M4370	2B	0	0.015795652	0.319587629	99	0.029485141	0.094036001	0.060990091	36.59405484
M9008	4A	666991274	0.015916335	0.092783505	99	0.029485141	0.093882798	0.091713061	55.02783682
M4974	2B	46505672	0.015944906	0.144329897	99	0.029485141	0.093846708	0.069762295	-41.85737672
M10089	5A	461901240	0.015954504	0.237113402	99	0.029485141	0.093834599	0.069220463	41.53227797
M1671	1B	628033554	0.016020086	0.350515464	99	0.029485141	0.093752062	0.191953642	-115.1721852
M15104	7A	731424299	0.016025177	0.463917526	99	0.029485141	0.093745671	0.093154323	55.89259362
M7606	3B	562403156	0.016044413	0.06185567	99	0.029485141	0.093721538	0.098723848	-59.23430897
M9754	4D	80836783	0.016186503	0.402061856	99	0.029485141	0.093544209	0.122322533	73.39352004
M3764	2B	91596926	0.016272402	0.329896907	99	0.029485141	0.093437797	0.177654263	106.5925576
M9764	4D	370674103	0.016316209	0.268041237	99	0.029485141	0.093383756	0.058305768	-34.98346087
M3331	2A	0	0.016344357	0.18556701	99	0.029485141	0.093349112	0.065470721	39.28243236
M8364	3D	436621773	0.016498636	0.453608247	99	0.029485141	0.09316034	0.076165542	45.69932516
M3207	2A	758079104	0.016542789	0.360824742	99	0.029485141	0.093106655	0.058267624	34.96057437
M277	1A	376476439	0.016719152	0.041237113	99	0.029485141	0.092893715	0.119747155	71.84829275
M1577	1B	420600926	0.016781355	0.257731959	99	0.029485141	0.092819174	0.065779115	39.46746901
M1037	1B	92259228	0.016807388	0.329896907	99	0.029485141	0.092788063	0.100530265	-60.31815891
M9712	4B	667427561	0.016821614	0.381443299	99	0.029485141	0.092771084	0.071587212	-42.95232748
M9763	4D	370674103	0.016851792	0.360824742	99	0.029485141	0.092735115	0.069108212	41.46492711
M1451	1B	45280118	0.017018471	0.257731959	99	0.029485141	0.092537665	0.067957964	40.77477857
M15545	7B	641684991	0.017284407	0.474226804	99	0.029485141	0.092226803	0.09110242	54.66145218
M1264	1B	418051065	0.01734206	0.092783505	99	0.029485141	0.092160074	0.085385062	51.23103739
M13026	6B	19336874	0.017386368	0.113402062	99	0.029485141	0.092108949	0.082266018	-49.35961099
M4953	2B	762073843	0.017406426	0.144329897	99	0.029485141	0.092085851	0.070772927	-42.46375597
M9739	4D	663571979	0.017581251	0.103092784	99	0.029485141	0.091885698	0.081923086	-49.15385159
M13521	6B	634042491	0.0175975	0.494845361	99	0.029485141	0.091867201	0.090307272	54.18436308
M14604	7A	96563541	0.017630477	0.195876289	99	0.029485141	0.091829718	0.074855954	-44.91357235
M9713	4B	660420109	0.017757766	0.391752577	99	0.029485141	0.091685723	0.064948707	38.96922395
M9335	4A	0	0.017781848	0.237113402	99	0.029485141	0.091658602	0.059713836	35.82830143
M7286	3B	0	0.017953093	0.298969072	99	0.029485141	0.091466857	0.075698636	45.41918181
M15438	7B	567730502	0.017965283	0.360824742	99	0.029485141	0.091453282	0.137741308	82.6447845
M14681	7A	138247000	0.017984352	0.412371134	99	0.029485141	0.091432065	0.068461287	-41.07677215
M3191	2A	72169399	0.018005163	0.051546392	99	0.029485141	0.091408936	0.106391068	63.83464083
M2768	2A	125458503	0.018017705	0.237113402	99	0.029485141	0.091395011	0.074838081	-44.90284859
M15521	7B	400828319	0.018076533	0.164948454	99	0.029485141	0.09132983	0.06611483	39.66889785
M14396	7A	28554017	0.018077371	0.443298969	99	0.029485141	0.091328904	0.061602265	36.96135919
M3789	2B	16256106	0.018092245	0.412371134	99	0.029485141	0.091312459	0.092660871	55.59652263
M13602	6B	79255016	0.018135528	0.113402062	99	0.029485141	0.091264689	0.076355136	45.81308153
M8355	3D	45029418	0.018212832	0.206185567	99	0.029485141	0.091179667	0.076117909	45.67074537
M10022	5A	0	0.018356538	0.24742268	99	0.029485141	0.09102262	0.067141694	40.28501616
M9184	4A	707676969	0.018378237	0.474226804	99	0.029485141	0.090999019	0.084143584	-50.48615037
M14749	7A	626447683	0.018398392	0.443298969	99	0.029485141	0.090977123	0.061830536	37.09832141
M3383	2A	585501135	0.018565843	0.350515464	99	0.029485141	0.090796182	0.087011804	-52.20708219
M7773	3B	727794861	0.018696058	0.391752577	99	0.029485141	0.09065666	0.090172309	54.1033854
M9349	4A	738890239	0.018713664	0.422680412	99	0.029485141	0.090637874	0.069420744	41.65244631
M14017	6D	9514548	0.018941315	0.474226804	99	0.029485141	0.090396629	0.089144848	-53.48690885
M853	1B	11179602	0.019045473	0.371134021	99	0.029485141	0.090287267	0.129684474	77.8106845
M9770	4D	417815115	0.019080696	0.412371134	99	0.029485141	0.090250426	0.076131034	45.67862069
M6456	3A	569891580	0.019261333	0.195876289	99	0.029485141	0.090062613	0.075466203	-45.27972205
M3013	2A	706928677	0.019271458	0.24742268	99	0.029485141	0.09005214	0.05933108	-35.5986482
M8915	4A	330012453	0.019353503	0.041237113	99	0.029485141	0.089967495	0.118938496	71.36309766
M8366	3D	436621773	0.01935413	0.391752577	99	0.029485141	0.08996685	0.072487846	43.49270773
M9834	5A	407251142	0.019412393	0.319587629	99	0.029485141	0.089906971	0.062498326	-37.49899558
M7364	3B	74176759	0.019491577	0.06185567	99	0.029485141	0.089825893	0.110924501	-66.55470065
M11422	5B	440938538	0.019493459	0.134020619	99	0.029485141	0.089823971	0.07610277	45.66166172
M5955	2D	647308726	0.019515957	0.278350515	99	0.029485141	0.089801	0.08179928	49.07956797
M5258	2B	765373126	0.019569403	0.175257732	99	0.029485141	0.089746544	0.065968163	39.58089781
M6873	3A	739791338	0.019603187	0.412371134	99	0.029485141	0.089712202	0.090138049	-54.08282965
M8532	4A	24767404	0.019657128	0.412371134	99	0.029485141	0.089657498	0.068464787	41.07887249
M10064	5A	469896498	0.019685453	0.24742268	99	0.029485141	0.089628837	0.055254809	-33.1528855
M2027	1D	18619415	0.019774079	0.484536082	99	0.029485141	0.089539437	0.055186024	-33.11161467
M9798	4D	484271501	0.019792943	0.319587629	99	0.029485141	0.089520462	0.072132485	-43.27949084
M3643	2B	50713994	0.020016668	0.340206186	99	0.029485141	0.089296872	0.054271135	32.56268091
M9735	4D	681466316	0.020026209	0.432989691	99	0.029485141	0.089287395	0.085271803	-51.16308206
M14667	7A	126871451	0.020077551	0.371134021	99	0.029485141	0.089236481	0.065568592	39.34115513
M14963	7A	477189698	0.02016124	0.18556701	99	0.029485141	0.089153783	0.065783029	-39.4698173
M13007	6B	11974839	0.020178518	0.072164948	99	0.029485141	0.089136754	0.094670506	-56.80230352
M14777	7A	597566121	0.020485868	0.237113402	99	0.029485141	0.088836385	0.063981031	38.3886187
M8447	3D	537339977	0.020536846	0.402061856	99	0.029485141	0.088787025	0.052653118	31.59187066
M33	1A	3982825	0.020610236	0.360824742	99	0.029485141	0.08871619	0.092266211	-55.35972688
M11244	5B	526607377	0.02067031	0.422680412	99	0.029485141	0.088658405	0.08184824	-49.10894411
M2175	1D	0	0.020751094	0.298969072	99	0.029485141	0.088580977	0.069767928	41.86075686
M5815	2D	605908690	0.02078493	0.360824742	99	0.029485141	0.088548641	0.065930536	39.55832146
M4441	2B	640489568	0.020798758	0.092783505	99	0.029485141	0.088535442	0.087247312	-52.34838735
M6447	3A	523316233	0.021076357	0.319587629	99	0.029485141	0.088272412	0.056798002	34.07880127
M15157	7B	641779	0.021123736	0.226804124	99	0.029485141	0.088227885	0.06054713	-36.32827813
M9974	5A	65359644	0.021237183	0.164948454	99	0.029485141	0.088121692	0.068811718	41.28703072
M5120	2B	37969341	0.021315473	0.195876289	99	0.029485141	0.088048757	0.060448932	36.26935891
M38	1A	2276875	0.021418944	0.350515464	99	0.029485141	0.087952796	0.071155528	42.69331694
M12969	6B	1773156	0.021485432	0.484536082	99	0.029485141	0.087891391	0.061837848	-37.10270877
M10027	5A	438408501	0.021508315	0.329896907	99	0.029485141	0.087870304	0.064377529	-38.62651745
M8272	3D	0	0.021536242	0.340206186	99	0.029485141	0.0878446	0.061505729	36.90343764
M14635	7A	130233823	0.021548283	0.360824742	99	0.029485141	0.087833529	0.063653054	38.19183269
M4955	2B	762916610	0.02157616	0.381443299	99	0.029485141	0.087807922	0.121323441	-72.79406456
M12841	6A	112239421	0.021690041	0.24742268	99	0.029485141	0.087703674	0.089391834	-53.63510064
M12988	6B	0	0.02175742	0.103092784	99	0.029485141	0.087642267	0.080354793	-48.21287599
M9934	5A	139519642	0.021874363	0.329896907	99	0.029485141	0.087536163	0.070843635	42.50618076
M4253	2B	237159653	0.021902322	0.360824742	99	0.029485141	0.087510883	0.067040472	40.22428333
M1016	1B	50019841	0.021907473	0.494845361	99	0.029485141	0.08750623	0.069313418	41.58805097
M15398	7B	522729143	0.021989	0.432989691	99	0.029485141	0.08743273	0.06994511	41.96706584
M1420	1B	221737181	0.022034074	0.412371134	99	0.029485141	0.087392217	0.08182883	-49.09729814
M3284	2A	799384357	0.022121709	0.443298969	99	0.029485141	0.087313699	0.058286599	34.97195935
M9652	4B	662396344	0.022124134	0.402061856	99	0.029485141	0.087311532	0.057122244	34.27334627
M5073	2B	769895997	0.022189064	0.340206186	99	0.029485141	0.087253575	0.05354487	-32.12692203
M11379	5B	719383797	0.022235242	0.381443299	99	0.029485141	0.087212466	0.069613765	41.76825928
M11513	5B	559992958	0.022532607	0.195876289	99	0.029485141	0.086949878	0.074205165	44.52309886
M670	1A	583895706	0.022618328	0.350515464	99	0.029485141	0.086874861	0.052694248	31.61654883
M1547	1B	0	0.022645994	0.340206186	99	0.029485141	0.086850714	0.099797592	-59.87855512
M5588	2D	29408508	0.022646064	0.288659794	99	0.029485141	0.086850654	0.064886327	-38.9317964
M3631	2B	286756395	0.02281375	0.298969072	99	0.029485141	0.086704958	0.10524382	63.14629208
M13747	6B	711703518	0.022930229	0.216494845	99	0.029485141	0.086604419	0.061150066	-36.69003977
M10157	5A	601178570	0.023021643	0.288659794	99	0.029485141	0.086525891	0.055183113	-33.10986791
M8988	4A	635530051	0.023084093	0.309278351	99	0.029485141	0.086472435	0.05634909	33.80945421
M402	1A	939984	0.023089121	0.484536082	99	0.029485141	0.086468137	0.063891091	-38.33465464
M8772	4A	5065562	0.023096014	0.072164948	99	0.029485141	0.086462247	0.088462524	53.07751453
M6130	3A	22234939	0.023131706	0.474226804	99	0.029485141	0.08643178	0.078499207	-47.09952421
M9543	4B	552833548	0.023202754	0.432989691	99	0.029485141	0.08637128	0.080964649	-48.57878959
M9470	4B	26933807	0.023350295	0.340206186	99	0.029485141	0.086246265	0.04969322	29.81593214
M235	1A	341122401	0.023361293	0.082474227	99	0.029485141	0.086236979	0.088498253	53.09895166
M7720	3B	284044674	0.023551039	0.134020619	99	0.029485141	0.086077504	0.070486333	-42.29180007
M12983	6B	0	0.023698779	0.432989691	99	0.029485141	0.08595427	0.078285675	-46.97140473
M15331	7B	0	0.023850439	0.474226804	99	0.029485141	0.085828607	0.086004509	-51.60270549
M6867	3A	0	0.023937361	0.072164948	99	0.029485141	0.085756966	0.08829989	-52.97993389
M1565	1B	592833254	0.02394921	0.474226804	99	0.029485141	0.085747221	0.047735813	28.6414877
M461	1A	536664269	0.024028329	0.494845361	99	0.029485141	0.085682283	0.075728898	45.43733871
M13455	6B	692920469	0.024033202	0.278350515	99	0.029485141	0.085678291	0.056479338	33.88760299
M6808	3A	732737562	0.024171344	0.195876289	99	0.029485141	0.085565473	0.058141711	-34.88502652
M7763	3B	537558624	0.02425005	0.432989691	99	0.029485141	0.085501499	0.067040571	-40.22434276
M4195	2B	151482156	0.024286554	0.18556701	99	0.029485141	0.085471902	0.064457655	-38.67459328
M9563	4B	526967219	0.024294356	0.18556701	99	0.029485141	0.085465583	0.071668075	43.00084495
M4257	2B	437956650	0.024396261	0.453608247	99	0.029485141	0.085383238	0.052025895	31.21553682
M4568	2B	545270114	0.024532722	0.226804124	99	0.029485141	0.085273536	0.053485277	-32.09116607
M14599	7A	108215582	0.02455543	0.391752577	99	0.029485141	0.085255343	0.064665973	38.79958372
M15037	7A	720347008	0.024572207	0.463917526	99	0.029485141	0.085241914	0.065482347	39.28940849
M1758	1B	0	0.024681001	0.360824742	99	0.029485141	0.085155062	0.074683521	-44.81011263
M3237	2A	760509250	0.024812043	0.412371134	99	0.029485141	0.085050986	0.074091095	44.45465677
M629	1A	481552064	0.024877026	0.298969072	99	0.029485141	0.08499959	0.053197775	31.91866517
M4010	2B	131147922	0.024882597	0.350515464	99	0.029485141	0.084995191	0.051549741	30.92984443
M12299	6A	23850958	0.024902094	0.030927835	99	0.029485141	0.084979802	0.128475797	-77.085478
M10084	5A	0	0.025016008	0.494845361	99	0.029485141	0.084890143	0.062964737	-37.77884195
M6143	3A	20335431	0.025028035	0.18556701	99	0.029485141	0.084880703	0.06941938	41.65162786
M12890	6A	467313559	0.025110907	0.298969072	99	0.029485141	0.08481578	0.06493048	-38.95828778
M1258	1B	390280239	0.025245059	0.257731959	99	0.029485141	0.084711163	0.053421467	-32.05288042
M13511	6B	96547784	0.025299747	0.381443299	99	0.029485141	0.084668685	0.108152278	64.89136674
M10502	5A	0	0.025429713	0.24742268	99	0.029485141	0.084568121	0.058487681	-35.09260889
M6246	3A	251028863	0.025519031	0.422680412	99	0.029485141	0.084499325	0.065386306	-39.23178372
M11024	5B	494739791	0.025534754	0.18556701	99	0.029485141	0.08448724	0.071046251	-42.62775034
M9832	5A	6609542	0.025685468	0.402061856	99	0.029485141	0.084371805	0.056431004	-33.8586027
M1356	1B	7319459	0.02581253	0.216494845	99	0.029485141	0.08427504	0.075112702	45.06762092
M8547	4A	381110396	0.025852753	0.350515464	99	0.029485141	0.084244514	0.052972621	31.78357268
M5714	2D	610403424	0.025865946	0.195876289	99	0.029485141	0.084234512	0.064718871	38.83132254
M11033	5B	514824088	0.026096921	0.329896907	99	0.029485141	0.084060276	0.058416588	-35.04995265
M12974	6B	2460592	0.026165358	0.443298969	99	0.029485141	0.084008964	0.072918565	-43.75113912
M15376	7B	518835133	0.026278964	0.402061856	99	0.029485141	0.083924099	0.067644083	40.58644985
M6263	3A	387080506	0.026385969	0.278350515	99	0.029485141	0.083844518	0.065170976	39.10258558
M10008	5A	393257332	0.026451139	0.268041237	99	0.029485141	0.083796218	0.06939011	-41.63406626
M14517	7A	56431349	0.026493548	0.154639175	99	0.029485141	0.083764855	0.060356479	-36.21388736
M15586	7B	0	0.026640166	0.072164948	99	0.029485141	0.083656832	0.098976776	-59.38606534
M8756	4A	46952980	0.026660885	0.350515464	99	0.029485141	0.083641618	0.06283511	37.70106593
M14735	7A	66595158	0.026703886	0.340206186	99	0.029485141	0.083610081	0.051311243	30.78674593
M11054	5B	433701292	0.026739915	0.24742268	99	0.029485141	0.0835837	0.059343279	-35.60596725
M15208	7B	40953419	0.026818788	0.340206186	99	0.029485141	0.083526077	0.128145861	-76.88751645
M14028	6D	376894633	0.026829748	0.484536082	99	0.029485141	0.083518085	0.064884663	38.93079807
M776	1B	608789376	0.026859892	0.164948454	99	0.029485141	0.083496119	0.072496807	43.4980844
M9334	4A	720048127	0.026890154	0.412371134	99	0.029485141	0.083474094	0.066901091	40.14065449
M3696	2B	69066012	0.026919722	0.103092784	99	0.029485141	0.083452599	0.084122224	-50.47333448
M5000	2B	0	0.026939273	0.463917526	99	0.029485141	0.0834384	0.063627618	-38.17657069
M2764	2A	489635273	0.02694075	0.371134021	99	0.029485141	0.083437328	0.066992229	40.19533732
M13402	6B	159380420	0.027046921	0.432989691	99	0.029485141	0.083360414	0.081374533	-48.82471991
M1620	1B	603262258	0.027114088	0.226804124	99	0.029485141	0.083311922	0.059244317	-35.54659047
M6734	3A	720487778	0.027164336	0.164948454	99	0.029485141	0.083275727	0.06223264	37.33958418
M15120	7A	748805327	0.027334737	0.134020619	99	0.029485141	0.08315351	0.066855511	-40.11330664
M11814	5B	548989698	0.027364379	0.453608247	99	0.029485141	0.083132332	0.087296237	-52.37774242
M11869	5B	612532049	0.027389061	0.154639175	99	0.029485141	0.083114716	0.06550718	39.30430815
M3610	2B	46601701	0.027413205	0.329896907	99	0.029485141	0.083097502	0.055639255	33.38355323
M13638	6B	315039276	0.027652825	0.432989691	99	0.029485141	0.082927511	0.087010362	52.20621701
M10369	5A	568264305	0.027672968	0.432989691	99	0.029485141	0.082913293	0.064474115	38.68446917
M4172	2B	223152424	0.027746456	0.072164948	99	0.029485141	0.082861513	0.085954478	-51.57268677
M436	1A	520868188	0.027756691	0.257731959	99	0.029485141	0.082854312	0.07100132	42.60079219
M11782	5B	684446901	0.027835913	0.134020619	99	0.029485141	0.082798675	0.067352632	-40.4115793
M5090	2B	770053999	0.027979068	0.278350515	99	0.029485141	0.082698563	0.062257	-37.3541998
M14661	7A	134621823	0.02807692	0.298969072	99	0.029485141	0.082630444	0.099614491	59.76869446
M14669	7A	148468027	0.028104554	0.494845361	99	0.029485141	0.082611252	0.069006404	41.40384221
M10079	5A	467370058	0.028274844	0.216494845	99	0.029485141	0.082493427	0.062474157	37.48449429
M1387	1B	458703195	0.02827497	0.412371134	99	0.029485141	0.08249334	0.063198419	-37.91905144
M11639	5B	598117781	0.028335211	0.381443299	99	0.029485141	0.082451839	0.069763166	-41.85789988
M267	1A	339927631	0.028374961	0.319587629	99	0.029485141	0.082424505	0.128854521	77.31271289
M2252	1D	469542770	0.028519541	0.329896907	99	0.029485141	0.082325429	0.064963513	38.97810777
M12497	6A	421534410	0.028576878	0.371134021	99	0.029485141	0.082286285	0.061742519	-37.04551143
M4972	2B	623392065	0.028615707	0.453608247	99	0.029485141	0.082259823	0.051372443	-30.82346601
M13314	6B	452530948	0.028670501	0.443298969	99	0.029485141	0.082222547	0.056029805	33.61788324
M15247	7B	70880591	0.028692146	0.432989691	99	0.029485141	0.082207842	0.076058613	-45.63516774
M14805	7A	634800683	0.028709048	0.350515464	99	0.029485141	0.082196368	0.057332069	-34.39924111
M4123	2B	581433203	0.028730399	0.12371134	99	0.029485141	0.082181884	0.068868629	41.32117718
M2933	2A	138659939	0.028735448	0.319587629	99	0.029485141	0.08217846	0.125546387	-75.32783194
M15240	7B	57681594	0.028978575	0.463917526	99	0.029485141	0.082014359	0.065272705	-39.16362301
M13498	6B	449677848	0.029001247	0.195876289	99	0.029485141	0.081999131	0.062850029	-37.71001732
M4523	2B	635172360	0.029225545	0.463917526	99	0.029485141	0.081849152	0.058280095	34.96805712
M10280	5A	550095459	0.029313811	0.381443299	99	0.029485141	0.081790467	0.061370482	36.82228903
M5586	2D	459879715	0.029321683	0.484536082	99	0.029485141	0.081785242	0.051758744	31.0552464
M1055	1B	3440095	0.02934776	0.474226804	99	0.029485141	0.081767945	0.074715461	44.82927673
M7573	3B	364670841	0.02937948	0.391752577	99	0.029485141	0.081746926	0.092127356	-55.27641342
M1	1A	6341226	0.029453733	0.164948454	99	0.029485141	0.081697819	0.073235032	43.94101947
M4388	2B	545940419	0.029462936	0.340206186	99	0.029485141	0.081691742	0.053003489	-31.80209354
M5276	2B	792988297	0.029505661	0.164948454	99	0.029485141	0.081663555	0.067177507	-40.30650413
M4651	2B	630100686	0.029608979	0.340206186	99	0.029485141	0.081595571	0.059502329	35.70139733
M11135	5B	511056182	0.029630519	0.298969072	99	0.029485141	0.081581429	0.050533066	-30.31983935
M10083	5A	0	0.029637949	0.350515464	99	0.029485141	0.081576554	0.053795653	32.27739151
M9018	4A	0	0.029672904	0.082474227	99	0.029485141	0.081553634	0.086454911	51.87294643
M11674	5B	631373208	0.029818963	0.226804124	99	0.029485141	0.081458172	0.059738054	-35.84283222
M10038	5A	445275979	0.029923779	0.113402062	99	0.029485141	0.081389971	0.111983343	67.19000565
M10118	5A	742010724	0.029923779	0.113402062	99	0.029485141	0.081389971	0.111983343	-67.19000565
M655	1A	583529682	0.029926276	0.329896907	99	0.029485141	0.081388349	0.050965926	-30.57955574
M9916	5A	42684379	0.029963884	0.237113402	99	0.029485141	0.081363943	0.053879946	-32.32796783
M1375	1B	406036659	0.030096097	0.432989691	99	0.029485141	0.081278398	0.071089808	42.65388461
M15519	7B	611412290	0.030173135	0.164948454	99	0.029485141	0.081228736	0.061391417	36.83484993
M5138	2B	780857763	0.030236561	0.154639175	99	0.029485141	0.081187951	0.061785757	37.07145391
M5766	2D	266394528	0.030315303	0.402061856	99	0.029485141	0.081137442	0.049700314	-29.82018824
M6370	3A	482936809	0.030331305	0.381443299	99	0.029485141	0.081127194	0.059983083	35.98984958
M4190	2B	704873966	0.030369611	0.463917526	99	0.029485141	0.081102687	0.0633134	-37.98804002
M9859	5A	0	0.030384085	0.391752577	99	0.029485141	0.081093435	0.057740361	-34.64421662
M9972	5A	63268470	0.030525326	0.154639175	99	0.029485141	0.081003401	0.068942391	-41.36543447
M11681	5B	617590427	0.03065854	0.463917526	99	0.029485141	0.080918888	0.073217101	-43.93026089
M13730	6B	708271328	0.030688243	0.319587629	99	0.029485141	0.080900097	0.06276989	37.66193384
M9811	4D	502639106	0.030688468	0.195876289	99	0.029485141	0.080899955	0.063750631	-38.25037873
M1485	1B	556105423	0.0306984	0.298969072	99	0.029485141	0.080893676	0.05875094	-35.25056412
M924	1B	385657223	0.030931841	0.257731959	99	0.029485141	0.080746716	0.064787606	-38.87256333
M9714	4B	660420109	0.031003498	0.288659794	99	0.029485141	0.080701841	0.06167157	37.00294185
M415	1A	515899450	0.031024436	0.412371134	99	0.029485141	0.080688749	0.063397439	38.03846317
M9076	4A	643624450	0.031029302	0.06185567	99	0.029485141	0.080685708	0.0928282	-55.69691973
M6883	3B	35796740	0.031047699	0.237113402	99	0.029485141	0.080674215	0.058956638	-35.37398261
M13086	6B	616736253	0.03108325	0.24742268	99	0.029485141	0.080652026	0.051293863	30.77631764
M15364	7B	158543054	0.031273729	0.402061856	99	0.029485141	0.080533595	0.09022956	-54.13773617
M7413	3B	510300393	0.031323302	0.24742268	99	0.029485141	0.080502899	0.056915488	34.14929296
M6319	3A	434822187	0.031392935	0.216494845	99	0.029485141	0.080459868	0.058987217	35.39233004
M5975	2D	0	0.031422024	0.072164948	99	0.029485141	0.080441922	0.101533503	60.92010183
M5993	2D	766158473	0.031422024	0.072164948	99	0.029485141	0.080441922	0.101533503	-60.92010183
M1990	1D	2053505	0.031434928	0.340206186	99	0.029485141	0.080433967	0.056420329	-33.85219724
M840	1B	605159237	0.031523977	0.206185567	99	0.029485141	0.080379163	0.064190221	-38.51413236
M3376	2A	646604085	0.031644863	0.319587629	99	0.029485141	0.080305028	0.069518264	41.71095839
M462	1A	536664269	0.031810119	0.463917526	99	0.029485141	0.080204167	0.065710265	-39.42615897
M5346	2B	641608096	0.031824934	0.402061856	99	0.029485141	0.080195153	0.10636939	-63.8216339
M11339	5B	527931318	0.031826067	0.350515464	99	0.029485141	0.080194464	0.118980257	71.38815394
M2471	2A	19484111	0.031952687	0.371134021	99	0.029485141	0.080117601	0.064292132	38.57527911
M10511	5A	679723058	0.032109696	0.371134021	99	0.029485141	0.080022739	0.090011794	54.0070764
M11739	5B	676094493	0.032121648	0.030927835	99	0.029485141	0.080015538	0.126008904	75.60534261
M13952	6D	25851482	0.032187747	0.237113402	99	0.029485141	0.079975766	0.062782039	37.6692236
M9313	4A	730004142	0.032204715	0.18556701	99	0.029485141	0.07996557	0.062675647	37.60538808
M9338	4A	728781198	0.032221155	0.391752577	99	0.029485141	0.079955697	0.064624443	38.77466602
M11824	5B	700774990	0.032268523	0.268041237	99	0.029485141	0.079927279	0.056999282	-34.19956932
M14258	7A	0	0.032280657	0.432989691	99	0.029485141	0.079920007	0.075498429	-45.2990574
M5994	2D	766158473	0.032429524	0.402061856	99	0.029485141	0.079831022	0.100804933	-60.48296005
M6007	2D	642133932	0.032429524	0.402061856	99	0.029485141	0.079831022	0.100804933	-60.48296005
M12320	6A	141521478	0.032487048	0.350515464	99	0.029485141	0.079796753	0.11276516	67.65909614
M9787	4D	465587647	0.032552383	0.340206186	99	0.029485141	0.079757908	0.059815492	-35.8892951
M13697	6B	713822686	0.032636712	0.226804124	99	0.029485141	0.079707894	0.061210835	36.72650112
M11818	5B	691998063	0.032656366	0.298969072	99	0.029485141	0.079696258	0.056150008	-33.69000494
M1689	1B	612865939	0.032721804	0.453608247	99	0.029485141	0.079657567	0.057524561	34.51473679
M10037	5A	445275979	0.032792017	0.494845361	99	0.029485141	0.079616144	0.0760645	45.63870006
M11504	5B	142781109	0.032809978	0.494845361	99	0.029485141	0.079605563	0.047457333	28.47440002
M9795	4D	481893268	0.032858788	0.12371134	99	0.029485141	0.079576839	0.070729903	-42.43794167
M5627	2D	593032041	0.032867431	0.371134021	99	0.029485141	0.079571757	0.114712445	-68.82746723
M5949	2D	774840471	0.032904248	0.092783505	99	0.029485141	0.079550127	0.082202168	-49.32130091
M1368	1B	392431722	0.032929045	0.041237113	99	0.029485141	0.079535574	0.108478435	-65.08706108
M15340	7B	254066318	0.032930547	0.051546392	99	0.029485141	0.079534692	0.116495517	69.89730998
M14125	6D	470323614	0.033017788	0.443298969	99	0.029485141	0.079483585	0.053811461	32.28687651
M410	1A	501031648	0.033066805	0.082474227	99	0.029485141	0.079454932	0.076307237	45.78434195
M1045	1B	94011977	0.033067744	0.329896907	99	0.029485141	0.079454383	0.063440673	-38.06440387
M6781	3A	719820906	0.033074912	0.329896907	99	0.029485141	0.079450197	0.064757908	38.85474505
M5123	2B	777295189	0.033149903	0.113402062	99	0.029485141	0.079406461	0.074011008	44.4066051
M14786	7A	89214940	0.033235755	0.402061856	99	0.029485141	0.079356519	0.107018083	-64.21084954
M7532	3B	550313136	0.033345656	0.134020619	99	0.029485141	0.079292786	0.067549324	40.52959438
M5101	2B	0	0.033346859	0.381443299	99	0.029485141	0.07929209	0.053339705	-32.00382277
M11236	5B	526518472	0.033348363	0.350515464	99	0.029485141	0.079291219	0.051051274	30.6307643
M10988	5B	476806091	0.033378094	0.371134021	99	0.029485141	0.079274018	0.089583305	53.74998299
M14790	7A	1158065	0.033425855	0.288659794	99	0.029485141	0.079246419	0.064177311	38.50638641
M4529	2B	672081113	0.033439876	0.340206186	99	0.029485141	0.079238325	0.123932402	-74.35944142
M1215	1B	29514277	0.033452691	0.463917526	99	0.029485141	0.07923093	0.051706814	31.02408824
M7270	3B	347855022	0.033509499	0.432989691	99	0.029485141	0.079198186	0.048984595	-29.39075696
M12690	6A	573692004	0.033510364	0.195876289	99	0.029485141	0.079197689	0.055074372	-33.04462309
M13714	6B	0	0.03352488	0.391752577	99	0.029485141	0.079189331	0.096044308	57.62658467
M4846	2B	0	0.033608319	0.113402062	99	0.029485141	0.079141368	0.074402028	-44.64121671
M13143	6B	29496320	0.033644629	0.443298969	99	0.029485141	0.079120534	0.071364675	42.81880494
M13684	6B	707207597	0.033765934	0.422680412	99	0.029485141	0.079051109	0.051904302	31.1425815
M1757	1B	0	0.033767407	0.072164948	99	0.029485141	0.079050268	0.08155094	48.93056386
M13012	6B	395616285	0.033794444	0.144329897	99	0.029485141	0.079034831	0.062492153	-37.49529153
M14643	7A	134732313	0.033812691	0.092783505	99	0.029485141	0.07902442	0.080704379	-48.42262744
M14728	7A	495536855	0.033834436	0.340206186	99	0.029485141	0.079012021	0.058545683	35.12741002
M3455	2B	0	0.033856808	0.237113402	99	0.029485141	0.078999274	0.06519391	-39.11634591
M9044	4A	747308026	0.033937221	0.298969072	99	0.029485141	0.078953529	0.053444572	-32.06674312
M13181	6B	93428436	0.033994945	0.453608247	99	0.029485141	0.078920762	0.046018583	-27.61114961
M309	1A	362317345	0.034029053	0.216494845	99	0.029485141	0.078901428	0.065727379	39.43642764
M3506	2B	24887527	0.034058591	0.216494845	99	0.029485141	0.078884702	0.051227247	-30.73634844
M4239	2B	694912630	0.034159132	0.371134021	99	0.029485141	0.078827885	0.051468512	-30.88110741
M3609	2B	46601701	0.034163249	0.443298969	99	0.029485141	0.078825562	0.07548304	45.28982393
M14830	7A	651721988	0.034208983	0.412371134	99	0.029485141	0.078799779	0.09059526	-54.35715594
M10108	5A	473093367	0.034217675	0.288659794	99	0.029485141	0.078794883	0.073024605	-43.81476302
M8661	4A	176342807	0.034229293	0.041237113	99	0.029485141	0.078788341	0.10653596	63.92157627
M3860	2B	657158433	0.034289326	0.103092784	99	0.029485141	0.078754574	0.068303674	40.98220451
M10093	5A	473321191	0.034324253	0.422680412	99	0.029485141	0.078734957	0.058184075	-34.91044476
M12314	6A	0	0.034435268	0.443298969	99	0.029485141	0.078672746	0.051500872	30.90052313
M11228	5B	506961125	0.03447959	0.288659794	99	0.029485141	0.078647969	0.055714423	-33.42865354
M13885	6D	6944619	0.03449804	0.051546392	99	0.029485141	0.078637665	0.107446133	64.46767955
M9829	5A	2726256	0.034765827	0.278350515	99	0.029485141	0.078488765	0.054074072	32.44444349
M1905	1B	676717313	0.034772837	0.432989691	99	0.029485141	0.078484883	0.048270352	28.96221138
M14624	7A	199855285	0.034777512	0.381443299	99	0.029485141	0.078482295	0.04667523	28.00513824
M6369	3A	482936809	0.034824111	0.412371134	99	0.029485141	0.078456518	0.078126831	-46.87609832
M1408	1B	512275631	0.03500798	0.402061856	99	0.029485141	0.078355166	0.050176021	30.1056125
M5644	2D	587305772	0.035024815	0.237113402	99	0.029485141	0.078345914	0.053054209	-31.83252514
M9802	4D	675631336	0.035193964	0.164948454	99	0.029485141	0.078253223	0.063651311	-38.19078665
M9815	4D	507006414	0.035271363	0.484536082	99	0.029485141	0.078210967	0.0590453	35.4271797
M10986	5B	476170081	0.03554788	0.12371134	99	0.029485141	0.078060806	0.073055917	43.83355031
M9753	4D	80836783	0.035583729	0.391752577	99	0.029485141	0.078041429	0.09863451	-59.18070572
M15505	7B	0	0.035651285	0.453608247	99	0.029485141	0.078004972	0.079863173	47.91790387
M6783	3A	726107371	0.035791311	0.072164948	99	0.029485141	0.077929638	0.081606051	48.96363058
M3881	2B	151895513	0.035850712	0.381443299	99	0.029485141	0.077897776	0.107129084	-64.27745042
M7490	3B	169821972	0.035860299	0.195876289	99	0.029485141	0.077892639	0.060899971	36.5399824
M14772	7A	589124958	0.035939204	0.412371134	99	0.029485141	0.077850413	0.06025483	36.15289827
M14490	7A	53519554	0.035987673	0.340206186	99	0.029485141	0.077824524	0.057216359	34.32981564
M473	1A	544077560	0.036033622	0.463917526	99	0.029485141	0.077800015	0.059345833	-35.60749996
M408	1A	508184592	0.036049381	0.134020619	99	0.029485141	0.077791617	0.066100053	39.66003198
M11251	5B	441249939	0.036073375	0.422680412	99	0.029485141	0.077778838	0.082971429	49.7828572
M3837	2B	69275351	0.03614946	0.412371134	99	0.029485141	0.077738375	0.049648055	-29.78883284
M2594	2A	75591116	0.03619422	0.268041237	99	0.029485141	0.077714614	0.049436258	29.66175485
M5084	2B	767775157	0.03619785	0.453608247	99	0.029485141	0.077712689	0.059462226	-35.67733548
M9322	4A	730754928	0.036302527	0.206185567	99	0.029485141	0.077657248	0.05744573	34.46743797
M6115	3A	15451588	0.036331776	0.268041237	99	0.029485141	0.077641787	0.054919426	32.95165569
M9953	5A	78242526	0.03653277	0.226804124	99	0.029485141	0.0775359	0.064741401	38.84484043
M4071	2B	236583792	0.036544112	0.350515464	99	0.029485141	0.077529944	0.05293319	-31.75991379
M4991	2B	90939783	0.036643449	0.360824742	99	0.029485141	0.077477858	0.138129712	82.87782704
M13951	6D	25851482	0.036643684	0.402061856	99	0.029485141	0.077477735	0.061165983	36.69959008
M14582	7A	82636454	0.036730149	0.319587629	99	0.029485141	0.077432521	0.055007865	-33.00471887
M7894	3B	211212780	0.036840596	0.164948454	99	0.029485141	0.077374931	0.056791482	-34.07488948
M6795	3A	697506420	0.036939277	0.422680412	99	0.029485141	0.077323631	0.07755213	-46.53127771
M15392	7B	506596134	0.036943411	0.134020619	99	0.029485141	0.077321486	0.069136877	-41.48212618
M11183	5B	436258122	0.03707289	0.494845361	99	0.029485141	0.077254405	0.076605811	45.96348662
M7644	3B	492199973	0.03713587	0.175257732	99	0.029485141	0.077221867	0.066573094	39.94385621
M6114	3A	32420986	0.03723146	0.494845361	99	0.029485141	0.077172593	0.051192104	30.71526241
M14738	7A	542907733	0.037241696	0.422680412	99	0.029485141	0.077167324	0.047976961	-28.78617639
M6541	3A	501061731	0.037289115	0.175257732	99	0.029485141	0.077142938	0.057727176	-34.63630569
M11254	5B	624609798	0.037429371	0.432989691	99	0.029485141	0.077071002	0.081945547	49.16732801
M2966	2A	705340913	0.037547976	0.072164948	99	0.029485141	0.077010395	0.080010292	48.00617512
M11503	5B	142781109	0.037652067	0.237113402	99	0.029485141	0.076957373	0.062438673	-37.46320399
M12976	6B	2439812	0.03772797	0.340206186	99	0.029485141	0.076918807	0.048981597	-29.38895806
M10875	5B	524047080	0.037752441	0.474226804	99	0.029485141	0.076906392	0.074890918	44.93455071
M6933	3B	4919056	0.037792365	0.175257732	99	0.029485141	0.076886154	0.054387496	-32.63249789
M10211	5A	512585815	0.037822616	0.18556701	99	0.029485141	0.076870835	0.075699769	-45.41986125
M3876	2B	730608229	0.03786226	0.350515464	99	0.029485141	0.076850778	0.070401061	42.24063642
M9291	4A	727128715	0.037866423	0.391752577	99	0.029485141	0.076848673	0.051973584	-31.18415059
M427	1A	514770962	0.037866498	0.268041237	99	0.029485141	0.076848635	0.061158579	-36.69514732
M13512	6B	96547784	0.037876467	0.06185567	99	0.029485141	0.076843596	0.088413634	53.04818058
M6748	3A	716847034	0.037893533	0.381443299	99	0.029485141	0.076834973	0.095657258	57.39435499
M865	1B	496978998	0.037942226	0.474226804	99	0.029485141	0.076810391	0.06842885	41.05730973
M720	1B	6072803	0.037955636	0.020618557	99	0.029485141	0.076803627	0.142138683	85.28321
M14902	7A	693025273	0.037972541	0.113402062	99	0.029485141	0.076795104	0.077898479	46.7390872
M11570	5B	685970589	0.038153952	0.164948454	99	0.029485141	0.076703895	0.064838429	-38.90305746
M13874	6D	2953198	0.038168759	0.134020619	99	0.029485141	0.076696471	0.070448387	-42.26903225
M5573	2D	476041769	0.038187169	0.06185567	99	0.029485141	0.076687244	0.08451745	-50.71046973
M3803	2B	102028478	0.038307095	0.319587629	99	0.029485141	0.076627258	0.207064793	124.2388756
M7458	3B	257283671	0.038315709	0.226804124	99	0.029485141	0.076622957	0.057928825	-34.75729519
M5310	2B	795281951	0.038322323	0.072164948	99	0.029485141	0.076619655	0.092539427	-55.52365627
M11032	5B	487460716	0.038473106	0.309278351	99	0.029485141	0.07654455	0.056579873	-33.94792355
M15530	7B	0	0.038511833	0.474226804	99	0.029485141	0.07652531	0.055061199	-33.03671939
M3767	2B	94165247	0.038718934	0.329896907	99	0.029485141	0.076422773	0.105852294	-63.5113762
M7526	3B	536049099	0.038884011	0.103092784	99	0.029485141	0.07634146	0.074683132	-44.80987945
M15222	7B	36484341	0.038895143	0.257731959	99	0.029485141	0.07633599	0.054015587	-32.40935234
M3252	2A	759751315	0.038936206	0.154639175	99	0.029485141	0.076315827	0.059068153	-35.44089184
M11042	5B	630923004	0.039021662	0.340206186	99	0.029485141	0.076273938	0.056557112	-33.93426742
M3095	2A	610377425	0.039070837	0.371134021	99	0.029485141	0.076249878	0.045179988	-27.10799255
M12358	6A	25429158	0.039124302	0.082474227	99	0.029485141	0.076223756	0.077662039	-46.59722351
M4174	2B	388821817	0.039130412	0.175257732	99	0.029485141	0.076220773	0.058115139	-34.86908368
M4124	2B	581433203	0.03915826	0.329896907	99	0.029485141	0.076207184	0.088459433	-53.07565973
M3968	2B	176172344	0.039281445	0.453608247	99	0.029485141	0.076147197	0.064331066	-38.59863936
M8437	3D	523552116	0.039376086	0.422680412	99	0.029485141	0.076101247	0.058986778	-35.39206654
M15150	7A	734102612	0.039379671	0.144329897	99	0.029485141	0.076099508	0.057371388	34.42283262
M12657	6A	574225981	0.039521779	0.288659794	99	0.029485141	0.076030739	0.045708642	-27.42518495
M15328	7B	69218120	0.039583373	0.463917526	99	0.029485141	0.076001015	0.066512884	39.90773058
M2475	2A	21041620	0.039683403	0.474226804	99	0.029485141	0.075952846	0.107324932	-64.39495936
M4237	2B	693041722	0.039693746	0.453608247	99	0.029485141	0.075947873	0.053142672	-31.88560331
M2572	2A	71172019	0.039810711	0.113402062	99	0.029485141	0.075891729	0.067849695	-40.70981728
M2443	2A	487248365	0.039953751	0.412371134	99	0.029485141	0.075823309	0.069452219	41.6713314
M10045	5A	454808313	0.039967501	0.288659794	99	0.029485141	0.075816746	0.064262819	38.55769122
M10077	5A	474478884	0.039983793	0.257731959	99	0.029485141	0.075808972	0.065239964	39.14397861
M11004	5B	408219618	0.04001329	0.195876289	99	0.029485141	0.075794907	0.066602021	-39.96121258
M4780	2B	730646260	0.040162948	0.371134021	99	0.029485141	0.075723714	0.113174818	67.90489062
M9761	4D	347481014	0.040169184	0.226804124	99	0.029485141	0.075720753	0.05913705	35.48223009
M13835	6B	0	0.040181214	0.412371134	99	0.029485141	0.075715044	0.047048119	-28.22887139
M3605	2B	163007189	0.040217836	0.422680412	99	0.029485141	0.075697674	0.04416741	-26.50044589
M2693	2A	511924367	0.040349161	0.463917526	99	0.029485141	0.075635525	0.106208884	63.72533015
M10023	5A	423174439	0.040381403	0.371134021	99	0.029485141	0.0756203	0.058104148	34.86248888
M62	1A	4497727	0.040521284	0.371134021	99	0.029485141	0.075554396	0.069366435	41.61986116
M5665	2D	0	0.040584085	0.432989691	99	0.029485141	0.075524887	0.054267368	-32.56042065
M4477	2B	599853339	0.040584304	0.257731959	99	0.029485141	0.075524784	0.054630167	-32.77810039
M6849	3A	725268290	0.040606088	0.051546392	99	0.029485141	0.075514559	0.094270333	-56.56219981
M6844	3A	805255592	0.040765467	0.360824742	99	0.029485141	0.075439932	0.052195949	-31.3175693
M9752	4D	64710758	0.040776811	0.298969072	99	0.029485141	0.075434632	0.05719514	34.31708417
M9720	4D	580089641	0.040776811	0.298969072	99	0.029485141	0.075434632	0.05719514	-34.31708417
M11717	5B	658559642	0.040786824	0.350515464	99	0.029485141	0.075429955	0.063676028	-38.20561668
M8465	3D	553331262	0.040831446	0.494845361	99	0.029485141	0.075409128	0.071875724	43.12543415
M8317	3D	31446070	0.040906537	0.319587629	99	0.029485141	0.075374136	0.053631298	32.17877855
M13890	6D	6268088	0.040907897	0.412371134	99	0.029485141	0.075373503	0.045782279	27.46936725
M8786	4A	596971035	0.04106001	0.381443299	99	0.029485141	0.075302831	0.09655335	-57.93200984
M1783	1B	557155175	0.041154161	0.422680412	99	0.029485141	0.075259229	0.052291107	-31.37466398
M1469	1B	42142948	0.04119547	0.082474227	99	0.029485141	0.075240131	0.074733525	-44.84011516
M14025	6D	78756505	0.041213632	0.463917526	99	0.029485141	0.075231741	0.081789453	49.07367189
M9731	4D	0	0.041231155	0.422680412	99	0.029485141	0.075223651	0.049652505	29.79150278
M5140	2B	785074409	0.041281131	0.402061856	99	0.029485141	0.075200596	0.062022347	-37.2134083
M5092	2B	172418924	0.041396605	0.381443299	99	0.029485141	0.075147438	0.0467283	-28.03698022
M2216	1D	435046048	0.041481512	0.154639175	99	0.029485141	0.075108454	0.060632932	36.37975918
M1275	1B	432597563	0.041482893	0.350515464	99	0.029485141	0.07510782	0.089082896	53.44973768
M465	1A	495072681	0.041488089	0.164948454	99	0.029485141	0.075105437	0.064604639	38.76278363
M833	1B	21523277	0.041500375	0.329896907	99	0.029485141	0.075099804	0.094938188	-56.96291264
M811	1B	0	0.041507221	0.443298969	99	0.029485141	0.075096666	0.057558911	34.5353463
M12944	6A	468839603	0.041523021	0.422680412	99	0.029485141	0.075089426	0.053506898	32.10413859
M13445	6B	12671031	0.041569258	0.371134021	99	0.029485141	0.075068255	0.053079124	-31.84747432
M167	1A	28762094	0.041652414	0.329896907	99	0.029485141	0.075030242	0.105607819	-63.36469127
M13013	6B	75993442	0.041708991	0.474226804	99	0.029485141	0.075004426	0.059629181	35.77750879
M650	1A	132445223	0.041795501	0.453608247	99	0.029485141	0.074965024	0.070012651	42.00759059
M13597	6B	675620421	0.041824498	0.298969072	99	0.029485141	0.074951836	0.079908917	47.94534993
M12603	6A	532659325	0.041834793	0.494845361	99	0.029485141	0.074947156	0.056671419	34.00285129
M9088	4A	697825160	0.041892862	0.144329897	99	0.029485141	0.074920784	0.061142351	36.68541054
M14261	7A	0	0.041923122	0.443298969	99	0.029485141	0.074907056	0.073222751	43.93365073
M1337	1B	380472532	0.04195654	0.463917526	99	0.029485141	0.074891908	0.044120497	26.47229809
M10092	5A	473321191	0.041985647	0.381443299	99	0.029485141	0.074878725	0.069008029	41.40481718
M3721	2B	49874133	0.042004195	0.041237113	99	0.029485141	0.074870329	0.100786697	-60.47201793
M5658	2D	579761048	0.042042418	0.051546392	99	0.029485141	0.07485304	0.091218386	54.73103175
M783	1B	530442292	0.042162972	0.402061856	99	0.029485141	0.074798621	0.069348075	-41.60884497
M15492	7B	206170311	0.042256354	0.082474227	99	0.029485141	0.074756581	0.080847586	48.50855167
M4793	2B	724734789	0.042340529	0.051546392	99	0.029485141	0.074718772	0.091474474	-54.88468444
M11880	5B	743187	0.042341413	0.412371134	99	0.029485141	0.074718375	0.093731593	56.23895585
M13900	6D	16512596	0.042364362	0.350515464	99	0.029485141	0.074708081	0.059543161	-35.72589662
M14758	7A	585063469	0.042377059	0.443298969	99	0.029485141	0.074702388	0.079725028	-47.83501673
M6005	2D	642133932	0.042473128	0.350515464	99	0.029485141	0.074659374	0.061023234	36.61394064
M11079	5B	505694656	0.042530031	0.288659794	99	0.029485141	0.074633946	0.062524478	37.51468673
M1218	1B	2308496	0.042803007	0.092783505	99	0.029485141	0.074512463	0.098251821	-58.95109271
M4424	2B	544170551	0.04286389	0.051546392	99	0.029485141	0.07448548	0.095912113	-57.54726759
M2824	2A	535417965	0.042888014	0.432989691	99	0.029485141	0.074474801	0.062354982	-37.41298914
M162	1A	24574724	0.042962184	0.412371134	99	0.029485141	0.074442005	0.053514175	-32.10850476
M13742	6B	0	0.042971017	0.309278351	99	0.029485141	0.074438104	0.046176583	-27.70594995
M13715	6B	0	0.043042764	0.453608247	99	0.029485141	0.074406445	0.068382495	-41.02949713
M13040	6B	0	0.043094725	0.340206186	99	0.029485141	0.074383552	0.080740572	-48.44434324
M5072	2B	769262952	0.043139014	0.237113402	99	0.029485141	0.074364062	0.060239291	36.14357481
M9033	4A	663141060	0.043247645	0.082474227	99	0.029485141	0.074316349	0.086067543	51.64052586
M9416	4A	1535331	0.043345419	0.030927835	99	0.029485141	0.074273514	0.155612025	93.36721504
M14882	7A	692500947	0.043406225	0.030927835	99	0.029485141	0.074246927	0.116218727	-69.73123621
M5335	2B	789673158	0.043408563	0.443298969	99	0.029485141	0.074245905	0.065191949	39.11516948
M631	1A	669220097	0.043426497	0.350515464	99	0.029485141	0.074238072	0.04507062	-27.04237223
M940	1B	171130928	0.043660218	0.391752577	99	0.029485141	0.074136299	0.052135419	31.28125157
M5167	2B	779863093	0.043811528	0.041237113	99	0.029485141	0.074070723	0.105484221	-63.29053277
M14009	6D	135430800	0.043832885	0.350515464	99	0.029485141	0.074061487	0.060420881	-36.25252836
M9809	4D	497938965	0.043861013	0.453608247	99	0.029485141	0.074049329	0.067860924	-40.71655419
M3894	2B	113915239	0.043897368	0.237113402	99	0.029485141	0.074033628	0.064858733	38.91523996
M7217	3B	359850321	0.044115061	0.257731959	99	0.029485141	0.073939902	0.056034191	33.62051486
M15188	7B	32548566	0.044315267	0.175257732	99	0.029485141	0.073854142	0.054598606	-32.75916353
M14792	7A	618115880	0.044363313	0.24742268	99	0.029485141	0.073833623	0.062859492	37.71569491
M9075	4A	643624450	0.044541697	0.144329897	99	0.029485141	0.073757647	0.062647397	37.58843794
M2053	1D	41915193	0.044601091	0.360824742	99	0.029485141	0.073732423	0.152443471	91.46608254
M6011	2D	640948762	0.044601091	0.360824742	99	0.029485141	0.073732423	0.152443471	91.46608254
M798	1B	247051054	0.044601091	0.360824742	99	0.029485141	0.073732423	0.152443471	91.46608254
M872	1B	2431679	0.044601091	0.360824742	99	0.029485141	0.073732423	0.152443471	91.46608254
M15427	7B	539790379	0.044601091	0.360824742	99	0.029485141	0.073732423	0.152443471	-91.46608254
M15431	7B	556686638	0.044601091	0.360824742	99	0.029485141	0.073732423	0.152443471	-91.46608254
M10958	5B	581344245	0.044743083	0.06185567	99	0.029485141	0.073672265	0.084469564	50.68173827
M9406	4A	0	0.044804705	0.432989691	99	0.029485141	0.073646222	0.063898623	38.3391741
M1132	1B	0	0.044849711	0.113402062	99	0.029485141	0.073627225	0.075129994	45.07799632
M9838	5A	6179460	0.044917961	0.453608247	99	0.029485141	0.073598456	0.069087032	41.45221901
M5122	2B	779147544	0.044951542	0.082474227	99	0.029485141	0.073584318	0.07447134	-44.68280421
M14265	7A	11415890	0.045022344	0.113402062	99	0.029485141	0.073554546	0.065951495	-39.57089671
M11169	5B	91679153	0.045063651	0.319587629	99	0.029485141	0.0735372	0.056059639	-33.63578339
M10047	5A	475372989	0.045077431	0.391752577	99	0.029485141	0.073531417	0.060598754	36.35925268
M699	1A	590240846	0.04514441	0.288659794	99	0.029485141	0.073503336	0.104421905	-62.65314315
M11437	5B	422432511	0.045183951	0.309278351	99	0.029485141	0.073486779	0.048170859	-28.90251541
M8458	3D	666983570	0.045227114	0.329896907	99	0.029485141	0.073468724	0.054413214	-32.64792863
M2527	2A	42150492	0.045261382	0.329896907	99	0.029485141	0.073454403	0.052747086	-31.64825177
M980	1B	6341226	0.0455036	0.350515464	99	0.029485141	0.073353503	0.045644573	-27.386744
M9328	4A	8252743	0.045574387	0.412371134	99	0.029485141	0.073324125	0.100594345	60.35660713
M9161	4A	708083352	0.045593558	0.474226804	99	0.029485141	0.073316176	0.069808164	41.88489831
M3462	2B	8479321	0.045929323	0.474226804	99	0.029485141	0.073177551	0.043750978	-26.25058665
M6106	3A	283594306	0.04599231	0.237113402	99	0.029485141	0.073151666	0.053421898	32.05313899
M1495	1B	563066992	0.046116075	0.463917526	99	0.029485141	0.073100916	0.046951925	-28.17115514
M15418	7B	538125772	0.046117257	0.474226804	99	0.029485141	0.073100432	0.065093503	39.05610181
M4213	2B	93016882	0.046210254	0.381443299	99	0.029485141	0.073062396	0.054813599	32.88815944
M3161	2A	761322496	0.046221823	0.443298969	99	0.029485141	0.07305767	0.075826212	45.49572693
M665	1A	589629264	0.046415449	0.12371134	99	0.029485141	0.072978759	0.066705124	-40.02307424
M9942	5A	52738363	0.046427549	0.030927835	99	0.029485141	0.07297384	0.123011589	73.80695365
M10873	5B	431870071	0.046495102	0.298969072	99	0.029485141	0.0729464	0.054085938	-32.4515627
M14842	7A	671752070	0.046553707	0.298969072	99	0.029485141	0.07292263	0.051523868	-30.91432097
M5884	2D	605883075	0.046570152	0.072164948	99	0.029485141	0.072915965	0.083666573	-50.19994365
M1572	1B	724589345	0.046654625	0.381443299	99	0.029485141	0.072881772	0.051019719	30.61183154
M9755	4D	220375714	0.04668862	0.402061856	99	0.029485141	0.07286803	0.089362204	53.6173221
M1088	1B	262945027	0.046693423	0.103092784	99	0.029485141	0.072866089	0.068038183	40.82290995
M10096	5A	470192572	0.046727182	0.402061856	99	0.029485141	0.072852454	0.047931233	28.75873983
M15497	7B	374288014	0.046882646	0.350515464	99	0.029485141	0.072789803	0.055666638	33.3999827
M1538	1B	568960943	0.046893749	0.474226804	99	0.029485141	0.072785337	0.051890058	-31.13403461
M7154	3B	24262407	0.046941996	0.319587629	99	0.029485141	0.072765943	0.089871255	53.92275301
M3648	2B	46670271	0.046999126	0.164948454	99	0.029485141	0.072743007	0.056163046	-33.69782779
M7059	3B	13505109	0.047128197	0.309278351	99	0.029485141	0.072691299	0.141314138	84.78848258
M9922	5A	39746104	0.04716161	0.474226804	99	0.029485141	0.072677938	0.056490047	-33.89402842
M13620	6B	679285878	0.047282674	0.113402062	99	0.029485141	0.072629612	0.067389419	40.43365149
M9944	5A	632673082	0.047291502	0.237113402	99	0.029485141	0.072626093	0.060285776	36.17146589
M10167	5A	496610220	0.047307135	0.154639175	99	0.029485141	0.072619863	0.066824586	40.09475167
M5198	2B	647814104	0.047451417	0.288659794	99	0.029485141	0.072562474	0.056950856	-34.17051368
M14271	7A	9517687	0.04748337	0.463917526	99	0.029485141	0.07254979	0.058781805	-35.26908293
M12895	6A	0	0.04748945	0.278350515	99	0.029485141	0.072547377	0.064584261	38.75055679
M6055	3A	0	0.047498503	0.484536082	99	0.029485141	0.072543786	0.056296671	-33.77800283
M6335	3A	369293414	0.047501196	0.082474227	99	0.029485141	0.072542717	0.073425926	44.05555545
M200	1A	53457937	0.047516912	0.010309278	99	0.029485141	0.072536485	0.191139246	-114.6835477
M5264	2B	800780319	0.047516912	0.010309278	99	0.029485141	0.072536485	0.191139246	-114.6835477
M10586	5B	576692587	0.047516912	0.010309278	99	0.029485141	0.072536485	0.191139246	114.6835477
M5260	2B	800780319	0.047516912	0.010309278	99	0.029485141	0.072536485	0.191139246	114.6835477
M29	1A	150794362	0.04753514	0.381443299	99	0.029485141	0.072529258	0.078679999	47.20799969
M5642	2D	587305772	0.047563816	0.226804124	99	0.029485141	0.072517896	0.052850515	31.71030928
M13286	6B	217195685	0.047632191	0.092783505	99	0.029485141	0.072490834	0.073232422	-43.93945326
M6429	3A	517095336	0.047795741	0.381443299	99	0.029485141	0.07242627	0.101912624	-61.14757412
M10517	5A	685961373	0.047835371	0.329896907	99	0.029485141	0.072410662	0.082501718	49.50103067
M5900	2D	608266290	0.047917907	0.12371134	99	0.029485141	0.072378198	0.064208519	38.52511151
M3694	2B	68579934	0.047920388	0.453608247	99	0.029485141	0.072377223	0.042919735	25.75184088
M10378	5A	569288642	0.048169962	0.24742268	99	0.029485141	0.07227943	0.050051035	-30.03062129
M9682	4B	108226085	0.048290828	0.041237113	99	0.029485141	0.072232265	0.098636165	-59.18169873
M9391	4A	732814470	0.048387306	0.24742268	99	0.029485141	0.072194708	0.050641118	30.38467052
M3214	2A	650883573	0.048473586	0.268041237	99	0.029485141	0.072161188	0.073081404	43.8488421
M5093	2B	774088019	0.048486206	0.453608247	99	0.029485141	0.072156291	0.059361568	-35.616941
M5018	2B	766527144	0.048527802	0.175257732	99	0.029485141	0.072140159	0.055612584	33.3675504
M8356	3D	45029418	0.048657112	0.463917526	99	0.029485141	0.072090102	0.062984518	37.79071091
M3717	2B	77176639	0.048711207	0.402061856	99	0.029485141	0.072069204	0.088650928	-53.19055673
M1612	1B	588284390	0.048918341	0.164948454	99	0.029485141	0.071989415	0.059540221	35.72413267
M13382	6B	449771887	0.049057169	0.24742268	99	0.029485141	0.07193614	0.047969718	-28.78183086
M8744	4A	536854630	0.049148972	0.051546392	99	0.029485141	0.071901	0.091275484	54.76529027
M11168	5B	444349623	0.049178609	0.432989691	99	0.029485141	0.07188967	0.047428942	-28.45736491
M3867	2B	116317273	0.049193961	0.381443299	99	0.029485141	0.071883804	0.059062139	35.43728331
M11119	5B	540054438	0.049204452	0.020618557	99	0.029485141	0.071879797	0.137143204	82.28592247
M3650	2B	46670271	0.049204452	0.020618557	99	0.029485141	0.071879797	0.137143204	82.28592247
M3549	2B	28998601	0.049216385	0.463917526	99	0.029485141	0.07187524	0.043761241	26.25674468
M9340	4A	0	0.049270292	0.195876289	99	0.029485141	0.071854669	0.056640497	-33.98429812
M12762	6A	595578856	0.049301664	0.422680412	99	0.029485141	0.071842708	0.053839632	-32.30377942
M13936	6D	14987960	0.049343076	0.422680412	99	0.029485141	0.071826933	0.073945671	44.36740284
M11395	5B	548956394	0.049350103	0.206185567	99	0.029485141	0.071824257	0.057345073	34.40704393
M4269	2B	365499316	0.049438664	0.371134021	99	0.029485141	0.071790573	0.054728854	-32.83731234
M6118	3A	15478548	0.049446361	0.463917526	99	0.029485141	0.071787648	0.043363713	-26.0182277
M7735	3B	688163825	0.049544977	0.391752577	99	0.029485141	0.071750222	0.086027442	-51.61646527
M8916	4A	330012453	0.049678709	0.298969072	99	0.029485141	0.071699596	0.088917152	-53.3502912
M9689	4B	667731312	0.049681548	0.051546392	99	0.029485141	0.071698523	0.091294912	54.77694712
M1399	1B	520682469	0.04968356	0.412371134	99	0.029485141	0.071697762	0.046241486	27.74489146
M2386	2A	0	0.049698202	0.484536082	99	0.029485141	0.071692229	0.097351223	-58.4107339
M2725	2A	0	0.049698202	0.484536082	99	0.029485141	0.071692229	0.097351223	-58.4107339
M6634	3A	292579611	0.04971836	0.474226804	99	0.029485141	0.071684614	0.061750464	37.05027818
M10209	5A	512599884	0.049726969	0.391752577	99	0.029485141	0.071681363	0.053951058	32.37063486
M7243	3B	0	0.049840882	0.484536082	99	0.029485141	0.0716384	0.041372033	24.82321954
M1303	1B	399336171	0.049880601	0.103092784	99	0.029485141	0.071623444	0.06381822	38.2909321
M7402	3B	592199044	0.049890384	0.12371134	99	0.029485141	0.071619763	0.060630666	36.3783996
M7061	3B	13505109	0.049924873	0.309278351	99	0.029485141	0.07160679	0.054642398	32.78543868
M653	1A	7014108	0.050038339	0.309278351	99	0.029485141	0.071564177	0.048084555	-28.85073287
M13383	6B	203295082	0.050100157	0.443298969	99	0.029485141	0.071541006	0.066857263	-40.11435805
M13129	6B	55579051	0.050158078	0.268041237	99	0.029485141	0.071519322	0.059277774	35.56666425
M14611	7A	106411744	0.05020153	0.030927835	99	0.029485141	0.071503073	0.111193127	-66.71587617
M14263	7A	0	0.050267395	0.422680412	99	0.029485141	0.071478471	0.049738272	-29.84296335
M1129	1B	75840479	0.050336018	0.113402062	99	0.029485141	0.071452876	0.065205159	39.12309517
M1383	1B	468389248	0.050338896	0.402061856	99	0.029485141	0.071451803	0.05010785	30.06471007
M14723	7A	511543716	0.050381016	0.432989691	99	0.029485141	0.071436113	0.055186207	-33.11172447
M2373	2A	18495149	0.050450649	0.24742268	99	0.029485141	0.071410205	0.04813313	28.87987798
M11336	5B	529608885	0.050459807	0.041237113	99	0.029485141	0.0714068	0.096545335	57.92720075
M13920	6D	12435844	0.050656131	0.309278351	99	0.029485141	0.071333974	0.051954175	31.17250485
M7356	3B	147794872	0.050688318	0.381443299	99	0.029485141	0.071322063	0.095264565	-57.15873928
M7744	3B	544441207	0.050688318	0.381443299	99	0.029485141	0.071322063	0.095264565	-57.15873928
M9599	4B	785378125	0.05071297	0.463917526	99	0.029485141	0.071312946	0.058500338	35.10020278
M6835	3A	33345150	0.050768283	0.391752577	99	0.029485141	0.071292508	0.084198609	50.51916532
M6863	3A	0	0.050768283	0.391752577	99	0.029485141	0.071292508	0.084198609	-50.51916532
M2571	2A	71172019	0.050771427	0.371134021	99	0.029485141	0.071291346	0.050702946	30.42176753
M10049	5A	475372989	0.050781738	0.06185567	99	0.029485141	0.071287539	0.080619628	48.37177688
M9032	4A	48707567	0.05081516	0.082474227	99	0.029485141	0.071275205	0.08037715	-48.22629006
M2844	2A	532080572	0.050854456	0.474226804	99	0.029485141	0.071260713	0.058786307	-35.27178431
M6656	3A	703344484	0.050980488	0.154639175	99	0.029485141	0.071214317	0.063738702	-38.24322114
M14668	7A	126871451	0.051105157	0.381443299	99	0.029485141	0.071168544	0.056689275	34.01356474
M9065	4A	590854832	0.051116103	0.422680412	99	0.029485141	0.071164531	0.08077747	-48.46648187
M6764	3A	780291542	0.051155619	0.412371134	99	0.029485141	0.07115005	0.074372626	-44.62357546
M9553	4B	554966424	0.051213064	0.494845361	99	0.029485141	0.071129022	0.070994788	-42.59687251
M2335	2A	12351854	0.051213839	0.474226804	99	0.029485141	0.071128738	0.095706739	-57.42404346
M1871	1B	573243014	0.051366769	0.422680412	99	0.029485141	0.07107288	0.062284382	37.37062934
M10323	5A	164201064	0.051368717	0.381443299	99	0.029485141	0.07107217	0.057670631	34.60237871
M5411	2D	22205043	0.051479193	0.144329897	99	0.029485141	0.071031931	0.056429904	-33.85794248
M7473	3B	389310464	0.051525628	0.402061856	99	0.029485141	0.071015046	0.079937202	-47.96232118
M2233	1D	583819101	0.051542324	0.309278351	99	0.029485141	0.071008979	0.051733825	31.04029475
M10989	5B	584276433	0.051587371	0.278350515	99	0.029485141	0.07099262	0.04904623	-29.42773805
M8599	4A	4240767	0.051602562	0.134020619	99	0.029485141	0.070987106	0.062192051	37.31523087
M2286	1D	0	0.051611723	0.474226804	99	0.029485141	0.070983782	0.053527808	-32.11668457
M268	1A	339927631	0.051645642	0.030927835	99	0.029485141	0.070971481	0.110586276	-66.3517659
M5279	2B	549670301	0.051665436	0.216494845	99	0.029485141	0.070964306	0.062012273	37.20736365
M14872	7A	682339108	0.051700773	0.474226804	99	0.029485141	0.070951505	0.067135196	40.28111758
M4098	2B	305774933	0.051891838	0.051546392	99	0.029485141	0.070882451	0.088512548	-53.10752853
M14286	7A	0	0.051952553	0.422680412	99	0.029485141	0.070860565	0.074505372	44.70322349
M3458	2B	563859723	0.051965613	0.092783505	99	0.029485141	0.070855861	0.075945838	45.56750272
M3624	2B	24266934	0.052057054	0.020618557	99	0.029485141	0.07082296	0.132557092	-79.53425544
M319	1A	471700683	0.052261599	0.298969072	99	0.029485141	0.070749589	0.063651765	38.19105875
M14189	7A	20772971	0.05235689	0.030927835	99	0.029485141	0.070715513	0.114665962	-68.79957716
M7577	3B	525614613	0.052361749	0.371134021	99	0.029485141	0.070713777	0.063926881	-38.35612866
M9786	4D	571615679	0.052472587	0.484536082	99	0.029485141	0.07067423	0.048922621	29.35357284
M10100	5A	453278389	0.052489199	0.278350515	99	0.029485141	0.07066831	0.059294225	-35.57653488
M13759	6B	715854244	0.052546854	0.288659794	99	0.029485141	0.070647781	0.046560435	27.9362609
M11728	5B	665685766	0.052580228	0.360824742	99	0.029485141	0.070635909	0.058614038	35.16842269
M1239	1B	488834383	0.052754868	0.329896907	99	0.029485141	0.070573915	0.082987154	-49.79229236
M12937	6A	462540109	0.052795403	0.474226804	99	0.029485141	0.070559558	0.057106882	-34.26412942
M10324	5A	164201064	0.053094565	0.24742268	99	0.029485141	0.070453961	0.04572119	-27.43271376
M5561	2D	432854196	0.053105613	0.391752577	99	0.029485141	0.070450074	0.045296177	-27.17770594
M9889	5A	48048431	0.053217313	0.237113402	99	0.029485141	0.070410819	0.056277491	-33.76649442
M1837	1B	666942323	0.053258366	0.216494845	99	0.029485141	0.070396414	0.048220461	28.93227641
M5044	2B	754864756	0.053424235	0.164948454	99	0.029485141	0.070338335	0.081891131	-49.13467863
M13628	6B	691035513	0.053510381	0.092783505	99	0.029485141	0.070308248	0.074539325	-44.72359508
M7855	3B	755711290	0.053523667	0.082474227	99	0.029485141	0.070303612	0.07251005	43.50602976
M7012	3B	489745599	0.053558872	0.329896907	99	0.029485141	0.070291335	0.053773802	32.26428093
M1546	1B	564637524	0.053643193	0.268041237	99	0.029485141	0.070261964	0.06078447	36.47068186
M7372	3B	153650205	0.053755782	0.082474227	99	0.029485141	0.070222824	0.074290846	-44.57450745
M7401	3B	592199044	0.05383369	0.350515464	99	0.029485141	0.070195792	0.139964494	83.9786965
M10159	5A	446652509	0.053839541	0.453608247	99	0.029485141	0.070193764	0.043280424	25.9682543
M3114	2A	747610057	0.0538586	0.24742268	99	0.029485141	0.070187158	0.04772701	28.63620584
M15122	7A	729402509	0.053924151	0.381443299	99	0.029485141	0.070164458	0.0503502	-30.21012028
M7475	3B	304279362	0.053956419	0.319587629	99	0.029485141	0.070153294	0.105726986	-63.43619137
M13216	6B	0	0.053978395	0.340206186	99	0.029485141	0.070145696	0.047336636	28.4019815
M6129	3A	22234939	0.05406064	0.12371134	99	0.029485141	0.070117287	0.070497412	-42.29844697
M4928	2B	619961495	0.054150886	0.381443299	99	0.029485141	0.070086169	0.051945896	-31.16753734
M3918	2B	160769042	0.054171811	0.329896907	99	0.029485141	0.070078961	0.043755271	-26.25316274
M6786	3A	595019227	0.054200769	0.113402062	99	0.029485141	0.070068992	0.062349075	37.40944514
M11583	5B	586524432	0.054249367	0.381443299	99	0.029485141	0.070052274	0.093163385	-55.89803075
M439	1A	530199695	0.054306454	0.24742268	99	0.029485141	0.070032657	0.052361318	31.41679085
M10933	5B	461697041	0.054365805	0.175257732	99	0.029485141	0.070012285	0.05887063	-35.32237804
M11827	5B	692755670	0.054412502	0.298969072	99	0.029485141	0.069996273	0.060041833	-36.02510009
M7632	3B	437778419	0.054430333	0.381443299	99	0.029485141	0.069990163	0.089904174	53.94250418
M6866	3A	739951852	0.054460596	0.06185567	99	0.029485141	0.069979798	0.08195643	49.17385819
M6862	3A	0	0.054460596	0.06185567	99	0.029485141	0.069979798	0.08195643	-49.17385819
M8255	3D	7574572	0.054482959	0.371134021	99	0.029485141	0.069972143	0.04624862	27.74917194
M13719	6B	0	0.05450475	0.494845361	99	0.029485141	0.069964686	0.062341499	-37.4048994
M8922	4A	651777951	0.054582431	0.195876289	99	0.029485141	0.069938132	0.052559742	-31.5358451
M11685	5B	275637230	0.054671766	0.226804124	99	0.029485141	0.069907644	0.053619856	32.17191352
M15239	7B	57681594	0.054732561	0.12371134	99	0.029485141	0.069886927	0.065266082	39.15964925
M10139	5A	482358282	0.054800082	0.391752577	99	0.029485141	0.069863947	0.058340487	35.00429246
M4679	2B	0	0.054877419	0.402061856	99	0.029485141	0.069837664	0.05409336	-32.45601597
M12257	6A	0	0.054942229	0.422680412	99	0.029485141	0.069815669	0.0478328	-28.69967995
M3102	2A	744245837	0.054990883	0.226804124	99	0.029485141	0.069799175	0.052681421	-31.60885265
M15083	7A	723305650	0.05504895	0.288659794	99	0.029485141	0.069779511	0.053763522	-32.25811328
M12627	6A	566632377	0.055113817	0.350515464	99	0.029485141	0.069757571	0.050015808	30.00948488
M14784	7A	606564392	0.05516802	0.329896907	99	0.029485141	0.069739259	0.047652624	28.59157413
M10652	5B	48311248	0.055346211	0.402061856	99	0.029485141	0.069679194	0.077174871	-46.30492251
M1280	1B	438693323	0.05545962	0.422680412	99	0.029485141	0.069641075	0.069265295	41.55917722
M1341	1B	420692245	0.055499624	0.072164948	99	0.029485141	0.069627649	0.074585482	44.75128918
M829	1B	441543004	0.055547157	0.412371134	99	0.029485141	0.06961171	0.069213439	41.52806328
M6794	3A	729609868	0.055567802	0.092783505	99	0.029485141	0.069604791	0.066446577	-39.86794627
M12190	6A	9461899	0.055585814	0.360824742	99	0.029485141	0.069598758	0.062365723	37.4194337
M11015	5B	485806429	0.055591541	0.371134021	99	0.029485141	0.06959684	0.044751306	26.85078377
M4513	2B	299291476	0.05562544	0.340206186	99	0.029485141	0.069585491	0.067260912	-40.35654748
M10034	5A	441486802	0.05569219	0.298969072	99	0.029485141	0.069563166	0.064701342	38.82080535
M1090	1B	315459354	0.055694955	0.226804124	99	0.029485141	0.069562242	0.052191854	31.3151123
M5899	2D	608266290	0.055730436	0.391752577	99	0.029485141	0.069550388	0.099309538	59.58572285
M14420	7A	34920067	0.055812095	0.164948454	99	0.029485141	0.069523136	0.073606206	-44.16372348
M1750	1B	637894347	0.055926083	0.030927835	99	0.029485141	0.069485167	0.11029175	-66.17505018
M14603	7A	96563541	0.055986016	0.381443299	99	0.029485141	0.069465237	0.054814137	-32.88848221
M4420	2B	560269490	0.056010183	0.432989691	99	0.029485141	0.069457207	0.051467621	30.88057268
M8201	3B	825377413	0.05605356	0.340206186	99	0.029485141	0.069442804	0.048997304	29.39838238
M11241	5B	511852924	0.056129847	0.371134021	99	0.029485141	0.069417502	0.080598497	-48.35909839
M1782	1B	644598781	0.056170447	0.226804124	99	0.029485141	0.069404052	0.046478451	-27.88707039
M7719	3B	284044674	0.056200668	0.453608247	99	0.029485141	0.069394046	0.040379474	24.22768452
M4540	2B	670299111	0.056218166	0.453608247	99	0.029485141	0.069388256	0.041276419	-24.76585116
M15570	7B	653890555	0.056327328	0.402061856	99	0.029485141	0.069352176	0.08971509	-53.82905398
M14260	7A	0	0.056335069	0.24742268	99	0.029485141	0.06934962	0.044949783	26.96986985
M12992	6B	5555402	0.056468123	0.216494845	99	0.029485141	0.069305752	0.051194662	-30.7167972
M11909	5D	154782380	0.0565186	0.18556701	99	0.029485141	0.069289139	0.050149365	-30.08961877
M10184	5A	591916968	0.056804817	0.072164948	99	0.029485141	0.069195241	0.073350963	44.01057771
M7211	3B	0	0.056827106	0.371134021	99	0.029485141	0.06918795	0.111641505	-66.98490298
M9727	4D	691725837	0.056857099	0.309278351	99	0.029485141	0.069178144	0.064980025	-38.98801496
M11081	5B	529496598	0.056911999	0.226804124	99	0.029485141	0.069160209	0.055139241	-33.08354453
M5789	2D	595557034	0.056963803	0.134020619	99	0.029485141	0.069143303	0.059056765	35.43405884
M9030	4A	48707567	0.056988336	0.432989691	99	0.029485141	0.069135302	0.046796404	-28.07784229
M2755	2A	182889945	0.057008043	0.391752577	99	0.029485141	0.069128878	0.059370638	-35.62238303
M7386	3B	48000913	0.0570462	0.453608247	99	0.029485141	0.069116447	0.066297115	39.77826907
M12842	6A	112239421	0.057071537	0.309278351	99	0.029485141	0.069108197	0.048535885	29.12153076
M14688	7A	252720433	0.057077209	0.402061856	99	0.029485141	0.069106351	0.054153065	32.49183905
M1241	1B	124479537	0.057134924	0.06185567	99	0.029485141	0.069087576	0.083517382	50.11042891
M1219	1B	2308496	0.057147098	0.432989691	99	0.029485141	0.069083618	0.08028335	-48.17001004
M14368	7A	20403281	0.05730392	0.340206186	99	0.029485141	0.069032717	0.08728622	-52.37173175
M13725	6B	74684048	0.057316703	0.463917526	99	0.029485141	0.069028575	0.048189528	28.91371692
M11219	5B	628455006	0.057336682	0.226804124	99	0.029485141	0.069022102	0.058929312	35.35758733
M117	1A	112441140	0.057498473	0.422680412	99	0.029485141	0.068969778	0.057634447	-34.58066809
M9343	4A	7773196	0.057517586	0.494845361	99	0.029485141	0.068963608	0.049875584	-29.92535065
M723	1B	3569604	0.057709031	0.257731959	99	0.029485141	0.068901921	0.049528362	29.7170171
M6546	3A	0	0.057713359	0.402061856	99	0.029485141	0.068900528	0.083735621	-50.24137258
M1024	1B	12347623	0.057853493	0.051546392	99	0.029485141	0.068855518	0.085195602	-51.11736113
M4998	2B	0	0.057864613	0.144329897	99	0.029485141	0.068851952	0.059863643	-35.91818551
M9791	4D	465185311	0.05793474	0.309278351	99	0.029485141	0.068829477	0.043759218	-26.25553061
M4012	2B	194997269	0.057974448	0.371134021	99	0.029485141	0.068816763	0.043500752	-26.10045112
M5742	2D	598804526	0.057978814	0.350515464	99	0.029485141	0.068815366	0.043261678	-25.95700676
M1106	1B	100817874	0.058046505	0.216494845	99	0.029485141	0.068793717	0.059780178	35.86810678
M3078	2A	736308932	0.058240963	0.484536082	99	0.029485141	0.068731677	0.043416744	-26.05004655
M14269	7A	9517687	0.058311622	0.453608247	99	0.029485141	0.068709189	0.05673912	-34.04347191
M13418	6B	574666443	0.058374559	0.257731959	99	0.029485141	0.068689184	0.048844156	29.3064937
M11701	5B	634081712	0.058507073	0.360824742	99	0.029485141	0.068647138	0.05332343	-31.99405812
M9143	4A	304763961	0.058615474	0.319587629	99	0.029485141	0.06861282	0.052494462	31.4966771
M10715	5B	75319717	0.058736519	0.18556701	99	0.029485141	0.06857458	0.056462638	33.87758307
M6969	3B	34156784	0.058898039	0.412371134	99	0.029485141	0.068523687	0.041430636	-24.85838151
M6735	3A	720367772	0.058903026	0.092783505	99	0.029485141	0.068522118	0.065228474	39.13708414
M11657	5B	336655975	0.058941951	0.309278351	99	0.029485141	0.068509876	0.080205832	-48.12349911
M7745	3B	684637596	0.059051853	0.051546392	99	0.029485141	0.068475361	0.089277082	-53.56624898
M7271	3B	478901478	0.059076457	0.391752577	99	0.029485141	0.068467643	0.043204456	25.92267348
M1416	1B	528360171	0.059095075	0.154639175	99	0.029485141	0.068461806	0.075908874	45.54532447
M278	1A	376476439	0.059198903	0.319587629	99	0.029485141	0.068429287	0.107587046	-64.55222762
M481	1A	610154156	0.05921122	0.309278351	99	0.029485141	0.068425434	0.045853014	-27.51180865
M9415	4A	1535331	0.059316026	0.474226804	99	0.029485141	0.068392679	0.059480331	-35.68819835
M14244	7A	600721014	0.059316529	0.257731959	99	0.029485141	0.068392522	0.056823076	34.09384552
M15382	7B	470836213	0.059346607	0.113402062	99	0.029485141	0.068383133	0.064267561	-38.56053652
M1615	1B	628627682	0.059381254	0.432989691	99	0.029485141	0.068372325	0.071905467	43.14327994
M10305	5A	727382944	0.059451111	0.443298969	99	0.029485141	0.068350553	0.059920919	-35.9525513
M6807	3A	732737562	0.059494097	0.422680412	99	0.029485141	0.06833717	0.068460752	-41.07645095
M15520	7B	611412290	0.059597507	0.443298969	99	0.029485141	0.068305017	0.052865939	-31.71956341
M14982	7A	566622348	0.059658102	0.288659794	99	0.029485141	0.068286205	0.046208694	-27.7252166
M1523	1B	564653618	0.059735825	0.360824742	99	0.029485141	0.068262105	0.113211522	67.92691316
M14280	7A	13884507	0.059794727	0.402061856	99	0.029485141	0.068243863	0.073803897	44.28233808
M7227	3B	38809070	0.059889818	0.391752577	99	0.029485141	0.068214456	0.084555758	-50.73345467
M3808	3B	0	0.059889818	0.391752577	99	0.029485141	0.068214456	0.084555758	50.73345467
M9804	4D	675631336	0.059900682	0.18556701	99	0.029485141	0.068211099	0.053419639	32.05178334
M11315	5B	433216045	0.059902825	0.010309278	99	0.029485141	0.068210437	0.184817456	110.8904737
M8751	4A	0	0.059902825	0.010309278	99	0.029485141	0.068210437	0.184817456	110.8904737
M11299	5B	261777240	0.059902825	0.010309278	99	0.029485141	0.068210437	0.184817456	-110.8904737
M7166	3B	41426550	0.059902825	0.010309278	99	0.029485141	0.068210437	0.184817456	-110.8904737
M6798	3A	729162982	0.060044408	0.226804124	99	0.029485141	0.068166755	0.050916601	-30.54996062
M10852	5B	126862058	0.060127488	0.041237113	99	0.029485141	0.068141174	0.093168205	-55.90092322
M660	1A	584598710	0.060141348	0.103092784	99	0.029485141	0.06813691	0.062368623	37.42117372
M1528	1B	564653541	0.060214599	0.391752577	99	0.029485141	0.068114393	0.05189454	31.13672399
M11873	5B	345216433	0.060283217	0.226804124	99	0.029485141	0.068093328	0.073749988	-44.2499928
M8163	3B	14991361	0.060393998	0.412371134	99	0.029485141	0.068059372	0.052560189	31.53611366
M15148	7A	735704416	0.060415183	0.432989691	99	0.029485141	0.068052887	0.079244219	47.54653126
M13712	6B	464521037	0.060736742	0.453608247	99	0.029485141	0.067954744	0.068632124	41.1792745
M5995	2D	636099167	0.060748224	0.12371134	99	0.029485141	0.06795125	0.058730851	35.23851034
M5666	2D	0	0.060754597	0.494845361	99	0.029485141	0.067949311	0.047682276	28.60936558
M6746	3A	716253361	0.06083111	0.113402062	99	0.029485141	0.067926049	0.059314947	-35.58896795
M6256	3A	20184674	0.060933982	0.309278351	99	0.029485141	0.067894823	0.057329986	34.39799187
M8361	3D	58370125	0.060994341	0.474226804	99	0.029485141	0.067876528	0.05779098	34.67458799
M14024	6D	357593819	0.061046312	0.484536082	99	0.029485141	0.067860791	0.061459644	-36.87578642
M9788	4D	465587647	0.061096184	0.319587629	99	0.029485141	0.067845703	0.053408948	32.04536856
M808	1B	0	0.061174682	0.298969072	99	0.029485141	0.067821982	0.055999394	33.59963622
M1530	1B	564653541	0.061366066	0.484536082	99	0.029485141	0.067764287	0.050537903	-30.32274209
M15095	7A	723279834	0.06142271	0.432989691	99	0.029485141	0.067747248	0.077879399	-46.72763941
M3689	2B	69047995	0.061470147	0.360824742	99	0.029485141	0.067732992	0.062996809	37.79808514
M9835	5A	5650428	0.06161564	0.340206186	99	0.029485141	0.067689341	0.051793481	-31.07608842
M11170	5B	91679153	0.061666852	0.010309278	99	0.029485141	0.067674003	0.180187271	108.1123623
M3712	2B	0	0.061666852	0.010309278	99	0.029485141	0.067674003	0.180187271	-108.1123623
M8323	3D	32335084	0.061690094	0.474226804	99	0.029485141	0.067667047	0.042226828	25.33609659
M12898	6A	470053531	0.061691422	0.257731959	99	0.029485141	0.067666649	0.046789402	28.073641
M7099	3B	21948664	0.06170143	0.494845361	99	0.029485141	0.067663655	0.063833513	38.30010753
M15596	7B	654860661	0.061739123	0.12371134	99	0.029485141	0.067652382	0.059147032	-35.48821934
M2974	2A	541992663	0.061763641	0.340206186	99	0.029485141	0.067645053	0.043550978	-26.13058673
M8462	3D	150762205	0.061801774	0.144329897	99	0.029485141	0.06763366	0.056288026	-33.77281575
M6058	3A	8862385	0.061882388	0.24742268	99	0.029485141	0.067609601	0.043608978	-26.16538701
M9919	5A	40170718	0.06189674	0.484536082	99	0.029485141	0.067605322	0.059620571	35.77234289
M1927	1B	0	0.062053317	0.391752577	99	0.029485141	0.067558701	0.048258966	-28.95537976
M2608	2A	82861639	0.062057353	0.226804124	99	0.029485141	0.0675575	0.054309533	-32.58572003
M6755	3A	720367772	0.062221195	0.381443299	99	0.029485141	0.067508856	0.071881704	-43.12902265
M1221	1B	0	0.062298691	0.432989691	99	0.029485141	0.067485896	0.084921535	50.95292101
M9762	4D	347481014	0.062326536	0.206185567	99	0.029485141	0.067477653	0.049658309	-29.79498515
M13962	6D	34075472	0.06245667	0.298969072	99	0.029485141	0.067439186	0.0560508	33.63048005
M4230	2B	219214772	0.062539535	0.020618557	99	0.029485141	0.067414736	0.130830724	-78.49843455
M13121	6B	52077541	0.062555081	0.134020619	99	0.029485141	0.067410153	0.055106322	-33.06379295
M14259	7A	0	0.062601843	0.391752577	99	0.029485141	0.067396375	0.046773392	28.06403528
M9819	4D	30126321	0.062654662	0.309278351	99	0.029485141	0.067380826	0.049465713	29.67942771
M13120	6B	26195828	0.062660635	0.391752577	99	0.029485141	0.067379068	0.04960917	29.76550221
M1602	1B	591090372	0.062702576	0.391752577	99	0.029485141	0.067366733	0.04925483	-29.55289801
M9055	4A	687327397	0.062783796	0.391752577	99	0.029485141	0.06734287	0.100346889	60.2081335
M13718	6B	0	0.062823082	0.453608247	99	0.029485141	0.06733134	0.055397057	33.23823425
M7970	3B	95564668	0.062856449	0.453608247	99	0.029485141	0.067321553	0.041594432	-24.95665907
M11746	5B	67371328	0.062893752	0.443298969	99	0.029485141	0.067310618	0.075832462	45.49947692
M10886	5B	429885968	0.062956965	0.432989691	99	0.029485141	0.067292104	0.055514848	-33.30890897
M8406	3D	305622118	0.063008728	0.298969072	99	0.029485141	0.067276958	0.04203182	25.21909199
M8994	4A	637896815	0.063047923	0.278350515	99	0.029485141	0.067265499	0.048496536	-29.09792148
M428	1A	514770962	0.063115108	0.402061856	99	0.029485141	0.067245875	0.05817261	-34.90356574
M12648	6A	592875661	0.063211614	0.412371134	99	0.029485141	0.067217726	0.047433186	28.45991161
M10474	5A	493407148	0.063286822	0.092783505	99	0.029485141	0.067195821	0.065105859	-39.06351528
M10859	5B	398970101	0.063295311	0.340206186	99	0.029485141	0.06719335	0.17789777	106.7386622
M7128	3B	7607466	0.063295311	0.340206186	99	0.029485141	0.06719335	0.17789777	106.7386622
M11575	5B	4511373	0.063327996	0.484536082	99	0.029485141	0.067183841	0.061208667	-36.72520021
M13711	6B	464521037	0.063338885	0.092783505	99	0.029485141	0.067180673	0.07942781	47.65668628
M15158	7B	641779	0.063417276	0.010309278	99	0.029485141	0.067157892	0.185306346	111.1838078
M6326	3A	168438608	0.063417276	0.010309278	99	0.029485141	0.067157892	0.185306346	111.1838078
M5937	2D	747238713	0.063422458	0.237113402	99	0.029485141	0.067156387	0.057575429	-34.54525713
M2257	1D	471927480	0.063517331	0.453608247	99	0.029485141	0.067128859	0.071510457	42.90627442
M9006	4A	668285271	0.063558596	0.206185567	99	0.029485141	0.0671169	0.054698164	32.81889815
M3840	2B	103576566	0.063606573	0.402061856	99	0.029485141	0.067103006	0.052375167	31.42510048
M12582	6A	525799703	0.063647338	0.350515464	99	0.029485141	0.067091209	0.046601951	27.96117077
M7958	3B	761436458	0.063692451	0.371134021	99	0.029485141	0.067078164	0.056859857	-34.11591429
M11421	5B	440938538	0.063743425	0.484536082	99	0.029485141	0.067063436	0.058344368	35.00662065
M9814	4D	507006414	0.063835655	0.319587629	99	0.029485141	0.06703682	0.041993294	25.19597665
M14078	6D	0	0.063853535	0.443298969	99	0.029485141	0.067031665	0.045857522	-27.51451337
M4690	2B	713880693	0.063907616	0.319587629	99	0.029485141	0.067016082	0.04728216	28.36929576
M9372	4A	450189692	0.0639802	0.020618557	99	0.029485141	0.06699519	0.128730749	77.2384494
M9760	4D	300724319	0.064121676	0.494845361	99	0.029485141	0.066954544	0.048044084	28.82645056
M9717	4D	3356525	0.064470682	0.371134021	99	0.029485141	0.066854688	0.054895482	32.93728935
M1826	1B	0	0.064532304	0.360824742	99	0.029485141	0.066837118	0.04546226	27.2773559
M929	1B	101527533	0.064542673	0.371134021	99	0.029485141	0.066834163	0.117644224	-70.58653436
M1060	1B	35143791	0.064671258	0.309278351	99	0.029485141	0.066797565	0.050426569	30.25594117
M394	1A	623753947	0.064808371	0.257731959	99	0.029485141	0.066758626	0.057464103	34.47846185
M14674	7A	181697421	0.064828646	0.402061856	99	0.029485141	0.066752876	0.062104671	-37.26280257
M310	1A	362317345	0.06483505	0.195876289	99	0.029485141	0.06675106	0.060912201	-36.54732053
M6553	3A	648497655	0.064848839	0.432989691	99	0.029485141	0.066747151	0.03874113	23.24467781
M9722	4D	1206063	0.06485105	0.175257732	99	0.029485141	0.066746525	0.058173941	-34.90436433
M7862	3B	24460849	0.064907759	0.082474227	99	0.029485141	0.066730457	0.066848816	40.10928939
M11819	5B	212365503	0.064952977	0.175257732	99	0.029485141	0.066717657	0.055080699	-33.04841939
M3251	2A	759751315	0.065060142	0.412371134	99	0.029485141	0.066687359	0.054239001	32.54340065
M1535	1B	572148431	0.065064981	0.051546392	99	0.029485141	0.066685992	0.084768307	50.86098436
M11229	5B	528891865	0.065110315	0.381443299	99	0.029485141	0.066673192	0.048929342	29.3576051
M9805	4D	250840711	0.065145427	0.484536082	99	0.029485141	0.066663286	0.056195545	33.71732717
M3133	2A	633678135	0.065158752	0.329896907	99	0.029485141	0.066659527	0.075925734	45.55544031
M4784	2B	733180507	0.065276486	0.412371134	99	0.029485141	0.066626358	0.058961266	-35.37675963
M1603	1B	721298541	0.06528334	0.329896907	99	0.029485141	0.066624429	0.043757622	-26.25457322
M11791	5B	656472011	0.065287469	0.309278351	99	0.029485141	0.066623268	0.058282255	-34.96935286
M5087	2B	770053999	0.06537056	0.340206186	99	0.029485141	0.066599901	0.049302476	-29.58148567
M7854	3B	302427239	0.065383004	0.072164948	99	0.029485141	0.066596405	0.075660654	45.39639228
M3738	2B	44609696	0.065502801	0.443298969	99	0.029485141	0.066562781	0.062973435	37.78406084
M7601	3B	526124202	0.065606919	0.381443299	99	0.029485141	0.066533611	0.083979562	50.3877373
M8237	3B	825858454	0.065670585	0.329896907	99	0.029485141	0.0665158	0.047206936	28.32416158
M10717	5B	75319717	0.065777409	0.360824742	99	0.029485141	0.066485956	0.085331548	-51.19892874
M6739	3A	714415122	0.065879578	0.432989691	99	0.029485141	0.066457462	0.061501549	-36.90092966
M7893	3B	211212780	0.065883862	0.298969072	99	0.029485141	0.066456268	0.08503434	51.02060418
M5982	2D	642441495	0.06595791	0.453608247	99	0.029485141	0.066435648	0.072082325	-43.24939504
M7057	3B	17785833	0.066056741	0.298969072	99	0.029485141	0.066408166	0.047517483	28.51048976
M12702	6A	277848418	0.066076328	0.340206186	99	0.029485141	0.066402725	0.046092966	-27.65577954
M11935	5D	472425065	0.066156478	0.340206186	99	0.029485141	0.066380477	0.086109922	-51.66595335
M8389	3D	352107905	0.066175359	0.463917526	99	0.029485141	0.066375241	0.046662901	27.99774058
M15430	7B	535456944	0.066177911	0.020618557	99	0.029485141	0.066374533	0.147832893	88.69973553
M15384	7B	451187047	0.066177911	0.020618557	99	0.029485141	0.066374533	0.147832893	-88.69973553
M2140	1D	688816452	0.066177911	0.020618557	99	0.029485141	0.066374533	0.147832893	-88.69973553
M3338	2A	15333544	0.066257316	0.381443299	99	0.029485141	0.066352529	0.052848147	-31.70888812
M4378	2B	649670177	0.066312983	0.206185567	99	0.029485141	0.06633712	0.054335915	32.60154895
M3310	2A	765401712	0.06644504	0.412371134	99	0.029485141	0.066300622	0.043901518	-26.34091108
M1629	1B	588295288	0.066506888	0.329896907	99	0.029485141	0.066283556	0.04177079	-25.06247381
M5774	2D	0	0.066560886	0.494845361	99	0.029485141	0.06626867	0.059284662	-35.57079708
M3844	2B	136811320	0.066578971	0.402061856	99	0.029485141	0.066263687	0.063206666	-37.92399966
M6144	3A	20335431	0.066676691	0.257731959	99	0.029485141	0.066236789	0.043902935	-26.3417608
M3688	2B	38782061	0.066818118	0.226804124	99	0.029485141	0.066197935	0.049398265	-29.63895891
M590	1A	564125239	0.066907667	0.072164948	99	0.029485141	0.06617338	0.077242101	46.34526082
M11163	5B	519005204	0.066983574	0.350515464	99	0.029485141	0.066152594	0.050949599	-30.56975923
M11581	5B	584614254	0.067136436	0.463917526	99	0.029485141	0.066110812	0.057817208	34.69032485
M2319	2A	12327255	0.067213241	0.195876289	99	0.029485141	0.066089858	0.073839671	44.30380282
M9324	4A	0	0.067241071	0.463917526	99	0.029485141	0.066082272	0.051295352	30.77721139
M13287	6B	230607608	0.067322801	0.432989691	99	0.029485141	0.066060012	0.046857134	-28.11428042
M4621	2B	665938471	0.067398489	0.453608247	99	0.029485141	0.066039425	0.046421468	27.85288055
M10007	5A	393257332	0.067399	0.402061856	99	0.029485141	0.066039286	0.040893826	24.53629545
M14276	7A	13189977	0.06740341	0.443298969	99	0.029485141	0.066038087	0.061876264	37.12575863
M10894	5B	370732351	0.067594016	0.195876289	99	0.029485141	0.065986357	0.062985473	-37.79128404
M9941	5A	52738363	0.067661486	0.484536082	99	0.029485141	0.065968083	0.048924449	-29.35466943
M4803	2B	127668612	0.067671641	0.18556701	99	0.029485141	0.065965335	0.049219791	29.53187434
M911	1B	137436650	0.067807116	0.350515464	99	0.029485141	0.065928709	0.144636082	86.78164906
M803	1B	19233594	0.067807116	0.350515464	99	0.029485141	0.065928709	0.144636082	-86.78164906
M14164	7A	3010352	0.06789767	0.484536082	99	0.029485141	0.065904272	0.05191806	31.15083608
M11373	5B	620654423	0.067933021	0.082474227	99	0.029485141	0.065894741	0.066611092	39.96665496
M13816	6B	0	0.068050401	0.237113402	99	0.029485141	0.065863136	0.053101216	31.86072959
M4332	2B	410189157	0.068162289	0.371134021	99	0.029485141	0.065833064	0.043547085	26.12825104
M9734	4D	16502547	0.068168756	0.24742268	99	0.029485141	0.065831327	0.071832839	43.09970363
M3105	2A	744494210	0.068230019	0.463917526	99	0.029485141	0.065814886	0.051018598	-30.61115852
M9538	4B	529563926	0.068288379	0.443298969	99	0.029485141	0.065799239	0.062435006	37.46100385
M1231	1B	86102631	0.068291106	0.288659794	99	0.029485141	0.065798508	0.044507135	26.70428125
M13213	6B	141656076	0.068335282	0.463917526	99	0.029485141	0.065786674	0.053955855	32.37351292
M409	1A	501031648	0.068347898	0.494845361	99	0.029485141	0.065783296	0.053637224	-32.18233418
M13571	6B	561062316	0.068410775	0.371134021	99	0.029485141	0.06576647	0.051169808	30.70188458
M14243	7A	600721014	0.068524026	0.113402062	99	0.029485141	0.065736206	0.068555595	-41.13335705
M1330	1B	505061911	0.068555042	0.257731959	99	0.029485141	0.065727928	0.050444273	30.26656382
M1920	1B	329496238	0.068565124	0.319587629	99	0.029485141	0.065725237	0.166845228	100.1071371
M8990	4A	635530051	0.068739502	0.402061856	99	0.029485141	0.065678776	0.085690873	-51.41452381
M1252	1B	452765176	0.06884373	0.453608247	99	0.029485141	0.065651066	0.045634745	27.38084715
M13434	6B	594864513	0.068931372	0.237113402	99	0.029485141	0.065627801	0.043637093	26.18225604
M4813	2B	602108234	0.068983179	0.484536082	99	0.029485141	0.065614064	0.052133718	-31.28023058
M14894	7A	694675632	0.069068698	0.268041237	99	0.029485141	0.065591412	0.054229433	-32.53765978
M1539	1B	571445284	0.069102215	0.484536082	99	0.029485141	0.065582543	0.056931973	34.15918407
M4857	2B	748574967	0.069207104	0.340206186	99	0.029485141	0.065554816	0.063170226	37.9021355
M6880	3A	757610977	0.069211925	0.278350515	99	0.029485141	0.065553543	0.064205174	-38.52310419
M13793	6B	467011945	0.069274461	0.24742268	99	0.029485141	0.065537036	0.046097436	27.65846159
M1263	1B	418051065	0.069376675	0.350515464	99	0.029485141	0.065510089	0.054868265	-32.92095917
M13928	6D	14510861	0.069377171	0.360824742	99	0.029485141	0.065509958	0.054012171	-32.40730243
M1108	1B	403186540	0.069398862	0.051546392	99	0.029485141	0.065504246	0.087203755	-52.32225278
M1035	1B	46096564	0.069557392	0.443298969	99	0.029485141	0.065462552	0.066428034	39.85682032
M8499	3D	613900663	0.069611742	0.484536082	99	0.029485141	0.065448282	0.064551461	38.73087666
M3253	2A	759751315	0.069703379	0.391752577	99	0.029485141	0.065424249	0.057268874	-34.36132431
M15442	7B	238950412	0.069711641	0.298969072	99	0.029485141	0.065422084	0.040124611	-24.07476676
M3644	2B	50713994	0.06972162	0.288659794	99	0.029485141	0.06541947	0.043038292	25.82297524
M9386	4A	739304166	0.069825998	0.371134021	99	0.029485141	0.065392145	0.052324145	31.39448688
M13407	6B	512060987	0.069979074	0.453608247	99	0.029485141	0.065352152	0.055449888	33.26993252
M4334	2B	477569126	0.070006272	0.494845361	99	0.029485141	0.065345057	0.046489155	27.89349277
M9612	4B	627811268	0.070020369	0.257731959	99	0.029485141	0.06534138	0.046636612	27.98196699
M14783	7A	606564392	0.070067726	0.298969072	99	0.029485141	0.065329035	0.048009005	-28.80540302
M11637	5B	598146738	0.070120498	0.309278351	99	0.029485141	0.065315288	0.07464003	-44.78401808
M1800	1B	746101578	0.070204651	0.360824742	99	0.029485141	0.065293391	0.041598884	-24.95933069
M12778	6A	251320214	0.070245225	0.309278351	99	0.029485141	0.065282844	0.054226756	-32.53605386
M9958	5A	74419583	0.07028941	0.164948454	99	0.029485141	0.065271365	0.05509734	33.05840419
M645	1A	584104138	0.070341619	0.340206186	99	0.029485141	0.065257813	0.037930555	22.75833286
M10845	5B	395681464	0.070353477	0.082474227	99	0.029485141	0.065254736	0.067125594	40.27535644
M3681	2B	628972455	0.07043296	0.422680412	99	0.029485141	0.065234128	0.071740207	-43.04412443
M1707	1B	580578970	0.070491914	0.24742268	99	0.029485141	0.065218859	0.044081361	-26.44881666
M4398	2B	575867441	0.070607783	0.288659794	99	0.029485141	0.065188889	0.045792185	27.47531115
M6180	3A	353247178	0.070702926	0.391752577	99	0.029485141	0.06516432	0.065340223	39.20413362
M11150	5B	421995258	0.070750888	0.371134021	99	0.029485141	0.065151949	0.058217194	-34.9303161
M1176	1B	86948109	0.070779273	0.030927835	99	0.029485141	0.065144631	0.103513167	-62.10789996
M3637	2B	306113161	0.070811353	0.164948454	99	0.029485141	0.065136365	0.049963227	-29.97793609
M477	1A	540665432	0.070823766	0.402061856	99	0.029485141	0.065133168	0.044280854	26.56851242
M9403	4A	0	0.070961822	0.319587629	99	0.029485141	0.065097648	0.039966226	-23.97973569
M3355	2A	764231381	0.070991086	0.402061856	99	0.029485141	0.065090128	0.049206559	-29.52393522
M15034	7A	0	0.071144979	0.268041237	99	0.029485141	0.06505064	0.044339714	26.60382862
M15144	7A	113229613	0.071148367	0.12371134	99	0.029485141	0.065049771	0.056329124	33.79747457
M6909	3B	4228801	0.071150875	0.371134021	99	0.029485141	0.065049129	0.041484324	-24.89059446
M12966	6B	643613	0.071169228	0.391752577	99	0.029485141	0.065044426	0.043226957	-25.93617449
M503	1A	451630421	0.071188131	0.463917526	99	0.029485141	0.065039584	0.055096947	33.05816803
M14590	7A	92419577	0.071216782	0.360824742	99	0.029485141	0.065032247	0.0404173	-24.25038011
M5350	2B	797277976	0.071306788	0.134020619	99	0.029485141	0.06500922	0.058075293	-34.84517609
M4579	2B	0	0.071382248	0.134020619	99	0.029485141	0.064989939	0.054075478	-32.44528691
M11691	5B	634442505	0.071514063	0.453608247	99	0.029485141	0.064956312	0.056082682	-33.64960923
M9929	5A	81414626	0.07168687	0.371134021	99	0.029485141	0.06491233	0.038251431	-22.95085843
M13723	6B	462318879	0.071797613	0.391752577	99	0.029485141	0.064884205	0.051734329	-31.04059739
M5940	2D	620909947	0.071836658	0.278350515	99	0.029485141	0.064874299	0.041785884	25.07153017
M7630	3B	579446373	0.071878366	0.051546392	99	0.029485141	0.064863726	0.080639063	-48.38343803
M10960	5B	554187001	0.07193257	0.443298969	99	0.029485141	0.064849994	0.069795233	41.87714
M15354	7B	364043435	0.072072134	0.092783505	99	0.029485141	0.064814688	0.067125153	40.275092
M13636	6B	696019501	0.072106982	0.12371134	99	0.029485141	0.064805884	0.063064582	37.83874901
M1968	1D	436889059	0.07235527	0.371134021	99	0.029485141	0.064743292	0.049514384	29.70863063
M10401	5A	582094327	0.072387157	0.474226804	99	0.029485141	0.06473527	0.045440653	27.26439158
M4099	2B	419320938	0.07241987	0.350515464	99	0.029485141	0.064727045	0.122588816	-73.55328949
M11016	5B	485806429	0.07242129	0.134020619	99	0.029485141	0.064726688	0.059173224	-35.50393465
M14555	7A	80567712	0.072498082	0.319587629	99	0.029485141	0.064707396	0.070128784	42.07727049
M11489	5B	550320578	0.072620026	0.463917526	99	0.029485141	0.064676806	0.049608064	-29.76483835
M1013	1B	4821459	0.072623573	0.329896907	99	0.029485141	0.064675917	0.12577097	-75.46258196
M4614	2B	91473909	0.072702221	0.494845361	99	0.029485141	0.064656218	0.048637019	-29.18221128
M825	1B	28701051	0.072724848	0.474226804	99	0.029485141	0.064650556	0.049813382	-29.88802913
M6877	3A	613741323	0.072738355	0.175257732	99	0.029485141	0.064647176	0.056035035	-33.62102106
M11128	5B	515039938	0.072774796	0.381443299	99	0.029485141	0.064638062	0.048677039	-29.20622335
M5089	2B	770053999	0.072834636	0.288659794	99	0.029485141	0.064623106	0.05218573	31.31143776
M529	1A	534768642	0.073011762	0.443298969	99	0.029485141	0.064578915	0.048850118	29.31007069
M1379	1B	444421058	0.073019161	0.350515464	99	0.029485141	0.064577072	0.043952138	26.37128261
M3482	2B	12913977	0.073031849	0.278350515	99	0.029485141	0.064573912	0.048619501	29.17170075
M202	1A	52532558	0.073084079	0.484536082	99	0.029485141	0.064560907	0.041942759	25.16565566
M5031	2B	562205678	0.073099407	0.484536082	99	0.029485141	0.064557093	0.042858229	25.71493737
M8775	4A	584388334	0.073110557	0.082474227	99	0.029485141	0.064554318	0.065040607	39.02436426
M5985	2D	775734045	0.073165077	0.226804124	99	0.029485141	0.06454076	0.05458084	32.74850401
M11816	5B	0	0.073205164	0.144329897	99	0.029485141	0.064530798	0.061276403	-36.76584169
M13922	6D	13970663	0.073269591	0.371134021	99	0.029485141	0.064514799	0.054258879	32.55532747
M7499	3B	248342512	0.073280833	0.154639175	99	0.029485141	0.064512009	0.050933115	30.5598692
M15145	7A	113229613	0.073372607	0.092783505	99	0.029485141	0.06448925	0.062417371	37.45042236
M11053	5B	433701292	0.073551607	0.453608247	99	0.029485141	0.06444495	0.068568638	41.14118298
M13821	6B	0	0.073623521	0.381443299	99	0.029485141	0.064427185	0.05172326	-31.03395603
M15152	7A	711324304	0.073679309	0.484536082	99	0.029485141	0.064413416	0.049423929	29.65435758
M2028	1D	18619415	0.07382437	0.443298969	99	0.029485141	0.064377669	0.042105236	25.26314151
M12305	6A	0	0.073836887	0.134020619	99	0.029485141	0.064374588	0.055723385	33.43403106
M7737	3B	0	0.073860728	0.494845361	99	0.029485141	0.064368722	0.037092298	-22.25537866
M3391	2A	588736134	0.073968923	0.443298969	99	0.029485141	0.064342123	0.062989453	37.79367173
M14800	7A	580656999	0.073979366	0.381443299	99	0.029485141	0.064339558	0.048623053	29.17383162
M8324	3D	32335084	0.074001098	0.329896907	99	0.029485141	0.064334222	0.045635062	-27.38103733
M8371	3D	68880824	0.074097746	0.175257732	99	0.029485141	0.064310509	0.052893267	-31.73596035
M1103	1B	262341897	0.074098493	0.298969072	99	0.029485141	0.064310326	0.085587674	-51.35260449
M1352	1B	378833974	0.074107411	0.226804124	99	0.029485141	0.06430814	0.044662864	26.79771833
M5987	2D	786225684	0.074117393	0.195876289	99	0.029485141	0.064305693	0.055425234	33.25514051
M9975	5A	593667669	0.074147161	0.257731959	99	0.029485141	0.064298399	0.043545163	26.12709774
M2709	2A	563950254	0.0741661	0.288659794	99	0.029485141	0.064293759	0.053503218	32.10193089
M5102	2B	0	0.074167623	0.06185567	99	0.029485141	0.064293386	0.074470808	44.68248496
M2130	1D	244297621	0.074302723	0.329896907	99	0.029485141	0.06426033	0.12435922	74.6155318
M9843	5A	6448975	0.074347579	0.329896907	99	0.029485141	0.064249369	0.053323084	-31.99385066
M15048	7A	714340795	0.074405271	0.422680412	99	0.029485141	0.064235283	0.040325421	-24.19525287
M14096	6D	462636212	0.074606477	0.12371134	99	0.029485141	0.064186247	0.056255248	-33.75314907
M10056	5A	473024901	0.07463282	0.350515464	99	0.029485141	0.064179838	0.048258327	-28.95499626
M5516	2D	139037649	0.074654656	0.041237113	99	0.029485141	0.064174527	0.087091452	52.25487142
M11284	5B	416596843	0.074668528	0.360824742	99	0.029485141	0.064171154	0.049615059	-29.76903569
M7260	3B	47019723	0.074909485	0.432989691	99	0.029485141	0.064112674	0.048156626	28.89397539
M9019	4A	231448891	0.075119267	0.072164948	99	0.029485141	0.064061927	0.082337147	-49.40228844
M11571	5B	583744955	0.0754346	0.443298969	99	0.029485141	0.063985937	0.050777051	-30.46623072
M9452	4B	13088435	0.075562674	0.195876289	99	0.029485141	0.063955173	0.056206414	33.72384829
M2358	2A	15637364	0.075613499	0.144329897	99	0.029485141	0.06394298	0.080934779	48.56086768
M4566	2B	692625689	0.075657004	0.494845361	99	0.029485141	0.06393255	0.049717198	29.83031857
M14521	7A	56203202	0.075667514	0.474226804	99	0.029485141	0.063930032	0.051050161	30.63009665
M14203	7A	13966199	0.075683081	0.319587629	99	0.029485141	0.063926302	0.051185766	30.71145947
M14747	7A	538052365	0.075712695	0.443298969	99	0.029485141	0.063919209	0.05740831	-34.44498611
M14523	7A	57712321	0.076027826	0.360824742	99	0.029485141	0.063843917	0.047092874	-28.2557247
M1220	1B	2308496	0.076075519	0.113402062	99	0.029485141	0.063832552	0.075696494	-45.41789668
M6686	3A	711115907	0.076134785	0.072164948	99	0.029485141	0.063818439	0.068415634	41.04938056
M7226	3B	42052554	0.076248318	0.051546392	99	0.029485141	0.063791439	0.07970336	-47.82201607
M4923	2B	679742409	0.076351288	0.360824742	99	0.029485141	0.063766988	0.051551788	-30.93107259
M8478	3D	132061276	0.076366416	0.030927835	99	0.029485141	0.063763399	0.099335523	59.6013136
M14727	7A	495536855	0.076380513	0.216494845	99	0.029485141	0.063760055	0.049372905	29.62374301
M6527	3A	639700048	0.076382243	0.144329897	99	0.029485141	0.063759645	0.063572935	-38.14376106
M3569	2B	31382129	0.076394968	0.391752577	99	0.029485141	0.063756627	0.076475747	45.88544801
M14725	7A	247251421	0.076460983	0.422680412	99	0.029485141	0.06374098	0.038330946	-22.99856748
M9106	4A	694752853	0.076480788	0.237113402	99	0.029485141	0.063736289	0.047172692	28.3036152
M6210	3A	577683980	0.076545097	0.082474227	99	0.029485141	0.063721065	0.063377193	-38.02631569
M14097	6D	461702450	0.076846299	0.020618557	99	0.029485141	0.063649948	0.124681691	74.80901489
M14162	7A	150861541	0.076846299	0.020618557	99	0.029485141	0.063649948	0.124681691	74.80901489
M4322	2B	691821263	0.076863242	0.463917526	99	0.029485141	0.063645956	0.050112507	30.06750399
M4583	2B	710353117	0.076885942	0.402061856	99	0.029485141	0.06364061	0.046459038	-27.87542309
M1766	1B	638015288	0.076924133	0.020618557	99	0.029485141	0.06363162	0.123157242	73.89434491
M336	1A	426440396	0.076924133	0.020618557	99	0.029485141	0.06363162	0.123157242	73.89434491
M885	1B	0	0.077114335	0.350515464	99	0.029485141	0.063586917	0.045533611	-27.32016631
M3815	2B	105985751	0.07712008	0.391752577	99	0.029485141	0.063585568	0.077379804	46.42788235
M15449	7B	584025901	0.077219957	0.144329897	99	0.029485141	0.063562145	0.055880022	-33.52801344
M580	1A	565296725	0.077246518	0.030927835	99	0.029485141	0.063555921	0.100514535	60.30872125
M8575	4A	46412568	0.077278255	0.226804124	99	0.029485141	0.063548487	0.053090237	-31.85414235
M13867	6D	360642174	0.077293245	0.350515464	99	0.029485141	0.063544978	0.051701283	31.02076992
M13809	6B	715219837	0.077299746	0.494845361	99	0.029485141	0.063543456	0.058079985	-34.84799091
M9797	4D	484271501	0.077324952	0.360824742	99	0.029485141	0.063537556	0.051136469	-30.6818815
M7627	3B	580348846	0.077414744	0.103092784	99	0.029485141	0.063516557	0.057820005	34.69200294
M10606	5B	369428012	0.07747001	0.113402062	99	0.029485141	0.063503646	0.065845087	39.50705235
M14217	7A	0	0.077506407	0.463917526	99	0.029485141	0.063495148	0.03962734	-23.77640414
M4622	2B	665938471	0.077565295	0.391752577	99	0.029485141	0.063481409	0.042837299	-25.70237921
M4028	2B	392038009	0.077641873	0.103092784	99	0.029485141	0.063463559	0.062942597	-37.76555848
M9188	4A	50555579	0.077705381	0.340206186	99	0.029485141	0.06344877	0.079704084	-47.82245025
M4789	2B	601212198	0.077775129	0.463917526	99	0.029485141	0.063432544	0.038942708	23.36562486
M1902	1B	602910762	0.077914382	0.371134021	99	0.029485141	0.063400195	0.036779854	22.06791219
M1499	1B	558561632	0.077933406	0.350515464	99	0.029485141	0.06339578	0.03884199	23.30519422
M10992	5B	580974275	0.077945657	0.103092784	99	0.029485141	0.063392938	0.067233693	-40.3402159
M7204	3B	34507090	0.077971089	0.06185567	99	0.029485141	0.06338704	0.075755639	45.45338363
M15450	7B	584025901	0.078030993	0.371134021	99	0.029485141	0.063373154	0.041486476	24.89188531
M5320	2B	799056714	0.078079286	0.06185567	99	0.029485141	0.063361969	0.100719648	60.4317888
M11140	5B	415747285	0.07812798	0.072164948	99	0.029485141	0.063350698	0.077897019	46.7382116
M14647	7A	206581742	0.078149383	0.474226804	99	0.029485141	0.063345747	0.05393556	32.3613358
M4384	2B	562850971	0.078180792	0.288659794	99	0.029485141	0.063338483	0.045615675	-27.36940479
M3015	2A	715384273	0.078186456	0.474226804	99	0.029485141	0.063337173	0.050681002	30.40860127
M1329	1B	505061911	0.078197318	0.298969072	99	0.029485141	0.063334662	0.04488617	-26.93170194
M4957	2B	761846794	0.078200543	0.216494845	99	0.029485141	0.063333917	0.055786898	33.47213851
M4403	2B	614349634	0.078254684	0.402061856	99	0.029485141	0.063321407	0.047846275	-28.70776478
M6707	3A	710298658	0.078391261	0.371134021	99	0.029485141	0.063289892	0.041268413	24.76104803
M4563	2B	692625689	0.07843477	0.484536082	99	0.029485141	0.063279865	0.056734255	34.04055295
M4266	2B	712007919	0.078539949	0.474226804	99	0.029485141	0.06325565	0.058039806	34.82388384
M10251	5A	540057606	0.078573229	0.12371134	99	0.029485141	0.063247996	0.057844744	34.70684658
M6596	3A	659038151	0.078593735	0.360824742	99	0.029485141	0.063243281	0.038879178	-23.32750687
M2298	1D	488579573	0.078729355	0.329896907	99	0.029485141	0.063212135	0.044253731	26.55223869
M10149	5A	458524672	0.078758614	0.381443299	99	0.029485141	0.063205423	0.040448689	24.26921354
M10044	5A	451877771	0.078865267	0.463917526	99	0.029485141	0.063180979	0.039023175	23.41390512
M15092	7A	721737081	0.078965107	0.484536082	99	0.029485141	0.06315813	0.066754053	-40.05243176
M4364	2B	540660555	0.079040504	0.463917526	99	0.029485141	0.063140897	0.041001606	-24.60096379
M11178	5B	0	0.079118479	0.113402062	99	0.029485141	0.063123092	0.056946642	34.16798515
M11255	5B	51060783	0.079205981	0.432989691	99	0.029485141	0.063103135	0.059416729	-35.65003768
M14267	7A	14297975	0.079271345	0.463917526	99	0.029485141	0.063088243	0.056620189	33.97211352
M11844	5B	621241019	0.079337231	0.443298969	99	0.029485141	0.063073246	0.046621413	-27.9728476
M14320	7A	0	0.079388283	0.371134021	99	0.029485141	0.063061635	0.041265758	-24.75945481
M852	1B	0	0.079389586	0.432989691	99	0.029485141	0.063061338	0.059198641	35.51918449
M6900	3B	665978534	0.079411356	0.072164948	99	0.029485141	0.06305639	0.075090708	45.05442475
M3347	2A	643435780	0.079536946	0.041237113	99	0.029485141	0.063027869	0.088883256	53.32995353
M10202	5A	514260436	0.07962142	0.195876289	99	0.029485141	0.063008713	0.053180164	-31.90809852
M12957	6B	732212	0.07966308	0.484536082	99	0.029485141	0.062999274	0.048840552	29.30433127
M9371	4A	450189692	0.079712009	0.453608247	99	0.029485141	0.062988196	0.055017722	-33.01063337
M14625	7A	116530515	0.079758892	0.268041237	99	0.029485141	0.062977587	0.044022993	26.4137958
M1084	1B	0	0.079828956	0.082474227	99	0.029485141	0.062961746	0.064083475	38.45008491
M4361	2B	521346375	0.079893745	0.206185567	99	0.029485141	0.062947111	0.049346889	-29.60813313
M8452	3D	543684499	0.079911478	0.237113402	99	0.029485141	0.062943108	0.04742307	28.45384208
M6886	3B	0	0.079973196	0.371134021	99	0.029485141	0.062929182	0.041163736	24.69824188
M3619	2B	612309756	0.080062228	0.494845361	99	0.029485141	0.062909114	0.053929989	32.35799324
M8696	4A	0	0.08011453	0.103092784	99	0.029485141	0.062897336	0.057013391	34.20803481
M7850	3B	736666462	0.080179016	0.030927835	99	0.029485141	0.062882826	0.098693856	-59.21631343
M546	1A	370367976	0.080246798	0.463917526	99	0.029485141	0.062867589	0.049153912	-29.49234722
M2054	1D	41915193	0.080333106	0.206185567	99	0.029485141	0.062848207	0.058178533	-34.90712005
M9959	5A	54941693	0.080362453	0.453608247	99	0.029485141	0.062841622	0.047100968	28.2605809
M3505	2B	24887527	0.080397678	0.422680412	99	0.029485141	0.062833721	0.04353518	26.12110798
M956	1B	630186255	0.080441476	0.175257732	99	0.029485141	0.062823903	0.059274557	35.56473403
M3620	2B	612309756	0.080471753	0.216494845	99	0.029485141	0.06281712	0.048556657	29.13399421
M6587	3A	496490823	0.080511794	0.432989691	99	0.029485141	0.062808153	0.040849593	-24.50975608
M712	1B	2496086	0.080583478	0.453608247	99	0.029485141	0.062792111	0.057210135	34.32608124
M15142	7A	734931841	0.080644954	0.443298969	99	0.029485141	0.062778367	0.056999798	-34.19987853
M14726	7A	247251421	0.080671847	0.443298969	99	0.029485141	0.062772358	0.036232822	-21.739693
M5805	2D	0	0.080704231	0.484536082	99	0.029485141	0.062765125	0.04709423	28.25653786
M9442	4B	1774223	0.08076303	0.319587629	99	0.029485141	0.062752	0.048448761	-29.06925649
M5867	2D	601604653	0.080781985	0.072164948	99	0.029485141	0.062747771	0.085779695	51.46781686
M8195	3B	819037462	0.080818665	0.319587629	99	0.029485141	0.062739591	0.047048056	-28.22883369
M139	1A	22588813	0.080843782	0.422680412	99	0.029485141	0.062733992	0.040446984	-24.26819036
M14618	7A	116622717	0.080872729	0.463917526	99	0.029485141	0.062727542	0.050800228	30.48013661
M10066	5A	437916983	0.081045962	0.082474227	99	0.029485141	0.062688992	0.067669682	-40.60180941
M7555	3B	495235808	0.08105045	0.309278351	99	0.029485141	0.062687995	0.053452289	32.07137346
M1501	1B	558913560	0.081266163	0.329896907	99	0.029485141	0.062640121	0.04326693	25.96015798
M13655	6B	700666990	0.081288178	0.422680412	99	0.029485141	0.062635243	0.051146867	30.68812045
M3055	2A	728790463	0.081424827	0.216494845	99	0.029485141	0.062604997	0.048184602	28.91076108
M8956	4A	648906704	0.081428566	0.082474227	99	0.029485141	0.06260417	0.062413321	-37.4479928
M6836	3A	33345150	0.081430686	0.051546392	99	0.029485141	0.062603702	0.078219803	46.93188194
M14845	7A	679967840	0.081567738	0.144329897	99	0.029485141	0.062573425	0.054625219	32.77513138
M6023	3A	1286118	0.08158045	0.164948454	99	0.029485141	0.062570619	0.054032645	32.41958725
M6111	3A	30196842	0.08169839	0.463917526	99	0.029485141	0.062544614	0.045028317	-27.01699007
M7039	3B	17613543	0.081725551	0.206185567	99	0.029485141	0.062538631	0.051714607	-31.02876397
M8388	3D	184366461	0.081758706	0.226804124	99	0.029485141	0.06253133	0.05153856	-30.92313591
M7594	3B	22083131	0.081801761	0.319587629	99	0.029485141	0.062521855	0.05150402	30.90241176
M12733	6A	594854466	0.081831191	0.494845361	99	0.029485141	0.062515381	0.047876208	28.72572495
M6860	3A	61704762	0.08194174	0.082474227	99	0.029485141	0.062491086	0.064068725	-38.44123481
M9830	5A	2726256	0.082088205	0.309278351	99	0.029485141	0.062458952	0.04403383	26.42029826
M15557	7B	642499302	0.082125244	0.474226804	99	0.029485141	0.062450837	0.045169039	-27.10142357
M10908	5B	369307760	0.082196791	0.288659794	99	0.029485141	0.06243517	0.043086489	-25.85189344
M3212	2A	759463295	0.082245261	0.082474227	99	0.029485141	0.062424566	0.062521998	37.51319854
M15073	7A	621203584	0.082302948	0.484536082	99	0.029485141	0.062411954	0.0598651	-35.91906018
M14876	7A	590930934	0.082322699	0.257731959	99	0.029485141	0.062407638	0.050815997	30.48959824
M1686	1B	454457751	0.082760453	0.494845361	99	0.029485141	0.06231227	0.038878553	-23.32713157
M944	1B	63461211	0.082771941	0.402061856	99	0.029485141	0.062309775	0.053079253	31.84755151
M12012	5D	552080511	0.082867683	0.24742268	99	0.029485141	0.062288994	0.042831618	-25.69897076
M14501	7A	62750954	0.083204521	0.216494845	99	0.029485141	0.062216092	0.044770535	26.86232104
M689	1A	592499382	0.083208853	0.216494845	99	0.029485141	0.062215157	0.051541829	-30.92509733
M13823	6B	0	0.083234795	0.154639175	99	0.029485141	0.062209556	0.049093843	29.45630566
M2965	2A	705340913	0.083379017	0.24742268	99	0.029485141	0.062178453	0.051414884	-30.8489301
M5367	2D	14379312	0.083438766	0.391752577	99	0.029485141	0.062165585	0.097870599	58.7223594
M5239	2B	31519188	0.083438766	0.391752577	99	0.029485141	0.062165585	0.097870599	-58.7223594
M5266	2B	31477695	0.083438766	0.391752577	99	0.029485141	0.062165585	0.097870599	-58.7223594
M5326	2B	644096629	0.083438766	0.391752577	99	0.029485141	0.062165585	0.097870599	-58.7223594
M14123	6D	473287213	0.083596891	0.350515464	99	0.029485141	0.062131578	0.117987499	70.7924995
M11225	5B	34050805	0.083770923	0.453608247	99	0.029485141	0.062094233	0.042030172	25.21810348
M2760	2A	437977326	0.083908948	0.206185567	99	0.029485141	0.062064674	0.065034165	-39.02049898
M8788	4A	599469214	0.083925486	0.381443299	99	0.029485141	0.062061136	0.042876572	-25.72594333
M12556	6A	39131835	0.083938468	0.422680412	99	0.029485141	0.062058359	0.055074747	33.04484839
M11930	5D	391278717	0.083989966	0.381443299	99	0.029485141	0.062047349	0.047695383	-28.61722955
M4950	2B	753792974	0.084008168	0.12371134	99	0.029485141	0.062043459	0.060670917	36.40255
M888	1B	0	0.084012644	0.319587629	99	0.029485141	0.062042502	0.058407947	35.0447681
M12169	6A	94375972	0.084082149	0.350515464	99	0.029485141	0.062027658	0.127241756	76.34505381
M12167	6A	208629062	0.084082149	0.350515464	99	0.029485141	0.062027658	0.127241756	-76.34505381
M12303	6A	16598099	0.084082149	0.350515464	99	0.029485141	0.062027658	0.127241756	-76.34505381
M12317	6A	17587956	0.084082149	0.350515464	99	0.029485141	0.062027658	0.127241756	-76.34505381
M14649	7A	159707853	0.084149853	0.288659794	99	0.029485141	0.062013211	0.045787192	-27.47231514
M15585	7B	0	0.084156816	0.484536082	99	0.029485141	0.062011726	0.057111666	34.26699989
M6072	3A	12868494	0.08421839	0.24742268	99	0.029485141	0.0619986	0.039580418	-23.74825067
M13084	6B	14484152	0.084226997	0.494845361	99	0.029485141	0.061996766	0.052488443	31.49306584
M6614	3A	681466014	0.084272594	0.051546392	99	0.029485141	0.061987053	0.079775305	47.86518278
M9965	5A	380823807	0.084302829	0.175257732	99	0.029485141	0.061980616	0.051292841	30.77570483
M13998	6D	134699294	0.084355503	0.309278351	99	0.029485141	0.061969408	0.05573361	-33.44016587
M3527	2B	27010782	0.084440451	0.463917526	99	0.029485141	0.061951348	0.044428357	-26.65701405
M3664	2B	59764104	0.084503555	0.051546392	99	0.029485141	0.061937945	0.086364574	51.81874434
M985	1B	60359807	0.084724588	0.360824742	99	0.029485141	0.061891086	0.111945594	-67.16735648
M11608	5B	587341324	0.08474239	0.195876289	99	0.029485141	0.061887318	0.048592091	-29.15525456
M5050	2B	442156608	0.084752672	0.402061856	99	0.029485141	0.061885142	0.051041876	30.62512588
M14388	7A	702331405	0.08476605	0.381443299	99	0.029485141	0.061882311	0.079995919	-47.99755152
M14394	7A	29138301	0.08476605	0.381443299	99	0.029485141	0.061882311	0.079995919	-47.99755152
M11137	5B	44882805	0.084785061	0.082474227	99	0.029485141	0.061878289	0.063754324	38.25259443
M15580	7B	647131014	0.084798609	0.06185567	99	0.029485141	0.061875424	0.071635521	42.98131239
M433	1A	585075445	0.084803245	0.432989691	99	0.029485141	0.061874443	0.052825329	-31.69519765
M1537	1B	568960943	0.084805671	0.391752577	99	0.029485141	0.06187393	0.040010219	24.00613136
M11836	5B	0	0.085067785	0.257731959	99	0.029485141	0.061818594	0.057519652	34.51179099
M55	1A	1673825	0.085148797	0.371134021	99	0.029485141	0.061801529	0.038596679	23.15800736
M10349	5A	513747718	0.085228776	0.494845361	99	0.029485141	0.061784699	0.052800645	31.68038724
M11107	5B	428715228	0.085272633	0.371134021	99	0.029485141	0.061775477	0.048579097	29.14745792
M10564	5B	11085155	0.08531782	0.309278351	99	0.029485141	0.061765982	0.119641837	-71.7851023
M8491	3D	115087655	0.085342463	0.237113402	99	0.029485141	0.061760805	0.048532623	29.11957401
M5057	2B	764073687	0.08541265	0.278350515	99	0.029485141	0.061746072	0.04979736	-29.87841584
M11027	5B	492256866	0.085419819	0.329896907	99	0.029485141	0.061744568	0.04474447	26.84668193
M1867	1B	478156609	0.08572234	0.268041237	99	0.029485141	0.061681221	0.041573965	24.94437901
M15417	7B	538125772	0.085783415	0.371134021	99	0.029485141	0.061668462	0.04694671	28.16802575
M9295	4A	312603570	0.085848048	0.474226804	99	0.029485141	0.061654971	0.035438065	21.26283893
M3915	2B	65243708	0.085914787	0.041237113	99	0.029485141	0.061641051	0.08453725	50.72235029
M14885	7A	674740734	0.086057895	0.206185567	99	0.029485141	0.061611244	0.05357676	-32.14605593
M3635	2B	504867107	0.086096153	0.360824742	99	0.029485141	0.061603285	0.104428067	-62.65684002
M11296	5B	223737266	0.086134603	0.195876289	99	0.029485141	0.06159529	0.049211006	-29.52660336
M3980	2B	218209754	0.086510325	0.360824742	99	0.029485141	0.061517368	0.049423575	29.65414491
M12442	6A	67377724	0.086533807	0.422680412	99	0.029485141	0.061512511	0.0462457	27.74741991
M2829	2A	579584012	0.086551676	0.319587629	99	0.029485141	0.061508815	0.040339661	24.20379645
M14262	7A	0	0.086556015	0.113402062	99	0.029485141	0.061507918	0.057809765	34.6858589
M4401	2B	565074839	0.086574481	0.195876289	99	0.029485141	0.0615041	0.048830921	29.29855239
M1066	1B	121061272	0.086631602	0.443298969	99	0.029485141	0.061492296	0.044216674	26.53000432
M1859	1B	478429415	0.086762513	0.329896907	99	0.029485141	0.061465275	0.042125404	-25.27524227
M184	1A	41368065	0.086935384	0.288659794	99	0.029485141	0.061429662	0.05166844	31.00106393
M13790	6B	469537832	0.086959143	0.329896907	99	0.029485141	0.061424774	0.085978233	51.5869395
M13290	6B	230607608	0.086986146	0.288659794	99	0.029485141	0.061419219	0.048997844	29.39870669
M4971	2B	623392065	0.087007368	0.432989691	99	0.029485141	0.061414856	0.045150328	27.09019665
M591	1A	420194142	0.087053004	0.371134021	99	0.029485141	0.061405476	0.038547032	23.12821908
M15589	7B	648660809	0.087172695	0.391752577	99	0.029485141	0.061380901	0.080019583	-48.01174978
M446	1A	532918571	0.087181391	0.268041237	99	0.029485141	0.061379117	0.046369999	27.82199927
M14301	7A	16978938	0.087225004	0.453608247	99	0.029485141	0.061370172	0.044419816	-26.65188937
M7149	3B	24929087	0.087275715	0.268041237	99	0.029485141	0.061359778	0.044119281	-26.47156865
M7656	3B	593933727	0.087296147	0.226804124	99	0.029485141	0.061355592	0.053164237	-31.89854213
M13873	6D	2953198	0.087377662	0.463917526	99	0.029485141	0.061338903	0.04486762	26.92057193
M8456	3D	546706726	0.087436876	0.195876289	99	0.029485141	0.06132679	0.050189162	-30.11349692
M13910	6D	10760221	0.087476138	0.350515464	99	0.029485141	0.061318763	0.04579601	-27.47760579
M1684	1B	615614208	0.087476537	0.412371134	99	0.029485141	0.061318682	0.03956343	-23.73805785
M9999	5A	390232148	0.087499126	0.309278351	99	0.029485141	0.061314066	0.039760575	-23.85634498
M11217	5B	628773372	0.087525104	0.453608247	99	0.029485141	0.061308759	0.053697	-32.21819996
M12581	6A	525799703	0.087585851	0.432989691	99	0.029485141	0.061296356	0.048204373	-28.92262362
M2861	2A	562636225	0.087590468	0.453608247	99	0.029485141	0.061295413	0.043035379	25.82122758
M2931	2A	690962390	0.087688194	0.195876289	99	0.029485141	0.061275481	0.055784975	33.47098482
M4999	2B	0	0.087865553	0.103092784	99	0.029485141	0.061239368	0.057198645	34.31918696
M10281	5A	550570228	0.087893701	0.443298969	99	0.029485141	0.061233644	0.067318603	40.39116167
M11734	5B	0	0.08791213	0.319587629	99	0.029485141	0.061229898	0.072166567	43.29994036
M3452	2B	14601769	0.087946606	0.443298969	99	0.029485141	0.061222892	0.037672609	-22.60356552
M9985	5A	72230055	0.088011006	0.175257732	99	0.029485141	0.061209812	0.050870844	-30.52250645
M11147	5B	529048297	0.088109289	0.257731959	99	0.029485141	0.061189871	0.04373417	26.24050173
M14871	7A	682339108	0.08821331	0.494845361	99	0.029485141	0.061168793	0.058175223	-34.90513396
M2399	2A	185003695	0.088274724	0.453608247	99	0.029485141	0.061156361	0.067383759	-40.4302555
M2095	1D	366012746	0.088311425	0.237113402	99	0.029485141	0.061148937	0.057966273	-34.77976407
M9945	5A	46628073	0.088405655	0.453608247	99	0.029485141	0.06112989	0.055154421	33.09265259
M14242	7A	9756542	0.088412203	0.24742268	99	0.029485141	0.061128567	0.050170874	-30.10252451
M15	1A	25564281	0.088489454	0.309278351	99	0.029485141	0.06111297	0.038384382	-23.03062928
M7631	3B	437778419	0.088540811	0.072164948	99	0.029485141	0.061102609	0.064034789	38.42087347
M9700	4B	669910281	0.088580924	0.402061856	99	0.029485141	0.061094521	0.042905642	-25.74338507
M1114	1B	74705448	0.088586671	0.113402062	99	0.029485141	0.061093363	0.05632967	33.79780213
M11226	5B	34050805	0.088761968	0.432989691	99	0.029485141	0.061058068	0.042106902	-25.26414121
M9330	4A	731504837	0.08887425	0.206185567	99	0.029485141	0.061035501	0.046479593	-27.88775579
M13587	6B	676372364	0.089229659	0.463917526	99	0.029485141	0.060964276	0.039549444	23.72966635
M11025	5B	590849047	0.089279845	0.412371134	99	0.029485141	0.060954244	0.043256291	25.95377479
M14814	7A	635682971	0.089357662	0.24742268	99	0.029485141	0.0609387	0.040605229	24.36313751
M4935	2B	752843256	0.089421787	0.443298969	99	0.029485141	0.060925903	0.040020875	24.01252512
M14557	7A	80428679	0.089434369	0.082474227	99	0.029485141	0.060923393	0.060872667	36.52360006
M1286	1B	390397669	0.089485073	0.288659794	99	0.029485141	0.060913283	0.058440529	-35.06431752
M10095	5A	470192572	0.089510865	0.350515464	99	0.029485141	0.060908143	0.041398463	24.83907806
M6606	3A	675313844	0.089598001	0.18556701	99	0.029485141	0.060890789	0.048667831	-29.20069855
M3522	2B	26310145	0.08971364	0.360824742	99	0.029485141	0.060867786	0.093772172	56.263303
M3048	2A	554574497	0.089736324	0.237113402	99	0.029485141	0.060863278	0.04623759	-27.74255402
M851	1B	0	0.089737271	0.319587629	99	0.029485141	0.06086309	0.040016668	-24.01000063
M6582	3A	659798154	0.089881082	0.237113402	99	0.029485141	0.060834537	0.043919347	26.35160836
M3208	2A	758079104	0.089907023	0.288659794	99	0.029485141	0.060829393	0.045727348	-27.43640858
M8427	3D	446942046	0.0899711	0.24742268	99	0.029485141	0.060816691	0.043921378	26.35282654
M1657	1B	73116851	0.090011027	0.113402062	99	0.029485141	0.060808782	0.057449646	34.46978744
M2839	2A	619688424	0.090028798	0.237113402	99	0.029485141	0.060805262	0.039221737	23.53304214
M1488	1B	555294084	0.09014906	0.226804124	99	0.029485141	0.060781467	0.042275128	-25.36507669
M13067	6B	28730274	0.090232806	0.474226804	99	0.029485141	0.060764918	0.05167049	-31.00229399
M13642	6B	457635925	0.090257728	0.494845361	99	0.029485141	0.060759996	0.038966776	23.38006555
M11826	5B	700372980	0.090730551	0.051546392	99	0.029485141	0.060666905	0.102431591	61.45895443
M11747	5B	679675551	0.090730551	0.051546392	99	0.029485141	0.060666905	0.102431591	-61.45895443
M2862	2A	562636225	0.090760194	0.164948454	99	0.029485141	0.060661087	0.049079441	-29.4476644
M9987	5A	333414537	0.090764153	0.24742268	99	0.029485141	0.06066031	0.04257232	-25.54339223
M8095	3B	41929763	0.090843051	0.226804124	99	0.029485141	0.060644835	0.047725394	-28.6352362
M11841	5B	701189057	0.090999987	0.144329897	99	0.029485141	0.060614097	0.053649099	-32.18945948
M5745	2D	601206508	0.091187653	0.381443299	99	0.029485141	0.060577417	0.043742079	26.24524768
M9799	4D	482953875	0.091296271	0.164948454	99	0.029485141	0.060556225	0.04983133	29.89879776
M4906	2B	757243772	0.091304616	0.164948454	99	0.029485141	0.060554598	0.046393592	27.83615536
M14295	7A	50589773	0.091316845	0.041237113	99	0.029485141	0.060552214	0.098944356	-59.36661371
M7058	3B	17785833	0.09159328	0.020618557	99	0.029485141	0.060498419	0.120119732	72.07183937
M11754	5B	678708672	0.091782075	0.402061856	99	0.029485141	0.060461782	0.048364247	-29.01854843
M13972	6D	60388899	0.091880765	0.278350515	99	0.029485141	0.060442664	0.04841836	29.05101589
M2492	2A	41224247	0.092097684	0.278350515	99	0.029485141	0.060400722	0.047876528	-28.72591674
M9170	4A	709851770	0.092231031	0.494845361	99	0.029485141	0.060374993	0.074192801	-44.51568085
M1769	1B	64478551	0.09233563	0.12371134	99	0.029485141	0.060354839	0.05290519	-31.7431142
M11530	5B	0	0.092505451	0.422680412	99	0.029485141	0.060322173	0.072532701	-43.51962075
M14947	7A	704615462	0.092568653	0.484536082	99	0.029485141	0.060310032	0.048647261	-29.18835687
M3167	2A	512149585	0.092586047	0.360824742	99	0.029485141	0.060306693	0.044000386	-26.40023188
M3296	2A	31477695	0.092682421	0.216494845	99	0.029485141	0.060288202	0.046194372	-27.71662298
M8654	4A	191051343	0.092782884	0.18556701	99	0.029485141	0.060268949	0.046701345	28.0208072
M9723	4D	1206063	0.092883005	0.422680412	99	0.029485141	0.060249784	0.036027684	-21.61661069
M7640	3B	439813360	0.092947852	0.268041237	99	0.029485141	0.060237384	0.043948377	26.36902638
M8316	3D	46582531	0.092952348	0.350515464	99	0.029485141	0.060236524	0.041817224	-25.0903343
M10002	5A	394754024	0.092953852	0.443298969	99	0.029485141	0.060236237	0.037173379	-22.30402756
M5356	2B	791958920	0.09299496	0.103092784	99	0.029485141	0.060228381	0.067740928	-40.64455672
M1361	1B	691739942	0.09317059	0.371134021	99	0.029485141	0.060194863	0.090636441	54.38186448
M793	1B	0	0.093318557	0.298969072	99	0.029485141	0.060166678	0.067871073	-40.72264383
M5083	2B	767775157	0.093376656	0.288659794	99	0.029485141	0.060155625	0.045782662	-27.46959739
M7977	3B	762845618	0.093406374	0.216494845	99	0.029485141	0.060149974	0.045711689	27.42701324
M3018	2A	696839554	0.09346558	0.092783505	99	0.029485141	0.060138722	0.057563512	-34.53810738
M2847	2A	554520335	0.093526133	0.360824742	99	0.029485141	0.060127222	0.039971516	-23.98290967
M4162	2B	680760736	0.093532934	0.195876289	99	0.029485141	0.060125931	0.052627154	-31.57629225
M13251	6B	128193460	0.093622321	0.422680412	99	0.029485141	0.060108971	0.040838175	-24.50290494
M14395	7A	28554017	0.093650893	0.391752577	99	0.029485141	0.060103554	0.070725964	42.43557825
M5702	2D	591603469	0.093650893	0.391752577	99	0.029485141	0.060103554	0.070725964	-42.43557825
M9140	4A	701884398	0.093805047	0.164948454	99	0.029485141	0.060074358	0.073902575	44.34154497
M7791	3B	649788398	0.093867725	0.257731959	99	0.029485141	0.060062502	0.041455947	-24.87356802
M14718	7A	90552202	0.093867798	0.298969072	99	0.029485141	0.060062489	0.040231714	24.13902845
M4137	2B	0	0.094098172	0.422680412	99	0.029485141	0.060018988	0.05596914	33.58148403
M4951	2B	762073843	0.094126596	0.134020619	99	0.029485141	0.060013629	0.054168541	32.50112443
M15139	7A	736414481	0.094146671	0.381443299	99	0.029485141	0.060009845	0.062251536	37.35092155
M13351	6B	188000081	0.094166649	0.412371134	99	0.029485141	0.06000608	0.041868179	25.12090762
M9878	5A	429945514	0.094210996	0.06185567	99	0.029485141	0.059997726	0.068115687	40.86941191
M1906	1B	676717313	0.094226566	0.288659794	99	0.029485141	0.059994795	0.039593351	-23.75601047
M3856	2B	69509022	0.094228636	0.154639175	99	0.029485141	0.059994405	0.049090819	29.45449166
M1340	1B	370842543	0.09428402	0.484536082	99	0.029485141	0.05998398	0.037808825	22.68529479
M14310	7A	17286301	0.094327066	0.092783505	99	0.029485141	0.059975883	0.061317116	-36.79026972
M3906	2B	77115800	0.094333005	0.298969072	99	0.029485141	0.059974766	0.043620056	26.17203355
M9555	4B	0	0.094363191	0.494845361	99	0.029485141	0.05996909	0.063569917	38.1419504
M3141	2A	755679306	0.094524023	0.329896907	99	0.029485141	0.059938885	0.067834141	-40.70048452
M1733	1B	637394257	0.094803331	0.288659794	99	0.029485141	0.059886563	0.039481677	-23.68900625
M3647	2B	46670271	0.094913682	0.443298969	99	0.029485141	0.059865938	0.050461591	-30.27695473
M1043	1B	608745963	0.095130441	0.092783505	99	0.029485141	0.059825503	0.059158501	-35.49510042
M11775	5B	684700913	0.095144688	0.463917526	99	0.029485141	0.059822849	0.06431273	-38.58763779
M6548	3A	649815141	0.095188188	0.360824742	99	0.029485141	0.059814748	0.103386977	62.03218647
M3051	2A	726414431	0.095206917	0.422680412	99	0.029485141	0.059811261	0.045270618	27.16237051
M8545	4A	144845043	0.095458836	0.154639175	99	0.029485141	0.059764437	0.04663389	-27.98033429
M221	1A	0	0.095577815	0.381443299	99	0.029485141	0.059742369	0.044414017	26.64841011
M6079	3A	0	0.095839084	0.412371134	99	0.029485141	0.059694018	0.062758617	-37.65517046
M7082	3B	0	0.095840357	0.226804124	99	0.029485141	0.059693783	0.046152772	-27.69166298
M14080	6D	458025308	0.095927961	0.350515464	99	0.029485141	0.059677603	0.036643248	-21.98594908
M13126	6B	51997445	0.095949631	0.072164948	99	0.029485141	0.059673603	0.065921174	39.55270437
M11234	5B	527149386	0.096011948	0.195876289	99	0.029485141	0.059662107	0.056766747	34.0600485
M9955	5A	52357838	0.096103831	0.24742268	99	0.029485141	0.059645171	0.045521624	27.31297432
M1467	1B	0	0.096116182	0.381443299	99	0.029485141	0.059642896	0.07472859	-44.83715405
M2282	1D	494063368	0.096124316	0.432989691	99	0.029485141	0.059641398	0.054539865	32.72391927
M2667	2A	13835059	0.096139418	0.432989691	99	0.029485141	0.059638617	0.057400973	-34.44058361
M14370	7A	26303410	0.096287668	0.041237113	99	0.029485141	0.05961134	0.084810543	-50.88632567
M8795	4A	597887352	0.096311018	0.020618557	99	0.029485141	0.059607048	0.115222131	69.13327875
M3271	2A	768930684	0.09633841	0.24742268	99	0.029485141	0.059602015	0.044077142	26.44628497
M6968	3B	10656805	0.096445228	0.360824742	99	0.029485141	0.059582402	0.041901586	-25.14095131
M5968	2D	644662016	0.09657739	0.041237113	99	0.029485141	0.059558168	0.088814669	53.28880159
M8544	4A	286309978	0.096588391	0.443298969	99	0.029485141	0.059556153	0.049999203	-29.99952194
M990	1B	577431009	0.096662214	0.18556701	99	0.029485141	0.059542634	0.051025762	30.61545707
M11436	5B	0	0.096790974	0.216494845	99	0.029485141	0.059519083	0.045847404	27.50844236
M12505	6A	266941848	0.096848538	0.319587629	99	0.029485141	0.059508565	0.056276428	33.76585669
M12651	6A	554716169	0.096889113	0.432989691	99	0.029485141	0.059501156	0.054184428	-32.51065702
M13015	6B	456647178	0.097019315	0.206185567	99	0.029485141	0.059477403	0.046921543	28.15292596
M6878	3A	613741323	0.097069706	0.18556701	99	0.029485141	0.059468219	0.043346531	26.00791847
M7588	3B	523570235	0.097093199	0.391752577	99	0.029485141	0.05946394	0.070056436	42.03386158
M7628	3B	580348846	0.097093199	0.391752577	99	0.029485141	0.05946394	0.070056436	42.03386158
M7633	3B	0	0.097093199	0.391752577	99	0.029485141	0.05946394	0.070056436	42.03386158
M7607	3B	434211602	0.097093199	0.391752577	99	0.029485141	0.05946394	0.070056436	-42.03386158
M7629	3B	579446373	0.097093199	0.391752577	99	0.029485141	0.05946394	0.070056436	-42.03386158
M14615	7A	0	0.097116171	0.175257732	99	0.029485141	0.059459756	0.049135561	-29.48133677
M7715	3B	295938838	0.097255306	0.381443299	99	0.029485141	0.05943444	0.078086059	46.85163537
M3373	2A	646343478	0.097387645	0.309278351	99	0.029485141	0.059410398	0.070705188	-42.42311279
M2841	2A	143209404	0.097419546	0.474226804	99	0.029485141	0.059404608	0.045629345	27.3776068
M3097	2A	744286377	0.097473433	0.278350515	99	0.029485141	0.059394832	0.042006828	25.20409679
M3908	2B	976743	0.097554077	0.051546392	99	0.029485141	0.059380214	0.074177619	44.50657115
M13687	6B	614446534	0.097757488	0.463917526	99	0.029485141	0.0593434	0.043715631	26.22937878
M13155	6B	0	0.097831157	0.350515464	99	0.029485141	0.059330088	0.039714696	23.82881775
M14304	7A	17158922	0.097916491	0.082474227	99	0.029485141	0.059314682	0.061131166	36.67869975
M14101	6D	462604983	0.097931488	0.24742268	99	0.029485141	0.059311976	0.045419607	-27.25176431
M14886	7A	674740734	0.097963032	0.412371134	99	0.029485141	0.059306286	0.050429127	-30.2574762
M12162	6A	2403451	0.097979826	0.12371134	99	0.029485141	0.059303258	0.051822017	31.09320994
M9359	4A	4344591	0.097992238	0.206185567	99	0.029485141	0.05930102	0.047026981	-28.21618851
M9588	4B	0	0.098136468	0.237113402	99	0.029485141	0.059275037	0.045194139	-27.11648324
M9938	5A	79264462	0.098142232	0.453608247	99	0.029485141	0.059274	0.058191128	34.91467653
M3193	2A	66819913	0.098144437	0.371134021	99	0.029485141	0.059273603	0.043761678	26.25700709
M6791	3A	726286900	0.098320467	0.072164948	99	0.029485141	0.059241952	0.063447274	-38.06836469
M12205	6A	11590739	0.098377638	0.12371134	99	0.029485141	0.059231686	0.060442495	36.26549708
M1786	1B	646178482	0.098456075	0.164948454	99	0.029485141	0.059217612	0.044661243	26.79674587
M8363	3D	436621773	0.098492397	0.216494845	99	0.029485141	0.059211099	0.052118422	31.27105327
M2663	2A	120722528	0.09850398	0.360824742	99	0.029485141	0.059209022	0.048559502	-29.13570143
M2268	1D	95949764	0.098636259	0.268041237	99	0.029485141	0.059185329	0.04885001	29.31000584
M13701	6B	710012309	0.098681163	0.288659794	99	0.029485141	0.059177293	0.044167569	26.50054121
M9240	4A	727965119	0.098808843	0.350515464	99	0.029485141	0.059154468	0.041687766	-25.01265985
M10101	5A	468931981	0.098830203	0.463917526	99	0.029485141	0.059150653	0.052636648	-31.58198856
M231	1A	261892580	0.098893362	0.412371134	99	0.029485141	0.059139377	0.041646139	-24.98768334
M2953	2A	689761057	0.098906697	0.226804124	99	0.029485141	0.059136997	0.039535772	23.72146309
M11579	5B	581759209	0.098952788	0.319587629	99	0.029485141	0.059128774	0.045069204	27.04152239
M6745	3A	716253361	0.099125661	0.216494845	99	0.029485141	0.059097972	0.044115869	26.46952145
M12447	6A	0	0.099169652	0.391752577	99	0.029485141	0.059090143	0.081628043	48.97682579
M13891	6D	6745747	0.099172346	0.494845361	99	0.029485141	0.059089663	0.048351237	29.01074235
M5253	2B	793259040	0.099210513	0.309278351	99	0.029485141	0.059082874	0.05439067	-32.63440227
M7313	3B	53963394	0.099217647	0.371134021	99	0.029485141	0.059081606	0.053736073	-32.24164367
M3381	2A	585501135	0.099295123	0.371134021	99	0.029485141	0.059067835	0.056330961	-33.79857688
M3571	2B	695616717	0.099412008	0.371134021	99	0.029485141	0.059047081	0.036672354	22.00341228
M11829	5B	692755670	0.099446105	0.278350515	99	0.029485141	0.059041032	0.047125341	28.27520438
M2808	2A	377043313	0.099516291	0.103092784	99	0.029485141	0.059028588	0.055119731	-33.07183872
M9390	4A	732814470	0.099673777	0.103092784	99	0.029485141	0.059000701	0.062523304	37.51398213
M7534	3B	488191801	0.099695577	0.350515464	99	0.029485141	0.058996844	0.061003081	-36.60184852
M7725	3B	42311437	0.099866581	0.350515464	99	0.029485141	0.058966626	0.043049847	25.82990839
M4264	2B	328673302	0.099982676	0.319587629	99	0.029485141	0.058946143	0.039047969	23.42878153
M13372	6B	206564330	0.100080252	0.402061856	99	0.029485141	0.058928948	0.045210479	27.12628726
M6104	3A	18171651	0.100099864	0.164948454	99	0.029485141	0.058925495	0.052399588	31.4397526
M1380	1B	444421058	0.100118776	0.164948454	99	0.029485141	0.058922165	0.05467566	-32.80539583
M1580	1B	424743133	0.100133591	0.206185567	99	0.029485141	0.058919557	0.042239422	-25.34365336
M4890	2B	743311212	0.100232202	0.463917526	99	0.029485141	0.058902209	0.04271771	-25.63062607
M9973	5A	65359644	0.100278906	0.453608247	99	0.029485141	0.058893999	0.057631142	34.57868509
M1017	1B	52408379	0.100295882	0.051546392	99	0.029485141	0.058891016	0.077499579	46.49974742
M13108	6B	24914373	0.100302712	0.175257732	99	0.029485141	0.058889816	0.042870118	25.72207086
M7551	3B	473710563	0.100342123	0.113402062	99	0.029485141	0.058882893	0.053239715	-31.94382919
M6760	3A	585937578	0.100425042	0.06185567	99	0.029485141	0.058868338	0.069608273	41.76496381
M8550	4A	21051247	0.100469207	0.134020619	99	0.029485141	0.058860591	0.05977513	-35.86507806
M7971	3B	146553872	0.100840423	0.206185567	99	0.029485141	0.058795625	0.040271941	-24.16316478
M13	1A	0	0.100894046	0.432989691	99	0.029485141	0.058786262	0.033491625	-20.09497492
M8645	4A	413875836	0.101002972	0.371134021	99	0.029485141	0.058767261	0.048088257	-28.85295438
M5706	2D	591603469	0.10105084	0.371134021	99	0.029485141	0.058758917	0.070085678	42.05140689
M1621	1B	589768769	0.101196002	0.463917526	99	0.029485141	0.058733644	0.053057303	-31.83438164
M6559	3A	651994615	0.101198086	0.134020619	99	0.029485141	0.058733281	0.049385879	-29.6315274
M9561	4B	540718898	0.10143871	0.020618557	99	0.029485141	0.058691476	0.112535187	67.52111216
M4000	2B	213709998	0.101441669	0.237113402	99	0.029485141	0.058690962	0.040543668	24.32620063
M1736	1B	635977802	0.10155995	0.278350515	99	0.029485141	0.058670454	0.041178438	-24.70706307
M15021	7A	713008363	0.101664156	0.329896907	99	0.029485141	0.058652407	0.038723679	23.23420765
M3364	2A	668356755	0.101704264	0.371134021	99	0.029485141	0.058645467	0.039586019	23.75161125
M3390	2A	748982898	0.102017372	0.103092784	99	0.029485141	0.05859139	0.061886421	37.13185289
M4004	2B	195531990	0.102059541	0.082474227	99	0.029485141	0.058584121	0.060012292	36.00737534
M10078	5A	474478884	0.102108939	0.484536082	99	0.029485141	0.058575611	0.063926577	38.35594601
M6564	3A	650055169	0.102245289	0.092783505	99	0.029485141	0.058552143	0.064238033	-38.54282
M9316	4A	336207656	0.102266026	0.072164948	99	0.029485141	0.058548577	0.074989768	-44.99386082
M7507	3B	47059876	0.102307479	0.381443299	99	0.029485141	0.058541451	0.034404005	20.64240311
M14302	7A	16978938	0.102343613	0.268041237	99	0.029485141	0.058535241	0.042579336	-25.54760144
M12734	6A	594854466	0.102350494	0.319587629	99	0.029485141	0.058534059	0.039238197	-23.54291818
M11751	5B	679651559	0.102410387	0.134020619	99	0.029485141	0.058523774	0.048653006	-29.19180384
M2641	2A	132163747	0.102414259	0.195876289	99	0.029485141	0.058523109	0.05260723	31.56433774
M3135	2A	756929010	0.102642325	0.360824742	99	0.029485141	0.058484005	0.076127886	45.67673154
M3436	2B	15951770	0.102698669	0.463917526	99	0.029485141	0.058474359	0.035392186	21.23531163
M13806	6B	0	0.102722599	0.082474227	99	0.029485141	0.058470264	0.060726557	36.43593442
M2607	2A	82861639	0.102753952	0.443298969	99	0.029485141	0.0584649	0.037845983	22.70758967
M14589	7A	92419577	0.102826715	0.18556701	99	0.029485141	0.05845246	0.041653986	-24.99239137
M10629	5B	32418282	0.102827861	0.402061856	99	0.029485141	0.058452264	0.047174176	28.3045058
M14136	7A	4013265	0.102900246	0.484536082	99	0.029485141	0.058439898	0.035954607	-21.57276419
M11417	5B	536046290	0.102947621	0.154639175	99	0.029485141	0.05843181	0.047379691	28.42781431
M4391	2B	561223406	0.102949252	0.237113402	99	0.029485141	0.058431531	0.048026286	-28.81577138
M9708	4B	86304081	0.103058432	0.371134021	99	0.029485141	0.058412907	0.067602671	40.56160265
M435	1A	520868188	0.103065755	0.453608247	99	0.029485141	0.058411659	0.049674507	29.80470399
M6080	3A	0	0.103096829	0.072164948	99	0.029485141	0.058406363	0.065252749	39.15164968
M7495	3B	335094862	0.103157645	0.371134021	99	0.029485141	0.058396003	0.081775437	-49.06526238
M14186	7A	10270141	0.103225905	0.12371134	99	0.029485141	0.058384383	0.05162152	-30.97291227
M13463	6B	549715721	0.103247653	0.195876289	99	0.029485141	0.058380682	0.04204087	-25.22452188
M11854	5B	696426421	0.1033041	0.432989691	99	0.029485141	0.058371081	0.045040947	-27.02456846
M14609	7A	108785756	0.103305512	0.453608247	99	0.029485141	0.058370842	0.044860427	-26.9162562
M9552	4B	594693866	0.103335336	0.494845361	99	0.029485141	0.058365771	0.057082136	-34.24928147
M9583	4B	618159692	0.103335336	0.494845361	99	0.029485141	0.058365771	0.057082136	34.24928147
M9602	4B	490329940	0.103335336	0.494845361	99	0.029485141	0.058365771	0.057082136	34.24928147
M9619	4B	502382967	0.103335336	0.494845361	99	0.029485141	0.058365771	0.057082136	34.24928147
M6204	3A	569927711	0.103397315	0.195876289	99	0.029485141	0.05835524	0.042584189	25.55051339
M437	1A	531239793	0.10344559	0.278350515	99	0.029485141	0.058347043	0.042712329	-25.6273977
M4220	2B	592403905	0.103448536	0.226804124	99	0.029485141	0.058346542	0.040024364	-24.01461846
M5905	2D	755037267	0.103572165	0.340206186	99	0.029485141	0.058325569	0.037251094	-22.35065665
M5017	2B	766527144	0.103651907	0.350515464	99	0.029485141	0.058312055	0.050786838	-30.47210272
M4697	2B	594098170	0.103802206	0.443298969	99	0.029485141	0.058286616	0.051411207	-30.84672404
M386	1A	197865491	0.103871343	0.402061856	99	0.029485141	0.058274928	0.03776316	-22.65789592
M1124	1B	95336138	0.103887345	0.371134021	99	0.029485141	0.058272224	0.069824178	41.89450705
M11252	5B	441249939	0.104028124	0.113402062	99	0.029485141	0.058248455	0.058177516	34.90650974
M10853	5B	126862058	0.10403556	0.360824742	99	0.029485141	0.0582472	0.094807993	-56.88479598
M11974	5D	14432137	0.104060275	0.463917526	99	0.029485141	0.058243031	0.035034727	21.02083623
M11952	5D	541701594	0.104224439	0.329896907	99	0.029485141	0.058215369	0.115290304	-69.17418216
M6864	3A	0	0.10422825	0.072164948	99	0.029485141	0.058214727	0.062858679	-37.71520725
M15506	7B	0	0.104241192	0.309278351	99	0.029485141	0.058212548	0.047056806	28.23408361
M314	1A	562808063	0.104260082	0.381443299	99	0.029485141	0.058209369	0.045103684	27.06221022
M14980	7A	824552473	0.104322572	0.072164948	99	0.029485141	0.058198856	0.062212161	37.32729643
M5671	2D	0	0.104408445	0.278350515	99	0.029485141	0.05818442	0.046063972	27.6383831
M13036	6B	20743122	0.104423793	0.030927835	99	0.029485141	0.058181841	0.098638801	59.18328059
M6740	3A	714415122	0.104471934	0.12371134	99	0.029485141	0.058173756	0.053954773	-32.37286408
M8234	3B	823095734	0.104579413	0.360824742	99	0.029485141	0.058155719	0.0405414	-24.3248403
M13151	6B	100895291	0.104593304	0.412371134	99	0.029485141	0.058153389	0.066673704	-40.0042221
M9711	4B	667427561	0.104633262	0.402061856	99	0.029485141	0.058146689	0.06689527	-40.13716198
M2220	1D	438024561	0.104645266	0.453608247	99	0.029485141	0.058144677	0.050779673	-30.46780352
M1439	1B	490006557	0.104774228	0.453608247	99	0.029485141	0.058123078	0.044079718	-26.44783109
M6085	3A	7794910	0.104812624	0.484536082	99	0.029485141	0.058116652	0.044268219	-26.56093115
M14607	7A	112350901	0.10483073	0.18556701	99	0.029485141	0.058113623	0.050094057	30.05643439
M11248	5B	513202029	0.105050228	0.092783505	99	0.029485141	0.058076949	0.060517161	36.31029655
M14670	7A	148468027	0.105183163	0.463917526	99	0.029485141	0.05805478	0.049569888	-29.74193298
M6131	3A	0	0.105197416	0.154639175	99	0.029485141	0.058052405	0.05496776	32.98065616
M2529	2A	15966155	0.105230485	0.432989691	99	0.029485141	0.058046896	0.045048529	27.02911757
M11423	5B	538039474	0.105242981	0.443298969	99	0.029485141	0.058044815	0.054854859	-32.9129156
M5645	2D	593683763	0.105403449	0.134020619	99	0.029485141	0.058018112	0.048974142	29.38448545
M15461	7B	592534782	0.105447808	0.113402062	99	0.029485141	0.058010738	0.061517127	-36.91027592
M7230	3B	0	0.105455441	0.226804124	99	0.029485141	0.05800947	0.044173302	26.50398136
M14623	7A	199855285	0.105470285	0.443298969	99	0.029485141	0.058007004	0.035859096	21.51545752
M10113	5A	472767669	0.105648542	0.350515464	99	0.029485141	0.057977415	0.045635568	-27.38134097
M4945	2B	760153315	0.105675549	0.381443299	99	0.029485141	0.057972937	0.044006415	-26.40384894
M10926	5B	557361423	0.10589358	0.402061856	99	0.029485141	0.057936832	0.043123853	25.87431209
M1411	1B	0	0.105900742	0.06185567	99	0.029485141	0.057935647	0.066313649	39.78818943
M7285	3B	0	0.105960603	0.402061856	99	0.029485141	0.05792575	0.035251001	-21.1506003
M12982	6B	6682335	0.106050902	0.154639175	99	0.029485141	0.057910831	0.044738844	26.84330617
M13154	6B	88747690	0.106146809	0.226804124	99	0.029485141	0.057895002	0.041298187	-24.77891212
M2242	1D	462396004	0.106249747	0.432989691	99	0.029485141	0.05787803	0.05580763	-33.48457817
M13008	6B	11974839	0.106278322	0.494845361	99	0.029485141	0.057873322	0.055586528	-33.35191652
M15123	7A	633614732	0.106315168	0.422680412	99	0.029485141	0.057867253	0.042878666	-25.72719943
M1716	1B	630932576	0.106392941	0.020618557	99	0.029485141	0.057854451	0.115167029	-69.10021758
M7592	3B	379343215	0.106407737	0.06185567	99	0.029485141	0.057852016	0.066668627	-40.0011765
M13968	6D	19192621	0.106408576	0.432989691	99	0.029485141	0.057851878	0.041170495	-24.70229706
M13422	6B	385786422	0.106417806	0.463917526	99	0.029485141	0.05785036	0.047553715	28.53222895
M7521	3B	470866029	0.106478787	0.329896907	99	0.029485141	0.057840332	0.079030113	47.41806756
M11413	5B	233925191	0.106504495	0.206185567	99	0.029485141	0.057836106	0.042541756	-25.52505382
M861	1B	16897282	0.106784639	0.432989691	99	0.029485141	0.057790132	0.05956789	35.74073401
M10036	5A	445275979	0.106833752	0.494845361	99	0.029485141	0.057782086	0.037224364	22.33461848
M5922	2D	695112271	0.106864408	0.432989691	99	0.029485141	0.057777066	0.058780305	-35.26818308
M704	1B	3572450	0.106869077	0.484536082	99	0.029485141	0.057776301	0.043843807	-26.30628416
M813	1B	0	0.10688042	0.340206186	99	0.029485141	0.057774444	0.057352291	34.41137449
M11600	5B	683229885	0.106907884	0.432989691	99	0.029485141	0.057769949	0.042125511	-25.2753068
M9230	4A	14039828	0.106913712	0.484536082	99	0.029485141	0.057768995	0.033384245	20.03054674
M10329	5A	565404888	0.106919176	0.226804124	99	0.029485141	0.057768101	0.042709195	-25.62551713
M6249	3A	0	0.107038453	0.226804124	99	0.029485141	0.057748595	0.037882374	-22.72942466
M8227	3B	28789197	0.107049076	0.134020619	99	0.029485141	0.057746859	0.052290672	-31.37440302
M10170	5A	496499995	0.107122588	0.360824742	99	0.029485141	0.05773485	0.035248282	21.14896947
M9732	4D	0	0.107133435	0.175257732	99	0.029485141	0.057733079	0.043006736	-25.80404144
M754	1B	761679922	0.107139308	0.298969072	99	0.029485141	0.05773212	0.041252836	24.75170153
M7675	3B	154191322	0.107224543	0.453608247	99	0.029485141	0.057718211	0.052941574	31.76494414
M14400	7A	29808021	0.107241672	0.494845361	99	0.029485141	0.057715417	0.05223419	31.34051407
M2843	2A	532080572	0.107286522	0.06185567	99	0.029485141	0.057708104	0.06883014	41.29808421
M14291	7A	16302848	0.107329686	0.453608247	99	0.029485141	0.057701069	0.047736276	-28.64176587
M7201	3B	217469027	0.107472059	0.381443299	99	0.029485141	0.057677888	0.08046686	-48.28011574
M9020	4A	231448891	0.107580114	0.402061856	99	0.029485141	0.057660317	0.073100257	-43.86015437
M9556	4B	0	0.107694699	0.175257732	99	0.029485141	0.057641706	0.055384706	33.23082338
M9614	4B	497897632	0.107694699	0.175257732	99	0.029485141	0.057641706	0.055384706	33.23082338
M14499	7A	82434448	0.107868886	0.082474227	99	0.029485141	0.057613457	0.062134485	37.28069096
M10239	5A	534107889	0.108029922	0.422680412	99	0.029485141	0.057587385	0.066099412	-39.65964692
M14040	6D	421558768	0.108057937	0.154639175	99	0.029485141	0.057582854	0.051350738	30.81044269
M967	1B	186541242	0.108103236	0.494845361	99	0.029485141	0.05757553	0.052250731	-31.3504388
M10418	5A	585223448	0.108111748	0.072164948	99	0.029485141	0.057574155	0.061725171	-37.03510231
M4605	2B	577023815	0.108118614	0.340206186	99	0.029485141	0.057573045	0.092929914	55.75794849
M15324	7B	337120635	0.10813449	0.371134021	99	0.029485141	0.057570479	0.040091953	-24.05517155
M8941	4A	658376429	0.108224607	0.443298969	99	0.029485141	0.057555924	0.057872803	34.7236817
M469	1A	410991937	0.108324521	0.484536082	99	0.029485141	0.057539802	0.046116458	27.66987491
M9331	4A	732349694	0.108354866	0.422680412	99	0.029485141	0.057534909	0.080914873	-48.54892395
M8419	3D	411004230	0.108359997	0.175257732	99	0.029485141	0.057534082	0.058567408	-35.14044488
M9096	4A	640249155	0.108596907	0.278350515	99	0.029485141	0.057495936	0.048762507	29.25750401
M12964	6B	0	0.108613311	0.175257732	99	0.029485141	0.057493298	0.045788478	-27.47308666
M15399	7B	0	0.108668658	0.18556701	99	0.029485141	0.057484401	0.043973628	26.38417666
M5437	2D	607996993	0.108669248	0.453608247	99	0.029485141	0.057484306	0.045311905	-27.18714329
M14878	7A	690860873	0.108672694	0.371134021	99	0.029485141	0.057483752	0.048411232	29.04673933
M9094	4A	690916906	0.108686469	0.340206186	99	0.029485141	0.057481539	0.093420262	56.05215691
M2115	1D	472550886	0.108694739	0.412371134	99	0.029485141	0.05748021	0.039780669	-23.86840152
M13452	6B	59244510	0.108776396	0.268041237	99	0.029485141	0.057467097	0.040606629	24.36397733
M6051	3A	143037183	0.108805269	0.206185567	99	0.029485141	0.057462463	0.047699119	-28.61947146
M2219	1D	438024561	0.109025925	0.206185567	99	0.029485141	0.057427092	0.051313298	30.78797882
M11510	5B	0	0.109040797	0.340206186	99	0.029485141	0.057424711	0.159084938	95.4509631
M14488	7A	50010206	0.109040797	0.340206186	99	0.029485141	0.057424711	0.159084938	95.4509631
M6965	3B	10656805	0.109040797	0.340206186	99	0.029485141	0.057424711	0.159084938	95.4509631
M1803	1B	655311824	0.109040797	0.340206186	99	0.029485141	0.057424711	0.159084938	-95.4509631
M4634	2B	194674315	0.109123999	0.226804124	99	0.029485141	0.057411397	0.046747029	28.04821737
M11577	5B	581759209	0.109180233	0.268041237	99	0.029485141	0.057402405	0.03784253	22.70551774
M4508	2B	690747730	0.10918925	0.340206186	99	0.029485141	0.057400963	0.038056549	22.83392955
M4126	2B	52218686	0.109211506	0.072164948	99	0.029485141	0.057397406	0.068045524	40.82731434
M8500	3D	613900663	0.109215128	0.144329897	99	0.029485141	0.057396827	0.055736861	33.4421164
M15198	7B	23321643	0.109301154	0.360824742	99	0.029485141	0.057383086	0.041638892	24.98333503
M140	1A	22588813	0.109307262	0.237113402	99	0.029485141	0.057382111	0.060108244	36.06494614
M12207	6A	471614870	0.109326744	0.340206186	99	0.029485141	0.057379001	0.049256753	-29.55405201
M3729	2B	78873105	0.109400306	0.412371134	99	0.029485141	0.057367263	0.067724687	40.63481214
M8446	3D	728753357	0.109452734	0.474226804	99	0.029485141	0.057358903	0.056707171	-34.02430279
M1243	1B	89236847	0.109462539	0.329896907	99	0.029485141	0.05735734	0.083222212	49.93332701
M3026	2A	721105596	0.10947897	0.216494845	99	0.029485141	0.057354721	0.041305428	24.7832569
M9820	4D	30126321	0.109542159	0.412371134	99	0.029485141	0.057344653	0.037996698	22.7980186
M11838	5B	703289576	0.109590111	0.020618557	99	0.029485141	0.057337018	0.111171968	66.70318091
M5108	2B	0	0.109590111	0.020618557	99	0.029485141	0.057337018	0.111171968	66.70318091
M11839	5B	621241019	0.109753376	0.350515464	99	0.029485141	0.057311049	0.11215749	-67.294494
M3775	2B	0	0.109827289	0.298969072	99	0.029485141	0.057299306	0.039524874	-23.71492422
M14337	7A	21081193	0.109902952	0.371134021	99	0.029485141	0.057287294	0.079794191	47.8765145
M1369	1B	482183961	0.109977623	0.257731959	99	0.029485141	0.05727545	0.04567088	27.40252823
M15169	7B	66548049	0.110155135	0.453608247	99	0.029485141	0.057247327	0.050387556	30.2325338
M174	1A	36555131	0.110384064	0.432989691	99	0.029485141	0.057211134	0.036651106	21.99066379
M1568	1B	592833254	0.110404138	0.350515464	99	0.029485141	0.057207964	0.041382865	24.82971896
M1486	1B	556105423	0.110420582	0.432989691	99	0.029485141	0.057205368	0.035507002	21.30420109
M6202	3A	23155739	0.110458417	0.237113402	99	0.029485141	0.057199396	0.050342436	-30.20546149
M4146	2B	184403011	0.110487615	0.164948454	99	0.029485141	0.05719479	0.055287162	-33.17229715
M700	1A	590240846	0.110518107	0.051546392	99	0.029485141	0.057189981	0.073018148	43.81088882
M9348	4A	18775545	0.110556066	0.020618557	99	0.029485141	0.057183995	0.110068977	-66.04138637
M11182	5B	512799727	0.110623181	0.422680412	99	0.029485141	0.057173419	0.052565148	31.53908877
M14965	7A	712051192	0.110684072	0.329896907	99	0.029485141	0.057163829	0.061384471	36.83068272
M11158	5B	518232510	0.110688294	0.309278351	99	0.029485141	0.057163165	0.042749821	25.64989232
M359	1A	641985039	0.110754671	0.340206186	99	0.029485141	0.057152718	0.091868335	-55.12100078
M8902	4A	668789773	0.110829041	0.06185567	99	0.029485141	0.057141023	0.066571013	39.94260803
M5816	2D	605908690	0.110958319	0.257731959	99	0.029485141	0.057120712	0.039313409	-23.58804515
M15335	7B	229832873	0.110959112	0.144329897	99	0.029485141	0.057120588	0.048866204	29.31972268
M969	1B	137130287	0.111040671	0.494845361	99	0.029485141	0.057107788	0.052819394	31.69163667
M1636	1B	0	0.111068091	0.206185567	99	0.029485141	0.057103487	0.041246973	24.74818404
M779	1B	231095837	0.111084365	0.432989691	99	0.029485141	0.057100935	0.057377066	34.42623978
M14503	7A	55923161	0.111094837	0.144329897	99	0.029485141	0.057099293	0.049099612	29.45976746
M11837	5B	703289576	0.11112259	0.288659794	99	0.029485141	0.057094943	0.048527322	29.11639321
M15166	7B	6150408	0.111144252	0.113402062	99	0.029485141	0.057091548	0.051089845	-30.65390682
M9639	4B	657270812	0.111191122	0.381443299	99	0.029485141	0.057084204	0.033650822	-20.19049295
M4304	2B	216469247	0.111244336	0.360824742	99	0.029485141	0.057075871	0.034717526	-20.83051534
M5780	2D	586846415	0.111275904	0.412371134	99	0.029485141	0.05707093	0.045472173	27.28330369
M4235	2B	239570710	0.111314167	0.350515464	99	0.029485141	0.057064943	0.051664629	-30.99877754
M9948	5A	46628073	0.11137837	0.412371134	99	0.029485141	0.057054902	0.041713107	25.0278644
M9347	4A	18775545	0.111553872	0.340206186	99	0.029485141	0.057027488	0.092494902	55.49694113
M9337	4A	728781198	0.111573177	0.371134021	99	0.029485141	0.057024476	0.046298399	-27.7790397
M6738	3A	715541796	0.111599508	0.24742268	99	0.029485141	0.057020368	0.045656494	27.39389655
M4102	2B	398394917	0.111673745	0.18556701	99	0.029485141	0.057008792	0.050038579	-30.02314746
M11035	5B	497219633	0.111737218	0.340206186	99	0.029485141	0.056998901	0.042135257	-25.28115434
M6769	3A	0	0.111749503	0.402061856	99	0.029485141	0.056996987	0.062176747	-37.3060482
M15325	7B	200352412	0.111830488	0.18556701	99	0.029485141	0.056984378	0.045526155	-27.31569307
M13996	6D	156753575	0.111883961	0.402061856	99	0.029485141	0.056976058	0.068062451	-40.83747042
M3438	2B	13755354	0.111986805	0.113402062	99	0.029485141	0.056960068	0.054450422	-32.67025325
M6619	3A	686200851	0.111991137	0.24742268	99	0.029485141	0.056959395	0.05449294	-32.69576415
M3157	2A	757808658	0.112034001	0.288659794	99	0.029485141	0.056952736	0.038472892	-23.08373539
M8593	4A	444907045	0.112130571	0.432989691	99	0.029485141	0.056937745	0.060618902	36.37134118
M11171	5B	425076594	0.112143665	0.298969072	99	0.029485141	0.056935713	0.056789361	34.07361663
M4734	2B	712640982	0.112156823	0.391752577	99	0.029485141	0.056933672	0.043659411	26.19564657
M4669	2B	576580481	0.112158697	0.494845361	99	0.029485141	0.056933381	0.054420995	-32.65259673
M1810	1B	653681729	0.112169313	0.082474227	99	0.029485141	0.056931734	0.059802061	-35.88123652
M3532	2B	9887842	0.112191366	0.082474227	99	0.029485141	0.056928314	0.065383421	39.23005262
M1589	1B	573008421	0.112225807	0.432989691	99	0.029485141	0.056922974	0.043455577	26.0733459
M740	1B	7160074	0.11238631	0.443298969	99	0.029485141	0.056898113	0.049780161	-29.86809665
M1732	1B	636679505	0.112494185	0.463917526	99	0.029485141	0.056881425	0.064567308	38.74038497
M317	1A	474225238	0.11253761	0.391752577	99	0.029485141	0.056874713	0.059046346	35.42780774
M3708	2B	293132103	0.112537975	0.154639175	99	0.029485141	0.056874657	0.048375169	29.02510118
M1480	1B	555122455	0.112759891	0.432989691	99	0.029485141	0.056840399	0.048238539	28.94312359
M1541	1B	545644656	0.112909381	0.484536082	99	0.029485141	0.056817365	0.046868808	28.12128485
M3786	2B	0	0.112994639	0.103092784	99	0.029485141	0.056804244	0.056063785	-33.6382707
M10912	5B	369307760	0.113094221	0.206185567	99	0.029485141	0.056788931	0.043012089	25.8072534
M44	1A	1674029	0.113157059	0.195876289	99	0.029485141	0.056779277	0.048803514	29.28210822
M4263	2B	328673302	0.113188948	0.371134021	99	0.029485141	0.056774379	0.074551034	44.7306205
M7331	3B	47283315	0.113205843	0.103092784	99	0.029485141	0.056771786	0.053886865	-32.33211925
M10963	5B	567730502	0.113320414	0.391752577	99	0.029485141	0.056754207	0.04892578	29.35546773
M14755	7A	592045757	0.113333125	0.412371134	99	0.029485141	0.056752257	0.061973497	37.18409794
M1409	1B	512275631	0.113656308	0.360824742	99	0.029485141	0.056702784	0.037089272	22.2535633
M3275	2A	768676643	0.11367973	0.360824742	99	0.029485141	0.056699204	0.045837426	-27.50245565
M7486	3B	495521725	0.113809962	0.329896907	99	0.029485141	0.056679317	0.110682174	66.40930424
M3638	2B	306113161	0.11387743	0.175257732	99	0.029485141	0.056669025	0.042852802	25.71168121
M10059	5A	469608194	0.113953127	0.329896907	99	0.029485141	0.056657485	0.043916232	-26.3497391
M7274	3B	49148259	0.113962982	0.257731959	99	0.029485141	0.056655983	0.038124639	22.87478352
M2820	2A	559553702	0.113987856	0.113402062	99	0.029485141	0.056652193	0.050069824	-30.04189441
M3614	2B	26497203	0.114048953	0.257731959	99	0.029485141	0.056642888	0.046878204	-28.12692263
M785	1B	0	0.114216007	0.474226804	99	0.029485141	0.056617475	0.034677921	20.8067524
M12808	6A	689032602	0.114350542	0.18556701	99	0.029485141	0.056597039	0.047359226	-28.41553534
M9721	4D	1206063	0.114426256	0.422680412	99	0.029485141	0.05658555	0.054479416	-32.68764936
M4148	2B	184403011	0.114451839	0.06185567	99	0.029485141	0.05658167	0.063947599	-38.36855931
M4115	2B	416058086	0.114455387	0.474226804	99	0.029485141	0.056581132	0.042993814	-25.79628843
M15448	7B	582709177	0.114462912	0.463917526	99	0.029485141	0.056579991	0.052380243	31.42814563
M4303	2B	216469247	0.114507692	0.432989691	99	0.029485141	0.056573203	0.06435879	38.61527405
M958	1B	3211739	0.114787804	0.051546392	99	0.029485141	0.056530805	0.072227489	43.33649311
M10707	5B	119188411	0.11485522	0.030927835	99	0.029485141	0.056520618	0.091557354	-54.93441226
M11271	5B	519661386	0.114880055	0.381443299	99	0.029485141	0.056516867	0.063869765	-38.32185894
M11625	5B	596993685	0.115036791	0.319587629	99	0.029485141	0.056493216	0.036323516	21.79410977
M8161	3B	817331152	0.115119732	0.422680412	99	0.029485141	0.056480715	0.06048121	-36.28872584
M14569	7A	27346450	0.115188829	0.360824742	99	0.029485141	0.056470308	0.049258423	29.55505368
M10518	5A	685961373	0.115249075	0.484536082	99	0.029485141	0.05646124	0.048825771	-29.29546243
M15197	7B	23321643	0.115366506	0.484536082	99	0.029485141	0.056443579	0.051166644	30.69998629
M9147	4A	22270015	0.115558138	0.463917526	99	0.029485141	0.056414803	0.057833287	-34.69997226
M1192	1B	143362254	0.115559039	0.288659794	99	0.029485141	0.056414668	0.052858801	31.71528047
M14514	7A	55205086	0.115605234	0.402061856	99	0.029485141	0.05640774	0.043078119	25.8468714
M13808	6B	715750911	0.115637472	0.463917526	99	0.029485141	0.056402906	0.047740088	-28.64405282
M12695	6A	415890191	0.115643582	0.494845361	99	0.029485141	0.05640199	0.044295146	26.57708748
M7815	3B	731136697	0.115644785	0.226804124	99	0.029485141	0.05640181	0.051165065	-30.69903921
M468	1A	422061458	0.115819486	0.453608247	99	0.029485141	0.056375645	0.043449804	-26.06988224
M8677	4A	374355718	0.115905667	0.257731959	99	0.029485141	0.056362754	0.042241497	-25.3448981
M658	1A	583529682	0.115940621	0.463917526	99	0.029485141	0.056357528	0.052347733	31.40863957
M1799	1B	746101578	0.116077499	0.329896907	99	0.029485141	0.056337083	0.0784587	47.07521994
M1740	1B	460149819	0.116081215	0.412371134	99	0.029485141	0.056336528	0.045282138	-27.16928288
M11134	5B	0	0.116278101	0.030927835	99	0.029485141	0.056307168	0.089280843	-53.56850607
M6230	3A	563120760	0.116307449	0.432989691	99	0.029485141	0.056302796	0.036057292	21.6343752
M9441	4B	1774223	0.116319199	0.494845361	99	0.029485141	0.056301047	0.043445032	26.06701903
M6268	3A	41617458	0.116358424	0.195876289	99	0.029485141	0.056295206	0.04685451	28.11270616
M5145	2B	781107698	0.116360872	0.412371134	99	0.029485141	0.056294842	0.061999599	37.19975967
M14958	7A	83500014	0.116371739	0.453608247	99	0.029485141	0.056293224	0.040637812	24.38268728
M5558	2D	632239916	0.116430551	0.216494845	99	0.029485141	0.056284473	0.047819184	28.6915101
M6096	3A	140700735	0.116477156	0.164948454	99	0.029485141	0.056277541	0.051555653	30.933392
M8278	3D	0	0.116502962	0.484536082	99	0.029485141	0.056273704	0.036183969	-21.71038157
M9557	4B	596374461	0.116673234	0.494845361	99	0.029485141	0.056248412	0.055271565	33.16293891
M13912	6D	12019181	0.116816648	0.494845361	99	0.029485141	0.056227142	0.04446677	26.6800619
M10018	5A	703528447	0.116889566	0.113402062	99	0.029485141	0.056216339	0.056549481	-33.92968845
M15378	7B	468150485	0.11710236	0.432989691	99	0.029485141	0.056184855	0.055215225	33.12913514
M3354	2A	766445675	0.117217825	0.494845361	99	0.029485141	0.056167798	0.034249368	20.54962104
M5591	2D	739690772	0.11734003	0.391752577	99	0.029485141	0.056149766	0.045549991	27.32999451
M13778	6B	471345155	0.117500865	0.463917526	99	0.029485141	0.056126066	0.041313798	-24.7882787
M14633	7A	156267353	0.117513389	0.237113402	99	0.029485141	0.056124222	0.046343849	27.80630953
M9793	4D	403180673	0.117561794	0.350515464	99	0.029485141	0.056117097	0.04356452	26.13871212
M10212	5A	512585815	0.11781854	0.340206186	99	0.029485141	0.056079361	0.042676382	-25.60582899
M13611	6B	682537418	0.117848599	0.164948454	99	0.029485141	0.056074949	0.048686863	-29.21211805
M13713	6B	0	0.117858073	0.164948454	99	0.029485141	0.056073559	0.048906732	29.34403904
M111	1A	329686048	0.11786546	0.443298969	99	0.029485141	0.056072475	0.038479278	-23.08756665
M9952	5A	64983046	0.117921194	0.175257732	99	0.029485141	0.056064299	0.050098181	30.05890884
M6800	3A	729897788	0.118037746	0.443298969	99	0.029485141	0.056047216	0.051711569	31.02694123
M12500	6A	127787324	0.118098172	0.329896907	99	0.029485141	0.056038367	0.085447111	-51.26826645
M8368	3D	11455013	0.118192251	0.432989691	99	0.029485141	0.056024599	0.048016804	28.81008265
M5387	2D	15732248	0.118256672	0.371134021	99	0.029485141	0.056015179	0.081151711	48.69102633
M10240	5A	534107889	0.118275435	0.371134021	99	0.029485141	0.056012436	0.087630842	52.57850539
M14939	7A	83447347	0.118275435	0.371134021	99	0.029485141	0.056012436	0.087630842	52.57850539
M14342	7A	0	0.118275435	0.371134021	99	0.029485141	0.056012436	0.087630842	-52.57850539
M5378	2D	13833777	0.118498129	0.206185567	99	0.029485141	0.055979921	0.041240419	24.7442517
M10147	5A	458562227	0.118539152	0.360824742	99	0.029485141	0.055973939	0.046164642	27.69878543
M14508	7A	55923161	0.118635601	0.082474227	99	0.029485141	0.055959884	0.0570741	-34.24445971
M14907	7A	690860873	0.118654416	0.422680412	99	0.029485141	0.055957143	0.058860355	-35.31621284
M13438	6B	617644199	0.118668604	0.443298969	99	0.029485141	0.055955077	0.044525128	-26.71507677
M13829	6B	470111441	0.118670945	0.226804124	99	0.029485141	0.055954736	0.041157428	-24.69445689
M12735	6A	594854466	0.118689704	0.195876289	99	0.029485141	0.055952005	0.042195593	-25.31735558
M8381	3D	149912090	0.118811249	0.484536082	99	0.029485141	0.05593432	0.053808715	-32.28522904
M432	1A	585075445	0.118824561	0.350515464	99	0.029485141	0.055932384	0.035788509	21.47310541
M11007	5B	488902270	0.118908699	0.350515464	99	0.029485141	0.055920155	0.079004642	47.40278528
M12251	6A	16598099	0.118970659	0.484536082	99	0.029485141	0.055911156	0.052641837	-31.58510249
M4354	2B	91206725	0.11906611	0.422680412	99	0.029485141	0.055897303	0.033384958	-20.03097509
M5938	2D	747238713	0.119076279	0.041237113	99	0.029485141	0.055895828	0.083947776	50.36866563
M1600	1B	536709124	0.11911049	0.329896907	99	0.029485141	0.055890866	0.044491298	-26.69477903
M14315	7A	18084583	0.119153266	0.319587629	99	0.029485141	0.055884664	0.089977142	-53.98628531
M14844	7A	316013593	0.119186055	0.463917526	99	0.029485141	0.055879912	0.05128535	30.77121024
M6373	3A	32513740	0.11920627	0.453608247	99	0.029485141	0.055876983	0.047812554	-28.68753269
M4193	2B	674740371	0.119238611	0.474226804	99	0.029485141	0.055872298	0.046784643	-28.07078601
M14204	7A	13966199	0.119280862	0.226804124	99	0.029485141	0.05586618	0.042866013	-25.71960782
M9651	4B	662396344	0.119323148	0.463917526	99	0.029485141	0.055860059	0.048220974	-28.93258413
M12755	6A	595659052	0.119359104	0.484536082	99	0.029485141	0.055854857	0.045146897	27.08813819
M10876	5B	524047080	0.119375818	0.288659794	99	0.029485141	0.055852439	0.048791158	-29.27469496
M7291	3B	557949309	0.119392017	0.360824742	99	0.029485141	0.055850096	0.0901675	54.1005001
M9715	4D	705550759	0.119392345	0.381443299	99	0.029485141	0.055850048	0.046268448	-27.76106883
M6972	3B	476508938	0.119427602	0.010309278	99	0.029485141	0.05584495	0.15219833	91.31899813
M9098	4A	687627700	0.119427602	0.010309278	99	0.029485141	0.05584495	0.15219833	-91.31899813
M9123	4A	702727123	0.119427602	0.010309278	99	0.029485141	0.05584495	0.15219833	-91.31899813
M9800	4D	482953875	0.11948001	0.18556701	99	0.029485141	0.055837375	0.043299659	-25.97979513
M4929	2B	750017811	0.119503722	0.453608247	99	0.029485141	0.055833949	0.043089523	-25.85371353
M6655	3A	703344484	0.11952241	0.24742268	99	0.029485141	0.055831249	0.059634078	35.78044709
M6547	3A	649815141	0.119563677	0.164948454	99	0.029485141	0.05582529	0.048803323	-29.28199375
M92	1A	26426298	0.119769306	0.06185567	99	0.029485141	0.055795627	0.067514582	40.50874909
M11419	5B	536317851	0.119830293	0.432989691	99	0.029485141	0.055786841	0.044663351	26.79801064
M8369	3D	115212017	0.119838998	0.350515464	99	0.029485141	0.055785587	0.036320716	-21.79242938
M10363	5A	357707210	0.119865953	0.402061856	99	0.029485141	0.055781705	0.06510319	39.06191417
M9564	4B	526967219	0.119994424	0.494845361	99	0.029485141	0.055763219	0.053971977	32.38318616
M2800	2A	296758181	0.120008949	0.092783505	99	0.029485141	0.05576113	0.055611541	33.36692443
M12142	6A	6562899	0.120104812	0.041237113	99	0.029485141	0.055747352	0.080402632	48.24157921
M697	1A	491804002	0.120522661	0.463917526	99	0.029485141	0.055687441	0.049694506	-29.81670385
M3136	2A	756929010	0.120638002	0.195876289	99	0.029485141	0.055670945	0.04194504	-25.16702394
M13071	6B	37127862	0.120833515	0.360824742	99	0.029485141	0.055643022	0.070884671	-42.53080256
M6374	3A	32513740	0.121000041	0.154639175	99	0.029485141	0.05561928	0.05130892	-30.7853517
M9581	4B	555219147	0.121004648	0.18556701	99	0.029485141	0.055618623	0.05644312	33.86587193
M14634	7A	156267353	0.121089011	0.206185567	99	0.029485141	0.05560661	0.044988252	26.99295135
M13182	6B	93428436	0.121114714	0.350515464	99	0.029485141	0.055602951	0.038523112	23.11386707
M1549	1B	566170601	0.12124059	0.350515464	99	0.029485141	0.055585048	0.104196456	-62.51787341
M9899	5A	32190209	0.121271373	0.484536082	99	0.029485141	0.055580673	0.055422381	-33.25342832
M9486	4B	103551390	0.121285123	0.474226804	99	0.029485141	0.055578719	0.042804849	-25.68290939
M9004	4A	297888928	0.121331434	0.422680412	99	0.029485141	0.05557214	0.04333359	26.00015395
M3590	2B	38132859	0.121417073	0.257731959	99	0.029485141	0.055559982	0.038266227	22.95973631
M9611	4B	627811268	0.121515978	0.484536082	99	0.029485141	0.055545952	0.048329579	28.9977475
M13003	6B	17701756	0.1215878	0.381443299	99	0.029485141	0.055535772	0.071716452	43.02987103
M1699	1B	615466970	0.121624588	0.494845361	99	0.029485141	0.055530561	0.04529101	-27.17460576
M14285	7A	0	0.121635813	0.195876289	99	0.029485141	0.055528971	0.044250131	-26.55007868
M3630	2B	47668010	0.121724114	0.340206186	99	0.029485141	0.05551647	0.038325402	-22.99524103
M9078	4A	691165574	0.121767238	0.072164948	99	0.029485141	0.055510369	0.061284468	36.77068069
M66	1A	542326485	0.12179574	0.381443299	99	0.029485141	0.055506337	0.073824281	44.29456883
M4338	2B	457674991	0.121815666	0.350515464	99	0.029485141	0.05550352	0.033192836	-19.91570181
M4897	2B	757067597	0.121827373	0.432989691	99	0.029485141	0.055501865	0.040518039	24.31082341
M14537	7A	67066600	0.122093579	0.371134021	99	0.029485141	0.055464276	0.081183404	-48.71004233
M3068	2A	642784267	0.122199099	0.288659794	99	0.029485141	0.055449401	0.036248648	21.74918856
M2978	2A	711050571	0.122225064	0.381443299	99	0.029485141	0.055445743	0.054964899	32.97893917
M303	1A	462698997	0.1224098	0.360824742	99	0.029485141	0.055419744	0.069551562	-41.73093748
M4798	2B	745066666	0.122470214	0.051546392	99	0.029485141	0.055411251	0.070446175	42.26770504
M3826	2B	587422326	0.122487252	0.175257732	99	0.029485141	0.055408857	0.043880915	-26.32854885
M13051	6B	26196316	0.122546042	0.319587629	99	0.029485141	0.055400598	0.063741011	-38.24460686
M6742	3A	716528015	0.122571006	0.494845361	99	0.029485141	0.055397092	0.046597452	-27.95847096
M2240	1D	462074136	0.122776619	0.12371134	99	0.029485141	0.055368249	0.061140455	36.68427307
M13299	6B	520871732	0.122787589	0.371134021	99	0.029485141	0.055366711	0.066987859	40.19271561
M14981	7A	566622348	0.122807946	0.288659794	99	0.029485141	0.055363859	0.042737527	25.64251627
M13504	6B	634330557	0.122872367	0.103092784	99	0.029485141	0.055354836	0.052148214	-31.28892818
M338	1A	3972705	0.122886039	0.020618557	99	0.029485141	0.055352922	0.105885124	63.53107439
M1306	1B	378044898	0.122962228	0.391752577	99	0.029485141	0.055342259	0.036055027	-21.63301602
M13927	6D	14510861	0.122964994	0.340206186	99	0.029485141	0.055341872	0.047605848	-28.5635088
M6015	2D	247051054	0.123052457	0.453608247	99	0.029485141	0.05532964	0.040619038	24.37142268
M14908	7A	690860873	0.123076991	0.020618557	99	0.029485141	0.055326211	0.10488014	62.92808425
M773	1B	89404769	0.123114353	0.195876289	99	0.029485141	0.05532099	0.04489607	-26.93764209
M3104	2A	744493388	0.123121669	0.237113402	99	0.029485141	0.055319968	0.041062021	24.6372127
M13399	6B	597558242	0.12314177	0.432989691	99	0.029485141	0.05531716	0.040622306	24.37338355
M10931	5B	616027146	0.123178487	0.463917526	99	0.029485141	0.055312032	0.04120572	-24.72343196
M1597	1B	400016805	0.123310117	0.484536082	99	0.029485141	0.055293664	0.03657498	21.94498807
M4927	2B	619961495	0.123473331	0.402061856	99	0.029485141	0.055270918	0.038910881	23.34652862
M12668	6A	337842296	0.123705447	0.175257732	99	0.029485141	0.055238629	0.043111313	25.86678794
M4670	2B	576580481	0.12373235	0.154639175	99	0.029485141	0.055234891	0.056067224	-33.64033411
M158	1A	748472420	0.123739309	0.381443299	99	0.029485141	0.055233924	0.04219356	25.31613576
M6169	3A	21325529	0.12375765	0.474226804	99	0.029485141	0.055231376	0.041184239	-24.71054334
M3529	2B	0	0.123787383	0.412371134	99	0.029485141	0.055227247	0.037757043	-22.65422605
M9609	4B	637586800	0.123817415	0.226804124	99	0.029485141	0.055223078	0.040893529	24.53611732
M2356	2A	7028915	0.124013439	0.484536082	99	0.029485141	0.05519589	0.075489378	45.29362704
M13941	6D	24344203	0.124059494	0.453608247	99	0.029485141	0.055189509	0.058591803	35.15508174
M6872	3A	741359064	0.12408539	0.432989691	99	0.029485141	0.055185923	0.053384112	32.03046724
M1516	1B	594654791	0.12417873	0.288659794	99	0.029485141	0.055173002	0.044966245	-26.97974726
M7400	3B	422311619	0.124394827	0.12371134	99	0.029485141	0.055143132	0.054693825	32.81629508
M10997	5B	438110208	0.124437762	0.463917526	99	0.029485141	0.055137204	0.0610062	36.60372008
M10230	5A	534063683	0.1244924	0.381443299	99	0.029485141	0.055129664	0.042756982	25.65418923
M5572	2D	474747710	0.12450225	0.412371134	99	0.029485141	0.055128305	0.034821611	-20.89296666
M10816	5B	418317035	0.124552963	0.402061856	99	0.029485141	0.05512131	0.066286725	-39.77203491
M9054	4A	660462703	0.124558348	0.103092784	99	0.029485141	0.055120567	0.05297981	31.78788593
M12160	6A	0	0.124667412	0.360824742	99	0.029485141	0.055105536	0.090313044	-54.18782666
M12280	6A	14422431	0.124667412	0.360824742	99	0.029485141	0.055105536	0.090313044	-54.18782666
M3563	2B	419250206	0.124686998	0.350515464	99	0.029485141	0.055102838	0.035541119	21.32467168
M6810	3A	0	0.12480824	0.422680412	99	0.029485141	0.055086149	0.050555382	30.33322934
M11558	5B	571321830	0.125055292	0.175257732	99	0.029485141	0.055052198	0.051790086	31.07405189
M2135	1D	537657357	0.125093001	0.24742268	99	0.029485141	0.055047023	0.04979182	29.87509183
M13310	6B	262401776	0.12515863	0.484536082	99	0.029485141	0.05503802	0.041611537	-24.96692205
M1292	1B	394858638	0.125256056	0.082474227	99	0.029485141	0.055024664	0.056748508	34.04910467
M14520	7A	56458797	0.125285509	0.371134021	99	0.029485141	0.055020629	0.040679917	-24.40794997
M5127	2B	221893152	0.125292059	0.402061856	99	0.029485141	0.055019732	0.048312194	-28.98731635
M15114	7A	623342327	0.125355074	0.381443299	99	0.029485141	0.055011102	0.07441002	44.64601222
M9465	4B	14841810	0.125493415	0.216494845	99	0.029485141	0.054992175	0.046098001	27.65880058
M10434	5A	490330792	0.125594451	0.164948454	99	0.029485141	0.054978367	0.044660494	26.79629665
M4285	2B	154233621	0.125619273	0.381443299	99	0.029485141	0.054974977	0.06120787	-36.72472212
M10288	5A	0	0.125635005	0.041237113	99	0.029485141	0.054972828	0.077229638	-46.33778269
M13842	6B	0	0.125709348	0.422680412	99	0.029485141	0.05496268	0.03346429	-20.07857421
M6217	3A	164139970	0.125728005	0.329896907	99	0.029485141	0.054960134	0.038303121	-22.98187241
M10653	5B	48874275	0.12573407	0.134020619	99	0.029485141	0.054959306	0.054979061	-32.98743641
M4833	2B	733169296	0.125766113	0.226804124	99	0.029485141	0.054954935	0.041951645	-25.17098679
M13822	6B	0	0.12589605	0.360824742	99	0.029485141	0.054937223	0.068775386	41.26523182
M5760	2D	593851647	0.125922195	0.360824742	99	0.029485141	0.054933661	0.055500216	-33.3001299
M7102	3B	0	0.125943643	0.082474227	99	0.029485141	0.05493074	0.056266775	-33.76006496
M4675	2B	595508003	0.125946188	0.371134021	99	0.029485141	0.054930394	0.03815426	-22.89255581
M12961	6B	252495	0.125962556	0.402061856	99	0.029485141	0.054928165	0.043953388	-26.3720327
M11926	5D	388791240	0.125995471	0.154639175	99	0.029485141	0.054923684	0.052355952	-31.4135714
M6028	3A	192145005	0.126032786	0.463917526	99	0.029485141	0.054918606	0.051321485	-30.79289102
M13953	6D	95594839	0.126083138	0.010309278	99	0.029485141	0.054911756	0.152889869	91.73392126
M2952	2A	691845663	0.126083138	0.010309278	99	0.029485141	0.054911756	0.152889869	91.73392126
M6116	3A	15451588	0.126208648	0.494845361	99	0.029485141	0.054894695	0.034142825	20.48569511
M5392	2D	0	0.126221261	0.12371134	99	0.029485141	0.054892982	0.047082255	28.24935299
M11619	5B	589463513	0.126236869	0.329896907	99	0.029485141	0.054890862	0.037080093	-22.24805584
M14748	7A	538052365	0.126267486	0.319587629	99	0.029485141	0.054886704	0.035350205	-21.21012299
M15298	7B	138665910	0.12628524	0.113402062	99	0.029485141	0.054884293	0.048752984	-29.25179068
M51	1A	1886980	0.12629253	0.360824742	99	0.029485141	0.054883303	0.049559349	29.73560967
M7048	3B	419044180	0.126624652	0.298969072	99	0.029485141	0.054838284	0.037213698	-22.32821867
M9090	4A	692078422	0.126744208	0.175257732	99	0.029485141	0.05482211	0.041912685	25.14761116
M2304	1D	0	0.126847413	0.103092784	99	0.029485141	0.054808163	0.056363992	33.81839512
M1765	1B	638015288	0.126971408	0.360824742	99	0.029485141	0.054791422	0.0612766	-36.76595998
M2664	2A	120722528	0.127295499	0.278350515	99	0.029485141	0.054747754	0.042186143	25.31168563
M6262	3A	34520561	0.127424186	0.268041237	99	0.029485141	0.05473045	0.052982552	-31.7895313
M13118	6B	26195828	0.127509198	0.453608247	99	0.029485141	0.054719029	0.036497297	21.89837839
M12910	6A	614247742	0.127523558	0.216494845	99	0.029485141	0.054717101	0.044710085	26.82605096
M2251	1D	469542770	0.127563947	0.474226804	99	0.029485141	0.054711679	0.086119916	51.6719499
M9113	4A	701293979	0.127591941	0.402061856	99	0.029485141	0.054707922	0.069420699	-41.65241927
M15584	7B	0	0.127615683	0.422680412	99	0.029485141	0.054704736	0.057837662	-34.70259719
M14472	7A	263797478	0.127622342	0.24742268	99	0.029485141	0.054703843	0.043942324	26.36539412
M3497	2B	15467656	0.127756488	0.494845361	99	0.029485141	0.054685857	0.042339076	-25.40344547
M10572	5B	16185750	0.127914746	0.319587629	99	0.029485141	0.054664665	0.038572996	-23.1437974
M13919	6D	12435844	0.127995652	0.298969072	99	0.029485141	0.054653843	0.045021874	27.01312414
M14088	6D	459382079	0.128070093	0.072164948	99	0.029485141	0.054643893	0.063588983	-38.15338974
M9186	4A	712151623	0.128103904	0.484536082	99	0.029485141	0.054639375	0.057853561	-34.7121368
M14739	7A	346309172	0.128117543	0.484536082	99	0.029485141	0.054637554	0.042683482	25.61008906
M14646	7A	251699115	0.128225118	0.453608247	99	0.029485141	0.054623191	0.045930306	-27.55818381
M14713	7A	449335770	0.128225118	0.453608247	99	0.029485141	0.054623191	0.045930306	-27.55818381
M14733	7A	540872088	0.128225118	0.453608247	99	0.029485141	0.054623191	0.045930306	-27.55818381
M2332	2A	441309055	0.128293703	0.237113402	99	0.029485141	0.054614042	0.051800172	-31.08010296
M2894	2A	30788168	0.128570887	0.329896907	99	0.029485141	0.054577121	0.039510765	-23.70645907
M15146	7A	113229613	0.12869134	0.432989691	99	0.029485141	0.054561105	0.050644322	30.38659313
M12321	6A	141521478	0.128802057	0.288659794	99	0.029485141	0.054546398	0.044134941	-26.48096485
M9870	5A	19590103	0.128936688	0.298969072	99	0.029485141	0.054528534	0.044586014	-26.75160844
M8926	4A	0	0.129500286	0.298969072	99	0.029485141	0.054453979	0.035983284	-21.58997068
M9847	5A	9663258	0.129664716	0.18556701	99	0.029485141	0.054432296	0.051761411	-31.05684673
M12826	6A	605151507	0.129714658	0.371134021	99	0.029485141	0.054425717	0.03712253	22.27351794
M3422	2B	0	0.129785811	0.12371134	99	0.029485141	0.054416348	0.050684766	30.41085986
M8030	3B	41315803	0.129841078	0.360824742	99	0.029485141	0.054409075	0.053269995	-31.96199714
M11594	5B	586531672	0.12990175	0.206185567	99	0.029485141	0.054401095	0.038134201	22.88052058
M6117	3A	15478548	0.129925111	0.474226804	99	0.029485141	0.054398023	0.033398485	20.03909129
M2835	2A	428939693	0.13003796	0.484536082	99	0.029485141	0.054383194	0.047329953	28.39797204
M1253	1B	380772381	0.130060627	0.340206186	99	0.029485141	0.054380218	0.060843874	36.50632427
M14598	7A	94404127	0.130143755	0.443298969	99	0.029485141	0.054369306	0.050846391	-30.50783472
M8995	4A	673930484	0.130232781	0.226804124	99	0.029485141	0.054357628	0.042200906	-25.32054381
M4639	2B	704429297	0.130240473	0.257731959	99	0.029485141	0.05435662	0.036013796	21.60827733
M6812	3A	600135047	0.130295277	0.113402062	99	0.029485141	0.054349436	0.048636664	-29.18199844
M5489	2D	75756578	0.130308967	0.340206186	99	0.029485141	0.054347642	0.087811058	52.68663504
M13376	6B	460540816	0.130316153	0.072164948	99	0.029485141	0.0543467	0.063503874	-38.1023244
M3126	2A	751096174	0.13035264	0.030927835	99	0.029485141	0.054341921	0.090479754	-54.28785211
M3236	2A	0	0.130361459	0.237113402	99	0.029485141	0.054340765	0.048102251	28.86135039
M2903	2A	502932671	0.130385101	0.412371134	99	0.029485141	0.054337669	0.034571954	-20.74317225
M999	1B	58020079	0.13057244	0.443298969	99	0.029485141	0.054313158	0.032966299	19.77977923
M9864	5A	15724613	0.130583636	0.237113402	99	0.029485141	0.054311695	0.041103495	24.66209685
M13957	6D	27675607	0.130674748	0.360824742	99	0.029485141	0.054299789	0.045093786	-27.05627168
M8803	4A	603746270	0.130680906	0.06185567	99	0.029485141	0.054298985	0.078458962	-47.07537715
M5217	2B	0	0.130877451	0.257731959	99	0.029485141	0.054273336	0.038489403	23.09364208
M3562	2B	419250206	0.131034665	0.319587629	99	0.029485141	0.054252851	0.043111754	-25.86705225
M4415	2B	418106383	0.131062936	0.484536082	99	0.029485141	0.054249171	0.041873453	-25.12407178
M992	1B	105260223	0.131118747	0.154639175	99	0.029485141	0.054241907	0.04241427	-25.4485619
M14887	7A	690439160	0.131318525	0.340206186	99	0.029485141	0.054215935	0.041323044	-24.79382663
M1213	1B	111837904	0.131345463	0.309278351	99	0.029485141	0.054212437	0.057005274	34.20316436
M14880	7A	692280965	0.131380914	0.340206186	99	0.029485141	0.054207834	0.085861744	-51.51704649
M9976	5A	593667669	0.131404857	0.463917526	99	0.029485141	0.054204726	0.039001736	23.40104177
M6081	3A	15086099	0.13166308	0.12371134	99	0.029485141	0.054171247	0.059437214	-35.66232837
M1708	1B	580578970	0.131694143	0.494845361	99	0.029485141	0.054167225	0.035862022	21.51721331
M2213	1D	475877262	0.13170725	0.443298969	99	0.029485141	0.054165528	0.043365569	-26.01934115
M2826	2A	502632405	0.131759086	0.103092784	99	0.029485141	0.054158819	0.04982902	-29.89741201
M14821	7A	642899306	0.131777845	0.463917526	99	0.029485141	0.054156392	0.046284887	-27.77093225
M1913	1B	676179014	0.13196138	0.412371134	99	0.029485141	0.054132665	0.043727049	-26.23622965
M3059	2A	731374489	0.131977751	0.402061856	99	0.029485141	0.05413055	0.033603715	20.16222894
M9485	4B	103551390	0.131980595	0.484536082	99	0.029485141	0.054130183	0.040818958	24.49137456
M13853	6D	1414317	0.132169931	0.412371134	99	0.029485141	0.05410575	0.039447016	-23.66820962
M5679	2D	0	0.132231803	0.474226804	99	0.029485141	0.054097774	0.04831608	28.98964792
M11070	5B	502377286	0.132245597	0.474226804	99	0.029485141	0.054095996	0.056444021	33.86641283
M294	1A	779568011	0.132323381	0.164948454	99	0.029485141	0.054085976	0.050745533	-30.44731957
M4640	2B	704429297	0.132354569	0.329896907	99	0.029485141	0.054081961	0.040426211	-24.25572656
M208	1A	327958495	0.13238484	0.268041237	99	0.029485141	0.054078064	0.040473917	24.2843502
M4152	2B	95129435	0.13257309	0.381443299	99	0.029485141	0.054053855	0.060026928	-36.01615704
M3266	2A	773406109	0.132584261	0.092783505	99	0.029485141	0.054052419	0.060010234	36.0061406
M15471	7B	600093011	0.132592877	0.154639175	99	0.029485141	0.054051312	0.043448778	-26.06926652
M14730	7A	493104583	0.132614663	0.494845361	99	0.029485141	0.054048514	0.044580227	26.74813599
M8124	3B	322735845	0.132723629	0.237113402	99	0.029485141	0.054034523	0.037028028	-22.2168169
M13631	6B	691129946	0.132763404	0.443298969	99	0.029485141	0.05402942	0.056615704	33.96942233
M13621	6B	676163297	0.132763404	0.443298969	99	0.029485141	0.05402942	0.056615704	-33.96942233
M6348	3A	478681812	0.132778204	0.381443299	99	0.029485141	0.054027521	0.03806122	-22.83673181
[truncated: 13,601 more rows]
