# Supplementary material for: Genome-wide association study of drought tolerance and biomass allocation in wheat
Source: PLoS One. 2019 Dec 4;14(12):e0225383. doi: 10.1371/journal.pone.0225383 (PMC6892492; doi:10.1371/journal.pone.0225383)
Supplement: S14 Table — (CSV) [file pone.0225383.s014.csv]

SNP	Chromosome	Position	P.value	maf	nobs	Rsquare.of.Model.without.SNP	Rsquare.of.Model.with.SNP	FDR_Adjusted_P-values	effect
M8680	4A	157557592	0.001057085	0.134020619	99	0.076700864	0.192941469	0.04467354	-78.11715262
M2966	2A	705340913	0.001035113	0.360824742	99	0.076700864	0.182481083	0.027491409	-52.06767249
M12545	6A	483543572	0.002356865	0.298969072	99	0.076700864	0.176102969	0.056357388	-55.85063191
M4018	2B	535286874	0.002428736	0.072164948	99	0.076700864	0.175481029	0.024054983	73.29592858
M12659	6A	613833801	0.002484917	0.371134021	99	0.076700864	0.175007993	0.048623711	-50.13682532
M11401	5B	606667462	0.003276131	0.494845361	99	0.076700864	0.169320508	0.164948454	-57.40617558
M4143	2B	380453000	0.00370152	0.412371134	99	0.076700864	0.166826839	0.137457045	-63.8798261
M8914	4A	330012453	0.004266532	0.144329897	99	0.076700864	0.163939398	0.048109966	52.60824949
M8118	3B	800129404	0.004563296	0.020618557	99	0.076700864	0.162578035	0.006872852	-131.0143254
M9051	4A	655256201	0.004956839	0.340206186	99	0.076700864	0.160908139	0.113402062	-177.8326066
M9222	4A	720689979	0.005037527	0.278350515	99	0.076700864	0.160582811	0.092783505	-40.294191
M8164	3B	14991361	0.005572794	0.175257732	99	0.076700864	0.158552953	0.058419244	-49.30852844
M6172	3A	234640908	0.005782819	0.309278351	99	0.076700864	0.157811347	0.103092784	45.2496012
M8736	4A	534555874	0.005799336	0.412371134	99	0.076700864	0.157754219	0.137457045	-38.71294992
M8400	3D	294644099	0.005881398	0.484536082	99	0.076700864	0.157472868	0.161512027	-40.6913632
M1301	1B	0	0.005909306	0.340206186	99	0.076700864	0.157378115	0.113402062	-43.76904056
M8030	3B	41315803	0.006393739	0.360824742	99	0.076700864	0.155803712	0.120274914	-60.02782905
M7478	3B	311762515	0.006615915	0.432989691	99	0.076700864	0.155122719	0.144329897	-58.58152673
M831	1B	15519259	0.006670579	0.319587629	99	0.076700864	0.154958819	0.10652921	59.0405787
M8125	3B	597096465	0.007448503	0.206185567	99	0.076700864	0.152767057	0.687285223	-46.07339961
M10734	5B	205114661	0.007682707	0.18556701	99	0.076700864	0.152153728	1	-51.4732458
M3093	2A	0	0.008398925	0.484536082	99	0.076700864	0.150392443	1	51.50660846
M3513	2B	26998820	0.008407729	0.278350515	99	0.076700864	0.150371781	1	-44.53813182
M13556	6B	670979870	0.008409069	0.494845361	99	0.076700864	0.150368638	1	39.3648404
M11495	5B	589677807	0.008508498	0.010309278	99	0.076700864	0.150136876	1	163.5216595
M14698	7A	512765101	0.008508498	0.010309278	99	0.076700864	0.150136876	1	163.5216595
M11807	5B	691196509	0.008810204	0.144329897	99	0.076700864	0.149450538	1	-48.19893855
M9154	4A	708632121	0.008827041	0.24742268	99	0.076700864	0.149412963	1	42.28736899
M3605	2B	163007189	0.009143884	0.422680412	99	0.076700864	0.148719467	1	-35.05537548
M8662	4A	176342807	0.009216019	0.216494845	99	0.076700864	0.148565087	1	-53.78200774
M3501	2B	0	0.009322246	0.268041237	99	0.076700864	0.148340026	1	-43.96274926
M1408	1B	512275631	0.009343439	0.402061856	99	0.076700864	0.148295444	1	38.68373586
M9608	4B	637622767	0.009373005	0.226804124	99	0.076700864	0.148233427	1	-45.55560898
M9428	4A	733792535	0.009573836	0.329896907	99	0.076700864	0.147817495	1	-46.11764462
M12595	6A	550966287	0.009765695	0.298969072	99	0.076700864	0.14742857	1	46.02216076
M8769	4A	597058372	0.00977735	0.12371134	99	0.076700864	0.147405201	1	50.84955915
M10752	5B	382080961	0.009802874	0.474226804	99	0.076700864	0.147354127	1	-49.2744408
M14396	7A	28554017	0.009860162	0.443298969	99	0.076700864	0.147239995	1	41.84454207
M8540	4A	17023815	0.010280325	0.216494845	99	0.076700864	0.146423521	1	47.12014147
M6230	3A	563120760	0.010722579	0.432989691	99	0.076700864	0.14560096	1	36.77191718
M3523	2B	14970956	0.010788455	0.402061856	99	0.076700864	0.145481479	1	44.12352731
M8468	3D	689501546	0.010886038	0.340206186	99	0.076700864	0.145305882	1	-91.37741379
M14611	7A	106411744	0.011096948	0.030927835	99	0.076700864	0.14493192	1	-90.41710698
M8448	3D	537339977	0.011175846	0.391752577	99	0.076700864	0.144793933	1	-37.62588251
M579	1A	565296725	0.011254178	0.422680412	99	0.076700864	0.14465794	1	42.38415313
M1288	1B	462987278	0.011345038	0.072164948	99	0.076700864	0.144501433	1	62.31853181
M9216	4A	720887655	0.011401949	0.237113402	99	0.076700864	0.14440407	1	-43.49440423
M9848	5A	9663258	0.011491208	0.453608247	99	0.076700864	0.144252385	1	43.61616136
M14454	7A	38241544	0.011592352	0.309278351	99	0.076700864	0.144081986	1	49.86655954
M8306	3D	19553185	0.011653045	0.474226804	99	0.076700864	0.143980481	1	-34.5222979
M10755	5B	383209422	0.01181583	0.113402062	99	0.076700864	0.143710941	1	-80.01374138
M1710	1B	629304211	0.011896771	0.474226804	99	0.076700864	0.143578362	1	37.0682511
M4525	2B	547273650	0.012056599	0.350515464	99	0.076700864	0.143319317	1	73.70919407
M6551	3A	647019881	0.012077466	0.484536082	99	0.076700864	0.143285763	1	48.00686408
M13834	6B	471568711	0.012094684	0.494845361	99	0.076700864	0.143258122	1	56.9662523
M13166	6B	109155311	0.01224323	0.041237113	99	0.076700864	0.143021343	1	79.58676961
M3550	2B	28998601	0.012431784	0.453608247	99	0.076700864	0.142725091	1	-40.02876543
M8974	4A	681683099	0.012460438	0.24742268	99	0.076700864	0.142680482	1	-41.09197672
M9212	4A	9824444	0.012890817	0.103092784	99	0.076700864	0.142023101	1	-59.2144916
M10079	5A	467370058	0.013112589	0.216494845	99	0.076700864	0.141693276	1	44.15916427
M8689	4A	478992616	0.013166633	0.257731959	99	0.076700864	0.141613785	1	-47.50189516
M15432	7B	556686638	0.013319718	0.072164948	99	0.076700864	0.141390464	1	-72.59483857
M221	1A	0	0.013486243	0.381443299	99	0.076700864	0.14115057	1	41.39362151
M12635	6A	634308110	0.013738017	0.319587629	99	0.076700864	0.140793701	1	-46.69037741
M9592	4B	647387447	0.013827644	0.195876289	99	0.076700864	0.140668314	1	-48.16851246
M2974	2A	541992663	0.013881453	0.340206186	99	0.076700864	0.140593445	1	-35.73403009
M8451	3D	543684499	0.014450793	0.463917526	99	0.076700864	0.139819421	1	-49.13693309
M3346	2A	767310246	0.014596665	0.412371134	99	0.076700864	0.13962625	1	-32.77727464
M6114	3A	32420986	0.01461438	0.494845361	99	0.076700864	0.139602929	1	37.23650417
M1292	1B	394858638	0.014639412	0.082474227	99	0.076700864	0.139570026	1	-56.52429197
M14368	7A	20403281	0.014750379	0.340206186	99	0.076700864	0.139424875	1	-70.36867061
M8529	4A	11986460	0.014961798	0.484536082	99	0.076700864	0.139151469	1	51.56405646
M15323	7B	337120635	0.01500782	0.319587629	99	0.076700864	0.139092492	1	37.99340759
M9200	4A	50748255	0.015045259	0.010309278	99	0.076700864	0.139044653	1	-159.0886151
M11338	5B	68317422	0.015153844	0.113402062	99	0.076700864	0.138906609	1	57.86484768
M1337	1B	380472532	0.015239101	0.463917526	99	0.076700864	0.138798947	1	32.77595481
M13790	6B	469537832	0.015391612	0.329896907	99	0.076700864	0.138607926	1	76.0512162
M8513	3D	361872130	0.015472885	0.463917526	99	0.076700864	0.138506941	1	-49.92253663
M4753	2B	600038125	0.015515697	0.474226804	99	0.076700864	0.138453968	1	-36.51880661
M5655	2D	142549111	0.01570933	0.340206186	99	0.076700864	0.138216284	1	-44.3404551
M12665	6A	194187915	0.015916429	0.268041237	99	0.076700864	0.137965452	1	-41.6665436
M9030	4A	48707567	0.016007102	0.432989691	99	0.076700864	0.137856708	1	-36.60827485
M8193	3B	818284655	0.016048948	0.422680412	99	0.076700864	0.13780674	1	49.07683414
M12735	6A	594854466	0.01608503	0.195876289	99	0.076700864	0.137763765	1	-40.15648096
M11389	5B	437451308	0.01614923	0.371134021	99	0.076700864	0.137687549	1	-34.35202158
M9221	4A	720689979	0.016238497	0.278350515	99	0.076700864	0.137582103	1	44.85118559
M2275	1D	676009151	0.016470602	0.154639175	99	0.076700864	0.137310755	1	46.9607414
M5776	2D	590146863	0.016532373	0.206185567	99	0.076700864	0.137239216	1	-42.15799621
M7894	3B	211212780	0.016603173	0.164948454	99	0.076700864	0.137157565	1	-40.68672377
M2970	2A	703879878	0.016625749	0.453608247	99	0.076700864	0.137131607	1	51.74297932
M4856	2B	746141190	0.01677737	0.175257732	99	0.076700864	0.13695822	1	-44.7791277
M6269	3A	52210548	0.016917677	0.443298969	99	0.076700864	0.136799232	1	35.59380981
M3999	2B	213709998	0.016919054	0.298969072	99	0.076700864	0.136797678	1	-33.21588251
M8406	3D	305622118	0.01701926	0.298969072	99	0.076700864	0.136684987	1	33.61453833
M8530	4A	11986460	0.017047179	0.360824742	99	0.076700864	0.136653712	1	33.33434246
M1176	1B	86948109	0.017062319	0.030927835	99	0.076700864	0.136636777	1	-85.74200521
M13954	6D	95594839	0.017091247	0.381443299	99	0.076700864	0.136604459	1	-42.12193739
M10151	5A	487755156	0.017184863	0.484536082	99	0.076700864	0.136500268	1	-39.47504596
M9616	4B	630378256	0.017281851	0.494845361	99	0.076700864	0.136392953	1	-50.69452294
M12205	6A	11590739	0.017535157	0.12371134	99	0.076700864	0.136115633	1	54.09609042
M8747	4A	571483237	0.017911805	0.494845361	99	0.076700864	0.135710973	1	-49.72804973
M8351	3D	42633957	0.018051323	0.494845361	99	0.076700864	0.135563346	1	-39.91072735
M1298	1B	65947056	0.018227191	0.164948454	99	0.076700864	0.135378957	1	-46.60192813
M5949	2D	774840471	0.018606738	0.092783505	99	0.076700864	0.13498732	1	-56.12019947
M1119	1B	39854453	0.018823769	0.432989691	99	0.076700864	0.134767138	1	-47.05254133
M6533	3A	643546998	0.018827372	0.422680412	99	0.076700864	0.134763505	1	-45.49713644
M9625	4B	652962151	0.019054825	0.443298969	99	0.076700864	0.134535644	1	33.2899733
M7993	3B	763055436	0.019090388	0.381443299	99	0.076700864	0.134500276	1	-38.45570922
M278	1A	376476439	0.019133852	0.319587629	99	0.076700864	0.134457145	1	-83.62663252
M10335	5A	565398435	0.019441713	0.453608247	99	0.076700864	0.134154562	1	46.05115055
M13520	6B	643863993	0.019611098	0.24742268	99	0.076700864	0.133990226	1	-41.32691369
M15580	7B	647131014	0.019617031	0.06185567	99	0.076700864	0.133984497	1	60.70268004
M9850	5A	27470847	0.019847971	0.237113402	99	0.076700864	0.133762903	1	-41.66358867
M3317	2A	795754294	0.019864297	0.206185567	99	0.076700864	0.133747341	1	42.35212133
M6405	3A	541482839	0.020057879	0.257731959	99	0.076700864	0.133563834	1	40.00325652
M268	1A	339927631	0.020063351	0.030927835	99	0.076700864	0.133558674	1	-82.21663113
M11307	5B	75690287	0.02024605	0.360824742	99	0.076700864	0.133387237	1	93.76848373
M11962	5D	531606683	0.020246708	0.463917526	99	0.076700864	0.133386623	1	35.18199869
M9047	4A	654345599	0.020468035	0.463917526	99	0.076700864	0.133181116	1	43.86980392
M3301	2A	0	0.02050163	0.412371134	99	0.076700864	0.133150127	1	37.65619965
M6763	3A	780291542	0.020630846	0.072164948	99	0.076700864	0.133031433	1	56.73448725
M3697	2B	68756048	0.020676321	0.103092784	99	0.076700864	0.132989846	1	-48.32243912
M11229	5B	528891865	0.020682969	0.381443299	99	0.076700864	0.132983775	1	-38.19495703
M5768	2D	26003239	0.020705798	0.484536082	99	0.076700864	0.132962942	1	-49.2530185
M601	1A	566369413	0.020841115	0.329896907	99	0.076700864	0.13283995	1	35.05007081
M15458	7B	0	0.020976753	0.268041237	99	0.076700864	0.132717508	1	-36.07815157
M8562	4A	79043071	0.021100905	0.443298969	99	0.076700864	0.132606164	1	43.53560777
M11869	5B	612532049	0.021257873	0.154639175	99	0.076700864	0.132466374	1	42.25492854
M3595	2B	506395762	0.021304526	0.412371134	99	0.076700864	0.132425036	1	38.17654423
M14699	7A	514434830	0.021445963	0.340206186	99	0.076700864	0.132300295	1	137.6169408
M8872	4A	41774493	0.021445963	0.340206186	99	0.076700864	0.132300295	1	137.6169408
M9667	4B	30330500	0.021520501	0.402061856	99	0.076700864	0.132234904	1	46.36078249
M1868	1B	478156609	0.021636698	0.329896907	99	0.076700864	0.132133442	1	-38.17843583
M6305	3A	52962542	0.021670888	0.18556701	99	0.076700864	0.132103697	1	-40.97769757
M6268	3A	41617458	0.021774067	0.195876289	99	0.076700864	0.132014231	1	-42.6509657
M1753	1B	636316329	0.022243942	0.051546392	99	0.076700864	0.131612386	1	64.85257364
M8498	3D	600173800	0.022920159	0.319587629	99	0.076700864	0.131049528	1	-33.86847416
M10738	5B	43437349	0.022989668	0.051546392	99	0.076700864	0.130992667	1	-80.09138323
M14951	7A	701621418	0.023108365	0.474226804	99	0.076700864	0.130895989	1	39.1481834
M8566	4A	318817830	0.023115021	0.103092784	99	0.076700864	0.130890583	1	-47.75541052
M3006	2A	709730810	0.023148419	0.257731959	99	0.076700864	0.130863483	1	34.69305194
M10049	5A	475372989	0.023232736	0.06185567	99	0.076700864	0.130795249	1	58.00923426
M3548	2B	0	0.023285223	0.474226804	99	0.076700864	0.130752906	1	38.44392946
M1696	1B	614393199	0.023361641	0.206185567	99	0.076700864	0.130691436	1	-35.82992984
M3972	2B	128269909	0.02344322	0.443298969	99	0.076700864	0.130626049	1	31.90240856
M8578	4A	47648562	0.023645638	0.257731959	99	0.076700864	0.130464841	1	38.28177632
M5658	2D	579761048	0.023706376	0.051546392	99	0.076700864	0.130416752	1	62.70389284
M8460	3D	554065026	0.023848726	0.288659794	99	0.076700864	0.130304557	1	40.01909986
M8469	3D	562529915	0.023993345	0.453608247	99	0.076700864	0.130191295	1	-44.20473095
M9164	4A	348257403	0.024089439	0.103092784	99	0.076700864	0.130116435	1	47.09542111
M15360	7B	270952860	0.024422972	0.391752577	99	0.076700864	0.129859032	1	-30.98096235
M7531	3B	550313136	0.024507917	0.412371134	99	0.076700864	0.129794069	1	-35.31247883
M8605	4A	67350278	0.025057262	0.443298969	99	0.076700864	0.129379614	1	-36.88086526
M8570	4A	80174184	0.025095897	0.432989691	99	0.076700864	0.129350829	1	-41.19929295
M7860	3B	559227303	0.025139296	0.18556701	99	0.076700864	0.12931855	1	-38.62117849
M8569	4A	80174184	0.025344722	0.216494845	99	0.076700864	0.129166552	1	-40.75602011
M11339	5B	527931318	0.025489564	0.350515464	99	0.076700864	0.129060164	1	76.79019864
M10078	5A	474478884	0.025500293	0.484536082	99	0.076700864	0.129052308	1	54.17360953
M14181	7A	12011036	0.025642209	0.092783505	99	0.076700864	0.128948733	1	-49.10935492
M9205	4A	714142331	0.025663358	0.432989691	99	0.076700864	0.12893335	1	55.19438485
M6115	3A	15451588	0.025678451	0.268041237	99	0.076700864	0.12892238	1	36.10768832
M3592	2B	33729356	0.025743751	0.298969072	99	0.076700864	0.128874997	1	32.84374812
M11436	5B	0	0.025980897	0.216494845	99	0.076700864	0.128703979	1	37.97069189
M2509	2A	51108076	0.026274627	0.474226804	99	0.076700864	0.128494432	1	34.32266336
M9171	4A	709851770	0.026640976	0.484536082	99	0.076700864	0.128236526	1	-50.00426322
M8166	3B	434275633	0.026876724	0.443298969	99	0.076700864	0.128072541	1	45.89311398
M5348	2B	797272925	0.026993326	0.371134021	99	0.076700864	0.127991994	1	84.21921863
M4427	2B	639518720	0.026993326	0.371134021	99	0.076700864	0.127991994	1	-84.21921863
M13559	6B	593285120	0.027146686	0.309278351	99	0.076700864	0.127886616	1	36.08782105
M3357	2A	766039959	0.027330318	0.432989691	99	0.076700864	0.127761263	1	31.42414401
M8472	3D	564308399	0.027387206	0.020618557	99	0.076700864	0.127722611	1	95.05696501
M8486	3D	575631870	0.027387206	0.020618557	99	0.076700864	0.127722611	1	-95.05696501
M8877	4A	631914750	0.027387206	0.020618557	99	0.076700864	0.127722611	1	-95.05696501
M9089	4A	692078422	0.027389155	0.443298969	99	0.076700864	0.127721288	1	47.80094683
M1297	1B	65947056	0.027473281	0.432989691	99	0.076700864	0.127664288	1	42.85632093
M3974	2B	159604259	0.027639139	0.360824742	99	0.076700864	0.127552451	1	36.53288057
M12616	6A	560836177	0.027809353	0.340206186	99	0.076700864	0.127438413	1	124.6124875
M15369	7B	451485910	0.027835554	0.288659794	99	0.076700864	0.127420925	1	31.05818664
M3327	2A	761319429	0.0280177	0.443298969	99	0.076700864	0.12729983	1	-39.09124514
M9925	5A	0	0.028065259	0.360824742	99	0.076700864	0.127268349	1	-61.16980153
M5549	2D	130133036	0.028160584	0.402061856	99	0.076700864	0.12720542	1	-35.14127292
M12154	6A	2036040	0.028402654	0.134020619	99	0.076700864	0.127046626	1	47.97899013
M8361	3D	58370125	0.028542099	0.474226804	99	0.076700864	0.126955802	1	41.84815401
M4022	2B	535286874	0.028719697	0.484536082	99	0.076700864	0.126840807	1	-33.25353128
M3911	2B	63622881	0.028741523	0.360824742	99	0.076700864	0.126826726	1	48.81732124
M8453	3D	509370071	0.028787124	0.494845361	99	0.076700864	0.126797345	1	-44.32858982
M9780	4D	455472305	0.02885905	0.402061856	99	0.076700864	0.126751102	1	47.28428555
M10118	5A	742010724	0.028904387	0.113402062	99	0.076700864	0.126722017	1	-69.91326733
M10038	5A	445275979	0.028904387	0.113402062	99	0.076700864	0.126722017	1	69.91326733
M11559	5B	571321830	0.029033003	0.206185567	99	0.076700864	0.126639767	1	-38.26904882
M9782	4D	446124259	0.029063911	0.12371134	99	0.076700864	0.126620059	1	-40.5071573
M8655	4A	330085918	0.029109323	0.195876289	99	0.076700864	0.126591143	1	-46.12578671
M11853	5B	696426421	0.029161259	0.24742268	99	0.076700864	0.126558132	1	41.26551013
M9316	4A	336207656	0.029192442	0.072164948	99	0.076700864	0.126538341	1	-62.68739449
M751	1B	12605308	0.029530045	0.463917526	99	0.076700864	0.126325503	1	44.82514086
M14555	7A	80567712	0.029755956	0.319587629	99	0.076700864	0.126184517	1	52.83517527
M12834	6A	605232661	0.029786879	0.164948454	99	0.076700864	0.126165307	1	-40.88782576
M1377	1B	471174490	0.030064557	0.453608247	99	0.076700864	0.12599375	1	28.7310381
M2902	2A	476277816	0.030065664	0.309278351	99	0.076700864	0.125993069	1	-32.83270945
M3423	2B	11189847	0.030119178	0.020618557	99	0.076700864	0.125960202	1	-99.76595946
M8656	4A	330085918	0.030192458	0.463917526	99	0.076700864	0.125915294	1	-51.78392663
M14058	6D	682135943	0.030668963	0.463917526	99	0.076700864	0.125626075	1	-33.13506582
M6886	3B	0	0.030717747	0.371134021	99	0.076700864	0.125596735	1	31.20887529
M8723	4A	36222671	0.030777846	0.226804124	99	0.076700864	0.125560657	1	-47.44318331
M9375	4A	733921790	0.030805909	0.432989691	99	0.076700864	0.125543836	1	32.92693474
M8435	3D	523552116	0.030857981	0.360824742	99	0.076700864	0.125512668	1	-33.68403451
M10037	5A	445275979	0.031018347	0.494845361	99	0.076700864	0.125417029	1	47.64681394
M10773	5B	373077326	0.031299614	0.12371134	99	0.076700864	0.125250547	1	47.45452962
M1323	1B	30723633	0.031322709	0.453608247	99	0.076700864	0.125236948	1	42.09456866
M6319	3A	434822187	0.031581065	0.216494845	99	0.076700864	0.12508554	1	36.11496501
M1914	1B	676179014	0.031653765	0.298969072	99	0.076700864	0.125043172	1	-41.57555808
M9126	4A	236257343	0.031857308	0.422680412	99	0.076700864	0.124925099	1	52.30127068
M9056	4A	687327397	0.031865431	0.453608247	99	0.076700864	0.124920404	1	-42.83208549
M2815	2A	0	0.031880626	0.494845361	99	0.076700864	0.124911623	1	38.77452341
M930	1B	101527533	0.032164393	0.041237113	99	0.076700864	0.12474847	1	-68.98395949
M174	1A	36555131	0.032262127	0.432989691	99	0.076700864	0.124692632	1	30.5332761
M11332	5B	0	0.032716122	0.103092784	99	0.076700864	0.124435585	1	46.39991214
M1968	1D	436889059	0.03297069	0.371134021	99	0.076700864	0.124293106	1	36.22749074
M6428	3A	517095336	0.033057373	0.463917526	99	0.076700864	0.124244858	1	-41.97188884
M5246	2B	796600262	0.033135746	0.051546392	99	0.076700864	0.12420135	1	59.14117007
M5288	2B	0	0.033135746	0.051546392	99	0.076700864	0.12420135	1	59.14117007
M5612	2D	231460780	0.033201711	0.371134021	99	0.076700864	0.124164815	1	35.14119883
M5119	2B	37969341	0.033234698	0.391752577	99	0.076700864	0.124146575	1	-35.15891413
M8090	3B	795540049	0.033261602	0.443298969	99	0.076700864	0.124131712	1	44.58890143
M3498	2B	15467656	0.033273798	0.443298969	99	0.076700864	0.124124978	1	31.32602669
M15182	7B	27599460	0.033312234	0.195876289	99	0.076700864	0.124103775	1	-38.96083814
M1121	1B	39854453	0.03351375	0.309278351	99	0.076700864	0.123993032	1	49.87679973
M7893	3B	211212780	0.033552156	0.298969072	99	0.076700864	0.123972007	1	61.03985654
M4059	2B	155155728	0.033621599	0.484536082	99	0.076700864	0.123934055	1	34.62892666
M8502	3D	429704139	0.033632776	0.391752577	99	0.076700864	0.123927954	1	44.16062738
M401	1A	939984	0.033654928	0.371134021	99	0.076700864	0.12391587	1	30.85021837
M6106	3A	283594306	0.033971716	0.237113402	99	0.076700864	0.123743971	1	35.20652577
M9775	4D	442739513	0.034067437	0.494845361	99	0.076700864	0.123692366	1	40.5944045
M10192	5A	478372444	0.034077553	0.329896907	99	0.076700864	0.123686921	1	-35.19907919
M15252	7B	63002454	0.034148458	0.484536082	99	0.076700864	0.123648805	1	-38.67588717
M8823	4A	612096350	0.03439857	0.082474227	99	0.076700864	0.123515026	1	49.04737335
M8787	4A	599469214	0.034430602	0.402061856	99	0.076700864	0.123497968	1	-54.94983876
M9147	4A	22270015	0.034480887	0.463917526	99	0.076700864	0.123471223	1	-48.34308124
M8679	4A	157557592	0.034535628	0.092783505	99	0.076700864	0.123442155	1	-51.88664941
M625	1A	481551847	0.034698898	0.391752577	99	0.076700864	0.123355749	1	-32.26457043
M8286	3D	9312378	0.034870196	0.360824742	99	0.076700864	0.123265557	1	-74.83507265
M9240	4A	727965119	0.035665855	0.350515464	99	0.076700864	0.122852725	1	-33.07729218
M9217	4A	726716286	0.035671599	0.474226804	99	0.076700864	0.122849781	1	-48.01308364
M1289	1B	392530020	0.035742436	0.144329897	99	0.076700864	0.12281351	1	37.16532613
M13554	6B	38658891	0.035755262	0.412371134	99	0.076700864	0.12280695	1	41.46774603
M7532	3B	550313136	0.035813939	0.134020619	99	0.076700864	0.122776975	1	41.52348662
M12631	6A	0	0.036108285	0.309278351	99	0.076700864	0.122627391	1	34.96464789
M1139	1B	57477371	0.03615133	0.030927835	99	0.076700864	0.122605625	1	75.02121653
M3575	2B	33729208	0.036371435	0.422680412	99	0.076700864	0.122494757	1	36.44578409
M10176	5A	472070401	0.036381694	0.494845361	99	0.076700864	0.122489608	1	-43.37853284
M422	1A	500980788	0.036520494	0.432989691	99	0.076700864	0.122420081	1	-31.45846199
M3988	2B	159210768	0.036772307	0.072164948	99	0.076700864	0.122294662	1	50.36645686
M12602	6A	540143428	0.036792011	0.010309278	99	0.076700864	0.122284887	1	-125.8920763
M4124	2B	581433203	0.036830823	0.329896907	99	0.076700864	0.122265648	1	-55.3594548
M15053	7A	455967223	0.036834194	0.092783505	99	0.076700864	0.122263978	1	-54.17625322
M12895	6A	0	0.037223667	0.278350515	99	0.076700864	0.12207213	1	41.98800521
M2107	1D	372222094	0.037338936	0.453608247	99	0.076700864	0.122015761	1	37.10884203
M9836	5A	5650428	0.037351958	0.391752577	99	0.076700864	0.122009404	1	27.32715496
M1676	1B	625466708	0.037486202	0.484536082	99	0.076700864	0.121944013	1	-39.89161841
M3482	2B	12913977	0.03790508	0.278350515	99	0.076700864	0.12174157	1	34.93868235
M12497	6A	421534410	0.038055552	0.371134021	99	0.076700864	0.121669429	1	-36.22811813
M9575	4B	15752078	0.03816473	0.474226804	99	0.076700864	0.121617276	1	-38.54575827
M1364	1B	509798209	0.038166465	0.298969072	99	0.076700864	0.121616448	1	35.94851524
M15114	7A	623342327	0.03819743	0.381443299	99	0.076700864	0.121601687	1	62.43997433
M4374	2B	446932626	0.03823556	0.494845361	99	0.076700864	0.121583527	1	38.4084034
M8004	3B	0	0.038345112	0.051546392	99	0.076700864	0.121531457	1	58.66822751
M9687	4B	0	0.038501739	0.340206186	99	0.076700864	0.12145729	1	28.90742001
M4055	2B	0	0.038516333	0.195876289	99	0.076700864	0.121450396	1	-34.01977859
M2999	2A	713536628	0.038539794	0.422680412	99	0.076700864	0.121439318	1	-40.55382731
M15348	7B	157808881	0.038560119	0.103092784	99	0.076700864	0.121429727	1	43.39773786
M3149	2A	569979056	0.038690943	0.237113402	99	0.076700864	0.121368124	1	-40.16401466
M2265	1D	482503736	0.038833788	0.463917526	99	0.076700864	0.121301113	1	32.79759251
M4029	2B	202155886	0.038951294	0.474226804	99	0.076700864	0.121246187	1	-37.48642772
M8785	4A	596971035	0.039226844	0.072164948	99	0.076700864	0.121118075	1	52.68653981
M5257	2B	765373126	0.039267165	0.092783505	99	0.076700864	0.121099409	1	-46.7087549
M5633	2D	297509224	0.039564734	0.319587629	99	0.076700864	0.120962285	1	35.59600773
M2980	2A	710269269	0.039991535	0.278350515	99	0.076700864	0.12076752	1	-36.15750174
M12567	6A	537944558	0.040124746	0.340206186	99	0.076700864	0.120707185	1	-36.99877306
M1338	1B	380472532	0.040270502	0.402061856	99	0.076700864	0.120641413	1	-33.1414684
M4039	2B	236170471	0.040388647	0.195876289	99	0.076700864	0.120588287	1	-36.64279472
M1414	1B	0	0.040418888	0.164948454	99	0.076700864	0.120574715	1	-40.87497472
M6261	3A	34520561	0.040423962	0.216494845	99	0.076700864	0.12057244	1	33.55583599
M10815	5B	418317035	0.040534109	0.020618557	99	0.076700864	0.120523105	1	91.00101519
M1118	1B	602172778	0.040534109	0.020618557	99	0.076700864	0.120523105	1	91.00101519
M1208	1B	11614042	0.040534109	0.020618557	99	0.076700864	0.120523105	1	91.00101519
M1210	1B	357640984	0.040534109	0.020618557	99	0.076700864	0.120523105	1	91.00101519
M1134	1B	0	0.040534109	0.020618557	99	0.076700864	0.120523105	1	-91.00101519
M1261	1B	316600988	0.040534109	0.020618557	99	0.076700864	0.120523105	1	-91.00101519
M11961	5D	531606683	0.040593882	0.443298969	99	0.076700864	0.120496393	1	-31.72161244
M8677	4A	374355718	0.040607694	0.257731959	99	0.076700864	0.120490227	1	-34.32247392
M5128	2B	221893152	0.040673857	0.144329897	99	0.076700864	0.120460719	1	36.6168035
M8965	4A	328716746	0.040881226	0.494845361	99	0.076700864	0.120368566	1	47.47334125
M13836	6B	0	0.040934668	0.278350515	99	0.076700864	0.120344897	1	29.4200313
M9720	4D	580089641	0.040963405	0.298969072	99	0.076700864	0.120332184	1	35.1640373
M9752	4D	64710758	0.040963405	0.298969072	99	0.076700864	0.120332184	1	-35.1640373
M11079	5B	505694656	0.04097437	0.288659794	99	0.076700864	0.120327336	1	38.7745625
M4815	2B	732342408	0.041049431	0.360824742	99	0.076700864	0.120294183	1	-79.53440623
M977	1B	714373153	0.041062419	0.268041237	99	0.076700864	0.120288453	1	44.90322509
M11989	5D	551446740	0.041090138	0.257731959	99	0.076700864	0.120276231	1	36.05369029
M2937	2A	507377226	0.041192723	0.237113402	99	0.076700864	0.120231074	1	41.68734809
M11932	5D	424046570	0.041309959	0.257731959	99	0.076700864	0.120179615	1	41.9696879
M9904	5A	36740586	0.041434747	0.422680412	99	0.076700864	0.120125012	1	41.90586677
M9287	4A	51243538	0.041655425	0.422680412	99	0.076700864	0.12002888	1	-47.65582226
M12600	6A	57659058	0.041762733	0.350515464	99	0.076700864	0.119982331	1	36.88943104
M3191	2A	72169399	0.041802582	0.051546392	99	0.076700864	0.119965078	1	56.21531515
M1814	1B	656450092	0.041804525	0.453608247	99	0.076700864	0.119964237	1	-46.01813458
M15471	7B	600093011	0.041844607	0.154639175	99	0.076700864	0.119946902	1	-36.32981902
M11955	5D	542494684	0.041930181	0.422680412	99	0.076700864	0.11990995	1	-44.30182108
M8687	4A	478992616	0.042017634	0.329896907	99	0.076700864	0.11987227	1	64.10253807
M542	1A	123811534	0.042277395	0.432989691	99	0.076700864	0.119760842	1	34.96580726
M8379	3D	75963605	0.042284857	0.309278351	99	0.076700864	0.119757652	1	-30.16387844
M13557	6B	660491055	0.042501879	0.422680412	99	0.076700864	0.119665136	1	-42.02038844
M8667	4A	146943997	0.042589121	0.340206186	99	0.076700864	0.119628087	1	-30.49640426
M11147	5B	529048297	0.042814796	0.257731959	99	0.076700864	0.119532625	1	32.0753986
M1333	1B	470907649	0.043118598	0.360824742	99	0.076700864	0.119404962	1	47.89316758
M2803	2A	109064436	0.043177842	0.24742268	99	0.076700864	0.119380179	1	-30.11647567
M9902	5A	104616943	0.043234083	0.484536082	99	0.076700864	0.119356686	1	-33.52144747
M9747	4D	65113876	0.043289959	0.412371134	99	0.076700864	0.119333378	1	48.2413634
M9723	4D	1206063	0.04329362	0.422680412	99	0.076700864	0.119331852	1	26.71475064
M8117	3B	800129404	0.043371805	0.422680412	99	0.076700864	0.119299294	1	-45.39922081
M9184	4A	707676969	0.043446662	0.474226804	99	0.076700864	0.119268181	1	-44.57223835
M2833	2A	177899477	0.043459792	0.12371134	99	0.076700864	0.11926273	1	45.47632202
M12831	6A	604445823	0.043511704	0.309278351	99	0.076700864	0.119241195	1	65.2578265
M13550	6B	664092873	0.043540827	0.432989691	99	0.076700864	0.119229125	1	-30.63556693
M10623	5B	470106533	0.043675349	0.113402062	99	0.076700864	0.119173487	1	43.53018752
M1272	1B	104575954	0.043728756	0.288659794	99	0.076700864	0.119151448	1	35.25651217
M1278	1B	379091249	0.043839472	0.340206186	99	0.076700864	0.119105853	1	-76.75372829
M7358	3B	120598030	0.043919154	0.422680412	99	0.076700864	0.119073115	1	50.0105346
M11366	5B	196255936	0.044193567	0.072164948	99	0.076700864	0.118960854	1	-53.37796591
M2901	2A	476277816	0.044541331	0.381443299	99	0.076700864	0.118819653	1	-32.6896263
M10369	5A	568264305	0.044560444	0.432989691	99	0.076700864	0.118811927	1	35.98730824
M8556	4A	137524931	0.044678568	0.237113402	99	0.076700864	0.118764256	1	-31.75286544
M5504	2D	120581522	0.044699464	0.360824742	99	0.076700864	0.118755838	1	-31.71984737
M5359	2D	2727249	0.044767392	0.381443299	99	0.076700864	0.118728499	1	66.36274797
M8728	4A	90891330	0.04488827	0.309278351	99	0.076700864	0.11867996	1	36.73934491
M9569	4B	469073230	0.044901251	0.494845361	99	0.076700864	0.118674755	1	45.00165624
M2282	1D	494063368	0.044986972	0.432989691	99	0.076700864	0.118640429	1	40.57452914
M11373	5B	620654423	0.045087104	0.082474227	99	0.076700864	0.118600421	1	45.73099514
M645	1A	584104138	0.045146838	0.340206186	99	0.076700864	0.118576599	1	26.00537426
M8169	3B	815282731	0.045173953	0.443298969	99	0.076700864	0.118565797	1	34.79186719
M9633	4B	0	0.0453404	0.237113402	99	0.076700864	0.118499638	1	30.10875403
M4679	2B	0	0.045429767	0.402061856	99	0.076700864	0.118464225	1	-34.63137472
M961	1B	499209336	0.045664294	0.144329897	99	0.076700864	0.118371642	1	-38.64273369
M13248	6B	178019384	0.045700151	0.268041237	99	0.076700864	0.118357532	1	28.48396615
M8471	3D	564308399	0.045785214	0.350515464	99	0.076700864	0.118324106	1	84.65607105
M8715	4A	529002213	0.045785214	0.350515464	99	0.076700864	0.118324106	1	84.65607105
M8727	4A	90891330	0.045785214	0.350515464	99	0.076700864	0.118324106	1	84.65607105
M8799	4A	602863944	0.045785214	0.350515464	99	0.076700864	0.118324106	1	84.65607105
M8879	4A	678526678	0.045785214	0.350515464	99	0.076700864	0.118324106	1	84.65607105
M8604	4A	5349394	0.045785214	0.350515464	99	0.076700864	0.118324106	1	-84.65607105
M8707	4A	538895420	0.045785214	0.350515464	99	0.076700864	0.118324106	1	-84.65607105
M8752	4A	0	0.045785214	0.350515464	99	0.076700864	0.118324106	1	-84.65607105
M4006	2B	231660916	0.045862768	0.18556701	99	0.076700864	0.118293689	1	35.06226842
M7174	3B	41138847	0.045911311	0.422680412	99	0.076700864	0.118274679	1	27.15112988
M8047	3B	12179959	0.04592485	0.381443299	99	0.076700864	0.11826938	1	57.80928456
M8027	3B	775092204	0.04592485	0.381443299	99	0.076700864	0.11826938	1	-57.80928456
M7664	3B	581550904	0.046120772	0.391752577	99	0.076700864	0.118192895	1	31.77340848
M3541	2B	0	0.046148457	0.391752577	99	0.076700864	0.118182115	1	-52.85423248
M9230	4A	14039828	0.046164005	0.484536082	99	0.076700864	0.118176064	1	25.61529844
M9593	4B	485683793	0.046202107	0.494845361	99	0.076700864	0.118161245	1	-46.23509365
M4620	2B	741900958	0.046319853	0.319587629	99	0.076700864	0.118115532	1	32.21876023
M12757	6A	595669253	0.046356943	0.06185567	99	0.076700864	0.118101158	1	57.55403519
M1198	1B	93129941	0.046404699	0.041237113	99	0.076700864	0.118082669	1	-62.35892975
M14566	7A	83158962	0.046415739	0.360824742	99	0.076700864	0.118078398	1	35.2387835
M8463	3D	554403644	0.046667331	0.474226804	99	0.076700864	0.117981353	1	-41.12615436
M10306	5A	727382944	0.046703948	0.164948454	99	0.076700864	0.117967276	1	36.89344849
M2690	2A	382822301	0.046972924	0.474226804	99	0.076700864	0.117864232	1	-39.72769458
M1442	1B	29206505	0.047023841	0.18556701	99	0.076700864	0.117844797	1	-42.59588993
M14619	7A	116005684	0.047038631	0.329896907	99	0.076700864	0.117839156	1	-32.43283273
M8810	4A	601841436	0.047056091	0.216494845	99	0.076700864	0.117832499	1	38.60007136
M9676	4B	14423465	0.047095594	0.319587629	99	0.076700864	0.117817447	1	39.43466159
M8575	4A	46412568	0.04733378	0.226804124	99	0.076700864	0.117726979	1	-36.82567916
M3661	2B	56189523	0.047350586	0.360824742	99	0.076700864	0.117720614	1	-33.06194504
M4074	2B	236592763	0.047460624	0.463917526	99	0.076700864	0.117678999	1	26.47761891
M5173	2B	0	0.047471765	0.350515464	99	0.076700864	0.117674792	1	-44.58447536
M10171	5A	496135708	0.047518534	0.103092784	99	0.076700864	0.11765714	1	-41.95052098
M7544	3B	392957146	0.047621107	0.484536082	99	0.076700864	0.117618493	1	36.28234576
M3180	2A	779809063	0.047858557	0.443298969	99	0.076700864	0.117529369	1	31.89172132
M11987	5D	548345507	0.047951544	0.24742268	99	0.076700864	0.117494596	1	-40.83067412
M1095	1B	342391060	0.047996566	0.350515464	99	0.076700864	0.117477786	1	88.40760363
M1359	1B	30505270	0.047996566	0.350515464	99	0.076700864	0.117477786	1	88.40760363
M7231	3B	22276588	0.048118599	0.103092784	99	0.076700864	0.117432308	1	43.86538018
M1738	1B	637527763	0.048139532	0.288659794	99	0.076700864	0.117424519	1	-29.05078428
M13294	6B	230607608	0.048232671	0.432989691	99	0.076700864	0.117389908	1	-26.28406282
M1936	1B	678465588	0.048274148	0.391752577	99	0.076700864	0.117374518	1	-33.40477014
M12718	6A	344058238	0.048405864	0.082474227	99	0.076700864	0.117325739	1	48.63180539
M8978	4A	670943022	0.048518525	0.164948454	99	0.076700864	0.117284129	1	44.91705389
M13586	6B	664709293	0.048536588	0.072164948	99	0.076700864	0.117277468	1	47.48195263
M5133	2B	779248164	0.048785169	0.381443299	99	0.076700864	0.117186061	1	-47.5072235
M12990	6B	10301070	0.048813784	0.288659794	99	0.076700864	0.117175571	1	-33.44327415
M7697	3B	669426645	0.048964978	0.422680412	99	0.076700864	0.117120254	1	-32.41322151
M894	1B	178656968	0.049470806	0.443298969	99	0.076700864	0.116936514	1	33.61597775
M13238	6B	159138920	0.049471146	0.319587629	99	0.076700864	0.116936391	1	27.93730454
M12574	6A	524836376	0.049498926	0.072164948	99	0.076700864	0.116926359	1	-47.83497164
M3082	2A	735932521	0.049512519	0.340206186	99	0.076700864	0.116921452	1	-26.96388616
M13673	6B	0	0.049549231	0.484536082	99	0.076700864	0.116908207	1	27.81687888
M8989	4A	635530051	0.049901246	0.154639175	99	0.076700864	0.116781741	1	45.83298175
M5276	2B	792988297	0.050166823	0.164948454	99	0.076700864	0.116686963	1	-37.08717571
M7209	3B	130618089	0.050282015	0.474226804	99	0.076700864	0.116646021	1	40.57479759
M1808	1B	500473353	0.050327812	0.206185567	99	0.076700864	0.116629771	1	-34.95268701
M12202	6A	11569432	0.050447491	0.103092784	99	0.076700864	0.116587383	1	-46.17920317
M2642	2A	132163747	0.050450521	0.319587629	99	0.076700864	0.116586311	1	-30.21297895
M14661	7A	134621823	0.050476799	0.298969072	99	0.076700864	0.116577019	1	55.41943394
M15304	7B	130505517	0.050742768	0.391752577	99	0.076700864	0.116483262	1	-39.97882149
M7863	3B	736747193	0.050754515	0.18556701	99	0.076700864	0.116479133	1	32.76224743
M12663	6A	543972128	0.05089005	0.329896907	99	0.076700864	0.11643157	1	-30.41196739
M7533	3B	488191801	0.051057642	0.113402062	99	0.076700864	0.116372945	1	38.41418438
M12669	6A	478309953	0.051133082	0.443298969	99	0.076700864	0.116346624	1	-34.00821968
M1343	1B	180217094	0.05117022	0.18556701	99	0.076700864	0.116333681	1	-42.10634779
M9161	4A	708083352	0.051182617	0.474226804	99	0.076700864	0.116329363	1	42.11737026
M15280	7B	113767734	0.051190518	0.154639175	99	0.076700864	0.116326612	1	37.00701676
M3559	2B	0	0.051280603	0.360824742	99	0.076700864	0.116295273	1	28.83670508
M8367	3D	11455013	0.051314793	0.216494845	99	0.076700864	0.116283394	1	36.88406256
M1595	1B	587607110	0.051321212	0.350515464	99	0.076700864	0.116281165	1	-34.53106987
M4013	2B	210256847	0.051389332	0.175257732	99	0.076700864	0.116257527	1	39.23312575
M6187	3A	312266867	0.051394944	0.432989691	99	0.076700864	0.116255581	1	42.78476861
M9603	4B	602403690	0.051570176	0.484536082	99	0.076700864	0.116194936	1	-40.87836813
M5027	2B	758922449	0.051574867	0.381443299	99	0.076700864	0.116193315	1	-29.31441696
M9597	4B	581078619	0.051589743	0.474226804	99	0.076700864	0.116188178	1	37.25304484
M7587	3B	523570235	0.051620353	0.072164948	99	0.076700864	0.116177611	1	-53.16640869
M12530	6A	453550733	0.051721822	0.463917526	99	0.076700864	0.116142632	1	-37.26505248
M3314	2A	763309825	0.051820696	0.453608247	99	0.076700864	0.116108618	1	28.1067822
M14825	7A	644848734	0.051821994	0.422680412	99	0.076700864	0.116108172	1	43.3112202
M9555	4B	0	0.051879898	0.494845361	99	0.076700864	0.116088286	1	-45.58512161
M367	1A	556619807	0.052009155	0.195876289	99	0.076700864	0.11604398	1	33.15306365
M3485	2B	19448467	0.052037646	0.268041237	99	0.076700864	0.11603423	1	-31.45828321
M1215	1B	29514277	0.052042683	0.463917526	99	0.076700864	0.116032507	1	29.19388893
M14947	7A	704615462	0.052074009	0.484536082	99	0.076700864	0.116021794	1	-34.77178122
M7208	3B	130618089	0.052187382	0.474226804	99	0.076700864	0.115983082	1	-43.78230255
M12598	6A	57659058	0.052189394	0.154639175	99	0.076700864	0.115982396	1	38.57176367
M6711	3A	715352220	0.052294573	0.237113402	99	0.076700864	0.115946564	1	-40.91778639
M9846	5A	10268070	0.052442077	0.24742268	99	0.076700864	0.115896445	1	-31.13639177
M858	1B	36034202	0.052548442	0.288659794	99	0.076700864	0.115860397	1	34.23794037
M12644	6A	22624721	0.052590769	0.134020619	99	0.076700864	0.115846074	1	38.01816614
M6370	3A	482936809	0.052693813	0.381443299	99	0.076700864	0.115811257	1	33.00258279
M7751	3B	72949372	0.052838996	0.443298969	99	0.076700864	0.115762327	1	26.05909263
M5774	2D	0	0.052937466	0.494845361	99	0.076700864	0.115729222	1	-38.68567577
M6233	3A	17865413	0.053001816	0.288659794	99	0.076700864	0.115707624	1	27.88725662
M2005	1D	495342360	0.053231228	0.391752577	99	0.076700864	0.115630855	1	35.27405208
M9617	4B	643534047	0.053238186	0.494845361	99	0.076700864	0.115628532	1	-41.25245486
M4778	2B	739568493	0.053305755	0.443298969	99	0.076700864	0.115605992	1	-29.61557311
M12891	6A	614663924	0.05333754	0.18556701	99	0.076700864	0.1155954	1	36.81526205
M9600	4B	785378125	0.053439872	0.18556701	99	0.076700864	0.115561344	1	-36.00615644
M414	1A	97149083	0.053564016	0.06185567	99	0.076700864	0.115520124	1	-49.1115703
M3341	2A	306905103	0.053712882	0.350515464	99	0.076700864	0.11547083	1	82.75764253
M3343	2A	0	0.053712882	0.350515464	99	0.076700864	0.11547083	1	-82.75764253
M2965	2A	705340913	0.053726539	0.24742268	99	0.076700864	0.115466315	1	-35.6386442
M8420	3D	411004230	0.053765121	0.484536082	99	0.076700864	0.115453567	1	-27.31152095
M12696	6A	415890191	0.053832602	0.164948454	99	0.076700864	0.115431294	1	-38.24817991
M2855	2A	423291292	0.053849359	0.134020619	99	0.076700864	0.115425768	1	-35.4682
M1072	1B	21849576	0.053866209	0.113402062	99	0.076700864	0.115420213	1	37.43366199
M1303	1B	399336171	0.05387701	0.103092784	99	0.076700864	0.115416653	1	-38.93603083
M6363	3A	531631181	0.053981965	0.340206186	99	0.076700864	0.115382102	1	32.89992838
M4768	2B	729134454	0.053987203	0.494845361	99	0.076700864	0.115380379	1	27.19109875
M3067	2A	642784267	0.053996659	0.494845361	99	0.076700864	0.11537727	1	30.81410793
M9048	4A	654345599	0.054120492	0.463917526	99	0.076700864	0.115336609	1	-36.65920432
M2291	1D	586317908	0.054254421	0.484536082	99	0.076700864	0.115292746	1	35.86633212
M5960	2D	24059625	0.05427339	0.432989691	99	0.076700864	0.115286543	1	-44.41499617
M8691	4A	295850823	0.054317794	0.041237113	99	0.076700864	0.115272031	1	-58.67891446
M1426	1B	531206119	0.054446697	0.453608247	99	0.076700864	0.115229977	1	-35.65609965
M9309	4A	719934001	0.054617416	0.350515464	99	0.076700864	0.115174446	1	-33.55431867
M8151	3B	818871534	0.054643516	0.340206186	99	0.076700864	0.115165972	1	116.6189499
M3220	2A	0	0.054643516	0.340206186	99	0.076700864	0.115165972	1	-116.6189499
M9106	4A	694752853	0.054677195	0.237113402	99	0.076700864	0.115155045	1	31.53942742
M47	1A	0	0.054821181	0.206185567	99	0.076700864	0.115108409	1	30.44588699
M9075	4A	643624450	0.054892713	0.144329897	99	0.076700864	0.11508529	1	36.68675231
M3531	2B	9887842	0.054900384	0.360824742	99	0.076700864	0.115082813	1	32.01136535
M3865	2B	132352331	0.055255709	0.402061856	99	0.076700864	0.114968467	1	-43.17661889
M6617	3A	688594260	0.055512181	0.412371134	99	0.076700864	0.114886425	1	43.87413979
M6956	3B	35203565	0.055538721	0.072164948	99	0.076700864	0.114877959	1	50.03994902
M4945	2B	760153315	0.055653603	0.381443299	99	0.076700864	0.114841361	1	-32.0701461
M6029	3A	9486770	0.055734291	0.463917526	99	0.076700864	0.114815705	1	-39.21865614
M8454	3D	509370071	0.056020234	0.226804124	99	0.076700864	0.114725107	1	-34.55539427
M3388	2A	588436341	0.056275101	0.412371134	99	0.076700864	0.114644774	1	-28.21319716
M6892	3B	7791132	0.056398982	0.18556701	99	0.076700864	0.11460587	1	-29.98569878
M13558	6B	660491055	0.056429345	0.257731959	99	0.076700864	0.114596348	1	-37.33545368
M5501	2D	69257940	0.056605005	0.453608247	99	0.076700864	0.114541372	1	26.85221744
M616	1A	575190181	0.056656632	0.237113402	99	0.076700864	0.114525249	1	31.23765414
M3797	2B	262262279	0.056680712	0.360824742	99	0.076700864	0.114517735	1	66.38152225
M2314	1D	489968994	0.056686816	0.474226804	99	0.076700864	0.11451583	1	31.43787032
M11078	5B	502152339	0.056748275	0.24742268	99	0.076700864	0.114496669	1	39.12777022
M1220	1B	2308496	0.056809241	0.113402062	99	0.076700864	0.114477684	1	49.93617312
M1537	1B	568960943	0.056848658	0.391752577	99	0.076700864	0.11446542	1	27.49523344
M6311	3A	69361313	0.056946978	0.371134021	99	0.076700864	0.114434872	1	-38.57628768
M13788	6B	715680744	0.056970739	0.412371134	99	0.076700864	0.114427497	1	-28.73099226
M10981	5B	476791459	0.056973033	0.030927835	99	0.076700864	0.114426786	1	69.85518446
M9607	4B	637622767	0.057581895	0.484536082	99	0.076700864	0.114238959	1	-44.24836197
M9610	4B	637586800	0.057581895	0.484536082	99	0.076700864	0.114238959	1	-44.24836197
M13818	6B	715321146	0.057603238	0.474226804	99	0.076700864	0.114232414	1	-39.50362475
M7519	3B	391861154	0.057635243	0.484536082	99	0.076700864	0.114222605	1	-33.66186661
M13133	6B	64739569	0.057648543	0.350515464	99	0.076700864	0.11421853	1	-61.35870646
M9596	4B	601792865	0.057690037	0.494845361	99	0.076700864	0.114205824	1	42.19621071
M9554	4B	554966424	0.057690037	0.494845361	99	0.076700864	0.114205824	1	-42.19621071
M9570	4B	469073230	0.057690037	0.494845361	99	0.076700864	0.114205824	1	-42.19621071
M9595	4B	601792865	0.057690037	0.494845361	99	0.076700864	0.114205824	1	-42.19621071
M1828	1B	659387123	0.057816859	0.402061856	99	0.076700864	0.114167049	1	-25.20035058
M2883	2A	585814477	0.057979418	0.381443299	99	0.076700864	0.114117483	1	31.23598579
M13304	6B	471100656	0.05809082	0.340206186	99	0.076700864	0.114083602	1	31.71057478
M8979	4A	676492514	0.058100843	0.494845361	99	0.076700864	0.114080557	1	40.29196699
M8563	4A	59371930	0.058213611	0.494845361	99	0.076700864	0.114046338	1	37.76980466
M6759	3A	585937578	0.058306913	0.072164948	99	0.076700864	0.11401808	1	45.99757297
M3533	2B	28352270	0.058387207	0.381443299	99	0.076700864	0.113993801	1	30.51640074
M7287	3B	50022030	0.058395602	0.443298969	99	0.076700864	0.113991265	1	-32.14440561
M3738	2B	44609696	0.058407486	0.443298969	99	0.076700864	0.113987675	1	40.14369001
M5068	2B	706995991	0.058455712	0.474226804	99	0.076700864	0.113973115	1	-30.45187457
M1024	1B	12347623	0.058622713	0.051546392	99	0.076700864	0.113922797	1	-52.28962584
M13217	6B	140452382	0.058675321	0.226804124	99	0.076700864	0.113906978	1	-28.83063893
M14171	7A	501554142	0.058874636	0.18556701	99	0.076700864	0.113847184	1	-38.6590698
M10671	5B	308626623	0.058895754	0.484536082	99	0.076700864	0.113840862	1	-32.74248096
M8177	3B	718878829	0.058916036	0.350515464	99	0.076700864	0.113834792	1	84.86960352
M3320	2A	765838734	0.058923764	0.216494845	99	0.076700864	0.113832479	1	32.99563164
M9448	4B	4892979	0.058993682	0.268041237	99	0.076700864	0.113811575	1	29.89034043
M13244	6B	369032033	0.059078835	0.474226804	99	0.076700864	0.113786151	1	36.69120332
M8987	4A	635530051	0.059104136	0.494845361	99	0.076700864	0.113778605	1	-43.19194011
M5351	2B	797277976	0.059405732	0.164948454	99	0.076700864	0.113688919	1	35.73607835
M7276	3B	634411180	0.059462826	0.494845361	99	0.076700864	0.113671996	1	-23.95118042
M3104	2A	744493388	0.059531621	0.237113402	99	0.076700864	0.113651629	1	-31.18194595
M9571	4B	8256802	0.059548922	0.484536082	99	0.076700864	0.113646511	1	42.12161686
M2029	1D	10234393	0.059668208	0.463917526	99	0.076700864	0.113611266	1	-27.39857594
M7951	3B	0	0.059713908	0.422680412	99	0.076700864	0.113597784	1	29.98765216
M8692	4A	295850823	0.059741601	0.164948454	99	0.076700864	0.113589619	1	-33.12883186
M8178	3B	718878829	0.059932777	0.340206186	99	0.076700864	0.113533367	1	-30.0507597
M9851	5A	9210215	0.059955805	0.278350515	99	0.076700864	0.113526605	1	-31.73862266
M10715	5B	75319717	0.060016253	0.18556701	99	0.076700864	0.113508866	1	34.82873691
M5355	2B	791958920	0.060193786	0.422680412	99	0.076700864	0.11345688	1	49.62861643
M14807	7A	634798149	0.06031396	0.484536082	99	0.076700864	0.113421785	1	-35.4735917
M4090	2B	436537228	0.060474841	0.18556701	99	0.076700864	0.113374919	1	33.79450675
M3996	2B	0	0.060548734	0.443298969	99	0.076700864	0.113353439	1	31.59040908
M6051	3A	143037183	0.060631713	0.206185567	99	0.076700864	0.113329352	1	-34.49896986
M8889	4A	747299239	0.060636524	0.484536082	99	0.076700864	0.113327956	1	-33.69962929
M1366	1B	506221877	0.060646134	0.484536082	99	0.076700864	0.113325169	1	40.86710198
M792	1B	179842147	0.060674269	0.494845361	99	0.076700864	0.113317012	1	28.92339619
M10039	5A	441478599	0.060863523	0.402061856	99	0.076700864	0.113262249	1	28.28693037
M5237	2B	642478723	0.061145313	0.319587629	99	0.076700864	0.113181051	1	33.92354418
M3551	2B	30630417	0.061183643	0.371134021	99	0.076700864	0.113170037	1	32.66757163
M11963	5D	531606683	0.061384685	0.309278351	99	0.076700864	0.113112393	1	33.45170824
M5712	2D	570998838	0.061426167	0.134020619	99	0.076700864	0.113100524	1	35.82651133
M5652	2D	694059807	0.061428573	0.175257732	99	0.076700864	0.113099836	1	31.24774433
M5104	2B	773807439	0.061734734	0.237113402	99	0.076700864	0.11301251	1	34.46969701
M9425	4A	1736032	0.061786851	0.206185567	99	0.076700864	0.112997692	1	32.57638644
M3052	2A	726414431	0.061894646	0.195876289	99	0.076700864	0.112967085	1	-33.50032514
M15409	7B	542993770	0.062089097	0.453608247	99	0.076700864	0.11291202	1	40.53176669
M2968	2A	705551828	0.062100543	0.453608247	99	0.076700864	0.112908784	1	-32.33251261
M3903	2B	64912411	0.062219862	0.340206186	99	0.076700864	0.112875094	1	28.27091969
M8488	3D	584224510	0.062256093	0.319587629	99	0.076700864	0.112864879	1	27.5990707
M3971	2B	128269909	0.06225986	0.319587629	99	0.076700864	0.112863817	1	30.30953864
M10729	5B	392637226	0.062326912	0.350515464	99	0.076700864	0.112844928	1	86.24457134
M860	1B	26832143	0.062336441	0.432989691	99	0.076700864	0.112842246	1	26.08369927
M4041	2B	236170471	0.062577101	0.463917526	99	0.076700864	0.112774644	1	36.91781404
M6254	3A	17649583	0.062708965	0.072164948	99	0.076700864	0.112737723	1	-50.8723519
M8633	4A	531682048	0.062762057	0.494845361	99	0.076700864	0.112722881	1	39.36948213
M3706	2B	73269997	0.062879749	0.371134021	99	0.076700864	0.112690029	1	43.79595052
M6162	3A	15976105	0.062889037	0.494845361	99	0.076700864	0.112687439	1	39.10189353
M6077	3A	0	0.063029723	0.134020619	99	0.076700864	0.112648263	1	-38.50729431
M4154	2B	183207936	0.06313945	0.216494845	99	0.076700864	0.112617773	1	-31.15236885
M13203	6B	65496487	0.063170894	0.371134021	99	0.076700864	0.112609046	1	61.64340495
M15591	7B	580851026	0.063449281	0.402061856	99	0.076700864	0.112531989	1	28.99731862
M3665	2B	59764104	0.063475859	0.412371134	99	0.076700864	0.112524652	1	23.41433109
M2958	2A	693269842	0.063490664	0.443298969	99	0.076700864	0.112520566	1	-33.05139194
M1109	1B	744753328	0.063539733	0.350515464	99	0.076700864	0.112507031	1	82.03332628
M1117	1B	602172778	0.063539733	0.350515464	99	0.076700864	0.112507031	1	82.03332628
M1151	1B	412244460	0.063539733	0.350515464	99	0.076700864	0.112507031	1	82.03332628
M1183	1B	265486779	0.063539733	0.350515464	99	0.076700864	0.112507031	1	82.03332628
M1113	1B	74705448	0.063539733	0.350515464	99	0.076700864	0.112507031	1	-82.03332628
M1133	1B	0	0.063539733	0.350515464	99	0.076700864	0.112507031	1	-82.03332628
M11455	5B	546831358	0.063539733	0.350515464	99	0.076700864	0.112507031	1	-82.03332628
M1161	1B	474121296	0.063539733	0.350515464	99	0.076700864	0.112507031	1	-82.03332628
M1179	1B	90108160	0.063539733	0.350515464	99	0.076700864	0.112507031	1	-82.03332628
M3546	2B	824552561	0.063605494	0.237113402	99	0.076700864	0.11248891	1	32.90186002
M3761	2B	434731139	0.063743072	0.474226804	99	0.076700864	0.112451065	1	-35.32949215
M4429	2B	632518271	0.063901905	0.082474227	99	0.076700864	0.112407483	1	43.92321952
M9992	5A	46505672	0.063934844	0.474226804	99	0.076700864	0.11239846	1	37.32613898
M10606	5B	369428012	0.064063371	0.113402062	99	0.076700864	0.112363299	1	42.67435096
M105	1A	16914186	0.064156576	0.298969072	99	0.076700864	0.112337849	1	25.20326355
M5706	2D	591603469	0.064199513	0.371134021	99	0.076700864	0.112326139	1	49.44394018
M9766	4D	394378216	0.064465589	0.381443299	99	0.076700864	0.112253758	1	30.32290053
M1273	1B	4383550	0.064601314	0.360824742	99	0.076700864	0.112216962	1	-31.35538316
M9027	4A	49368188	0.064806437	0.391752577	99	0.076700864	0.11216151	1	51.87812556
M10717	5B	75319717	0.064863392	0.360824742	99	0.076700864	0.112146147	1	-53.33656642
M5067	2B	706995991	0.064929877	0.474226804	99	0.076700864	0.112128232	1	-35.56399623
M7436	3B	176317008	0.065001847	0.082474227	99	0.076700864	0.112108861	1	-41.50354775
M4073	2B	236592763	0.065013365	0.24742268	99	0.076700864	0.112105763	1	-38.33634124
M1902	1B	602910762	0.065074338	0.371134021	99	0.076700864	0.112089373	1	23.81938249
M9366	4A	732819559	0.065154896	0.216494845	99	0.076700864	0.112067745	1	33.98340727
M8968	4A	42128733	0.06523225	0.175257732	99	0.076700864	0.112047004	1	-39.38488926
M8365	3D	436621773	0.065308905	0.051546392	99	0.076700864	0.112026477	1	-51.22894433
M2817	2A	477627488	0.065310145	0.288659794	99	0.076700864	0.112026145	1	38.34294824
M11057	5B	0	0.065325057	0.020618557	99	0.076700864	0.112022155	1	-85.50454448
M11272	5B	519661386	0.065524063	0.12371134	99	0.076700864	0.111968999	1	35.54602712
M7283	3B	48788274	0.065739307	0.237113402	99	0.076700864	0.111911704	1	31.86691006
M3553	2B	0	0.065747757	0.298969072	99	0.076700864	0.111909459	1	-30.09128417
M6045	3A	0	0.065765829	0.175257732	99	0.076700864	0.111904658	1	31.16538874
M8282	3D	1203048	0.06579232	0.309278351	99	0.076700864	0.111897624	1	-26.58564745
M396	1A	504090014	0.065841862	0.422680412	99	0.076700864	0.111884477	1	35.62396693
M5807	2D	601970973	0.065872053	0.432989691	99	0.076700864	0.11187647	1	-43.43931901
M10858	5B	43702204	0.065879286	0.154639175	99	0.076700864	0.111874552	1	33.03849913
M9311	4A	0	0.066112068	0.309278351	99	0.076700864	0.11181296	1	-34.69258983
M1417	1B	526750429	0.066123044	0.144329897	99	0.076700864	0.111810062	1	50.9990568
M4092	2B	445251666	0.066187227	0.237113402	99	0.076700864	0.111793124	1	-28.43067645
M9049	4A	655668912	0.066337572	0.195876289	99	0.076700864	0.111753517	1	-36.19761602
M5674	2D	606518197	0.066382313	0.24742268	99	0.076700864	0.111741749	1	30.74608625
M8621	4A	127984307	0.066518373	0.020618557	99	0.076700864	0.111706016	1	79.01322612
M848	1B	17621853	0.066544656	0.298969072	99	0.076700864	0.111699123	1	31.56403222
M13584	6B	666138160	0.066558587	0.412371134	99	0.076700864	0.11169547	1	36.07968758
M4175	2B	629815276	0.066808946	0.329896907	99	0.076700864	0.111629969	1	-27.79198276
M10120	5A	340173231	0.066852708	0.443298969	99	0.076700864	0.111618547	1	29.2138464
M9386	4A	739304166	0.066997272	0.371134021	99	0.076700864	0.111580873	1	32.9703518
M14169	7A	11374457	0.067026226	0.329896907	99	0.076700864	0.111573338	1	77.90160273
M9088	4A	697825160	0.067243497	0.144329897	99	0.076700864	0.111516909	1	33.48496082
M15413	7B	309802071	0.067283909	0.474226804	99	0.076700864	0.111506435	1	-35.57624274
M8552	4A	47132358	0.067298953	0.288659794	99	0.076700864	0.111502538	1	-31.07381704
M699	1A	590240846	0.067303146	0.288659794	99	0.076700864	0.111501452	1	-58.96215201
M2378	2A	0	0.067510945	0.350515464	99	0.076700864	0.111447719	1	30.24305125
M1311	1B	328983636	0.067665941	0.463917526	99	0.076700864	0.111407758	1	38.41643732
M975	1B	94373668	0.067690603	0.24742268	99	0.076700864	0.111401409	1	-30.54040042
M9061	4A	4271248	0.067853298	0.206185567	99	0.076700864	0.111359585	1	29.75929124
M14184	7A	12011036	0.068091127	0.072164948	99	0.076700864	0.111298644	1	-52.11720487
M12573	6A	524836376	0.068238041	0.350515464	99	0.076700864	0.111261114	1	-28.46038159
M1110	1B	744753328	0.068470452	0.226804124	99	0.076700864	0.111201922	1	36.21974576
M932	1B	0	0.068474856	0.051546392	99	0.076700864	0.111200803	1	-53.69681355
M100	1A	16408364	0.06857641	0.195876289	99	0.076700864	0.111175009	1	29.37966093
M8940	4A	673929919	0.068611453	0.175257732	99	0.076700864	0.111166118	1	30.12357661
M10080	5A	467370058	0.068758938	0.443298969	99	0.076700864	0.111128753	1	44.87329259
M6315	3A	60005414	0.068854614	0.463917526	99	0.076700864	0.11110456	1	31.59420096
M11354	5B	199999661	0.068980572	0.432989691	99	0.076700864	0.111072766	1	32.63747733
M15187	7B	32548566	0.069081132	0.432989691	99	0.076700864	0.111047428	1	37.23850293
M5554	2D	412255620	0.069144969	0.371134021	99	0.076700864	0.111031364	1	32.30085754
M3545	2B	824552561	0.069152336	0.432989691	99	0.076700864	0.111029511	1	32.57478261
M9214	4A	14301407	0.069323225	0.391752577	99	0.076700864	0.110986592	1	40.39561914
M12892	6A	614663924	0.069439941	0.381443299	99	0.076700864	0.110957345	1	-61.26525486
M13305	6B	346802293	0.06944181	0.453608247	99	0.076700864	0.110956878	1	37.9887224
M15448	7B	582709177	0.069560048	0.463917526	99	0.076700864	0.110927305	1	36.96956817
M10228	5A	420625497	0.06969992	0.309278351	99	0.076700864	0.110892391	1	28.47983347
M808	1B	0	0.069817074	0.298969072	99	0.076700864	0.110863207	1	33.49673546
M8347	3D	41035027	0.069847894	0.381443299	99	0.076700864	0.110855538	1	-25.7013164
M6960	3B	34156850	0.070059479	0.226804124	99	0.076700864	0.110802991	1	-28.99054063
M3942	2B	32805672	0.070104516	0.113402062	99	0.076700864	0.110791828	1	35.71584639
M1873	1B	664777238	0.070448337	0.391752577	99	0.076700864	0.110706866	1	31.95973415
M3978	2B	174831753	0.07046191	0.092783505	99	0.076700864	0.110703521	1	-42.52075233
M520	1A	548790406	0.070518777	0.391752577	99	0.076700864	0.110689516	1	23.63461194
M11301	5B	93785910	0.070534903	0.453608247	99	0.076700864	0.110685546	1	39.31235882
M3968	2B	176172344	0.070554634	0.453608247	99	0.076700864	0.110680691	1	-34.54663686
M4012	2B	194997269	0.070680862	0.371134021	99	0.076700864	0.110649662	1	-25.63648726
M6775	3A	0	0.070749473	0.381443299	99	0.076700864	0.110632823	1	38.32633238
M7111	3B	22453000	0.070757958	0.195876289	99	0.076700864	0.110630741	1	-31.63931288
M3987	2B	159210768	0.070821278	0.329896907	99	0.076700864	0.110615218	1	-48.14075736
M4621	2B	665938471	0.070904794	0.453608247	99	0.076700864	0.110594766	1	28.26575345
M8956	4A	648906704	0.070917477	0.082474227	99	0.076700864	0.110591663	1	-40.3478114
M8145	3B	810657303	0.070947023	0.463917526	99	0.076700864	0.110584435	1	-31.55397585
M3243	2A	759767692	0.071163705	0.072164948	99	0.076700864	0.11053153	1	-43.43056016
M626	1A	481551847	0.07119371	0.288659794	99	0.076700864	0.110524218	1	29.43803111
M6023	3A	1286118	0.071277192	0.164948454	99	0.076700864	0.110503891	1	-34.54219793
M1700	1B	615466970	0.071338734	0.144329897	99	0.076700864	0.110488923	1	34.78765879
M4015	2B	138248491	0.071354185	0.18556701	99	0.076700864	0.110485167	1	32.69022128
M10922	5B	455980608	0.071358157	0.051546392	99	0.076700864	0.110484202	1	49.98894926
M3083	2A	154349970	0.071410012	0.494845361	99	0.076700864	0.110471604	1	-36.44921917
M6013	2D	0	0.07144749	0.360824742	99	0.076700864	0.110462506	1	-64.84939166
M8559	4A	48889994	0.071447758	0.443298969	99	0.076700864	0.110462441	1	32.71638859
M193	1A	489600357	0.071618921	0.422680412	99	0.076700864	0.110420954	1	24.74007396
M1947	1B	0	0.07167108	0.381443299	99	0.076700864	0.110408333	1	36.2139668
M15584	7B	0	0.071688876	0.422680412	99	0.076700864	0.110404029	1	-42.32822827
M9239	4A	727965119	0.071701211	0.340206186	99	0.076700864	0.110401047	1	-30.09208755
M7039	3B	17613543	0.071749227	0.206185567	99	0.076700864	0.110389442	1	-32.96473111
M919	1B	57506385	0.072030128	0.432989691	99	0.076700864	0.110321724	1	38.82493268
M9179	4A	709851704	0.072069532	0.360824742	99	0.076700864	0.110312248	1	-31.71940971
M2933	2A	138659939	0.072387669	0.319587629	99	0.076700864	0.110235946	1	-63.89149002
M393	1A	623753947	0.072435741	0.432989691	99	0.076700864	0.110224448	1	-35.93801248
M6966	3B	10656805	0.072463183	0.134020619	99	0.076700864	0.110217889	1	-37.05783329
M4000	2B	213709998	0.072472317	0.237113402	99	0.076700864	0.110215706	1	27.31510062
M8964	4A	654058604	0.072694916	0.494845361	99	0.076700864	0.110162602	1	40.90835976
M8977	4A	670943022	0.072694916	0.494845361	99	0.076700864	0.110162602	1	40.90835976
M8973	4A	681683099	0.072694916	0.494845361	99	0.076700864	0.110162602	1	-40.90835976
M3869	2B	106962921	0.072727715	0.371134021	99	0.076700864	0.110154793	1	26.9699711
M12731	6A	691304428	0.072856942	0.402061856	99	0.076700864	0.110124061	1	-27.80223972
M923	1B	385657223	0.072865282	0.381443299	99	0.076700864	0.110122079	1	-52.87994468
M8319	3D	37969650	0.072986205	0.18556701	99	0.076700864	0.110093379	1	-31.83908968
M3000	2A	713536628	0.073126982	0.164948454	99	0.076700864	0.110060033	1	-35.70668431
M9231	4A	26495448	0.073173916	0.360824742	99	0.076700864	0.110048931	1	-29.31545381
M11333	5B	532933730	0.073303384	0.453608247	99	0.076700864	0.110018346	1	40.53158693
M8740	4A	521603853	0.07331956	0.453608247	99	0.076700864	0.110014529	1	37.56646759
M1391	1B	499899181	0.073353894	0.360824742	99	0.076700864	0.11000643	1	-30.28732263
M1168	1B	34945936	0.073357434	0.082474227	99	0.076700864	0.110005595	1	-40.56199747
M3073	2A	735763589	0.073410134	0.474226804	99	0.076700864	0.109993173	1	31.67010728
M8217	3B	826654769	0.073455886	0.422680412	99	0.076700864	0.109982395	1	30.7857525
M2210	1D	475877262	0.073484382	0.226804124	99	0.076700864	0.109975687	1	28.11659167
M2307	1D	683382396	0.07350861	0.340206186	99	0.076700864	0.109969985	1	-24.95017953
M4187	2B	374802883	0.073619361	0.144329897	99	0.076700864	0.109943949	1	35.49110099
M11061	5B	189721298	0.07377594	0.340206186	99	0.076700864	0.109907211	1	37.81157819
M14143	7A	4440321	0.073778763	0.340206186	99	0.076700864	0.109906549	1	-32.16411723
M11388	5B	541284213	0.073788107	0.309278351	99	0.076700864	0.10990436	1	-30.99487134
M1932	1B	679689086	0.07380556	0.371134021	99	0.076700864	0.10990027	1	-24.29797307
M8846	4A	618529609	0.073853307	0.443298969	99	0.076700864	0.10988909	1	-28.82196988
M9096	4A	640249155	0.074131807	0.278350515	99	0.076700864	0.10982403	1	-33.65812339
M3685	2B	75402640	0.074197128	0.443298969	99	0.076700864	0.109808809	1	34.33497045
M5258	2B	765373126	0.074446308	0.175257732	99	0.076700864	0.10975088	1	30.94926676
M13716	6B	0	0.074465365	0.402061856	99	0.076700864	0.109746458	1	-37.8835369
M236	1A	341122401	0.0744664	0.340206186	99	0.076700864	0.109746218	1	-34.58130218
M8385	3D	284212614	0.074480138	0.443298969	99	0.076700864	0.109743031	1	41.32280913
M9884	5A	199146737	0.074590934	0.298969072	99	0.076700864	0.109717354	1	-27.85071126
M6894	3B	0	0.074651113	0.298969072	99	0.076700864	0.109703425	1	-27.97346394
M1415	1B	528360171	0.074661768	0.463917526	99	0.076700864	0.10970096	1	-46.41017762
M8733	4A	0	0.074762801	0.329896907	99	0.076700864	0.109677606	1	26.89857742
M13491	6B	641150463	0.074961184	0.484536082	99	0.076700864	0.10963185	1	-36.48266731
M971	1B	24539459	0.075081971	0.422680412	99	0.076700864	0.109604056	1	-32.53675119
M9789	4D	469431667	0.075108935	0.298969072	99	0.076700864	0.109597858	1	26.70283311
M15492	7B	206170311	0.075456441	0.082474227	99	0.076700864	0.109518196	1	43.09764515
M9414	4A	743748313	0.075456586	0.381443299	99	0.076700864	0.109518163	1	39.90888825
M10597	5B	20628549	0.075473525	0.412371134	99	0.076700864	0.10951429	1	28.62461198
M4899	2B	23305984	0.075502383	0.391752577	99	0.076700864	0.109507694	1	-28.55007522
M9604	4B	602403690	0.075666807	0.453608247	99	0.076700864	0.109470166	1	32.23335504
M13429	6B	515186463	0.075729983	0.381443299	99	0.076700864	0.109455771	1	28.12948351
M14059	6D	450169167	0.075744062	0.422680412	99	0.076700864	0.109452564	1	31.01249423
M9584	4B	618159692	0.075802923	0.164948454	99	0.076700864	0.109439167	1	-38.80102527
M9615	4B	630378256	0.075802923	0.164948454	99	0.076700864	0.109439167	1	-38.80102527
M9880	5A	0	0.076289518	0.092783505	99	0.076700864	0.109328843	1	-38.36990663
M369	1A	502682654	0.076327031	0.278350515	99	0.076700864	0.10932037	1	31.57156854
M9165	4A	710830242	0.076577672	0.257731959	99	0.076700864	0.109263874	1	-36.28040467
M6333	3A	433329293	0.076581631	0.24742268	99	0.076700864	0.109262983	1	-27.95590543
M3990	2B	126899677	0.076677458	0.12371134	99	0.076700864	0.109241437	1	-36.68461716
M4176	2B	629815276	0.076682735	0.474226804	99	0.076700864	0.109240252	1	25.53431336
M5542	2D	530255014	0.076706157	0.309278351	99	0.076700864	0.10923499	1	29.24504562
M9980	5A	438355093	0.07676003	0.329896907	99	0.076700864	0.109222896	1	-37.74094396
M2227	1D	545033351	0.076775281	0.020618557	99	0.076700864	0.109219473	1	75.6238947
M11222	5B	663529702	0.076885502	0.484536082	99	0.076700864	0.109194762	1	-38.1017846
M8006	3B	0	0.076953574	0.360824742	99	0.076700864	0.10917952	1	42.67660508
M10480	5A	612723577	0.076997457	0.164948454	99	0.076700864	0.109169702	1	32.09766345
M3888	2B	0	0.077034345	0.175257732	99	0.076700864	0.109161454	1	32.5587846
M12812	6A	696921778	0.077088309	0.350515464	99	0.076700864	0.109149395	1	29.9377981
M9739	4D	663571979	0.077097092	0.103092784	99	0.076700864	0.109147433	1	37.55566148
M8547	4A	381110396	0.077107992	0.350515464	99	0.076700864	0.109144999	1	-25.78636057
M3452	2B	14601769	0.077136425	0.443298969	99	0.076700864	0.109138651	1	-24.04131251
M2987	2A	708156038	0.077156317	0.484536082	99	0.076700864	0.109134211	1	39.68081384
M10104	5A	467383563	0.077327197	0.237113402	99	0.076700864	0.109096124	1	29.81394351
M15068	7A	715925326	0.077337578	0.422680412	99	0.076700864	0.109093813	1	44.72837288
M2995	2A	711468133	0.077340846	0.422680412	99	0.076700864	0.109093085	1	-33.09380941
M15034	7A	0	0.077435809	0.268041237	99	0.076700864	0.109071963	1	26.76058275
M15449	7B	584025901	0.077451795	0.144329897	99	0.076700864	0.10906841	1	-34.28923824
M3555	2B	29045988	0.077565208	0.319587629	99	0.076700864	0.109043227	1	-31.71981202
M11372	5B	362127576	0.077688857	0.020618557	99	0.076700864	0.109015816	1	-76.06952394
M8326	3D	310971726	0.077688857	0.020618557	99	0.076700864	0.109015816	1	-76.06952394
M12369	6A	37394584	0.077688857	0.020618557	99	0.076700864	0.109015816	1	76.06952394
M8963	4A	654058604	0.077696457	0.18556701	99	0.076700864	0.109014133	1	38.05424414
M9735	4D	681466316	0.07785486	0.432989691	99	0.076700864	0.108979092	1	39.77773229
M10589	5B	576692587	0.078009601	0.391752577	99	0.076700864	0.108944936	1	-27.68428791
M453	1A	537889263	0.078125748	0.391752577	99	0.076700864	0.108919347	1	47.46200454
M1732	1B	636679505	0.078188862	0.463917526	99	0.076700864	0.10890546	1	44.39667891
M5139	2B	785074409	0.078229834	0.134020619	99	0.076700864	0.108896452	1	-32.18136001
M9785	4D	571615679	0.078375878	0.257731959	99	0.076700864	0.108864382	1	27.38392642
M9046	4A	658343323	0.078413446	0.206185567	99	0.076700864	0.108856143	1	-33.8648906
M14693	7A	255900956	0.078478905	0.484536082	99	0.076700864	0.108841798	1	-29.51111606
M13308	6B	437468761	0.078504408	0.432989691	99	0.076700864	0.108836213	1	28.06024835
M2784	2A	401591130	0.078530613	0.113402062	99	0.076700864	0.108830476	1	-36.60420396
M11681	5B	617590427	0.07884564	0.463917526	99	0.076700864	0.108761671	1	-36.57314325
M8031	3B	776544907	0.079019715	0.371134021	99	0.076700864	0.10872378	1	-55.65141583
M7355	3B	147794872	0.079222251	0.360824742	99	0.076700864	0.10867981	1	-37.26699024
M10105	5A	473093367	0.079341085	0.360824742	99	0.076700864	0.108654068	1	-26.53922628
M640	1A	580453133	0.079435736	0.319587629	99	0.076700864	0.108633595	1	25.71842104
M7106	3B	21863643	0.079591783	0.24742268	99	0.076700864	0.1085999	1	-39.06838049
M12618	6A	552827957	0.079593484	0.371134021	99	0.076700864	0.108599533	1	25.30149401
M5561	2D	432854196	0.079669514	0.391752577	99	0.076700864	0.108583143	1	-25.38006843
M13571	6B	561062316	0.079694734	0.371134021	99	0.076700864	0.10857771	1	30.43512112
M12562	6A	462581310	0.079838256	0.402061856	99	0.076700864	0.108546827	1	26.07685035
M4047	2B	189613120	0.079913325	0.164948454	99	0.076700864	0.108530698	1	-32.38878443
M7068	3B	15205844	0.079914467	0.309278351	99	0.076700864	0.108530453	1	-31.18240345
M5198	2B	647814104	0.080103993	0.288659794	99	0.076700864	0.108489807	1	-31.06920269
M6817	3A	728057245	0.080193431	0.412371134	99	0.076700864	0.108470663	1	-39.77791225
M535	1A	551910173	0.080200906	0.432989691	99	0.076700864	0.108469063	1	-26.83474473
M13794	6B	467011945	0.080510098	0.474226804	99	0.076700864	0.108403067	1	-25.72001282
M3376	2A	646604085	0.080606543	0.319587629	99	0.076700864	0.108382537	1	34.84509299
M7072	3B	15205844	0.08064648	0.350515464	99	0.076700864	0.108374044	1	-32.77206917
M6728	3A	715967941	0.080697657	0.340206186	99	0.076700864	0.108363168	1	101.8529346
M8409	3D	380816249	0.080697657	0.340206186	99	0.076700864	0.108363168	1	101.8529346
M4075	2B	236592763	0.080700975	0.463917526	99	0.076700864	0.108362463	1	35.15422387
M1355	1B	7319459	0.080713193	0.402061856	99	0.076700864	0.108359867	1	41.80118518
M8373	3D	108272571	0.080716052	0.463917526	99	0.076700864	0.10835926	1	34.59387681
M5174	2B	0	0.080911466	0.288659794	99	0.076700864	0.108317808	1	24.26580732
M4296	2B	627823776	0.080913931	0.288659794	99	0.076700864	0.108317286	1	45.146289
M12094	6A	3600330	0.080954937	0.237113402	99	0.076700864	0.108308602	1	30.43386241
M3662	2B	56189523	0.081012824	0.268041237	99	0.076700864	0.108296351	1	28.29922601
M10179	5A	496609102	0.081121885	0.412371134	99	0.076700864	0.108273296	1	-32.03593485
M381	1A	504702998	0.081187149	0.443298969	99	0.076700864	0.108259516	1	28.17636145
M8106	3B	0	0.081198082	0.092783505	99	0.076700864	0.108257209	1	38.91679877
M9065	4A	590854832	0.081293225	0.422680412	99	0.076700864	0.108237144	1	-44.1660269
M14492	7A	52413793	0.081471029	0.412371134	99	0.076700864	0.108199717	1	-49.26695182
M12594	6A	550966287	0.081623262	0.144329897	99	0.076700864	0.108167743	1	-33.69076922
M1983	1D	744245493	0.081668552	0.381443299	99	0.076700864	0.108158243	1	-30.2432664
M13426	6B	581550867	0.081726912	0.216494845	99	0.076700864	0.108146011	1	-26.57653752
M14215	7A	0	0.081983418	0.422680412	99	0.076700864	0.108092359	1	32.35073827
M8372	3D	68880824	0.082016695	0.226804124	99	0.076700864	0.108085412	1	32.79119642
M1363	1B	509798209	0.082118378	0.474226804	99	0.076700864	0.108064204	1	-36.65193359
M4040	2B	236170471	0.082138602	0.206185567	99	0.076700864	0.108059989	1	30.186395
M2354	2A	13437988	0.082598038	0.113402062	99	0.076700864	0.107964548	1	-46.06179508
M24	1A	3613977	0.082660102	0.432989691	99	0.076700864	0.1079517	1	30.46032097
M2228	1D	545033351	0.082808801	0.381443299	99	0.076700864	0.10792096	1	28.56859351
M773	1B	89404769	0.082853319	0.195876289	99	0.076700864	0.107911769	1	-31.23599993
M3878	2B	417215705	0.082855504	0.092783505	99	0.076700864	0.107911318	1	-41.82676757
M2960	2A	692939894	0.082937639	0.268041237	99	0.076700864	0.107894375	1	28.36764371
M5177	2B	0	0.083279882	0.268041237	99	0.076700864	0.107823974	1	26.22265667
M752	1B	12605308	0.083296727	0.12371134	99	0.076700864	0.107820517	1	35.74974846
M6155	3A	575259106	0.08339876	0.391752577	99	0.076700864	0.107799595	1	-45.39526496
M15586	7B	0	0.0834145	0.072164948	99	0.076700864	0.10779637	1	-47.56927874
M13986	6D	220740379	0.083544839	0.463917526	99	0.076700864	0.107769689	1	-35.00395959
M2962	2A	700374249	0.083582134	0.432989691	99	0.076700864	0.107762063	1	33.1200447
M12525	6A	80627731	0.083686816	0.154639175	99	0.076700864	0.107740678	1	34.27125612
M6785	3A	595019227	0.083715246	0.402061856	99	0.076700864	0.107734876	1	-37.74387453
M3557	2B	19611130	0.083746238	0.432989691	99	0.076700864	0.107728552	1	30.27366419
M9950	5A	69140651	0.083831231	0.175257732	99	0.076700864	0.107711225	1	-28.59434416
M2799	2A	296758181	0.083872401	0.134020619	99	0.076700864	0.107702838	1	34.89488923
M14517	7A	56431349	0.083873371	0.154639175	99	0.076700864	0.107702641	1	-29.21627288
M7240	3B	42562343	0.083877711	0.319587629	99	0.076700864	0.107701757	1	27.47241527
M1956	1B	260327837	0.084062704	0.371134021	99	0.076700864	0.107664132	1	31.18447427
M10746	5B	355233851	0.084086718	0.288659794	99	0.076700864	0.107659254	1	-37.53527281
M11002	5B	486082208	0.084135232	0.474226804	99	0.076700864	0.107649405	1	43.75198762
M9996	5A	55341971	0.084165658	0.06185567	99	0.076700864	0.107643232	1	-45.94180886
M6961	3B	7019221	0.084312747	0.092783505	99	0.076700864	0.107613421	1	45.38943029
M12730	6A	249993104	0.084436631	0.484536082	99	0.076700864	0.107588357	1	-32.94690255
M2375	2A	10373140	0.084524662	0.474226804	99	0.076700864	0.107570571	1	-34.1785667
M7373	3B	281007929	0.084589777	0.072164948	99	0.076700864	0.107557429	1	41.62995019
M819	1B	500146991	0.084616649	0.412371134	99	0.076700864	0.107552008	1	-27.64006826
M13215	6B	0	0.084869424	0.453608247	99	0.076700864	0.107501112	1	-35.12831297
M6309	3A	0	0.085297978	0.195876289	99	0.076700864	0.107415202	1	37.47311436
M5803	2D	738969803	0.085847335	0.443298969	99	0.076700864	0.107305768	1	39.23450401
M2998	2A	711468133	0.085978999	0.226804124	99	0.076700864	0.107279654	1	-34.57617667
M13242	6B	216629004	0.085996953	0.391752577	99	0.076700864	0.107276096	1	23.21269802
M6312	3A	69361313	0.086066703	0.474226804	99	0.076700864	0.107262284	1	30.13182162
M5541	2D	530255014	0.086080986	0.381443299	99	0.076700864	0.107259457	1	28.05422769
M13260	6B	215650786	0.086150512	0.113402062	99	0.076700864	0.107245703	1	34.62265021
M1135	1B	317186664	0.086271824	0.164948454	99	0.076700864	0.107221733	1	31.66110607
M460	1A	539427287	0.086407481	0.340206186	99	0.076700864	0.107194974	1	-24.92311712
M451	1A	0	0.086490605	0.350515464	99	0.076700864	0.1071786	1	31.4658905
M1639	1B	194538588	0.086516515	0.360824742	99	0.076700864	0.107173499	1	-34.65630491
M3991	2B	47587295	0.086522422	0.216494845	99	0.076700864	0.107172337	1	29.50209022
M4586	2B	710353117	0.086625299	0.463917526	99	0.076700864	0.107152104	1	-34.92524411
M3284	2A	799384357	0.086691373	0.443298969	99	0.076700864	0.107139123	1	26.82101305
M561	1A	570134003	0.086700752	0.422680412	99	0.076700864	0.107137281	1	26.0167533
M1132	1B	0	0.086852597	0.113402062	99	0.076700864	0.107107495	1	-39.54166047
M4875	2B	608398641	0.086954647	0.319587629	99	0.076700864	0.107087508	1	31.9217225
M6622	3A	547633295	0.087155035	0.164948454	99	0.076700864	0.107048337	1	30.5771212
M13354	6B	267503580	0.087466179	0.134020619	99	0.076700864	0.106987712	1	-34.24403533
M9852	5A	9210215	0.087504238	0.164948454	99	0.076700864	0.106980313	1	31.28552807
M11073	5B	504309024	0.087532526	0.474226804	99	0.076700864	0.106974815	1	44.76048832
M7270	3B	347855022	0.087584871	0.432989691	99	0.076700864	0.106964648	1	-24.16329254
M10060	5A	469608194	0.087666102	0.072164948	99	0.076700864	0.106948883	1	43.94173416
M3562	2B	419250206	0.08780144	0.319587629	99	0.076700864	0.106922653	1	30.05876925
M10189	5A	503430449	0.087812767	0.226804124	99	0.076700864	0.10692046	1	27.18265771
M2209	1D	475877262	0.087843315	0.484536082	99	0.076700864	0.106914546	1	34.16010176
M8825	4A	537394269	0.087888636	0.371134021	99	0.076700864	0.106905777	1	31.8307431
M7527	3B	410300351	0.087935608	0.371134021	99	0.076700864	0.106896694	1	-62.53858222
M14101	6D	462604983	0.088152089	0.24742268	99	0.076700864	0.1068549	1	-29.0465001
M1365	1B	506221877	0.088163199	0.18556701	99	0.076700864	0.106852758	1	37.10017736
M13953	6D	95594839	0.08822312	0.010309278	99	0.076700864	0.106841211	1	-105.8442566
M2952	2A	691845663	0.08822312	0.010309278	99	0.076700864	0.106841211	1	-105.8442566
M8838	4A	530834960	0.088284767	0.082474227	99	0.076700864	0.106829341	1	37.80536934
M9903	5A	36740586	0.088287325	0.463917526	99	0.076700864	0.106828849	1	-33.44868097
M11012	5B	487440576	0.088289196	0.443298969	99	0.076700864	0.106828489	1	37.17656695
M10652	5B	48311248	0.088341066	0.402061856	99	0.076700864	0.106818509	1	-42.19059945
M11904	5D	272149005	0.088443549	0.06185567	99	0.076700864	0.106798809	1	45.12433994
M3536	2B	717098488	0.088445167	0.484536082	99	0.076700864	0.106798498	1	-26.15020573
M6257	3A	471583434	0.088475477	0.412371134	99	0.076700864	0.106792677	1	-27.82163716
M4228	2B	180559587	0.08852917	0.309278351	99	0.076700864	0.10678237	1	-24.83817878
M1283	1B	392145668	0.088819124	0.360824742	99	0.076700864	0.10672683	1	-34.84103416
M11690	5B	641926536	0.08883071	0.463917526	99	0.076700864	0.106724615	1	26.57314783
M3298	2A	31477695	0.088979207	0.144329897	99	0.076700864	0.106696252	1	30.20392038
M653	1A	7014108	0.089010619	0.309278351	99	0.076700864	0.106690259	1	-25.77403244
M1721	1B	460796746	0.089044746	0.422680412	99	0.076700864	0.106683751	1	-29.21978055
M8980	4A	676492514	0.089124073	0.195876289	99	0.076700864	0.106668633	1	33.91465755
M995	1B	344338837	0.089341191	0.319587629	99	0.076700864	0.106627331	1	28.3848137
M8025	3B	300286021	0.089564032	0.371134021	99	0.076700864	0.106585056	1	-54.20458852
M8055	3B	11511729	0.089564032	0.371134021	99	0.076700864	0.106585056	1	54.20458852
M1397	1B	394705218	0.089606428	0.463917526	99	0.076700864	0.106577026	1	32.57306526
M4046	2B	278846920	0.089776037	0.494845361	99	0.076700864	0.106544943	1	-28.77548065
M5623	2D	490049382	0.089836023	0.453608247	99	0.076700864	0.106533613	1	-34.69459182
M1042	1B	57723670	0.089916538	0.030927835	99	0.076700864	0.106518417	1	-60.43889001
M1170	1B	34945936	0.089916538	0.030927835	99	0.076700864	0.106518417	1	-60.43889001
M4364	2B	540660555	0.089967088	0.463917526	99	0.076700864	0.106508885	1	-24.39290638
M10146	5A	485469964	0.090044322	0.360824742	99	0.076700864	0.106494332	1	-22.30180759
M1658	1B	73116851	0.090108192	0.278350515	99	0.076700864	0.106482308	1	-37.37842959
M9581	4B	555219147	0.090167617	0.18556701	99	0.076700864	0.106471129	1	-38.25288719
M15452	7B	583551258	0.090193107	0.329896907	99	0.076700864	0.106466336	1	-23.98747554
M1059	1B	35143791	0.090195648	0.360824742	99	0.076700864	0.106465858	1	23.13891357
M87	1A	14161158	0.090416353	0.463917526	99	0.076700864	0.106424424	1	-31.95644269
M10160	5A	446652509	0.090528775	0.494845361	99	0.076700864	0.106403361	1	-36.10673912
M1219	1B	2308496	0.090651581	0.432989691	99	0.076700864	0.106380386	1	43.71319405
M12524	6A	69225171	0.090745775	0.350515464	99	0.076700864	0.106362787	1	25.62790855
M6744	3A	716253361	0.090983847	0.278350515	99	0.076700864	0.106318396	1	23.90941312
M374	1A	500074495	0.091034699	0.041237113	99	0.076700864	0.10630893	1	-52.61495112
M2004	1D	0	0.091058698	0.350515464	99	0.076700864	0.106304465	1	-32.14104542
M9618	4B	643534047	0.091143875	0.082474227	99	0.076700864	0.106288628	1	-40.87152153
M2844	2A	532080572	0.091208668	0.474226804	99	0.076700864	0.106276593	1	-31.4115648
M8975	4A	670943022	0.091252682	0.484536082	99	0.076700864	0.106268422	1	-36.77270985
M1441	1B	29206505	0.091258989	0.164948454	99	0.076700864	0.106267252	1	37.62296255
M9750	4D	95663405	0.091395949	0.092783505	99	0.076700864	0.106241856	1	-36.74896989
M2791	2A	497439858	0.091584583	0.12371134	99	0.076700864	0.106206949	1	-31.95625874
M6272	3A	52210548	0.091597817	0.453608247	99	0.076700864	0.106204503	1	38.53361587
M2874	2A	426929805	0.091622513	0.298969072	99	0.076700864	0.106199939	1	27.17982036
M5179	2B	763798678	0.091665118	0.350515464	99	0.076700864	0.106192069	1	-27.86512209
M506	1A	546799796	0.091762196	0.381443299	99	0.076700864	0.106174153	1	23.12043926
M9808	4D	328559907	0.09182282	0.422680412	99	0.076700864	0.106162975	1	-25.08791855
M1601	1B	591090372	0.091840434	0.309278351	99	0.076700864	0.106159729	1	26.18371056
M2972	2A	705341007	0.091928557	0.020618557	99	0.076700864	0.106143498	1	-77.53622824
M1745	1B	461485520	0.092051201	0.443298969	99	0.076700864	0.106120938	1	29.10485887
M9155	4A	353560638	0.092055067	0.175257732	99	0.076700864	0.106120228	1	-39.54647868
M14518	7A	56431349	0.092238349	0.350515464	99	0.076700864	0.106086577	1	27.21184382
M1877	1B	481501570	0.092254257	0.432989691	99	0.076700864	0.10608366	1	-35.75760274
M6406	3A	541482839	0.092607531	0.360824742	99	0.076700864	0.106019019	1	30.83024502
M12717	6A	344058238	0.092609645	0.463917526	99	0.076700864	0.106018633	1	35.01613854
M8771	4A	5065562	0.092731298	0.381443299	99	0.076700864	0.105996437	1	-35.90105946
M5022	2B	593348369	0.092854789	0.309278351	99	0.076700864	0.105973938	1	-32.45980706
M12413	6A	48048270	0.092856163	0.072164948	99	0.076700864	0.105973688	1	-40.48720432
M12548	6A	517418179	0.092862987	0.463917526	99	0.076700864	0.105972446	1	-36.22067747
M14651	7A	148170476	0.092929783	0.072164948	99	0.076700864	0.105960291	1	39.5056598
M9186	4A	712151623	0.092953262	0.484536082	99	0.076700864	0.105956021	1	-39.66531629
M8369	3D	115212017	0.092975982	0.350515464	99	0.076700864	0.10595189	1	-24.20459608
M1539	1B	571445284	0.093060433	0.484536082	99	0.076700864	0.105936545	1	32.34278455
M12488	6A	358607782	0.093097919	0.072164948	99	0.076700864	0.105929739	1	-44.57142136
M9084	4A	690887990	0.093108216	0.319587629	99	0.076700864	0.10592787	1	47.88421904
M13675	6B	0	0.093271659	0.443298969	99	0.076700864	0.105898233	1	-27.11870061
M2522	2A	0	0.093338364	0.206185567	99	0.076700864	0.105886153	1	28.85906333
M7267	3B	102634320	0.09360657	0.24742268	99	0.076700864	0.105837682	1	34.48788839
M1770	1B	64478551	0.093610842	0.402061856	99	0.076700864	0.105836911	1	26.55908469
M8504	3D	603669558	0.093637557	0.237113402	99	0.076700864	0.105832091	1	-28.28629376
M7850	3B	736666462	0.0936736	0.030927835	99	0.076700864	0.105825592	1	-58.69588836
M1178	1B	58370124	0.093730862	0.030927835	99	0.076700864	0.105815271	1	59.81655687
M4087	2B	94344351	0.09376478	0.226804124	99	0.076700864	0.105809161	1	-28.82550282
M4214	2B	93016882	0.093885981	0.18556701	99	0.076700864	0.105787348	1	-27.16164686
M1048	1B	106960955	0.093896136	0.144329897	99	0.076700864	0.105785522	1	35.64257466
M1977	1D	4243757	0.093924309	0.432989691	99	0.076700864	0.105780456	1	25.08080771
M12793	6A	598854590	0.093950162	0.195876289	99	0.076700864	0.10577581	1	-29.24680137
M5157	2B	782126877	0.093984294	0.371134021	99	0.076700864	0.105769677	1	-62.35787452
M14804	7A	634800683	0.093987838	0.06185567	99	0.076700864	0.105769041	1	46.19890405
M12850	6A	608662012	0.093991926	0.474226804	99	0.076700864	0.105768306	1	35.85463668
M691	1A	491632757	0.094168042	0.391752577	99	0.076700864	0.105736705	1	-27.02731329
M8619	4A	107154792	0.094304962	0.412371134	99	0.076700864	0.105712181	1	30.44473832
M7182	3B	32277603	0.09437422	0.443298969	99	0.076700864	0.105699792	1	-39.40445456
M12278	6A	398955808	0.094407103	0.041237113	99	0.076700864	0.105693913	1	-54.76887795
M8642	4A	232157833	0.094420664	0.257731959	99	0.076700864	0.105691489	1	27.84861217
M1692	1B	625083237	0.094580672	0.092783505	99	0.076700864	0.105662919	1	-35.45975119
M12510	6A	429939083	0.094783451	0.216494845	99	0.076700864	0.105626789	1	26.38937348
M14458	7A	38327804	0.094804466	0.443298969	99	0.076700864	0.10562305	1	-30.24389725
M14444	7A	352533828	0.094856125	0.237113402	99	0.076700864	0.105613862	1	-28.72118425
M12350	6A	30867948	0.094965884	0.041237113	99	0.076700864	0.105594357	1	-52.31975553
M15241	7B	81639841	0.094968311	0.381443299	99	0.076700864	0.105593927	1	-24.5024178
M13321	6B	583152320	0.095012273	0.360824742	99	0.076700864	0.105586122	1	-28.04621829
M4079	2B	138508909	0.095100872	0.443298969	99	0.076700864	0.105570404	1	28.97309519
M2267	1D	95949764	0.095125527	0.381443299	99	0.076700864	0.105566034	1	-23.49211765
M1889	1B	673741635	0.095229847	0.494845361	99	0.076700864	0.105547554	1	29.63936364
M14362	7A	669206467	0.095434114	0.443298969	99	0.076700864	0.105511433	1	-34.53965278
M1376	1B	406036659	0.095485102	0.268041237	99	0.076700864	0.10550243	1	-30.10260827
M2938	2A	507377226	0.095495299	0.484536082	99	0.076700864	0.10550063	1	-28.757408
M2286	1D	0	0.09551421	0.474226804	99	0.076700864	0.105497293	1	-28.02152368
M1401	1B	657569825	0.095626378	0.319587629	99	0.076700864	0.105477513	1	26.46836412
M8560	4A	48889994	0.095937967	0.226804124	99	0.076700864	0.105422701	1	30.74872568
M5002	2B	71758505	0.095947311	0.18556701	99	0.076700864	0.10542106	1	-27.25685609
M11691	5B	634442505	0.096004873	0.453608247	99	0.076700864	0.105410957	1	-32.08409033
M4116	2B	416058086	0.096078457	0.154639175	99	0.076700864	0.105398051	1	30.76873084
M3735	2B	73002301	0.096168294	0.422680412	99	0.076700864	0.10538231	1	25.78933408
M8531	4A	24767404	0.096168673	0.371134021	99	0.076700864	0.105382244	1	-32.64605695
M1805	1B	565614324	0.096180229	0.216494845	99	0.076700864	0.10538022	1	-26.50871187
M13642	6B	457635925	0.096483763	0.494845361	99	0.076700864	0.105327162	1	-23.69998379
M14078	6D	0	0.096484336	0.443298969	99	0.076700864	0.105327062	1	-25.25148296
M4365	2B	135437600	0.096562887	0.072164948	99	0.076700864	0.105313362	1	-43.4717516
M3916	2B	65243708	0.096566338	0.030927835	99	0.076700864	0.10531276	1	-59.85474301
M10769	5B	75338529	0.096581986	0.381443299	99	0.076700864	0.105310033	1	-47.14481256
M2208	1D	475499558	0.09661471	0.412371134	99	0.076700864	0.10530433	1	25.94710761
M11291	5B	432894116	0.096632083	0.092783505	99	0.076700864	0.105301303	1	-44.52270056
M12212	6A	14386702	0.096722626	0.474226804	99	0.076700864	0.105285539	1	-36.94160538
M10624	5B	470106533	0.096765627	0.453608247	99	0.076700864	0.105278058	1	-29.24929877
M10683	5B	0	0.096780553	0.06185567	99	0.076700864	0.105275462	1	-41.82427612
M8550	4A	21051247	0.09684938	0.134020619	99	0.076700864	0.105263497	1	37.37985092
M9786	4D	571615679	0.096886223	0.484536082	99	0.076700864	0.105257097	1	25.68926631
M11404	5B	606667462	0.096946584	0.412371134	99	0.076700864	0.105246616	1	-38.93152129
M3722	2B	49874133	0.096961609	0.072164948	99	0.076700864	0.105244008	1	39.88960577
M11231	5B	511853816	0.097046884	0.453608247	99	0.076700864	0.105229217	1	33.58132286
M1712	1B	629063583	0.097054577	0.06185567	99	0.076700864	0.105227883	1	42.21066495
M687	1A	0	0.097176831	0.072164948	99	0.076700864	0.105206704	1	39.31824453
M9682	4B	108226085	0.097215029	0.041237113	99	0.076700864	0.105200093	1	-50.94354923
M11711	5B	656909748	0.097466285	0.12371134	99	0.076700864	0.105156677	1	38.40179118
M7082	3B	0	0.097587744	0.226804124	99	0.076700864	0.105135734	1	-28.25917516
M6085	3A	7794910	0.097596919	0.484536082	99	0.076700864	0.105134153	1	-27.88509273
M162	1A	24574724	0.097696857	0.412371134	99	0.076700864	0.105116944	1	-26.93487484
M15272	7B	85150808	0.097831727	0.360824742	99	0.076700864	0.105093751	1	-30.2150823
M9177	4A	25353003	0.097955927	0.453608247	99	0.076700864	0.105072425	1	33.16625454
M1728	1B	636134239	0.098193098	0.443298969	99	0.076700864	0.105031783	1	34.0268693
M5713	2D	610403424	0.098359501	0.12371134	99	0.076700864	0.105003332	1	-31.61090533
M14185	7A	10270141	0.09837601	0.463917526	99	0.076700864	0.105000513	1	32.65543909
M7168	3B	12472891	0.098386133	0.474226804	99	0.076700864	0.104998784	1	33.20802887
M12569	6A	531103684	0.098400594	0.412371134	99	0.076700864	0.104996315	1	37.85506506
M12281	6A	40410979	0.098532593	0.412371134	99	0.076700864	0.104973795	1	54.37383781
M3386	2A	588436341	0.098555081	0.340206186	99	0.076700864	0.104969962	1	21.45468451
M14944	7A	487298553	0.098581915	0.443298969	99	0.076700864	0.104965389	1	-26.34139028
M11303	5B	14940437	0.098681715	0.402061856	99	0.076700864	0.104948394	1	40.30970404
M15128	7A	734995323	0.098764333	0.144329897	99	0.076700864	0.10493434	1	29.76914333
M146	1A	26318658	0.098850198	0.309278351	99	0.076700864	0.104919747	1	29.83367607
M2113	1D	347395985	0.098874469	0.237113402	99	0.076700864	0.104915624	1	33.30348431
M5632	2D	611215180	0.098886679	0.474226804	99	0.076700864	0.104913551	1	-22.21346993
M9547	4B	557995494	0.098910854	0.381443299	99	0.076700864	0.104909446	1	26.03638074
M8856	4A	483683726	0.098942932	0.474226804	99	0.076700864	0.104904002	1	-21.99596251
M3608	2B	43237442	0.099346013	0.268041237	99	0.076700864	0.104835755	1	-27.55801625
M14766	7A	567030452	0.099446252	0.402061856	99	0.076700864	0.104818831	1	-39.77230058
M8356	3D	45029418	0.099490399	0.463917526	99	0.076700864	0.104811384	1	32.2595314
M3360	2A	0	0.099514274	0.350515464	99	0.076700864	0.104807357	1	-21.97269422
M6398	3A	473708936	0.099536513	0.340206186	99	0.076700864	0.104803608	1	24.30646825
M10893	5B	370732351	0.099698096	0.371134021	99	0.076700864	0.104776394	1	47.55770805
M756	1B	2358221	0.099779427	0.082474227	99	0.076700864	0.104762715	1	-38.15188041
M556	1A	556090171	0.100082778	0.309278351	99	0.076700864	0.104711802	1	22.81934633
M6283	3A	40814340	0.100136957	0.484536082	99	0.076700864	0.104702727	1	-39.49544889
M2922	2A	16885170	0.100305048	0.195876289	99	0.076700864	0.104674606	1	29.23299943
M14168	7A	8934681	0.100319022	0.103092784	99	0.076700864	0.104672271	1	-33.42464609
M10193	5A	3942824	0.100354634	0.226804124	99	0.076700864	0.104666321	1	-26.80868146
M11047	5B	94028326	0.10060641	0.463917526	99	0.076700864	0.10462432	1	-32.08781192
M3520	2B	0	0.100713149	0.216494845	99	0.076700864	0.10460655	1	24.21268355
M13125	6B	51997445	0.100767749	0.474226804	99	0.076700864	0.104597468	1	31.78178087
M10460	5A	608962342	0.100815974	0.237113402	99	0.076700864	0.104589451	1	-24.14622498
M4066	2B	296109009	0.100834579	0.474226804	99	0.076700864	0.104586359	1	25.59458303
M3133	2A	633678135	0.100923863	0.329896907	99	0.076700864	0.10457153	1	41.84303828
M655	1A	583529682	0.100939281	0.329896907	99	0.076700864	0.104568971	1	-23.72258984
M4732	2B	712361439	0.101041336	0.484536082	99	0.076700864	0.104552042	1	25.89778545
M10457	5A	614889909	0.101064994	0.484536082	99	0.076700864	0.10454812	1	28.70219297
M12565	6A	537944558	0.101091925	0.329896907	99	0.076700864	0.104543657	1	30.51388947
M6839	3A	600926479	0.101143287	0.381443299	99	0.076700864	0.104535149	1	-26.66155493
M14291	7A	16302848	0.101154137	0.453608247	99	0.076700864	0.104533352	1	-29.99760605
M15078	7A	712982088	0.101208515	0.371134021	99	0.076700864	0.104524351	1	-36.60058814
M15596	7B	654860661	0.101290972	0.12371134	99	0.076700864	0.104510712	1	-31.92961853
M2084	1D	52602336	0.101411862	0.216494845	99	0.076700864	0.104490738	1	-36.50636775
M4966	2B	753628597	0.101459515	0.134020619	99	0.076700864	0.104482872	1	-33.34554144
M10296	5A	552747794	0.101475616	0.298969072	99	0.076700864	0.104480215	1	26.85225208
M4058	2B	344404616	0.101477269	0.432989691	99	0.076700864	0.104479942	1	23.22266597
M4179	2B	75627521	0.101732008	0.360824742	99	0.076700864	0.10443797	1	-39.85046556
M2900	2A	49655671	0.101760232	0.350515464	99	0.076700864	0.104433327	1	-24.46762713
M91	1A	26426298	0.101766276	0.298969072	99	0.076700864	0.104432332	1	-29.58771563
M14530	7A	62883363	0.101856049	0.371134021	99	0.076700864	0.104417574	1	32.35500823
M8424	3D	452983655	0.101912124	0.402061856	99	0.076700864	0.104408363	1	25.78352187
M823	1B	16427758	0.101922733	0.360824742	99	0.076700864	0.104406621	1	29.47165392
M3969	2B	227089235	0.10214434	0.226804124	99	0.076700864	0.104370278	1	28.5923568
M3864	2B	0	0.102257447	0.103092784	99	0.076700864	0.104351762	1	-35.81133334
M11419	5B	536317851	0.102312836	0.432989691	99	0.076700864	0.104342703	1	29.07522899
M10469	5A	616523857	0.102503285	0.474226804	99	0.076700864	0.104311597	1	28.03678286
M4151	2B	95129435	0.102511502	0.103092784	99	0.076700864	0.104310257	1	36.43955372
M1400	1B	520682469	0.10263052	0.381443299	99	0.076700864	0.104290851	1	-22.92857467
M4028	2B	392038009	0.102689113	0.103092784	99	0.076700864	0.104281308	1	-36.11148019
M15221	7B	36484341	0.102689386	0.371134021	99	0.076700864	0.104281263	1	29.91027731
M8699	4A	412674356	0.103061271	0.309278351	99	0.076700864	0.104220829	1	-29.11184884
M9951	5A	64983046	0.103127515	0.391752577	99	0.076700864	0.10421009	1	42.35754698
M5595	2D	88591365	0.103204716	0.432989691	99	0.076700864	0.104197583	1	-37.4256332
M8943	4A	674358804	0.103216106	0.329896907	99	0.076700864	0.104195739	1	26.75202188
M1152	1B	412244460	0.103398698	0.030927835	99	0.076700864	0.104166205	1	58.05427013
M9638	4B	657180139	0.103508517	0.463917526	99	0.076700864	0.104148469	1	-29.24346084
M8671	4A	195228281	0.103547422	0.453608247	99	0.076700864	0.104142191	1	29.9483365
M8703	4A	499309926	0.103592752	0.309278351	99	0.076700864	0.10413488	1	41.60357919
M8104	3B	805555961	0.103600466	0.381443299	99	0.076700864	0.104133636	1	40.28874482
M8288	3D	9312378	0.10361947	0.206185567	99	0.076700864	0.104130572	1	33.44790342
M11162	5B	492257250	0.103631836	0.402061856	99	0.076700864	0.104128579	1	39.4782005
M496	1A	115950191	0.103663178	0.391752577	99	0.076700864	0.104123528	1	37.04000868
M5095	2B	772063506	0.103671083	0.443298969	99	0.076700864	0.104122254	1	36.15227893
M6690	3A	420562185	0.103671906	0.371134021	99	0.076700864	0.104122121	1	26.82714627
M2975	2A	573863390	0.10392616	0.474226804	99	0.076700864	0.104081212	1	-29.95976344
M9940	5A	2861753	0.10393921	0.402061856	99	0.076700864	0.104079115	1	39.68289582
M4042	2B	236170471	0.103939443	0.144329897	99	0.076700864	0.104079078	1	31.59207015
M4045	2B	278846920	0.104107452	0.494845361	99	0.076700864	0.10405211	1	29.66972072
M539	1A	701043681	0.104255989	0.412371134	99	0.076700864	0.104028309	1	28.88433748
M553	1A	623968684	0.104255989	0.412371134	99	0.076700864	0.104028309	1	28.88433748
M12566	6A	537944558	0.10427304	0.329896907	99	0.076700864	0.104025579	1	30.17390577
M12257	6A	0	0.104383932	0.422680412	99	0.076700864	0.104007837	1	-24.98680062
M9193	4A	704622078	0.104484157	0.154639175	99	0.076700864	0.10399182	1	-38.94021964
M15357	7B	243258677	0.104513025	0.309278351	99	0.076700864	0.10398721	1	24.3679493
M6050	3A	35214627	0.104572279	0.226804124	99	0.076700864	0.103977752	1	29.56752095
M6559	3A	651994615	0.104854221	0.134020619	99	0.076700864	0.103932828	1	-29.99967964
M536	1A	551910173	0.104901486	0.329896907	99	0.076700864	0.10392531	1	-23.88054614
M3497	2B	15467656	0.104958925	0.494845361	99	0.076700864	0.103916179	1	-27.90573542
M12177	6A	7708998	0.105102222	0.340206186	99	0.076700864	0.103893424	1	30.47145207
M6555	3A	648107739	0.10532029	0.474226804	99	0.076700864	0.103858861	1	32.68752334
M857	1B	36034202	0.105369886	0.381443299	99	0.076700864	0.103851011	1	-52.31367575
M6413	3A	509564298	0.105435494	0.391752577	99	0.076700864	0.103840633	1	-34.31081605
M10761	5B	383155097	0.105471104	0.463917526	99	0.076700864	0.103835004	1	38.67147001
M9143	4A	304763961	0.105489295	0.319587629	99	0.076700864	0.103832129	1	27.86461381
M14164	7A	3010352	0.10549667	0.484536082	99	0.076700864	0.103830963	1	28.42940862
M11451	5B	651409879	0.105514297	0.360824742	99	0.076700864	0.103828178	1	58.95333126
M769	1B	675284827	0.105568184	0.329896907	99	0.076700864	0.103819667	1	29.04068113
M10591	5B	18523119	0.105601243	0.340206186	99	0.076700864	0.103814448	1	-56.8216774
M6779	3A	722446569	0.105774758	0.288659794	99	0.076700864	0.103787085	1	-25.68112211
M1430	1B	18359071	0.105808239	0.463917526	99	0.076700864	0.10378181	1	21.15479687
M9969	5A	174799515	0.105870641	0.072164948	99	0.076700864	0.103771985	1	38.65252885
M1766	1B	638015288	0.105944361	0.020618557	99	0.076700864	0.103760386	1	69.74579941
M336	1A	426440396	0.105944361	0.020618557	99	0.076700864	0.103760386	1	69.74579941
M11539	5B	323804316	0.106030417	0.257731959	99	0.076700864	0.103746858	1	-30.60334967
M1581	1B	569770619	0.106075495	0.391752577	99	0.076700864	0.103739777	1	-40.65476422
M8840	4A	441981603	0.106159455	0.268041237	99	0.076700864	0.103726596	1	29.96974071
M13561	6B	322479776	0.106178267	0.381443299	99	0.076700864	0.103723644	1	-26.97200707
M8587	4A	716765921	0.106210884	0.391752577	99	0.076700864	0.103718528	1	-32.86886363
M2129	1D	244297621	0.106330356	0.484536082	99	0.076700864	0.103699802	1	-41.49956057
M2553	2A	83223921	0.106427605	0.474226804	99	0.076700864	0.103684577	1	-25.62627368
M703	1B	3572450	0.106506892	0.298969072	99	0.076700864	0.103672175	1	22.23440946
M1906	1B	676717313	0.106507872	0.288659794	99	0.076700864	0.103672022	1	-23.49808461
M14193	7A	13842196	0.106530662	0.195876289	99	0.076700864	0.103668459	1	-29.71677048
M8903	4A	674340235	0.10659427	0.226804124	99	0.076700864	0.10365852	1	-29.82723293
M936	1B	17537164	0.106627929	0.278350515	99	0.076700864	0.103653263	1	25.34836099
M3456	2B	0	0.106635389	0.474226804	99	0.076700864	0.103652098	1	30.42450489
M5691	2D	0	0.10677246	0.484536082	99	0.076700864	0.103630711	1	-28.85714051
M5344	2B	641958634	0.106837525	0.432989691	99	0.076700864	0.10362057	1	-39.63849327
M8450	3D	441240399	0.106842676	0.237113402	99	0.076700864	0.103619767	1	-29.06665492
M9376	4A	733921790	0.107035265	0.422680412	99	0.076700864	0.103589792	1	22.3294379
M13553	6B	38658891	0.107113675	0.257731959	99	0.076700864	0.103577605	1	30.20643559
M3136	2A	756929010	0.107535779	0.195876289	99	0.076700864	0.103512169	1	-26.99326582
M1876	1B	670798572	0.107560337	0.12371134	99	0.076700864	0.103508371	1	31.95554255
M9772	4D	419686606	0.107579185	0.206185567	99	0.076700864	0.103505457	1	26.60485725
M11379	5B	719383797	0.107735739	0.381443299	99	0.076700864	0.103481271	1	30.20310861
M9563	4B	526967219	0.107795058	0.18556701	99	0.076700864	0.103472117	1	-31.40685186
M1280	1B	438693323	0.107796128	0.422680412	99	0.076700864	0.103471952	1	35.94438333
M15583	7B	0	0.107883652	0.12371134	99	0.076700864	0.103458457	1	-30.63991376
M12541	6A	112907129	0.107960882	0.494845361	99	0.076700864	0.103446558	1	-30.17944849
M7029	3B	579518208	0.108520075	0.340206186	99	0.076700864	0.103360689	1	29.91078908
M11310	5B	4902436	0.108520651	0.24742268	99	0.076700864	0.1033606	1	25.32881902
M9073	4A	641838580	0.10856733	0.113402062	99	0.076700864	0.103353455	1	-31.94980755
M4682	2B	706398142	0.108660943	0.288659794	99	0.076700864	0.103339135	1	24.21638858
M2008	1D	22756049	0.108786712	0.432989691	99	0.076700864	0.103319918	1	-24.59156029
M115	1A	13940751	0.10878723	0.257731959	99	0.076700864	0.103319838	1	-24.98506381
M10089	5A	461901240	0.108794244	0.237113402	99	0.076700864	0.103318767	1	28.26584775
M817	1B	21249692	0.108901641	0.298969072	99	0.076700864	0.103302378	1	-24.88243652
M6619	3A	686200851	0.109014674	0.24742268	99	0.076700864	0.103285149	1	-33.68548893
M679	1A	590967815	0.109056491	0.360824742	99	0.076700864	0.103278779	1	-50.93417988
M758	1B	2358221	0.109062323	0.288659794	99	0.076700864	0.103277891	1	-28.02679928
M1233	1B	86102631	0.109107438	0.257731959	99	0.076700864	0.103271023	1	-24.5833549
M8917	4A	649883746	0.109202424	0.195876289	99	0.076700864	0.103256574	1	-31.19074718
M5525	2D	66312323	0.109247556	0.391752577	99	0.076700864	0.103249713	1	28.96348037
M13536	6B	653183662	0.109254969	0.494845361	99	0.076700864	0.103248586	1	22.20675293
M15446	7B	541509916	0.109265493	0.06185567	99	0.076700864	0.103246987	1	-40.58834392
M14798	7A	626324494	0.109299376	0.381443299	99	0.076700864	0.103241839	1	-26.650628
M1232	1B	86102631	0.109365655	0.257731959	99	0.076700864	0.103231775	1	-29.73923701
M15491	7B	206170311	0.109553312	0.206185567	99	0.076700864	0.103203317	1	-29.85982138
M4054	2B	238397738	0.109609981	0.175257732	99	0.076700864	0.103194733	1	-27.0365402
M6880	3A	757610977	0.109652098	0.278350515	99	0.076700864	0.103188357	1	35.14898336
M462	1A	536664269	0.109692364	0.463917526	99	0.076700864	0.103182264	1	30.04585831
M4639	2B	704429297	0.109838632	0.257731959	99	0.076700864	0.103160152	1	23.56886496
M5411	2D	22205043	0.10990709	0.144329897	99	0.076700864	0.103149813	1	-28.503217
M4020	2B	678547100	0.109928535	0.453608247	99	0.076700864	0.103146576	1	23.43575546
M7857	3B	559227303	0.10995608	0.391752577	99	0.076700864	0.10314242	1	45.2226685
M9085	4A	690887990	0.110146744	0.195876289	99	0.076700864	0.103113679	1	-29.30354463
M3462	2B	8479321	0.110356531	0.474226804	99	0.076700864	0.103082119	1	-21.56233791
M14880	7A	692280965	0.110437254	0.340206186	99	0.076700864	0.103069994	1	-56.52481138
M12479	6A	199016535	0.110443945	0.072164948	99	0.076700864	0.103068989	1	42.30266159
M1815	1B	656423079	0.110523148	0.412371134	99	0.076700864	0.103057102	1	-32.82608129
M2213	1D	475877262	0.110595743	0.443298969	99	0.076700864	0.103046215	1	-28.555944
M1984	1D	744245493	0.110619782	0.319587629	99	0.076700864	0.103042612	1	26.25616906
M11854	5B	696426421	0.110769336	0.432989691	99	0.076700864	0.103020214	1	-27.30905287
M14132	7A	4140180	0.11083709	0.319587629	99	0.076700864	0.103010079	1	23.02601248
M4662	2B	692615324	0.110902019	0.298969072	99	0.076700864	0.103000372	1	26.97722215
M8537	4A	28592618	0.111251018	0.402061856	99	0.076700864	0.102948306	1	23.62387812
M2948	2A	691845663	0.111329792	0.432989691	99	0.076700864	0.102936579	1	32.80173368
M11755	5B	678684071	0.111512594	0.412371134	99	0.076700864	0.102909402	1	-27.84135904
M8053	3B	589410123	0.111678418	0.082474227	99	0.076700864	0.102884791	1	38.66375365
M13589	6B	676372364	0.111746653	0.432989691	99	0.076700864	0.102874676	1	21.65849849
M14519	7A	56458797	0.111780329	0.350515464	99	0.076700864	0.102869687	1	-25.06215648
M2982	2A	369668866	0.111975433	0.175257732	99	0.076700864	0.102840813	1	31.44931755
M7271	3B	478901478	0.112050619	0.391752577	99	0.076700864	0.102829701	1	22.4354159
M1681	1B	619588077	0.112053828	0.484536082	99	0.076700864	0.102829227	1	28.00330812
M12637	6A	127197562	0.112079994	0.381443299	99	0.076700864	0.102825362	1	-22.60490089
M7346	3B	73851126	0.112090365	0.113402062	99	0.076700864	0.10282383	1	-32.01299414
M1737	1B	637527763	0.112090797	0.134020619	99	0.076700864	0.102823766	1	29.87091552
M215	1A	288094235	0.112182975	0.381443299	99	0.076700864	0.10281016	1	29.66446851
M3937	2B	652870583	0.112249735	0.092783505	99	0.076700864	0.102800313	1	34.97202345
M12012	5D	552080511	0.112311834	0.24742268	99	0.076700864	0.10279116	1	-24.21451152
M14330	7A	16886742	0.112333447	0.360824742	99	0.076700864	0.102787976	1	-57.83720623
M3584	2B	40945523	0.112393704	0.360824742	99	0.076700864	0.102779101	1	-25.35512899
M46	1A	267772590	0.112430126	0.463917526	99	0.076700864	0.10277374	1	22.57623822
M6207	3A	603025700	0.112441893	0.24742268	99	0.076700864	0.102772008	1	-38.01300452
M9129	4A	702149172	0.112656114	0.195876289	99	0.076700864	0.102740516	1	-29.84172624
M3161	2A	761322496	0.112658102	0.443298969	99	0.076700864	0.102740224	1	37.08278544
M9418	4A	740144144	0.112744372	0.412371134	99	0.076700864	0.102727561	1	39.49420132
M96	1A	16408364	0.112755179	0.154639175	99	0.076700864	0.102725976	1	-27.99179668
M14280	7A	13884507	0.112798705	0.402061856	99	0.076700864	0.102719592	1	38.30845486
M370	1A	502682654	0.112811021	0.041237113	99	0.076700864	0.102717786	1	48.18185177
M870	1B	9652067	0.112860428	0.340206186	99	0.076700864	0.102710543	1	-28.67098082
M5754	2D	593857786	0.112896845	0.24742268	99	0.076700864	0.102705207	1	26.79534943
M15582	7B	0	0.112914595	0.082474227	99	0.076700864	0.102702607	1	37.7185858
M10661	5B	71300457	0.112998726	0.18556701	99	0.076700864	0.10269029	1	-29.02453189
M2214	1D	475877262	0.11309197	0.175257732	99	0.076700864	0.10267665	1	-30.67523522
M1887	1B	669783975	0.113288447	0.494845361	99	0.076700864	0.102647949	1	-31.61895776
M1899	1B	675330476	0.113288447	0.494845361	99	0.076700864	0.102647949	1	-31.61895776
M12344	6A	469537832	0.113303104	0.340206186	99	0.076700864	0.102645811	1	29.36926958
M2823	2A	535417965	0.113340509	0.092783505	99	0.076700864	0.102640354	1	33.68365326
M9225	4A	729895722	0.113346498	0.432989691	99	0.076700864	0.10263948	1	23.14704295
M4331	2B	410189157	0.113348627	0.422680412	99	0.076700864	0.10263917	1	-22.38532194
M2979	2A	710269269	0.113418312	0.278350515	99	0.076700864	0.10262901	1	27.02145114
M2889	2A	20323654	0.113443961	0.381443299	99	0.076700864	0.102625272	1	-26.45182347
M2959	2A	692939894	0.113583204	0.340206186	99	0.076700864	0.102604997	1	-28.52803771
M5353	2B	763798474	0.113602071	0.12371134	99	0.076700864	0.102602252	1	-37.24331767
M7610	3B	567001218	0.11362489	0.051546392	99	0.076700864	0.102598933	1	43.57360554
M9587	4B	0	0.11373759	0.484536082	99	0.076700864	0.10258255	1	33.95120351
M4108	2B	277093048	0.113773285	0.092783505	99	0.076700864	0.102577365	1	34.0882901
M8786	4A	596971035	0.113811601	0.381443299	99	0.076700864	0.102571801	1	-46.04763779
M12358	6A	25429158	0.113825652	0.082474227	99	0.076700864	0.102569761	1	-37.04955943
M9403	4A	0	0.113843724	0.319587629	99	0.076700864	0.102567138	1	-21.57672928
M5625	2D	568465158	0.11386664	0.134020619	99	0.076700864	0.102563813	1	29.92440715
M7187	3B	209287998	0.113886944	0.484536082	99	0.076700864	0.102560867	1	31.54914604
M6614	3A	681466014	0.113905087	0.051546392	99	0.076700864	0.102558235	1	45.44446981
M3762	2B	434731139	0.113921378	0.051546392	99	0.076700864	0.102555872	1	-44.59343098
M4812	2B	742460377	0.114031596	0.268041237	99	0.076700864	0.102539897	1	25.60615336
M7397	3B	327305784	0.114250038	0.092783505	99	0.076700864	0.102508286	1	35.65606654
M4523	2B	635172360	0.114274563	0.463917526	99	0.076700864	0.102504741	1	25.86018571
M1980	1D	305817	0.114494689	0.381443299	99	0.076700864	0.102472962	1	-25.05957011
M3252	2A	759751315	0.11456245	0.154639175	99	0.076700864	0.102463193	1	-27.91948772
M8163	3B	14991361	0.114626768	0.412371134	99	0.076700864	0.102453927	1	-27.23904028
M15224	7B	60498476	0.114672095	0.412371134	99	0.076700864	0.1024474	1	-29.08376272
M7876	3B	743818770	0.114725861	0.298969072	99	0.076700864	0.102439662	1	-24.38547122
M9101	4A	695118747	0.114761799	0.360824742	99	0.076700864	0.102434492	1	-53.62359387
M14490	7A	53519554	0.114921497	0.340206186	99	0.076700864	0.10241154	1	26.62209601
M15302	7B	112021624	0.115047089	0.195876289	99	0.076700864	0.102393514	1	-30.01369974
M355	1A	487470950	0.115146916	0.371134021	99	0.076700864	0.102379203	1	-49.60497602
M735	1B	716071071	0.115157189	0.381443299	99	0.076700864	0.102377731	1	-27.36444226
M10263	5A	540039194	0.115268902	0.443298969	99	0.076700864	0.102361733	1	-30.42638188
M15520	7B	611412290	0.115300713	0.443298969	99	0.076700864	0.102357181	1	-27.38108308
M13198	6B	0	0.115301488	0.082474227	99	0.076700864	0.10235707	1	38.14256129
M11336	5B	529608885	0.115313341	0.041237113	99	0.076700864	0.102355374	1	47.99078879
M7419	3B	367482313	0.115376971	0.072164948	99	0.076700864	0.102346273	1	-37.87698556
M10051	5A	473980796	0.115412202	0.432989691	99	0.076700864	0.102341237	1	-38.30971965
M3008	2A	683749636	0.115478234	0.381443299	99	0.076700864	0.102331803	1	-21.54952161
M4965	2B	753628597	0.115497989	0.381443299	99	0.076700864	0.102328981	1	29.99830477
M3775	2B	0	0.11567049	0.298969072	99	0.076700864	0.102304367	1	-23.88247548
M7069	3B	15205844	0.115702191	0.134020619	99	0.076700864	0.102299848	1	29.07132787
M11718	5B	658559642	0.11571853	0.402061856	99	0.076700864	0.10229752	1	-28.74304619
M12747	6A	503237209	0.115783871	0.175257732	99	0.076700864	0.102288211	1	26.96616539
M7094	3B	22246636	0.115895934	0.257731959	99	0.076700864	0.102272261	1	-23.02006741
M4733	2B	712640982	0.115996001	0.391752577	99	0.076700864	0.102258033	1	-31.51200818
M534	1A	454769741	0.116068115	0.257731959	99	0.076700864	0.102247787	1	-27.22083394
M13385	6B	528330487	0.116180064	0.134020619	99	0.076700864	0.102231897	1	-30.41904037
M2860	2A	565262524	0.116182461	0.237113402	99	0.076700864	0.102231557	1	29.65437391
M1981	1D	305817	0.116188676	0.360824742	99	0.076700864	0.102230675	1	-30.61151375
M2620	2A	104921223	0.116212201	0.391752577	99	0.076700864	0.102227338	1	32.50055853
M1671	1B	628033554	0.116262606	0.350515464	99	0.076700864	0.102220191	1	-76.17422557
M10339	5A	555280221	0.116272901	0.463917526	99	0.076700864	0.102218732	1	23.68677319
M1744	1B	193426988	0.116291475	0.309278351	99	0.076700864	0.1022161	1	21.8982266
M8675	4A	232125986	0.116350581	0.360824742	99	0.076700864	0.102207726	1	-30.35195062
M15318	7B	162339083	0.116455743	0.412371134	99	0.076700864	0.102192839	1	36.18094467
M1557	1B	564574859	0.116539408	0.422680412	99	0.076700864	0.102181006	1	26.84193782
M12366	6A	24845173	0.11656071	0.020618557	99	0.076700864	0.102177994	1	75.85675201
M12352	6A	30867948	0.11656071	0.020618557	99	0.076700864	0.102177994	1	-75.85675201
M12364	6A	0	0.11656071	0.020618557	99	0.076700864	0.102177994	1	-75.85675201
M6042	3A	0	0.116648812	0.24742268	99	0.076700864	0.102165547	1	24.58454309
M10811	5B	355043560	0.1167143	0.402061856	99	0.076700864	0.102156301	1	-40.360896
M13375	6B	460540816	0.11677758	0.443298969	99	0.076700864	0.102147372	1	34.41912102
M9037	4A	657492476	0.116802094	0.432989691	99	0.076700864	0.102143915	1	23.65123517
M11189	5B	425653407	0.116852358	0.103092784	99	0.076700864	0.102136828	1	32.54976985
M7213	3B	37643831	0.116898548	0.041237113	99	0.076700864	0.102130319	1	-58.08985727
M7230	3B	0	0.116938872	0.226804124	99	0.076700864	0.102124639	1	26.30028169
M3097	2A	744286377	0.11694995	0.278350515	99	0.076700864	0.102123079	1	24.60372008
M13219	6B	142987583	0.117038136	0.453608247	99	0.076700864	0.102110666	1	31.83135353
M2907	2A	21223660	0.117127983	0.371134021	99	0.076700864	0.10209803	1	26.09271805
M7901	3B	752301746	0.117138922	0.453608247	99	0.076700864	0.102096492	1	-27.06555921
M3826	2B	587422326	0.117178868	0.175257732	99	0.076700864	0.102090878	1	-27.43866649
M14441	7A	36312068	0.117292342	0.484536082	99	0.076700864	0.102074942	1	-28.26182527
M6729	3A	0	0.117323495	0.092783505	99	0.076700864	0.10207057	1	36.67862777
M3410	2B	10661980	0.117328317	0.216494845	99	0.076700864	0.102069894	1	26.28761795
M13303	6B	471100656	0.117414213	0.463917526	99	0.076700864	0.102057847	1	29.72334639
M8520	3D	0	0.117550877	0.18556701	99	0.076700864	0.102038699	1	-31.23528199
M14246	7A	600721014	0.117575249	0.257731959	99	0.076700864	0.102035287	1	-28.24536874
M586	1A	409523520	0.117616556	0.257731959	99	0.076700864	0.102029506	1	23.69891423
M13692	6B	705927746	0.117656089	0.288659794	99	0.076700864	0.102023976	1	-27.1412567
M2359	2A	15637364	0.117722381	0.381443299	99	0.076700864	0.102014706	1	-24.33960537
M3526	2B	26309987	0.117723595	0.432989691	99	0.076700864	0.102014537	1	20.63737302
M11371	5B	362127576	0.117819123	0.412371134	99	0.076700864	0.10200119	1	49.41910994
M7351	3B	124651375	0.117896344	0.391752577	99	0.076700864	0.101990409	1	24.5684094
M14179	7A	8931917	0.117907753	0.164948454	99	0.076700864	0.101988817	1	-38.87545067
M9160	4A	708532867	0.118093769	0.175257732	99	0.076700864	0.101962884	1	35.97460639
M3371	2A	0	0.1181939	0.371134021	99	0.076700864	0.101948944	1	26.41391747
M11862	5B	700001961	0.118370547	0.216494845	99	0.076700864	0.101924382	1	34.06530684
M15569	7B	653890555	0.118427273	0.072164948	99	0.076700864	0.101916504	1	-46.19126585
M3955	2B	454777720	0.118615677	0.072164948	99	0.076700864	0.101890368	1	-36.92418442
M7157	3B	27995650	0.118676728	0.443298969	99	0.076700864	0.101881908	1	-20.06070125
M6613	3A	681466014	0.118849929	0.484536082	99	0.076700864	0.101857936	1	30.16189445
M14288	7A	0	0.118922693	0.309278351	99	0.076700864	0.101847876	1	24.90146264
M8647	4A	335898876	0.118979173	0.24742268	99	0.076700864	0.101840073	1	-31.6410616
M13552	6B	439600840	0.11899014	0.412371134	99	0.076700864	0.101838558	1	-29.6764524
M2634	2A	107180183	0.119005056	0.494845361	99	0.076700864	0.101836498	1	22.97344096
M9606	4B	602403624	0.119042152	0.371134021	99	0.076700864	0.101831376	1	-23.95864304
M11001	5B	486082208	0.119307232	0.134020619	99	0.076700864	0.10179483	1	39.40471993
M9220	4A	410117142	0.119407417	0.453608247	99	0.076700864	0.101781041	1	-22.80331404
M8648	4A	335898876	0.119625699	0.216494845	99	0.076700864	0.101751043	1	-28.70874148
M10439	5A	362054918	0.119766963	0.18556701	99	0.076700864	0.101731662	1	-27.12744566
M12492	6A	440255570	0.119804746	0.371134021	99	0.076700864	0.101726482	1	27.50712875
M9765	4D	394378216	0.119873977	0.092783505	99	0.076700864	0.101716997	1	-36.31076608
M5990	2D	644407969	0.119992558	0.072164948	99	0.076700864	0.101700764	1	40.43339268
M3475	2B	17493420	0.120017986	0.453608247	99	0.076700864	0.101697286	1	-31.25325427
M1080	1B	340462174	0.120025767	0.030927835	99	0.076700864	0.101696222	1	56.66792755
M1156	1B	487411912	0.120025767	0.030927835	99	0.076700864	0.101696222	1	56.66792755
M1182	1B	141899927	0.120025767	0.030927835	99	0.076700864	0.101696222	1	56.66792755
M1186	1B	0	0.120025767	0.030927835	99	0.076700864	0.101696222	1	56.66792755
M1112	1B	744753328	0.120025767	0.030927835	99	0.076700864	0.101696222	1	-56.66792755
M1162	1B	474121296	0.120025767	0.030927835	99	0.076700864	0.101696222	1	-56.66792755
M1206	1B	116830677	0.120025767	0.030927835	99	0.076700864	0.101696222	1	-56.66792755
M3277	2A	699803097	0.120143635	0.391752577	99	0.076700864	0.101680109	1	37.79942631
M4591	2B	655520301	0.120226524	0.298969072	99	0.076700864	0.101668789	1	-23.05279751
M10014	5A	329278691	0.120258529	0.206185567	99	0.076700864	0.101664421	1	23.81175556
M11465	5B	333414790	0.120267719	0.237113402	99	0.076700864	0.101663167	1	-26.70727784
M4667	2B	715249876	0.120331722	0.402061856	99	0.076700864	0.101654435	1	-29.7007808
M3529	2B	0	0.120367931	0.412371134	99	0.076700864	0.101649498	1	23.5588905
M11891	5D	16120485	0.120390854	0.010309278	99	0.076700864	0.101646373	1	94.93479146
M644	1A	543072796	0.120397572	0.164948454	99	0.076700864	0.101645457	1	28.52101183
M9837	5A	6179460	0.120420081	0.195876289	99	0.076700864	0.10164239	1	-25.68582925
M2080	1D	40222148	0.120688039	0.360824742	99	0.076700864	0.101605921	1	27.81040201
M6318	3A	321105083	0.1208472	0.474226804	99	0.076700864	0.101584302	1	34.87876587
M4209	2B	144565791	0.120880755	0.24742268	99	0.076700864	0.101579749	1	-24.39981023
M12095	6A	0	0.120882929	0.412371134	99	0.076700864	0.101579454	1	36.48685848
M746	1B	2431679	0.120916932	0.360824742	99	0.076700864	0.101574841	1	26.69097009
M947	1B	711939962	0.120916932	0.360824742	99	0.076700864	0.101574841	1	26.69097009
M15103	7A	731424299	0.120982477	0.443298969	99	0.076700864	0.101565953	1	36.64846378
M155	1A	25126301	0.121010771	0.360824742	99	0.076700864	0.101562118	1	23.05583217
M774	1B	89404769	0.12101742	0.237113402	99	0.076700864	0.101561217	1	33.59144885
M13297	6B	0	0.121052137	0.443298969	99	0.076700864	0.101556513	1	33.983364
M8976	4A	670943022	0.121057944	0.164948454	99	0.076700864	0.101555727	1	-34.95289284
M3711	2B	0	0.121099855	0.474226804	99	0.076700864	0.10155005	1	31.40532008
M14500	7A	82434448	0.121195894	0.391752577	99	0.076700864	0.101537052	1	-35.21745287
M9087	4A	697825160	0.121236379	0.474226804	99	0.076700864	0.101531576	1	26.07614697
M1087	1B	262945027	0.121253147	0.288659794	99	0.076700864	0.101529308	1	-36.63025598
M5187	2B	0	0.121293413	0.288659794	99	0.076700864	0.101523864	1	21.67750476
M7793	3B	732431585	0.121468476	0.051546392	99	0.076700864	0.101500221	1	-47.24335517
M9589	4B	666741486	0.121472842	0.494845361	99	0.076700864	0.101499632	1	34.35459702
M3009	2A	710104568	0.121728111	0.144329897	99	0.076700864	0.101465226	1	-26.71450687
M4001	2B	213709998	0.121792899	0.195876289	99	0.076700864	0.101456507	1	25.08480413
M5151	2B	0	0.121822755	0.422680412	99	0.076700864	0.101452491	1	22.43435264
M4109	2B	384320443	0.12202778	0.443298969	99	0.076700864	0.10142494	1	33.03018797
M14507	7A	55923161	0.122064784	0.412371134	99	0.076700864	0.101419973	1	28.12109017
M2130	1D	244297621	0.122089147	0.329896907	99	0.076700864	0.101416704	1	66.75478629
M12188	6A	10011324	0.122097747	0.082474227	99	0.076700864	0.10141555	1	52.04203594
M9067	4A	686897296	0.122100759	0.12371134	99	0.076700864	0.101415146	1	-31.20535108
M8961	4A	648906704	0.122188668	0.257731959	99	0.076700864	0.101403357	1	-27.5008426
M8576	4A	46412568	0.122333158	0.371134021	99	0.076700864	0.101384001	1	47.35395399
M8579	4A	54405419	0.122333158	0.371134021	99	0.076700864	0.101384001	1	47.35395399
M3981	2B	0	0.122359146	0.164948454	99	0.076700864	0.101380522	1	26.64313505
M6553	3A	648497655	0.122359416	0.432989691	99	0.076700864	0.101380486	1	20.06053091
M4542	2B	673051085	0.122365109	0.371134021	99	0.076700864	0.101379724	1	49.7244754
M8673	4A	232125986	0.122393632	0.381443299	99	0.076700864	0.101375907	1	-28.91114281
M9585	4B	666525732	0.122470715	0.494845361	99	0.076700864	0.101365597	1	33.41933437
M9094	4A	690916906	0.122538819	0.340206186	99	0.076700864	0.101356494	1	55.93616292
M316	1A	481243230	0.122592434	0.340206186	99	0.076700864	0.101349332	1	-24.45747164
M14917	7A	700180481	0.122751158	0.030927835	99	0.076700864	0.101328149	1	-58.30748508
M2036	1D	21254198	0.122766594	0.412371134	99	0.076700864	0.101326091	1	-24.59001828
M1372	1B	405488003	0.122777896	0.298969072	99	0.076700864	0.101324584	1	28.31760468
M6327	3A	108688443	0.122805057	0.371134021	99	0.076700864	0.101320963	1	26.98532793
M4496	2B	555576973	0.122895779	0.195876289	99	0.076700864	0.101308876	1	26.6850006
M4974	2B	46505672	0.123050219	0.144329897	99	0.076700864	0.101288322	1	-27.34960787
M3594	2B	506395762	0.123091097	0.422680412	99	0.076700864	0.101282886	1	20.18430545
M14831	7A	664701768	0.123094155	0.463917526	99	0.076700864	0.101282479	1	23.96328769
M4524	2B	635172360	0.123094843	0.360824742	99	0.076700864	0.101282388	1	-25.72416089
M13581	6B	401453670	0.123181189	0.371134021	99	0.076700864	0.101270914	1	-50.19008179
M13370	6B	157900637	0.123435616	0.371134021	99	0.076700864	0.101237156	1	-25.20901894
M211	1A	293607657	0.123510711	0.402061856	99	0.076700864	0.101227208	1	29.44451745
M8618	4A	134069682	0.123652659	0.309278351	99	0.076700864	0.101208421	1	30.8156716
M8928	4A	659678759	0.123652659	0.309278351	99	0.076700864	0.101208421	1	30.8156716
M13539	6B	657260591	0.123800661	0.453608247	99	0.076700864	0.101188859	1	27.0180303
M12832	6A	604445823	0.124008491	0.309278351	99	0.076700864	0.101161433	1	-48.24135336
M14293	7A	0	0.124026538	0.113402062	99	0.076700864	0.101159054	1	-31.95543149
M1264	1B	418051065	0.124031887	0.092783505	99	0.076700864	0.101158349	1	33.92924263
M9908	5A	36021495	0.124080275	0.340206186	99	0.076700864	0.101151972	1	23.79022829
M4663	2B	0	0.124095916	0.391752577	99	0.076700864	0.101149912	1	-28.16202228
M3458	2B	563859723	0.12429509	0.092783505	99	0.076700864	0.101123698	1	36.53419455
M13320	6B	442429891	0.124295649	0.463917526	99	0.076700864	0.101123625	1	30.34592892
M14385	7A	28691606	0.124465731	0.360824742	99	0.076700864	0.101101277	1	57.21428861
M3428	2B	227590363	0.124507805	0.494845361	99	0.076700864	0.101095754	1	24.93036765
M4425	2B	544170551	0.124584316	0.278350515	99	0.076700864	0.101085716	1	27.89009164
M10770	5B	75338529	0.124622312	0.092783505	99	0.076700864	0.101080734	1	45.6493146
M14803	7A	634800683	0.124641749	0.06185567	99	0.076700864	0.101078186	1	-41.56956617
M10716	5B	75319717	0.124663598	0.226804124	99	0.076700864	0.101075322	1	-23.40237802
M3130	2A	751661898	0.124688788	0.154639175	99	0.076700864	0.101072021	1	28.92178202
M1824	1B	671873541	0.124993812	0.164948454	99	0.076700864	0.101032111	1	-30.43755225
M1720	1B	629678307	0.125098814	0.474226804	99	0.076700864	0.101018397	1	-23.40696934
M9012	4A	77494178	0.12516991	0.350515464	99	0.076700864	0.101009119	1	66.67877236
M15556	7B	670917940	0.125176461	0.298969072	99	0.076700864	0.101008265	1	-25.59552053
M4614	2B	91473909	0.125259507	0.494845361	99	0.076700864	0.100997435	1	-25.52734567
M6897	3B	2259539	0.125385557	0.030927835	99	0.076700864	0.100981014	1	-55.45485461
M5757	2D	593851647	0.125558853	0.474226804	99	0.076700864	0.100958467	1	28.00414362
M978	1B	714373153	0.125625061	0.154639175	99	0.076700864	0.100949863	1	-29.87058202
M2857	2A	52393884	0.125739911	0.288659794	99	0.076700864	0.100934949	1	30.08885706
M7497	3B	381348475	0.125765708	0.072164948	99	0.076700864	0.100931601	1	40.28843982
M11056	5B	12275247	0.125812457	0.474226804	99	0.076700864	0.100925536	1	22.39227475
M13973	6D	85804139	0.125863255	0.422680412	99	0.076700864	0.100918949	1	21.5309147
M8944	4A	674358804	0.125951259	0.278350515	99	0.076700864	0.100907544	1	27.27575582
M6437	3A	526866497	0.12619212	0.257731959	99	0.076700864	0.100876375	1	-26.73110681
M3229	2A	760131926	0.126364812	0.412371134	99	0.076700864	0.10085407	1	34.46486655
M4896	2B	760015871	0.126379783	0.257731959	99	0.076700864	0.100852137	1	29.12633519
M3573	2B	40354316	0.126403828	0.412371134	99	0.076700864	0.100849035	1	-26.78850413
M2538	2A	0	0.12652171	0.134020619	99	0.076700864	0.100833834	1	-27.31353862
M1107	1B	403186540	0.126656112	0.020618557	99	0.076700864	0.100816522	1	67.39553687
M1138	1B	220883994	0.126699304	0.257731959	99	0.076700864	0.100810963	1	-29.3720188
M8577	4A	47648562	0.126773423	0.443298969	99	0.076700864	0.100801428	1	27.26019437
M1869	1B	665409991	0.126791671	0.360824742	99	0.076700864	0.100799082	1	-23.88776802
M14344	7A	17252435	0.126891519	0.030927835	99	0.076700864	0.100786249	1	-53.67335553
M11981	5D	549504198	0.126948339	0.474226804	99	0.076700864	0.100778952	1	33.1641574
M3465	2B	9755482	0.127035588	0.24742268	99	0.076700864	0.100767754	1	25.99169991
M12791	6A	599680412	0.127041131	0.350515464	99	0.076700864	0.100767043	1	28.69887065
M8269	3D	0	0.127260997	0.371134021	99	0.076700864	0.100738864	1	-25.11356743
M4855	2B	746141190	0.12728428	0.391752577	99	0.076700864	0.100735883	1	-27.09867172
M5536	2D	398395290	0.127400793	0.18556701	99	0.076700864	0.100720976	1	-26.14255475
M11493	5B	481184562	0.12743206	0.12371134	99	0.076700864	0.100716978	1	-29.58665829
M6777	3A	0	0.127511251	0.329896907	99	0.076700864	0.100706857	1	-39.20429447
M7218	3B	359850321	0.127524973	0.371134021	99	0.076700864	0.100705104	1	55.86890913
M11329	5B	482592815	0.127524973	0.371134021	99	0.076700864	0.100705104	1	-55.86890913
M7254	3B	38713014	0.127524973	0.371134021	99	0.076700864	0.100705104	1	-55.86890913
M3056	2A	728790463	0.127608767	0.494845361	99	0.076700864	0.100694404	1	-28.33145433
M11	1A	0	0.127613859	0.474226804	99	0.076700864	0.100693754	1	-26.39739794
M11844	5B	621241019	0.127715779	0.443298969	99	0.076700864	0.100680751	1	-24.70639619
M8071	3B	748377576	0.127817264	0.422680412	99	0.076700864	0.100667815	1	-37.33228018
M5637	2D	0	0.127848429	0.463917526	99	0.076700864	0.100663845	1	29.25163142
M783	1B	530442292	0.12787885	0.402061856	99	0.076700864	0.100659971	1	31.92896976
M1475	1B	544133182	0.127918122	0.432989691	99	0.076700864	0.100654971	1	20.57605967
M15543	7B	92684193	0.127962431	0.381443299	99	0.076700864	0.100649331	1	-31.1327211
M12414	6A	48048270	0.128070272	0.402061856	99	0.076700864	0.100635616	1	23.26548508
M12612	6A	558795265	0.128074993	0.113402062	99	0.076700864	0.100635015	1	31.19863717
M5318	2B	31519188	0.128369398	0.288659794	99	0.076700864	0.100597639	1	-39.78935296
M1894	1B	674499667	0.128430988	0.175257732	99	0.076700864	0.100589832	1	-30.80287572
M1016	1B	50019841	0.12849521	0.494845361	99	0.076700864	0.100581696	1	27.8915188
M13880	6D	5046755	0.128561007	0.360824742	99	0.076700864	0.100573366	1	-53.85241755
M15315	7B	328973458	0.128627653	0.494845361	99	0.076700864	0.100564932	1	34.6094606
M4846	2B	0	0.128660121	0.113402062	99	0.076700864	0.100560826	1	-32.57530468
M2249	1D	467861000	0.128667551	0.443298969	99	0.076700864	0.100559886	1	-26.95793747
M11126	5B	698122265	0.128752163	0.484536082	99	0.076700864	0.10054919	1	-28.6277576
M15445	7B	541509916	0.12889639	0.350515464	99	0.076700864	0.100530976	1	24.20526632
M9988	5A	333414537	0.129043516	0.309278351	99	0.076700864	0.100512421	1	26.79308533
M15595	7B	654860661	0.12920163	0.494845361	99	0.076700864	0.100492505	1	-31.48170133
M9170	4A	709851770	0.129211699	0.494845361	99	0.076700864	0.100491238	1	-41.28284852
M12335	6A	36039166	0.129305822	0.329896907	99	0.076700864	0.100479397	1	-28.20932782
M5012	2B	765033466	0.129359809	0.494845361	99	0.076700864	0.10047261	1	-28.0889072
M4605	2B	577023815	0.129397585	0.340206186	99	0.076700864	0.100467862	1	54.60436866
M1454	1B	99914122	0.129452472	0.154639175	99	0.076700864	0.100460967	1	-39.32965999
M1189	1B	444058473	0.129544474	0.072164948	99	0.076700864	0.100449417	1	36.65903352
M8644	4A	413875836	0.129604229	0.371134021	99	0.076700864	0.100441921	1	31.06201415
M1974	1D	6226459	0.129699756	0.350515464	99	0.076700864	0.100429944	1	-27.5090722
M7083	3B	15205844	0.1298347	0.195876289	99	0.076700864	0.100413043	1	-28.63594322
M22	1A	2276875	0.129837849	0.278350515	99	0.076700864	0.100412649	1	-21.16390341
M778	1B	0	0.129844914	0.113402062	99	0.076700864	0.100411765	1	29.80199131
M3586	2B	40530085	0.129852371	0.288659794	99	0.076700864	0.100410831	1	22.11735136
M14390	7A	29550908	0.129870846	0.402061856	99	0.076700864	0.100408519	1	22.50580212
M8107	3B	295465304	0.129872847	0.432989691	99	0.076700864	0.100408269	1	-32.68546955
M5622	2D	110910233	0.129885064	0.113402062	99	0.076700864	0.10040674	1	29.9789393
M12580	6A	530215873	0.130061406	0.237113402	99	0.076700864	0.100384694	1	30.56112753
M13082	6B	14792085	0.130108868	0.237113402	99	0.076700864	0.100378766	1	30.33994823
M12709	6A	462272539	0.130134655	0.412371134	99	0.076700864	0.100375546	1	35.68863121
M9062	4A	4271248	0.13068664	0.453608247	99	0.076700864	0.100306798	1	30.36782707
M2880	2A	607155053	0.13069904	0.422680412	99	0.076700864	0.100305257	1	-27.82314277
M6364	3A	531631181	0.130737312	0.371134021	99	0.076700864	0.100300503	1	25.25704776
M905	1B	210395910	0.130752345	0.257731959	99	0.076700864	0.100298636	1	-24.39346198
M2992	2A	710105092	0.130821987	0.494845361	99	0.076700864	0.100289991	1	-27.99662918
M11396	5B	548956394	0.130824762	0.360824742	99	0.076700864	0.100289647	1	-20.63904916
M15168	7B	5055043	0.13086605	0.18556701	99	0.076700864	0.100284524	1	23.60912968
M267	1A	339927631	0.130876016	0.319587629	99	0.076700864	0.100283287	1	54.70593544
M3660	2B	33241377	0.130892886	0.494845361	99	0.076700864	0.100281195	1	-28.32358732
M5649	2D	744783890	0.130956911	0.144329897	99	0.076700864	0.100273256	1	-28.47322449
M81	1A	531630305	0.131011291	0.164948454	99	0.076700864	0.100266517	1	25.25193005
M14386	7A	28691606	0.131016049	0.134020619	99	0.076700864	0.100265927	1	-30.66276189
M11651	5B	610081540	0.13103685	0.463917526	99	0.076700864	0.10026335	1	-31.06230324
M8745	4A	478288955	0.131106079	0.381443299	99	0.076700864	0.100254777	1	-29.07480339
M5711	2D	570998838	0.131146653	0.443298969	99	0.076700864	0.100249755	1	29.49788437
M8044	3B	228195974	0.131212015	0.340206186	99	0.076700864	0.100241669	1	91.13159306
M7093	3B	22246636	0.131223299	0.216494845	99	0.076700864	0.100240273	1	-27.33005816
M7212	3B	0	0.131356767	0.422680412	99	0.076700864	0.100223776	1	-27.41382281
M8538	4A	28592618	0.131424732	0.443298969	99	0.076700864	0.100215383	1	25.71712796
M10447	5A	612915484	0.131441888	0.474226804	99	0.076700864	0.100213265	1	-30.2369495
M12182	6A	7997688	0.131501484	0.402061856	99	0.076700864	0.10020591	1	-22.38162011
M5155	2B	782126877	0.131529153	0.340206186	99	0.076700864	0.100202497	1	32.7783723
M9982	5A	59566378	0.131591024	0.484536082	99	0.076700864	0.100194867	1	28.47201971
M11105	5B	511603033	0.131681979	0.474226804	99	0.076700864	0.100183659	1	-28.8226933
M7150	3B	24929087	0.131686432	0.268041237	99	0.076700864	0.10018311	1	26.78893891
M13254	6B	134284790	0.131753555	0.391752577	99	0.076700864	0.100174844	1	25.31821234
M13269	6B	0	0.131753555	0.391752577	99	0.076700864	0.100174844	1	-25.31821234
M2104	1D	384056978	0.131788785	0.453608247	99	0.076700864	0.100170508	1	-35.36434863
M7992	3B	816555648	0.131913998	0.329896907	99	0.076700864	0.100155106	1	-24.68704119
M13987	6D	235134627	0.131916098	0.226804124	99	0.076700864	0.100154848	1	-28.44642447
M2940	2A	657300532	0.131952974	0.18556701	99	0.076700864	0.100150315	1	-27.89492907
M4375	2B	309304504	0.131996797	0.257731959	99	0.076700864	0.10014493	1	-27.69061448
M4923	2B	679742409	0.132267546	0.360824742	99	0.076700864	0.100111707	1	-26.71467643
M3045	2A	542655244	0.132291796	0.360824742	99	0.076700864	0.100108735	1	-23.94493762
M5614	2D	565128626	0.132467855	0.154639175	99	0.076700864	0.100087176	1	-26.4610281
M9050	4A	655668912	0.132495891	0.144329897	99	0.076700864	0.100083746	1	-29.5018748
M53	1A	43336699	0.132625107	0.422680412	99	0.076700864	0.100067948	1	20.45802741
M12110	6A	5129073	0.13266323	0.360824742	99	0.076700864	0.100063291	1	52.87717052
M15296	7B	88580166	0.132780925	0.453608247	99	0.076700864	0.100048921	1	29.18349855
M8945	4A	91210964	0.132973541	0.432989691	99	0.076700864	0.100025435	1	20.22625126
M15589	7B	648660809	0.133080919	0.391752577	99	0.076700864	0.10001236	1	-43.39618556
M11170	5B	91679153	0.133166832	0.010309278	99	0.076700864	0.100001906	1	89.92623103
M3712	2B	0	0.133166832	0.010309278	99	0.076700864	0.100001906	1	-89.92623103
M11936	5D	472425065	0.133270413	0.092783505	99	0.076700864	0.099989314	1	34.72542516
M5696	2D	712007919	0.133425722	0.195876289	99	0.076700864	0.099970453	1	-25.45859554
M1819	1B	346227510	0.133556772	0.463917526	99	0.076700864	0.099954557	1	-37.93399213
M5032	2B	562205678	0.133575052	0.268041237	99	0.076700864	0.099952341	1	-24.97036883
M10644	5B	72083499	0.133619429	0.257731959	99	0.076700864	0.099946963	1	26.49062227
M7438	3B	166284603	0.133656217	0.474226804	99	0.076700864	0.099942507	1	25.96921435
M10273	5A	546308192	0.133707422	0.175257732	99	0.076700864	0.099936306	1	-25.93033002
M1955	1B	260327837	0.133894211	0.340206186	99	0.076700864	0.099913709	1	-27.48205885
M1705	1B	548442351	0.133966738	0.484536082	99	0.076700864	0.099904945	1	28.57291806
M5190	2B	784264087	0.134065293	0.103092784	99	0.076700864	0.099893044	1	30.65873519
M1199	1B	0	0.134076592	0.319587629	99	0.076700864	0.09989168	1	43.15351089
M14487	7A	50010206	0.134146387	0.298969072	99	0.076700864	0.099883259	1	-32.31371161
M1558	1B	564574859	0.134268142	0.350515464	99	0.076700864	0.09986858	1	-23.48847178
M7129	3B	25803087	0.134495971	0.164948454	99	0.076700864	0.099841154	1	33.67016451
M956	1B	630186255	0.134523227	0.175257732	99	0.076700864	0.099837876	1	31.07671193
M5356	2B	791958920	0.134550596	0.103092784	99	0.076700864	0.099834586	1	37.18152623
M9319	4A	336207656	0.134580226	0.443298969	99	0.076700864	0.099831024	1	33.34496692
M12533	6A	623438271	0.134683133	0.453608247	99	0.076700864	0.099818662	1	-33.01425212
M14640	7A	131108912	0.134729032	0.391752577	99	0.076700864	0.099813152	1	38.95636768
M12556	6A	39131835	0.134831401	0.422680412	99	0.076700864	0.09980087	1	29.34126105
M1754	1B	636316329	0.134884085	0.041237113	99	0.076700864	0.099794553	1	-46.22483081
M10032	5A	436890364	0.134892522	0.278350515	99	0.076700864	0.099793542	1	23.25695212
M9937	5A	79264462	0.135026936	0.371134021	99	0.076700864	0.099777439	1	-19.42982423
M9315	4A	336207656	0.135057499	0.484536082	99	0.076700864	0.099773781	1	-31.86951389
M14180	7A	8931917	0.135105296	0.103092784	99	0.076700864	0.099768061	1	30.50882367
M6770	3A	0	0.13513959	0.164948454	99	0.076700864	0.099763958	1	24.41670691
M3763	2B	91596926	0.135156384	0.06185567	99	0.076700864	0.099761949	1	-38.56493624
M9429	4A	439294228	0.135230071	0.412371134	99	0.076700864	0.099753139	1	-28.98240659
M3065	2A	732893513	0.135286269	0.412371134	99	0.076700864	0.099746424	1	-25.62166161
M14569	7A	27346450	0.135376081	0.360824742	99	0.076700864	0.099735698	1	-28.84791499
M14335	7A	0	0.13541015	0.278350515	99	0.076700864	0.099731632	1	-26.29340982
M12532	6A	623438271	0.135434792	0.453608247	99	0.076700864	0.099728691	1	25.98648879
M4884	2B	589523538	0.135518343	0.237113402	99	0.076700864	0.099718725	1	28.81950063
M3998	2B	0	0.135556728	0.134020619	99	0.076700864	0.099714149	1	-28.03932689
M9552	4B	594693866	0.136074836	0.494845361	99	0.076700864	0.099652526	1	32.14786831
M9583	4B	618159692	0.136074836	0.494845361	99	0.076700864	0.099652526	1	-32.14786831
M9602	4B	490329940	0.136074836	0.494845361	99	0.076700864	0.099652526	1	-32.14786831
M9619	4B	502382967	0.136074836	0.494845361	99	0.076700864	0.099652526	1	-32.14786831
M2597	2A	73531960	0.136230678	0.381443299	99	0.076700864	0.099634042	1	-30.78512476
M10618	5B	323956274	0.136371606	0.402061856	99	0.076700864	0.099617348	1	20.37892797
M987	1B	577431009	0.136379805	0.195876289	99	0.076700864	0.099616378	1	24.115653
M13350	6B	248510675	0.136450435	0.350515464	99	0.076700864	0.099608019	1	-25.77498001
M1160	1B	480841623	0.136505846	0.041237113	99	0.076700864	0.099601465	1	-45.99724689
M9137	4A	23511186	0.136510583	0.443298969	99	0.076700864	0.099600905	1	-31.07784395
M3862	2B	0	0.136530553	0.113402062	99	0.076700864	0.099598543	1	-32.83995088
M6279	3A	40144585	0.136556964	0.463917526	99	0.076700864	0.099595421	1	-26.91573111
M5596	2D	88591365	0.136632138	0.463917526	99	0.076700864	0.099586538	1	20.839679
M8661	4A	176342807	0.136638804	0.041237113	99	0.076700864	0.099585751	1	46.04738452
M9576	4B	15752078	0.136644054	0.237113402	99	0.076700864	0.09958513	1	-25.06649944
M12539	6A	449964305	0.136749975	0.484536082	99	0.076700864	0.099572625	1	-27.04319799
M13702	6B	710012309	0.136843125	0.268041237	99	0.076700864	0.099561636	1	-26.57680194
M7331	3B	47283315	0.136967819	0.103092784	99	0.076700864	0.099546939	1	31.36081273
M13223	6B	157131092	0.136981448	0.422680412	99	0.076700864	0.099545334	1	-29.05782849
M10103	5A	467383563	0.137053469	0.453608247	99	0.076700864	0.099536853	1	-24.18635706
M1538	1B	568960943	0.137175375	0.474226804	99	0.076700864	0.09952251	1	-23.82932
M6450	3A	0	0.137266319	0.463917526	99	0.076700864	0.099511819	1	20.71780395
M7197	3B	35473244	0.137297434	0.154639175	99	0.076700864	0.099508163	1	-29.44400415
M13291	6B	230607608	0.137319519	0.319587629	99	0.076700864	0.099505568	1	24.7251716
M5354	2B	763798474	0.13738467	0.12371134	99	0.076700864	0.099497918	1	36.14431012
M5826	2D	588434693	0.137475076	0.443298969	99	0.076700864	0.099487309	1	33.04179903
M745	1B	2431679	0.137592937	0.288659794	99	0.076700864	0.099473489	1	26.46223559
M7523	3B	60366248	0.137760288	0.268041237	99	0.076700864	0.099453891	1	-22.27163416
M6084	3A	15780588	0.137970767	0.484536082	99	0.076700864	0.099429279	1	27.02780451
M1629	1B	588295288	0.137993148	0.329896907	99	0.076700864	0.099426665	1	-20.84519367
M194	1A	489600357	0.138388232	0.484536082	99	0.076700864	0.099380591	1	-23.41132184
M15599	7B	0	0.138470164	0.474226804	99	0.076700864	0.099371056	1	-31.11120481
M259	1A	387811947	0.138647357	0.319587629	99	0.076700864	0.099350454	1	86.26999677
M48	1A	0	0.138686164	0.432989691	99	0.076700864	0.099345947	1	-24.67939409
M4198	2B	151482156	0.138701766	0.082474227	99	0.076700864	0.099344135	1	-33.87122881
M14672	7A	143811597	0.138795596	0.072164948	99	0.076700864	0.099333243	1	-38.34010043
M15190	7B	89311430	0.138811569	0.072164948	99	0.076700864	0.099331389	1	37.87391596
M1904	1B	680160129	0.138859679	0.288659794	99	0.076700864	0.099325809	1	21.5450883
M8096	3B	41929763	0.138912462	0.350515464	99	0.076700864	0.099319688	1	-22.55610688
M169	1A	2874382	0.138916677	0.402061856	99	0.076700864	0.0993192	1	29.42170788
M4061	2B	0	0.138937596	0.319587629	99	0.076700864	0.099316775	1	-22.62670755
M736	1B	716071071	0.139101029	0.113402062	99	0.076700864	0.099297845	1	29.55304482
M12259	6A	16376378	0.139219945	0.422680412	99	0.076700864	0.099284088	1	-34.88355264
M4765	2B	599789141	0.139308373	0.412371134	99	0.076700864	0.099273866	1	31.36735502
M311	1A	362317345	0.139464569	0.288659794	99	0.076700864	0.099255829	1	-34.58817305
M8103	3B	805555961	0.139510772	0.134020619	99	0.076700864	0.099250498	1	26.44836501
M457	1A	537889233	0.139522387	0.298969072	99	0.076700864	0.099249158	1	-21.60181294
M8174	3B	42802772	0.139614449	0.24742268	99	0.076700864	0.099238543	1	23.98267909
M13669	6B	698461241	0.139634081	0.350515464	99	0.076700864	0.09923628	1	-21.23882451
M13257	6B	0	0.139673357	0.463917526	99	0.076700864	0.099231754	1	-29.25864609
M10676	5B	153502375	0.139685265	0.422680412	99	0.076700864	0.099230382	1	24.94957813
M12327	6A	0	0.139688421	0.309278351	99	0.076700864	0.099230019	1	-38.9740194
M15153	7A	739414265	0.139789496	0.412371134	99	0.076700864	0.099218381	1	39.02894214
M3670	2B	598294949	0.139804665	0.329896907	99	0.076700864	0.099216635	1	25.94311785
M8666	4A	125344732	0.139816482	0.329896907	99	0.076700864	0.099215275	1	61.29253076
M9699	4B	669910281	0.140006313	0.371134021	99	0.076700864	0.099193447	1	24.52895377
M15384	7B	451187047	0.140039617	0.020618557	99	0.076700864	0.099189621	1	72.93691529
M2140	1D	688816452	0.140039617	0.020618557	99	0.076700864	0.099189621	1	72.93691529
M15430	7B	535456944	0.140039617	0.020618557	99	0.076700864	0.099189621	1	-72.93691529
M9068	4A	686897296	0.14006961	0.278350515	99	0.076700864	0.099186177	1	36.83832529
M8603	4A	5349394	0.140109602	0.288659794	99	0.076700864	0.099181585	1	-25.84415904
M14882	7A	692500947	0.140142889	0.030927835	99	0.076700864	0.099177764	1	-52.76921025
M7109	3B	22915822	0.140171109	0.494845361	99	0.076700864	0.099174526	1	-29.10482952
M452	1A	0	0.14025418	0.175257732	99	0.076700864	0.099164997	1	27.4756872
M15379	7B	458724766	0.140355449	0.278350515	99	0.076700864	0.09915339	1	25.10226231
M5645	2D	593683763	0.140355687	0.134020619	99	0.076700864	0.099153363	1	27.68841167
M2516	2A	261223513	0.140514253	0.237113402	99	0.076700864	0.099135208	1	28.66768869
M13773	6B	713496209	0.140529236	0.288659794	99	0.076700864	0.099133493	1	30.9451641
M13200	6B	127471412	0.140676555	0.103092784	99	0.076700864	0.099116649	1	32.40590113
M3418	2B	454848925	0.140769097	0.288659794	99	0.076700864	0.099106078	1	-21.81573476
M479	1A	541984000	0.140843754	0.484536082	99	0.076700864	0.099097556	1	30.49907793
M2895	2A	0	0.140992751	0.432989691	99	0.076700864	0.099080563	1	-20.43764436
M10757	5B	429171723	0.141056277	0.051546392	99	0.076700864	0.099073324	1	42.03959812
M7086	3B	702849155	0.141121146	0.329896907	99	0.076700864	0.099065936	1	22.54285192
M552	1A	42812462	0.141225094	0.381443299	99	0.076700864	0.099054106	1	-24.97482008
M7605	3B	562403156	0.141232439	0.381443299	99	0.076700864	0.09905327	1	35.5558018
M9273	4A	720885307	0.141253179	0.412371134	99	0.076700864	0.099050911	1	-23.64825877
M1917	1B	679383844	0.141290321	0.329896907	99	0.076700864	0.099046687	1	-30.08965049
M11975	5D	546924756	0.141391897	0.381443299	99	0.076700864	0.099035142	1	21.61052269
M5940	2D	620909947	0.141444533	0.278350515	99	0.076700864	0.099029163	1	20.81603821
M7171	3B	41138847	0.141478101	0.474226804	99	0.076700864	0.099025352	1	-29.12405961
M7214	3B	37643831	0.141587176	0.381443299	99	0.076700864	0.099012973	1	-46.67486376
M3729	2B	78873105	0.141749035	0.412371134	99	0.076700864	0.098994625	1	38.366301
M5191	2B	790748904	0.141788397	0.134020619	99	0.076700864	0.098990167	1	-31.02077083
M2204	1D	433140936	0.141942551	0.237113402	99	0.076700864	0.09897272	1	-21.79134478
M13647	6B	699020779	0.142008906	0.381443299	99	0.076700864	0.098965216	1	-24.4607067
M15510	7B	8867615	0.142087604	0.350515464	99	0.076700864	0.098956322	1	60.97475901
M15523	7B	591698895	0.142087604	0.350515464	99	0.076700864	0.098956322	1	60.97475901
M15495	7B	607525751	0.142087604	0.350515464	99	0.076700864	0.098956322	1	-60.97475901
M2743	2A	188730587	0.142093567	0.463917526	99	0.076700864	0.098955649	1	-32.24072557
M3345	2A	767310246	0.14211883	0.144329897	99	0.076700864	0.098952795	1	26.57192952
M2981	2A	369668866	0.142123135	0.474226804	99	0.076700864	0.098952309	1	29.09530837
M2971	2A	705341007	0.142123135	0.474226804	99	0.076700864	0.098952309	1	-29.09530837
M13134	6B	64739569	0.14216361	0.092783505	99	0.076700864	0.098947738	1	31.91495927
M6335	3A	369293414	0.142232358	0.082474227	99	0.076700864	0.098939978	1	33.66754597
M8452	3D	543684499	0.142258112	0.237113402	99	0.076700864	0.098937072	1	-24.60924373
M1561	1B	573008421	0.142258489	0.412371134	99	0.076700864	0.098937029	1	21.04312666
M6082	3A	15086099	0.142316989	0.226804124	99	0.076700864	0.098930431	1	-25.96027971
M10351	5A	549670301	0.142362897	0.082474227	99	0.076700864	0.098925255	1	-37.17410301
M9045	4A	658343323	0.142555933	0.340206186	99	0.076700864	0.098903511	1	-29.35671389
M1428	1B	18359071	0.142744488	0.144329897	99	0.076700864	0.098882304	1	-42.10491529
M7178	3B	29498622	0.142793965	0.350515464	99	0.076700864	0.098876745	1	-62.35584035
M13594	6B	673827435	0.142793965	0.350515464	99	0.076700864	0.098876745	1	62.35584035
M10950	5B	526866057	0.142977993	0.463917526	99	0.076700864	0.098856087	1	20.97458309
M12815	6A	602752656	0.142998203	0.237113402	99	0.076700864	0.09885382	1	-23.29095155
M12678	6A	584911912	0.143182416	0.494845361	99	0.076700864	0.098833174	1	21.32857882
M15191	7B	89311430	0.143249123	0.092783505	99	0.076700864	0.098825706	1	-33.24098107
M14388	7A	702331405	0.143253485	0.381443299	99	0.076700864	0.098825217	1	-42.22899928
M14394	7A	29138301	0.143253485	0.381443299	99	0.076700864	0.098825217	1	-42.22899928
M6818	3A	728057245	0.143267006	0.092783505	99	0.076700864	0.098823704	1	-30.84228478
M1171	1B	32481951	0.14329496	0.350515464	99	0.076700864	0.098820576	1	45.89373054
M7258	3B	38722483	0.143356381	0.268041237	99	0.076700864	0.098813705	1	24.12302216
M14687	7A	252720433	0.143470824	0.030927835	99	0.076700864	0.098800912	1	52.37335869
M6080	3A	0	0.143562209	0.072164948	99	0.076700864	0.098790705	1	35.78434394
M8837	4A	530834960	0.14365444	0.206185567	99	0.076700864	0.098780411	1	-27.03589594
M8853	4A	301817649	0.14365444	0.206185567	99	0.076700864	0.098780411	1	-27.03589594
M4574	2B	480582074	0.143901536	0.381443299	99	0.076700864	0.098752869	1	22.43402054
M9612	4B	627811268	0.143924383	0.257731959	99	0.076700864	0.098750325	1	-23.30337401
M14142	7A	0	0.143945135	0.288659794	99	0.076700864	0.098748015	1	-25.0240312
M2215	1D	435046048	0.144020469	0.412371134	99	0.076700864	0.098739632	1	-24.01768053
M13386	6B	528330487	0.144057246	0.422680412	99	0.076700864	0.098735541	1	-35.09568153
M9431	4A	2055214	0.144249924	0.422680412	99	0.076700864	0.098714129	1	36.13877874
M2897	2A	25070004	0.144259218	0.371134021	99	0.076700864	0.098713097	1	26.49986004
M6540	3A	662527377	0.144286974	0.288659794	99	0.076700864	0.098710015	1	20.54529647
M634	1A	481012178	0.144329226	0.422680412	99	0.076700864	0.098705325	1	21.07788351
M2986	2A	568886852	0.144411061	0.432989691	99	0.076700864	0.098696247	1	-26.29026198
M14796	7A	626955964	0.144541672	0.030927835	99	0.076700864	0.098681769	1	50.86062093
M6316	3A	60005414	0.144774724	0.154639175	99	0.076700864	0.098655973	1	24.63815632
M10754	5B	388587448	0.145083961	0.237113402	99	0.076700864	0.098621818	1	26.98182303
M3854	2B	76988444	0.145268135	0.381443299	99	0.076700864	0.098601515	1	28.98939418
M582	1A	0	0.14527308	0.381443299	99	0.076700864	0.098600971	1	-24.04511778
M7139	3B	23857659	0.145282288	0.371134021	99	0.076700864	0.098599956	1	65.65721536
M9553	4B	554966424	0.145289072	0.494845361	99	0.076700864	0.098599209	1	32.51582008
M8350	3D	41746632	0.145450171	0.030927835	99	0.076700864	0.098581477	1	52.04587029
M3483	2B	18819155	0.14546478	0.432989691	99	0.076700864	0.098579871	1	29.70152239
M5829	2D	588434693	0.145466377	0.12371134	99	0.076700864	0.098579695	1	31.93881454
M5830	2D	588434693	0.145466377	0.12371134	99	0.076700864	0.098579695	1	-31.93881454
M3601	2B	162967131	0.145516081	0.402061856	99	0.076700864	0.098574229	1	-25.08465513
M5305	2B	799258848	0.145535044	0.18556701	99	0.076700864	0.098572145	1	-25.93915156
M15143	7A	113229613	0.14559461	0.484536082	99	0.076700864	0.098565599	1	-26.82653913
M4860	2B	23317360	0.145721359	0.278350515	99	0.076700864	0.098551679	1	-27.18629782
M4807	2B	736110500	0.145721359	0.278350515	99	0.076700864	0.098551679	1	27.18629782
M2872	2A	557403153	0.145963945	0.154639175	99	0.076700864	0.098525078	1	25.1391603
M1496	1B	563066992	0.146031326	0.226804124	99	0.076700864	0.098517697	1	22.19922774
M1164	1B	22864252	0.146183588	0.113402062	99	0.076700864	0.098501035	1	29.16625208
M9342	4A	742751401	0.146183867	0.422680412	99	0.076700864	0.098501005	1	18.36307802
M8363	3D	436621773	0.146231998	0.216494845	99	0.076700864	0.098495742	1	28.14335453
M3177	2A	758417987	0.146268836	0.402061856	99	0.076700864	0.098491715	1	-21.76191537
M2884	2A	585814477	0.146281017	0.288659794	99	0.076700864	0.098490384	1	24.84187721
M5926	2D	608375215	0.146335166	0.18556701	99	0.076700864	0.098484468	1	25.87982989
M540	1A	701043681	0.146520759	0.24742268	99	0.076700864	0.098464209	1	24.90937667
M4821	2B	730646221	0.146579738	0.453608247	99	0.076700864	0.098457777	1	-29.04540224
M12575	6A	524836376	0.146781059	0.391752577	99	0.076700864	0.098435844	1	-37.7356009
M13822	6B	0	0.146805253	0.360824742	99	0.076700864	0.098433211	1	40.39753401
M10990	5B	584276433	0.146902464	0.309278351	99	0.076700864	0.098422635	1	-23.1707099
M9986	5A	72230055	0.14714218	0.206185567	99	0.076700864	0.098396589	1	26.11184884
M10476	5A	613714336	0.147211736	0.164948454	99	0.076700864	0.098389041	1	26.53031604
M2241	1D	462396004	0.147223663	0.144329897	99	0.076700864	0.098387747	1	25.44785835
M13168	6B	89695899	0.147224593	0.422680412	99	0.076700864	0.098387646	1	-35.33537683
M4668	2B	715249876	0.147315963	0.298969072	99	0.076700864	0.098377738	1	-26.1421685
M9761	4D	347481014	0.147340453	0.226804124	99	0.076700864	0.098375083	1	-25.55843899
M9374	4A	6793449	0.147366083	0.154639175	99	0.076700864	0.098372306	1	29.67358732
M6851	3A	726993854	0.147377206	0.474226804	99	0.076700864	0.0983711	1	18.52209689
M2764	2A	489635273	0.147391957	0.371134021	99	0.076700864	0.098369502	1	26.85483315
M8539	4A	17023815	0.147529359	0.494845361	99	0.076700864	0.098354624	1	27.05096402
M10622	5B	4826033	0.147542024	0.134020619	99	0.076700864	0.098353253	1	30.07818074
M1806	1B	565614324	0.147587413	0.288659794	99	0.076700864	0.098348342	1	22.00774315
M11846	5B	549656486	0.147678984	0.206185567	99	0.076700864	0.09833844	1	33.35122137
M11848	5B	551093854	0.147842699	0.237113402	99	0.076700864	0.098320754	1	27.72004681
M9227	4A	731340115	0.147855383	0.381443299	99	0.076700864	0.098319385	1	-24.79624438
M9310	4A	719934001	0.147925598	0.268041237	99	0.076700864	0.098311807	1	22.81255245
M454	1A	537889263	0.147932077	0.175257732	99	0.076700864	0.098311108	1	-31.91088794
M3515	2B	26885100	0.148058139	0.360824742	99	0.076700864	0.098297514	1	-33.88004141
M3146	2A	755740514	0.148073125	0.391752577	99	0.076700864	0.098295899	1	40.3726919
M6132	3A	0	0.148073139	0.463917526	99	0.076700864	0.098295897	1	-25.32223705
M5570	2D	472861352	0.148152836	0.463917526	99	0.076700864	0.098287311	1	-25.6316767
M1398	1B	394705218	0.148279144	0.175257732	99	0.076700864	0.098273714	1	30.72656912
M8485	3D	575631870	0.148339955	0.371134021	99	0.076700864	0.098267173	1	53.42472433
M11234	5B	527149386	0.148486334	0.195876289	99	0.076700864	0.098251439	1	30.2685927
M2211	1D	475877262	0.148537457	0.402061856	99	0.076700864	0.098245948	1	24.94345556
M14494	7A	50364370	0.148700933	0.030927835	99	0.076700864	0.098228404	1	-56.89536056
M7873	3B	743137062	0.148700933	0.030927835	99	0.076700864	0.098228404	1	-56.89536056
M7888	3B	750359764	0.148700933	0.030927835	99	0.076700864	0.098228404	1	-56.89536056
M8328	3D	38148388	0.148700933	0.030927835	99	0.076700864	0.098228404	1	-56.89536056
M4572	2B	398349905	0.148862959	0.144329897	99	0.076700864	0.098211038	1	26.76352994
M2212	1D	475877262	0.148878938	0.257731959	99	0.076700864	0.098209327	1	-25.23232573
M15581	7B	0	0.148902843	0.412371134	99	0.076700864	0.098206767	1	34.6115068
M11463	5B	243695786	0.148913017	0.494845361	99	0.076700864	0.098205678	1	24.42914301
M1553	1B	47996789	0.149103669	0.402061856	99	0.076700864	0.098185279	1	-24.08403342
M4716	2B	717090293	0.149185484	0.402061856	99	0.076700864	0.098176534	1	25.42595557
M7007	3B	0	0.149194976	0.494845361	99	0.076700864	0.09817552	1	-29.35915697
M8398	3D	226198112	0.149222919	0.288659794	99	0.076700864	0.098172535	1	23.82313134
M7229	3B	0	0.149282825	0.18556701	99	0.076700864	0.098166138	1	26.65408054
M8262	3D	6060550	0.14935769	0.484536082	99	0.076700864	0.098158147	1	28.37969044
M6055	3A	0	0.149405318	0.484536082	99	0.076700864	0.098153065	1	-25.14993098
M10050	5A	475372989	0.14944429	0.412371134	99	0.076700864	0.098148909	1	-27.8972149
M9783	4D	64192874	0.14965047	0.371134021	99	0.076700864	0.09812694	1	-25.79822488
M1674	1B	454462764	0.149667074	0.484536082	99	0.076700864	0.098125172	1	-26.86001843
M4640	2B	704429297	0.149673047	0.329896907	99	0.076700864	0.098124537	1	-23.93794689
M8162	3B	817331152	0.149747472	0.453608247	99	0.076700864	0.098116616	1	-20.97698215
M2854	2A	423291292	0.149780043	0.030927835	99	0.076700864	0.098113152	1	-51.69108993
M781	1B	344369943	0.149829157	0.319587629	99	0.076700864	0.098107929	1	26.0920261
M7176	3B	28804833	0.149848771	0.484536082	99	0.076700864	0.098105843	1	-19.0350053
M9379	4A	0	0.149895604	0.268041237	99	0.076700864	0.098100866	1	-28.7926862
M567	1A	567987926	0.149967414	0.381443299	99	0.076700864	0.098093237	1	-20.8855277
M13107	6B	24914373	0.149984287	0.371134021	99	0.076700864	0.098091445	1	-21.88415165
M10593	5B	19729352	0.150110534	0.443298969	99	0.076700864	0.098078044	1	-34.93000306
M13352	6B	188000081	0.150212161	0.216494845	99	0.076700864	0.098067267	1	-26.82724599
M8382	3D	149912090	0.150228374	0.340206186	99	0.076700864	0.098065548	1	21.12308231
M749	1B	12374383	0.150239315	0.371134021	99	0.076700864	0.098064388	1	-25.38563952
M1985	1D	127835880	0.150265964	0.329896907	99	0.076700864	0.098061564	1	-30.25847924
M1221	1B	0	0.150413032	0.432989691	99	0.076700864	0.098045989	1	-40.04475955
M12152	6A	62668951	0.150630577	0.082474227	99	0.076700864	0.098022981	1	32.40311277
M8394	3D	250050869	0.150942204	0.463917526	99	0.076700864	0.09799009	1	-25.93952162
M9538	4B	529563926	0.150984098	0.443298969	99	0.076700864	0.097985674	1	30.28164323
M7687	3B	0	0.151079866	0.443298969	99	0.076700864	0.097975584	1	29.29706355
M5057	2B	764073687	0.151104719	0.278350515	99	0.076700864	0.097972967	1	-25.56473611
M3404	2B	798223	0.151135159	0.206185567	99	0.076700864	0.097969763	1	22.65978256
M14950	7A	430047444	0.151282475	0.432989691	99	0.076700864	0.097954264	1	20.42932912
M13990	6D	149883876	0.151325197	0.463917526	99	0.076700864	0.097949772	1	33.68809024
M13390	6B	263724280	0.151367798	0.463917526	99	0.076700864	0.097945295	1	27.248913
M10801	5B	326118903	0.151501337	0.319587629	99	0.076700864	0.09793127	1	-26.16825929
M1115	1B	574486838	0.151527309	0.226804124	99	0.076700864	0.097928543	1	-25.12914728
M759	1B	13027114	0.151550468	0.381443299	99	0.076700864	0.097926113	1	23.19927297
M10109	5A	351863234	0.151604948	0.371134021	99	0.076700864	0.097920397	1	-32.28570634
M5749	2D	588454274	0.151816464	0.484536082	99	0.076700864	0.097898228	1	26.95834786
M10190	5A	503430449	0.151973581	0.237113402	99	0.076700864	0.097881784	1	-22.46206092
M12323	6A	19266268	0.152001899	0.391752577	99	0.076700864	0.097878822	1	-25.97811798
M7695	3B	669426645	0.152138107	0.103092784	99	0.076700864	0.097864585	1	29.60519975
M99	1A	16408364	0.152288318	0.494845361	99	0.076700864	0.097848902	1	25.12580383
M12385	6A	0	0.152366946	0.391752577	99	0.076700864	0.097840699	1	-29.73516101
M5203	2B	124972475	0.152422246	0.381443299	99	0.076700864	0.097834933	1	-44.53286679
M12951	6A	614505042	0.152560841	0.309278351	99	0.076700864	0.097820493	1	24.32127944
M7504	3B	414366969	0.152612259	0.082474227	99	0.076700864	0.097815139	1	-34.43157277
M2819	2A	559553702	0.152615784	0.134020619	99	0.076700864	0.097814772	1	25.99051403
M11191	5B	492622619	0.152901222	0.350515464	99	0.076700864	0.097785091	1	-27.52578378
M6133	3A	430569956	0.152928047	0.350515464	99	0.076700864	0.097782305	1	-23.80951655
M13428	6B	531523075	0.153132805	0.309278351	99	0.076700864	0.097761058	1	21.48381404
M12251	6A	16598099	0.153513298	0.484536082	99	0.076700864	0.09772166	1	-29.63839186
M9565	4B	607638063	0.153644918	0.453608247	99	0.076700864	0.097708058	1	26.07947038
M15277	7B	106862437	0.153686504	0.453608247	99	0.076700864	0.097703763	1	19.08367258
M2508	2A	562686750	0.153737494	0.278350515	99	0.076700864	0.097698499	1	-30.83506703
M9719	4D	580089641	0.15376976	0.443298969	99	0.076700864	0.097695169	1	-30.58043682
M1243	1B	89236847	0.153774268	0.329896907	99	0.076700864	0.097694704	1	46.08062404
M10248	5A	538581590	0.153852196	0.226804124	99	0.076700864	0.097686664	1	24.16501267
M13263	6B	313149294	0.153896698	0.422680412	99	0.076700864	0.097682076	1	-29.08813628
M13278	6B	515290485	0.154298681	0.154639175	99	0.076700864	0.097640694	1	-26.65527298
M12863	6A	611334867	0.154319612	0.216494845	99	0.076700864	0.097638542	1	-29.88832699
M10919	5B	455980608	0.154391952	0.092783505	99	0.076700864	0.09763111	1	36.39650823
M2514	2A	32886859	0.154458348	0.391752577	99	0.076700864	0.097624292	1	-22.02454464
M12557	6A	524866973	0.154534525	0.329896907	99	0.076700864	0.097616473	1	23.70937096
M9195	4A	135164375	0.154709966	0.453608247	99	0.076700864	0.097598483	1	36.44150635
M8503	3D	603669558	0.154773067	0.402061856	99	0.076700864	0.097592018	1	-35.18174787
M11877	5B	712050597	0.154801063	0.463917526	99	0.076700864	0.097589151	1	28.09027925
M6285	3A	695818860	0.154857031	0.371134021	99	0.076700864	0.097583421	1	-44.21220787
M9103	4A	694752965	0.154860498	0.371134021	99	0.076700864	0.097583066	1	45.96079261
M3631	2B	286756395	0.154870115	0.298969072	99	0.076700864	0.097582081	1	40.6316067
M3823	2B	587422326	0.154976064	0.494845361	99	0.076700864	0.097571241	1	-21.50763568
M10358	5A	513747652	0.155022288	0.237113402	99	0.076700864	0.097566515	1	21.35277115
M5357	2B	791958920	0.155119446	0.350515464	99	0.076700864	0.097556585	1	-25.4903753
M5	1A	4213864	0.155319661	0.12371134	99	0.076700864	0.097536146	1	27.50685527
M10008	5A	393257332	0.15537123	0.268041237	99	0.076700864	0.097530886	1	-27.24921085
M10361	5A	567939050	0.15539287	0.412371134	99	0.076700864	0.09752868	1	35.56258563
M8254	3D	16234201	0.15539629	0.226804124	99	0.076700864	0.097528331	1	27.41016236
M8287	3D	9312378	0.15539629	0.226804124	99	0.076700864	0.097528331	1	-27.41016236
M2931	2A	690962390	0.155447867	0.195876289	99	0.076700864	0.097523073	1	28.71606101
M7665	3B	618741721	0.15552268	0.12371134	99	0.076700864	0.097515451	1	31.52455651
M4219	2B	592403905	0.155652784	0.422680412	99	0.076700864	0.097502205	1	21.73305531
M8481	3D	577409526	0.155701191	0.340206186	99	0.076700864	0.09749728	1	-50.18908321
M1793	1B	643950881	0.15579102	0.484536082	99	0.076700864	0.097488146	1	26.27388247
M9219	4A	410117142	0.155925506	0.453608247	99	0.076700864	0.097474481	1	-34.98070228
M8097	3B	702728099	0.156081806	0.453608247	99	0.076700864	0.097458617	1	-24.48525313
M3396	2B	8311033	0.156303582	0.422680412	99	0.076700864	0.097436139	1	21.68762818
M648	1A	584104138	0.156303888	0.309278351	99	0.076700864	0.097436108	1	-18.92369411
M9248	4A	718920407	0.156438207	0.412371134	99	0.076700864	0.097422512	1	-27.11510619
M14306	7A	6803153	0.156443772	0.206185567	99	0.076700864	0.097421949	1	-21.80099705
M7895	3B	211212780	0.156444486	0.298969072	99	0.076700864	0.097421877	1	-20.34556742
M3912	2B	63622881	0.156856653	0.12371134	99	0.076700864	0.097380242	1	-27.01571199
M6747	3A	716847034	0.156977232	0.164948454	99	0.076700864	0.097368086	1	-24.61421709
M6208	3A	603025700	0.157022188	0.319587629	99	0.076700864	0.097363557	1	20.89502293
M13360	6B	205236003	0.157027183	0.381443299	99	0.076700864	0.097363054	1	22.96636791
M6987	3B	678556767	0.157027189	0.288659794	99	0.076700864	0.097363053	1	24.10676914
M4897	2B	757067597	0.157037988	0.432989691	99	0.076700864	0.097361965	1	22.66898576
M1897	1B	674933891	0.157070965	0.268041237	99	0.076700864	0.097358644	1	-22.06150454
M1085	1B	67020984	0.157118348	0.360824742	99	0.076700864	0.097353873	1	52.15272102
M1181	1B	141899927	0.157118348	0.360824742	99	0.076700864	0.097353873	1	52.15272102
M1209	1B	357640984	0.157118348	0.360824742	99	0.076700864	0.097353873	1	52.15272102
M1116	1B	574486838	0.157118348	0.360824742	99	0.076700864	0.097353873	1	-52.15272102
M1149	1B	382251665	0.157118348	0.360824742	99	0.076700864	0.097353873	1	-52.15272102
M1169	1B	34945936	0.157118348	0.360824742	99	0.076700864	0.097353873	1	-52.15272102
M1205	1B	116830677	0.157118348	0.360824742	99	0.076700864	0.097353873	1	-52.15272102
M10178	5A	494455396	0.157193504	0.432989691	99	0.076700864	0.09734631	1	22.65260817
M11343	5B	548988047	0.157266642	0.030927835	99	0.076700864	0.097338953	1	-54.11146231
M11355	5B	328787467	0.157266642	0.030927835	99	0.076700864	0.097338953	1	-54.11146231
M13724	6B	462318879	0.157361127	0.422680412	99	0.076700864	0.097329455	1	-19.5133645
M11674	5B	631373208	0.157523269	0.226804124	99	0.076700864	0.097313172	1	-23.90604621
M15489	7B	600657278	0.157525219	0.474226804	99	0.076700864	0.097312976	1	-28.79536859
M13909	6D	10760221	0.157536688	0.309278351	99	0.076700864	0.097311825	1	-26.62888634
M8744	4A	536854630	0.157615507	0.051546392	99	0.076700864	0.097303917	1	-40.1909907
M1240	1B	488834383	0.157625676	0.391752577	99	0.076700864	0.097302897	1	21.27474777
M8064	3B	748377632	0.157628878	0.103092784	99	0.076700864	0.097302576	1	-32.25646126
M12481	6A	525593773	0.157639748	0.030927835	99	0.076700864	0.097301486	1	53.40718743
M9642	4B	509511919	0.157659835	0.154639175	99	0.076700864	0.097299472	1	24.97485277
M767	1B	558269337	0.157681573	0.298969072	99	0.076700864	0.097297292	1	21.80076578
M5208	2B	776263331	0.157710189	0.154639175	99	0.076700864	0.097294424	1	-26.5174386
M12126	6A	5129543	0.157729266	0.494845361	99	0.076700864	0.097292512	1	-21.08411752
M7882	3B	740106785	0.157782923	0.092783505	99	0.076700864	0.097287135	1	29.82990237
M8278	3D	0	0.157937432	0.484536082	99	0.076700864	0.097271666	1	-19.98147821
M9567	4B	441057932	0.15814191	0.175257732	99	0.076700864	0.09725122	1	-32.25889411
M7265	3B	47202036	0.15821632	0.237113402	99	0.076700864	0.097243788	1	-24.96655498
M13544	6B	355769259	0.158350922	0.237113402	99	0.076700864	0.097230353	1	-26.06834768
M1379	1B	444421058	0.158367815	0.350515464	99	0.076700864	0.097228667	1	21.12349211
M8737	4A	534555874	0.158414823	0.484536082	99	0.076700864	0.097223979	1	21.98685594
M9891	5A	31132290	0.158515532	0.257731959	99	0.076700864	0.097213941	1	20.56822037
M7195	3B	0	0.158546354	0.206185567	99	0.076700864	0.09721087	1	23.60889439
M689	1A	592499382	0.158589852	0.216494845	99	0.076700864	0.097206537	1	-25.95087891
M9623	4B	0	0.158659975	0.340206186	99	0.076700864	0.097199555	1	25.95769705
M7418	3B	400288793	0.158774535	0.391752577	99	0.076700864	0.097188157	1	36.93512374
M8310	3D	27672263	0.158779746	0.092783505	99	0.076700864	0.097187639	1	30.87586933
M8482	3D	577409526	0.158852283	0.24742268	99	0.076700864	0.097180427	1	24.4313587
M8554	4A	6919003	0.158971693	0.494845361	99	0.076700864	0.097168563	1	-19.28555553
M12978	6B	9275778	0.159008813	0.463917526	99	0.076700864	0.097164877	1	30.8132684
M8410	3D	380816249	0.159064171	0.06185567	99	0.076700864	0.097159381	1	36.60112325
M1130	1B	75840479	0.15913995	0.309278351	99	0.076700864	0.097151863	1	-32.67290555
M10592	5B	18523119	0.159149599	0.113402062	99	0.076700864	0.097150906	1	33.22232163
M8549	4A	21051247	0.159171006	0.494845361	99	0.076700864	0.097148783	1	30.52180421
M1657	1B	73116851	0.15922032	0.113402062	99	0.076700864	0.097143893	1	29.667128
M7026	3B	15100130	0.159272771	0.474226804	99	0.076700864	0.097138694	1	18.68802427
M149	1A	27753403	0.159283483	0.484536082	99	0.076700864	0.097137633	1	-23.31312036
M9022	4A	656904182	0.159305133	0.226804124	99	0.076700864	0.097135488	1	-25.39743693
M128	1A	16933203	0.159415819	0.226804124	99	0.076700864	0.097124526	1	23.71317474
M3606	2B	163007189	0.159545277	0.463917526	99	0.076700864	0.097111717	1	19.91067639
M3108	2A	740354177	0.15955524	0.237113402	99	0.076700864	0.097110731	1	21.81927404
M5023	2B	23306994	0.159561698	0.412371134	99	0.076700864	0.097110093	1	-25.84018028
M7137	3B	21184949	0.159576818	0.443298969	99	0.076700864	0.097108598	1	34.83858923
M6652	3A	506259895	0.159584062	0.072164948	99	0.076700864	0.097107881	1	34.3699691
M3717	2B	77176639	0.159586106	0.402061856	99	0.076700864	0.097107679	1	38.7912144
M3908	2B	976743	0.159634395	0.051546392	99	0.076700864	0.097102906	1	38.66034402
M12032	5D	711579175	0.159649853	0.371134021	99	0.076700864	0.097101378	1	-36.37919757
M10810	5B	408227848	0.159678797	0.412371134	99	0.076700864	0.097098518	1	33.33049254
M11347	5B	441021557	0.159745197	0.113402062	99	0.076700864	0.097091959	1	28.8000262
M3330	2A	765631505	0.159939683	0.237113402	99	0.076700864	0.097072765	1	21.07131048
M1952	1B	260327837	0.159995247	0.443298969	99	0.076700864	0.097067287	1	21.151051
M7159	3B	27998611	0.160010334	0.309278351	99	0.076700864	0.0970658	1	20.48460669
M15159	7B	673044	0.160115612	0.391752577	99	0.076700864	0.097055426	1	39.34434891
M10464	5A	491796631	0.160175046	0.195876289	99	0.076700864	0.097049574	1	-24.57604351
M13551	6B	439600840	0.160200528	0.226804124	99	0.076700864	0.097047065	1	-28.05868327
M4728	2B	712642131	0.160300458	0.18556701	99	0.076700864	0.097037232	1	22.97823615
M12919	6A	0	0.160412498	0.402061856	99	0.076700864	0.097026216	1	35.94899213
M8674	4A	232125986	0.160447126	0.340206186	99	0.076700864	0.097022813	1	-22.01720431
M863	1B	5609496	0.160453836	0.350515464	99	0.076700864	0.097022154	1	21.36466497
M7681	3B	490515716	0.160655173	0.381443299	99	0.076700864	0.097002386	1	-22.33527574
M5358	2B	791958920	0.160712916	0.278350515	99	0.076700864	0.096996722	1	26.24112003
M7496	3B	335094862	0.160901117	0.216494845	99	0.076700864	0.096978278	1	22.47541071
M12713	6A	583292509	0.160930245	0.494845361	99	0.076700864	0.096975425	1	22.01099885
M10719	5B	328244838	0.160957451	0.103092784	99	0.076700864	0.096972762	1	35.67954891
M4264	2B	328673302	0.161079409	0.319587629	99	0.076700864	0.096960827	1	20.64064681
M6931	3B	5760912	0.161101238	0.391752577	99	0.076700864	0.096958693	1	19.69498992
M9140	4A	701884398	0.161108697	0.164948454	99	0.076700864	0.096957963	1	38.13439109
M15388	7B	446996734	0.161122243	0.103092784	99	0.076700864	0.096956638	1	29.32533939
M3681	2B	628972455	0.161168756	0.422680412	99	0.076700864	0.096952091	1	-34.24165954
M4304	2B	216469247	0.161219786	0.360824742	99	0.076700864	0.096947104	1	-18.81371582
M13965	6D	27046183	0.161254623	0.422680412	99	0.076700864	0.0969437	1	-32.74048842
M8843	4A	180859936	0.16137881	0.360824742	99	0.076700864	0.096931574	1	-19.22787489
M9213	4A	14301407	0.161443028	0.288659794	99	0.076700864	0.096925307	1	25.45277161
M11971	5D	531606683	0.161580938	0.494845361	99	0.076700864	0.09691186	1	-19.13291015
M1468	1B	0	0.161583633	0.164948454	99	0.076700864	0.096911597	1	-27.35640713
M5240	2B	31519188	0.161591655	0.371134021	99	0.076700864	0.096910816	1	-39.76247466
M12772	6A	714489935	0.161658929	0.494845361	99	0.076700864	0.096904261	1	-22.94562361
M6020	3A	9212189	0.161667166	0.144329897	99	0.076700864	0.096903459	1	28.66442038
M12172	6A	13385387	0.16190976	0.309278351	99	0.076700864	0.09687985	1	-26.60495045
M432	1A	585075445	0.162119675	0.350515464	99	0.076700864	0.096859455	1	-19.7676755
M5243	2B	796598273	0.162163604	0.298969072	99	0.076700864	0.096855191	1	-39.59814719
M12028	5D	0	0.162314758	0.030927835	99	0.076700864	0.096840528	1	-50.31237204
M10890	5B	367689148	0.162427689	0.474226804	99	0.076700864	0.096829584	1	26.52619587
M8376	3D	73446859	0.162617893	0.474226804	99	0.076700864	0.096811171	1	20.53436769
M4568	2B	545270114	0.162831015	0.226804124	99	0.076700864	0.096790568	1	-20.24825039
M1493	1B	556106058	0.162888763	0.432989691	99	0.076700864	0.096784992	1	-23.79545476
M1872	1B	573243014	0.162895232	0.144329897	99	0.076700864	0.096784367	1	-25.66926494
M14822	7A	642899306	0.162934459	0.226804124	99	0.076700864	0.09678058	1	-23.53110628
M12267	6A	219188654	0.163097759	0.453608247	99	0.076700864	0.096764827	1	25.16213914
M8455	3D	546706726	0.163290067	0.257731959	99	0.076700864	0.096746298	1	-24.32541114
M8939	4A	673929919	0.163418867	0.432989691	99	0.076700864	0.096733903	1	31.96525438
M5412	2D	22205043	0.163621476	0.329896907	99	0.076700864	0.096714428	1	25.0201805
M7183	3B	30016583	0.1638865	0.443298969	99	0.076700864	0.096688995	1	18.76764619
M2196	1D	420566675	0.163988815	0.206185567	99	0.076700864	0.096679189	1	25.4701393
M15087	7A	719960289	0.16413355	0.103092784	99	0.076700864	0.096665329	1	28.44958285
M3664	2B	59764104	0.164170749	0.051546392	99	0.076700864	0.09666177	1	-42.65404808
M1550	1B	566170601	0.1643216	0.257731959	99	0.076700864	0.096647344	1	22.87484088
M7089	3B	22917259	0.164343205	0.103092784	99	0.076700864	0.096645279	1	-30.1622714
M5334	2B	403182706	0.164502365	0.360824742	99	0.076700864	0.096630077	1	-35.20652971
M1146	1B	37570116	0.164571075	0.175257732	99	0.076700864	0.096623519	1	-26.71358073
M13748	6B	711703518	0.164778676	0.494845361	99	0.076700864	0.096603726	1	22.73157131
M15407	7B	508801043	0.164796225	0.494845361	99	0.076700864	0.096602054	1	27.39812357
M11527	5B	562983853	0.164875985	0.329896907	99	0.076700864	0.096594458	1	-23.19368214
M11586	5B	686989852	0.164878363	0.154639175	99	0.076700864	0.096594232	1	-25.05908379
M8617	4A	134069682	0.164881427	0.391752577	99	0.076700864	0.09659394	1	-38.18189821
M4661	2B	692615324	0.164910965	0.381443299	99	0.076700864	0.096591128	1	23.06814017
M1812	1B	653681729	0.164926634	0.206185567	99	0.076700864	0.096589637	1	24.83030828
M15270	7B	97381806	0.165025739	0.422680412	99	0.076700864	0.096580208	1	21.71214107
M3967	2B	176172344	0.165192221	0.391752577	99	0.076700864	0.096564384	1	21.53627748
M1213	1B	111837904	0.165231092	0.309278351	99	0.076700864	0.096560692	1	32.45462081
M10392	5A	513747862	0.16538533	0.144329897	99	0.076700864	0.096546051	1	-25.02662641
M8354	3D	42679365	0.165408013	0.329896907	99	0.076700864	0.0965439	1	-60.7373035
M7508	3B	47059876	0.165517143	0.422680412	99	0.076700864	0.096533552	1	-17.55967933
M10653	5B	48874275	0.165564644	0.134020619	99	0.076700864	0.096529051	1	-30.67308468
M13302	6B	158998373	0.165617763	0.391752577	99	0.076700864	0.096524019	1	-20.2419569
M6408	3A	535727949	0.165656844	0.443298969	99	0.076700864	0.096520318	1	-36.07109431
M8081	3B	793011311	0.165766994	0.113402062	99	0.076700864	0.096509892	1	26.4888214
M6769	3A	0	0.165908767	0.402061856	99	0.076700864	0.096496485	1	33.43992443
M4579	2B	0	0.1659177	0.134020619	99	0.076700864	0.096495641	1	-25.51515206
M1267	1B	16380140	0.165966189	0.113402062	99	0.076700864	0.096491059	1	28.37942924
M1009	1B	39514123	0.16608754	0.020618557	99	0.076700864	0.096479598	1	68.21709385
M1224	1B	0	0.16608754	0.020618557	99	0.076700864	0.096479598	1	68.21709385
M15462	7B	592534782	0.166087955	0.298969072	99	0.076700864	0.096479559	1	21.6776997
M4159	2B	154633225	0.166234802	0.494845361	99	0.076700864	0.096465703	1	26.34165039
M8535	4A	17889469	0.166366474	0.278350515	99	0.076700864	0.096453291	1	28.95915335
M15140	7A	736414481	0.166425684	0.175257732	99	0.076700864	0.096447714	1	-22.23608571
M15044	7A	712720093	0.166460104	0.103092784	99	0.076700864	0.096444473	1	28.96011955
M7848	3B	701892192	0.1665148	0.113402062	99	0.076700864	0.096439324	1	-30.09167739
M8035	3B	768723678	0.166563061	0.164948454	99	0.076700864	0.096434782	1	24.29936429
M10884	5B	520209151	0.166611172	0.309278351	99	0.076700864	0.096430256	1	22.67042948
M8375	3D	73446859	0.166620174	0.237113402	99	0.076700864	0.096429409	1	-23.61707808
M12253	6A	71319035	0.166686841	0.422680412	99	0.076700864	0.096423141	1	39.73803609
M12179	6A	724139212	0.166686841	0.422680412	99	0.076700864	0.096423141	1	-39.73803609
M12209	6A	471614870	0.166686841	0.422680412	99	0.076700864	0.096423141	1	-39.73803609
M1328	1B	377799612	0.166796629	0.144329897	99	0.076700864	0.096412823	1	-26.40980276
M2955	2A	606635188	0.167012073	0.298969072	99	0.076700864	0.096392601	1	22.58643351
M13518	6B	635173407	0.1670756	0.381443299	99	0.076700864	0.096386643	1	24.48943437
M538	1A	469979060	0.167083569	0.494845361	99	0.076700864	0.096385896	1	19.13071311
M15275	7B	106140066	0.167119947	0.340206186	99	0.076700864	0.096382486	1	-20.76495804
M2549	2A	0	0.167213031	0.309278351	99	0.076700864	0.096373765	1	-20.62090029
M14305	7A	6803153	0.167294985	0.195876289	99	0.076700864	0.096366091	1	21.79974243
M6704	3A	711688085	0.167394292	0.092783505	99	0.076700864	0.096356798	1	30.53918039
M5176	2B	0	0.167411028	0.474226804	99	0.076700864	0.096355232	1	20.00662556
M6231	3A	305876520	0.16741982	0.329896907	99	0.076700864	0.09635441	1	20.38336402
M5603	2D	551361616	0.1675125	0.484536082	99	0.076700864	0.096345744	1	25.01803453
M6440	3A	456437080	0.167703393	0.412371134	99	0.076700864	0.096327913	1	24.99799144
M6240	3A	465870969	0.167727289	0.329896907	99	0.076700864	0.096325683	1	35.53205497
M15570	7B	653890555	0.167875029	0.402061856	99	0.076700864	0.096311901	1	-39.59852428
M395	1A	504090014	0.168014452	0.268041237	99	0.076700864	0.096298908	1	26.22913531
M383	1A	504702998	0.168014452	0.268041237	99	0.076700864	0.096298908	1	-26.22913531
M5965	2D	27005186	0.168143148	0.350515464	99	0.076700864	0.096286926	1	27.5037052
M4437	2B	658484745	0.168202858	0.309278351	99	0.076700864	0.09628137	1	18.59078865
M15268	7B	74300485	0.168351121	0.422680412	99	0.076700864	0.096267585	1	24.26541195
M4672	2B	697716067	0.168368185	0.360824742	99	0.076700864	0.096266	1	22.77692829
M10237	5A	535141926	0.168379383	0.206185567	99	0.076700864	0.096264959	1	-22.53523405
M8966	4A	328716746	0.168382278	0.164948454	99	0.076700864	0.09626469	1	28.06919052
M490	1A	544077626	0.16858931	0.412371134	99	0.076700864	0.096245469	1	-18.83681888
M7078	3B	20999249	0.168624198	0.237113402	99	0.076700864	0.096242232	1	-23.36739954
M1784	1B	557155175	0.168720979	0.268041237	99	0.076700864	0.096233259	1	19.06582099
M7985	3B	760719226	0.168744176	0.030927835	99	0.076700864	0.096231109	1	-53.79172933
M8798	4A	601140082	0.168836224	0.12371134	99	0.076700864	0.09622258	1	-26.83528153
M4643	2B	697713344	0.168970461	0.237113402	99	0.076700864	0.096210153	1	-22.58409286
M4554	2B	632566016	0.169124614	0.463917526	99	0.076700864	0.096195897	1	28.82971743
M8465	3D	553331262	0.169149874	0.494845361	99	0.076700864	0.096193562	1	-29.78344352
M4052	2B	188510198	0.169474167	0.474226804	99	0.076700864	0.096163625	1	-25.80207268
M12584	6A	553941354	0.169517106	0.298969072	99	0.076700864	0.096159666	1	25.35970853
M4282	2B	464298677	0.169539137	0.226804124	99	0.076700864	0.096157635	1	-21.25507144
M4043	2B	250520151	0.169584003	0.453608247	99	0.076700864	0.0961535	1	25.41432493
M9556	4B	0	0.169663756	0.175257732	99	0.076700864	0.096146153	1	-29.07203141
M9614	4B	497897632	0.169663756	0.175257732	99	0.076700864	0.096146153	1	-29.07203141
M5870	2D	239757106	0.169709934	0.319587629	99	0.076700864	0.096141901	1	-21.16991738
M7647	3B	597784664	0.169809796	0.216494845	99	0.076700864	0.096132711	1	28.28992537
M739	1B	7160074	0.170113849	0.134020619	99	0.076700864	0.096104767	1	26.01005178
M842	1B	6202602	0.170225813	0.371134021	99	0.076700864	0.096094491	1	26.97205661
M1530	1B	564653541	0.170258898	0.484536082	99	0.076700864	0.096091456	1	-22.71805648
M3528	2B	27010782	0.170289916	0.288659794	99	0.076700864	0.096088612	1	19.74399578
M4773	2B	732350878	0.170385621	0.432989691	99	0.076700864	0.096079839	1	29.85706178
M2229	1D	330701339	0.170409983	0.154639175	99	0.076700864	0.096077606	1	28.5262012
M813	1B	0	0.170473112	0.340206186	99	0.076700864	0.096071823	1	30.08027643
M10785	5B	219642946	0.170494725	0.463917526	99	0.076700864	0.096069844	1	26.84318909
M9877	5A	429945514	0.170526063	0.360824742	99	0.076700864	0.096066975	1	-38.42294448
M8152	3B	818871534	0.170697572	0.020618557	99	0.076700864	0.096051282	1	-61.44762821
M12857	6A	92320684	0.170779446	0.371134021	99	0.076700864	0.096043797	1	48.74503256
M8075	3B	590943948	0.170789373	0.391752577	99	0.076700864	0.09604289	1	22.28178186
M508	1A	0	0.170844038	0.443298969	99	0.076700864	0.096037895	1	-23.09281081
M6377	3A	45033405	0.170859039	0.474226804	99	0.076700864	0.096036525	1	-28.38869163
M3793	2B	96381383	0.170874959	0.164948454	99	0.076700864	0.096035071	1	26.43535316
M9790	4D	469431667	0.170928544	0.494845361	99	0.076700864	0.096030178	1	21.88346639
M3979	2B	218209754	0.171045977	0.340206186	99	0.076700864	0.096019461	1	-48.9660399
M12763	6A	391337338	0.171093705	0.453608247	99	0.076700864	0.096015107	1	-28.72193792
M7260	3B	47019723	0.171163608	0.432989691	99	0.076700864	0.096008734	1	22.91499196
M5204	2B	124972475	0.171179559	0.113402062	99	0.076700864	0.09600728	1	28.02818582
M10887	5B	367689148	0.171203883	0.443298969	99	0.076700864	0.096005063	1	21.81148557
M1035	1B	46096564	0.171219764	0.443298969	99	0.076700864	0.096003616	1	-30.75309033
[truncated: 13,601 more rows]
